# Supplementary material for: Cortical Pathology in Vanishing White Matter
Source: MDPI journal article supplement (doi:10.3390/cells11223581), 2022-11-12
Supplement: s1 [file s1]

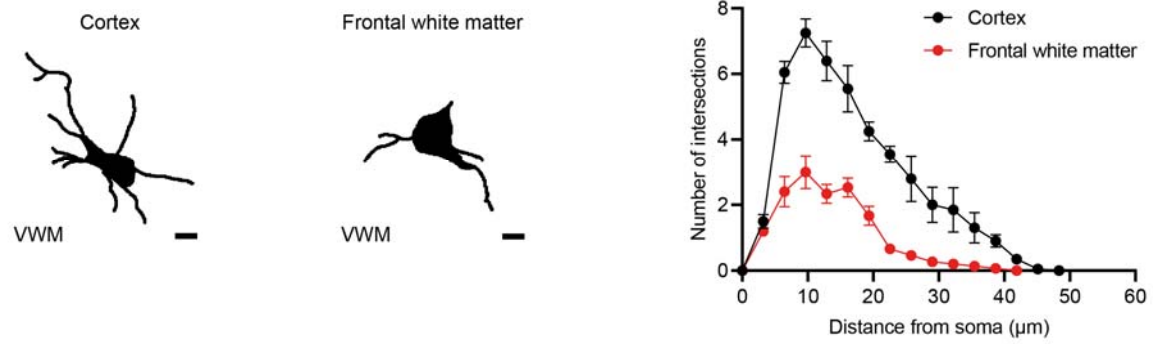

Figure S1. Astrocytes show region-dependent vulnerability in VWM gray and white matter brain tissue.
