# Supplementary material for: Cortical Pathology in Vanishing White Matter
Source: Cells. 2022 Nov 12;11(22):3581. doi: 10.3390/cells11223581 (PMC9688115; doi:10.3390/cells11223581)
Supplement: Supplementary file 1 [file cells-11-03581-s001.zip]

Archive with 7 entries (7 files):
- cells-1858119-Figure S1.pdf
- cells-1858119_Man et al. Table S1_final.xlsx
- cells-1858119_Man et al. Table S2_final.xlsx
- cells-1858119_Man et al. Table S3_final.xlsx
- cells-1858119_Man et al. Table S4_final.xlsx
- cells-1858119_Man et al. Table S5_final.xlsx
- cells-1858119_Man et al. Table S6_final.xlsx
