# Supplementary material for: Cortical Pathology in Vanishing White Matter
Source: Cells. 2022 Nov 12;11(22):3581. doi: 10.3390/cells11223581 (PMC9688115; doi:10.3390/cells11223581)
Supplement: Supplementary file 1 [file cells-11-03581-s001.zip › cells-1858119_Man et al. Table S1_final.xlsx]

## Sheet: Table S1
Protein name	ProteinID	Protein description	Fasta headers	Log2(LFQ intesity_Ctrl1)	Log2(LFQ intesity_Ctrl2)	Log2(LFQ intesity_Ctrl3)	Log2(LFQ intesity_Ctrl4)	Log2(LFQ intensity_VWM1)	Log2(LFQ intensity_VWM2)	Log2(LFQ intensity_VWM3)	Log2(LFQ intensity_VWM4)
A0A0J9YX94	A0A0J9YX94		sp|A0A0J9YX94|PMA6F_HUMAN Paraneoplastic antigen Ma6F OS=Homo sapiens OX=9606 GN=PNMA6F PE=4 SV=1	22.1582	NA	NA	NA	21.7267	21.8227	NA	22.5968
A2M	P01023	Alpha-2-macroglobulin	sp|P01023|A2MG_HUMAN Alpha-2-macroglobulin OS=Homo sapiens OX=9606 GN=A2M PE=1 SV=3	26.3097	27.2703	25.6148	26.9557	26.4223	27.1472	27.2962	22.7835
AACS	Q86V21	Acetoacetyl-CoA synthetase	sp|Q86V21|AACS_HUMAN Acetoacetyl-CoA synthetase OS=Homo sapiens OX=9606 GN=AACS PE=1 SV=1	21.8806	22.2875	22.1892	NA	NA	NA	NA	NA
AAK1	Q2M2I8	AP2-associated protein kinase 1	sp|Q2M2I8|AAK1_HUMAN AP2-associated protein kinase 1 OS=Homo sapiens OX=9606 GN=AAK1 PE=1 SV=3	28.0234	28.0699	28.0634	27.821	28.5843	28.3302	28.3206	27.6881
AARS	P49588	Alanine--tRNA ligase, cytoplasmic	sp|P49588|SYAC_HUMAN Alanine--tRNA ligase, cytoplasmic OS=Homo sapiens OX=9606 GN=AARS PE=1 SV=2	29.2125	29.1111	29.1274	29.3508	30.1426	29.5909	29.7402	29.4963
AARSD1	Q9BTE6	Alanyl-tRNA editing protein Aarsd1	sp|Q9BTE6|AASD1_HUMAN Alanyl-tRNA editing protein Aarsd1 OS=Homo sapiens OX=9606 GN=AARSD1 PE=1 SV=2	23.4648	24.6214	24.221	24.1255	24.0967	23.9536	23.7349	25.5762
AASDHPPT	Q9NRN7	L-aminoadipate-semialdehyde dehydrogenase-phosphopantetheinyl transferase	sp|Q9NRN7|ADPPT_HUMAN L-aminoadipate-semialdehyde dehydrogenase-phosphopantetheinyl transferase OS=Homo sapiens OX=9606 GN=AASDHPPT PE=1 SV=2	24.4151	24.3975	24.1862	24.2706	23.7589	24.6283	24.2944	23.9129
ABAT	P80404	4-aminobutyrate aminotransferase, mitochondrial	sp|P80404|GABT_HUMAN 4-aminobutyrate aminotransferase, mitochondrial OS=Homo sapiens OX=9606 GN=ABAT PE=1 SV=3	28.11	28.3139	28.3319	28.0826	26.6344	27.2768	27.6227	26.6791
ABCA2	Q9BZC7	ATP-binding cassette sub-family A member 2	sp|Q9BZC7|ABCA2_HUMAN ATP-binding cassette sub-family A member 2 OS=Homo sapiens OX=9606 GN=ABCA2 PE=1 SV=4	NA	NA	NA	NA	NA	21.4629	NA	NA
ABCB6	Q9NP58	ATP-binding cassette sub-family B member 6, mitochondrial	sp|Q9NP58|ABCB6_HUMAN ATP-binding cassette sub-family B member 6, mitochondrial OS=Homo sapiens OX=9606 GN=ABCB6 PE=1 SV=1	NA	NA	NA	NA	NA	21.5595	NA	NA
ABCB7	O75027	ATP-binding cassette sub-family B member 7, mitochondrial	sp|O75027|ABCB7_HUMAN ATP-binding cassette sub-family B member 7, mitochondrial OS=Homo sapiens OX=9606 GN=ABCB7 PE=1 SV=2	23.0712	23.179	23.1875	22.805	23.5362	23.1225	NA	23.3627
ABCB8	Q9NUT2	ATP-binding cassette sub-family B member 8, mitochondrial	sp|Q9NUT2|ABCB8_HUMAN ATP-binding cassette sub-family B member 8, mitochondrial OS=Homo sapiens OX=9606 GN=ABCB8 PE=1 SV=3	23.2208	23.4502	23.0176	22.5003	NA	23.3978	22.9763	23.2643
ABCD3	P28288	ATP-binding cassette sub-family D member 3	sp|P28288|ABCD3_HUMAN ATP-binding cassette sub-family D member 3 OS=Homo sapiens OX=9606 GN=ABCD3 PE=1 SV=1	NA	22.3641	22.4006	NA	NA	22.4113	NA	NA
ABCE1	P61221	ATP-binding cassette sub-family E member 1	sp|P61221|ABCE1_HUMAN ATP-binding cassette sub-family E member 1 OS=Homo sapiens OX=9606 GN=ABCE1 PE=1 SV=1	23.7971	24.1685	23.8224	23.5266	23.9013	24.0758	24.2708	23.7486
ABCF1	Q8NE71	ATP-binding cassette sub-family F member 1	sp|Q8NE71|ABCF1_HUMAN ATP-binding cassette sub-family F member 1 OS=Homo sapiens OX=9606 GN=ABCF1 PE=1 SV=2	23.9828	24.1392	24.4315	24.5602	25.1387	24.3533	24.785	24.1746
ABCF3	Q9NUQ8	ATP-binding cassette sub-family F member 3	sp|Q9NUQ8|ABCF3_HUMAN ATP-binding cassette sub-family F member 3 OS=Homo sapiens OX=9606 GN=ABCF3 PE=1 SV=2	22.8516	22.7296	22.8357	22.805	NA	22.5636	NA	22.8644
ABHD10	Q9NUJ1	Mycophenolic acid acyl-glucuronide esterase, mitochondrial	sp|Q9NUJ1|ABHDA_HUMAN Mycophenolic acid acyl-glucuronide esterase, mitochondrial OS=Homo sapiens OX=9606 GN=ABHD10 PE=1 SV=1	26.5561	26.9349	26.5886	26.9641	24.2257	24.4182	25.258	22.5384
ABHD11	Q8NFV4	Alpha/beta hydrolase domain-containing protein 11	sp|Q8NFV4|ABHDB_HUMAN Protein ABHD11 OS=Homo sapiens OX=9606 GN=ABHD11 PE=1 SV=1	23.9104	23.9299	23.7383	24.2932	24.3369	23.0382	24.1712	23.5
ABHD12	Q8N2K0	Monoacylglycerol lipase ABHD12	sp|Q8N2K0|ABD12_HUMAN Lysophosphatidylserine lipase ABHD12 OS=Homo sapiens OX=9606 GN=ABHD12 PE=1 SV=2	24.1965	23.6617	NA	NA	NA	23.502	24.1846	NA
ABHD14B	Q96IU4	Alpha/beta hydrolase domain-containing protein 14B	sp|Q96IU4|ABHEB_HUMAN Protein ABHD14B OS=Homo sapiens OX=9606 GN=ABHD14B PE=1 SV=1	22.9751	NA	22.9876	23.1524	NA	22.9972	NA	NA
ABHD16A	O95870	Abhydrolase domain-containing protein 16A	sp|O95870|ABHGA_HUMAN Phosphatidylserine lipase ABHD16A OS=Homo sapiens OX=9606 GN=ABHD16A PE=1 SV=3	23.1975	23.6018	23.4752	23.5377	24.0961	24.1889	24.0049	23.4165
ABHD5	Q8WTS1	1-acylglycerol-3-phosphate O-acyltransferase ABHD5	sp|Q8WTS1|ABHD5_HUMAN 1-acylglycerol-3-phosphate O-acyltransferase ABHD5 OS=Homo sapiens OX=9606 GN=ABHD5 PE=1 SV=1	NA	NA	NA	NA	22.9434	NA	NA	NA
ABI1	Q8IZP0	Abl interactor 1	sp|Q8IZP0|ABI1_HUMAN Abl interactor 1 OS=Homo sapiens OX=9606 GN=ABI1 PE=1 SV=4	26.3476	26.1302	26.3377	26.4743	25.8858	26.4841	27.3659	26.4693
ABI2	Q9NYB9	Abl interactor 2	sp|Q9NYB9|ABI2_HUMAN Abl interactor 2 OS=Homo sapiens OX=9606 GN=ABI2 PE=1 SV=1	27.1513	27.0998	27.192	26.7542	26.3579	27.3607	28.1089	27.3038
ABLIM1	O14639	Actin-binding LIM protein 1	sp|O14639|ABLM1_HUMAN Actin-binding LIM protein 1 OS=Homo sapiens OX=9606 GN=ABLIM1 PE=1 SV=3	25.2459	25.0325	25.5149	26.1933	24.4488	25.0523	24.4661	24.7238
ABLIM2	Q6H8Q1	Actin-binding LIM protein 2	sp|Q6H8Q1|ABLM2_HUMAN Actin-binding LIM protein 2 OS=Homo sapiens OX=9606 GN=ABLIM2 PE=1 SV=2	26.2147	26.0194	26.1996	26.3044	25.5422	26.4639	26.192	26.1747
ABLIM3	O94929	Actin-binding LIM protein 3	sp|O94929|ABLM3_HUMAN Actin-binding LIM protein 3 OS=Homo sapiens OX=9606 GN=ABLIM3 PE=1 SV=3	22.8758	22.3774	NA	22.145	23.0191	22.6257	23.4025	23.0962
ABR	Q12979	Active breakpoint cluster region-related protein	sp|Q12979|ABR_HUMAN Active breakpoint cluster region-related protein OS=Homo sapiens OX=9606 GN=ABR PE=1 SV=2	26.9482	26.9786	26.7972	26.819	27.0544	27.7469	27.4929	27.8768
ACAA1	P09110	3-ketoacyl-CoA thiolase, peroxisomal	sp|P09110|THIK_HUMAN 3-ketoacyl-CoA thiolase, peroxisomal OS=Homo sapiens OX=9606 GN=ACAA1 PE=1 SV=2	24.1011	25.0481	24.4727	25.1293	NA	22.8534	22.4854	23.3327
ACAA2	P42765	3-ketoacyl-CoA thiolase, mitochondrial	sp|P42765|THIM_HUMAN 3-ketoacyl-CoA thiolase, mitochondrial OS=Homo sapiens OX=9606 GN=ACAA2 PE=1 SV=2	27.6013	27.7742	27.6094	27.8534	26.4439	26.3394	26.5236	26.9786
ACACA	Q13085	Acetyl-CoA carboxylase 1;Biotin carboxylase	sp|Q13085|ACACA_HUMAN Acetyl-CoA carboxylase 1 OS=Homo sapiens OX=9606 GN=ACACA PE=1 SV=2	25.621	25.9702	25.9172	25.6575	26.2068	26.033	25.684	26.0741
ACAD8	Q9UKU7	Isobutyryl-CoA dehydrogenase, mitochondrial	sp|Q9UKU7|ACAD8_HUMAN Isobutyryl-CoA dehydrogenase, mitochondrial OS=Homo sapiens OX=9606 GN=ACAD8 PE=1 SV=1	24.309	24.8643	25.4101	24.7294	23.2283	24.0008	24.0846	23.9615
ACAD9	Q9H845	Acyl-CoA dehydrogenase family member 9, mitochondrial	sp|Q9H845|ACAD9_HUMAN Acyl-CoA dehydrogenase family member 9, mitochondrial OS=Homo sapiens OX=9606 GN=ACAD9 PE=1 SV=1	25.6948	26.1645	26.6146	26.3275	23.8986	24.9762	25.231	25.1732
ACADM	P11310	Medium-chain specific acyl-CoA dehydrogenase, mitochondrial	sp|P11310|ACADM_HUMAN Medium-chain specific acyl-CoA dehydrogenase, mitochondrial OS=Homo sapiens OX=9606 GN=ACADM PE=1 SV=1	26.5943	26.8123	26.5011	26.7046	25.2529	25.4688	26.517	25.5075
ACADS	P16219	Short-chain specific acyl-CoA dehydrogenase, mitochondrial	sp|P16219|ACADS_HUMAN Short-chain specific acyl-CoA dehydrogenase, mitochondrial OS=Homo sapiens OX=9606 GN=ACADS PE=1 SV=1	25.0123	24.5667	24.7537	25.0916	NA	24.4687	24.5151	24.4554
ACADSB	P45954	Short/branched chain specific acyl-CoA dehydrogenase, mitochondrial	sp|P45954|ACDSB_HUMAN Short/branched chain specific acyl-CoA dehydrogenase, mitochondrial OS=Homo sapiens OX=9606 GN=ACADSB PE=1 SV=1	25.1467	25.2604	25.3375	24.6128	24.1257	24.4286	24.8361	24.9522
ACADVL	P49748	Very long-chain specific acyl-CoA dehydrogenase, mitochondrial	sp|P49748|ACADV_HUMAN Very long-chain specific acyl-CoA dehydrogenase, mitochondrial OS=Homo sapiens OX=9606 GN=ACADVL PE=1 SV=1	26.5637	27.1282	27.2466	27.1302	26.0119	26.1126	26.1631	26.3493
ACAN	P16112	Aggrecan core protein;Aggrecan core protein 2	sp|P16112|PGCA_HUMAN Aggrecan core protein OS=Homo sapiens OX=9606 GN=ACAN PE=1 SV=3	23.9851	24.7475	24.5666	25.1126	24.9516	23.5814	24.7599	24.1336
ACAT1	P24752	Acetyl-CoA acetyltransferase, mitochondrial	sp|P24752|THIL_HUMAN Acetyl-CoA acetyltransferase, mitochondrial OS=Homo sapiens OX=9606 GN=ACAT1 PE=1 SV=1	29.767	29.5182	29.2594	29.1852	27.8145	28.8782	28.8089	28.5552
ACAT2	Q9BWD1	Acetyl-CoA acetyltransferase, cytosolic	sp|Q9BWD1|THIC_HUMAN Acetyl-CoA acetyltransferase, cytosolic OS=Homo sapiens OX=9606 GN=ACAT2 PE=1 SV=2	23.9713	24.6827	24.1746	25.2165	NA	23.2716	NA	NA
ACBD5	Q5T8D3	Acyl-CoA-binding domain-containing protein 5	sp|Q5T8D3|ACBD5_HUMAN Acyl-CoA-binding domain-containing protein 5 OS=Homo sapiens OX=9606 GN=ACBD5 PE=1 SV=1	23.4253	NA	22.8443	23.0875	23.0528	22.9336	23.0572	23.1811
ACBD7	Q8N6N7	Acyl-CoA-binding domain-containing protein 7	sp|Q8N6N7|ACBD7_HUMAN Acyl-CoA-binding domain-containing protein 7 OS=Homo sapiens OX=9606 GN=ACBD7 PE=1 SV=1	23.546	24.2944	24.3119	24.0913	NA	23.6517	NA	25.1841
ACLY	P53396	ATP-citrate synthase	sp|P53396|ACLY_HUMAN ATP-citrate synthase OS=Homo sapiens OX=9606 GN=ACLY PE=1 SV=3	27.8733	28.0713	28.1264	28.0385	27.8487	27.7293	27.9344	27.028
ACO1	P21399	Cytoplasmic aconitate hydratase	sp|P21399|ACOC_HUMAN Cytoplasmic aconitate hydratase OS=Homo sapiens OX=9606 GN=ACO1 PE=1 SV=3	25.8031	26.1776	25.8937	25.9998	24.9472	24.8921	25.278	23.2175
ACO2	Q99798	Aconitate hydratase, mitochondrial	sp|Q99798|ACON_HUMAN Aconitate hydratase, mitochondrial OS=Homo sapiens OX=9606 GN=ACO2 PE=1 SV=2	31.0027	31.1934	30.9313	30.873	28.7985	29.6044	29.9769	28.7259
ACOT13	Q9NPJ3	Acyl-coenzyme A thioesterase 13;Acyl-coenzyme A thioesterase 13, N-terminally processed	sp|Q9NPJ3|ACO13_HUMAN Acyl-coenzyme A thioesterase 13 OS=Homo sapiens OX=9606 GN=ACOT13 PE=1 SV=1	25.5995	25.9144	25.8303	26.2714	22.8095	23.42	24.251	NA
ACOT7	O00154	Cytosolic acyl coenzyme A thioester hydrolase	sp|O00154|BACH_HUMAN Cytosolic acyl coenzyme A thioester hydrolase OS=Homo sapiens OX=9606 GN=ACOT7 PE=1 SV=3	28.0713	29.0485	28.8181	28.6047	25.1685	26.4529	27.0119	25.9844
ACOT8	O14734	Acyl-coenzyme A thioesterase 8	sp|O14734|ACOT8_HUMAN Acyl-coenzyme A thioesterase 8 OS=Homo sapiens OX=9606 GN=ACOT8 PE=1 SV=1	NA	NA	NA	NA	22.8681	22.1667	22.8092	23.3069
ACOT9	Q9Y305	Acyl-coenzyme A thioesterase 9, mitochondrial	sp|Q9Y305|ACOT9_HUMAN Acyl-coenzyme A thioesterase 9, mitochondrial OS=Homo sapiens OX=9606 GN=ACOT9 PE=1 SV=2	25.8841	25.6594	26.2942	26.2328	23.3788	24.1724	24.3826	24.882
ACP1	P24666	Low molecular weight phosphotyrosine protein phosphatase	sp|P24666|PPAC_HUMAN Low molecular weight phosphotyrosine protein phosphatase OS=Homo sapiens OX=9606 GN=ACP1 PE=1 SV=3	22.2484	NA	NA	NA	NA	23.2499	NA	NA
ACSBG1	Q96GR2	Long-chain-fatty-acid--CoA ligase ACSBG1	sp|Q96GR2|ACBG1_HUMAN Long-chain-fatty-acid--CoA ligase ACSBG1 OS=Homo sapiens OX=9606 GN=ACSBG1 PE=1 SV=2	23.4175	24.3641	24.5207	24.3528	NA	NA	NA	24.0839
ACSF2	Q96CM8	Acyl-CoA synthetase family member 2, mitochondrial	sp|Q96CM8|ACSF2_HUMAN Medium-chain acyl-CoA ligase ACSF2, mitochondrial OS=Homo sapiens OX=9606 GN=ACSF2 PE=1 SV=2	NA	NA	NA	NA	NA	22.0699	NA	NA
ACSF3	Q4G176	Acyl-CoA synthetase family member 3, mitochondrial	sp|Q4G176|ACSF3_HUMAN Malonate--CoA ligase ACSF3, mitochondrial OS=Homo sapiens OX=9606 GN=ACSF3 PE=1 SV=3	23.9941	24.1297	24.3074	24.4129	24.1376	23.7208	NA	NA
ACSL1	P33121	Long-chain-fatty-acid--CoA ligase 1	sp|P33121|ACSL1_HUMAN Long-chain-fatty-acid--CoA ligase 1 OS=Homo sapiens OX=9606 GN=ACSL1 PE=1 SV=1	22.7531	NA	23.3878	NA	25.2065	24.1667	24.1006	23.5738
ACSL3	O95573	Long-chain-fatty-acid--CoA ligase 3	sp|O95573|ACSL3_HUMAN Long-chain-fatty-acid--CoA ligase 3 OS=Homo sapiens OX=9606 GN=ACSL3 PE=1 SV=3	24.4665	24.7038	25.0114	24.6822	25.8832	24.6495	24.3401	25.5418
ACSL4	O60488	Long-chain-fatty-acid--CoA ligase 4	sp|O60488|ACSL4_HUMAN Long-chain-fatty-acid--CoA ligase 4 OS=Homo sapiens OX=9606 GN=ACSL4 PE=1 SV=2	NA	NA	NA	NA	24.0763	23.4427	23.9829	23.9599
ACSL6	Q9UKU0	Long-chain-fatty-acid--CoA ligase 6	sp|Q9UKU0|ACSL6_HUMAN Long-chain-fatty-acid--CoA ligase 6 OS=Homo sapiens OX=9606 GN=ACSL6 PE=1 SV=4	25.701	26.087	26.17	26.2607	25.4967	25.3744	26.1512	25.1665
ACSS1	Q9NUB1	Acetyl-coenzyme A synthetase 2-like, mitochondrial	sp|Q9NUB1|ACS2L_HUMAN Acetyl-coenzyme A synthetase 2-like, mitochondrial OS=Homo sapiens OX=9606 GN=ACSS1 PE=1 SV=2	24.9245	25.0785	24.9398	25.1196	NA	23.4616	22.9752	23.4726
ACSS2	Q9NR19	Acetyl-coenzyme A synthetase, cytoplasmic	sp|Q9NR19|ACSA_HUMAN Acetyl-coenzyme A synthetase, cytoplasmic OS=Homo sapiens OX=9606 GN=ACSS2 PE=1 SV=1	NA	23.4069	NA	NA	23.4878	23.3637	NA	NA
ACSS3	Q9H6R3	Acyl-CoA synthetase short-chain family member 3, mitochondrial	sp|Q9H6R3|ACSS3_HUMAN Acyl-CoA synthetase short-chain family member 3, mitochondrial OS=Homo sapiens OX=9606 GN=ACSS3 PE=1 SV=1	22.2233	NA	NA	22.8267	NA	NA	NA	NA
ACTB	P60709	Actin, cytoplasmic 1;Actin, cytoplasmic 1, N-terminally processed	sp|P60709|ACTB_HUMAN Actin, cytoplasmic 1 OS=Homo sapiens OX=9606 GN=ACTB PE=1 SV=1	25.9604	NA	NA	NA	27.3635	26.9208	26.4609	27.5555
ACTC1	P68032	Actin, alpha cardiac muscle 1;Actin, gamma-enteric smooth muscle;Actin, aortic smooth muscle;Actin, alpha skeletal muscle	sp|P68032|ACTC_HUMAN Actin, alpha cardiac muscle 1 OS=Homo sapiens OX=9606 GN=ACTC1 PE=1 SV=1;sp|P63267|ACTH_HUMAN Actin, gamma-enteric smooth muscle OS=Homo sapiens OX=9606 GN=ACTG2 PE=1 SV=1;sp|P62736|ACTA_HUMAN Actin, aortic smooth muscle OS=Homo sapien	23.613	23.8237	23.9489	24.7871	24.4182	22.3983	24.5785	23.4671
ACTG1	P63261	Actin, cytoplasmic 2;Actin, cytoplasmic 2, N-terminally processed	sp|P63261|ACTG_HUMAN Actin, cytoplasmic 2 OS=Homo sapiens OX=9606 GN=ACTG1 PE=1 SV=1	NA	NA	NA	NA	26.1068	26.2658	26.768	26.516
ACTL6B	O94805	Actin-like protein 6B	sp|O94805|ACL6B_HUMAN Actin-like protein 6B OS=Homo sapiens OX=9606 GN=ACTL6B PE=1 SV=1	NA	NA	NA	22.465	NA	NA	NA	NA
ACTN1	P12814	Alpha-actinin-1	sp|P12814|ACTN1_HUMAN Alpha-actinin-1 OS=Homo sapiens OX=9606 GN=ACTN1 PE=1 SV=2	29.4586	29.6119	29.3888	29.0977	27.688	29.2369	29.495	28.6319
ACTN2	P35609	Alpha-actinin-2	sp|P35609|ACTN2_HUMAN Alpha-actinin-2 OS=Homo sapiens OX=9606 GN=ACTN2 PE=1 SV=1	28.5761	28.6473	28.6739	27.928	26.979	29.6152	29.1463	27.0683
ACTN4	O43707	Alpha-actinin-4	sp|O43707|ACTN4_HUMAN Alpha-actinin-4 OS=Homo sapiens OX=9606 GN=ACTN4 PE=1 SV=2	28.4453	28.7339	28.6288	28.4555	27.0729	28.2729	28.9138	27.4286
ACTR10	Q9NZ32	Actin-related protein 10	sp|Q9NZ32|ARP10_HUMAN Actin-related protein 10 OS=Homo sapiens OX=9606 GN=ACTR10 PE=1 SV=1	23.5727	NA	23.7995	NA	NA	NA	NA	NA
ACTR1A	P61163	Alpha-centractin	sp|P61163|ACTZ_HUMAN Alpha-centractin OS=Homo sapiens OX=9606 GN=ACTR1A PE=1 SV=1	27.2108	27.1669	27.452	27.4931	26.3576	26.1721	26.9826	26.4792
ACTR1B	P42025	Beta-centractin	sp|P42025|ACTY_HUMAN Beta-centractin OS=Homo sapiens OX=9606 GN=ACTR1B PE=1 SV=1	24.5123	25.1589	25.5914	25.388	NA	24.4537	24.0312	24.962
ACTR2	P61160	Actin-related protein 2	sp|P61160|ARP2_HUMAN Actin-related protein 2 OS=Homo sapiens OX=9606 GN=ACTR2 PE=1 SV=1	26.5296	26.6939	26.7082	26.73	25.1239	26.2287	26.3895	25.3388
ACTR3	P61158	Actin-related protein 3	sp|P61158|ARP3_HUMAN Actin-related protein 3 OS=Homo sapiens OX=9606 GN=ACTR3 PE=1 SV=3	26.4251	26.7701	26.6802	26.7015	25.0764	25.9466	26.2152	25.412
ACTR3B	Q9P1U1	Actin-related protein 3B	sp|Q9P1U1|ARP3B_HUMAN Actin-related protein 3B OS=Homo sapiens OX=9606 GN=ACTR3B PE=2 SV=1	25.542	25.9862	25.3915	25.5284	NA	25.0307	26.1538	24.9705
ACYP2	P14621	Acylphosphatase-2	sp|P14621|ACYP2_HUMAN Acylphosphatase-2 OS=Homo sapiens OX=9606 GN=ACYP2 PE=1 SV=2	25.2428	25.2877	25.1259	25.452	24.9637	23.6409	24.5964	25.3056
ADAM11	O75078	Disintegrin and metalloproteinase domain-containing protein 11	sp|O75078|ADA11_HUMAN Disintegrin and metalloproteinase domain-containing protein 11 OS=Homo sapiens OX=9606 GN=ADAM11 PE=2 SV=3	23.1381	23.5757	23.7158	24.2225	NA	23.3314	23.5212	23.7697
ADAM22	Q9P0K1	Disintegrin and metalloproteinase domain-containing protein 22	sp|Q9P0K1|ADA22_HUMAN Disintegrin and metalloproteinase domain-containing protein 22 OS=Homo sapiens OX=9606 GN=ADAM22 PE=1 SV=1	25.1634	25.6822	26.1028	25.8327	24.8662	25.4124	25.5558	25.3433
ADAM23	O75077	Disintegrin and metalloproteinase domain-containing protein 23	sp|O75077|ADA23_HUMAN Disintegrin and metalloproteinase domain-containing protein 23 OS=Homo sapiens OX=9606 GN=ADAM23 PE=1 SV=1	25.0078	25.3056	25.3356	25.3386	25.4595	24.3164	24.8896	25.2738
ADAP1	O75689	Arf-GAP with dual PH domain-containing protein 1	sp|O75689|ADAP1_HUMAN Arf-GAP with dual PH domain-containing protein 1 OS=Homo sapiens OX=9606 GN=ADAP1 PE=1 SV=2	24.8459	24.7438	24.3549	24.5014	25.5565	25.3588	26.0195	25.7285
ADAR	P55265	Double-stranded RNA-specific adenosine deaminase	sp|P55265|DSRAD_HUMAN Double-stranded RNA-specific adenosine deaminase OS=Homo sapiens OX=9606 GN=ADAR PE=1 SV=4	23.7508	23.8674	23.9455	24.1993	24.3882	24.3998	24.93	NA
ADCK1	Q86TW2	Uncharacterized aarF domain-containing protein kinase 1	sp|Q86TW2|ADCK1_HUMAN Uncharacterized aarF domain-containing protein kinase 1 OS=Homo sapiens OX=9606 GN=ADCK1 PE=1 SV=2	NA	NA	NA	21.0284	NA	NA	NA	NA
ADCK3	Q8NI60	Atypical kinase ADCK3, mitochondrial	sp|Q8NI60|COQ8A_HUMAN Atypical kinase COQ8A, mitochondrial OS=Homo sapiens OX=9606 GN=COQ8A PE=1 SV=1	22.9463	NA	NA	NA	NA	NA	NA	NA
ADD1	P35611	Alpha-adducin	sp|P35611|ADDA_HUMAN Alpha-adducin OS=Homo sapiens OX=9606 GN=ADD1 PE=1 SV=2	29.5506	29.6102	29.4886	29.4962	27.8744	28.9603	29.365	28.5152
ADD2	P35612	Beta-adducin	sp|P35612|ADDB_HUMAN Beta-adducin OS=Homo sapiens OX=9606 GN=ADD2 PE=1 SV=3	29.1898	29.2722	29.3458	29.2236	27.2783	28.7231	29.1248	28.0515
ADD3	Q9UEY8	Gamma-adducin	sp|Q9UEY8|ADDG_HUMAN Gamma-adducin OS=Homo sapiens OX=9606 GN=ADD3 PE=1 SV=1	28.3863	27.9285	28.1098	28.5127	26.6333	26.8483	26.8138	26.7683
ADH5	P11766	Alcohol dehydrogenase class-3	sp|P11766|ADHX_HUMAN Alcohol dehydrogenase class-3 OS=Homo sapiens OX=9606 GN=ADH5 PE=1 SV=4	26.7546	26.8018	26.7941	27.104	24.4873	25.0484	25.5278	24.8965
ADIRF	Q15847	Adipogenesis regulatory factor	sp|Q15847|ADIRF_HUMAN Adipogenesis regulatory factor OS=Homo sapiens OX=9606 GN=ADIRF PE=1 SV=1	NA	NA	NA	22.9836	NA	NA	NA	NA
ADO	Q96SZ5	2-aminoethanethiol dioxygenase	sp|Q96SZ5|AEDO_HUMAN 2-aminoethanethiol dioxygenase OS=Homo sapiens OX=9606 GN=ADO PE=1 SV=2	NA	21.8647	NA	NA	NA	NA	NA	NA
ADPRHL2	Q9NX46	Poly(ADP-ribose) glycohydrolase ARH3	sp|Q9NX46|ARHL2_HUMAN ADP-ribose glycohydrolase ARH3 OS=Homo sapiens OX=9606 GN=ADPRHL2 PE=1 SV=1	22.6205	22.4532	NA	23.0129	NA	22.9946	22.9257	NA
ADRBK1	P25098	Beta-adrenergic receptor kinase 1	sp|P25098|ARBK1_HUMAN Beta-adrenergic receptor kinase 1 OS=Homo sapiens OX=9606 GN=GRK2 PE=1 SV=2	24.8594	24.9412	24.8242	24.7529	25.1045	25.2382	25.1399	25.1053
ADRM1	Q16186	Proteasomal ubiquitin receptor ADRM1	sp|Q16186|ADRM1_HUMAN Proteasomal ubiquitin receptor ADRM1 OS=Homo sapiens OX=9606 GN=ADRM1 PE=1 SV=2	23.9916	24.4589	24.4416	24.3037	24.3111	23.607	24.9581	22.7933
ADSL	P30566	Adenylosuccinate lyase	sp|P30566|PUR8_HUMAN Adenylosuccinate lyase OS=Homo sapiens OX=9606 GN=ADSL PE=1 SV=2	NA	22.5306	22.7044	22.3824	NA	NA	22.1015	NA
ADSS	P30520	Adenylosuccinate synthetase isozyme 2	sp|P30520|PURA2_HUMAN Adenylosuccinate synthetase isozyme 2 OS=Homo sapiens OX=9606 GN=ADSS PE=1 SV=3	24.0889	24.3133	24.2176	24.6897	23.3147	23.6014	24.0836	23.5355
AFG3L2	Q9Y4W6	AFG3-like protein 2	sp|Q9Y4W6|AFG32_HUMAN AFG3-like protein 2 OS=Homo sapiens OX=9606 GN=AFG3L2 PE=1 SV=2	27.6813	27.7455	27.7397	27.5423	27.8809	27.7997	27.8457	27.5914
AGAP1	Q9UPQ3	Arf-GAP with GTPase, ANK repeat and PH domain-containing protein 1	sp|Q9UPQ3|AGAP1_HUMAN Arf-GAP with GTPase, ANK repeat and PH domain-containing protein 1 OS=Homo sapiens OX=9606 GN=AGAP1 PE=1 SV=4	24.0718	23.7841	NA	23.5023	23.8255	24.3222	24.7161	23.9019
AGAP2	Q99490	Arf-GAP with GTPase, ANK repeat and PH domain-containing protein 2	sp|Q99490|AGAP2_HUMAN Arf-GAP with GTPase, ANK repeat and PH domain-containing protein 2 OS=Homo sapiens OX=9606 GN=AGAP2 PE=1 SV=2	25.8367	25.494	25.5414	25.2236	27.2099	26.6291	26.7799	27.9231
AGAP3	Q96P47	Arf-GAP with GTPase, ANK repeat and PH domain-containing protein 3	sp|Q96P47|AGAP3_HUMAN Arf-GAP with GTPase, ANK repeat and PH domain-containing protein 3 OS=Homo sapiens OX=9606 GN=AGAP3 PE=1 SV=2	26.6975	26.021	26.026	26.0408	26.7246	27.1146	27.1954	27.2061
AGFG1	P52594	Arf-GAP domain and FG repeat-containing protein 1	sp|P52594|AGFG1_HUMAN Arf-GAP domain and FG repeat-containing protein 1 OS=Homo sapiens OX=9606 GN=AGFG1 PE=1 SV=2	24.4241	24.6875	24.7718	25.4206	25.3907	25.05	23.6224	23.459
AGFG2	O95081	Arf-GAP domain and FG repeat-containing protein 2	sp|O95081|AGFG2_HUMAN Arf-GAP domain and FG repeat-containing protein 2 OS=Homo sapiens OX=9606 GN=AGFG2 PE=1 SV=2	24.2843	23.4294	NA	23.3024	NA	23.6148	NA	NA
AGK	Q53H12	Acylglycerol kinase, mitochondrial	sp|Q53H12|AGK_HUMAN Acylglycerol kinase, mitochondrial OS=Homo sapiens OX=9606 GN=AGK PE=1 SV=2	24.6648	25.271	25.308	26.5687	22.8675	23.8926	23.0419	22.0763
AGL	P35573	Glycogen debranching enzyme;4-alpha-glucanotransferase;Amylo-alpha-1,6-glucosidase	sp|P35573|GDE_HUMAN Glycogen debranching enzyme OS=Homo sapiens OX=9606 GN=AGL PE=1 SV=3	25.472	26.4468	25.868	25.9404	23.1737	24.7684	24.8986	24.2587
AGPAT3	Q9NRZ7	1-acyl-sn-glycerol-3-phosphate acyltransferase gamma	sp|Q9NRZ7|PLCC_HUMAN 1-acyl-sn-glycerol-3-phosphate acyltransferase gamma OS=Homo sapiens OX=9606 GN=AGPAT3 PE=1 SV=1	NA	NA	NA	24.0785	NA	NA	NA	NA
AGPAT5	Q9NUQ2	1-acyl-sn-glycerol-3-phosphate acyltransferase epsilon	sp|Q9NUQ2|PLCE_HUMAN 1-acyl-sn-glycerol-3-phosphate acyltransferase epsilon OS=Homo sapiens OX=9606 GN=AGPAT5 PE=1 SV=3	23.8608	23.8749	NA	24.1128	NA	23.8571	NA	NA
AGPS	O00116	Alkyldihydroxyacetonephosphate synthase, peroxisomal	sp|O00116|ADAS_HUMAN Alkyldihydroxyacetonephosphate synthase, peroxisomal OS=Homo sapiens OX=9606 GN=AGPS PE=1 SV=1	22.8045	23.4122	23.4493	NA	NA	22.7215	23.0528	23.2302
AGRN	O00468	Agrin;Agrin N-terminal 110 kDa subunit;Agrin C-terminal 110 kDa subunit;Agrin C-terminal 90 kDa fragment;Agrin C-terminal 22 kDa fragment	sp|O00468|AGRIN_HUMAN Agrin OS=Homo sapiens OX=9606 GN=AGRN PE=1 SV=6	24.2202	24.9077	24.6154	24.4786	25.5318	24.9209	26.148	25.7431
AGT	P01019	Angiotensinogen;Angiotensin-1;Angiotensin-2;Angiotensin-3;Angiotensin-4;Angiotensin 1-9;Angiotensin 1-7;Angiotensin 1-5;Angiotensin 1-4	sp|P01019|ANGT_HUMAN Angiotensinogen OS=Homo sapiens OX=9606 GN=AGT PE=1 SV=1	23.9773	24.0422	23.6725	24.6628	NA	NA	23.4349	NA
AGTPBP1	Q9UPW5	Cytosolic carboxypeptidase 1	sp|Q9UPW5|CBPC1_HUMAN Cytosolic carboxypeptidase 1 OS=Homo sapiens OX=9606 GN=AGTPBP1 PE=1 SV=3	21.631	21.5494	22.0329	21.5173	21.835	21.9727	22.5476	21.4337
AHCY	P23526	Adenosylhomocysteinase	sp|P23526|SAHH_HUMAN Adenosylhomocysteinase OS=Homo sapiens OX=9606 GN=AHCY PE=1 SV=4	25.8382	26.3371	25.7678	26.3177	NA	22.8185	23.5706	23.4798
AHCYL1	O43865	Putative adenosylhomocysteinase 2	sp|O43865|SAHH2_HUMAN S-adenosylhomocysteine hydrolase-like protein 1 OS=Homo sapiens OX=9606 GN=AHCYL1 PE=1 SV=2	27.6641	27.567	27.6775	27.8975	22.2502	24.8939	24.6753	24.1847
AHCYL2	Q96HN2	Putative adenosylhomocysteinase 3	sp|Q96HN2|SAHH3_HUMAN Adenosylhomocysteinase 3 OS=Homo sapiens OX=9606 GN=AHCYL2 PE=1 SV=1	24.9248	24.9577	25.2029	24.7995	NA	23.0812	NA	23.8413
AHNAK	Q09666	Neuroblast differentiation-associated protein AHNAK	sp|Q09666|AHNK_HUMAN Neuroblast differentiation-associated protein AHNAK OS=Homo sapiens OX=9606 GN=AHNAK PE=1 SV=2	26.9935	25.8613	26.3628	27.504	26.4622	24.9558	23.7999	26.6479
AHNAK2	Q8IVF2	Protein AHNAK2	sp|Q8IVF2|AHNK2_HUMAN Protein AHNAK2 OS=Homo sapiens OX=9606 GN=AHNAK2 PE=1 SV=2	25.8527	26.793	26.8781	27.002	23.2473	24.4643	25.4491	24.1484
AHSA1	O95433	Activator of 90 kDa heat shock protein ATPase homolog 1	sp|O95433|AHSA1_HUMAN Activator of 90 kDa heat shock protein ATPase homolog 1 OS=Homo sapiens OX=9606 GN=AHSA1 PE=1 SV=1	26.7042	26.5038	26.6887	27.3477	27.1884	27.126	27.3353	26.0546
AIDA	Q96BJ3	Axin interactor, dorsalization-associated protein	sp|Q96BJ3|AIDA_HUMAN Axin interactor, dorsalization-associated protein OS=Homo sapiens OX=9606 GN=AIDA PE=1 SV=1	NA	NA	NA	23.5134	24.1688	NA	NA	NA
AIF1L	Q9BQI0	Allograft inflammatory factor 1-like	sp|Q9BQI0|AIF1L_HUMAN Allograft inflammatory factor 1-like OS=Homo sapiens OX=9606 GN=AIF1L PE=1 SV=1	NA	NA	NA	23.2949	NA	NA	NA	NA
AIFM1	O95831	Apoptosis-inducing factor 1, mitochondrial	sp|O95831|AIFM1_HUMAN Apoptosis-inducing factor 1, mitochondrial OS=Homo sapiens OX=9606 GN=AIFM1 PE=1 SV=1	27.0178	27.0644	27.1352	27.029	26.66	26.7948	27.2294	26.741
AIFM3	Q96NN9	Apoptosis-inducing factor 3	sp|Q96NN9|AIFM3_HUMAN Apoptosis-inducing factor 3 OS=Homo sapiens OX=9606 GN=AIFM3 PE=1 SV=1	NA	23.0288	23.1177	22.8435	NA	21.692	NA	22.1016
AIMP1	Q12904	Aminoacyl tRNA synthase complex-interacting multifunctional protein 1;Endothelial monocyte-activating polypeptide 2	sp|Q12904|AIMP1_HUMAN Aminoacyl tRNA synthase complex-interacting multifunctional protein 1 OS=Homo sapiens OX=9606 GN=AIMP1 PE=1 SV=2	24.8487	24.8646	24.8223	24.7372	24.8522	25.2914	24.8731	25.5717
AIP	O00170	AH receptor-interacting protein	sp|O00170|AIP_HUMAN AH receptor-interacting protein OS=Homo sapiens OX=9606 GN=AIP PE=1 SV=2	24.2467	24.7774	24.4196	24.6363	25.423	25.0261	24.3528	25.416
AK1	P00568	Adenylate kinase isoenzyme 1	sp|P00568|KAD1_HUMAN Adenylate kinase isoenzyme 1 OS=Homo sapiens OX=9606 GN=AK1 PE=1 SV=3	28.9976	29.0493	29.1346	29.1593	28.9501	29.1307	29.3406	29.1718
AK2	P54819	Adenylate kinase 2, mitochondrial;Adenylate kinase 2, mitochondrial, N-terminally processed	sp|P54819|KAD2_HUMAN Adenylate kinase 2, mitochondrial OS=Homo sapiens OX=9606 GN=AK2 PE=1 SV=2	NA	22.9825	NA	NA	23.4758	NA	NA	NA
AK3	Q9UIJ7	GTP:AMP phosphotransferase AK3, mitochondrial	sp|Q9UIJ7|KAD3_HUMAN GTP:AMP phosphotransferase AK3, mitochondrial OS=Homo sapiens OX=9606 GN=AK3 PE=1 SV=4	27.3984	27.0389	26.1984	27.3026	25.6853	25.3127	24.4847	24.7826
AK4	P27144	Adenylate kinase 4, mitochondrial	sp|P27144|KAD4_HUMAN Adenylate kinase 4, mitochondrial OS=Homo sapiens OX=9606 GN=AK4 PE=1 SV=1	26.3004	25.758	25.9022	26.2318	26.4996	26.0888	25.5854	25.6149
AK5	Q9Y6K8	Adenylate kinase isoenzyme 5	sp|Q9Y6K8|KAD5_HUMAN Adenylate kinase isoenzyme 5 OS=Homo sapiens OX=9606 GN=AK5 PE=1 SV=2	28.2854	28.1903	28.4277	27.992	28.2735	28.2971	28.4594	28.742
AKAP10	O43572	A-kinase anchor protein 10, mitochondrial	sp|O43572|AKA10_HUMAN A-kinase anchor protein 10, mitochondrial OS=Homo sapiens OX=9606 GN=AKAP10 PE=1 SV=2	23.6762	23.2694	23.4843	23.5709	23.7124	23.6943	23.9733	24.4017
AKAP12	Q02952	A-kinase anchor protein 12	sp|Q02952|AKA12_HUMAN A-kinase anchor protein 12 OS=Homo sapiens OX=9606 GN=AKAP12 PE=1 SV=4	28.8394	29.0153	29.2538	29.4534	29.4309	28.7343	28.4995	27.9696
AKAP5	P24588	A-kinase anchor protein 5	sp|P24588|AKAP5_HUMAN A-kinase anchor protein 5 OS=Homo sapiens OX=9606 GN=AKAP5 PE=1 SV=3	24.3473	24.4661	25.1359	25.4388	25.0508	25.252	25.9495	24.5929
AKAP7	O43687	A-kinase anchor protein 7 isoforms alpha and beta;A-kinase anchor protein 7 isoform gamma	sp|O43687|AKA7A_HUMAN A-kinase anchor protein 7 isoforms alpha and beta OS=Homo sapiens OX=9606 GN=AKAP7 PE=1 SV=4;sp|Q9P0M2|AKA7G_HUMAN A-kinase anchor protein 7 isoform gamma OS=Homo sapiens OX=9606 GN=AKAP7 PE=1 SV=2	24.7795	24.1602	24.6295	24.5038	NA	25.0789	24.6282	25.2245
AKR1A1	P14550	Alcohol dehydrogenase [NADP(+)]	sp|P14550|AK1A1_HUMAN Aldo-keto reductase family 1 member A1 OS=Homo sapiens OX=9606 GN=AKR1A1 PE=1 SV=3	25.3391	25.4868	25.0823	25.8764	26.0235	26.0186	25.8064	25.3668
AKR1B1	P15121	Aldose reductase	sp|P15121|ALDR_HUMAN Aldo-keto reductase family 1 member B1 OS=Homo sapiens OX=9606 GN=AKR1B1 PE=1 SV=3	24.4131	24.4741	24.1871	25.1979	22.7282	22.7265	23.0395	NA
AKR1D1	P51857	3-oxo-5-beta-steroid 4-dehydrogenase	sp|P51857|AK1D1_HUMAN Aldo-keto reductase family 1 member D1 OS=Homo sapiens OX=9606 GN=AKR1D1 PE=1 SV=1	23.8844	23.0934	23.1949	23.635	24.2034	23.359	NA	25.5997
AKR7A2	O43488	Aflatoxin B1 aldehyde reductase member 2	sp|O43488|ARK72_HUMAN Aflatoxin B1 aldehyde reductase member 2 OS=Homo sapiens OX=9606 GN=AKR7A2 PE=1 SV=3	25.9525	25.9203	25.0389	26.0991	24.1455	23.5281	24.0603	23.6349
AKT3	Q9Y243	RAC-gamma serine/threonine-protein kinase	sp|Q9Y243|AKT3_HUMAN RAC-gamma serine/threonine-protein kinase OS=Homo sapiens OX=9606 GN=AKT3 PE=1 SV=1	23.6366	23.9301	23.7157	24.0625	NA	23.9989	24.3946	23.2424
ALAD	P13716	Delta-aminolevulinic acid dehydratase	sp|P13716|HEM2_HUMAN Delta-aminolevulinic acid dehydratase OS=Homo sapiens OX=9606 GN=ALAD PE=1 SV=1	24.3376	23.5048	23.3306	24.789	NA	23.2902	24.2681	NA
ALCAM	Q13740	CD166 antigen	sp|Q13740|CD166_HUMAN CD166 antigen OS=Homo sapiens OX=9606 GN=ALCAM PE=1 SV=2	25.8733	25.9064	25.9365	25.3956	26.4214	26.7277	26.6717	26.5034
ALDH18A1	P54886	Delta-1-pyrroline-5-carboxylate synthase;Glutamate 5-kinase;Gamma-glutamyl phosphate reductase	sp|P54886|P5CS_HUMAN Delta-1-pyrroline-5-carboxylate synthase OS=Homo sapiens OX=9606 GN=ALDH18A1 PE=1 SV=2	22.9439	NA	22.4409	NA	22.5096	22.4437	NA	NA
ALDH1A1	P00352	Retinal dehydrogenase 1	sp|P00352|AL1A1_HUMAN Retinal dehydrogenase 1 OS=Homo sapiens OX=9606 GN=ALDH1A1 PE=1 SV=2	25.5385	26.8573	26.3121	26.7295	NA	22.4577	23.3365	NA
ALDH1B1	P30837	Aldehyde dehydrogenase X, mitochondrial	sp|P30837|AL1B1_HUMAN Aldehyde dehydrogenase X, mitochondrial OS=Homo sapiens OX=9606 GN=ALDH1B1 PE=1 SV=3	24.6964	26.0249	24.6521	25.7003	NA	25.7505	24.497	23.4851
ALDH1L1	O75891	Cytosolic 10-formyltetrahydrofolate dehydrogenase	sp|O75891|AL1L1_HUMAN Cytosolic 10-formyltetrahydrofolate dehydrogenase OS=Homo sapiens OX=9606 GN=ALDH1L1 PE=1 SV=2	27.3859	27.5291	27.4353	27.5896	26.2663	27.4812	27.396	27.4041
ALDH2	P05091	Aldehyde dehydrogenase, mitochondrial	sp|P05091|ALDH2_HUMAN Aldehyde dehydrogenase, mitochondrial OS=Homo sapiens OX=9606 GN=ALDH2 PE=1 SV=2	30.3321	30.1658	29.8568	30.5291	27.9986	28.9718	29.4731	27.6866
ALDH3A2	P51648	Fatty aldehyde dehydrogenase	sp|P51648|AL3A2_HUMAN Aldehyde dehydrogenase family 3 member A2 OS=Homo sapiens OX=9606 GN=ALDH3A2 PE=1 SV=1	24.9397	25.0476	25.0446	24.7787	25.8868	25.3105	24.6651	24.5857
ALDH4A1	P30038	Delta-1-pyrroline-5-carboxylate dehydrogenase, mitochondrial	sp|P30038|AL4A1_HUMAN Delta-1-pyrroline-5-carboxylate dehydrogenase, mitochondrial OS=Homo sapiens OX=9606 GN=ALDH4A1 PE=1 SV=3	28.3193	27.9629	27.8644	28.0913	22.891	26.1774	25.7067	25.0062
ALDH5A1	P51649	Succinate-semialdehyde dehydrogenase, mitochondrial	sp|P51649|SSDH_HUMAN Succinate-semialdehyde dehydrogenase, mitochondrial OS=Homo sapiens OX=9606 GN=ALDH5A1 PE=1 SV=2	28.9091	29.028	28.9719	28.9295	25.6105	27.2705	26.7816	26.7836
ALDH6A1	Q02252	Methylmalonate-semialdehyde dehydrogenase [acylating], mitochondrial	sp|Q02252|MMSA_HUMAN Methylmalonate-semialdehyde dehydrogenase [acylating], mitochondrial OS=Homo sapiens OX=9606 GN=ALDH6A1 PE=1 SV=2	28.7487	28.7923	28.507	29.0556	28.1351	28.7083	29.1844	27.7737
ALDH7A1	P49419	Alpha-aminoadipic semialdehyde dehydrogenase	sp|P49419|AL7A1_HUMAN Alpha-aminoadipic semialdehyde dehydrogenase OS=Homo sapiens OX=9606 GN=ALDH7A1 PE=1 SV=5	27.1638	26.8703	26.276	28.0257	24.1497	23.4554	23.0982	NA
ALDH9A1	P49189	4-trimethylaminobutyraldehyde dehydrogenase	sp|P49189|AL9A1_HUMAN 4-trimethylaminobutyraldehyde dehydrogenase OS=Homo sapiens OX=9606 GN=ALDH9A1 PE=1 SV=3	28.077	27.9094	27.9785	28.1887	25.4851	25.8937	26.0545	25.7688
ALDOA	P04075	Fructose-bisphosphate aldolase A	sp|P04075|ALDOA_HUMAN Fructose-bisphosphate aldolase A OS=Homo sapiens OX=9606 GN=ALDOA PE=1 SV=2	32.04	31.8869	31.7513	31.94	29.0885	29.3067	30.0135	30.0492
ALDOC	P09972	Fructose-bisphosphate aldolase C	sp|P09972|ALDOC_HUMAN Fructose-bisphosphate aldolase C OS=Homo sapiens OX=9606 GN=ALDOC PE=1 SV=2	31.5443	31.5264	31.4858	31.8706	27.208	28.3199	29.1337	28.1662
ALG2	Q9H553	Alpha-1,3/1,6-mannosyltransferase ALG2	sp|Q9H553|ALG2_HUMAN Alpha-1,3/1,6-mannosyltransferase ALG2 OS=Homo sapiens OX=9606 GN=ALG2 PE=1 SV=1	NA	NA	22.6295	22.5784	NA	NA	NA	NA
ALS2	Q96Q42	Alsin	sp|Q96Q42|ALS2_HUMAN Alsin OS=Homo sapiens OX=9606 GN=ALS2 PE=1 SV=2	NA	NA	NA	NA	NA	NA	NA	22.4713
ALYREF	Q86V81	THO complex subunit 4	sp|Q86V81|THOC4_HUMAN THO complex subunit 4 OS=Homo sapiens OX=9606 GN=ALYREF PE=1 SV=3	NA	NA	NA	NA	NA	NA	23.1033	NA
AMER2	Q8N7J2	APC membrane recruitment protein 2	sp|Q8N7J2|AMER2_HUMAN APC membrane recruitment protein 2 OS=Homo sapiens OX=9606 GN=AMER2 PE=1 SV=3	23.5745	NA	24.1595	24.4879	NA	23.0169	23.6315	23.3483
AMPD2	Q01433	AMP deaminase 2	sp|Q01433|AMPD2_HUMAN AMP deaminase 2 OS=Homo sapiens OX=9606 GN=AMPD2 PE=1 SV=2	24.6968	24.3357	24.6873	24.5109	NA	23.6333	23.0083	24.6533
AMPH	P49418	Amphiphysin	sp|P49418|AMPH_HUMAN Amphiphysin OS=Homo sapiens OX=9606 GN=AMPH PE=1 SV=1	30.0593	29.9355	29.9101	29.9263	28.5771	29.3065	29.9467	28.4885
ANK1	P16157	Ankyrin-1	sp|P16157|ANK1_HUMAN Ankyrin-1 OS=Homo sapiens OX=9606 GN=ANK1 PE=1 SV=3	23.511	23.2696	22.4859	23.597	24.0114	24.1432	23.8769	23.5121
ANK2	Q01484	Ankyrin-2	sp|Q01484|ANK2_HUMAN Ankyrin-2 OS=Homo sapiens OX=9606 GN=ANK2 PE=1 SV=4	30.5464	30.6683	30.7438	30.6254	30.3157	31.0809	31.1052	30.947
ANK3	Q12955	Ankyrin-3	sp|Q12955|ANK3_HUMAN Ankyrin-3 OS=Homo sapiens OX=9606 GN=ANK3 PE=1 SV=3	27.8414	28.0093	28.2875	28.0072	27.8681	28.3951	28.5156	28.4977
ANKFY1	Q9P2R3	Rabankyrin-5	sp|Q9P2R3|ANFY1_HUMAN Rabankyrin-5 OS=Homo sapiens OX=9606 GN=ANKFY1 PE=1 SV=2	24.698	24.6812	24.8872	25.0817	24.8135	24.7836	25.2982	25.3884
ANKMY2	Q8IV38	Ankyrin repeat and MYND domain-containing protein 2	sp|Q8IV38|ANKY2_HUMAN Ankyrin repeat and MYND domain-containing protein 2 OS=Homo sapiens OX=9606 GN=ANKMY2 PE=1 SV=1	23.8522	23.9882	24.3603	24.8155	24.2952	24.4251	24.2636	24.9975
ANKRD29	Q8N6D5	Ankyrin repeat domain-containing protein 29	sp|Q8N6D5|ANR29_HUMAN Ankyrin repeat domain-containing protein 29 OS=Homo sapiens OX=9606 GN=ANKRD29 PE=2 SV=2	NA	23.0059	22.9809	22.8788	NA	NA	NA	NA
ANKS1B	Q7Z6G8	Ankyrin repeat and sterile alpha motif domain-containing protein 1B	sp|Q7Z6G8|ANS1B_HUMAN Ankyrin repeat and sterile alpha motif domain-containing protein 1B OS=Homo sapiens OX=9606 GN=ANKS1B PE=1 SV=2	25.1007	25.4646	25.3634	25.052	24.8956	25.9111	22.4326	25.669
ANLN	Q9NQW6	Actin-binding protein anillin	sp|Q9NQW6|ANLN_HUMAN Anillin OS=Homo sapiens OX=9606 GN=ANLN PE=1 SV=2	24.0331	26.325	26.476	27.3348	22.9434	23.4048	25.1411	23.2104
ANO10	Q9NW15	Anoctamin-10	sp|Q9NW15|ANO10_HUMAN Anoctamin-10 OS=Homo sapiens OX=9606 GN=ANO10 PE=1 SV=2	NA	NA	22.3184	NA	NA	NA	NA	NA
ANP32A	P39687	Acidic leucine-rich nuclear phosphoprotein 32 family member A	sp|P39687|AN32A_HUMAN Acidic leucine-rich nuclear phosphoprotein 32 family member A OS=Homo sapiens OX=9606 GN=ANP32A PE=1 SV=1	25.6735	25.8618	26.1549	26.1501	24.9696	25.6141	25.1869	24.8124
ANP32B	Q92688	Acidic leucine-rich nuclear phosphoprotein 32 family member B	sp|Q92688|AN32B_HUMAN Acidic leucine-rich nuclear phosphoprotein 32 family member B OS=Homo sapiens OX=9606 GN=ANP32B PE=1 SV=1	23.1559	23.1733	23.4782	NA	NA	23.758	NA	NA
ANP32E	Q9BTT0	Acidic leucine-rich nuclear phosphoprotein 32 family member E	sp|Q9BTT0|AN32E_HUMAN Acidic leucine-rich nuclear phosphoprotein 32 family member E OS=Homo sapiens OX=9606 GN=ANP32E PE=1 SV=1	NA	NA	NA	23.8535	NA	NA	NA	NA
ANXA1	P04083	Annexin A1	sp|P04083|ANXA1_HUMAN Annexin A1 OS=Homo sapiens OX=9606 GN=ANXA1 PE=1 SV=2	26.9039	26.3913	26.6836	26.33	28.7952	26.9141	27.6213	27.4799
ANXA11	P50995	Annexin A11	sp|P50995|ANX11_HUMAN Annexin A11 OS=Homo sapiens OX=9606 GN=ANXA11 PE=1 SV=1	25.6792	25.6501	25.8961	25.5481	25.3447	26.0278	25.2397	24.257
ANXA2	P07355	Annexin A2;Putative annexin A2-like protein	sp|P07355|ANXA2_HUMAN Annexin A2 OS=Homo sapiens OX=9606 GN=ANXA2 PE=1 SV=2;sp|A6NMY6|AXA2L_HUMAN Putative annexin A2-like protein OS=Homo sapiens OX=9606 GN=ANXA2P2 PE=5 SV=2	27.3151	26.9597	26.1073	27.2226	30.0531	26.6866	28.1143	27.5939
ANXA3	P12429	Annexin A3	sp|P12429|ANXA3_HUMAN Annexin A3 OS=Homo sapiens OX=9606 GN=ANXA3 PE=1 SV=3	23.2266	23.4419	22.9853	23.7375	23.5689	22.5557	23.7891	23.6717
ANXA4	P09525	Annexin A4	sp|P09525|ANXA4_HUMAN Annexin A4 OS=Homo sapiens OX=9606 GN=ANXA4 PE=1 SV=4	24.5707	24.7166	24.6103	24.0465	25.0747	23.0496	24.2506	23.5641
ANXA5	P08758	Annexin A5	sp|P08758|ANXA5_HUMAN Annexin A5 OS=Homo sapiens OX=9606 GN=ANXA5 PE=1 SV=2	29.5974	29.5975	29.7999	29.8492	31.6845	29.588	30.3658	30.4535
ANXA6	P08133	Annexin A6	sp|P08133|ANXA6_HUMAN Annexin A6 OS=Homo sapiens OX=9606 GN=ANXA6 PE=1 SV=3	30.8342	31.0924	31.187	30.8992	30.9523	30.9805	31.5305	31.3746
ANXA7	P20073	Annexin A7	sp|P20073|ANXA7_HUMAN Annexin A7 OS=Homo sapiens OX=9606 GN=ANXA7 PE=1 SV=3	27.8157	27.7986	27.7444	27.7437	27.925	27.2888	27.4926	27.8898
AP1B1	Q10567	AP-1 complex subunit beta-1	sp|Q10567|AP1B1_HUMAN AP-1 complex subunit beta-1 OS=Homo sapiens OX=9606 GN=AP1B1 PE=1 SV=2	27.0426	27.3892	27.3337	27.381	26.7023	27.3173	27.266	26.1662
AP1G1	O43747	AP-1 complex subunit gamma-1	sp|O43747|AP1G1_HUMAN AP-1 complex subunit gamma-1 OS=Homo sapiens OX=9606 GN=AP1G1 PE=1 SV=5	25.9186	26.302	26.3278	26.0362	26.3036	26.4928	26.43	25.9842
AP1M1	Q9BXS5	AP-1 complex subunit mu-1	sp|Q9BXS5|AP1M1_HUMAN AP-1 complex subunit mu-1 OS=Homo sapiens OX=9606 GN=AP1M1 PE=1 SV=3	25.2255	25.0355	25.2837	24.7993	24.9463	25.5566	26.1442	24.8008
AP1S1	P61966	AP-1 complex subunit sigma-1A	sp|P61966|AP1S1_HUMAN AP-1 complex subunit sigma-1A OS=Homo sapiens OX=9606 GN=AP1S1 PE=1 SV=1	24.2996	24.5426	24.4888	24.1705	22.7395	24.3083	24.111	22.7835
AP2A1	O95782	AP-2 complex subunit alpha-1	sp|O95782|AP2A1_HUMAN AP-2 complex subunit alpha-1 OS=Homo sapiens OX=9606 GN=AP2A1 PE=1 SV=3	29.5371	29.6102	29.7225	29.2813	29.2738	29.8825	29.7344	28.8974
AP2A2	O94973	AP-2 complex subunit alpha-2	sp|O94973|AP2A2_HUMAN AP-2 complex subunit alpha-2 OS=Homo sapiens OX=9606 GN=AP2A2 PE=1 SV=2	28.8839	28.8181	28.8877	28.7405	28.2263	29.0976	29.0697	28.028
AP2B1	P63010	AP-2 complex subunit beta	sp|P63010|AP2B1_HUMAN AP-2 complex subunit beta OS=Homo sapiens OX=9606 GN=AP2B1 PE=1 SV=1	29.7539	29.7455	29.6862	29.3415	28.9416	30.0588	30.4008	29.0363
AP2M1	Q96CW1	AP-2 complex subunit mu	sp|Q96CW1|AP2M1_HUMAN AP-2 complex subunit mu OS=Homo sapiens OX=9606 GN=AP2M1 PE=1 SV=2	30.0702	29.9651	29.9654	29.8918	28.6743	29.7204	30.5768	29.3396
AP2S1	P53680	AP-2 complex subunit sigma	sp|P53680|AP2S1_HUMAN AP-2 complex subunit sigma OS=Homo sapiens OX=9606 GN=AP2S1 PE=1 SV=2	27.7031	27.9815	27.9766	27.7348	26.5675	27.6361	27.9385	26.8203
AP3B1	O00203	AP-3 complex subunit beta-1	sp|O00203|AP3B1_HUMAN AP-3 complex subunit beta-1 OS=Homo sapiens OX=9606 GN=AP3B1 PE=1 SV=3	23.2968	23.4248	23.3697	23.2763	24.3793	23.5374	23.7613	23.342
AP3B2	Q13367	AP-3 complex subunit beta-2	sp|Q13367|AP3B2_HUMAN AP-3 complex subunit beta-2 OS=Homo sapiens OX=9606 GN=AP3B2 PE=1 SV=2	27.9422	27.9566	27.8594	27.7183	27.7749	28.295	28.4031	27.8501
AP3D1	O14617	AP-3 complex subunit delta-1	sp|O14617|AP3D1_HUMAN AP-3 complex subunit delta-1 OS=Homo sapiens OX=9606 GN=AP3D1 PE=1 SV=1	28.0529	27.9611	27.8956	27.5471	27.6551	28.3849	28.0915	27.1839
AP3M1	Q9Y2T2	AP-3 complex subunit mu-1	sp|Q9Y2T2|AP3M1_HUMAN AP-3 complex subunit mu-1 OS=Homo sapiens OX=9606 GN=AP3M1 PE=1 SV=1	23.9973	24.1457	24.1633	23.9155	23.9613	24.423	23.9517	NA
AP3M2	P53677	AP-3 complex subunit mu-2	sp|P53677|AP3M2_HUMAN AP-3 complex subunit mu-2 OS=Homo sapiens OX=9606 GN=AP3M2 PE=2 SV=1	26.3837	26.2127	26.2032	25.9438	24.9782	26.4977	25.6058	24.5698
AP3S1	Q92572	AP-3 complex subunit sigma-1	sp|Q92572|AP3S1_HUMAN AP-3 complex subunit sigma-1 OS=Homo sapiens OX=9606 GN=AP3S1 PE=1 SV=1	23.7406	23.3664	23.6644	23.7137	NA	22.9507	23.2177	NA
AP3S2	P59780	AP-3 complex subunit sigma-2	sp|P59780|AP3S2_HUMAN AP-3 complex subunit sigma-2 OS=Homo sapiens OX=9606 GN=AP3S2 PE=2 SV=1	NA	22.8636	22.3034	NA	NA	NA	NA	NA
AP4S1	Q9Y587	AP-4 complex subunit sigma-1	sp|Q9Y587|AP4S1_HUMAN AP-4 complex subunit sigma-1 OS=Homo sapiens OX=9606 GN=AP4S1 PE=1 SV=1	NA	NA	NA	NA	NA	NA	19.7723	NA
APBA1	Q02410	Amyloid beta A4 precursor protein-binding family A member 1	sp|Q02410|APBA1_HUMAN Amyloid-beta A4 precursor protein-binding family A member 1 OS=Homo sapiens OX=9606 GN=APBA1 PE=1 SV=3	22.8508	22.7646	22.7389	22.8903	NA	23.0129	NA	NA
APBA2	Q99767	Amyloid beta A4 precursor protein-binding family A member 2	sp|Q99767|APBA2_HUMAN Amyloid-beta A4 precursor protein-binding family A member 2 OS=Homo sapiens OX=9606 GN=APBA2 PE=1 SV=3	NA	NA	22.8143	NA	NA	NA	NA	NA
APBB1	O00213	Amyloid beta A4 precursor protein-binding family B member 1	sp|O00213|APBB1_HUMAN Amyloid-beta A4 precursor protein-binding family B member 1 OS=Homo sapiens OX=9606 GN=APBB1 PE=1 SV=2	23.007	23.4219	22.9346	22.9988	23.6642	22.8891	24.0222	NA
APEH	P13798	Acylamino-acid-releasing enzyme	sp|P13798|ACPH_HUMAN Acylamino-acid-releasing enzyme OS=Homo sapiens OX=9606 GN=APEH PE=1 SV=4	25.7675	26.2603	26.0898	26.3869	NA	23.5669	23.1702	23.4477
APEX1	P27695	DNA-(apurinic or apyrimidinic site) lyase;DNA-(apurinic or apyrimidinic site) lyase, mitochondrial	sp|P27695|APEX1_HUMAN DNA-(apurinic or apyrimidinic site) lyase OS=Homo sapiens OX=9606 GN=APEX1 PE=1 SV=2	22.451	NA	NA	23.3477	24.3262	23.3101	22.8074	23.9223
API5	Q9BZZ5	Apoptosis inhibitor 5	sp|Q9BZZ5|API5_HUMAN Apoptosis inhibitor 5 OS=Homo sapiens OX=9606 GN=API5 PE=1 SV=3	25.441	25.2566	25.2536	25.2424	NA	25.3611	25.8758	NA
APLP1	P51693	Amyloid-like protein 1;C30	sp|P51693|APLP1_HUMAN Amyloid-like protein 1 OS=Homo sapiens OX=9606 GN=APLP1 PE=1 SV=3	23.8105	23.2641	23.1514	23.8489	NA	23.4532	24.3519	23.3441
APMAP	Q9HDC9	Adipocyte plasma membrane-associated protein	sp|Q9HDC9|APMAP_HUMAN Adipocyte plasma membrane-associated protein OS=Homo sapiens OX=9606 GN=APMAP PE=1 SV=2	26.8545	26.6509	26.539	26.7262	27.2681	27.061	27.1321	26.5135
APOA1	P02647	Apolipoprotein A-I;Proapolipoprotein A-I;Truncated apolipoprotein A-I	sp|P02647|APOA1_HUMAN Apolipoprotein A-I OS=Homo sapiens OX=9606 GN=APOA1 PE=1 SV=1	27.171	28.3585	22.2397	27.8307	28.1492	27.2968	27.8413	27.0708
APOA1BP	Q8NCW5	NAD(P)H-hydrate epimerase	sp|Q8NCW5|NNRE_HUMAN NAD(P)H-hydrate epimerase OS=Homo sapiens OX=9606 GN=NAXE PE=1 SV=2	25.4704	26.6674	26.4652	26.6139	NA	23.9381	25.1495	23.8781
APOA2	P02652	Apolipoprotein A-II;Proapolipoprotein A-II;Truncated apolipoprotein A-II	sp|P02652|APOA2_HUMAN Apolipoprotein A-II OS=Homo sapiens OX=9606 GN=APOA2 PE=1 SV=1	25.0997	25.3867	NA	26.2577	25.8242	25.2614	25.4341	25.7131
APOB	P04114	Apolipoprotein B-100;Apolipoprotein B-48	sp|P04114|APOB_HUMAN Apolipoprotein B-100 OS=Homo sapiens OX=9606 GN=APOB PE=1 SV=2	NA	NA	NA	NA	23.5472	22.6151	NA	NA
APOC1	P02654	Apolipoprotein C-I;Truncated apolipoprotein C-I	sp|P02654|APOC1_HUMAN Apolipoprotein C-I OS=Homo sapiens OX=9606 GN=APOC1 PE=1 SV=1	NA	NA	NA	NA	23.0919	22.6959	NA	23.838
APOD	P05090	Apolipoprotein D	sp|P05090|APOD_HUMAN Apolipoprotein D OS=Homo sapiens OX=9606 GN=APOD PE=1 SV=1	25.2304	24.1332	24.2513	25.7493	24.4275	23.5643	NA	NA
APOE	P02649	Apolipoprotein E	sp|P02649|APOE_HUMAN Apolipoprotein E OS=Homo sapiens OX=9606 GN=APOE PE=1 SV=1	28.908	28.6173	28.7926	28.6356	28.4756	27.6824	27.9346	28.1874
APOL2	Q9BQE5	Apolipoprotein L2	sp|Q9BQE5|APOL2_HUMAN Apolipoprotein L2 OS=Homo sapiens OX=9606 GN=APOL2 PE=1 SV=1	25.5102	25.4887	24.9764	25.4661	26.5579	24.2907	24.1588	24.2573
APOO	Q9BUR5	Apolipoprotein O	sp|Q9BUR5|MIC26_HUMAN MICOS complex subunit MIC26 OS=Homo sapiens OX=9606 GN=APOO PE=1 SV=1	26.0058	25.8139	25.86	25.8896	25.7193	25.9987	26.1982	24.6644
APOOL	Q6UXV4	MICOS complex subunit MIC27	sp|Q6UXV4|MIC27_HUMAN MICOS complex subunit MIC27 OS=Homo sapiens OX=9606 GN=APOOL PE=1 SV=1	24.8869	24.9053	24.8381	24.7656	25.3064	24.7797	25.3159	25.4948
APP	P05067	Amyloid beta A4 protein;N-APP;Soluble APP-alpha;Soluble APP-beta;C99;Beta-amyloid protein 42;Beta-amyloid protein 40;C83;P3(42);P3(40);C80;Gamma-secretase C-terminal fragment 59;Gamma-secretase C-terminal fragment 57;Gamma-secretase C-terminal fragment 50;C31	#VALUE!	#VALUE!	#VALUE!	#VALUE!	#VALUE!	#VALUE!	#VALUE!	#VALUE!	#VALUE!
APPL1	Q9UKG1	DCC-interacting protein 13-alpha	sp|Q9UKG1|DP13A_HUMAN DCC-interacting protein 13-alpha OS=Homo sapiens OX=9606 GN=APPL1 PE=1 SV=1	25.374	25.4254	25.6192	25.5482	25.0792	25.7448	26.1489	24.476
APPL2	Q8NEU8	DCC-interacting protein 13-beta	sp|Q8NEU8|DP13B_HUMAN DCC-interacting protein 13-beta OS=Homo sapiens OX=9606 GN=APPL2 PE=1 SV=3	24.1395	NA	24.0967	24.0254	NA	23.1178	NA	23.5841
APRT	P07741	Adenine phosphoribosyltransferase	sp|P07741|APT_HUMAN Adenine phosphoribosyltransferase OS=Homo sapiens OX=9606 GN=APRT PE=1 SV=2	24.2153	25.1503	NA	24.5742	25.2657	NA	26.2712	24.3981
AQP1	P29972	Aquaporin-1	sp|P29972|AQP1_HUMAN Aquaporin-1 OS=Homo sapiens OX=9606 GN=AQP1 PE=1 SV=3	NA	NA	NA	24.3031	NA	NA	NA	NA
AQP4	P55087	Aquaporin-4	sp|P55087|AQP4_HUMAN Aquaporin-4 OS=Homo sapiens OX=9606 GN=AQP4 PE=1 SV=2	27.7847	26.1914	27.3824	27.9793	26.9254	26.3568	25.5365	27.843
ARCN1	P48444	Coatomer subunit delta	sp|P48444|COPD_HUMAN Coatomer subunit delta OS=Homo sapiens OX=9606 GN=ARCN1 PE=1 SV=1	25.3638	25.4675	25.3531	25.2026	26.1758	25.3289	24.992	25.3425
ARF1	P84077	ADP-ribosylation factor 1;ADP-ribosylation factor 3	sp|P84077|ARF1_HUMAN ADP-ribosylation factor 1 OS=Homo sapiens OX=9606 GN=ARF1 PE=1 SV=2;sp|P61204|ARF3_HUMAN ADP-ribosylation factor 3 OS=Homo sapiens OX=9606 GN=ARF3 PE=1 SV=2	NA	23.7287	NA	24.7067	NA	NA	NA	NA
ARF4	P18085	ADP-ribosylation factor 4	sp|P18085|ARF4_HUMAN ADP-ribosylation factor 4 OS=Homo sapiens OX=9606 GN=ARF4 PE=1 SV=3	NA	NA	NA	24.0016	23.9746	23.7019	24.1097	23.5987
ARF5	P84085	ADP-ribosylation factor 5	sp|P84085|ARF5_HUMAN ADP-ribosylation factor 5 OS=Homo sapiens OX=9606 GN=ARF5 PE=1 SV=2	NA	NA	NA	24.3476	NA	NA	NA	NA
ARF6	P62330	ADP-ribosylation factor 6	sp|P62330|ARF6_HUMAN ADP-ribosylation factor 6 OS=Homo sapiens OX=9606 GN=ARF6 PE=1 SV=2	22.7046	22.8252	NA	23.2857	NA	22.8101	NA	NA
ARFGAP1	Q8N6T3	ADP-ribosylation factor GTPase-activating protein 1	sp|Q8N6T3|ARFG1_HUMAN ADP-ribosylation factor GTPase-activating protein 1 OS=Homo sapiens OX=9606 GN=ARFGAP1 PE=1 SV=2	25.7286	25.9711	25.9642	25.8837	25.6616	26.3923	24.2534	25.6467
ARFGAP2	Q8N6H7	ADP-ribosylation factor GTPase-activating protein 2	sp|Q8N6H7|ARFG2_HUMAN ADP-ribosylation factor GTPase-activating protein 2 OS=Homo sapiens OX=9606 GN=ARFGAP2 PE=1 SV=1	24.7943	24.5966	24.5769	24.8974	25.7892	25.0153	25.2913	25.7299
ARFGEF1	Q9Y6D6	Brefeldin A-inhibited guanine nucleotide-exchange protein 1	sp|Q9Y6D6|BIG1_HUMAN Brefeldin A-inhibited guanine nucleotide-exchange protein 1 OS=Homo sapiens OX=9606 GN=ARFGEF1 PE=1 SV=2	NA	23.2441	23.3847	22.973	NA	23.9062	23.458	22.5861
ARFGEF2	Q9Y6D5	Brefeldin A-inhibited guanine nucleotide-exchange protein 2	sp|Q9Y6D5|BIG2_HUMAN Brefeldin A-inhibited guanine nucleotide-exchange protein 2 OS=Homo sapiens OX=9606 GN=ARFGEF2 PE=1 SV=3	23.4232	23.5827	23.8895	23.8789	24.1742	23.7107	23.4458	23.2925
ARFGEF3	Q5TH69	Brefeldin A-inhibited guanine nucleotide-exchange protein 3	sp|Q5TH69|BIG3_HUMAN Brefeldin A-inhibited guanine nucleotide-exchange protein 3 OS=Homo sapiens OX=9606 GN=ARFGEF3 PE=1 SV=3	24.7686	25.3282	25.343	24.9498	25.7568	25.2268	26.1692	25.3726
ARFIP1	P53367	Arfaptin-1	sp|P53367|ARFP1_HUMAN Arfaptin-1 OS=Homo sapiens OX=9606 GN=ARFIP1 PE=1 SV=2	NA	NA	22.8922	22.6023	NA	NA	NA	NA
ARFIP2	P53365	Arfaptin-2	sp|P53365|ARFP2_HUMAN Arfaptin-2 OS=Homo sapiens OX=9606 GN=ARFIP2 PE=1 SV=1	25.0351	24.4464	24.4546	24.5463	23.9228	24.2159	24.5685	24.3503
ARHGAP1	Q07960	Rho GTPase-activating protein 1	sp|Q07960|RHG01_HUMAN Rho GTPase-activating protein 1 OS=Homo sapiens OX=9606 GN=ARHGAP1 PE=1 SV=1	26.7496	26.3842	26.1879	26.2302	27.1621	27.3322	26.9095	27.2127
ARHGAP21	Q5T5U3	Rho GTPase-activating protein 21	sp|Q5T5U3|RHG21_HUMAN Rho GTPase-activating protein 21 OS=Homo sapiens OX=9606 GN=ARHGAP21 PE=1 SV=2	24.036	23.9067	23.7364	24.0304	23.7247	24.5095	25.0893	24.3403
ARHGAP23	Q9P227	Rho GTPase-activating protein 23	sp|Q9P227|RHG23_HUMAN Rho GTPase-activating protein 23 OS=Homo sapiens OX=9606 GN=ARHGAP23 PE=1 SV=2	NA	NA	NA	NA	NA	23.6655	23.9231	24.2277
ARHGAP26	Q9UNA1	Rho GTPase-activating protein 26	sp|Q9UNA1|RHG26_HUMAN Rho GTPase-activating protein 26 OS=Homo sapiens OX=9606 GN=ARHGAP26 PE=1 SV=1	25.5489	25.4812	25.3864	25.3524	25.4929	25.9068	25.7258	24.2291
ARHGAP32	A7KAX9	Rho GTPase-activating protein 32	sp|A7KAX9|RHG32_HUMAN Rho GTPase-activating protein 32 OS=Homo sapiens OX=9606 GN=ARHGAP32 PE=1 SV=1	24.1313	24.2435	24.6232	24.1963	23.5989	25.5694	25.7842	25.8603
ARHGAP35	Q9NRY4	Rho GTPase-activating protein 35	sp|Q9NRY4|RHG35_HUMAN Rho GTPase-activating protein 35 OS=Homo sapiens OX=9606 GN=ARHGAP35 PE=1 SV=3	24.8926	25.0327	25.1875	25.0186	25.0017	25.3229	25.89	25.6216
ARHGAP39	Q9C0H5	Rho GTPase-activating protein 39	sp|Q9C0H5|RHG39_HUMAN Rho GTPase-activating protein 39 OS=Homo sapiens OX=9606 GN=ARHGAP39 PE=1 SV=2	22.432	NA	22.0121	22.2028	NA	22.3901	NA	NA
ARHGAP44	Q17R89	Rho GTPase-activating protein 44	sp|Q17R89|RHG44_HUMAN Rho GTPase-activating protein 44 OS=Homo sapiens OX=9606 GN=ARHGAP44 PE=1 SV=1	24.8892	25.273	25.1263	25.0637	25.0939	25.2844	25.6827	25.6332
ARHGAP5	Q13017	Rho GTPase-activating protein 5	sp|Q13017|RHG05_HUMAN Rho GTPase-activating protein 5 OS=Homo sapiens OX=9606 GN=ARHGAP5 PE=1 SV=2	22.9496	23.1307	22.995	23.4805	23.2327	23.086	22.9768	23.6381
ARHGDIA	P52565	Rho GDP-dissociation inhibitor 1	sp|P52565|GDIR1_HUMAN Rho GDP-dissociation inhibitor 1 OS=Homo sapiens OX=9606 GN=ARHGDIA PE=1 SV=3	26.014	26.5061	25.6707	27.7674	27.9707	29.2961	29.1647	26.2318
ARHGDIB	P52566	Rho GDP-dissociation inhibitor 2	sp|P52566|GDIR2_HUMAN Rho GDP-dissociation inhibitor 2 OS=Homo sapiens OX=9606 GN=ARHGDIB PE=1 SV=3	NA	NA	NA	23.2244	25.5571	23.8314	24.7339	NA
ARHGEF11	O15085	Rho guanine nucleotide exchange factor 11	sp|O15085|ARHGB_HUMAN Rho guanine nucleotide exchange factor 11 OS=Homo sapiens OX=9606 GN=ARHGEF11 PE=1 SV=1	23.5881	NA	NA	23.2954	24.1118	23.6536	NA	NA
ARHGEF12	Q9NZN5	Rho guanine nucleotide exchange factor 12	sp|Q9NZN5|ARHGC_HUMAN Rho guanine nucleotide exchange factor 12 OS=Homo sapiens OX=9606 GN=ARHGEF12 PE=1 SV=1	24.0565	24.1588	24.4878	23.9045	24.3268	24.3697	24.4924	24.9957
ARHGEF2	Q92974	Rho guanine nucleotide exchange factor 2	sp|Q92974|ARHG2_HUMAN Rho guanine nucleotide exchange factor 2 OS=Homo sapiens OX=9606 GN=ARHGEF2 PE=1 SV=4	27.2399	27.7526	27.9184	27.4449	27.4336	28.526	28.6504	28.9389
ARHGEF6	Q15052	Rho guanine nucleotide exchange factor 6	sp|Q15052|ARHG6_HUMAN Rho guanine nucleotide exchange factor 6 OS=Homo sapiens OX=9606 GN=ARHGEF6 PE=1 SV=2	23.0292	NA	NA	23.5292	NA	NA	NA	NA
ARHGEF7	Q14155	Rho guanine nucleotide exchange factor 7	sp|Q14155|ARHG7_HUMAN Rho guanine nucleotide exchange factor 7 OS=Homo sapiens OX=9606 GN=ARHGEF7 PE=1 SV=2	25.207	25.8173	25.8327	25.6026	25.5988	25.8584	25.831	25.4571
ARHGEF9	O43307	Rho guanine nucleotide exchange factor 9	sp|O43307|ARHG9_HUMAN Rho guanine nucleotide exchange factor 9 OS=Homo sapiens OX=9606 GN=ARHGEF9 PE=1 SV=3	22.5258	22.799	23.2112	23.2076	NA	22.7374	NA	23.6843
ARIH1	Q9Y4X5	E3 ubiquitin-protein ligase ARIH1	sp|Q9Y4X5|ARI1_HUMAN E3 ubiquitin-protein ligase ARIH1 OS=Homo sapiens OX=9606 GN=ARIH1 PE=1 SV=2	NA	22.2026	NA	22.5625	NA	NA	NA	NA
ARL15	Q9NXU5	ADP-ribosylation factor-like protein 15	sp|Q9NXU5|ARL15_HUMAN ADP-ribosylation factor-like protein 15 OS=Homo sapiens OX=9606 GN=ARL15 PE=1 SV=1	24.2561	24.7616	24.4716	23.8889	24.6639	25.1584	25.3749	25.2147
ARL2	P36404	ADP-ribosylation factor-like protein 2	sp|P36404|ARL2_HUMAN ADP-ribosylation factor-like protein 2 OS=Homo sapiens OX=9606 GN=ARL2 PE=1 SV=4	24.5688	24.5308	24.4216	25.3232	25.0377	24.7441	24.6665	24.5458
ARL3	P36405	ADP-ribosylation factor-like protein 3	sp|P36405|ARL3_HUMAN ADP-ribosylation factor-like protein 3 OS=Homo sapiens OX=9606 GN=ARL3 PE=1 SV=2	24.4535	24.7235	23.468	25.2283	25.6896	25.3412	25.6364	25.5138
ARL6	Q9H0F7	ADP-ribosylation factor-like protein 6	sp|Q9H0F7|ARL6_HUMAN ADP-ribosylation factor-like protein 6 OS=Homo sapiens OX=9606 GN=ARL6 PE=1 SV=1	23.1279	23.2701	22.9615	23.1628	NA	23.2039	23.0249	23.5932
ARL6IP5	O75915	PRA1 family protein 3	sp|O75915|PRAF3_HUMAN PRA1 family protein 3 OS=Homo sapiens OX=9606 GN=ARL6IP5 PE=1 SV=1	23.8054	24.4092	24.5575	24.3516	23.7098	23.7984	NA	24.1632
ARL8A	Q96BM9	ADP-ribosylation factor-like protein 8A	sp|Q96BM9|ARL8A_HUMAN ADP-ribosylation factor-like protein 8A OS=Homo sapiens OX=9606 GN=ARL8A PE=1 SV=1	23.8773	23.3864	23.096	23.8352	24.7833	23.9308	NA	NA
ARL8B	Q9NVJ2	ADP-ribosylation factor-like protein 8B	sp|Q9NVJ2|ARL8B_HUMAN ADP-ribosylation factor-like protein 8B OS=Homo sapiens OX=9606 GN=ARL8B PE=1 SV=1	24.8383	24.9632	24.5261	25.2259	24.8648	24.7327	23.9622	NA
ARMC1	Q9NVT9	Armadillo repeat-containing protein 1	sp|Q9NVT9|ARMC1_HUMAN Armadillo repeat-containing protein 1 OS=Homo sapiens OX=9606 GN=ARMC1 PE=1 SV=1	24.8802	24.861	24.7908	24.885	23.7508	24.5206	24.9563	NA
ARMC10	Q8N2F6	Armadillo repeat-containing protein 10	sp|Q8N2F6|ARM10_HUMAN Armadillo repeat-containing protein 10 OS=Homo sapiens OX=9606 GN=ARMC10 PE=1 SV=1	25.4255	25.389	25.3522	25.3789	25.1417	25.4195	25.1667	25.4789
ARMC8	Q8IUR7	Armadillo repeat-containing protein 8	sp|Q8IUR7|ARMC8_HUMAN Armadillo repeat-containing protein 8 OS=Homo sapiens OX=9606 GN=ARMC8 PE=1 SV=2	23.2153	23.4025	23.6865	23.3251	22.7587	22.7868	21.9165	22.572
ARMCX3	Q9UH62	Armadillo repeat-containing X-linked protein 3	sp|Q9UH62|ARMX3_HUMAN Armadillo repeat-containing X-linked protein 3 OS=Homo sapiens OX=9606 GN=ARMCX3 PE=1 SV=1	23.3766	23.8917	23.8832	23.5322	23.83	23.4482	23.5923	22.8467
ARMT1	Q9H993	Protein-glutamate O-methyltransferase	sp|Q9H993|ARMT1_HUMAN Damage-control phosphatase ARMT1 OS=Homo sapiens OX=9606 GN=ARMT1 PE=1 SV=1	24.4061	24.8119	24.8708	24.6319	23.9252	24.6257	24.9492	23.9566
ARPC1A	Q92747	Actin-related protein 2/3 complex subunit 1A	sp|Q92747|ARC1A_HUMAN Actin-related protein 2/3 complex subunit 1A OS=Homo sapiens OX=9606 GN=ARPC1A PE=2 SV=2	26.379	26.6389	26.6818	26.7132	24.629	25.5781	25.5995	25.9084
ARPC2	O15144	Actin-related protein 2/3 complex subunit 2	sp|O15144|ARPC2_HUMAN Actin-related protein 2/3 complex subunit 2 OS=Homo sapiens OX=9606 GN=ARPC2 PE=1 SV=1	27.5226	27.5441	27.5237	27.6485	25.4395	26.9289	27.8361	25.8251
ARPC3	O15145	Actin-related protein 2/3 complex subunit 3	sp|O15145|ARPC3_HUMAN Actin-related protein 2/3 complex subunit 3 OS=Homo sapiens OX=9606 GN=ARPC3 PE=1 SV=3	27.0252	27.2312	27.1444	27.4533	26.7145	26.7561	28.1002	26.3229
ARPC4	P59998	Actin-related protein 2/3 complex subunit 4	sp|P59998|ARPC4_HUMAN Actin-related protein 2/3 complex subunit 4 OS=Homo sapiens OX=9606 GN=ARPC4 PE=1 SV=3	27.4622	27.7949	27.995	28.0149	26.1119	26.8289	27.0393	26.4992
ARPC5	O15511	Actin-related protein 2/3 complex subunit 5	sp|O15511|ARPC5_HUMAN Actin-related protein 2/3 complex subunit 5 OS=Homo sapiens OX=9606 GN=ARPC5 PE=1 SV=3	23.8784	24.2981	24.5851	25.1745	NA	NA	NA	23.8726
ARPC5L	Q9BPX5	Actin-related protein 2/3 complex subunit 5-like protein	sp|Q9BPX5|ARP5L_HUMAN Actin-related protein 2/3 complex subunit 5-like protein OS=Homo sapiens OX=9606 GN=ARPC5L PE=1 SV=1	26.0127	26.7363	26.9584	27.2403	24.3566	24.6192	25.3498	26.0752
ARPIN	Q7Z6K5	Arpin	sp|Q7Z6K5|ARPIN_HUMAN Arpin OS=Homo sapiens OX=9606 GN=ARPIN PE=1 SV=1	NA	NA	NA	22.9733	NA	22.9386	NA	22.8512
ARRB1	P49407	Beta-arrestin-1	sp|P49407|ARRB1_HUMAN Beta-arrestin-1 OS=Homo sapiens OX=9606 GN=ARRB1 PE=1 SV=2	24.7131	25.1131	24.5646	24.6917	23.2516	22.8116	NA	NA
ASAH1	Q13510	Acid ceramidase;Acid ceramidase subunit alpha;Acid ceramidase subunit beta	sp|Q13510|ASAH1_HUMAN Acid ceramidase OS=Homo sapiens OX=9606 GN=ASAH1 PE=1 SV=5	24.5983	24.843	24.8386	25.8045	23.8842	23.8797	23.9593	23.21
ASAP1	Q9ULH1	Arf-GAP with SH3 domain, ANK repeat and PH domain-containing protein 1	sp|Q9ULH1|ASAP1_HUMAN Arf-GAP with SH3 domain, ANK repeat and PH domain-containing protein 1 OS=Homo sapiens OX=9606 GN=ASAP1 PE=1 SV=4	26.134	26.1133	26.367	26.2172	25.7432	26.9505	26.5567	25.4781
ASL	P04424	Argininosuccinate lyase	sp|P04424|ARLY_HUMAN Argininosuccinate lyase OS=Homo sapiens OX=9606 GN=ASL PE=1 SV=4	NA	24.2565	NA	NA	NA	NA	NA	NA
ASMTL	O95671	N-acetylserotonin O-methyltransferase-like protein	sp|O95671|ASML_HUMAN Probable bifunctional dTTP/UTP pyrophosphatase/methyltransferase protein OS=Homo sapiens OX=9606 GN=ASMTL PE=1 SV=3	23.6206	24.1564	24.5341	23.885	NA	24.3503	24.2247	NA
ASNA1	O43681	ATPase ASNA1	sp|O43681|ASNA_HUMAN ATPase ASNA1 OS=Homo sapiens OX=9606 GN=ASNA1 PE=1 SV=2	25.2916	25.5858	25.5097	26.002	26.2939	25.5979	26.2375	26.0655
ASNS	P08243	Asparagine synthetase [glutamine-hydrolyzing]	sp|P08243|ASNS_HUMAN Asparagine synthetase [glutamine-hydrolyzing] OS=Homo sapiens OX=9606 GN=ASNS PE=1 SV=4	23.3657	23.4553	23.4682	23.1386	24.442	NA	22.9888	23.9198
ASPA	P45381	Aspartoacylase	sp|P45381|ACY2_HUMAN Aspartoacylase OS=Homo sapiens OX=9606 GN=ASPA PE=1 SV=1	22.7494	23.1106	23.0831	24.3822	NA	22.7993	23.1437	NA
ASPH	Q12797	Aspartyl/asparaginyl beta-hydroxylase	sp|Q12797|ASPH_HUMAN Aspartyl/asparaginyl beta-hydroxylase OS=Homo sapiens OX=9606 GN=ASPH PE=1 SV=3	NA	23.1785	NA	NA	NA	NA	NA	NA
ASRGL1	Q7L266	Isoaspartyl peptidase/L-asparaginase;Isoaspartyl peptidase/L-asparaginase alpha chain;Isoaspartyl peptidase/L-asparaginase beta chain	sp|Q7L266|ASGL1_HUMAN Isoaspartyl peptidase/L-asparaginase OS=Homo sapiens OX=9606 GN=ASRGL1 PE=1 SV=2	22.6765	22.833	22.3161	23.5981	NA	NA	NA	NA
ASS1	P00966	Argininosuccinate synthase	sp|P00966|ASSY_HUMAN Argininosuccinate synthase OS=Homo sapiens OX=9606 GN=ASS1 PE=1 SV=2	24.0335	24.4276	24.0431	24.6872	24.6236	23.8914	23.4389	NA
ASTN1	O14525	Astrotactin-1	sp|O14525|ASTN1_HUMAN Astrotactin-1 OS=Homo sapiens OX=9606 GN=ASTN1 PE=2 SV=3	23.6413	22.9257	23.5089	23.1237	NA	23.8113	23.6379	NA
ATAD1	Q8NBU5	ATPase family AAA domain-containing protein 1	sp|Q8NBU5|ATAD1_HUMAN ATPase family AAA domain-containing protein 1 OS=Homo sapiens OX=9606 GN=ATAD1 PE=1 SV=1	22.9819	23.5295	23.8552	23.5693	NA	23.3148	23.0006	NA
ATAD3A	Q9NVI7	ATPase family AAA domain-containing protein 3A	sp|Q9NVI7|ATD3A_HUMAN ATPase family AAA domain-containing protein 3A OS=Homo sapiens OX=9606 GN=ATAD3A PE=1 SV=2	26.5534	26.3039	26.689	26.4346	27.4294	27.035	27.148	27.1018
ATAD3B	Q5T9A4	ATPase family AAA domain-containing protein 3B	sp|Q5T9A4|ATD3B_HUMAN ATPase family AAA domain-containing protein 3B OS=Homo sapiens OX=9606 GN=ATAD3B PE=1 SV=1	24.002	23.789	23.7824	NA	24.9188	24.9609	25.4741	24.5623
ATAT1	Q5SQI0	Alpha-tubulin N-acetyltransferase 1	sp|Q5SQI0|ATAT_HUMAN Alpha-tubulin N-acetyltransferase 1 OS=Homo sapiens OX=9606 GN=ATAT1 PE=1 SV=1	25.066	24.6825	24.7419	24.6888	25.4978	25.7303	26.1245	26.16
ATCAY	Q86WG3	Caytaxin	sp|Q86WG3|ATCAY_HUMAN Caytaxin OS=Homo sapiens OX=9606 GN=ATCAY PE=1 SV=2	26.5949	26.3794	26.218	26.0535	25.8694	26.5863	24.2757	24.6625
ATG2B	Q96BY7	Autophagy-related protein 2 homolog B	sp|Q96BY7|ATG2B_HUMAN Autophagy-related protein 2 homolog B OS=Homo sapiens OX=9606 GN=ATG2B PE=1 SV=5	23.001	23.5777	23.1902	23.15	23.6321	23.4721	23.0774	NA
ATG3	Q9NT62	Ubiquitin-like-conjugating enzyme ATG3	sp|Q9NT62|ATG3_HUMAN Ubiquitin-like-conjugating enzyme ATG3 OS=Homo sapiens OX=9606 GN=ATG3 PE=1 SV=1	25.2729	25.3707	25.1662	25.2042	25.9495	25.5594	25.8764	25.8241
ATG4B	Q9Y4P1	Cysteine protease ATG4B	sp|Q9Y4P1|ATG4B_HUMAN Cysteine protease ATG4B OS=Homo sapiens OX=9606 GN=ATG4B PE=1 SV=2	23.3707	23.0096	23.175	23.0887	23.7454	23.6484	23.4871	23.829
ATG7	O95352	Ubiquitin-like modifier-activating enzyme ATG7	sp|O95352|ATG7_HUMAN Ubiquitin-like modifier-activating enzyme ATG7 OS=Homo sapiens OX=9606 GN=ATG7 PE=1 SV=1	23.9625	24.2862	23.9533	23.5183	NA	23.4292	23.8344	NA
ATIC	P31939	Bifunctional purine biosynthesis protein PURH;Phosphoribosylaminoimidazolecarboxamide formyltransferase;IMP cyclohydrolase	sp|P31939|PUR9_HUMAN Bifunctional purine biosynthesis protein PURH OS=Homo sapiens OX=9606 GN=ATIC PE=1 SV=3	27.1799	27.5554	26.9394	27.4013	27.4523	27.6183	27.3953	27.6945
ATL1	Q8WXF7	Atlastin-1	sp|Q8WXF7|ATLA1_HUMAN Atlastin-1 OS=Homo sapiens OX=9606 GN=ATL1 PE=1 SV=1	27.3598	27.5231	27.7103	27.6348	27.076	27.7115	27.4901	27.0927
ATL2	Q8NHH9	Atlastin-2	sp|Q8NHH9|ATLA2_HUMAN Atlastin-2 OS=Homo sapiens OX=9606 GN=ATL2 PE=1 SV=2	NA	NA	NA	22.4904	NA	NA	NA	NA
ATL3	Q6DD88	Atlastin-3	sp|Q6DD88|ATLA3_HUMAN Atlastin-3 OS=Homo sapiens OX=9606 GN=ATL3 PE=1 SV=1	NA	NA	NA	NA	NA	22.4165	NA	NA
ATOX1	O00244	Copper transport protein ATOX1	sp|O00244|ATOX1_HUMAN Copper transport protein ATOX1 OS=Homo sapiens OX=9606 GN=ATOX1 PE=1 SV=1	22.5239	22.917	22.5188	NA	NA	NA	NA	NA
ATP1A1	P05023	Sodium/potassium-transporting ATPase subunit alpha-1	sp|P05023|AT1A1_HUMAN Sodium/potassium-transporting ATPase subunit alpha-1 OS=Homo sapiens OX=9606 GN=ATP1A1 PE=1 SV=1	30.7775	31.271	31.3173	31.0392	30.8101	31.238	31.3187	30.6772
ATP1A2	P50993	Sodium/potassium-transporting ATPase subunit alpha-2	sp|P50993|AT1A2_HUMAN Sodium/potassium-transporting ATPase subunit alpha-2 OS=Homo sapiens OX=9606 GN=ATP1A2 PE=1 SV=1	30.1143	30.3362	30.3939	30.4707	28.2494	29.5824	29.5536	29.6429
ATP1A3	P13637	Sodium/potassium-transporting ATPase subunit alpha-3	sp|P13637|AT1A3_HUMAN Sodium/potassium-transporting ATPase subunit alpha-3 OS=Homo sapiens OX=9606 GN=ATP1A3 PE=1 SV=3	30.2316	30.2743	30.3421	30.6103	30.361	30.4603	30.195	30.0991
ATP1B1	P05026	Sodium/potassium-transporting ATPase subunit beta-1	sp|P05026|AT1B1_HUMAN Sodium/potassium-transporting ATPase subunit beta-1 OS=Homo sapiens OX=9606 GN=ATP1B1 PE=1 SV=1	30.9056	31.1773	31.2072	31.0785	30.8144	31.0521	30.5347	30.8317
ATP1B2	P14415	Sodium/potassium-transporting ATPase subunit beta-2	sp|P14415|AT1B2_HUMAN Sodium/potassium-transporting ATPase subunit beta-2 OS=Homo sapiens OX=9606 GN=ATP1B2 PE=1 SV=3	28.65	28.4991	28.5531	28.74	26.7141	28.1227	28.313	27.7734
ATP1B3	P54709	Sodium/potassium-transporting ATPase subunit beta-3	sp|P54709|AT1B3_HUMAN Sodium/potassium-transporting ATPase subunit beta-3 OS=Homo sapiens OX=9606 GN=ATP1B3 PE=1 SV=1	22.8061	23.0541	23.3348	23.8152	NA	22.6294	NA	NA
ATP2A2	P16615	Sarcoplasmic/endoplasmic reticulum calcium ATPase 2	sp|P16615|AT2A2_HUMAN Sarcoplasmic/endoplasmic reticulum calcium ATPase 2 OS=Homo sapiens OX=9606 GN=ATP2A2 PE=1 SV=1	28.3397	28.8581	29.0048	28.4508	28.0889	28.9735	28.8946	28.6682
ATP2A3	Q93084	Sarcoplasmic/endoplasmic reticulum calcium ATPase 3	sp|Q93084|AT2A3_HUMAN Sarcoplasmic/endoplasmic reticulum calcium ATPase 3 OS=Homo sapiens OX=9606 GN=ATP2A3 PE=1 SV=2	22.1742	NA	NA	NA	25.0844	24.3724	NA	NA
ATP2B1	P20020	Plasma membrane calcium-transporting ATPase 1	sp|P20020|AT2B1_HUMAN Plasma membrane calcium-transporting ATPase 1 OS=Homo sapiens OX=9606 GN=ATP2B1 PE=1 SV=4	29.2214	29.4652	29.6374	29.1464	28.7164	29.6867	29.2314	28.4986
ATP2B2	Q01814	Plasma membrane calcium-transporting ATPase 2	sp|Q01814|AT2B2_HUMAN Plasma membrane calcium-transporting ATPase 2 OS=Homo sapiens OX=9606 GN=ATP2B2 PE=1 SV=2	29.4007	30.0899	30.4777	29.7613	28.7915	30.6294	30.9626	30.0164
ATP2B3	Q16720	Plasma membrane calcium-transporting ATPase 3	sp|Q16720|AT2B3_HUMAN Plasma membrane calcium-transporting ATPase 3 OS=Homo sapiens OX=9606 GN=ATP2B3 PE=1 SV=3	27.7378	27.8315	27.6047	27.1586	27.3239	27.2541	26.3363	27.3338
ATP2B4	P23634	Plasma membrane calcium-transporting ATPase 4	sp|P23634|AT2B4_HUMAN Plasma membrane calcium-transporting ATPase 4 OS=Homo sapiens OX=9606 GN=ATP2B4 PE=1 SV=2	28.3028	28.575	28.7968	28.3065	28.2896	28.893	26.9544	28.8958
ATP2C1	P98194	Calcium-transporting ATPase type 2C member 1	sp|P98194|AT2C1_HUMAN Calcium-transporting ATPase type 2C member 1 OS=Homo sapiens OX=9606 GN=ATP2C1 PE=1 SV=3	22.9963	23.6296	23.3705	23.1716	23.8912	23.73	23.5394	23.4842
ATP5A1	P25705	ATP synthase subunit alpha, mitochondrial	sp|P25705|ATPA_HUMAN ATP synthase subunit alpha, mitochondrial OS=Homo sapiens OX=9606 GN=ATP5F1A PE=1 SV=1	33.7477	33.3536	33.3837	33.3679	33.7775	33.8165	34.2442	33.7531
ATP5B	P06576	ATP synthase subunit beta, mitochondrial	sp|P06576|ATPB_HUMAN ATP synthase subunit beta, mitochondrial OS=Homo sapiens OX=9606 GN=ATP5F1B PE=1 SV=3	33.2483	33.0231	32.984	32.832	32.2678	32.5531	33.4593	32.5288
ATP5C1	P36542	ATP synthase subunit gamma, mitochondrial	sp|P36542|ATPG_HUMAN ATP synthase subunit gamma, mitochondrial OS=Homo sapiens OX=9606 GN=ATP5F1C PE=1 SV=1	30.2581	30.0013	29.9995	30.1695	30.2826	30.1258	30.4593	30.4038
ATP5D	P30049	ATP synthase subunit delta, mitochondrial	sp|P30049|ATPD_HUMAN ATP synthase subunit delta, mitochondrial OS=Homo sapiens OX=9606 GN=ATP5F1D PE=1 SV=2	28.6561	28.5097	28.4792	28.188	27.5165	27.2372	28.0217	27.1343
ATP5E	P56381	ATP synthase subunit epsilon, mitochondrial;ATP synthase subunit epsilon-like protein, mitochondrial	sp|P56381|ATP5E_HUMAN ATP synthase subunit epsilon, mitochondrial OS=Homo sapiens OX=9606 GN=ATP5F1E PE=1 SV=2;sp|Q5VTU8|AT5EL_HUMAN ATP synthase subunit epsilon-like protein, mitochondrial OS=Homo sapiens OX=9606 GN=ATP5F1EP2 PE=1 SV=1	26.7274	26.0717	26.0764	25.4777	24.5154	23.5636	25.8637	25.5188
ATP5F1	P24539	ATP synthase F(0) complex subunit B1, mitochondrial	sp|P24539|AT5F1_HUMAN ATP synthase F(0) complex subunit B1, mitochondrial OS=Homo sapiens OX=9606 GN=ATP5PB PE=1 SV=2	29.7704	29.4897	29.4645	29.7081	29.9546	30.0441	29.6846	29.7957
ATP5H	O75947	ATP synthase subunit d, mitochondrial	sp|O75947|ATP5H_HUMAN ATP synthase subunit d, mitochondrial OS=Homo sapiens OX=9606 GN=ATP5PD PE=1 SV=3	30.0237	29.7585	29.8861	29.7604	28.7371	28.9856	30.1467	29.9615
ATP5I	P56385	ATP synthase subunit e, mitochondrial	sp|P56385|ATP5I_HUMAN ATP synthase subunit e, mitochondrial OS=Homo sapiens OX=9606 GN=ATP5ME PE=1 SV=2	28.2902	28.0577	28.3856	28.2909	28.6941	27.6339	28.3418	29.5367
ATP5J	P18859	ATP synthase-coupling factor 6, mitochondrial	sp|P18859|ATP5J_HUMAN ATP synthase-coupling factor 6, mitochondrial OS=Homo sapiens OX=9606 GN=ATP5PF PE=1 SV=1	25.4389	25.9205	26.1435	27.9427	23.6593	23.0971	25.1393	27.1534
ATP5J2	P56134	ATP synthase subunit f, mitochondrial	sp|P56134|ATPK_HUMAN ATP synthase subunit f, mitochondrial OS=Homo sapiens OX=9606 GN=ATP5MF PE=1 SV=3	27.5116	27.6508	27.4004	27.383	27.7205	27.1391	28.157	26.649
ATP5L	O75964	ATP synthase subunit g, mitochondrial	sp|O75964|ATP5L_HUMAN ATP synthase subunit g, mitochondrial OS=Homo sapiens OX=9606 GN=ATP5MG PE=1 SV=3	29.4703	29.0089	28.904	28.9532	29.7226	29.4411	29.1496	29.4774
ATP5O	P48047	ATP synthase subunit O, mitochondrial	sp|P48047|ATPO_HUMAN ATP synthase subunit O, mitochondrial OS=Homo sapiens OX=9606 GN=ATP5PO PE=1 SV=1	30.0439	30.2108	30.295	30.2172	28.1901	28.7099	29.8185	29.158
ATP5S	Q99766	ATP synthase subunit s, mitochondrial	sp|Q99766|ATP5S_HUMAN ATP synthase subunit s, mitochondrial OS=Homo sapiens OX=9606 GN=DMAC2L PE=1 SV=3	25.4558	25.7547	25.3037	25.6586	24.8879	25.185	25.5581	24.3171
ATP6AP1	Q15904	V-type proton ATPase subunit S1	sp|Q15904|VAS1_HUMAN V-type proton ATPase subunit S1 OS=Homo sapiens OX=9606 GN=ATP6AP1 PE=1 SV=2	27.8199	27.969	27.2424	27.5341	27.5491	27.7101	28.5224	27.6346
ATP6AP2	O75787	Renin receptor	sp|O75787|RENR_HUMAN Renin receptor OS=Homo sapiens OX=9606 GN=ATP6AP2 PE=1 SV=2	24.061	23.7209	24.4184	24.3588	24.4665	24.9457	24.889	NA
ATP6V0A1	Q93050	V-type proton ATPase 116 kDa subunit a isoform 1	sp|Q93050|VPP1_HUMAN V-type proton ATPase 116 kDa subunit a isoform 1 OS=Homo sapiens OX=9606 GN=ATP6V0A1 PE=1 SV=3	30.3452	30.0576	30.2383	29.8398	30.5751	30.9121	30.4158	30.5029
ATP6V0C	P27449	V-type proton ATPase 16 kDa proteolipid subunit	sp|P27449|VATL_HUMAN V-type proton ATPase 16 kDa proteolipid subunit OS=Homo sapiens OX=9606 GN=ATP6V0C PE=1 SV=1	29.343	28.884	29.032	27.388	27.7633	29.9188	28.3511	29.1761
ATP6V0D1	P61421	V-type proton ATPase subunit d 1	sp|P61421|VA0D1_HUMAN V-type proton ATPase subunit d 1 OS=Homo sapiens OX=9606 GN=ATP6V0D1 PE=1 SV=1	29.055	29.0348	29.0096	28.8545	28.8404	29.3796	28.8154	28.6119
ATP6V0D2	Q8N8Y2	V-type proton ATPase subunit d 2	sp|Q8N8Y2|VA0D2_HUMAN V-type proton ATPase subunit d 2 OS=Homo sapiens OX=9606 GN=ATP6V0D2 PE=2 SV=1	25.9566	25.9113	25.7595	25.6315	25.9757	26.0683	26.0973	25.9211
ATP6V1A	P38606	V-type proton ATPase catalytic subunit A	sp|P38606|VATA_HUMAN V-type proton ATPase catalytic subunit A OS=Homo sapiens OX=9606 GN=ATP6V1A PE=1 SV=2	30.951	30.8198	30.8513	30.8769	29.5692	30.4163	30.4712	29.9411
ATP6V1B2	P21281	V-type proton ATPase subunit B, brain isoform	sp|P21281|VATB2_HUMAN V-type proton ATPase subunit B, brain isoform OS=Homo sapiens OX=9606 GN=ATP6V1B2 PE=1 SV=3	30.3054	30.3667	30.3986	30.2961	27.6385	28.8066	28.6711	28.6019
ATP6V1C1	P21283	V-type proton ATPase subunit C 1	sp|P21283|VATC1_HUMAN V-type proton ATPase subunit C 1 OS=Homo sapiens OX=9606 GN=ATP6V1C1 PE=1 SV=4	29.261	29.4519	29.331	29.2257	28.2937	29.2745	29.0622	28.1158
ATP6V1D	Q9Y5K8	V-type proton ATPase subunit D	sp|Q9Y5K8|VATD_HUMAN V-type proton ATPase subunit D OS=Homo sapiens OX=9606 GN=ATP6V1D PE=1 SV=1	28.7634	28.5771	28.8452	28.5009	27.1541	27.4921	28.4595	27.8834
ATP6V1E1	P36543	V-type proton ATPase subunit E 1	sp|P36543|VATE1_HUMAN V-type proton ATPase subunit E 1 OS=Homo sapiens OX=9606 GN=ATP6V1E1 PE=1 SV=1	29.6421	29.6506	29.8405	29.8463	27.7512	28.3218	28.563	28.9385
ATP6V1F	Q16864	V-type proton ATPase subunit F	sp|Q16864|VATF_HUMAN V-type proton ATPase subunit F OS=Homo sapiens OX=9606 GN=ATP6V1F PE=1 SV=2	26.9892	26.6352	26.4411	26.2425	25.9363	26.1129	27.3687	25.6125
ATP6V1G1	O75348	V-type proton ATPase subunit G 1	sp|O75348|VATG1_HUMAN V-type proton ATPase subunit G 1 OS=Homo sapiens OX=9606 GN=ATP6V1G1 PE=1 SV=3	23.3328	23.426	23.6584	23.4941	NA	NA	22.4196	NA
ATP6V1G2	O95670	V-type proton ATPase subunit G 2	sp|O95670|VATG2_HUMAN V-type proton ATPase subunit G 2 OS=Homo sapiens OX=9606 GN=ATP6V1G2 PE=1 SV=1	25.2511	25.0206	26.1165	26.2057	NA	NA	25.187	25.3988
ATP6V1H	Q9UI12	V-type proton ATPase subunit H	sp|Q9UI12|VATH_HUMAN V-type proton ATPase subunit H OS=Homo sapiens OX=9606 GN=ATP6V1H PE=1 SV=1	29.2147	29.134	29.1498	28.858	28.3575	28.7411	28.5175	27.7611
ATP8A1	Q9Y2Q0	Phospholipid-transporting ATPase IA	sp|Q9Y2Q0|AT8A1_HUMAN Phospholipid-transporting ATPase IA OS=Homo sapiens OX=9606 GN=ATP8A1 PE=1 SV=1	27.7984	27.3473	27.5968	27.4584	27.2063	27.4684	25.3068	27.6735
ATP8A2	Q9NTI2	Phospholipid-transporting ATPase IB	sp|Q9NTI2|AT8A2_HUMAN Phospholipid-transporting ATPase IB OS=Homo sapiens OX=9606 GN=ATP8A2 PE=1 SV=3	NA	21.9983	21.955	22.0288	22.7658	22.1415	22.3787	22.3158
ATP9A	O75110	Probable phospholipid-transporting ATPase IIA	sp|O75110|ATP9A_HUMAN Probable phospholipid-transporting ATPase IIA OS=Homo sapiens OX=9606 GN=ATP9A PE=1 SV=3	24.1815	24.3467	24.5659	24.3437	24.1501	23.8974	23.7139	22.8102
ATPAF1	Q5TC12	ATP synthase mitochondrial F1 complex assembly factor 1	sp|Q5TC12|ATPF1_HUMAN ATP synthase mitochondrial F1 complex assembly factor 1 OS=Homo sapiens OX=9606 GN=ATPAF1 PE=1 SV=1	24.6921	24.7889	24.9905	24.9613	25.2469	24.4961	23.2584	24.8139
ATPAF2	Q8N5M1	ATP synthase mitochondrial F1 complex assembly factor 2	sp|Q8N5M1|ATPF2_HUMAN ATP synthase mitochondrial F1 complex assembly factor 2 OS=Homo sapiens OX=9606 GN=ATPAF2 PE=1 SV=1	NA	21.2936	21.2139	NA	NA	NA	NA	NA
ATPIF1	Q9UII2	ATPase inhibitor, mitochondrial	sp|Q9UII2|ATIF1_HUMAN ATPase inhibitor, mitochondrial OS=Homo sapiens OX=9606 GN=ATP5IF1 PE=1 SV=1	27.7624	27.0942	27.5993	26.5538	26.5051	26.4706	24.4688	26.2122
ATXN10	Q9UBB4	Ataxin-10	sp|Q9UBB4|ATX10_HUMAN Ataxin-10 OS=Homo sapiens OX=9606 GN=ATXN10 PE=1 SV=1	24.784	25.0498	25.209	25.2231	24.1259	24.6944	25.4831	23.473
ATXN2	Q99700	Ataxin-2	sp|Q99700|ATX2_HUMAN Ataxin-2 OS=Homo sapiens OX=9606 GN=ATXN2 PE=1 SV=2	NA	NA	22.5799	NA	NA	NA	NA	NA
ATXN2L	Q8WWM7	Ataxin-2-like protein	sp|Q8WWM7|ATX2L_HUMAN Ataxin-2-like protein OS=Homo sapiens OX=9606 GN=ATXN2L PE=1 SV=2	24.0923	24.0965	24.2633	24.3537	24.9526	23.7209	24.8302	23.5774
ATXN3	P54252	Ataxin-3	sp|P54252|ATX3_HUMAN Ataxin-3 OS=Homo sapiens OX=9606 GN=ATXN3 PE=1 SV=5	NA	NA	23.173	23.1549	NA	23.0114	NA	NA
AUH	Q13825	Methylglutaconyl-CoA hydratase, mitochondrial	sp|Q13825|AUHM_HUMAN Methylglutaconyl-CoA hydratase, mitochondrial OS=Homo sapiens OX=9606 GN=AUH PE=1 SV=1	25.668	25.452	25.2613	25.543	NA	24.5058	25.1868	24.0453
AVIL	O75366	Advillin	sp|O75366|AVIL_HUMAN Advillin OS=Homo sapiens OX=9606 GN=AVIL PE=1 SV=3	NA	NA	20.9728	NA	NA	NA	23.3711	22.3553
AVL9	Q8NBF6	Late secretory pathway protein AVL9 homolog	sp|Q8NBF6|AVL9_HUMAN Late secretory pathway protein AVL9 homolog OS=Homo sapiens OX=9606 GN=AVL9 PE=1 SV=1	24.6986	24.1891	25.5003	24.4033	25.4649	26.1076	22.5192	NA
B4GAT1	O43505	Beta-1,4-glucuronyltransferase 1	sp|O43505|B4GA1_HUMAN Beta-1,4-glucuronyltransferase 1 OS=Homo sapiens OX=9606 GN=B4GAT1 PE=1 SV=1	22.9163	22.2544	22.484	NA	23.4303	22.9108	NA	22.9873
BAALC	Q8WXS3	Brain and acute leukemia cytoplasmic protein	sp|Q8WXS3|BAALC_HUMAN Brain and acute leukemia cytoplasmic protein OS=Homo sapiens OX=9606 GN=BAALC PE=2 SV=3	NA	NA	NA	21.46	NA	NA	NA	NA
BABAM1	Q9NWV8	BRISC and BRCA1-A complex member 1	sp|Q9NWV8|BABA1_HUMAN BRISC and BRCA1-A complex member 1 OS=Homo sapiens OX=9606 GN=BABAM1 PE=1 SV=1	22.8724	22.9451	NA	NA	NA	NA	NA	NA
BAG2	O95816	BAG family molecular chaperone regulator 2	sp|O95816|BAG2_HUMAN BAG family molecular chaperone regulator 2 OS=Homo sapiens OX=9606 GN=BAG2 PE=1 SV=1	22.4313	NA	22.4791	22.4468	22.5185	22.2008	NA	22.7557
BAG3	O95817	BAG family molecular chaperone regulator 3	sp|O95817|BAG3_HUMAN BAG family molecular chaperone regulator 3 OS=Homo sapiens OX=9606 GN=BAG3 PE=1 SV=3	23.766	NA	23.4501	23.3292	NA	NA	NA	24.1088
BAG5	Q9UL15	BAG family molecular chaperone regulator 5	sp|Q9UL15|BAG5_HUMAN BAG family molecular chaperone regulator 5 OS=Homo sapiens OX=9606 GN=BAG5 PE=1 SV=1	23.5492	24.1729	24.1464	24.2419	NA	24.0731	24.6832	24.192
BAG6	P46379	Large proline-rich protein BAG6	sp|P46379|BAG6_HUMAN Large proline-rich protein BAG6 OS=Homo sapiens OX=9606 GN=BAG6 PE=1 SV=2	25.8495	25.8199	25.7558	25.4536	26.3438	26.0308	26.3936	26.4722
BAI1	O14514	Brain-specific angiogenesis inhibitor 1	sp|O14514|AGRB1_HUMAN Adhesion G protein-coupled receptor B1 OS=Homo sapiens OX=9606 GN=ADGRB1 PE=1 SV=2	22.3623	22.2622	NA	NA	22.4637	22.4469	22.4216	NA
BAI2	O60241	Brain-specific angiogenesis inhibitor 2	sp|O60241|AGRB2_HUMAN Adhesion G protein-coupled receptor B2 OS=Homo sapiens OX=9606 GN=ADGRB2 PE=1 SV=2	NA	22.3721	NA	NA	22.3292	22.9914	24.2103	23.2325
BAI3	O60242	Brain-specific angiogenesis inhibitor 3	sp|O60242|AGRB3_HUMAN Adhesion G protein-coupled receptor B3 OS=Homo sapiens OX=9606 GN=ADGRB3 PE=1 SV=2	23.2386	23.0612	23.202	23.1388	NA	24.1216	24.1913	23.7767
BAIAP2	Q9UQB8	Brain-specific angiogenesis inhibitor 1-associated protein 2	sp|Q9UQB8|BAIP2_HUMAN Brain-specific angiogenesis inhibitor 1-associated protein 2 OS=Homo sapiens OX=9606 GN=BAIAP2 PE=1 SV=1	28.7283	28.471	28.6428	28.0764	28.1087	29.0087	29.8192	28.8281
BANF1	O75531	Barrier-to-autointegration factor;Barrier-to-autointegration factor, N-terminally processed	sp|O75531|BAF_HUMAN Barrier-to-autointegration factor OS=Homo sapiens OX=9606 GN=BANF1 PE=1 SV=1	23.6458	24.0331	23.8976	23.357	23.3176	22.5099	22.521	24.5484
BASP1	P80723	Brain acid soluble protein 1	sp|P80723|BASP1_HUMAN Brain acid soluble protein 1 OS=Homo sapiens OX=9606 GN=BASP1 PE=1 SV=2	30.7074	30.8928	30.7182	33.0097	27.3737	27.3813	25.301	27.0947
BAX	Q07812	Apoptosis regulator BAX	sp|Q07812|BAX_HUMAN Apoptosis regulator BAX OS=Homo sapiens OX=9606 GN=BAX PE=1 SV=1	NA	NA	NA	23.0346	NA	NA	NA	NA
BBOX1	O75936	Gamma-butyrobetaine dioxygenase	sp|O75936|BODG_HUMAN Gamma-butyrobetaine dioxygenase OS=Homo sapiens OX=9606 GN=BBOX1 PE=1 SV=1	NA	23.5181	NA	23.8762	NA	NA	NA	NA
BCAN	Q96GW7	Brevican core protein	sp|Q96GW7|PGCB_HUMAN Brevican core protein OS=Homo sapiens OX=9606 GN=BCAN PE=1 SV=2	30.8136	30.559	30.457	30.7209	29.3218	30.4012	31.0486	31.3884
BCAP31	P51572	B-cell receptor-associated protein 31	sp|P51572|BAP31_HUMAN B-cell receptor-associated protein 31 OS=Homo sapiens OX=9606 GN=BCAP31 PE=1 SV=3	26.814	26.6193	26.9222	26.4384	27.875	26.8582	25.4548	26.2739
BCAS1	O75363	Breast carcinoma-amplified sequence 1	sp|O75363|BCAS1_HUMAN Breast carcinoma-amplified sequence 1 OS=Homo sapiens OX=9606 GN=BCAS1 PE=1 SV=2	24.732	25.7802	25.9689	27.0867	25.4045	23.7143	24.0566	22.7008
BCAS3	Q9H6U6	Breast carcinoma-amplified sequence 3	sp|Q9H6U6|BCAS3_HUMAN Breast carcinoma-amplified sequence 3 OS=Homo sapiens OX=9606 GN=BCAS3 PE=1 SV=3	24.4991	24.3386	24.3966	24.4578	24.6406	25.1567	24.1208	24.8978
BCKDHA	P12694	2-oxoisovalerate dehydrogenase subunit alpha, mitochondrial	sp|P12694|ODBA_HUMAN 2-oxoisovalerate dehydrogenase subunit alpha, mitochondrial OS=Homo sapiens OX=9606 GN=BCKDHA PE=1 SV=2	NA	23.6922	23.4701	24.0848	NA	NA	NA	NA
BCKDK	O14874	[3-methyl-2-oxobutanoate dehydrogenase [lipoamide]] kinase, mitochondrial	sp|O14874|BCKD_HUMAN [3-methyl-2-oxobutanoate dehydrogenase [lipoamide]] kinase, mitochondrial OS=Homo sapiens OX=9606 GN=BCKDK PE=1 SV=2	24.4541	23.4919	23.5691	23.6352	NA	NA	NA	NA
BCL2L13	Q9BXK5	Bcl-2-like protein 13	sp|Q9BXK5|B2L13_HUMAN Bcl-2-like protein 13 OS=Homo sapiens OX=9606 GN=BCL2L13 PE=1 SV=1	25.9177	25.7755	25.9441	25.6453	26.1544	24.3093	25.3406	24.476
BCLAF1	Q9NYF8	Bcl-2-associated transcription factor 1	sp|Q9NYF8|BCLF1_HUMAN Bcl-2-associated transcription factor 1 OS=Homo sapiens OX=9606 GN=BCLAF1 PE=1 SV=2	23.0196	NA	22.8933	NA	24.8788	23.7199	24.2589	24.5604
BCR	P11274	Breakpoint cluster region protein	sp|P11274|BCR_HUMAN Breakpoint cluster region protein OS=Homo sapiens OX=9606 GN=BCR PE=1 SV=2	24.5558	23.9299	24.1565	24.0092	24.2935	24.3083	24.6623	25.245
BCS1L	Q9Y276	Mitochondrial chaperone BCS1	sp|Q9Y276|BCS1_HUMAN Mitochondrial chaperone BCS1 OS=Homo sapiens OX=9606 GN=BCS1L PE=1 SV=1	23.7919	23.6362	NA	23.6027	24.0754	23.8145	24.3176	NA
BDH1	Q02338	D-beta-hydroxybutyrate dehydrogenase, mitochondrial	sp|Q02338|BDH_HUMAN D-beta-hydroxybutyrate dehydrogenase, mitochondrial OS=Homo sapiens OX=9606 GN=BDH1 PE=1 SV=3	26.9103	26.7969	27.1349	26.6291	25.881	25.7815	26.5405	26.6377
BDH2	Q9BUT1	3-hydroxybutyrate dehydrogenase type 2	sp|Q9BUT1|BDH2_HUMAN 3-hydroxybutyrate dehydrogenase type 2 OS=Homo sapiens OX=9606 GN=BDH2 PE=1 SV=2	24.7876	25.5124	25.139	25.5317	25.2254	24.5157	24.6099	24.2591
BEGAIN	Q9BUH8	Brain-enriched guanylate kinase-associated protein	sp|Q9BUH8|BEGIN_HUMAN Brain-enriched guanylate kinase-associated protein OS=Homo sapiens OX=9606 GN=BEGAIN PE=1 SV=1	NA	NA	NA	NA	22.9287	22.9777	NA	NA
BGN	P21810	Biglycan	sp|P21810|PGS1_HUMAN Biglycan OS=Homo sapiens OX=9606 GN=BGN PE=1 SV=2	NA	NA	NA	NA	23.3565	22.4316	NA	NA
BIN1	O00499	Myc box-dependent-interacting protein 1	sp|O00499|BIN1_HUMAN Myc box-dependent-interacting protein 1 OS=Homo sapiens OX=9606 GN=BIN1 PE=1 SV=1	28.5693	28.6703	28.9076	29.1274	27.2922	27.7693	28.9295	27.2175
BLMH	Q13867	Bleomycin hydrolase	sp|Q13867|BLMH_HUMAN Bleomycin hydrolase OS=Homo sapiens OX=9606 GN=BLMH PE=1 SV=1	NA	21.8816	22.569	22.7889	NA	NA	NA	NA
BLOC1S2	Q6QNY1	Biogenesis of lysosome-related organelles complex 1 subunit 2	sp|Q6QNY1|BL1S2_HUMAN Biogenesis of lysosome-related organelles complex 1 subunit 2 OS=Homo sapiens OX=9606 GN=BLOC1S2 PE=1 SV=1	NA	NA	22.0553	22.7758	NA	NA	NA	NA
BLVRA	P53004	Biliverdin reductase A	sp|P53004|BIEA_HUMAN Biliverdin reductase A OS=Homo sapiens OX=9606 GN=BLVRA PE=1 SV=2	25.1778	25.3683	25.0524	25.5085	23.8149	24.1773	24.4541	NA
BLVRB	P30043	Flavin reductase (NADPH)	sp|P30043|BLVRB_HUMAN Flavin reductase (NADPH) OS=Homo sapiens OX=9606 GN=BLVRB PE=1 SV=3	24.1312	24.5446	23.8823	25.3724	25.3857	25.1372	25.3352	25.3066
BOLA2	Q9H3K6	BolA-like protein 2	sp|Q9H3K6|BOLA2_HUMAN BolA-like protein 2 OS=Homo sapiens OX=9606 GN=BOLA2 PE=1 SV=1	NA	22.4097	NA	NA	23.296	23.2467	23.9986	22.7198
BPHL	Q86WA6	Valacyclovir hydrolase	sp|Q86WA6|BPHL_HUMAN Valacyclovir hydrolase OS=Homo sapiens OX=9606 GN=BPHL PE=1 SV=1	23.8967	23.4854	23.7634	22.4295	NA	NA	22.5202	22.4075
BPNT1	O95861	3(2),5-bisphosphate nucleotidase 1	sp|O95861|BPNT1_HUMAN 3(2),5-bisphosphate nucleotidase 1 OS=Homo sapiens OX=9606 GN=BPNT1 PE=1 SV=1	24.878	24.6669	24.2002	24.9249	23.1669	23.9141	25.047	NA
BRAF	P15056	Serine/threonine-protein kinase B-raf	sp|P15056|BRAF_HUMAN Serine/threonine-protein kinase B-raf OS=Homo sapiens OX=9606 GN=BRAF PE=1 SV=4	24.4125	24.2696	23.9687	24.7348	25.0028	24.2641	23.9346	24.3774
BRE	Q9NXR7	BRCA1-A complex subunit BRE	sp|Q9NXR7|BABA2_HUMAN BRISC and BRCA1-A complex member 2 OS=Homo sapiens OX=9606 GN=BABAM2 PE=1 SV=2	NA	22.5931	23.148	22.9142	NA	22.0005	23.0642	NA
BRI3BP	Q8WY22	BRI3-binding protein	sp|Q8WY22|BRI3B_HUMAN BRI3-binding protein OS=Homo sapiens OX=9606 GN=BRI3BP PE=1 SV=1	23.081	23.2109	22.5079	NA	NA	23.5901	23.8831	NA
BRINP1	O60477	BMP/retinoic acid-inducible neural-specific protein 1	sp|O60477|BRNP1_HUMAN BMP/retinoic acid-inducible neural-specific protein 1 OS=Homo sapiens OX=9606 GN=BRINP1 PE=1 SV=2	NA	22.6792	22.6034	22.1079	22.9189	23.0118	22.8155	22.5289
BRK1	Q8WUW1	Protein BRICK1	sp|Q8WUW1|BRK1_HUMAN Protein BRICK1 OS=Homo sapiens OX=9606 GN=BRK1 PE=1 SV=1	26.1926	25.9677	26.2525	26.4275	25.6735	26.285	26.5264	26.7491
BROX	Q5VW32	BRO1 domain-containing protein BROX	sp|Q5VW32|BROX_HUMAN BRO1 domain-containing protein BROX OS=Homo sapiens OX=9606 GN=BROX PE=1 SV=1	23.5152	23.4299	23.7199	23.9143	NA	NA	NA	NA
BRSK1	Q8TDC3	Serine/threonine-protein kinase BRSK1	sp|Q8TDC3|BRSK1_HUMAN Serine/threonine-protein kinase BRSK1 OS=Homo sapiens OX=9606 GN=BRSK1 PE=1 SV=2	25.1983	25.1749	25.2193	25.1849	24.8452	25.2659	26.0174	25.5174
BRSK2	Q8IWQ3	Serine/threonine-protein kinase BRSK2	sp|Q8IWQ3|BRSK2_HUMAN Serine/threonine-protein kinase BRSK2 OS=Homo sapiens OX=9606 GN=BRSK2 PE=1 SV=3	25.2096	25.189	25.2881	25.2412	25.707	25.5577	25.7372	25.9233
BSG	P35613	Basigin	sp|P35613|BASI_HUMAN Basigin OS=Homo sapiens OX=9606 GN=BSG PE=1 SV=2	26.2584	26.5125	25.513	27.0696	25.4684	26.6803	25.9306	24.1201
BSN	Q9UPA5	Protein bassoon	sp|Q9UPA5|BSN_HUMAN Protein bassoon OS=Homo sapiens OX=9606 GN=BSN PE=1 SV=4	30.0669	29.8098	30.1039	29.5457	29.723	30.5135	30.3025	29.9485
BTN3A3	O00478	Butyrophilin subfamily 3 member A3;Butyrophilin subfamily 3 member A2;Butyrophilin subfamily 3 member A1	sp|O00478|BT3A3_HUMAN Butyrophilin subfamily 3 member A3 OS=Homo sapiens OX=9606 GN=BTN3A3 PE=1 SV=1;sp|P78410|BT3A2_HUMAN Butyrophilin subfamily 3 member A2 OS=Homo sapiens OX=9606 GN=BTN3A2 PE=1 SV=2;sp|O00481|BT3A1_HUMAN Butyrophilin subfamily 3 member	NA	NA	NA	NA	NA	22.7112	NA	NA
BZW1	Q7L1Q6	Basic leucine zipper and W2 domain-containing protein 1	sp|Q7L1Q6|BZW1_HUMAN Basic leucine zipper and W2 domain-containing protein 1 OS=Homo sapiens OX=9606 GN=BZW1 PE=1 SV=1	24.126	24.5337	24.7624	24.7179	24.5372	24.4709	24.4906	24.2811
BZW2	Q9Y6E2	Basic leucine zipper and W2 domain-containing protein 2	sp|Q9Y6E2|BZW2_HUMAN Basic leucine zipper and W2 domain-containing protein 2 OS=Homo sapiens OX=9606 GN=BZW2 PE=1 SV=1	21.6755	22.0089	22.6175	21.8897	NA	21.9384	NA	NA
C12orf10	Q9HB07	UPF0160 protein MYG1, mitochondrial	sp|Q9HB07|MYG1_HUMAN UPF0160 protein MYG1, mitochondrial OS=Homo sapiens OX=9606 GN=C12orf10 PE=1 SV=2	NA	NA	NA	24.5497	NA	NA	NA	NA
C12orf57	Q99622	Protein C10	sp|Q99622|C10_HUMAN Protein C10 OS=Homo sapiens OX=9606 GN=C12orf57 PE=1 SV=1	24.1018	NA	NA	22.9152	25.055	24.3907	25.9118	25.5871
C14orf159	Q7Z3D6	UPF0317 protein C14orf159, mitochondrial	sp|Q7Z3D6|GLUCM_HUMAN D-glutamate cyclase, mitochondrial OS=Homo sapiens OX=9606 GN=DGLUCY PE=1 SV=2	NA	25.748	25.9265	25.208	NA	25.2759	25.9484	23.4396
C14orf166	Q9Y224	UPF0568 protein C14orf166	sp|Q9Y224|RTRAF_HUMAN RNA transcription, translation and transport factor protein OS=Homo sapiens OX=9606 GN=RTRAF PE=1 SV=1	24.5126	25.0132	25.335	25.395	23.1665	24.0155	24.3176	NA
C16orf45	Q96MC5	Uncharacterized protein C16orf45	sp|Q96MC5|MERB1_HUMAN bMERB domain-containing protein 1 OS=Homo sapiens OX=9606 GN=BMERB1 PE=1 SV=1	NA	NA	NA	NA	23.0476	NA	NA	NA
C16orf70	Q9BSU1	UPF0183 protein C16orf70	sp|Q9BSU1|CP070_HUMAN UPF0183 protein C16orf70 OS=Homo sapiens OX=9606 GN=C16orf70 PE=1 SV=1	22.1296	22.5708	22.0239	22.5665	NA	NA	NA	NA
C19orf52	Q9BSF4	Uncharacterized protein C19orf52	sp|Q9BSF4|TIM29_HUMAN Mitochondrial import inner membrane translocase subunit Tim29 OS=Homo sapiens OX=9606 GN=TIMM29 PE=1 SV=2	22.7168	22.3757	22.5683	NA	24.3584	23.7568	21.3121	22.82
C1orf198	Q9H425	Uncharacterized protein C1orf198	sp|Q9H425|CA198_HUMAN Uncharacterized protein C1orf198 OS=Homo sapiens OX=9606 GN=C1orf198 PE=1 SV=1	23.6465	23.5241	23.792	24.3624	24.3302	22.6247	NA	NA
C1orf95	Q69YW2	Protein stum homolog	sp|Q69YW2|STUM_HUMAN Protein stum homolog OS=Homo sapiens OX=9606 GN=STUM PE=2 SV=1	25.2658	25.4434	25.1167	25.0993	NA	25.9973	26.5318	25.1152
C1QB	P02746	Complement C1q subcomponent subunit B	sp|P02746|C1QB_HUMAN Complement C1q subcomponent subunit B OS=Homo sapiens OX=9606 GN=C1QB PE=1 SV=3	NA	24.0612	23.5365	22.8201	25.0704	24.1815	NA	24.0763
C1QBP	Q07021	Complement component 1 Q subcomponent-binding protein, mitochondrial	sp|Q07021|C1QBP_HUMAN Complement component 1 Q subcomponent-binding protein, mitochondrial OS=Homo sapiens OX=9606 GN=C1QBP PE=1 SV=1	27.592	27.8397	28.0368	26.7332	26.1371	25.4768	26.7886	27.4654
C2CD2L	O14523	C2 domain-containing protein 2-like	sp|O14523|C2C2L_HUMAN Phospholipid transfer protein C2CD2L OS=Homo sapiens OX=9606 GN=C2CD2L PE=1 SV=3	24.9203	24.8839	25.3461	25.2028	25.0162	24.9273	25.2296	25.5525
C2CD4C	Q8TF44	C2 calcium-dependent domain-containing protein 4C	sp|Q8TF44|C2C4C_HUMAN C2 calcium-dependent domain-containing protein 4C OS=Homo sapiens OX=9606 GN=C2CD4C PE=1 SV=2	24.8516	24.3852	24.1905	24.0575	26.7325	25.1501	NA	25.3682
C2CD5	Q86YS7	C2 domain-containing protein 5	sp|Q86YS7|C2CD5_HUMAN C2 domain-containing protein 5 OS=Homo sapiens OX=9606 GN=C2CD5 PE=1 SV=1	24.2938	24.2845	24.5306	24.3346	23.6884	24.1734	24.4065	24.2232
C2orf47	Q8WWC4	Uncharacterized protein C2orf47, mitochondrial	sp|Q8WWC4|MAIP1_HUMAN m-AAA protease-interacting protein 1, mitochondrial OS=Homo sapiens OX=9606 GN=MAIP1 PE=1 SV=1	23.3333	23.6943	23.6302	23.6263	22.8417	23.2683	23.2049	22.6196
C3	P01024	Complement C3;Complement C3 beta chain;C3-beta-c;Complement C3 alpha chain;C3a anaphylatoxin;Acylation stimulating protein;Complement C3b alpha chain;Complement C3c alpha chain fragment 1;Complement C3dg fragment;Complement C3g fragment;Complement C3d fragment;Complement C3f fragment;Complement C3c alpha chain fragment 2	#VALUE!	#VALUE!	#VALUE!	#VALUE!	#VALUE!	#VALUE!	#VALUE!	#VALUE!	#VALUE!
C4B	P0C0L5	Complement C4-B;Complement C4 beta chain;Complement C4-B alpha chain;C4a anaphylatoxin;C4b-B;C4d-B;Complement C4 gamma chain;Complement C4-A;Complement C4 beta chain;Complement C4-A alpha chain;C4a anaphylatoxin;C4b-A;C4d-A;Complement C4 gamma chain	sp|P0C0L5|CO4B_HUMAN Complement C4-B OS=Homo sapiens OX=9606 GN=C4B PE=1 SV=2;sp|P0C0L4|CO4A_HUMAN Complement C4-A OS=Homo sapiens OX=9606 GN=C4A PE=1 SV=2	23.4862	24.6577	NA	24.5899	25.0375	24.3847	24.9121	NA
C9orf172	C9J069	Uncharacterized protein C9orf172	sp|C9J069|AJM1_HUMAN Apical junction component 1 homolog OS=Homo sapiens OX=9606 GN=AJM1 PE=3 SV=1	23.7333	23.7127	23.6593	NA	22.7781	24.7188	24.4487	25.0536
C9orf64	Q5T6V5	UPF0553 protein C9orf64	sp|Q5T6V5|QSPP_HUMAN Queuosine salvage protein OS=Homo sapiens OX=9606 GN=C9orf64 PE=1 SV=1	23.1854	23.1676	23.3712	23.2017	NA	22.7765	22.8638	NA
CA1	P00915	Carbonic anhydrase 1	sp|P00915|CAH1_HUMAN Carbonic anhydrase 1 OS=Homo sapiens OX=9606 GN=CA1 PE=1 SV=2	23.7299	23.6269	NA	24.2741	23.1448	23.3198	23.4696	NA
CA14	Q9ULX7	Carbonic anhydrase 14	sp|Q9ULX7|CAH14_HUMAN Carbonic anhydrase 14 OS=Homo sapiens OX=9606 GN=CA14 PE=1 SV=1	NA	23.1755	22.9057	23.5323	NA	NA	NA	NA
CA2	P00918	Carbonic anhydrase 2	sp|P00918|CAH2_HUMAN Carbonic anhydrase 2 OS=Homo sapiens OX=9606 GN=CA2 PE=1 SV=2	28.6881	29.4516	29.1367	29.4172	26.8811	26.4143	27.084	25.642
CA4	P22748	Carbonic anhydrase 4	sp|P22748|CAH4_HUMAN Carbonic anhydrase 4 OS=Homo sapiens OX=9606 GN=CA4 PE=1 SV=2	25.812	25.4775	25.812	25.5305	23.9339	26.8932	25.8899	24.8274
CA8	P35219	Carbonic anhydrase-related protein	sp|P35219|CAH8_HUMAN Carbonic anhydrase-related protein OS=Homo sapiens OX=9606 GN=CA8 PE=1 SV=3	NA	NA	NA	NA	NA	NA	22.6679	NA
CAB39	Q9Y376	Calcium-binding protein 39	sp|Q9Y376|CAB39_HUMAN Calcium-binding protein 39 OS=Homo sapiens OX=9606 GN=CAB39 PE=1 SV=1	26.0784	26.4143	26.2748	26.3425	25.0796	25.3069	25.3741	24.8618
CAB39L	Q9H9S4	Calcium-binding protein 39-like	sp|Q9H9S4|CB39L_HUMAN Calcium-binding protein 39-like OS=Homo sapiens OX=9606 GN=CAB39L PE=1 SV=3	24.8081	24.8899	25.2733	24.6937	24.2727	24.2838	24.3305	23.754
CABLES1	Q8TDN4	CDK5 and ABL1 enzyme substrate 1	sp|Q8TDN4|CABL1_HUMAN CDK5 and ABL1 enzyme substrate 1 OS=Homo sapiens OX=9606 GN=CABLES1 PE=1 SV=2	NA	NA	22.9241	22.245	NA	23.3809	23.1258	23.5563
CACNA1A	O00555	Voltage-dependent P/Q-type calcium channel subunit alpha-1A	sp|O00555|CAC1A_HUMAN Voltage-dependent P/Q-type calcium channel subunit alpha-1A OS=Homo sapiens OX=9606 GN=CACNA1A PE=1 SV=3	22.4099	NA	23.0566	21.9389	NA	23.145	22.2835	NA
CACNA1B	Q00975	Voltage-dependent N-type calcium channel subunit alpha-1B	sp|Q00975|CAC1B_HUMAN Voltage-dependent N-type calcium channel subunit alpha-1B OS=Homo sapiens OX=9606 GN=CACNA1B PE=1 SV=1	NA	NA	23.1139	22.5314	NA	22.9162	23.215	23.5188
CACNA1E	Q15878	Voltage-dependent R-type calcium channel subunit alpha-1E	sp|Q15878|CAC1E_HUMAN Voltage-dependent R-type calcium channel subunit alpha-1E OS=Homo sapiens OX=9606 GN=CACNA1E PE=1 SV=3	NA	23.1631	23.3869	22.8787	NA	23.5221	23.0637	23.5899
CACNA2D1	P54289	Voltage-dependent calcium channel subunit alpha-2/delta-1;Voltage-dependent calcium channel subunit alpha-2-1;Voltage-dependent calcium channel subunit delta-1	sp|P54289|CA2D1_HUMAN Voltage-dependent calcium channel subunit alpha-2/delta-1 OS=Homo sapiens OX=9606 GN=CACNA2D1 PE=1 SV=3	28.1517	27.8655	28.1905	27.5035	27.2405	28.5687	28.4759	28.2294
CACNA2D2	Q9NY47	Voltage-dependent calcium channel subunit alpha-2/delta-2;Voltage-dependent calcium channel subunit alpha-2-2;Voltage-dependent calcium channel subunit delta-2	sp|Q9NY47|CA2D2_HUMAN Voltage-dependent calcium channel subunit alpha-2/delta-2 OS=Homo sapiens OX=9606 GN=CACNA2D2 PE=1 SV=2	24.1679	24.4432	24.8226	24.0218	23.4827	23.9092	23.9804	NA
CACNA2D3	Q8IZS8	Voltage-dependent calcium channel subunit alpha-2/delta-3;Voltage-dependent calcium channel subunit alpha-2-3;Voltage-dependent calcium channel subunit delta-3	sp|Q8IZS8|CA2D3_HUMAN Voltage-dependent calcium channel subunit alpha-2/delta-3 OS=Homo sapiens OX=9606 GN=CACNA2D3 PE=1 SV=1	23.8737	24.1141	24.1488	23.9347	23.8043	24.26	24.3319	24.0097
CACNB1	Q02641	Voltage-dependent L-type calcium channel subunit beta-1;Voltage-dependent L-type calcium channel subunit beta-2	sp|Q02641|CACB1_HUMAN Voltage-dependent L-type calcium channel subunit beta-1 OS=Homo sapiens OX=9606 GN=CACNB1 PE=1 SV=3;sp|Q08289|CACB2_HUMAN Voltage-dependent L-type calcium channel subunit beta-2 OS=Homo sapiens OX=9606 GN=CACNB2 PE=1 SV=3	22.9569	22.6335	22.7764	22.5603	NA	22.4131	23.4298	23.2504
CACNB3	P54284	Voltage-dependent L-type calcium channel subunit beta-3	sp|P54284|CACB3_HUMAN Voltage-dependent L-type calcium channel subunit beta-3 OS=Homo sapiens OX=9606 GN=CACNB3 PE=1 SV=1	23.6461	23.7381	23.9888	23.8037	NA	23.6777	24.9624	24.5305
CACNB4	O00305	Voltage-dependent L-type calcium channel subunit beta-4	sp|O00305|CACB4_HUMAN Voltage-dependent L-type calcium channel subunit beta-4 OS=Homo sapiens OX=9606 GN=CACNB4 PE=1 SV=2	23.5796	23.6436	23.6836	23.3889	NA	22.7489	23.3237	NA
CACNG2	Q9Y698	Voltage-dependent calcium channel gamma-2 subunit	sp|Q9Y698|CCG2_HUMAN Voltage-dependent calcium channel gamma-2 subunit OS=Homo sapiens OX=9606 GN=CACNG2 PE=1 SV=1	22.8562	NA	23.0061	22.9756	NA	23.453	22.9402	NA
CACNG8	Q8WXS5	Voltage-dependent calcium channel gamma-8 subunit	sp|Q8WXS5|CCG8_HUMAN Voltage-dependent calcium channel gamma-8 subunit OS=Homo sapiens OX=9606 GN=CACNG8 PE=2 SV=3	23.469	24.3214	24.0791	23.9485	NA	23.7297	23.0372	NA
CACYBP	Q9HB71	Calcyclin-binding protein	sp|Q9HB71|CYBP_HUMAN Calcyclin-binding protein OS=Homo sapiens OX=9606 GN=CACYBP PE=1 SV=2	26.1027	26.7221	26.9946	27.5056	26.6288	26.3263	27.0916	24.8071
CAD	P27708	CAD protein;Glutamine-dependent carbamoyl-phosphate synthase;Aspartate carbamoyltransferase;Dihydroorotase	sp|P27708|PYR1_HUMAN CAD protein OS=Homo sapiens OX=9606 GN=CAD PE=1 SV=3	NA	21.3583	21.2464	21.2354	22.5118	21.6801	22.3161	22.1708
CADM1	Q9BY67	Cell adhesion molecule 1	sp|Q9BY67|CADM1_HUMAN Cell adhesion molecule 1 OS=Homo sapiens OX=9606 GN=CADM1 PE=1 SV=2	24.8928	23.9176	24.5832	25.162	24.1894	24.0904	24.0454	24.3365
CADM2	Q8N3J6	Cell adhesion molecule 2	sp|Q8N3J6|CADM2_HUMAN Cell adhesion molecule 2 OS=Homo sapiens OX=9606 GN=CADM2 PE=2 SV=1	28.9343	28.9213	28.9037	28.6004	28.9581	29.08	29.4984	29.0022
CADM3	Q8N126	Cell adhesion molecule 3	sp|Q8N126|CADM3_HUMAN Cell adhesion molecule 3 OS=Homo sapiens OX=9606 GN=CADM3 PE=1 SV=1	27.7943	27.6657	27.6494	27.5336	26.5013	26.8824	27.3876	27.4246
CADM4	Q8NFZ8	Cell adhesion molecule 4	sp|Q8NFZ8|CADM4_HUMAN Cell adhesion molecule 4 OS=Homo sapiens OX=9606 GN=CADM4 PE=1 SV=1	24.964	24.9741	25.3768	25.4272	24.0439	24.5132	24.4834	24.4192
CADPS	Q9ULU8	Calcium-dependent secretion activator 1	sp|Q9ULU8|CAPS1_HUMAN Calcium-dependent secretion activator 1 OS=Homo sapiens OX=9606 GN=CADPS PE=1 SV=3	28.0462	28.2915	28.2464	28.0977	27.6263	28.4358	28.4775	27.4984
CADPS2	Q86UW7	Calcium-dependent secretion activator 2	sp|Q86UW7|CAPS2_HUMAN Calcium-dependent secretion activator 2 OS=Homo sapiens OX=9606 GN=CADPS2 PE=1 SV=2	23.9852	24.2028	24.2593	24.1009	24.0178	24.2067	23.7542	23.6899
CALB1	P05937	Calbindin	sp|P05937|CALB1_HUMAN Calbindin OS=Homo sapiens OX=9606 GN=CALB1 PE=1 SV=2	26.0637	26.2554	26.1126	25.4056	21.6837	25.1434	25.653	24.8739
CALB2	P22676	Calretinin	sp|P22676|CALB2_HUMAN Calretinin OS=Homo sapiens OX=9606 GN=CALB2 PE=2 SV=2	24.4129	24.9992	23.6158	24.5713	20.9893	21.9342	23.4928	21.245
CALCOCO1	Q9P1Z2	Calcium-binding and coiled-coil domain-containing protein 1	sp|Q9P1Z2|CACO1_HUMAN Calcium-binding and coiled-coil domain-containing protein 1 OS=Homo sapiens OX=9606 GN=CALCOCO1 PE=1 SV=2	23.9582	23.7803	23.4491	23.7299	24.9478	24.5293	24.1193	24.586
CALD1	Q05682	Caldesmon	sp|Q05682|CALD1_HUMAN Caldesmon OS=Homo sapiens OX=9606 GN=CALD1 PE=1 SV=3	23.5241	23.7098	23.3732	23.5432	23.8733	22.7263	NA	NA
CALML5	Q9NZT1	Calmodulin-like protein 5	sp|Q9NZT1|CALL5_HUMAN Calmodulin-like protein 5 OS=Homo sapiens OX=9606 GN=CALML5 PE=1 SV=2	NA	NA	NA	NA	NA	NA	25.447	NA
CALR	P27797	Calreticulin	sp|P27797|CALR_HUMAN Calreticulin OS=Homo sapiens OX=9606 GN=CALR PE=1 SV=1	27.232	27.6734	27.3183	28.0673	28.0176	28.0957	27.8704	26.7001
CALU	O43852	Calumenin	sp|O43852|CALU_HUMAN Calumenin OS=Homo sapiens OX=9606 GN=CALU PE=1 SV=2	24.9254	25.3144	25.1648	25.2337	26.2261	25.9235	25.7922	25.0039
CAMK1D	Q8IU85	Calcium/calmodulin-dependent protein kinase type 1D	sp|Q8IU85|KCC1D_HUMAN Calcium/calmodulin-dependent protein kinase type 1D OS=Homo sapiens OX=9606 GN=CAMK1D PE=1 SV=1	25.306	25.8457	25.6357	25.9469	25.7294	25.5634	25.9865	25.8597
CAMK2A	Q9UQM7	Calcium/calmodulin-dependent protein kinase type II subunit alpha	sp|Q9UQM7|KCC2A_HUMAN Calcium/calmodulin-dependent protein kinase type II subunit alpha OS=Homo sapiens OX=9606 GN=CAMK2A PE=1 SV=2	31.7584	31.5237	31.5585	31.5358	31.3702	32.5414	31.9459	32.6431
CAMK2B	Q13554	Calcium/calmodulin-dependent protein kinase type II subunit beta	sp|Q13554|KCC2B_HUMAN Calcium/calmodulin-dependent protein kinase type II subunit beta OS=Homo sapiens OX=9606 GN=CAMK2B PE=1 SV=3	28.6417	28.5139	28.565	28.3996	28.3929	29.1958	29.6139	29.3197
CAMK2D	Q13557	Calcium/calmodulin-dependent protein kinase type II subunit delta	sp|Q13557|KCC2D_HUMAN Calcium/calmodulin-dependent protein kinase type II subunit delta OS=Homo sapiens OX=9606 GN=CAMK2D PE=1 SV=3	27.6099	27.597	27.8339	27.43	27.8278	27.9378	26.5556	27.6102
CAMK2G	Q13555	Calcium/calmodulin-dependent protein kinase type II subunit gamma	sp|Q13555|KCC2G_HUMAN Calcium/calmodulin-dependent protein kinase type II subunit gamma OS=Homo sapiens OX=9606 GN=CAMK2G PE=1 SV=4	26.9961	27.633	27.5708	27.8261	26.646	27.0503	27.7914	27.0947
CAMK4	Q16566	Calcium/calmodulin-dependent protein kinase type IV	sp|Q16566|KCC4_HUMAN Calcium/calmodulin-dependent protein kinase type IV OS=Homo sapiens OX=9606 GN=CAMK4 PE=1 SV=1	26.1191	27.0448	26.7917	26.1262	25.8578	27.2443	25.8258	25.8485
CAMKK1	Q8N5S9	Calcium/calmodulin-dependent protein kinase kinase 1	sp|Q8N5S9|KKCC1_HUMAN Calcium/calmodulin-dependent protein kinase kinase 1 OS=Homo sapiens OX=9606 GN=CAMKK1 PE=1 SV=2	25.8587	25.5411	25.3277	25.3338	25.9283	26.3232	26.1893	26.9116
CAMKK2	Q96RR4	Calcium/calmodulin-dependent protein kinase kinase 2	sp|Q96RR4|KKCC2_HUMAN Calcium/calmodulin-dependent protein kinase kinase 2 OS=Homo sapiens OX=9606 GN=CAMKK2 PE=1 SV=2	25.5788	26.234	26.3602	26.4324	25.8331	26.2891	26.8006	26.3722
CAMKV	Q8NCB2	CaM kinase-like vesicle-associated protein	sp|Q8NCB2|CAMKV_HUMAN CaM kinase-like vesicle-associated protein OS=Homo sapiens OX=9606 GN=CAMKV PE=2 SV=2	29.5046	29.4541	29.2704	29.1597	28.4816	29.7523	29.628	30.4589
CAMLG	P49069	Calcium signal-modulating cyclophilin ligand	sp|P49069|CAMLG_HUMAN Calcium signal-modulating cyclophilin ligand OS=Homo sapiens OX=9606 GN=CAMLG PE=1 SV=1	23.6761	23.4122	23.6926	23.602	24.3965	24.4054	24.2428	24.399
CAMSAP1	Q5T5Y3	Calmodulin-regulated spectrin-associated protein 1	sp|Q5T5Y3|CAMP1_HUMAN Calmodulin-regulated spectrin-associated protein 1 OS=Homo sapiens OX=9606 GN=CAMSAP1 PE=1 SV=2	22.7644	22.5541	NA	23.1668	23.3244	23.1385	22.9601	22.7421
CAMSAP2	Q08AD1	Calmodulin-regulated spectrin-associated protein 2	sp|Q08AD1|CAMP2_HUMAN Calmodulin-regulated spectrin-associated protein 2 OS=Homo sapiens OX=9606 GN=CAMSAP2 PE=1 SV=3	23.6947	24.0633	24.0799	23.9088	23.4438	23.7586	22.0479	24.2288
CAMSAP3	Q9P1Y5	Calmodulin-regulated spectrin-associated protein 3	sp|Q9P1Y5|CAMP3_HUMAN Calmodulin-regulated spectrin-associated protein 3 OS=Homo sapiens OX=9606 GN=CAMSAP3 PE=1 SV=2	25.4585	25.5936	25.7279	25.4677	26.4999	26.5592	27.3047	26.8865
CAND1	Q86VP6	Cullin-associated NEDD8-dissociated protein 1	sp|Q86VP6|CAND1_HUMAN Cullin-associated NEDD8-dissociated protein 1 OS=Homo sapiens OX=9606 GN=CAND1 PE=1 SV=2	29.122	29.3146	29.3161	29.136	28.7983	29.1226	29.1771	28.2062
CAND2	O75155	Cullin-associated NEDD8-dissociated protein 2	sp|O75155|CAND2_HUMAN Cullin-associated NEDD8-dissociated protein 2 OS=Homo sapiens OX=9606 GN=CAND2 PE=1 SV=3	NA	22.3129	22.2025	21.2098	NA	22.032	22.6076	NA
CANX	P27824	Calnexin	sp|P27824|CALX_HUMAN Calnexin OS=Homo sapiens OX=9606 GN=CANX PE=1 SV=2	27.524	27.9444	27.9935	28.4129	28.0172	27.6945	26.9176	27.3157
CAP1	Q01518	Adenylyl cyclase-associated protein 1	sp|Q01518|CAP1_HUMAN Adenylyl cyclase-associated protein 1 OS=Homo sapiens OX=9606 GN=CAP1 PE=1 SV=5	28.735	28.7082	29.0206	28.9359	27.9848	28.4709	29.2146	28.3539
CAP2	P40123	Adenylyl cyclase-associated protein 2	sp|P40123|CAP2_HUMAN Adenylyl cyclase-associated protein 2 OS=Homo sapiens OX=9606 GN=CAP2 PE=1 SV=1	29.4276	29.2849	29.3749	29.1496	29.6924	29.9431	30.5393	29.6026
CAPG	P40121	Macrophage-capping protein	sp|P40121|CAPG_HUMAN Macrophage-capping protein OS=Homo sapiens OX=9606 GN=CAPG PE=1 SV=2	24.0758	24.2087	23.7455	24.1746	23.1451	22.6098	NA	22.5001
CAPN1	P07384	Calpain-1 catalytic subunit	sp|P07384|CAN1_HUMAN Calpain-1 catalytic subunit OS=Homo sapiens OX=9606 GN=CAPN1 PE=1 SV=1	26.4013	26.3329	26.4818	26.9808	24.6325	25.3113	25.637	25.7559
CAPN2	P17655	Calpain-2 catalytic subunit	sp|P17655|CAN2_HUMAN Calpain-2 catalytic subunit OS=Homo sapiens OX=9606 GN=CAPN2 PE=1 SV=6	24.5795	24.52	24.5402	25.0865	24.1574	23.3264	24.0439	24.0686
CAPN5	O15484	Calpain-5	sp|O15484|CAN5_HUMAN Calpain-5 OS=Homo sapiens OX=9606 GN=CAPN5 PE=1 SV=2	NA	NA	22.9473	NA	NA	23.5397	NA	NA
CAPNS1	P04632	Calpain small subunit 1	sp|P04632|CPNS1_HUMAN Calpain small subunit 1 OS=Homo sapiens OX=9606 GN=CAPNS1 PE=1 SV=1	27.2054	27.3316	27.2635	27.6513	26.1532	25.6441	26.6651	27.01
CAPRIN1	Q14444	Caprin-1	sp|Q14444|CAPR1_HUMAN Caprin-1 OS=Homo sapiens OX=9606 GN=CAPRIN1 PE=1 SV=2	25.728	25.7619	25.9224	25.8326	25.6328	25.7912	25.6509	25.3568
CAPS	Q13938	Calcyphosin	sp|Q13938|CAYP1_HUMAN Calcyphosin OS=Homo sapiens OX=9606 GN=CAPS PE=1 SV=2	NA	NA	NA	NA	NA	21.9425	23.3239	22.7786
CAPZA1	P52907	F-actin-capping protein subunit alpha-1	sp|P52907|CAZA1_HUMAN F-actin-capping protein subunit alpha-1 OS=Homo sapiens OX=9606 GN=CAPZA1 PE=1 SV=3	25.6213	26.1366	26.1653	26.2449	23.7681	23.8986	24.9631	24.024
CAPZA2	P47755	F-actin-capping protein subunit alpha-2	sp|P47755|CAZA2_HUMAN F-actin-capping protein subunit alpha-2 OS=Homo sapiens OX=9606 GN=CAPZA2 PE=1 SV=3	27.1207	27.6373	27.6029	27.6145	25.4863	26.0891	27.4867	25.8951
CAPZB	P47756	F-actin-capping protein subunit beta	sp|P47756|CAPZB_HUMAN F-actin-capping protein subunit beta OS=Homo sapiens OX=9606 GN=CAPZB PE=1 SV=4	26.953	27.0561	26.879	27.0052	24.8021	25.5991	25.7514	25.2832
CARKD	Q8IW45	ATP-dependent (S)-NAD(P)H-hydrate dehydratase	sp|Q8IW45|NNRD_HUMAN ATP-dependent (S)-NAD(P)H-hydrate dehydratase OS=Homo sapiens OX=9606 GN=NAXD PE=1 SV=1	NA	24.2842	24.3954	25.1697	NA	NA	25.1177	NA
CARM1	Q86X55	Histone-arginine methyltransferase CARM1	sp|Q86X55|CARM1_HUMAN Histone-arginine methyltransferase CARM1 OS=Homo sapiens OX=9606 GN=CARM1 PE=1 SV=3	NA	NA	NA	23.7612	23.6727	24.1469	NA	NA
CARNS1	A5YM72	Carnosine synthase 1	sp|A5YM72|CRNS1_HUMAN Carnosine synthase 1 OS=Homo sapiens OX=9606 GN=CARNS1 PE=1 SV=3	NA	24.7046	23.5666	25.0483	NA	NA	NA	NA
CARS	P49589	Cysteine--tRNA ligase, cytoplasmic	sp|P49589|SYCC_HUMAN Cysteine--tRNA ligase, cytoplasmic OS=Homo sapiens OX=9606 GN=CARS PE=1 SV=3	25.0454	25.6444	25.5549	25.3719	24.5692	24.639	25.2208	22.8787
CASK	O14936	Peripheral plasma membrane protein CASK	sp|O14936|CSKP_HUMAN Peripheral plasma membrane protein CASK OS=Homo sapiens OX=9606 GN=CASK PE=1 SV=3	23.6327	23.8967	23.7387	23.6831	23.039	24.3673	23.7195	23.3844
CASKIN1	Q8WXD9	Caskin-1	sp|Q8WXD9|CSKI1_HUMAN Caskin-1 OS=Homo sapiens OX=9606 GN=CASKIN1 PE=1 SV=1	27.176	27.0127	27.0657	26.5862	26.2606	27.5111	27.5556	27.1062
CAST	P20810	Calpastatin	sp|P20810|ICAL_HUMAN Calpastatin OS=Homo sapiens OX=9606 GN=CAST PE=1 SV=4	NA	23.052	23.5317	23.8929	NA	NA	NA	NA
CAT	P04040	Catalase	sp|P04040|CATA_HUMAN Catalase OS=Homo sapiens OX=9606 GN=CAT PE=1 SV=3	24.0971	24.5862	24.0061	25.1884	24.6225	23.3605	24.2566	24.4702
CBR1	P16152	Carbonyl reductase [NADPH] 1	sp|P16152|CBR1_HUMAN Carbonyl reductase [NADPH] 1 OS=Homo sapiens OX=9606 GN=CBR1 PE=1 SV=3	26.8983	27.4884	27.0047	28.6268	28.6017	28.314	28.6304	27.1757
CBR3	O75828	Carbonyl reductase [NADPH] 3	sp|O75828|CBR3_HUMAN Carbonyl reductase [NADPH] 3 OS=Homo sapiens OX=9606 GN=CBR3 PE=1 SV=3	26.0865	25.845	25.7367	26.8181	NA	26.6119	26.9639	NA
CBS	P0DN79	Cystathionine beta-synthase	sp|P0DN79|CBSL_HUMAN Cystathionine beta-synthase-like protein OS=Homo sapiens OX=9606 GN=CBSL PE=1 SV=1;sp|P35520|CBS_HUMAN Cystathionine beta-synthase OS=Homo sapiens OX=9606 GN=CBS PE=1 SV=2	23.1887	23.7739	23.3309	23.8326	NA	NA	23.9983	23.083
CBX3	Q13185	Chromobox protein homolog 3	sp|Q13185|CBX3_HUMAN Chromobox protein homolog 3 OS=Homo sapiens OX=9606 GN=CBX3 PE=1 SV=4	22.9462	NA	NA	24.1179	24.5969	25.0073	25.2924	23.7679
CC2D1A	Q6P1N0	Coiled-coil and C2 domain-containing protein 1A	sp|Q6P1N0|C2D1A_HUMAN Coiled-coil and C2 domain-containing protein 1A OS=Homo sapiens OX=9606 GN=CC2D1A PE=1 SV=1	24.0118	24.1009	23.8337	23.8945	26.3136	24.7677	24.9808	24.7316
CCAR2	Q8N163	Cell cycle and apoptosis regulator protein 2	sp|Q8N163|CCAR2_HUMAN Cell cycle and apoptosis regulator protein 2 OS=Homo sapiens OX=9606 GN=CCAR2 PE=1 SV=2	25.0345	25.3308	25.2893	25.1586	25.6764	25.7286	25.8251	25.5869
CCBL1	Q16773	Kynurenine--oxoglutarate transaminase 1	sp|Q16773|KAT1_HUMAN Kynurenine--oxoglutarate transaminase 1 OS=Homo sapiens OX=9606 GN=KYAT1 PE=1 SV=1	22.579	NA	23.709	22.8982	NA	22.4753	NA	NA
CCBL2	Q6YP21	Kynurenine--oxoglutarate transaminase 3	sp|Q6YP21|KAT3_HUMAN Kynurenine--oxoglutarate transaminase 3 OS=Homo sapiens OX=9606 GN=KYAT3 PE=1 SV=1	24.3744	24.9078	24.7523	25.1581	24.2495	25.2738	23.7688	24.8306
CCDC124	Q96CT7	Coiled-coil domain-containing protein 124	sp|Q96CT7|CC124_HUMAN Coiled-coil domain-containing protein 124 OS=Homo sapiens OX=9606 GN=CCDC124 PE=1 SV=1	23.5295	NA	NA	NA	NA	23.8673	22.9413	23.6784
CCDC127	Q96BQ5	Coiled-coil domain-containing protein 127	sp|Q96BQ5|CC127_HUMAN Coiled-coil domain-containing protein 127 OS=Homo sapiens OX=9606 GN=CCDC127 PE=1 SV=1	23.6935	23.8261	23.5595	23.6623	23.7694	23.8628	23.6569	24.2655
CCDC132	Q96JG6	Coiled-coil domain-containing protein 132	sp|Q96JG6|VPS50_HUMAN Syndetin OS=Homo sapiens OX=9606 GN=VPS50 PE=1 SV=3	25.0991	25.4846	25.4801	26.0178	23.8885	25.3938	25.0104	24.8233
CCDC136	Q96JN2	Coiled-coil domain-containing protein 136	sp|Q96JN2|CC136_HUMAN Coiled-coil domain-containing protein 136 OS=Homo sapiens OX=9606 GN=CCDC136 PE=1 SV=3	23.0855	22.6659	NA	22.9293	NA	NA	NA	NA
CCDC177	Q9NQR7	Coiled-coil domain-containing protein 177	sp|Q9NQR7|CC177_HUMAN Coiled-coil domain-containing protein 177 OS=Homo sapiens OX=9606 GN=CCDC177 PE=2 SV=3	22.5478	22.6831	22.6484	21.5261	23.723	24.0348	24.6072	24.4164
CCDC22	O60826	Coiled-coil domain-containing protein 22	sp|O60826|CCD22_HUMAN Coiled-coil domain-containing protein 22 OS=Homo sapiens OX=9606 GN=CCDC22 PE=1 SV=1	24.1952	24.2686	24.3147	24.1197	23.7288	24.2552	24.9174	24.6531
CCDC43	Q96MW1	Coiled-coil domain-containing protein 43	sp|Q96MW1|CCD43_HUMAN Coiled-coil domain-containing protein 43 OS=Homo sapiens OX=9606 GN=CCDC43 PE=1 SV=2	23.0671	22.9851	23.0393	NA	24.0722	24.0348	24.2626	23.9701
CCDC47	Q96A33	Coiled-coil domain-containing protein 47	sp|Q96A33|CCD47_HUMAN Coiled-coil domain-containing protein 47 OS=Homo sapiens OX=9606 GN=CCDC47 PE=1 SV=1	24.2314	24.443	24.4073	24.2909	25.4139	24.3426	23.742	23.9797
CCDC53	Q9Y3C0	WASH complex subunit CCDC53	sp|Q9Y3C0|WASC3_HUMAN WASH complex subunit 3 OS=Homo sapiens OX=9606 GN=WASHC3 PE=1 SV=1	23.3556	23.3758	23.4385	23.402	23.763	23.6295	23.567	23.0909
CCDC6	Q16204	Coiled-coil domain-containing protein 6	sp|Q16204|CCDC6_HUMAN Coiled-coil domain-containing protein 6 OS=Homo sapiens OX=9606 GN=CCDC6 PE=1 SV=2	25.6661	25.5923	25.7841	25.9227	26.0014	24.9035	25.8482	26.0405
CCDC88A	Q3V6T2	Girdin	sp|Q3V6T2|GRDN_HUMAN Girdin OS=Homo sapiens OX=9606 GN=CCDC88A PE=1 SV=2	23.5048	23.4122	23.6069	23.2273	23.7192	24.1192	24.3588	23.8236
CCDC90B	Q9GZT6	Coiled-coil domain-containing protein 90B, mitochondrial	sp|Q9GZT6|CC90B_HUMAN Coiled-coil domain-containing protein 90B, mitochondrial OS=Homo sapiens OX=9606 GN=CCDC90B PE=1 SV=2	23.7345	23.1323	23.126	23.0491	24.0888	23.743	24.0479	24.7253
CCDC91	Q7Z6B0	Coiled-coil domain-containing protein 91	sp|Q7Z6B0|CCD91_HUMAN Coiled-coil domain-containing protein 91 OS=Homo sapiens OX=9606 GN=CCDC91 PE=1 SV=2	22.565	NA	22.2572	22.8577	22.6706	22.7679	22.7025	NA
CCDC92	Q53HC0	Coiled-coil domain-containing protein 92	sp|Q53HC0|CCD92_HUMAN Coiled-coil domain-containing protein 92 OS=Homo sapiens OX=9606 GN=CCDC92 PE=1 SV=2	22.5537	22.9096	22.5701	23.258	NA	NA	NA	NA
CCDC93	Q567U6	Coiled-coil domain-containing protein 93	sp|Q567U6|CCD93_HUMAN Coiled-coil domain-containing protein 93 OS=Homo sapiens OX=9606 GN=CCDC93 PE=1 SV=2	23.1876	23.3088	23.4896	23.576	NA	23.8109	23.9625	NA
CCDC96	Q2M329	Coiled-coil domain-containing protein 96	sp|Q2M329|CCD96_HUMAN Coiled-coil domain-containing protein 96 OS=Homo sapiens OX=9606 GN=CCDC96 PE=2 SV=2	NA	24.0812	24.0639	NA	24.3886	24.7985	NA	NA
CCS	O14618	Copper chaperone for superoxide dismutase	sp|O14618|CCS_HUMAN Copper chaperone for superoxide dismutase OS=Homo sapiens OX=9606 GN=CCS PE=1 SV=1	NA	22.5331	22.6177	21.9109	NA	NA	22.5871	NA
CCSAP	Q6IQ19	Centriole, cilia and spindle-associated protein	sp|Q6IQ19|CCSAP_HUMAN Centriole, cilia and spindle-associated protein OS=Homo sapiens OX=9606 GN=CCSAP PE=1 SV=2	NA	NA	NA	NA	NA	23.6842	24.3035	23.8863
CCT2	P78371	T-complex protein 1 subunit beta	sp|P78371|TCPB_HUMAN T-complex protein 1 subunit beta OS=Homo sapiens OX=9606 GN=CCT2 PE=1 SV=4	29.4587	29.4555	29.5629	29.3701	28.8245	29.0287	29.5474	28.7985
CCT3	P49368	T-complex protein 1 subunit gamma	sp|P49368|TCPG_HUMAN T-complex protein 1 subunit gamma OS=Homo sapiens OX=9606 GN=CCT3 PE=1 SV=4	28.5823	28.8691	28.8929	28.89	27.5016	27.6939	28.0468	27.2084
CCT4	P50991	T-complex protein 1 subunit delta	sp|P50991|TCPD_HUMAN T-complex protein 1 subunit delta OS=Homo sapiens OX=9606 GN=CCT4 PE=1 SV=4	28.4743	28.7731	28.8599	28.6072	26.669	27.0917	27.4832	26.5342
CCT5	P48643	T-complex protein 1 subunit epsilon	sp|P48643|TCPE_HUMAN T-complex protein 1 subunit epsilon OS=Homo sapiens OX=9606 GN=CCT5 PE=1 SV=1	28.1878	28.4341	28.5523	28.7679	27.0949	27.0024	27.6209	27.3119
CCT6A	P40227	T-complex protein 1 subunit zeta	sp|P40227|TCPZ_HUMAN T-complex protein 1 subunit zeta OS=Homo sapiens OX=9606 GN=CCT6A PE=1 SV=3	28.236	28.4626	28.424	28.1968	27.5692	28.0633	28.3918	28.2073
CCT7	Q99832	T-complex protein 1 subunit eta	sp|Q99832|TCPH_HUMAN T-complex protein 1 subunit eta OS=Homo sapiens OX=9606 GN=CCT7 PE=1 SV=2	28.4471	28.532	28.6663	28.5367	27.2339	27.975	28.1975	27.7666
CCT8	P50990	T-complex protein 1 subunit theta	sp|P50990|TCPQ_HUMAN T-complex protein 1 subunit theta OS=Homo sapiens OX=9606 GN=CCT8 PE=1 SV=4	28.0311	28.4294	28.5872	28.7404	26.3613	26.4162	27.2406	26.1898
CCZ1	P86791	Vacuolar fusion protein CCZ1 homolog;Vacuolar fusion protein CCZ1 homolog B	sp|P86791|CCZ1_HUMAN Vacuolar fusion protein CCZ1 homolog OS=Homo sapiens OX=9606 GN=CCZ1 PE=1 SV=1;sp|P86790|CCZ1B_HUMAN Vacuolar fusion protein CCZ1 homolog B OS=Homo sapiens OX=9606 GN=CCZ1B PE=1 SV=1	22.031	NA	22.5894	22.4487	NA	NA	NA	NA
CD14	P08571	Monocyte differentiation antigen CD14;Monocyte differentiation antigen CD14, urinary form;Monocyte differentiation antigen CD14, membrane-bound form	sp|P08571|CD14_HUMAN Monocyte differentiation antigen CD14 OS=Homo sapiens OX=9606 GN=CD14 PE=1 SV=2	NA	NA	NA	NA	23.7372	NA	NA	NA
CD44	P16070	CD44 antigen	sp|P16070|CD44_HUMAN CD44 antigen OS=Homo sapiens OX=9606 GN=CD44 PE=1 SV=3	NA	21.622	NA	NA	23.7787	NA	NA	NA
CD47	Q08722	Leukocyte surface antigen CD47	sp|Q08722|CD47_HUMAN Leukocyte surface antigen CD47 OS=Homo sapiens OX=9606 GN=CD47 PE=1 SV=1	28.5698	28.7125	28.9229	28.6373	28.6241	29.3154	29.2694	27.8173
CD81	P60033	CD81 antigen	sp|P60033|CD81_HUMAN CD81 antigen OS=Homo sapiens OX=9606 GN=CD81 PE=1 SV=1	24.6813	25.1664	25.2865	25.6298	24.6109	24.1829	NA	23.2591
CD9	P21926	CD9 antigen	sp|P21926|CD9_HUMAN CD9 antigen OS=Homo sapiens OX=9606 GN=CD9 PE=1 SV=4	26.3857	26.7512	27.4004	27.2653	25.8343	24.752	19.8438	22.4932
CD99L2	Q8TCZ2	CD99 antigen-like protein 2	sp|Q8TCZ2|C99L2_HUMAN CD99 antigen-like protein 2 OS=Homo sapiens OX=9606 GN=CD99L2 PE=1 SV=1	24.5032	25.5753	25.8689	26.2504	NA	23.9675	24.2313	NA
CDC34	P49427	Ubiquitin-conjugating enzyme E2 R1	sp|P49427|UB2R1_HUMAN Ubiquitin-conjugating enzyme E2 R1 OS=Homo sapiens OX=9606 GN=CDC34 PE=1 SV=2	NA	NA	NA	22.1091	NA	22.4352	NA	22.7503
CDC37	Q16543	Hsp90 co-chaperone Cdc37;Hsp90 co-chaperone Cdc37, N-terminally processed	sp|Q16543|CDC37_HUMAN Hsp90 co-chaperone Cdc37 OS=Homo sapiens OX=9606 GN=CDC37 PE=1 SV=1	27.3307	27.4914	27.55	27.9984	25.5323	25.9703	26.6072	25.0477
CDC42	P60953	Cell division control protein 42 homolog	sp|P60953|CDC42_HUMAN Cell division control protein 42 homolog OS=Homo sapiens OX=9606 GN=CDC42 PE=1 SV=2	26.1741	26.1871	26.7286	27.6542	25.4389	24.9995	25.1357	25.6379
CDC42BPA	Q5VT25	Serine/threonine-protein kinase MRCK alpha	sp|Q5VT25|MRCKA_HUMAN Serine/threonine-protein kinase MRCK alpha OS=Homo sapiens OX=9606 GN=CDC42BPA PE=1 SV=1	23.7002	23.9356	24.5246	24.0999	24.0416	23.8243	24.5259	NA
CDC42BPB	Q9Y5S2	Serine/threonine-protein kinase MRCK beta	sp|Q9Y5S2|MRCKB_HUMAN Serine/threonine-protein kinase MRCK beta OS=Homo sapiens OX=9606 GN=CDC42BPB PE=1 SV=2	25.1348	25.111	25.3376	25.6341	25.2192	26.1231	24.9182	25.6314
CDC42EP1	Q00587	Cdc42 effector protein 1	sp|Q00587|BORG5_HUMAN Cdc42 effector protein 1 OS=Homo sapiens OX=9606 GN=CDC42EP1 PE=1 SV=1	21.3076	23.4945	23.6779	24.1081	23.9212	NA	NA	NA
CDC42EP4	Q9H3Q1	Cdc42 effector protein 4	sp|Q9H3Q1|BORG4_HUMAN Cdc42 effector protein 4 OS=Homo sapiens OX=9606 GN=CDC42EP4 PE=1 SV=1	24.9462	23.6305	25.4391	25.7016	24.9038	24.7452	22.7941	25.9764
CDC5L	Q99459	Cell division cycle 5-like protein	sp|Q99459|CDC5L_HUMAN Cell division cycle 5-like protein OS=Homo sapiens OX=9606 GN=CDC5L PE=1 SV=2	NA	NA	NA	NA	22.9828	NA	NA	NA
CDH10	Q9Y6N8	Cadherin-10	sp|Q9Y6N8|CAD10_HUMAN Cadherin-10 OS=Homo sapiens OX=9606 GN=CDH10 PE=1 SV=2	24.418	24.4797	24.66	24.135	24.0065	25.175	25.1653	23.8986
CDH13	P55290	Cadherin-13	sp|P55290|CAD13_HUMAN Cadherin-13 OS=Homo sapiens OX=9606 GN=CDH13 PE=1 SV=1	27.9187	28.1552	28.0849	27.7982	27.9749	28.1043	27.4065	28.2957
CDH2	P19022	Cadherin-2	sp|P19022|CADH2_HUMAN Cadherin-2 OS=Homo sapiens OX=9606 GN=CDH2 PE=1 SV=4	26.4652	26.5722	26.8723	26.5015	25.9423	26.683	26.0395	26.2711
CDH6	P55285	Cadherin-6	sp|P55285|CADH6_HUMAN Cadherin-6 OS=Homo sapiens OX=9606 GN=CDH6 PE=1 SV=1	NA	22.2265	NA	21.3154	22.8765	22.7607	22.9758	NA
CDH9	Q9ULB4	Cadherin-9	sp|Q9ULB4|CADH9_HUMAN Cadherin-9 OS=Homo sapiens OX=9606 GN=CDH9 PE=2 SV=2	NA	NA	NA	NA	NA	NA	21.1521	NA
CDIP1	Q9H305	Cell death-inducing p53-target protein 1	sp|Q9H305|CDIP1_HUMAN Cell death-inducing p53-target protein 1 OS=Homo sapiens OX=9606 GN=CDIP1 PE=1 SV=1	23.4336	23.556	NA	NA	24.4083	NA	NA	NA
CDK14	O94921	Cyclin-dependent kinase 14	sp|O94921|CDK14_HUMAN Cyclin-dependent kinase 14 OS=Homo sapiens OX=9606 GN=CDK14 PE=1 SV=3	22.8158	NA	NA	NA	NA	23.2176	NA	22.7401
CDK16	Q00536	Cyclin-dependent kinase 16	sp|Q00536|CDK16_HUMAN Cyclin-dependent kinase 16 OS=Homo sapiens OX=9606 GN=CDK16 PE=1 SV=1	22.3667	NA	22.5524	22.0162	NA	NA	NA	NA
CDK18	Q07002	Cyclin-dependent kinase 18	sp|Q07002|CDK18_HUMAN Cyclin-dependent kinase 18 OS=Homo sapiens OX=9606 GN=CDK18 PE=1 SV=4	23.9927	23.5949	23.4225	23.832	22.8341	23.4344	24.3051	23.6076
CDK5	Q00535	Cyclin-dependent-like kinase 5	sp|Q00535|CDK5_HUMAN Cyclin-dependent-like kinase 5 OS=Homo sapiens OX=9606 GN=CDK5 PE=1 SV=3	26.8265	26.7325	26.6819	26.5346	25.934	26.7698	27.0153	27.242
CDK5RAP3	Q96JB5	CDK5 regulatory subunit-associated protein 3	sp|Q96JB5|CK5P3_HUMAN CDK5 regulatory subunit-associated protein 3 OS=Homo sapiens OX=9606 GN=CDK5RAP3 PE=1 SV=2	24.1803	23.6398	23.5889	23.3358	24.8957	24.6248	24.3842	24.4082
CDKL5	O76039	Cyclin-dependent kinase-like 5	sp|O76039|CDKL5_HUMAN Cyclin-dependent kinase-like 5 OS=Homo sapiens OX=9606 GN=CDKL5 PE=1 SV=1	23.5828	23.2557	23.9237	NA	23.4165	24.1387	24.6004	24.5953
CDR2L	Q86X02	Cerebellar degeneration-related protein 2-like	sp|Q86X02|CDR2L_HUMAN Cerebellar degeneration-related protein 2-like OS=Homo sapiens OX=9606 GN=CDR2L PE=1 SV=2	NA	NA	NA	22.7537	NA	NA	NA	NA
CDS1	Q92903	Phosphatidate cytidylyltransferase 1	sp|Q92903|CDS1_HUMAN Phosphatidate cytidylyltransferase 1 OS=Homo sapiens OX=9606 GN=CDS1 PE=2 SV=2	21.9163	22.9173	NA	NA	NA	NA	22.0387	NA
CDS2	O95674	Phosphatidate cytidylyltransferase 2	sp|O95674|CDS2_HUMAN Phosphatidate cytidylyltransferase 2 OS=Homo sapiens OX=9606 GN=CDS2 PE=1 SV=1	23.4237	23.5729	23.9818	24.2585	NA	23.8848	23.5663	NA
CDV3	Q9UKY7	Protein CDV3 homolog	sp|Q9UKY7|CDV3_HUMAN Protein CDV3 homolog OS=Homo sapiens OX=9606 GN=CDV3 PE=1 SV=1	NA	22.9086	22.412	23.0953	NA	NA	NA	NA
CELF2	O95319	CUGBP Elav-like family member 2	sp|O95319|CELF2_HUMAN CUGBP Elav-like family member 2 OS=Homo sapiens OX=9606 GN=CELF2 PE=1 SV=1	25.0396	24.8574	24.9151	24.6011	25.2	25.5909	25.9456	25.5532
CELF4	Q9BZC1	CUGBP Elav-like family member 4	sp|Q9BZC1|CELF4_HUMAN CUGBP Elav-like family member 4 OS=Homo sapiens OX=9606 GN=CELF4 PE=1 SV=1	22.3757	22.6706	22.4916	22.1101	23.5768	23.1749	23.4646	23.5934
CELF6	Q96J87	CUGBP Elav-like family member 6	sp|Q96J87|CELF6_HUMAN CUGBP Elav-like family member 6 OS=Homo sapiens OX=9606 GN=CELF6 PE=1 SV=1	NA	NA	NA	NA	22.3885	NA	NA	22.4201
CELSR2	Q9HCU4	Cadherin EGF LAG seven-pass G-type receptor 2	sp|Q9HCU4|CELR2_HUMAN Cadherin EGF LAG seven-pass G-type receptor 2 OS=Homo sapiens OX=9606 GN=CELSR2 PE=1 SV=1	NA	22.3352	NA	NA	NA	NA	NA	NA
CEND1	Q8N111	Cell cycle exit and neuronal differentiation protein 1	sp|Q8N111|CEND_HUMAN Cell cycle exit and neuronal differentiation protein 1 OS=Homo sapiens OX=9606 GN=CEND1 PE=1 SV=1	28.8994	28.6804	28.7328	28.7297	28.9003	28.3065	26.9795	27.4166
CENPV	Q7Z7K6	Centromere protein V	sp|Q7Z7K6|CENPV_HUMAN Centromere protein V OS=Homo sapiens OX=9606 GN=CENPV PE=1 SV=1	NA	NA	22.8758	NA	NA	NA	24.0891	NA
CEP170	Q5SW79	Centrosomal protein of 170 kDa	sp|Q5SW79|CE170_HUMAN Centrosomal protein of 170 kDa OS=Homo sapiens OX=9606 GN=CEP170 PE=1 SV=1	25.4566	25.2079	25.3324	25.4428	26.8209	26.597	26.7925	26.7102
CEP170B	Q9Y4F5	Centrosomal protein of 170 kDa protein B	sp|Q9Y4F5|C170B_HUMAN Centrosomal protein of 170 kDa protein B OS=Homo sapiens OX=9606 GN=CEP170B PE=1 SV=4	25.7983	25.7736	25.9015	25.7673	25.8359	26.6216	26.4887	27.4028
CEP41	Q9BYV8	Centrosomal protein of 41 kDa	sp|Q9BYV8|CEP41_HUMAN Centrosomal protein of 41 kDa OS=Homo sapiens OX=9606 GN=CEP41 PE=1 SV=1	22.7683	23.1163	23.1379	22.9066	NA	22.5352	NA	NA
CERS1	P27544	Ceramide synthase 1	sp|P27544|CERS1_HUMAN Ceramide synthase 1 OS=Homo sapiens OX=9606 GN=CERS1 PE=1 SV=1	NA	NA	23.7906	23.655	NA	23.8562	NA	NA
CETN2	P41208	Centrin-2	sp|P41208|CETN2_HUMAN Centrin-2 OS=Homo sapiens OX=9606 GN=CETN2 PE=1 SV=1	NA	NA	NA	24.2216	NA	NA	NA	23.3246
CFL1	P23528	Cofilin-1	sp|P23528|COF1_HUMAN Cofilin-1 OS=Homo sapiens OX=9606 GN=CFL1 PE=1 SV=3	31.1642	31.5654	31.5907	31.6589	29.6248	30.1734	30.5787	29.6744
CFL2	Q9Y281	Cofilin-2	sp|Q9Y281|COF2_HUMAN Cofilin-2 OS=Homo sapiens OX=9606 GN=CFL2 PE=1 SV=1	27.0557	27.5146	27.2101	27.9007	25.898	25.579	26.1445	24.4893
CHCHD2	Q9Y6H1	Coiled-coil-helix-coiled-coil-helix domain-containing protein 2;Putative coiled-coil-helix-coiled-coil-helix domain-containing protein CHCHD2P9, mitochondrial	sp|Q9Y6H1|CHCH2_HUMAN Coiled-coil-helix-coiled-coil-helix domain-containing protein 2 OS=Homo sapiens OX=9606 GN=CHCHD2 PE=1 SV=1;sp|Q5T1J5|CHCH9_HUMAN Putative coiled-coil-helix-coiled-coil-helix domain-containing protein CHCHD2P9, mitochondrial OS=Homo s	NA	NA	NA	22.1447	NA	NA	NA	NA
CHCHD3	Q9NX63	MICOS complex subunit MIC19	sp|Q9NX63|MIC19_HUMAN MICOS complex subunit MIC19 OS=Homo sapiens OX=9606 GN=CHCHD3 PE=1 SV=1	28.2108	27.716	27.7554	27.9573	28.7061	28.3846	29.2395	29.2114
CHCHD4	Q8N4Q1	Mitochondrial intermembrane space import and assembly protein 40	sp|Q8N4Q1|MIA40_HUMAN Mitochondrial intermembrane space import and assembly protein 40 OS=Homo sapiens OX=9606 GN=CHCHD4 PE=1 SV=1	NA	23.6114	23.9224	24.401	NA	NA	NA	NA
CHCHD6	Q9BRQ6	MICOS complex subunit MIC25	sp|Q9BRQ6|MIC25_HUMAN MICOS complex subunit MIC25 OS=Homo sapiens OX=9606 GN=CHCHD6 PE=1 SV=1	25.5138	24.885	25.3789	25.0385	25.3858	25.0476	26.2077	26.2278
CHD4	Q14839	Chromodomain-helicase-DNA-binding protein 4	sp|Q14839|CHD4_HUMAN Chromodomain-helicase-DNA-binding protein 4 OS=Homo sapiens OX=9606 GN=CHD4 PE=1 SV=2	NA	NA	NA	NA	23.0143	NA	NA	24.5928
CHDH	Q8NE62	Choline dehydrogenase, mitochondrial	sp|Q8NE62|CHDH_HUMAN Choline dehydrogenase, mitochondrial OS=Homo sapiens OX=9606 GN=CHDH PE=1 SV=2	22.6323	23.0099	23.2275	23.1809	NA	NA	NA	23.2299
CHGB	P05060	Secretogranin-1;PE-11;GAWK peptide;CCB peptide	sp|P05060|SCG1_HUMAN Secretogranin-1 OS=Homo sapiens OX=9606 GN=CHGB PE=1 SV=2	23.2344	NA	22.9807	23.197	NA	NA	NA	NA
CHL1	O00533	Neural cell adhesion molecule L1-like protein;Processed neural cell adhesion molecule L1-like protein	sp|O00533|NCHL1_HUMAN Neural cell adhesion molecule L1-like protein OS=Homo sapiens OX=9606 GN=CHL1 PE=1 SV=4	25.272	25.6318	25.5344	25.2172	24.3477	24.5486	25.5339	24.728
CHM	P24386	Rab proteins geranylgeranyltransferase component A 1	sp|P24386|RAE1_HUMAN Rab proteins geranylgeranyltransferase component A 1 OS=Homo sapiens OX=9606 GN=CHM PE=1 SV=3	23.4468	22.9858	NA	23.1489	NA	23.332	NA	NA
CHMP1A	Q9HD42	Charged multivesicular body protein 1a	sp|Q9HD42|CHM1A_HUMAN Charged multivesicular body protein 1a OS=Homo sapiens OX=9606 GN=CHMP1A PE=1 SV=1	23.9445	23.3192	23.9039	23.9792	23.7246	23.0853	23.4775	24.7256
CHMP1B	Q7LBR1	Charged multivesicular body protein 1b	sp|Q7LBR1|CHM1B_HUMAN Charged multivesicular body protein 1b OS=Homo sapiens OX=9606 GN=CHMP1B PE=1 SV=1	23.9674	NA	NA	23.0151	23.1758	23.3017	NA	NA
CHMP2A	O43633	Charged multivesicular body protein 2a	sp|O43633|CHM2A_HUMAN Charged multivesicular body protein 2a OS=Homo sapiens OX=9606 GN=CHMP2A PE=1 SV=1	25.0896	24.9303	25.4859	24.9786	24.8401	23.987	25.7705	25.2459
CHMP2B	Q9UQN3	Charged multivesicular body protein 2b	sp|Q9UQN3|CHM2B_HUMAN Charged multivesicular body protein 2b OS=Homo sapiens OX=9606 GN=CHMP2B PE=1 SV=1	24.1064	24.2106	24.2487	24.2324	24.3042	NA	23.327	24.3576
CHMP3	Q9Y3E7	Charged multivesicular body protein 3	sp|Q9Y3E7|CHMP3_HUMAN Charged multivesicular body protein 3 OS=Homo sapiens OX=9606 GN=CHMP3 PE=1 SV=3	24.1543	23.9984	24.2532	23.7821	NA	23.6238	NA	NA
CHMP4B	Q9H444	Charged multivesicular body protein 4b	sp|Q9H444|CHM4B_HUMAN Charged multivesicular body protein 4b OS=Homo sapiens OX=9606 GN=CHMP4B PE=1 SV=1	27.4083	27.0597	27.2506	27.487	25.9975	25.8959	27.1037	27.5356
CHMP5	Q9NZZ3	Charged multivesicular body protein 5	sp|Q9NZZ3|CHMP5_HUMAN Charged multivesicular body protein 5 OS=Homo sapiens OX=9606 GN=CHMP5 PE=1 SV=1	24.7355	24.5584	24.7653	24.1137	24.9562	25.1854	25.7694	24.4904
CHMP6	Q96FZ7	Charged multivesicular body protein 6	sp|Q96FZ7|CHMP6_HUMAN Charged multivesicular body protein 6 OS=Homo sapiens OX=9606 GN=CHMP6 PE=1 SV=3	25.4545	25.4668	25.3556	25.8148	25.5082	25.4731	25.8365	25.98
CHN1	P15882	N-chimaerin	sp|P15882|CHIN_HUMAN N-chimaerin OS=Homo sapiens OX=9606 GN=CHN1 PE=1 SV=3	23.6204	23.9843	23.8701	23.7901	23.4568	23.7812	24.3844	23.5843
CHN2	P52757	Beta-chimaerin	sp|P52757|CHIO_HUMAN Beta-chimaerin OS=Homo sapiens OX=9606 GN=CHN2 PE=1 SV=2	NA	NA	23.4858	NA	NA	24.2403	23.7284	NA
CHORDC1	Q9UHD1	Cysteine and histidine-rich domain-containing protein 1	sp|Q9UHD1|CHRD1_HUMAN Cysteine and histidine-rich domain-containing protein 1 OS=Homo sapiens OX=9606 GN=CHORDC1 PE=1 SV=2	23.6436	23.4675	23.6845	23.7712	NA	NA	NA	NA
CHP1	Q99653	Calcineurin B homologous protein 1	sp|Q99653|CHP1_HUMAN Calcineurin B homologous protein 1 OS=Homo sapiens OX=9606 GN=CHP1 PE=1 SV=3	25.0625	24.9414	24.4835	25.1978	23.1248	23.8369	23.8989	24.0619
CIAPIN1	Q6FI81	Anamorsin	sp|Q6FI81|CPIN1_HUMAN Anamorsin OS=Homo sapiens OX=9606 GN=CIAPIN1 PE=1 SV=2	23.1855	23.3045	22.9455	23.8827	NA	23.3543	23.1825	NA
CIRBP	Q14011	Cold-inducible RNA-binding protein	sp|Q14011|CIRBP_HUMAN Cold-inducible RNA-binding protein OS=Homo sapiens OX=9606 GN=CIRBP PE=1 SV=1	24.4158	25.2436	25.0859	24.7047	23.8665	24.1104	24.6027	26.9005
CISD1	Q9NZ45	CDGSH iron-sulfur domain-containing protein 1	sp|Q9NZ45|CISD1_HUMAN CDGSH iron-sulfur domain-containing protein 1 OS=Homo sapiens OX=9606 GN=CISD1 PE=1 SV=1	27.1649	26.538	26.5042	26.6714	26.8179	27.0205	27.6494	25.8142
CIT	O14578	Citron Rho-interacting kinase	sp|O14578|CTRO_HUMAN Citron Rho-interacting kinase OS=Homo sapiens OX=9606 GN=CIT PE=1 SV=2	26.1423	26.0838	25.8551	26.1513	26.2765	27.4622	26.8142	26.307
CKAP4	Q07065	Cytoskeleton-associated protein 4	sp|Q07065|CKAP4_HUMAN Cytoskeleton-associated protein 4 OS=Homo sapiens OX=9606 GN=CKAP4 PE=1 SV=2	25.8472	25.5919	25.8357	25.3869	28.0112	26.3812	25.3417	26.4475
CKAP5	Q14008	Cytoskeleton-associated protein 5	sp|Q14008|CKAP5_HUMAN Cytoskeleton-associated protein 5 OS=Homo sapiens OX=9606 GN=CKAP5 PE=1 SV=3	26.8783	27.3494	27.352	27.1014	26.8107	27.5077	27.6503	26.8713
CKB	P12277	Creatine kinase B-type	sp|P12277|KCRB_HUMAN Creatine kinase B-type OS=Homo sapiens OX=9606 GN=CKB PE=1 SV=1	32.5935	32.5715	32.2045	33.115	33.4508	33.5004	33.6274	33.6059
CKMT1A	P12532	Creatine kinase U-type, mitochondrial	sp|P12532|KCRU_HUMAN Creatine kinase U-type, mitochondrial OS=Homo sapiens OX=9606 GN=CKMT1A PE=1 SV=1	29.7829	29.9134	29.9393	30.0058	27.9655	28.7986	29.4024	29.3758
CLASP1	Q7Z460	CLIP-associating protein 1	sp|Q7Z460|CLAP1_HUMAN CLIP-associating protein 1 OS=Homo sapiens OX=9606 GN=CLASP1 PE=1 SV=1	25.3386	25.4757	25.4172	25.7762	25.4678	25.8113	25.941	24.8476
CLASP2	O75122	CLIP-associating protein 2	sp|O75122|CLAP2_HUMAN CLIP-associating protein 2 OS=Homo sapiens OX=9606 GN=CLASP2 PE=1 SV=3	27.2173	27.4329	27.508	27.4898	27.2454	27.884	27.6476	27.1322
CLCN4	P51793	H(+)/Cl(-) exchange transporter 4	sp|P51793|CLCN4_HUMAN H(+)/Cl(-) exchange transporter 4 OS=Homo sapiens OX=9606 GN=CLCN4 PE=1 SV=2	NA	20.8982	NA	NA	NA	NA	NA	NA
CLCN6	P51797	Chloride transport protein 6	sp|P51797|CLCN6_HUMAN Chloride transport protein 6 OS=Homo sapiens OX=9606 GN=CLCN6 PE=1 SV=2	21.9359	22.3962	22.2984	NA	22.932	22.123	21.4709	22.4095
CLIC1	O00299	Chloride intracellular channel protein 1	sp|O00299|CLIC1_HUMAN Chloride intracellular channel protein 1 OS=Homo sapiens OX=9606 GN=CLIC1 PE=1 SV=4	24.1308	24.4573	24.1497	24.1488	26.0022	24.3677	25.1134	NA
CLIC4	Q9Y696	Chloride intracellular channel protein 4	sp|Q9Y696|CLIC4_HUMAN Chloride intracellular channel protein 4 OS=Homo sapiens OX=9606 GN=CLIC4 PE=1 SV=4	26.2773	26.6016	26.4061	27.4358	27.4708	26.1795	26.009	24.6171
CLINT1	Q14677	Clathrin interactor 1	sp|Q14677|EPN4_HUMAN Clathrin interactor 1 OS=Homo sapiens OX=9606 GN=CLINT1 PE=1 SV=1	24.327	23.8115	24.1881	24.4483	24.8472	24.1053	24.4419	23.9427
CLIP1	P30622	CAP-Gly domain-containing linker protein 1	sp|P30622|CLIP1_HUMAN CAP-Gly domain-containing linker protein 1 OS=Homo sapiens OX=9606 GN=CLIP1 PE=1 SV=2	24.8665	24.6559	25.0044	24.6879	24.3968	24.8282	24.2518	23.247
CLIP2	Q9UDT6	CAP-Gly domain-containing linker protein 2	sp|Q9UDT6|CLIP2_HUMAN CAP-Gly domain-containing linker protein 2 OS=Homo sapiens OX=9606 GN=CLIP2 PE=1 SV=1	26.657	26.8206	26.9234	26.9998	25.833	27.08	26.4554	26.294
CLPB	Q9H078	Caseinolytic peptidase B protein homolog	sp|Q9H078|CLPB_HUMAN Caseinolytic peptidase B protein homolog OS=Homo sapiens OX=9606 GN=CLPB PE=1 SV=1	23.3504	23.3667	23.3239	23.465	NA	23.9113	NA	NA
CLPTM1	O96005	Cleft lip and palate transmembrane protein 1	sp|O96005|CLPT1_HUMAN Cleft lip and palate transmembrane protein 1 OS=Homo sapiens OX=9606 GN=CLPTM1 PE=1 SV=1	23.7001	24.1556	24.4108	23.9715	23.6835	24.1489	NA	24.8143
CLSTN1	O94985	Calsyntenin-1;Soluble Alc-alpha;CTF1-alpha	sp|O94985|CSTN1_HUMAN Calsyntenin-1 OS=Homo sapiens OX=9606 GN=CLSTN1 PE=1 SV=1	24.3982	24.1516	24.251	23.9327	NA	23.4963	24.1779	NA
CLTA	P09496	Clathrin light chain A	sp|P09496|CLCA_HUMAN Clathrin light chain A OS=Homo sapiens OX=9606 GN=CLTA PE=1 SV=1	28.211	27.8466	27.8191	28.0696	27.2413	27.6555	28.1534	27.5085
CLTB	P09497	Clathrin light chain B	sp|P09497|CLCB_HUMAN Clathrin light chain B OS=Homo sapiens OX=9606 GN=CLTB PE=1 SV=1	28.416	28.5282	28.5067	28.7323	26.4396	27.005	27.1482	28.6809
CLTC	Q00610	Clathrin heavy chain 1	sp|Q00610|CLH1_HUMAN Clathrin heavy chain 1 OS=Homo sapiens OX=9606 GN=CLTC PE=1 SV=5	32.2158	32.2433	32.248	32.0677	32.3745	32.5992	32.4777	32.1835
CLTCL1	P53675	Clathrin heavy chain 2	sp|P53675|CLH2_HUMAN Clathrin heavy chain 2 OS=Homo sapiens OX=9606 GN=CLTCL1 PE=1 SV=2	NA	NA	23.6372	23.8393	NA	22.8873	NA	NA
CLU	P10909	Clusterin;Clusterin beta chain;Clusterin alpha chain	sp|P10909|CLUS_HUMAN Clusterin OS=Homo sapiens OX=9606 GN=CLU PE=1 SV=1	28.0389	27.7376	27.7176	27.893	29.4435	27.5215	28.0331	27.8869
CLUH	O75153	Clustered mitochondria protein homolog	sp|O75153|CLU_HUMAN Clustered mitochondria protein homolog OS=Homo sapiens OX=9606 GN=CLUH PE=1 SV=2	NA	22.122	22.3919	22.1602	NA	NA	NA	NA
CLVS2	Q5SYC1	Clavesin-2	sp|Q5SYC1|CLVS2_HUMAN Clavesin-2 OS=Homo sapiens OX=9606 GN=CLVS2 PE=2 SV=1	22.5209	NA	NA	NA	23.2487	NA	23.473	23.0832
CMAS	Q8NFW8	N-acylneuraminate cytidylyltransferase	sp|Q8NFW8|NEUA_HUMAN N-acylneuraminate cytidylyltransferase OS=Homo sapiens OX=9606 GN=CMAS PE=1 SV=2	24.5562	24.51	24.8154	24.6455	24.0651	24.5877	23.6445	23.4554
CMBL	Q96DG6	Carboxymethylenebutenolidase homolog	sp|Q96DG6|CMBL_HUMAN Carboxymethylenebutenolidase homolog OS=Homo sapiens OX=9606 GN=CMBL PE=1 SV=1	NA	23.9306	23.6909	24.4943	NA	23.9037	24.1388	NA
CMPK1	P30085	UMP-CMP kinase	sp|P30085|KCY_HUMAN UMP-CMP kinase OS=Homo sapiens OX=9606 GN=CMPK1 PE=1 SV=3	27.7449	27.6962	27.8849	28.0628	28.2654	28.0466	28.1113	28.1521
CNDP2	Q96KP4	Cytosolic non-specific dipeptidase	sp|Q96KP4|CNDP2_HUMAN Cytosolic non-specific dipeptidase OS=Homo sapiens OX=9606 GN=CNDP2 PE=1 SV=2	27.4267	27.4868	27.003	28.6028	26.6189	27.8348	27.6196	26.367
CNKSR2	Q8WXI2	Connector enhancer of kinase suppressor of ras 2	sp|Q8WXI2|CNKR2_HUMAN Connector enhancer of kinase suppressor of ras 2 OS=Homo sapiens OX=9606 GN=CNKSR2 PE=1 SV=1	24.1521	24.7396	24.5836	23.8189	24.1568	25.467	24.9986	24.9461
CNKSR3	G9CGD6	Interactor protein for cytohesin exchange factors 1	sp|G9CGD6|CNIPF_HUMAN CNK3/IPCEF1 fusion protein OS=Homo sapiens OX=9606 GN=CNK3/IPCEF1 PE=1 SV=1;sp|Q8WWN9|ICEF1_HUMAN Interactor protein for cytohesin exchange factors 1 OS=Homo sapiens OX=9606 GN=IPCEF1 PE=1 SV=1	NA	NA	NA	NA	NA	NA	23.7293	NA
CNN3	Q15417	Calponin-3	sp|Q15417|CNN3_HUMAN Calponin-3 OS=Homo sapiens OX=9606 GN=CNN3 PE=1 SV=1	24.7615	24.5071	25.1006	25.1254	24.8797	25.0538	24.9072	NA
CNOT1	A5YKK6	CCR4-NOT transcription complex subunit 1	sp|A5YKK6|CNOT1_HUMAN CCR4-NOT transcription complex subunit 1 OS=Homo sapiens OX=9606 GN=CNOT1 PE=1 SV=2	22.7308	22.6461	22.9186	22.8184	23.033	22.4389	23.3185	22.5047
CNP	P09543	2,3-cyclic-nucleotide 3-phosphodiesterase	sp|P09543|CN37_HUMAN 2,3-cyclic-nucleotide 3-phosphodiesterase OS=Homo sapiens OX=9606 GN=CNP PE=1 SV=2	32.5147	32.6743	32.7979	33.3998	32.7216	31.4926	31.9589	31.1371
CNPY2	Q9Y2B0	Protein canopy homolog 2	sp|Q9Y2B0|CNPY2_HUMAN Protein canopy homolog 2 OS=Homo sapiens OX=9606 GN=CNPY2 PE=1 SV=1	23.9069	23.7234	23.4584	NA	25.0408	25.1147	25.1131	24.0781
CNRIP1	Q96F85	CB1 cannabinoid receptor-interacting protein 1	sp|Q96F85|CNRP1_HUMAN CB1 cannabinoid receptor-interacting protein 1 OS=Homo sapiens OX=9606 GN=CNRIP1 PE=1 SV=1	26.6326	25.8556	24.6405	26.4308	27.5939	28.0434	28.8622	27.2771
CNTN1	Q12860	Contactin-1	sp|Q12860|CNTN1_HUMAN Contactin-1 OS=Homo sapiens OX=9606 GN=CNTN1 PE=1 SV=1	30.9034	31.032	31.1153	31.0714	30.7046	31.4674	31.2958	30.9156
CNTN2	Q02246	Contactin-2	sp|Q02246|CNTN2_HUMAN Contactin-2 OS=Homo sapiens OX=9606 GN=CNTN2 PE=1 SV=1	24.87	25.8566	25.503	25.7689	24.2816	24.4924	24.679	23.1939
CNTN4	Q8IWV2	Contactin-4	sp|Q8IWV2|CNTN4_HUMAN Contactin-4 OS=Homo sapiens OX=9606 GN=CNTN4 PE=1 SV=1	23.2999	23.8289	23.9149	22.6099	NA	23.9258	24.8488	24.0687
CNTNAP1	P78357	Contactin-associated protein 1	sp|P78357|CNTP1_HUMAN Contactin-associated protein 1 OS=Homo sapiens OX=9606 GN=CNTNAP1 PE=1 SV=1	27.5692	28.2464	28.1993	28.436	28.0419	27.4988	27.9998	28.3704
CNTNAP2	Q9UHC6	Contactin-associated protein-like 2	sp|Q9UHC6|CNTP2_HUMAN Contactin-associated protein-like 2 OS=Homo sapiens OX=9606 GN=CNTNAP2 PE=1 SV=1	25.57	25.9882	25.8583	25.9202	25.5904	26.3479	25.1962	25.443
CNTNAP5	Q8WYK1	Contactin-associated protein-like 5	sp|Q8WYK1|CNTP5_HUMAN Contactin-associated protein-like 5 OS=Homo sapiens OX=9606 GN=CNTNAP5 PE=2 SV=1	23.2498	23.5365	23.6239	23.3206	NA	23.5681	23.6863	NA
COA3	Q9Y2R0	Cytochrome c oxidase assembly factor 3 homolog, mitochondrial	sp|Q9Y2R0|COA3_HUMAN Cytochrome c oxidase assembly factor 3 homolog, mitochondrial OS=Homo sapiens OX=9606 GN=COA3 PE=1 SV=1	25.2941	25.0317	24.8296	25.3084	25.6585	25.4677	25.6441	26.1573
COASY	Q13057	Bifunctional coenzyme A synthase;Phosphopantetheine adenylyltransferase;Dephospho-CoA kinase	sp|Q13057|COASY_HUMAN Bifunctional coenzyme A synthase OS=Homo sapiens OX=9606 GN=COASY PE=1 SV=4	24.6031	24.0394	23.8187	24.2081	25.4768	24.6427	24.4773	25.3299
COBL	O75128	Protein cordon-bleu	sp|O75128|COBL_HUMAN Protein cordon-bleu OS=Homo sapiens OX=9606 GN=COBL PE=1 SV=2	NA	NA	NA	NA	NA	NA	NA	20.6616
COL12A1	Q99715	Collagen alpha-1(XII) chain	sp|Q99715|COCA1_HUMAN Collagen alpha-1(XII) chain OS=Homo sapiens OX=9606 GN=COL12A1 PE=1 SV=2	NA	NA	NA	NA	25.9175	NA	NA	NA
COL18A1	P39060	Collagen alpha-1(XVIII) chain;Endostatin	sp|P39060|COIA1_HUMAN Collagen alpha-1(XVIII) chain OS=Homo sapiens OX=9606 GN=COL18A1 PE=1 SV=5	NA	NA	NA	NA	26.4921	NA	NA	NA
COL1A2	P08123	Collagen alpha-2(I) chain	sp|P08123|CO1A2_HUMAN Collagen alpha-2(I) chain OS=Homo sapiens OX=9606 GN=COL1A2 PE=1 SV=7	NA	NA	NA	NA	24.2285	24.1144	NA	NA
COL4A2	P08572	Collagen alpha-2(IV) chain;Canstatin	sp|P08572|CO4A2_HUMAN Collagen alpha-2(IV) chain OS=Homo sapiens OX=9606 GN=COL4A2 PE=1 SV=4	23.7898	25.1069	24.5163	24.8118	25.8812	25.5792	25.3316	25.2145
COL6A1	P12109	Collagen alpha-1(VI) chain	sp|P12109|CO6A1_HUMAN Collagen alpha-1(VI) chain OS=Homo sapiens OX=9606 GN=COL6A1 PE=1 SV=3	22.1155	23.1499	NA	22.9516	26.6915	22.1318	NA	NA
COL6A2	P12110	Collagen alpha-2(VI) chain	sp|P12110|CO6A2_HUMAN Collagen alpha-2(VI) chain OS=Homo sapiens OX=9606 GN=COL6A2 PE=1 SV=4	NA	NA	NA	NA	25.3787	NA	NA	NA
COL6A3	P12111	Collagen alpha-3(VI) chain	sp|P12111|CO6A3_HUMAN Collagen alpha-3(VI) chain OS=Homo sapiens OX=9606 GN=COL6A3 PE=1 SV=5	23.5453	23.1012	22.7368	24.2439	29.0293	23.722	23.9684	23.5259
COMMD10	Q9Y6G5	COMM domain-containing protein 10	sp|Q9Y6G5|COMDA_HUMAN COMM domain-containing protein 10 OS=Homo sapiens OX=9606 GN=COMMD10 PE=1 SV=1	22.4717	NA	NA	22.2335	NA	NA	NA	NA
COMMD3	Q9UBI1	COMM domain-containing protein 3	sp|Q9UBI1|COMD3_HUMAN COMM domain-containing protein 3 OS=Homo sapiens OX=9606 GN=COMMD3 PE=1 SV=1	23.0782	22.9347	22.9982	22.4633	NA	23.0262	NA	23.2152
COMMD7	Q86VX2	COMM domain-containing protein 7	sp|Q86VX2|COMD7_HUMAN COMM domain-containing protein 7 OS=Homo sapiens OX=9606 GN=COMMD7 PE=1 SV=2	NA	NA	22.5716	22.3784	NA	NA	NA	NA
COMT	P21964	Catechol O-methyltransferase	sp|P21964|COMT_HUMAN Catechol O-methyltransferase OS=Homo sapiens OX=9606 GN=COMT PE=1 SV=2	23.7206	24.0763	23.9837	25.0861	NA	24.0408	23.8345	24.4729
COPA	P53621	Coatomer subunit alpha;Xenin;Proxenin	sp|P53621|COPA_HUMAN Coatomer subunit alpha OS=Homo sapiens OX=9606 GN=COPA PE=1 SV=2	25.6396	25.7717	25.9045	25.8856	26.9193	26.173	26.2747	26.0493
COPB1	P53618	Coatomer subunit beta	sp|P35606|COPB2_HUMAN Coatomer subunit beta OS=Homo sapiens OX=9606 GN=COPB2 PE=1 SV=2	24.5513	24.5626	24.8294	24.4253	25.2106	24.6946	25.0184	24.0493
COPB2	P35606	Coatomer subunit beta	sp|P35606|COPB2_HUMAN Coatomer subunit beta OS=Homo sapiens OX=9606 GN=COPB2 PE=1 SV=2	24.5513	24.5626	24.8294	24.4253	25.2106	24.6946	25.0184	24.0493
COPE	O14579	Coatomer subunit epsilon	sp|O14579|COPE_HUMAN Coatomer subunit epsilon OS=Homo sapiens OX=9606 GN=COPE PE=1 SV=3	25.234	25.311	25.5546	25.2273	25.5948	25.1281	25.2843	24.7993
COPG1	Q9Y678	Coatomer subunit gamma-1	sp|Q9Y678|COPG1_HUMAN Coatomer subunit gamma-1 OS=Homo sapiens OX=9606 GN=COPG1 PE=1 SV=1	25.366	25.4849	25.6576	25.0694	26.4627	25.7822	26.1706	26.0682
COPG2	Q9UBF2	Coatomer subunit gamma-2	sp|Q9UBF2|COPG2_HUMAN Coatomer subunit gamma-2 OS=Homo sapiens OX=9606 GN=COPG2 PE=1 SV=1	NA	NA	22.7483	22.6339	NA	23.0337	NA	NA
COPS2	P61201	COP9 signalosome complex subunit 2	sp|P61201|CSN2_HUMAN COP9 signalosome complex subunit 2 OS=Homo sapiens OX=9606 GN=COPS2 PE=1 SV=1	26.1505	26.3982	26.2453	26.3172	25.3397	26.1889	26.7325	26.3371
COPS3	Q9UNS2	COP9 signalosome complex subunit 3	sp|Q9UNS2|CSN3_HUMAN COP9 signalosome complex subunit 3 OS=Homo sapiens OX=9606 GN=COPS3 PE=1 SV=3	25.1927	25.2638	25.2952	25.3227	23.6857	25.0849	24.8962	24.3893
COPS4	Q9BT78	COP9 signalosome complex subunit 4	sp|Q9BT78|CSN4_HUMAN COP9 signalosome complex subunit 4 OS=Homo sapiens OX=9606 GN=COPS4 PE=1 SV=1	26.3764	26.7146	26.6952	26.4889	25.0673	26.0358	25.8813	26.073
COPS5	Q92905	COP9 signalosome complex subunit 5	sp|Q92905|CSN5_HUMAN COP9 signalosome complex subunit 5 OS=Homo sapiens OX=9606 GN=COPS5 PE=1 SV=4	23.9279	24.3922	24.4524	25.0057	NA	NA	23.0398	22.8187
COPS6	Q7L5N1	COP9 signalosome complex subunit 6	sp|Q7L5N1|CSN6_HUMAN COP9 signalosome complex subunit 6 OS=Homo sapiens OX=9606 GN=COPS6 PE=1 SV=1	24.4298	24.3018	24.0074	24.3717	NA	23.9332	24.4844	24.448
COPS7A	Q9UBW8	COP9 signalosome complex subunit 7a	sp|Q9UBW8|CSN7A_HUMAN COP9 signalosome complex subunit 7a OS=Homo sapiens OX=9606 GN=COPS7A PE=1 SV=1	25.2287	25.4565	25.3454	25.3289	NA	24.332	24.6275	23.7989
COPS8	Q99627	COP9 signalosome complex subunit 8	sp|Q99627|CSN8_HUMAN COP9 signalosome complex subunit 8 OS=Homo sapiens OX=9606 GN=COPS8 PE=1 SV=1	25.5622	25.5578	25.5349	25.5946	25.1257	25.3418	26.3306	25.3378
COPZ1	P61923	Coatomer subunit zeta-1	sp|P61923|COPZ1_HUMAN Coatomer subunit zeta-1 OS=Homo sapiens OX=9606 GN=COPZ1 PE=1 SV=1	23.6272	23.6247	23.7159	23.4007	23.7497	23.3292	24.1694	23.4225
COQ3	Q9NZJ6	Ubiquinone biosynthesis O-methyltransferase, mitochondrial	sp|Q9NZJ6|COQ3_HUMAN Ubiquinone biosynthesis O-methyltransferase, mitochondrial OS=Homo sapiens OX=9606 GN=COQ3 PE=1 SV=3	NA	NA	NA	23.7409	NA	NA	NA	NA
COQ5	Q5HYK3	2-methoxy-6-polyprenyl-1,4-benzoquinol methylase, mitochondrial	sp|Q5HYK3|COQ5_HUMAN 2-methoxy-6-polyprenyl-1,4-benzoquinol methylase, mitochondrial OS=Homo sapiens OX=9606 GN=COQ5 PE=1 SV=2	NA	NA	NA	22.6965	22.4912	NA	NA	NA
COQ6	Q9Y2Z9	Ubiquinone biosynthesis monooxygenase COQ6, mitochondrial	sp|Q9Y2Z9|COQ6_HUMAN Ubiquinone biosynthesis monooxygenase COQ6, mitochondrial OS=Homo sapiens OX=9606 GN=COQ6 PE=1 SV=2	22.9828	23.1574	22.7606	23.0553	NA	22.5136	22.5714	NA
COQ7	Q99807	5-demethoxyubiquinone hydroxylase, mitochondrial	sp|Q99807|COQ7_HUMAN 5-demethoxyubiquinone hydroxylase, mitochondrial OS=Homo sapiens OX=9606 GN=COQ7 PE=1 SV=3	23.5477	23.4759	22.86	23.3016	NA	NA	NA	23.2536
COQ9	O75208	Ubiquinone biosynthesis protein COQ9, mitochondrial	sp|O75208|COQ9_HUMAN Ubiquinone biosynthesis protein COQ9, mitochondrial OS=Homo sapiens OX=9606 GN=COQ9 PE=1 SV=1	24.8769	24.936	24.8073	24.7326	25.1255	25.0059	22.3751	25.0225
CORO1A	P31146	Coronin-1A	sp|P31146|COR1A_HUMAN Coronin-1A OS=Homo sapiens OX=9606 GN=CORO1A PE=1 SV=4	29.211	28.869	28.9632	29.2121	29.1338	29.9024	30.0687	28.4167
CORO1B	Q9BR76	Coronin-1B	sp|Q9BR76|COR1B_HUMAN Coronin-1B OS=Homo sapiens OX=9606 GN=CORO1B PE=1 SV=1	25.1612	25.5132	25.3582	25.337	24.8222	24.8652	24.8279	24.9253
CORO1C	Q9ULV4	Coronin-1C	sp|Q9ULV4|COR1C_HUMAN Coronin-1C OS=Homo sapiens OX=9606 GN=CORO1C PE=1 SV=1	26.2628	26.0479	26.1689	25.7544	26.3082	25.9578	26.497	24.7905
CORO2A	Q92828	Coronin-2A	sp|Q92828|COR2A_HUMAN Coronin-2A OS=Homo sapiens OX=9606 GN=CORO2A PE=1 SV=2	NA	22.7971	22.5986	22.6469	NA	NA	21.0819	NA
CORO2B	Q9UQ03	Coronin-2B	sp|Q9UQ03|COR2B_HUMAN Coronin-2B OS=Homo sapiens OX=9606 GN=CORO2B PE=1 SV=4	26.7274	26.7098	26.8255	26.5166	26.3483	27.045	27.1007	26.9096
CORO7	P57737	Coronin-7	sp|P57737|CORO7_HUMAN Coronin-7 OS=Homo sapiens OX=9606 GN=CORO7 PE=1 SV=2	23.1123	23.5925	23.9242	23.2209	23.7242	23.94	24.0009	24.6727
COTL1	Q14019	Coactosin-like protein	sp|Q14019|COTL1_HUMAN Coactosin-like protein OS=Homo sapiens OX=9606 GN=COTL1 PE=1 SV=3	26.982	27.4854	27.2049	27.4293	26.6294	25.5769	24.1113	25.1231
COX4I1	P13073	Cytochrome c oxidase subunit 4 isoform 1, mitochondrial	sp|P13073|COX41_HUMAN Cytochrome c oxidase subunit 4 isoform 1, mitochondrial OS=Homo sapiens OX=9606 GN=COX4I1 PE=1 SV=1	29.1024	29.0834	29.0142	28.8112	28.9088	29.4185	29.6126	28.35
COX5A	P20674	Cytochrome c oxidase subunit 5A, mitochondrial	sp|P20674|COX5A_HUMAN Cytochrome c oxidase subunit 5A, mitochondrial OS=Homo sapiens OX=9606 GN=COX5A PE=1 SV=2	28.8134	28.671	29.0791	29.1948	27.3964	27.5593	28.4297	29.4618
COX5B	P10606	Cytochrome c oxidase subunit 5B, mitochondrial	sp|P10606|COX5B_HUMAN Cytochrome c oxidase subunit 5B, mitochondrial OS=Homo sapiens OX=9606 GN=COX5B PE=1 SV=2	27.5565	27.7049	27.6572	28.6213	27.7676	27.9119	28.9686	28.6948
COX6B1	P14854	Cytochrome c oxidase subunit 6B1	sp|P14854|CX6B1_HUMAN Cytochrome c oxidase subunit 6B1 OS=Homo sapiens OX=9606 GN=COX6B1 PE=1 SV=2	23.3288	NA	NA	NA	24.1555	23.9338	23.939	23.9864
COX6C	P09669	Cytochrome c oxidase subunit 6C	sp|P09669|COX6C_HUMAN Cytochrome c oxidase subunit 6C OS=Homo sapiens OX=9606 GN=COX6C PE=1 SV=2	29.123	28.6623	29.1045	28.3765	29.7256	29.4917	30.2145	30.4489
COX7A1	P24310	Cytochrome c oxidase subunit 7A1, mitochondrial	sp|P24310|CX7A1_HUMAN Cytochrome c oxidase subunit 7A1, mitochondrial OS=Homo sapiens OX=9606 GN=COX7A1 PE=1 SV=2	24.9517	24.7911	24.9736	25.9198	25.3445	NA	23.5729	24.4121
COX7A2	P14406	Cytochrome c oxidase subunit 7A2, mitochondrial	sp|P14406|CX7A2_HUMAN Cytochrome c oxidase subunit 7A2, mitochondrial OS=Homo sapiens OX=9606 GN=COX7A2 PE=1 SV=1	29.2963	29.282	29.0088	29.1141	30.0421	29.5282	30.0161	30.1559
COX7A2L	O14548	Cytochrome c oxidase subunit 7A-related protein, mitochondrial	sp|O14548|COX7R_HUMAN Cytochrome c oxidase subunit 7A-related protein, mitochondrial OS=Homo sapiens OX=9606 GN=COX7A2L PE=1 SV=2	27.5995	27.3758	27.5502	27.6971	27.0552	26.9597	27.8129	27.3231
COX7C	P15954	Cytochrome c oxidase subunit 7C, mitochondrial	sp|P15954|COX7C_HUMAN Cytochrome c oxidase subunit 7C, mitochondrial OS=Homo sapiens OX=9606 GN=COX7C PE=1 SV=1	26.3352	26.264	26.4058	25.0098	26.055	26.1481	26.7567	26.0779
CPE	P16870	Carboxypeptidase E	sp|P16870|CBPE_HUMAN Carboxypeptidase E OS=Homo sapiens OX=9606 GN=CPE PE=1 SV=1	24.095	24.4975	23.8549	24.8123	NA	22.9109	23.9208	23.9708
CPEB4	Q17RY0	Cytoplasmic polyadenylation element-binding protein 4;Cytoplasmic polyadenylation element-binding protein 2;Cytoplasmic polyadenylation element-binding protein 3	sp|Q17RY0|CPEB4_HUMAN Cytoplasmic polyadenylation element-binding protein 4 OS=Homo sapiens OX=9606 GN=CPEB4 PE=1 SV=1;sp|Q7Z5Q1|CPEB2_HUMAN Cytoplasmic polyadenylation element-binding protein 2 OS=Homo sapiens OX=9606 GN=CPEB2 PE=2 SV=3;sp|Q8NE35|CPEB3_HU	23.9803	24.3799	23.9867	24.1725	24.6333	24.5247	24.3186	NA
CPLX1	O14810	Complexin-1	sp|O14810|CPLX1_HUMAN Complexin-1 OS=Homo sapiens OX=9606 GN=CPLX1 PE=1 SV=1	23.8786	24.6297	24.7866	25.6763	24.1086	23.0901	24.351	NA
CPLX2	Q6PUV4	Complexin-2	sp|Q6PUV4|CPLX2_HUMAN Complexin-2 OS=Homo sapiens OX=9606 GN=CPLX2 PE=2 SV=2	26.2583	26.3826	26.5273	27.2029	26.444	25.3723	26.8854	27.3449
CPLX3	Q8WVH0	Complexin-3	sp|Q8WVH0|CPLX3_HUMAN Complexin-3 OS=Homo sapiens OX=9606 GN=CPLX3 PE=2 SV=1	NA	25.2359	NA	24.7155	NA	NA	NA	NA
CPNE1	Q99829	Copine-1	sp|Q99829|CPNE1_HUMAN Copine-1 OS=Homo sapiens OX=9606 GN=CPNE1 PE=1 SV=1	21.8388	22.6098	21.6856	22.5229	22.6432	23.237	NA	NA
CPNE4	Q96A23	Copine-4	sp|Q96A23|CPNE4_HUMAN Copine-4 OS=Homo sapiens OX=9606 GN=CPNE4 PE=1 SV=1	NA	22.5975	22.5194	22.394	NA	22.6273	22.7877	NA
CPNE5	Q9HCH3	Copine-5	sp|Q9HCH3|CPNE5_HUMAN Copine-5 OS=Homo sapiens OX=9606 GN=CPNE5 PE=1 SV=2	23.802	23.9534	25.0202	25.3165	24.067	24.0434	23.8361	24.1147
CPNE6	O95741	Copine-6	sp|O95741|CPNE6_HUMAN Copine-6 OS=Homo sapiens OX=9606 GN=CPNE6 PE=1 SV=3	25.8768	26.3884	26.2118	26.2032	25.8304	27.1128	27.4113	26.9056
CPOX	P36551	Oxygen-dependent coproporphyrinogen-III oxidase, mitochondrial	sp|P36551|HEM6_HUMAN Oxygen-dependent coproporphyrinogen-III oxidase, mitochondrial OS=Homo sapiens OX=9606 GN=CPOX PE=1 SV=3	22.0252	22.462	NA	22.2769	NA	NA	NA	NA
CPPED1	Q9BRF8	Serine/threonine-protein phosphatase CPPED1	sp|Q9BRF8|CPPED_HUMAN Serine/threonine-protein phosphatase CPPED1 OS=Homo sapiens OX=9606 GN=CPPED1 PE=1 SV=3	NA	NA	NA	21.9171	NA	NA	NA	NA
CPT1A	P50416	Carnitine O-palmitoyltransferase 1, liver isoform	sp|P50416|CPT1A_HUMAN Carnitine O-palmitoyltransferase 1, liver isoform OS=Homo sapiens OX=9606 GN=CPT1A PE=1 SV=2	24.5772	24.6283	24.2821	24.2759	24.9313	23.977	23.3898	23.4529
CPT2	P23786	Carnitine O-palmitoyltransferase 2, mitochondrial	sp|P23786|CPT2_HUMAN Carnitine O-palmitoyltransferase 2, mitochondrial OS=Homo sapiens OX=9606 GN=CPT2 PE=1 SV=2	24.01	24.0565	23.6909	23.7406	24.0168	23.511	22.6177	24.1153
CRABP1	P29762	Cellular retinoic acid-binding protein 1	sp|P29762|RABP1_HUMAN Cellular retinoic acid-binding protein 1 OS=Homo sapiens OX=9606 GN=CRABP1 PE=1 SV=2	NA	23.6612	23.2884	22.2161	NA	24.7452	23.3017	23.6025
CRAT	P43155	Carnitine O-acetyltransferase	sp|P43155|CACP_HUMAN Carnitine O-acetyltransferase OS=Homo sapiens OX=9606 GN=CRAT PE=1 SV=5	25.8419	26.5273	26.2844	26.4742	24.2032	25.0764	24.7024	24.1612
CRBN	Q96SW2	Protein cereblon	sp|Q96SW2|CRBN_HUMAN Protein cereblon OS=Homo sapiens OX=9606 GN=CRBN PE=1 SV=1	24.1601	24.4338	23.7715	24.7503	NA	23.0777	23.717	NA
CRELD1	Q96HD1	Cysteine-rich with EGF-like domain protein 1	sp|Q96HD1|CREL1_HUMAN Cysteine-rich with EGF-like domain protein 1 OS=Homo sapiens OX=9606 GN=CRELD1 PE=1 SV=3	NA	NA	NA	NA	NA	NA	22.433	NA
CRH	P06850	Corticoliberin	sp|P06850|CRF_HUMAN Corticoliberin OS=Homo sapiens OX=9606 GN=CRH PE=1 SV=1	NA	NA	NA	NA	NA	NA	23.1801	NA
CRIP2	P52943	Cysteine-rich protein 2	sp|P52943|CRIP2_HUMAN Cysteine-rich protein 2 OS=Homo sapiens OX=9606 GN=CRIP2 PE=1 SV=1	27.1794	27.4059	26.9707	28.0298	27.5884	28.29	28.6562	27.9141
CRK	P46108	Adapter molecule crk	sp|P46108|CRK_HUMAN Adapter molecule crk OS=Homo sapiens OX=9606 GN=CRK PE=1 SV=2	23.6791	24.213	23.7402	24.4105	24.5203	25.0054	25.5167	24.4167
CRKL	P46109	Crk-like protein	sp|P46109|CRKL_HUMAN Crk-like protein OS=Homo sapiens OX=9606 GN=CRKL PE=1 SV=1	23.7076	23.6375	23.0347	24.5763	25.1339	25.169	25.3789	24.3587
CRMP1	Q14194	Dihydropyrimidinase-related protein 1	sp|Q14194|DPYL1_HUMAN Dihydropyrimidinase-related protein 1 OS=Homo sapiens OX=9606 GN=CRMP1 PE=1 SV=1	28.9938	29.6198	28.9786	29.0987	28.0871	28.9838	29.585	28.8508
CRTAC1	Q9NQ79	Cartilage acidic protein 1	sp|Q9NQ79|CRAC1_HUMAN Cartilage acidic protein 1 OS=Homo sapiens OX=9606 GN=CRTAC1 PE=1 SV=2	NA	NA	24.3108	NA	23.2467	24.6122	25.291	24.8431
CRTC1	Q6UUV9	CREB-regulated transcription coactivator 1	sp|Q6UUV9|CRTC1_HUMAN CREB-regulated transcription coactivator 1 OS=Homo sapiens OX=9606 GN=CRTC1 PE=1 SV=2	23.307	NA	23.0962	23.5207	NA	23.7327	NA	23.7228
CRYAB	P02511	Alpha-crystallin B chain	sp|P02511|CRYAB_HUMAN Alpha-crystallin B chain OS=Homo sapiens OX=9606 GN=CRYAB PE=1 SV=2	29.4579	29.2651	29.0216	30.6418	31.2637	27.5243	28.4075	27.065
CRYL1	Q9Y2S2	Lambda-crystallin homolog	sp|Q9Y2S2|CRYL1_HUMAN Lambda-crystallin homolog OS=Homo sapiens OX=9606 GN=CRYL1 PE=1 SV=3	26.6147	26.4136	26.2703	26.7632	23.9438	24.0311	25.029	NA
CRYM	Q14894	Ketimine reductase mu-crystallin	sp|Q14894|CRYM_HUMAN Ketimine reductase mu-crystallin OS=Homo sapiens OX=9606 GN=CRYM PE=1 SV=1	29.5962	29.5052	29.598	29.2691	26.8014	27.8576	29.0923	26.8124
CRYZ	Q08257	Quinone oxidoreductase	sp|Q08257|QOR_HUMAN Quinone oxidoreductase OS=Homo sapiens OX=9606 GN=CRYZ PE=1 SV=1	26.6583	26.9506	25.9292	26.7447	NA	23.2116	24.0797	24.303
CRYZL1	O95825	Quinone oxidoreductase-like protein 1	sp|O95825|QORL1_HUMAN Quinone oxidoreductase-like protein 1 OS=Homo sapiens OX=9606 GN=CRYZL1 PE=1 SV=2	23.3569	23.6015	23.3529	23.785	NA	NA	NA	NA
CS	O75390	Citrate synthase, mitochondrial	sp|O75390|CISY_HUMAN Citrate synthase, mitochondrial OS=Homo sapiens OX=9606 GN=CS PE=1 SV=2	30.4293	30.602	30.4418	30.4728	30.1271	30.4915	30.3669	29.5829
CSDE1	O75534	Cold shock domain-containing protein E1	sp|O75534|CSDE1_HUMAN Cold shock domain-containing protein E1 OS=Homo sapiens OX=9606 GN=CSDE1 PE=1 SV=2	26.5955	26.8013	26.5748	26.8749	26.8937	26.8591	26.3218	26.8794
CSE1L	P55060	Exportin-2	sp|P55060|XPO2_HUMAN Exportin-2 OS=Homo sapiens OX=9606 GN=CSE1L PE=1 SV=3	27.1597	27.52	27.4154	27.7085	27.5497	27.7968	27.6666	27.007
CSK	P41240	Tyrosine-protein kinase CSK	sp|P41240|CSK_HUMAN Tyrosine-protein kinase CSK OS=Homo sapiens OX=9606 GN=CSK PE=1 SV=1	23.2188	23.2153	23.3853	23.1095	24.4236	24.0988	24.7021	24.1741
CSNK1E	P49674	Casein kinase I isoform epsilon;Casein kinase I isoform delta	sp|P49674|KC1E_HUMAN Casein kinase I isoform epsilon OS=Homo sapiens OX=9606 GN=CSNK1E PE=1 SV=1;sp|P48730|KC1D_HUMAN Casein kinase I isoform delta OS=Homo sapiens OX=9606 GN=CSNK1D PE=1 SV=2	23.702	23.5769	23.3506	23.5567	24.0632	23.9401	24.6562	24.2423
CSNK2A1	P68400	Casein kinase II subunit alpha;Casein kinase II subunit alpha 3	sp|P68400|CSK21_HUMAN Casein kinase II subunit alpha OS=Homo sapiens OX=9606 GN=CSNK2A1 PE=1 SV=1;sp|Q8NEV1|CSK23_HUMAN Casein kinase II subunit alpha 3 OS=Homo sapiens OX=9606 GN=CSNK2A3 PE=1 SV=2	26.2729	26.6857	26.4452	25.9724	25.4681	25.6727	26.3684	26.139
CSNK2A2	P19784	Casein kinase II subunit alpha	sp|P19784|CSK22_HUMAN Casein kinase II subunit alpha OS=Homo sapiens OX=9606 GN=CSNK2A2 PE=1 SV=1	24.378	24.4825	24.2476	24.3337	24.5498	24.381	24.9912	23.9267
CSNK2B	P67870	Casein kinase II subunit beta	sp|P67870|CSK2B_HUMAN Casein kinase II subunit beta OS=Homo sapiens OX=9606 GN=CSNK2B PE=1 SV=1	24.4152	23.7424	24.6233	24.1785	23.1102	23.7598	NA	NA
CSPG5	O95196	Chondroitin sulfate proteoglycan 5	sp|O95196|CSPG5_HUMAN Chondroitin sulfate proteoglycan 5 OS=Homo sapiens OX=9606 GN=CSPG5 PE=1 SV=3	NA	NA	23.3124	23.4793	NA	NA	NA	NA
CSRP1	P21291	Cysteine and glycine-rich protein 1	sp|P21291|CSRP1_HUMAN Cysteine and glycine-rich protein 1 OS=Homo sapiens OX=9606 GN=CSRP1 PE=1 SV=3	23.3504	24.2207	23.9251	25.5462	NA	NA	NA	NA
CST3	P01034	Cystatin-C	sp|P01034|CYTC_HUMAN Cystatin-C OS=Homo sapiens OX=9606 GN=CST3 PE=1 SV=1	25.2802	24.6735	23.7294	25.2893	NA	NA	NA	NA
CSTA	P01040	Cystatin-A;Cystatin-A, N-terminally processed	sp|P01040|CYTA_HUMAN Cystatin-A OS=Homo sapiens OX=9606 GN=CSTA PE=1 SV=1	NA	NA	NA	NA	23.4314	NA	24.7409	NA
CSTF2	P33240	Cleavage stimulation factor subunit 2	sp|P33240|CSTF2_HUMAN Cleavage stimulation factor subunit 2 OS=Homo sapiens OX=9606 GN=CSTF2 PE=1 SV=1	NA	NA	NA	NA	22.9474	NA	23.2509	NA
CTBP1	Q13363	C-terminal-binding protein 1	sp|Q13363|CTBP1_HUMAN C-terminal-binding protein 1 OS=Homo sapiens OX=9606 GN=CTBP1 PE=1 SV=2	26.2331	26.0088	25.6059	25.9742	22.9748	24.5717	23.9912	24.082
CTNNA1	P35221	Catenin alpha-1	sp|P35221|CTNA1_HUMAN Catenin alpha-1 OS=Homo sapiens OX=9606 GN=CTNNA1 PE=1 SV=1	NA	NA	NA	25.4571	24.4061	NA	24.2418	NA
CTNNA2	P26232	Catenin alpha-2	sp|P26232|CTNA2_HUMAN Catenin alpha-2 OS=Homo sapiens OX=9606 GN=CTNNA2 PE=1 SV=5	28.7462	28.7648	28.6733	28.2806	27.4783	29.0618	29.083	28.1847
CTNNB1	P35222	Catenin beta-1	sp|P35222|CTNB1_HUMAN Catenin beta-1 OS=Homo sapiens OX=9606 GN=CTNNB1 PE=1 SV=1	28.0299	27.8439	27.8916	27.8238	27.5086	28.5952	28.7059	28.1189
CTNND1	O60716	Catenin delta-1	sp|O60716|CTND1_HUMAN Catenin delta-1 OS=Homo sapiens OX=9606 GN=CTNND1 PE=1 SV=1	25.3602	25.8356	25.9434	25.0913	26.0261	25.6037	26.2736	24.8633
CTNND2	Q9UQB3	Catenin delta-2	sp|Q9UQB3|CTND2_HUMAN Catenin delta-2 OS=Homo sapiens OX=9606 GN=CTNND2 PE=1 SV=3	26.7768	26.2758	26.7804	26.7259	26.3276	26.8824	26.7528	26.664
CTPS1	P17812	CTP synthase 1	sp|P17812|PYRG1_HUMAN CTP synthase 1 OS=Homo sapiens OX=9606 GN=CTPS1 PE=1 SV=2	22.6158	22.6591	22.1917	22.772	23.9742	NA	23.5922	22.9535
CTSD	P07339	Cathepsin D;Cathepsin D light chain;Cathepsin D heavy chain	sp|P07339|CATD_HUMAN Cathepsin D OS=Homo sapiens OX=9606 GN=CTSD PE=1 SV=1	28.4381	28.7465	28.5822	29.2248	28.2186	27.2911	27.5582	27.4299
CTTN	Q14247	Src substrate cortactin	sp|Q14247|SRC8_HUMAN Src substrate cortactin OS=Homo sapiens OX=9606 GN=CTTN PE=1 SV=2	27.0955	27.1994	27.3588	27.3269	26.8082	26.9829	26.822	26.273
CTTNBP2	Q8WZ74	Cortactin-binding protein 2	sp|Q8WZ74|CTTB2_HUMAN Cortactin-binding protein 2 OS=Homo sapiens OX=9606 GN=CTTNBP2 PE=1 SV=1	22.2908	22.4864	22.7048	NA	NA	NA	22.8988	NA
CUL1	Q13616	Cullin-1	sp|Q13616|CUL1_HUMAN Cullin-1 OS=Homo sapiens OX=9606 GN=CUL1 PE=1 SV=2	25.3072	25.6557	25.5243	25.452	25.0287	25.3899	25.1464	24.6844
CUL2	Q13617	Cullin-2	sp|Q13617|CUL2_HUMAN Cullin-2 OS=Homo sapiens OX=9606 GN=CUL2 PE=1 SV=2	25.8065	25.8044	25.6851	25.7717	25.5	25.9413	26.5075	25.6003
CUL3	Q13618	Cullin-3	sp|Q13618|CUL3_HUMAN Cullin-3 OS=Homo sapiens OX=9606 GN=CUL3 PE=1 SV=2	26.9849	27.0385	27.0332	27.0372	27.1574	27.3033	27.3801	26.658
CUL4A	Q13619	Cullin-4A	sp|Q13619|CUL4A_HUMAN Cullin-4A OS=Homo sapiens OX=9606 GN=CUL4A PE=1 SV=3	NA	22.2167	22.1932	NA	NA	22.0762	NA	NA
CUL4B	Q13620	Cullin-4B	sp|Q13620|CUL4B_HUMAN Cullin-4B OS=Homo sapiens OX=9606 GN=CUL4B PE=1 SV=4	24.4401	24.2648	24.1631	24.6127	NA	23.7686	23.4881	NA
CUL5	Q93034	Cullin-5	sp|Q93034|CUL5_HUMAN Cullin-5 OS=Homo sapiens OX=9606 GN=CUL5 PE=1 SV=4	26.0109	26.2598	26.3415	26.1758	25.8704	25.7958	26.7987	25.7525
CUTA	O60888	Protein CutA	sp|O60888|CUTA_HUMAN Protein CutA OS=Homo sapiens OX=9606 GN=CUTA PE=1 SV=2	24.2378	24.7055	24.2656	24.9913	NA	NA	24.1926	NA
CXADR	P78310	Coxsackievirus and adenovirus receptor	sp|P78310|CXAR_HUMAN Coxsackievirus and adenovirus receptor OS=Homo sapiens OX=9606 GN=CXADR PE=1 SV=1	23.3631	23.9615	23.7815	23.146	23.8358	24.8176	24.871	NA
CYB5B	O43169	Cytochrome b5 type B	sp|O43169|CYB5B_HUMAN Cytochrome b5 type B OS=Homo sapiens OX=9606 GN=CYB5B PE=1 SV=3	24.5555	24.7369	24.9468	25.8976	24.6476	24.6157	24.1611	24.9797
CYB5R1	Q9UHQ9	NADH-cytochrome b5 reductase 1	sp|Q9UHQ9|NB5R1_HUMAN NADH-cytochrome b5 reductase 1 OS=Homo sapiens OX=9606 GN=CYB5R1 PE=1 SV=1	25.3168	25.5315	25.8705	25.6955	24.1015	25.0835	25.2765	25.7138
CYB5R2	Q6BCY4	NADH-cytochrome b5 reductase 2	sp|Q6BCY4|NB5R2_HUMAN NADH-cytochrome b5 reductase 2 OS=Homo sapiens OX=9606 GN=CYB5R2 PE=1 SV=1	23.1369	23.9468	24.1376	24.6187	NA	NA	23.4556	NA
CYB5R3	P00387	NADH-cytochrome b5 reductase 3;NADH-cytochrome b5 reductase 3 membrane-bound form;NADH-cytochrome b5 reductase 3 soluble form	sp|P00387|NB5R3_HUMAN NADH-cytochrome b5 reductase 3 OS=Homo sapiens OX=9606 GN=CYB5R3 PE=1 SV=3	26.8976	26.8035	27.0736	27.3999	27.3081	26.764	26.3183	26.7653
CYBRD1	Q53TN4	Cytochrome b reductase 1	sp|Q53TN4|CYBR1_HUMAN Cytochrome b reductase 1 OS=Homo sapiens OX=9606 GN=CYBRD1 PE=1 SV=1	23.0315	NA	22.8265	23.5578	NA	NA	NA	NA
CYC1	P08574	Cytochrome c1, heme protein, mitochondrial	sp|P08574|CY1_HUMAN Cytochrome c1, heme protein, mitochondrial OS=Homo sapiens OX=9606 GN=CYC1 PE=1 SV=3	26.712	27.2103	27.0084	26.9751	26.6625	26.6574	26.8971	26.3424
CYCS	P99999	Cytochrome c	sp|P99999|CYC_HUMAN Cytochrome c OS=Homo sapiens OX=9606 GN=CYCS PE=1 SV=2	24.7147	25.5581	24.9793	25.5333	23.5047	23.226	22.0221	23.4677
CYFIP1	Q7L576	Cytoplasmic FMR1-interacting protein 1	sp|Q7L576|CYFP1_HUMAN Cytoplasmic FMR1-interacting protein 1 OS=Homo sapiens OX=9606 GN=CYFIP1 PE=1 SV=1	24.5638	24.7142	24.6153	24.5105	25.0176	24.8864	25.796	24.8307
CYFIP2	Q96F07	Cytoplasmic FMR1-interacting protein 2	sp|Q96F07|CYFP2_HUMAN Cytoplasmic FMR1-interacting protein 2 OS=Homo sapiens OX=9606 GN=CYFIP2 PE=1 SV=2	28.1648	28.2216	28.5162	27.9832	26.7742	28.3417	28.1653	26.8347
CYLD	Q9NQC7	Ubiquitin carboxyl-terminal hydrolase CYLD	sp|Q9NQC7|CYLD_HUMAN Ubiquitin carboxyl-terminal hydrolase CYLD OS=Homo sapiens OX=9606 GN=CYLD PE=1 SV=1	23.4847	23.7199	23.7451	23.6974	24.3395	24.8244	24.6149	24.6746
CYP46A1	Q9Y6A2	Cholesterol 24-hydroxylase	sp|Q9Y6A2|CP46A_HUMAN Cholesterol 24-hydroxylase OS=Homo sapiens OX=9606 GN=CYP46A1 PE=1 SV=1	23.4611	24.0638	23.8536	24.0644	NA	23.8229	23.3042	24.3691
CYTH2	Q99418	Cytohesin-2	sp|Q99418|CYH2_HUMAN Cytohesin-2 OS=Homo sapiens OX=9606 GN=CYTH2 PE=1 SV=2	NA	NA	NA	NA	NA	20.6908	NA	NA
CYTH3	O43739	Cytohesin-3	sp|O43739|CYH3_HUMAN Cytohesin-3 OS=Homo sapiens OX=9606 GN=CYTH3 PE=1 SV=2	NA	23.2306	23.3892	23.2257	NA	23.5784	23.6745	NA
D2HGDH	Q8N465	D-2-hydroxyglutarate dehydrogenase, mitochondrial	sp|Q8N465|D2HDH_HUMAN D-2-hydroxyglutarate dehydrogenase, mitochondrial OS=Homo sapiens OX=9606 GN=D2HGDH PE=1 SV=3	NA	NA	23.3067	23.2588	NA	NA	NA	NA
DAAM1	Q9Y4D1	Disheveled-associated activator of morphogenesis 1	sp|Q9Y4D1|DAAM1_HUMAN Disheveled-associated activator of morphogenesis 1 OS=Homo sapiens OX=9606 GN=DAAM1 PE=1 SV=2	23.6538	23.9196	23.597	23.2268	24.0144	23.4827	NA	24.171
DAAM2	Q86T65	Disheveled-associated activator of morphogenesis 2	sp|Q86T65|DAAM2_HUMAN Disheveled-associated activator of morphogenesis 2 OS=Homo sapiens OX=9606 GN=DAAM2 PE=1 SV=3	23.2322	24.0973	23.951	23.9958	NA	NA	22.0724	NA
DAB2IP	Q5VWQ8	Disabled homolog 2-interacting protein	sp|Q5VWQ8|DAB2P_HUMAN Disabled homolog 2-interacting protein OS=Homo sapiens OX=9606 GN=DAB2IP PE=1 SV=2	23.6669	23.7646	23.5212	23.2235	24.0901	24.4446	24.8175	24.4746
DAGLA	Q9Y4D2	Sn1-specific diacylglycerol lipase alpha	sp|Q9Y4D2|DGLA_HUMAN Sn1-specific diacylglycerol lipase alpha OS=Homo sapiens OX=9606 GN=DAGLA PE=1 SV=3	NA	NA	22.5578	22.0112	NA	22.1495	NA	NA
DAGLB	Q8NCG7	Sn1-specific diacylglycerol lipase beta	sp|Q8NCG7|DGLB_HUMAN Sn1-specific diacylglycerol lipase beta OS=Homo sapiens OX=9606 GN=DAGLB PE=1 SV=2	NA	NA	NA	NA	NA	NA	24.9634	NA
DAK	Q3LXA3	Bifunctional ATP-dependent dihydroxyacetone kinase/FAD-AMP lyase (cyclizing);ATP-dependent dihydroxyacetone kinase;FAD-AMP lyase (cyclizing)	sp|Q3LXA3|TKFC_HUMAN Triokinase/FMN cyclase OS=Homo sapiens OX=9606 GN=TKFC PE=1 SV=2	23.6988	24.8489	24.1103	24.8048	22.6642	23.4013	23.3131	22.4651
DAPK3	O43293	Death-associated protein kinase 3	sp|O43293|DAPK3_HUMAN Death-associated protein kinase 3 OS=Homo sapiens OX=9606 GN=DAPK3 PE=1 SV=1	22.5084	NA	22.8	NA	23.1249	NA	NA	NA
DARS	P14868	Aspartate--tRNA ligase, cytoplasmic	sp|P14868|SYDC_HUMAN Aspartate--tRNA ligase, cytoplasmic OS=Homo sapiens OX=9606 GN=DARS PE=1 SV=2	26.8574	27.2995	27.024	27.5985	26.4347	26.6937	27.1858	26.1358
DARS2	Q6PI48	Aspartate--tRNA ligase, mitochondrial	sp|Q6PI48|SYDM_HUMAN Aspartate--tRNA ligase, mitochondrial OS=Homo sapiens OX=9606 GN=DARS2 PE=1 SV=1	NA	22.6705	23.0497	22.6845	22.2508	22.1973	22.2045	NA
DAZAP1	Q96EP5	DAZ-associated protein 1	sp|Q96EP5|DAZP1_HUMAN DAZ-associated protein 1 OS=Homo sapiens OX=9606 GN=DAZAP1 PE=1 SV=1	NA	22.3876	22.4643	NA	NA	NA	NA	NA
DBI	P07108	Acyl-CoA-binding protein	sp|P07108|ACBP_HUMAN Acyl-CoA-binding protein OS=Homo sapiens OX=9606 GN=DBI PE=1 SV=2	25.0265	24.6108	24.5309	25.6534	NA	NA	NA	NA
DBN1	Q16643	Drebrin	sp|Q16643|DREB_HUMAN Drebrin OS=Homo sapiens OX=9606 GN=DBN1 PE=1 SV=4	27.9118	27.862	27.959	27.4915	26.6521	27.8041	27.0792	26.4509
DBNL	Q9UJU6	Drebrin-like protein	sp|Q9UJU6|DBNL_HUMAN Drebrin-like protein OS=Homo sapiens OX=9606 GN=DBNL PE=1 SV=1	26.8053	26.7141	26.7987	26.7308	26.3397	27.3437	27.3629	25.9388
DBT	P11182	Lipoamide acyltransferase component of branched-chain alpha-keto acid dehydrogenase complex, mitochondrial	sp|P11182|ODB2_HUMAN Lipoamide acyltransferase component of branched-chain alpha-keto acid dehydrogenase complex, mitochondrial OS=Homo sapiens OX=9606 GN=DBT PE=1 SV=3	26.1698	26.1942	26.6255	26.1898	25.4938	26.3382	26.1864	25.461
DCAKD	Q8WVC6	Dephospho-CoA kinase domain-containing protein	sp|Q8WVC6|DCAKD_HUMAN Dephospho-CoA kinase domain-containing protein OS=Homo sapiens OX=9606 GN=DCAKD PE=1 SV=1	NA	NA	NA	22.8566	NA	NA	NA	NA
DCLK1	O15075	Serine/threonine-protein kinase DCLK1	sp|O15075|DCLK1_HUMAN Serine/threonine-protein kinase DCLK1 OS=Homo sapiens OX=9606 GN=DCLK1 PE=1 SV=2	28.5679	28.8792	29.0433	28.559	29.1752	29.6521	29.9568	29.2967
DCLK2	Q8N568	Serine/threonine-protein kinase DCLK2	sp|Q8N568|DCLK2_HUMAN Serine/threonine-protein kinase DCLK2 OS=Homo sapiens OX=9606 GN=DCLK2 PE=1 SV=4	25.7252	25.7281	25.7491	25.6089	26.1875	26.4108	26.7733	26.8224
DCN	P07585	Decorin	sp|P07585|PGS2_HUMAN Decorin OS=Homo sapiens OX=9606 GN=DCN PE=1 SV=1	NA	NA	NA	NA	23.6007	NA	NA	NA
DCTN1	Q14203	Dynactin subunit 1	sp|Q14203|DCTN1_HUMAN Dynactin subunit 1 OS=Homo sapiens OX=9606 GN=DCTN1 PE=1 SV=3	28.6722	28.7943	28.8774	29.0612	27.7909	28.8433	28.7775	28.2576
DCTN2	Q13561	Dynactin subunit 2	sp|Q13561|DCTN2_HUMAN Dynactin subunit 2 OS=Homo sapiens OX=9606 GN=DCTN2 PE=1 SV=4	28.4701	28.7123	28.9547	28.9915	26.6913	27.8497	28.5823	27.9532
DCTN3	O75935	Dynactin subunit 3	sp|O75935|DCTN3_HUMAN Dynactin subunit 3 OS=Homo sapiens OX=9606 GN=DCTN3 PE=1 SV=1	26.7387	26.2692	26.4059	26.3399	24.2164	25.4932	26.3767	25.2074
DCTN4	Q9UJW0	Dynactin subunit 4	sp|Q9UJW0|DCTN4_HUMAN Dynactin subunit 4 OS=Homo sapiens OX=9606 GN=DCTN4 PE=1 SV=1	26.4314	26.6632	26.73	26.8618	24.7873	26.0894	26.4061	25.4571
DCTN5	Q9BTE1	Dynactin subunit 5	sp|Q9BTE1|DCTN5_HUMAN Dynactin subunit 5 OS=Homo sapiens OX=9606 GN=DCTN5 PE=1 SV=1	NA	23.567	24.119	24.3604	NA	23.0648	23.0035	NA
DCUN1D1	Q96GG9	DCN1-like protein 1	sp|Q96GG9|DCNL1_HUMAN DCN1-like protein 1 OS=Homo sapiens OX=9606 GN=DCUN1D1 PE=1 SV=1	23.0216	23.8377	23.8606	23.9764	NA	22.8553	23.1706	NA
DCX	O43602	Neuronal migration protein doublecortin	sp|O43602|DCX_HUMAN Neuronal migration protein doublecortin OS=Homo sapiens OX=9606 GN=DCX PE=1 SV=4	NA	NA	NA	NA	NA	23.0929	24.365	23.9488
DCXR	Q7Z4W1	L-xylulose reductase	sp|Q7Z4W1|DCXR_HUMAN L-xylulose reductase OS=Homo sapiens OX=9606 GN=DCXR PE=1 SV=2	NA	24.6161	24.0743	24.2738	23.6478	NA	23.6651	NA
DDAH1	O94760	N(G),N(G)-dimethylarginine dimethylaminohydrolase 1	sp|O94760|DDAH1_HUMAN N(G),N(G)-dimethylarginine dimethylaminohydrolase 1 OS=Homo sapiens OX=9606 GN=DDAH1 PE=1 SV=3	28.0596	27.7514	27.4853	27.7975	26.8013	27.0255	27.0669	26.4262
DDAH2	O95865	N(G),N(G)-dimethylarginine dimethylaminohydrolase 2	sp|O95865|DDAH2_HUMAN N(G),N(G)-dimethylarginine dimethylaminohydrolase 2 OS=Homo sapiens OX=9606 GN=DDAH2 PE=1 SV=1	24.8422	25.4093	24.7241	25.9031	25.2423	24.3357	24.9209	24.4596
DDB1	Q16531	DNA damage-binding protein 1	sp|Q16531|DDB1_HUMAN DNA damage-binding protein 1 OS=Homo sapiens OX=9606 GN=DDB1 PE=1 SV=1	27.1358	27.4126	27.5787	27.3099	22.9611	24.7145	25.5337	24.0796
DDHD2	O94830	Phospholipase DDHD2	sp|O94830|DDHD2_HUMAN Phospholipase DDHD2 OS=Homo sapiens OX=9606 GN=DDHD2 PE=1 SV=2	NA	22.6568	22.3695	22.5091	NA	22.5469	22.4128	NA
DDI2	Q5TDH0	Protein DDI1 homolog 2	sp|Q5TDH0|DDI2_HUMAN Protein DDI1 homolog 2 OS=Homo sapiens OX=9606 GN=DDI2 PE=1 SV=1	23.412	23.3733	23.6212	23.3251	NA	23.4482	22.7429	NA
DDOST	P39656	Dolichyl-diphosphooligosaccharide--protein glycosyltransferase 48 kDa subunit	sp|P39656|OST48_HUMAN Dolichyl-diphosphooligosaccharide--protein glycosyltransferase 48 kDa subunit OS=Homo sapiens OX=9606 GN=DDOST PE=1 SV=4	24.3679	24.8165	24.8817	24.8466	25.8997	25.1364	24.8324	24.3837
DDRGK1	Q96HY6	DDRGK domain-containing protein 1	sp|Q96HY6|DDRGK_HUMAN DDRGK domain-containing protein 1 OS=Homo sapiens OX=9606 GN=DDRGK1 PE=1 SV=2	NA	NA	NA	NA	NA	21.6623	21.7255	NA
DDX1	Q92499	ATP-dependent RNA helicase DDX1	sp|Q92499|DDX1_HUMAN ATP-dependent RNA helicase DDX1 OS=Homo sapiens OX=9606 GN=DDX1 PE=1 SV=2	25.9334	26.2621	26.0802	26.5212	26.1789	26.3218	25.5618	25.7747
DDX17	Q92841	Probable ATP-dependent RNA helicase DDX17	sp|Q92841|DDX17_HUMAN Probable ATP-dependent RNA helicase DDX17 OS=Homo sapiens OX=9606 GN=DDX17 PE=1 SV=2	25.0755	25.1573	25.019	25.542	26.6147	26.6422	26.6947	25.5738
DDX19A	Q9NUU7	ATP-dependent RNA helicase DDX19A;ATP-dependent RNA helicase DDX19B	sp|Q9NUU7|DD19A_HUMAN ATP-dependent RNA helicase DDX19A OS=Homo sapiens OX=9606 GN=DDX19A PE=1 SV=1;sp|Q9UMR2|DD19B_HUMAN ATP-dependent RNA helicase DDX19B OS=Homo sapiens OX=9606 GN=DDX19B PE=1 SV=1	25.216	25.3783	25.2105	25.0273	26.0967	25.6236	25.314	25.7152
DDX39B	Q13838	Spliceosome RNA helicase DDX39B	sp|Q13838|DX39B_HUMAN Spliceosome RNA helicase DDX39B OS=Homo sapiens OX=9606 GN=DDX39B PE=1 SV=1	24.2656	24.8668	24.9539	24.96	24.7762	24.7346	24.4846	24.2554
DDX3X	O00571	ATP-dependent RNA helicase DDX3X	sp|O00571|DDX3X_HUMAN ATP-dependent RNA helicase DDX3X OS=Homo sapiens OX=9606 GN=DDX3X PE=1 SV=3	24.6998	24.876	24.4533	25.3071	26.1986	24.7776	25.656	25.4496
DDX46	Q7L014	Probable ATP-dependent RNA helicase DDX46	sp|Q7L014|DDX46_HUMAN Probable ATP-dependent RNA helicase DDX46 OS=Homo sapiens OX=9606 GN=DDX46 PE=1 SV=2	NA	22.0984	NA	22.4632	23.6671	23.2754	22.9645	23.6703
DDX5	P17844	Probable ATP-dependent RNA helicase DDX5	sp|P17844|DDX5_HUMAN Probable ATP-dependent RNA helicase DDX5 OS=Homo sapiens OX=9606 GN=DDX5 PE=1 SV=1	24.8042	25.0627	25.2752	25.0006	25.9366	25.2601	25.0402	26.1591
DDX6	P26196	Probable ATP-dependent RNA helicase DDX6	sp|P26196|DDX6_HUMAN Probable ATP-dependent RNA helicase DDX6 OS=Homo sapiens OX=9606 GN=DDX6 PE=1 SV=2	25.2062	25.7413	25.6597	25.3397	24.6745	24.6146	25.636	24.4911
DECR1	Q16698	2,4-dienoyl-CoA reductase, mitochondrial	sp|Q16698|DECR_HUMAN 2,4-dienoyl-CoA reductase, mitochondrial OS=Homo sapiens OX=9606 GN=DECR1 PE=1 SV=1	25.6689	25.9168	25.8956	26.5036	24.031	23.6211	24.2661	22.3716
DEK	P35659	Protein DEK	sp|P35659|DEK_HUMAN Protein DEK OS=Homo sapiens OX=9606 GN=DEK PE=1 SV=1	NA	NA	NA	22.4633	24.4053	24.1437	23.3754	23.356
DENND1A	Q8TEH3	DENN domain-containing protein 1A	sp|Q8TEH3|DEN1A_HUMAN DENN domain-containing protein 1A OS=Homo sapiens OX=9606 GN=DENND1A PE=1 SV=2	NA	21.7112	NA	NA	NA	NA	NA	NA
DENND4B	O75064	DENN domain-containing protein 4B	sp|O75064|DEN4B_HUMAN DENN domain-containing protein 4B OS=Homo sapiens OX=9606 GN=DENND4B PE=1 SV=4	NA	NA	NA	21.9895	NA	NA	NA	NA
DENR	O43583	Density-regulated protein	sp|O43583|DENR_HUMAN Density-regulated protein OS=Homo sapiens OX=9606 GN=DENR PE=1 SV=2	24.0897	23.4148	22.8371	24.6894	NA	22.7444	NA	NA
DES	P17661	Desmin	sp|P17661|DESM_HUMAN Desmin OS=Homo sapiens OX=9606 GN=DES PE=1 SV=3	23.3715	23.7167	23.4946	23.5118	22.8774	NA	24.3065	NA
DFFA	O00273	DNA fragmentation factor subunit alpha	sp|O00273|DFFA_HUMAN DNA fragmentation factor subunit alpha OS=Homo sapiens OX=9606 GN=DFFA PE=1 SV=1	NA	NA	NA	NA	NA	22.7123	NA	NA
DFNA5	O60443	Non-syndromic hearing impairment protein 5	sp|O60443|GSDME_HUMAN Gasdermin-E OS=Homo sapiens OX=9606 GN=GSDME PE=1 SV=2	NA	NA	NA	23.6403	NA	NA	NA	NA
DGKA	P23743	Diacylglycerol kinase alpha	sp|P23743|DGKA_HUMAN Diacylglycerol kinase alpha OS=Homo sapiens OX=9606 GN=DGKA PE=1 SV=3	NA	23.7359	23.5605	23.601	24.5081	24.3533	25.2665	25.1084
DGKB	Q9Y6T7	Diacylglycerol kinase beta	sp|Q9Y6T7|DGKB_HUMAN Diacylglycerol kinase beta OS=Homo sapiens OX=9606 GN=DGKB PE=2 SV=2	24.7321	24.9468	24.642	24.7608	23.6899	25.1421	24.9115	25.7465
DGKE	P52429	Diacylglycerol kinase epsilon	sp|P52429|DGKE_HUMAN Diacylglycerol kinase epsilon OS=Homo sapiens OX=9606 GN=DGKE PE=1 SV=1	NA	NA	NA	NA	NA	23.1282	NA	NA
DGKG	P49619	Diacylglycerol kinase gamma	sp|P49619|DGKG_HUMAN Diacylglycerol kinase gamma OS=Homo sapiens OX=9606 GN=DGKG PE=2 SV=3	23.943	23.8598	NA	NA	NA	NA	NA	NA
DGKI	O75912	Diacylglycerol kinase iota	sp|O75912|DGKI_HUMAN Diacylglycerol kinase iota OS=Homo sapiens OX=9606 GN=DGKI PE=1 SV=1	NA	NA	NA	22.448	NA	22.8119	NA	NA
DGKQ	P52824	Diacylglycerol kinase theta	sp|P52824|DGKQ_HUMAN Diacylglycerol kinase theta OS=Homo sapiens OX=9606 GN=DGKQ PE=1 SV=2	23.2091	NA	22.583	NA	NA	NA	NA	NA
DGKZ	Q13574	Diacylglycerol kinase zeta	sp|Q13574|DGKZ_HUMAN Diacylglycerol kinase zeta OS=Homo sapiens OX=9606 GN=DGKZ PE=1 SV=3	NA	23.6249	23.4276	23.2571	NA	23.2999	24.4464	23.7886
DGUOK	Q16854	Deoxyguanosine kinase, mitochondrial	sp|Q16854|DGUOK_HUMAN Deoxyguanosine kinase, mitochondrial OS=Homo sapiens OX=9606 GN=DGUOK PE=1 SV=2	22.7872	23.4353	23.5525	NA	NA	23.4599	NA	NA
DHRS4	Q9BTZ2	Dehydrogenase/reductase SDR family member 4;Dehydrogenase/reductase SDR family member 4-like 2	sp|Q9BTZ2|DHRS4_HUMAN Dehydrogenase/reductase SDR family member 4 OS=Homo sapiens OX=9606 GN=DHRS4 PE=1 SV=3;sp|Q6PKH6|DR4L2_HUMAN Dehydrogenase/reductase SDR family member 4-like 2 OS=Homo sapiens OX=9606 GN=DHRS4L2 PE=2 SV=1	NA	22.18	22.5218	22.5998	NA	22.5645	NA	23.1398
DHRS7	Q9Y394	Dehydrogenase/reductase SDR family member 7	sp|Q9Y394|DHRS7_HUMAN Dehydrogenase/reductase SDR family member 7 OS=Homo sapiens OX=9606 GN=DHRS7 PE=1 SV=1	23.8007	23.5366	23.8887	23.9324	24.125	23.8894	23.6639	23.1553
DHX15	O43143	Pre-mRNA-splicing factor ATP-dependent RNA helicase DHX15	sp|O43143|DHX15_HUMAN Pre-mRNA-splicing factor ATP-dependent RNA helicase DHX15 OS=Homo sapiens OX=9606 GN=DHX15 PE=1 SV=2	23.3677	23.3087	23.6044	23.9558	NA	23.4357	23.9999	23.7445
DHX30	Q7L2E3	Putative ATP-dependent RNA helicase DHX30	sp|Q7L2E3|DHX30_HUMAN ATP-dependent RNA helicase DHX30 OS=Homo sapiens OX=9606 GN=DHX30 PE=1 SV=1	24.4284	24.8294	24.6667	24.4794	24.6742	24.7753	25.4942	25.5414
DHX9	Q08211	ATP-dependent RNA helicase A	sp|Q08211|DHX9_HUMAN ATP-dependent RNA helicase A OS=Homo sapiens OX=9606 GN=DHX9 PE=1 SV=4	26.3961	26.5683	26.7075	26.9506	27.1232	27.2149	26.8224	27.3169
DIABLO	Q9NR28	Diablo homolog, mitochondrial	sp|Q9NR28|DBLOH_HUMAN Diablo homolog, mitochondrial OS=Homo sapiens OX=9606 GN=DIABLO PE=1 SV=1	23.9069	24.2986	24.4841	24.4721	24.2826	NA	NA	22.6998
DIAPH1	O60610	Protein diaphanous homolog 1	sp|O60610|DIAP1_HUMAN Protein diaphanous homolog 1 OS=Homo sapiens OX=9606 GN=DIAPH1 PE=1 SV=2	25.705	25.6917	NA	25.9219	NA	26.0538	26.002	26.041
DIP2B	Q9P265	Disco-interacting protein 2 homolog B	sp|Q9P265|DIP2B_HUMAN Disco-interacting protein 2 homolog B OS=Homo sapiens OX=9606 GN=DIP2B PE=1 SV=3	24.4639	25.1335	24.8003	24.9921	24.3663	24.81	25.3119	24.0519
DIP2C	Q9Y2E4	Disco-interacting protein 2 homolog C	sp|Q9Y2E4|DIP2C_HUMAN Disco-interacting protein 2 homolog C OS=Homo sapiens OX=9606 GN=DIP2C PE=1 SV=2	22.725	23.1526	22.7531	22.9519	NA	23.48	23.2165	NA
DIRAS1	O95057	GTP-binding protein Di-Ras1	sp|O95057|DIRA1_HUMAN GTP-binding protein Di-Ras1 OS=Homo sapiens OX=9606 GN=DIRAS1 PE=1 SV=1	25.876	25.6086	25.6053	25.6678	25.6371	25.8963	25.9535	25.1691
DIRAS2	Q96HU8	GTP-binding protein Di-Ras2	sp|Q96HU8|DIRA2_HUMAN GTP-binding protein Di-Ras2 OS=Homo sapiens OX=9606 GN=DIRAS2 PE=1 SV=1	25.8205	25.9819	25.8931	26.1324	26.1873	27.0219	27.4887	25.762
DKK3	Q9UBP4	Dickkopf-related protein 3	sp|Q9UBP4|DKK3_HUMAN Dickkopf-related protein 3 OS=Homo sapiens OX=9606 GN=DKK3 PE=1 SV=2	23.7239	22.9848	22.9558	23.4665	NA	23.6404	22.6399	NA
DLAT	P10515	Dihydrolipoyllysine-residue acetyltransferase component of pyruvate dehydrogenase complex, mitochondrial	sp|P10515|ODP2_HUMAN Dihydrolipoyllysine-residue acetyltransferase component of pyruvate dehydrogenase complex, mitochondrial OS=Homo sapiens OX=9606 GN=DLAT PE=1 SV=3	29.2525	29.2372	29.3853	29.258	28.0072	28.4916	29.5066	28.7205
DLD	P09622	Dihydrolipoyl dehydrogenase, mitochondrial	sp|P09622|DLDH_HUMAN Dihydrolipoyl dehydrogenase, mitochondrial OS=Homo sapiens OX=9606 GN=DLD PE=1 SV=2	28.4619	28.5578	28.3726	28.1978	26.7532	27.4109	28.1161	26.529
DLG1	Q12959	Disks large homolog 1	sp|Q12959|DLG1_HUMAN Disks large homolog 1 OS=Homo sapiens OX=9606 GN=DLG1 PE=1 SV=2	25.5433	25.6777	25.9215	25.5406	25.3131	26.058	26.0158	24.955
DLG2	Q15700	Disks large homolog 2	sp|Q15700|DLG2_HUMAN Disks large homolog 2 OS=Homo sapiens OX=9606 GN=DLG2 PE=1 SV=3	26.4437	26.1355	26.3117	25.8731	25.4544	27.3301	26.4245	26.4011
DLG3	Q92796	Disks large homolog 3	sp|Q92796|DLG3_HUMAN Disks large homolog 3 OS=Homo sapiens OX=9606 GN=DLG3 PE=1 SV=2	24.84	25.1828	25.3168	24.8344	25.2834	25.6654	25.8924	25.2946
DLG4	P78352	Disks large homolog 4	sp|P78352|DLG4_HUMAN Disks large homolog 4 OS=Homo sapiens OX=9606 GN=DLG4 PE=1 SV=3	28.6205	28.6997	28.8863	28.5683	28.0164	29.3672	29.3208	28.573
DLGAP1	O14490	Disks large-associated protein 1	sp|O14490|DLGP1_HUMAN Disks large-associated protein 1 OS=Homo sapiens OX=9606 GN=DLGAP1 PE=1 SV=1	26.4205	26.4665	26.3611	25.8203	25.9797	26.8847	26.3817	27.3529
DLGAP2	Q9P1A6	Disks large-associated protein 2	sp|Q9P1A6|DLGP2_HUMAN Disks large-associated protein 2 OS=Homo sapiens OX=9606 GN=DLGAP2 PE=1 SV=4	23.4065	23.8065	23.4686	23.3027	NA	24.5422	24.4478	NA
DLGAP3	O95886	Disks large-associated protein 3	sp|O95886|DLGP3_HUMAN Disks large-associated protein 3 OS=Homo sapiens OX=9606 GN=DLGAP3 PE=1 SV=3	25.1579	25.3301	24.7664	25.1383	24.8532	26.6244	26.0015	25.8124
DLGAP4	Q9Y2H0	Disks large-associated protein 4	sp|Q9Y2H0|DLGP4_HUMAN Disks large-associated protein 4 OS=Homo sapiens OX=9606 GN=DLGAP4 PE=1 SV=3	23.575	23.4408	23.54	23.4563	NA	24.0979	23.738	23.086
DLST	P36957	Dihydrolipoyllysine-residue succinyltransferase component of 2-oxoglutarate dehydrogenase complex, mitochondrial	sp|P36957|ODO2_HUMAN Dihydrolipoyllysine-residue succinyltransferase component of 2-oxoglutarate dehydrogenase complex, mitochondrial OS=Homo sapiens OX=9606 GN=DLST PE=1 SV=4	28.2642	28.5434	28.5903	28.838	26.1355	26.0596	27.7523	27.6325
DMD	P11532	Dystrophin	sp|P11532|DMD_HUMAN Dystrophin OS=Homo sapiens OX=9606 GN=DMD PE=1 SV=3	23.8465	23.4777	23.907	23.8651	24.0237	22.6056	NA	23.2659
DMTN	Q08495	Dematin	sp|Q08495|DEMA_HUMAN Dematin OS=Homo sapiens OX=9606 GN=DMTN PE=1 SV=3	26.5339	26.4965	26.4286	26.6428	25.9696	27.1678	27.2667	27.3388
DMWD	Q09019	Dystrophia myotonica WD repeat-containing protein	sp|Q09019|DMWD_HUMAN Dystrophia myotonica WD repeat-containing protein OS=Homo sapiens OX=9606 GN=DMWD PE=1 SV=3	24.5587	24.0714	24.3122	23.9741	23.892	24.7721	24.6568	25.4828
DMXL2	Q8TDJ6	DmX-like protein 2	sp|Q8TDJ6|DMXL2_HUMAN DmX-like protein 2 OS=Homo sapiens OX=9606 GN=DMXL2 PE=1 SV=2	28.4995	28.5723	28.7996	28.5964	27.7892	28.7516	28.8243	27.38
DNA2	P51530	DNA replication ATP-dependent helicase/nuclease DNA2;DNA replication nuclease DNA2;DNA replication ATP-dependent helicase DNA2	sp|P51530|DNA2_HUMAN DNA replication ATP-dependent helicase/nuclease DNA2 OS=Homo sapiens OX=9606 GN=DNA2 PE=1 SV=3	25.3509	NA	25.3793	NA	NA	NA	NA	NA
DNAJA1	P31689	DnaJ homolog subfamily A member 1	sp|P31689|DNJA1_HUMAN DnaJ homolog subfamily A member 1 OS=Homo sapiens OX=9606 GN=DNAJA1 PE=1 SV=2	25.3513	25.2028	25.4025	26.1489	25.8857	25.3862	26.3062	25.7504
DNAJA2	O60884	DnaJ homolog subfamily A member 2	sp|O60884|DNJA2_HUMAN DnaJ homolog subfamily A member 2 OS=Homo sapiens OX=9606 GN=DNAJA2 PE=1 SV=1	25.4429	25.8994	26.0261	26.0172	25.3618	25.2368	25.4612	25.2077
DNAJA3	Q96EY1	DnaJ homolog subfamily A member 3, mitochondrial	sp|Q96EY1|DNJA3_HUMAN DnaJ homolog subfamily A member 3, mitochondrial OS=Homo sapiens OX=9606 GN=DNAJA3 PE=1 SV=2	24.4432	24.5336	24.7782	24.4366	24.5757	23.8674	24.9767	24.655
DNAJA4	Q8WW22	DnaJ homolog subfamily A member 4	sp|Q8WW22|DNJA4_HUMAN DnaJ homolog subfamily A member 4 OS=Homo sapiens OX=9606 GN=DNAJA4 PE=1 SV=1	23.6676	23.403	23.9404	24.0941	24.43	22.8456	NA	23.0951
DNAJB1	P25685	DnaJ homolog subfamily B member 1	sp|P25685|DNJB1_HUMAN DnaJ homolog subfamily B member 1 OS=Homo sapiens OX=9606 GN=DNAJB1 PE=1 SV=4	25.5059	25.2667	25.4332	24.6891	26.8306	25.8888	26.8615	26.3012
DNAJB11	Q9UBS4	DnaJ homolog subfamily B member 11	sp|Q9UBS4|DJB11_HUMAN DnaJ homolog subfamily B member 11 OS=Homo sapiens OX=9606 GN=DNAJB11 PE=1 SV=1	23.9624	23.8885	24.2557	23.9934	25.0038	23.0421	23.7112	24.4076
DNAJB2	P25686	DnaJ homolog subfamily B member 2	sp|P25686|DNJB2_HUMAN DnaJ homolog subfamily B member 2 OS=Homo sapiens OX=9606 GN=DNAJB2 PE=1 SV=3	26.4287	26.0664	25.7631	25.9212	26.9152	26.3738	26.2104	27.4983
DNAJB4	Q9UDY4	DnaJ homolog subfamily B member 4	sp|Q9UDY4|DNJB4_HUMAN DnaJ homolog subfamily B member 4 OS=Homo sapiens OX=9606 GN=DNAJB4 PE=1 SV=1	26.1351	26.2867	26.1668	26.1039	26.645	26.3975	26.5495	26.0958
DNAJB6	O75190	DnaJ homolog subfamily B member 6;DnaJ homolog subfamily B member 8	sp|O75190|DNJB6_HUMAN DnaJ homolog subfamily B member 6 OS=Homo sapiens OX=9606 GN=DNAJB6 PE=1 SV=2;sp|Q8NHS0|DNJB8_HUMAN DnaJ homolog subfamily B member 8 OS=Homo sapiens OX=9606 GN=DNAJB8 PE=1 SV=1	25.5365	25.5769	25.2797	26.1853	26.8316	25.7644	25.8698	26.9048
DNAJC11	Q9NVH1	DnaJ homolog subfamily C member 11	sp|Q9NVH1|DJC11_HUMAN DnaJ homolog subfamily C member 11 OS=Homo sapiens OX=9606 GN=DNAJC11 PE=1 SV=2	26.9214	26.6031	26.4405	26.5102	27.3563	26.9489	27.2715	27.105
DNAJC13	O75165	DnaJ homolog subfamily C member 13	sp|O75165|DJC13_HUMAN DnaJ homolog subfamily C member 13 OS=Homo sapiens OX=9606 GN=DNAJC13 PE=1 SV=5	NA	NA	22.3797	NA	NA	21.8062	22.5695	NA
DNAJC19	Q96DA6	Mitochondrial import inner membrane translocase subunit TIM14	sp|Q96DA6|TIM14_HUMAN Mitochondrial import inner membrane translocase subunit TIM14 OS=Homo sapiens OX=9606 GN=DNAJC19 PE=1 SV=3	24.6183	24.4697	24.7272	23.5031	23.9142	24.491	24.9445	25.2571
DNAJC3	Q13217	DnaJ homolog subfamily C member 3	sp|Q13217|DNJC3_HUMAN DnaJ homolog subfamily C member 3 OS=Homo sapiens OX=9606 GN=DNAJC3 PE=1 SV=1	NA	NA	NA	NA	NA	22.4704	NA	22.8627
DNAJC5	Q9H3Z4	DnaJ homolog subfamily C member 5	sp|Q9H3Z4|DNJC5_HUMAN DnaJ homolog subfamily C member 5 OS=Homo sapiens OX=9606 GN=DNAJC5 PE=1 SV=1	24.6651	25.0459	24.3592	24.5106	24.9099	24.9351	23.5763	25.4417
DNAJC6	O75061	Putative tyrosine-protein phosphatase auxilin	sp|O75061|AUXI_HUMAN Putative tyrosine-protein phosphatase auxilin OS=Homo sapiens OX=9606 GN=DNAJC6 PE=1 SV=3	27.7007	27.7146	27.7254	27.9308	27.1405	27.9463	27.8835	26.6433
DNAJC7	Q99615	DnaJ homolog subfamily C member 7	sp|Q99615|DNJC7_HUMAN DnaJ homolog subfamily C member 7 OS=Homo sapiens OX=9606 GN=DNAJC7 PE=1 SV=2	23.7937	23.7377	23.5437	23.8523	24.2758	24.5379	24.8728	23.555
DNAJC8	O75937	DnaJ homolog subfamily C member 8	sp|O75937|DNJC8_HUMAN DnaJ homolog subfamily C member 8 OS=Homo sapiens OX=9606 GN=DNAJC8 PE=1 SV=2	NA	23.2643	NA	NA	NA	NA	NA	NA
DNM1	Q05193	Dynamin-1	sp|Q05193|DYN1_HUMAN Dynamin-1 OS=Homo sapiens OX=9606 GN=DNM1 PE=1 SV=2	31.7816	31.5012	31.3513	31.4341	31.9138	32.0198	32.3461	32.0603
DNM1L	O00429	Dynamin-1-like protein	sp|O00429|DNM1L_HUMAN Dynamin-1-like protein OS=Homo sapiens OX=9606 GN=DNM1L PE=1 SV=2	29.6978	29.8716	29.8592	29.6341	29.0121	29.9944	30.3978	28.239
DNM2	P50570	Dynamin-2	sp|P50570|DYN2_HUMAN Dynamin-2 OS=Homo sapiens OX=9606 GN=DNM2 PE=1 SV=2	26.8496	26.8753	26.5766	26.8025	27.7128	26.53	27.2758	27.1311
DNM3	Q9UQ16	Dynamin-3	sp|Q9UQ16|DYN3_HUMAN Dynamin-3 OS=Homo sapiens OX=9606 GN=DNM3 PE=1 SV=4	28.2079	28.3796	28.0457	28.3569	27.7225	28.1322	27.9936	27.6442
DOC2A	Q14183	Double C2-like domain-containing protein alpha	sp|Q14183|DOC2A_HUMAN Double C2-like domain-containing protein alpha OS=Homo sapiens OX=9606 GN=DOC2A PE=1 SV=5	23.3943	23.2416	23.7075	23.5479	NA	24.0705	24.0828	24.3681
DOCK10	Q96BY6	Dedicator of cytokinesis protein 10	sp|Q96BY6|DOC10_HUMAN Dedicator of cytokinesis protein 10 OS=Homo sapiens OX=9606 GN=DOCK10 PE=1 SV=3	NA	NA	NA	21.6234	NA	NA	NA	NA
DOCK3	Q8IZD9	Dedicator of cytokinesis protein 3	sp|Q8IZD9|DOCK3_HUMAN Dedicator of cytokinesis protein 3 OS=Homo sapiens OX=9606 GN=DOCK3 PE=1 SV=1	NA	22.2803	22.3813	22.2314	22.0502	22.4481	22.4812	NA
DOCK9	Q9BZ29	Dedicator of cytokinesis protein 9	sp|Q9BZ29|DOCK9_HUMAN Dedicator of cytokinesis protein 9 OS=Homo sapiens OX=9606 GN=DOCK9 PE=1 SV=2	23.0736	23.3393	23.2676	23.2261	NA	23.3005	NA	NA
DOS	Q8N350	Protein Dos	sp|Q8N350|CBARP_HUMAN Voltage-dependent calcium channel beta subunit-associated regulatory protein OS=Homo sapiens OX=9606 GN=CBARP PE=1 SV=3	23.3543	23.8535	24.3846	22.9553	24.4519	23.8328	24.6567	23.4529
DPM1	O60762	Dolichol-phosphate mannosyltransferase subunit 1	sp|O60762|DPM1_HUMAN Dolichol-phosphate mannosyltransferase subunit 1 OS=Homo sapiens OX=9606 GN=DPM1 PE=1 SV=1	23.6701	23.5025	23.3628	23.4002	24.4399	23.6736	23.4081	23.4754
DPP10	Q8N608	Inactive dipeptidyl peptidase 10	sp|Q8N608|DPP10_HUMAN Inactive dipeptidyl peptidase 10 OS=Homo sapiens OX=9606 GN=DPP10 PE=1 SV=2	27.6135	27.5897	27.4124	26.5644	26.9091	28.2131	28.1312	27.3112
DPP3	Q9NY33	Dipeptidyl peptidase 3	sp|Q9NY33|DPP3_HUMAN Dipeptidyl peptidase 3 OS=Homo sapiens OX=9606 GN=DPP3 PE=1 SV=2	24.705	24.6597	24.8947	24.6255	24.6857	24.115	24.8789	NA
DPP6	P42658	Dipeptidyl aminopeptidase-like protein 6	sp|P42658|DPP6_HUMAN Dipeptidyl aminopeptidase-like protein 6 OS=Homo sapiens OX=9606 GN=DPP6 PE=1 SV=2	28.0599	28.3412	28.26	27.8593	27.5881	28.6233	28.8931	28.0645
DPP7	Q9UHL4	Dipeptidyl peptidase 2	sp|Q9UHL4|DPP2_HUMAN Dipeptidyl peptidase 2 OS=Homo sapiens OX=9606 GN=DPP7 PE=1 SV=3	NA	23.405	22.0507	22.3236	22.5897	NA	22.2207	NA
DPY30	Q9C005	Protein dpy-30 homolog	sp|Q9C005|DPY30_HUMAN Protein dpy-30 homolog OS=Homo sapiens OX=9606 GN=DPY30 PE=1 SV=1	23.7887	23.4224	NA	23.7778	NA	23.7147	23.6727	NA
DPYSL2	Q16555	Dihydropyrimidinase-related protein 2	sp|Q16555|DPYL2_HUMAN Dihydropyrimidinase-related protein 2 OS=Homo sapiens OX=9606 GN=DPYSL2 PE=1 SV=1	31.8142	32.1516	31.5526	32.1953	29.8819	30.5021	30.9374	30.2837
DPYSL3	Q14195	Dihydropyrimidinase-related protein 3	sp|Q14195|DPYL3_HUMAN Dihydropyrimidinase-related protein 3 OS=Homo sapiens OX=9606 GN=DPYSL3 PE=1 SV=1	27.283	27.9054	27.3708	27.9815	24.0458	25.7998	25.6236	25.6394
DPYSL4	O14531	Dihydropyrimidinase-related protein 4	sp|O14531|DPYL4_HUMAN Dihydropyrimidinase-related protein 4 OS=Homo sapiens OX=9606 GN=DPYSL4 PE=1 SV=2	26.8267	27.2685	27.2906	27.3916	26.7929	27.4895	27.9349	27.0448
DPYSL5	Q9BPU6	Dihydropyrimidinase-related protein 5	sp|Q9BPU6|DPYL5_HUMAN Dihydropyrimidinase-related protein 5 OS=Homo sapiens OX=9606 GN=DPYSL5 PE=1 SV=1	27.1333	27.4113	27.1693	27.2846	25.5881	26.9809	27.6054	26.4473
DR1	Q01658	Protein Dr1	sp|Q01658|NC2B_HUMAN Protein Dr1 OS=Homo sapiens OX=9606 GN=DR1 PE=1 SV=1	22.9287	22.8484	22.1784	23.3472	NA	22.5687	NA	NA
DST	Q03001	Dystonin	sp|Q03001|DYST_HUMAN Dystonin OS=Homo sapiens OX=9606 GN=DST PE=1 SV=4	29.0749	29.1141	29.3055	29.3549	29.9296	29.3064	29.4279	29.5105
DSTN	P60981	Destrin	sp|P60981|DEST_HUMAN Destrin OS=Homo sapiens OX=9606 GN=DSTN PE=1 SV=3	26.9078	27.1244	27.5568	27.4024	26.9682	27.3864	27.5722	26.8643
DTD1	Q8TEA8	D-tyrosyl-tRNA(Tyr) deacylase 1	sp|Q8TEA8|DTD1_HUMAN D-aminoacyl-tRNA deacylase 1 OS=Homo sapiens OX=9606 GN=DTD1 PE=1 SV=2	NA	NA	NA	24.4765	NA	21.8812	NA	NA
DTNA	Q9Y4J8	Dystrobrevin alpha	sp|Q9Y4J8|DTNA_HUMAN Dystrobrevin alpha OS=Homo sapiens OX=9606 GN=DTNA PE=1 SV=2	26.4299	25.867	26.4794	26.4191	25.0588	26.1783	25.8077	25.8694
DUSP23	Q9BVJ7	Dual specificity protein phosphatase 23	sp|Q9BVJ7|DUS23_HUMAN Dual specificity protein phosphatase 23 OS=Homo sapiens OX=9606 GN=DUSP23 PE=1 SV=1	NA	NA	NA	NA	NA	23.9152	NA	NA
DUSP3	P51452	Dual specificity protein phosphatase 3	sp|P51452|DUS3_HUMAN Dual specificity protein phosphatase 3 OS=Homo sapiens OX=9606 GN=DUSP3 PE=1 SV=1	25.8727	26.7028	26.7142	26.3512	25.4784	27.1694	27.5276	25.2282
DYNC1H1	Q14204	Cytoplasmic dynein 1 heavy chain 1	sp|Q14204|DYHC1_HUMAN Cytoplasmic dynein 1 heavy chain 1 OS=Homo sapiens OX=9606 GN=DYNC1H1 PE=1 SV=5	31.6961	31.9251	31.9974	31.788	32.1037	32.1704	32.2244	31.7611
DYNC1I1	O14576	Cytoplasmic dynein 1 intermediate chain 1	sp|O14576|DC1I1_HUMAN Cytoplasmic dynein 1 intermediate chain 1 OS=Homo sapiens OX=9606 GN=DYNC1I1 PE=1 SV=2	27.5243	27.7844	27.7681	27.6582	26.7917	27.3592	28.2013	27.2817
DYNC1I2	Q13409	Cytoplasmic dynein 1 intermediate chain 2	sp|Q13409|DC1I2_HUMAN Cytoplasmic dynein 1 intermediate chain 2 OS=Homo sapiens OX=9606 GN=DYNC1I2 PE=1 SV=3	26.2615	26.2045	26.3706	26.745	25.7545	25.8125	26.992	25.8124
DYNC1LI1	Q9Y6G9	Cytoplasmic dynein 1 light intermediate chain 1	sp|Q9Y6G9|DC1L1_HUMAN Cytoplasmic dynein 1 light intermediate chain 1 OS=Homo sapiens OX=9606 GN=DYNC1LI1 PE=1 SV=3	26.3748	26.8597	26.7512	26.9319	25.1375	25.902	26.5073	25.4992
DYNC1LI2	O43237	Cytoplasmic dynein 1 light intermediate chain 2	sp|O43237|DC1L2_HUMAN Cytoplasmic dynein 1 light intermediate chain 2 OS=Homo sapiens OX=9606 GN=DYNC1LI2 PE=1 SV=1	26.6675	26.7735	26.9977	27.1693	26.5405	26.8638	27.1609	25.9275
DYNLL1	P63167	Dynein light chain 1, cytoplasmic	sp|P63167|DYL1_HUMAN Dynein light chain 1, cytoplasmic OS=Homo sapiens OX=9606 GN=DYNLL1 PE=1 SV=1	23.8759	22.9475	NA	23.7604	23.4131	24.7653	NA	23.1924
DYNLL2	Q96FJ2	Dynein light chain 2, cytoplasmic	sp|Q96FJ2|DYL2_HUMAN Dynein light chain 2, cytoplasmic OS=Homo sapiens OX=9606 GN=DYNLL2 PE=1 SV=1	25.0402	NA	NA	NA	NA	NA	25.7867	25.6131
DYNLRB1	Q9NP97	Dynein light chain roadblock-type 1;Dynein light chain roadblock-type 2	sp|Q9NP97|DLRB1_HUMAN Dynein light chain roadblock-type 1 OS=Homo sapiens OX=9606 GN=DYNLRB1 PE=1 SV=3;sp|Q8TF09|DLRB2_HUMAN Dynein light chain roadblock-type 2 OS=Homo sapiens OX=9606 GN=DYNLRB2 PE=1 SV=1	24.3048	23.9364	24.0935	25.1474	25.5131	25.7352	25.707	26.0675
EARS2	Q5JPH6	Probable glutamate--tRNA ligase, mitochondrial	sp|Q5JPH6|SYEM_HUMAN Probable glutamate--tRNA ligase, mitochondrial OS=Homo sapiens OX=9606 GN=EARS2 PE=1 SV=2	25.9075	26.0377	25.8555	25.4785	25.5397	26.0327	26.0493	26.4759
ECH1	Q13011	Delta(3,5)-Delta(2,4)-dienoyl-CoA isomerase, mitochondrial	sp|Q13011|ECH1_HUMAN Delta(3,5)-Delta(2,4)-dienoyl-CoA isomerase, mitochondrial OS=Homo sapiens OX=9606 GN=ECH1 PE=1 SV=2	26.549	26.7864	26.4145	27.1745	NA	24.7746	24.0121	24.4691
ECHDC1	Q9NTX5	Ethylmalonyl-CoA decarboxylase	sp|Q9NTX5|ECHD1_HUMAN Ethylmalonyl-CoA decarboxylase OS=Homo sapiens OX=9606 GN=ECHDC1 PE=1 SV=2	23.9071	24.3336	24.238	24.117	NA	NA	23.2341	NA
ECHS1	P30084	Enoyl-CoA hydratase, mitochondrial	sp|P30084|ECHM_HUMAN Enoyl-CoA hydratase, mitochondrial OS=Homo sapiens OX=9606 GN=ECHS1 PE=1 SV=4	28.2044	28.9326	28.5957	28.911	25.5334	26.0194	26.9441	25.2025
ECI1	P42126	Enoyl-CoA delta isomerase 1, mitochondrial	sp|P42126|ECI1_HUMAN Enoyl-CoA delta isomerase 1, mitochondrial OS=Homo sapiens OX=9606 GN=ECI1 PE=1 SV=1	24.4773	24.4775	24.0746	24.2822	23.7254	23.6384	25.0715	23.7016
ECI2	O75521	Enoyl-CoA delta isomerase 2, mitochondrial	sp|O75521|ECI2_HUMAN Enoyl-CoA delta isomerase 2, mitochondrial OS=Homo sapiens OX=9606 GN=ECI2 PE=1 SV=4	22.7224	NA	23.1372	23.785	NA	NA	NA	NA
ECM29	Q5VYK3	Proteasome-associated protein ECM29 homolog	sp|Q5VYK3|ECM29_HUMAN Proteasome adapter and scaffold protein ECM29 OS=Homo sapiens OX=9606 GN=ECPAS PE=1 SV=2	23.3477	23.9991	23.959	24.0063	24.8212	23.939	24.4995	24.3233
EDC4	Q6P2E9	Enhancer of mRNA-decapping protein 4	sp|Q6P2E9|EDC4_HUMAN Enhancer of mRNA-decapping protein 4 OS=Homo sapiens OX=9606 GN=EDC4 PE=1 SV=1	23.7377	22.97	NA	NA	23.9699	22.8512	22.9321	NA
EDF1	O60869	Endothelial differentiation-related factor 1	sp|O60869|EDF1_HUMAN Endothelial differentiation-related factor 1 OS=Homo sapiens OX=9606 GN=EDF1 PE=1 SV=1	23.8274	23.3418	23.5387	22.957	NA	23.5179	NA	NA
EEA1	Q15075	Early endosome antigen 1	sp|Q15075|EEA1_HUMAN Early endosome antigen 1 OS=Homo sapiens OX=9606 GN=EEA1 PE=1 SV=2	28.0815	27.9117	28.0883	28.2179	NA	26.7705	26.2896	24.541
EEF1A1	P68104	Elongation factor 1-alpha 1;Putative elongation factor 1-alpha-like 3	sp|P68104|EF1A1_HUMAN Elongation factor 1-alpha 1 OS=Homo sapiens OX=9606 GN=EEF1A1 PE=1 SV=1;sp|Q5VTE0|EF1A3_HUMAN Putative elongation factor 1-alpha-like 3 OS=Homo sapiens OX=9606 GN=EEF1A1P5 PE=5 SV=1	28.5827	28.8364	28.5987	29.038	30.4258	28.9842	29.7707	29.5962
EEF1A2	Q05639	Elongation factor 1-alpha 2	sp|Q05639|EF1A2_HUMAN Elongation factor 1-alpha 2 OS=Homo sapiens OX=9606 GN=EEF1A2 PE=1 SV=1	27.6716	28.1822	27.5533	28.0928	28.0982	27.9859	28.8188	27.7087
EEF1B2	P24534	Elongation factor 1-beta	sp|P24534|EF1B_HUMAN Elongation factor 1-beta OS=Homo sapiens OX=9606 GN=EEF1B2 PE=1 SV=3	27.1849	26.8078	27.0834	27.0508	26.5205	27.0691	28.2544	26.8434
EEF1D	P29692	Elongation factor 1-delta	sp|P29692|EF1D_HUMAN Elongation factor 1-delta OS=Homo sapiens OX=9606 GN=EEF1D PE=1 SV=5	25.9419	25.86	26.0721	25.9685	25.2586	25.5822	25.8349	24.9335
EEF1E1	O43324	Eukaryotic translation elongation factor 1 epsilon-1	sp|O43324|MCA3_HUMAN Eukaryotic translation elongation factor 1 epsilon-1 OS=Homo sapiens OX=9606 GN=EEF1E1 PE=1 SV=1	24.114	24.4718	24.8571	24.4462	23.6051	23.8131	25.0365	24.4432
EEF1G	P26641	Elongation factor 1-gamma	sp|P26641|EF1G_HUMAN Elongation factor 1-gamma OS=Homo sapiens OX=9606 GN=EEF1G PE=1 SV=3	28.5895	28.612	28.4338	28.3885	28.2732	28.6615	29.2587	27.8202
EEF2	P13639	Elongation factor 2	sp|P13639|EF2_HUMAN Elongation factor 2 OS=Homo sapiens OX=9606 GN=EEF2 PE=1 SV=4	28.668	28.7299	28.8093	28.8041	28.3125	28.7018	28.4804	27.915
EFHD1	Q9BUP0	EF-hand domain-containing protein D1	sp|Q9BUP0|EFHD1_HUMAN EF-hand domain-containing protein D1 OS=Homo sapiens OX=9606 GN=EFHD1 PE=1 SV=1	NA	NA	NA	23.51	NA	NA	NA	NA
EFHD2	Q96C19	EF-hand domain-containing protein D2	sp|Q96C19|EFHD2_HUMAN EF-hand domain-containing protein D2 OS=Homo sapiens OX=9606 GN=EFHD2 PE=1 SV=1	27.0779	27.4605	27.2126	27.3307	25.9991	26.2211	26.2749	25.6063
EFR3B	Q9Y2G0	Protein EFR3 homolog B	sp|Q9Y2G0|EFR3B_HUMAN Protein EFR3 homolog B OS=Homo sapiens OX=9606 GN=EFR3B PE=1 SV=2	24.3026	24.3389	24.1094	23.8759	25.1829	24.591	24.1193	24.3243
EFTUD2	Q15029	116 kDa U5 small nuclear ribonucleoprotein component	sp|Q15029|U5S1_HUMAN 116 kDa U5 small nuclear ribonucleoprotein component OS=Homo sapiens OX=9606 GN=EFTUD2 PE=1 SV=1	23.7673	23.3229	23.1753	23.6057	23.3095	23.5593	23.7772	23.6533
EHBP1	Q8NDI1	EH domain-binding protein 1	sp|Q8NDI1|EHBP1_HUMAN EH domain-binding protein 1 OS=Homo sapiens OX=9606 GN=EHBP1 PE=1 SV=3	NA	NA	21.4428	21.8051	NA	22.8505	NA	22.4284
EHD1	Q9H4M9	EH domain-containing protein 1	sp|Q9H4M9|EHD1_HUMAN EH domain-containing protein 1 OS=Homo sapiens OX=9606 GN=EHD1 PE=1 SV=2	25.6701	25.839	25.7406	25.9563	26.3107	26.2117	26.1725	26.1002
EHD2	Q9NZN4	EH domain-containing protein 2	sp|Q9NZN4|EHD2_HUMAN EH domain-containing protein 2 OS=Homo sapiens OX=9606 GN=EHD2 PE=1 SV=2	NA	22.8768	21.6403	22.4961	NA	22.1577	22.5691	22.162
EHD3	Q9NZN3	EH domain-containing protein 3	sp|Q9NZN3|EHD3_HUMAN EH domain-containing protein 3 OS=Homo sapiens OX=9606 GN=EHD3 PE=1 SV=2	28.4994	28.0743	28.2035	28.043	28.7405	28.5772	28.0635	28.2683
EHD4	Q9H223	EH domain-containing protein 4	sp|Q9H223|EHD4_HUMAN EH domain-containing protein 4 OS=Homo sapiens OX=9606 GN=EHD4 PE=1 SV=1	23.4545	23.7689	NA	24.2636	25.2236	26.17	24.832	24.7991
EIF1AX	P47813	Eukaryotic translation initiation factor 1A, X-chromosomal;Eukaryotic translation initiation factor 1A, Y-chromosomal	sp|P47813|IF1AX_HUMAN Eukaryotic translation initiation factor 1A, X-chromosomal OS=Homo sapiens OX=9606 GN=EIF1AX PE=1 SV=2;sp|O14602|IF1AY_HUMAN Eukaryotic translation initiation factor 1A, Y-chromosomal OS=Homo sapiens OX=9606 GN=EIF1AY PE=1 SV=4	NA	NA	22.2859	NA	NA	23.4686	NA	NA
EIF2A	Q9BY44	Eukaryotic translation initiation factor 2A;Eukaryotic translation initiation factor 2A, N-terminally processed	sp|Q9BY44|EIF2A_HUMAN Eukaryotic translation initiation factor 2A OS=Homo sapiens OX=9606 GN=EIF2A PE=1 SV=3	22.8378	22.9847	22.765	22.5298	23.2936	23.3321	23.4666	23.7503
EIF2AK2	P19525	Interferon-induced, double-stranded RNA-activated protein kinase	sp|P19525|E2AK2_HUMAN Interferon-induced, double-stranded RNA-activated protein kinase OS=Homo sapiens OX=9606 GN=EIF2AK2 PE=1 SV=2	24.7029	24.7762	24.9992	24.9975	25.3394	24.5699	25.1499	25.2502
EIF2B3	Q9NR50	Translation initiation factor eIF-2B subunit gamma	sp|Q9NR50|EI2BG_HUMAN Translation initiation factor eIF-2B subunit gamma OS=Homo sapiens OX=9606 GN=EIF2B3 PE=1 SV=1	22.8589	23.062	23.2428	23.3203	NA	NA	NA	23.6624
EIF2B4	Q9UI10	Translation initiation factor eIF-2B subunit delta	sp|Q9UI10|EI2BD_HUMAN Translation initiation factor eIF-2B subunit delta OS=Homo sapiens OX=9606 GN=EIF2B4 PE=1 SV=2	23.2203	22.6651	22.4555	22.7766	NA	21.9651	NA	22.2036
EIF2B5	Q13144	Translation initiation factor eIF-2B subunit epsilon	sp|Q13144|EI2BE_HUMAN Translation initiation factor eIF-2B subunit epsilon OS=Homo sapiens OX=9606 GN=EIF2B5 PE=1 SV=3	22.6752	NA	22.8908	22.7217	NA	22.2339	NA	22.5918
EIF2S1	P05198	Eukaryotic translation initiation factor 2 subunit 1	sp|P05198|IF2A_HUMAN Eukaryotic translation initiation factor 2 subunit 1 OS=Homo sapiens OX=9606 GN=EIF2S1 PE=1 SV=3	25.0032	25.0167	25.209	25.3998	24.1401	24.1332	24.5937	24.0544
EIF2S2	P20042	Eukaryotic translation initiation factor 2 subunit 2	sp|P20042|IF2B_HUMAN Eukaryotic translation initiation factor 2 subunit 2 OS=Homo sapiens OX=9606 GN=EIF2S2 PE=1 SV=2	23.0527	24.026	24.2063	24.3836	NA	23.62	NA	24.1686
EIF2S3	P41091	Eukaryotic translation initiation factor 2 subunit 3;Putative eukaryotic translation initiation factor 2 subunit 3-like protein	sp|P41091|IF2G_HUMAN Eukaryotic translation initiation factor 2 subunit 3 OS=Homo sapiens OX=9606 GN=EIF2S3 PE=1 SV=3;sp|Q2VIR3|IF2GL_HUMAN Eukaryotic translation initiation factor 2 subunit 3B OS=Homo sapiens OX=9606 GN=EIF2S3B PE=2 SV=2	24.295	24.4188	24.5669	24.5316	NA	23.6828	NA	NA
EIF3A	Q14152	Eukaryotic translation initiation factor 3 subunit A	sp|Q14152|EIF3A_HUMAN Eukaryotic translation initiation factor 3 subunit A OS=Homo sapiens OX=9606 GN=EIF3A PE=1 SV=1	26.2527	26.4333	26.5157	26.3023	26.4076	26.761	27.1658	26.1289
EIF3B	P55884	Eukaryotic translation initiation factor 3 subunit B	sp|P55884|EIF3B_HUMAN Eukaryotic translation initiation factor 3 subunit B OS=Homo sapiens OX=9606 GN=EIF3B PE=1 SV=3	24.6805	25.3497	25.195	25.1608	24.3475	24.928	24.8646	23.7561
EIF3C	Q99613	Eukaryotic translation initiation factor 3 subunit C;Eukaryotic translation initiation factor 3 subunit C-like protein	sp|Q99613|EIF3C_HUMAN Eukaryotic translation initiation factor 3 subunit C OS=Homo sapiens OX=9606 GN=EIF3C PE=1 SV=1;sp|B5ME19|EIFCL_HUMAN Eukaryotic translation initiation factor 3 subunit C-like protein OS=Homo sapiens OX=9606 GN=EIF3CL PE=3 SV=1	23.8937	24.1399	24.3442	23.9986	24.3045	24.5207	23.937	24.271
EIF3D	O15371	Eukaryotic translation initiation factor 3 subunit D	sp|O15371|EIF3D_HUMAN Eukaryotic translation initiation factor 3 subunit D OS=Homo sapiens OX=9606 GN=EIF3D PE=1 SV=1	23.9727	23.9888	23.9069	24.0921	23.9966	24.0716	23.3956	NA
EIF3E	P60228	Eukaryotic translation initiation factor 3 subunit E	sp|P60228|EIF3E_HUMAN Eukaryotic translation initiation factor 3 subunit E OS=Homo sapiens OX=9606 GN=EIF3E PE=1 SV=1	24.3052	24.1036	24.4228	24.237	NA	23.5941	22.4325	23.2211
EIF3F	O00303	Eukaryotic translation initiation factor 3 subunit F	sp|O00303|EIF3F_HUMAN Eukaryotic translation initiation factor 3 subunit F OS=Homo sapiens OX=9606 GN=EIF3F PE=1 SV=1	23.9645	23.79	23.9154	24.742	23.2466	24.2689	24.2794	NA
EIF3G	O75821	Eukaryotic translation initiation factor 3 subunit G	sp|O75821|EIF3G_HUMAN Eukaryotic translation initiation factor 3 subunit G OS=Homo sapiens OX=9606 GN=EIF3G PE=1 SV=2	22.9831	23.1472	24.1258	24.0146	23.9536	23.6588	24.2245	23.4847
EIF3H	O15372	Eukaryotic translation initiation factor 3 subunit H	sp|O15372|EIF3H_HUMAN Eukaryotic translation initiation factor 3 subunit H OS=Homo sapiens OX=9606 GN=EIF3H PE=1 SV=1	23.7782	23.6307	23.2977	23.6539	23.0211	23.8111	23.1684	23.2496
EIF3I	Q13347	Eukaryotic translation initiation factor 3 subunit I	sp|Q13347|EIF3I_HUMAN Eukaryotic translation initiation factor 3 subunit I OS=Homo sapiens OX=9606 GN=EIF3I PE=1 SV=1	NA	22.3956	22.3593	22.7658	NA	NA	22.5475	NA
EIF3J	O75822	Eukaryotic translation initiation factor 3 subunit J	sp|O75822|EIF3J_HUMAN Eukaryotic translation initiation factor 3 subunit J OS=Homo sapiens OX=9606 GN=EIF3J PE=1 SV=2	26.4102	26.354	26.2375	26.5795	25.2107	25.3716	26.9233	NA
EIF3K	Q9UBQ5	Eukaryotic translation initiation factor 3 subunit K	sp|Q9UBQ5|EIF3K_HUMAN Eukaryotic translation initiation factor 3 subunit K OS=Homo sapiens OX=9606 GN=EIF3K PE=1 SV=1	24.0335	23.6012	24.0825	23.6811	23.915	24.4406	23.8216	NA
EIF3L	Q9Y262	Eukaryotic translation initiation factor 3 subunit L	sp|Q9Y262|EIF3L_HUMAN Eukaryotic translation initiation factor 3 subunit L OS=Homo sapiens OX=9606 GN=EIF3L PE=1 SV=1	24.8318	24.9011	24.9299	24.7088	25.053	25.2585	25.3969	24.7642
EIF4A1	P60842	Eukaryotic initiation factor 4A-I	sp|P60842|IF4A1_HUMAN Eukaryotic initiation factor 4A-I OS=Homo sapiens OX=9606 GN=EIF4A1 PE=1 SV=1	25.6897	25.8235	25.7386	25.906	27.4254	26.0108	26.417	26.7566
EIF4A2	Q14240	Eukaryotic initiation factor 4A-II;Eukaryotic initiation factor 4A-II, N-terminally processed	sp|Q14240|IF4A2_HUMAN Eukaryotic initiation factor 4A-II OS=Homo sapiens OX=9606 GN=EIF4A2 PE=1 SV=2	27.5237	27.7529	27.6449	27.6078	27.0077	27.5911	28.0683	26.6759
EIF4A3	P38919	Eukaryotic initiation factor 4A-III;Eukaryotic initiation factor 4A-III, N-terminally processed	sp|P38919|IF4A3_HUMAN Eukaryotic initiation factor 4A-III OS=Homo sapiens OX=9606 GN=EIF4A3 PE=1 SV=4	24.2525	24.6836	24.9085	25.002	25.5191	24.8104	24.0007	25.6494
EIF4B	P23588	Eukaryotic translation initiation factor 4B	sp|P23588|IF4B_HUMAN Eukaryotic translation initiation factor 4B OS=Homo sapiens OX=9606 GN=EIF4B PE=1 SV=2	25.6356	25.2452	25.0844	25.4342	24.6013	24.9618	25.0295	25.12
EIF4G1	Q04637	Eukaryotic translation initiation factor 4 gamma 1	sp|Q04637|IF4G1_HUMAN Eukaryotic translation initiation factor 4 gamma 1 OS=Homo sapiens OX=9606 GN=EIF4G1 PE=1 SV=4	25.0197	25.1451	25.488	25.4996	25.8151	25.3746	25.8315	24.2757
EIF4G2	P78344	Eukaryotic translation initiation factor 4 gamma 2	sp|P78344|IF4G2_HUMAN Eukaryotic translation initiation factor 4 gamma 2 OS=Homo sapiens OX=9606 GN=EIF4G2 PE=1 SV=1	25.211	25.3862	25.5264	25.4764	26.3814	25.823	26.2646	24.825
EIF4G3	O43432	Eukaryotic translation initiation factor 4 gamma 3	sp|O43432|IF4G3_HUMAN Eukaryotic translation initiation factor 4 gamma 3 OS=Homo sapiens OX=9606 GN=EIF4G3 PE=1 SV=2	24.408	24.9994	26.1528	24.4219	24.3672	25.5378	24.8565	25.5903
EIF4H	Q15056	Eukaryotic translation initiation factor 4H	sp|Q15056|IF4H_HUMAN Eukaryotic translation initiation factor 4H OS=Homo sapiens OX=9606 GN=EIF4H PE=1 SV=5	28.1365	28.0175	27.81	27.9372	28.914	28.799	28.9262	28.6585
EIF5	P55010	Eukaryotic translation initiation factor 5	sp|P55010|IF5_HUMAN Eukaryotic translation initiation factor 5 OS=Homo sapiens OX=9606 GN=EIF5 PE=1 SV=2	26.114	26.5148	26.3372	26.5058	27.1404	26.9357	27.7764	26.5499
EIF5A	P63241	Eukaryotic translation initiation factor 5A-1;Eukaryotic translation initiation factor 5A-1-like	sp|P63241|IF5A1_HUMAN Eukaryotic translation initiation factor 5A-1 OS=Homo sapiens OX=9606 GN=EIF5A PE=1 SV=2;sp|Q6IS14|IF5AL_HUMAN Eukaryotic translation initiation factor 5A-1-like OS=Homo sapiens OX=9606 GN=EIF5AL1 PE=2 SV=2	23.2234	23.9159	23.7252	24.3988	NA	24.1547	NA	NA
EIF5B	O60841	Eukaryotic translation initiation factor 5B	sp|O60841|IF2P_HUMAN Eukaryotic translation initiation factor 5B OS=Homo sapiens OX=9606 GN=EIF5B PE=1 SV=4	22.7216	NA	22.5457	22.9537	23.9498	22.8816	NA	NA
ELAVL1	Q15717	ELAV-like protein 1	sp|Q15717|ELAV1_HUMAN ELAV-like protein 1 OS=Homo sapiens OX=9606 GN=ELAVL1 PE=1 SV=2	24.7378	25.1993	25.3342	24.9985	25.7786	25.5655	25.6794	26.1475
ELAVL2	Q12926	ELAV-like protein 2	sp|Q12926|ELAV2_HUMAN ELAV-like protein 2 OS=Homo sapiens OX=9606 GN=ELAVL2 PE=1 SV=2	NA	24.1026	24.7317	24.141	25.0305	24.5727	24.6812	NA
ELAVL3	Q14576	ELAV-like protein 3	sp|Q14576|ELAV3_HUMAN ELAV-like protein 3 OS=Homo sapiens OX=9606 GN=ELAVL3 PE=2 SV=3	NA	23.0773	23.5025	23.7881	23.8449	23.2964	23.5634	NA
ELAVL4	P26378	ELAV-like protein 4	sp|P26378|ELAV4_HUMAN ELAV-like protein 4 OS=Homo sapiens OX=9606 GN=ELAVL4 PE=1 SV=2	23.1151	23.3059	23.4731	23.5603	24.2961	23.797	NA	24.1187
ELMO1	Q92556	Engulfment and cell motility protein 1	sp|Q92556|ELMO1_HUMAN Engulfment and cell motility protein 1 OS=Homo sapiens OX=9606 GN=ELMO1 PE=1 SV=2	24.014	24.1742	24.2644	24.495	NA	23.3492	NA	NA
ELMO2	Q96JJ3	Engulfment and cell motility protein 2	sp|Q96JJ3|ELMO2_HUMAN Engulfment and cell motility protein 2 OS=Homo sapiens OX=9606 GN=ELMO2 PE=1 SV=2	22.2444	22.352	22.0737	22.2069	NA	21.8269	NA	NA
EMC1	Q8N766	ER membrane protein complex subunit 1	sp|Q8N766|EMC1_HUMAN ER membrane protein complex subunit 1 OS=Homo sapiens OX=9606 GN=EMC1 PE=1 SV=1	24.2461	24.3645	24.2061	24.0244	25.0983	24.8793	24.8574	24.886
EMC2	Q15006	ER membrane protein complex subunit 2	sp|Q15006|EMC2_HUMAN ER membrane protein complex subunit 2 OS=Homo sapiens OX=9606 GN=EMC2 PE=1 SV=1	23.9168	23.5458	23.4069	23.407	23.4775	23.6614	23.1064	23.1312
EMC3	Q9P0I2	ER membrane protein complex subunit 3	sp|Q9P0I2|EMC3_HUMAN ER membrane protein complex subunit 3 OS=Homo sapiens OX=9606 GN=EMC3 PE=1 SV=3	NA	22.1989	22.5838	NA	NA	NA	NA	NA
EMD	P50402	Emerin	sp|P50402|EMD_HUMAN Emerin OS=Homo sapiens OX=9606 GN=EMD PE=1 SV=1	24.7366	24.8891	24.823	24.5414	26.3254	25.2523	25.2615	26.1419
EML2	O95834	Echinoderm microtubule-associated protein-like 2	sp|O95834|EMAL2_HUMAN Echinoderm microtubule-associated protein-like 2 OS=Homo sapiens OX=9606 GN=EML2 PE=1 SV=1	23.8867	23.621	22.9129	24.0806	NA	NA	NA	NA
ENAH	Q8N8S7	Protein enabled homolog	sp|Q8N8S7|ENAH_HUMAN Protein enabled homolog OS=Homo sapiens OX=9606 GN=ENAH PE=1 SV=2	23.2396	23.3359	23.3491	NA	22.3721	22.5967	NA	23.088
ENDOD1	O94919	Endonuclease domain-containing 1 protein	sp|O94919|ENDD1_HUMAN Endonuclease domain-containing 1 protein OS=Homo sapiens OX=9606 GN=ENDOD1 PE=1 SV=2	25.229	25.4012	25.529	25.4009	25.9628	25.1224	25.2741	25.3104
ENO1	P06733	Alpha-enolase	sp|P06733|ENOA_HUMAN Alpha-enolase OS=Homo sapiens OX=9606 GN=ENO1 PE=1 SV=2	29.0493	29.0735	29.062	30.7698	27.8964	28.4766	28.1933	28.3127
ENO2	P09104	Gamma-enolase	sp|P09104|ENOG_HUMAN Gamma-enolase OS=Homo sapiens OX=9606 GN=ENO2 PE=1 SV=3	28.2257	28.8494	29.0101	30.875	26.6048	27.3132	27.156	27.0714
ENOPH1	Q9UHY7	Enolase-phosphatase E1	sp|Q9UHY7|ENOPH_HUMAN Enolase-phosphatase E1 OS=Homo sapiens OX=9606 GN=ENOPH1 PE=1 SV=1	25.7342	26.4605	26.1919	26.4447	23.9111	25.637	25.9668	NA
ENPP4	Q9Y6X5	Bis(5-adenosyl)-triphosphatase ENPP4	sp|Q9Y6X5|ENPP4_HUMAN Bis(5-adenosyl)-triphosphatase ENPP4 OS=Homo sapiens OX=9606 GN=ENPP4 PE=1 SV=3	22.3279	23.6558	23.9862	22.2216	24.088	23.499	22.9455	NA
ENPP6	Q6UWR7	Ectonucleotide pyrophosphatase/phosphodiesterase family member 6	sp|Q6UWR7|ENPP6_HUMAN Ectonucleotide pyrophosphatase/phosphodiesterase family member 6 OS=Homo sapiens OX=9606 GN=ENPP6 PE=1 SV=2	24.8678	25.7104	26.5169	26.3992	25.5438	24.9664	25.9581	23.2
EPB41	P11171	Protein 4.1	sp|P11171|41_HUMAN Protein 4.1 OS=Homo sapiens OX=9606 GN=EPB41 PE=1 SV=4	NA	NA	NA	NA	NA	23.1688	23.4553	23.1058
EPB41L1	Q9H4G0	Band 4.1-like protein 1	sp|Q9H4G0|E41L1_HUMAN Band 4.1-like protein 1 OS=Homo sapiens OX=9606 GN=EPB41L1 PE=1 SV=2	29.5553	29.476	29.4207	29.5388	29.9801	29.9756	30.0483	30.4116
EPB41L2	O43491	Band 4.1-like protein 2	sp|O43491|E41L2_HUMAN Band 4.1-like protein 2 OS=Homo sapiens OX=9606 GN=EPB41L2 PE=1 SV=1	27.8541	27.4428	28.1391	28.7717	27.1651	26.9214	26.7265	27.2167
EPB41L3	Q9Y2J2	Band 4.1-like protein 3;Band 4.1-like protein 3, N-terminally processed	sp|Q9Y2J2|E41L3_HUMAN Band 4.1-like protein 3 OS=Homo sapiens OX=9606 GN=EPB41L3 PE=1 SV=2	30.635	30.7162	30.6556	30.6001	30.747	30.8711	30.9855	30.2677
EPDR1	Q9UM22	Mammalian ependymin-related protein 1	sp|Q9UM22|EPDR1_HUMAN Mammalian ependymin-related protein 1 OS=Homo sapiens OX=9606 GN=EPDR1 PE=1 SV=2	24.4967	24.8352	25.1919	25.4434	23.5285	23.622	24.5157	23.6417
EPHA4	P54764	Ephrin type-A receptor 4	sp|P54764|EPHA4_HUMAN Ephrin type-A receptor 4 OS=Homo sapiens OX=9606 GN=EPHA4 PE=1 SV=1	25.782	25.9767	26.0139	25.455	26.1296	26.3249	25.8679	25.5582
EPHB2	P29323	Ephrin type-B receptor 2	sp|P29323|EPHB2_HUMAN Ephrin type-B receptor 2 OS=Homo sapiens OX=9606 GN=EPHB2 PE=1 SV=5	23.1016	23.5097	23.4306	23.5549	NA	23.7899	24.2666	23.1884
EPHX1	P07099	Epoxide hydrolase 1	sp|P07099|HYEP_HUMAN Epoxide hydrolase 1 OS=Homo sapiens OX=9606 GN=EPHX1 PE=1 SV=1	25.978	25.2411	25.27	24.7531	26.1503	25.8328	25.6726	25.5414
EPHX2	P34913	Bifunctional epoxide hydrolase 2;Cytosolic epoxide hydrolase 2;Lipid-phosphate phosphatase	sp|P34913|HYES_HUMAN Bifunctional epoxide hydrolase 2 OS=Homo sapiens OX=9606 GN=EPHX2 PE=1 SV=2	23.4322	23.4419	22.9111	23.4752	NA	NA	NA	NA
EPM2AIP1	Q7L775	EPM2A-interacting protein 1	sp|Q7L775|EPMIP_HUMAN EPM2A-interacting protein 1 OS=Homo sapiens OX=9606 GN=EPM2AIP1 PE=1 SV=1	22.9175	22.9071	23.0837	22.2158	23.313	23.7625	23.4144	23.8406
EPN1	Q9Y6I3	Epsin-1	sp|Q9Y6I3|EPN1_HUMAN Epsin-1 OS=Homo sapiens OX=9606 GN=EPN1 PE=1 SV=2	27.7425	27.8401	27.7188	27.7341	26.2631	27.4279	28.0208	26.3377
EPN2	O95208	Epsin-2	sp|O95208|EPN2_HUMAN Epsin-2 OS=Homo sapiens OX=9606 GN=EPN2 PE=1 SV=3	24.0476	24.4055	24.9551	24.8173	NA	23.5126	23.3611	NA
EPRS	P07814	Bifunctional glutamate/proline--tRNA ligase;Glutamate--tRNA ligase;Proline--tRNA ligase	sp|P07814|SYEP_HUMAN Bifunctional glutamate/proline--tRNA ligase OS=Homo sapiens OX=9606 GN=EPRS PE=1 SV=5	27.2738	27.3506	27.5296	27.3349	27.1609	27.5844	27.552	27.0781
EPS15	P42566	Epidermal growth factor receptor substrate 15	sp|P42566|EPS15_HUMAN Epidermal growth factor receptor substrate 15 OS=Homo sapiens OX=9606 GN=EPS15 PE=1 SV=2	23.1851	23.3828	23.9344	24.1728	23.1758	23.1178	22.6567	NA
EPS15L1	Q9UBC2	Epidermal growth factor receptor substrate 15-like 1	sp|Q9UBC2|EP15R_HUMAN Epidermal growth factor receptor substrate 15-like 1 OS=Homo sapiens OX=9606 GN=EPS15L1 PE=1 SV=1	27.3693	27.4729	27.3307	27.6634	27.6935	27.5639	27.7641	26.7486
ERAP1	Q9NZ08	Endoplasmic reticulum aminopeptidase 1	sp|Q9NZ08|ERAP1_HUMAN Endoplasmic reticulum aminopeptidase 1 OS=Homo sapiens OX=9606 GN=ERAP1 PE=1 SV=3	NA	NA	NA	NA	22.9967	22.6882	NA	NA
ERC1	Q8IUD2	ELKS/Rab6-interacting/CAST family member 1	sp|Q8IUD2|RB6I2_HUMAN ELKS/Rab6-interacting/CAST family member 1 OS=Homo sapiens OX=9606 GN=ERC1 PE=1 SV=1	23.1043	23.4419	23.4635	23.153	24.0528	23.5205	24.2106	23.6038
ERC2	O15083	ERC protein 2	sp|O15083|ERC2_HUMAN ERC protein 2 OS=Homo sapiens OX=9606 GN=ERC2 PE=1 SV=3	26.2965	26.5391	26.9203	26.2643	26.1664	27.6152	27.0936	26.8583
ERLIN1	O75477	Erlin-1	sp|O75477|ERLN1_HUMAN Erlin-1 OS=Homo sapiens OX=9606 GN=ERLIN1 PE=1 SV=2	NA	22.4293	22.5153	22.3604	23.1027	22.8839	NA	NA
ERLIN2	O94905	Erlin-2	sp|O94905|ERLN2_HUMAN Erlin-2 OS=Homo sapiens OX=9606 GN=ERLIN2 PE=1 SV=1	25.6084	25.595	25.6571	25.7719	26.0401	25.7792	26.0298	25.5578
ERMN	Q8TAM6	Ermin	sp|Q8TAM6|ERMIN_HUMAN Ermin OS=Homo sapiens OX=9606 GN=ERMN PE=2 SV=1	23.539	24.4746	24.718	26.7539	NA	22.5207	NA	NA
ERO1L	Q96HE7	ERO1-like protein alpha	sp|Q96HE7|ERO1A_HUMAN ERO1-like protein alpha OS=Homo sapiens OX=9606 GN=ERO1A PE=1 SV=2	24.1316	24.5301	24.4262	25.0191	NA	22.6317	23.5803	NA
ERP29	P30040	Endoplasmic reticulum resident protein 29	sp|P30040|ERP29_HUMAN Endoplasmic reticulum resident protein 29 OS=Homo sapiens OX=9606 GN=ERP29 PE=1 SV=4	25.7466	26.5095	26.4056	26.431	25.6105	24.4932	25.3438	24.5888
ERP44	Q9BS26	Endoplasmic reticulum resident protein 44	sp|Q9BS26|ERP44_HUMAN Endoplasmic reticulum resident protein 44 OS=Homo sapiens OX=9606 GN=ERP44 PE=1 SV=1	24.5318	24.8229	24.6302	24.619	25.3177	25.1512	25.1106	24.3092
ESD	P10768	S-formylglutathione hydrolase	sp|P10768|ESTD_HUMAN S-formylglutathione hydrolase OS=Homo sapiens OX=9606 GN=ESD PE=1 SV=2	NA	NA	NA	NA	NA	NA	23.1612	NA
ESYT1	Q9BSJ8	Extended synaptotagmin-1	sp|Q9BSJ8|ESYT1_HUMAN Extended synaptotagmin-1 OS=Homo sapiens OX=9606 GN=ESYT1 PE=1 SV=1	25.9767	26.0399	26.1703	26.1834	26.4304	25.6998	26.0627	25.6509
ESYT2	A0FGR8	Extended synaptotagmin-2	sp|A0FGR8|ESYT2_HUMAN Extended synaptotagmin-2 OS=Homo sapiens OX=9606 GN=ESYT2 PE=1 SV=1	24.0664	24.2194	24.2621	24.6354	24.406	24.3079	23.9422	23.8328
ETF1	P62495	Eukaryotic peptide chain release factor subunit 1	sp|P62495|ERF1_HUMAN Eukaryotic peptide chain release factor subunit 1 OS=Homo sapiens OX=9606 GN=ETF1 PE=1 SV=3	24.1859	24.6743	24.8237	24.6496	23.5572	23.5595	25.0816	22.837
ETFA	P13804	Electron transfer flavoprotein subunit alpha, mitochondrial	sp|P13804|ETFA_HUMAN Electron transfer flavoprotein subunit alpha, mitochondrial OS=Homo sapiens OX=9606 GN=ETFA PE=1 SV=1	28.1261	28.242	28.163	28.2809	26.7282	26.6506	27.177	26.4186
ETFB	P38117	Electron transfer flavoprotein subunit beta	sp|P38117|ETFB_HUMAN Electron transfer flavoprotein subunit beta OS=Homo sapiens OX=9606 GN=ETFB PE=1 SV=3	26.1598	27.2064	26.6729	27.0786	NA	24.3081	24.687	NA
ETFDH	Q16134	Electron transfer flavoprotein-ubiquinone oxidoreductase, mitochondrial	sp|Q16134|ETFD_HUMAN Electron transfer flavoprotein-ubiquinone oxidoreductase, mitochondrial OS=Homo sapiens OX=9606 GN=ETFDH PE=1 SV=2	24.7204	24.6916	24.7209	24.4888	24.327	24.5086	24.7144	24.4519
EVI5L	Q96CN4	EVI5-like protein	sp|Q96CN4|EVI5L_HUMAN EVI5-like protein OS=Homo sapiens OX=9606 GN=EVI5L PE=1 SV=1	NA	NA	NA	NA	NA	22.6878	NA	NA
EVL	Q9UI08	Ena/VASP-like protein	sp|Q9UI08|EVL_HUMAN Ena/VASP-like protein OS=Homo sapiens OX=9606 GN=EVL PE=1 SV=2	23.9585	23.8913	24.1415	23.5934	NA	23.8047	23.4438	NA
EWSR1	Q01844	RNA-binding protein EWS	sp|Q01844|EWS_HUMAN RNA-binding protein EWS OS=Homo sapiens OX=9606 GN=EWSR1 PE=1 SV=1	NA	NA	NA	NA	NA	NA	22.6413	NA
EXD2	Q9NVH0	Exonuclease 3-5 domain-containing protein 2	sp|Q9NVH0|EXD2_HUMAN Exonuclease 3-5 domain-containing protein 2 OS=Homo sapiens OX=9606 GN=EXD2 PE=1 SV=2	21.5571	NA	NA	NA	22.5342	21.8613	22.3621	NA
EXOC1	Q9NV70	Exocyst complex component 1	sp|Q9NV70|EXOC1_HUMAN Exocyst complex component 1 OS=Homo sapiens OX=9606 GN=EXOC1 PE=1 SV=4	24.1895	24.3337	24.4528	24.2336	24.2896	24.7414	24.5009	24.4483
EXOC2	Q96KP1	Exocyst complex component 2	sp|Q96KP1|EXOC2_HUMAN Exocyst complex component 2 OS=Homo sapiens OX=9606 GN=EXOC2 PE=1 SV=1	25.1607	25.6234	25.7977	25.3358	25.3196	25.8873	25.3989	24.8765
EXOC3	O60645	Exocyst complex component 3	sp|O60645|EXOC3_HUMAN Exocyst complex component 3 OS=Homo sapiens OX=9606 GN=EXOC3 PE=1 SV=3	24.6515	24.7896	24.9374	24.4382	24.8869	25.2942	25.4837	24.6249
EXOC4	Q96A65	Exocyst complex component 4	sp|Q96A65|EXOC4_HUMAN Exocyst complex component 4 OS=Homo sapiens OX=9606 GN=EXOC4 PE=1 SV=1	25.3063	25.5806	25.7558	25.266	25.8989	26.1281	25.0652	25.6353
EXOC5	O00471	Exocyst complex component 5	sp|O00471|EXOC5_HUMAN Exocyst complex component 5 OS=Homo sapiens OX=9606 GN=EXOC5 PE=1 SV=1	23.3611	23.8685	23.7624	23.4535	24.0585	24.0158	24.1469	23.5291
EXOC6B	Q9Y2D4	Exocyst complex component 6B	sp|Q9Y2D4|EXC6B_HUMAN Exocyst complex component 6B OS=Homo sapiens OX=9606 GN=EXOC6B PE=1 SV=3	23.308	23.2266	23.3653	23.2438	23.6098	23.2324	23.6749	23.425
EXOC7	Q9UPT5	Exocyst complex component 7	sp|Q9UPT5|EXOC7_HUMAN Exocyst complex component 7 OS=Homo sapiens OX=9606 GN=EXOC7 PE=1 SV=3	25.8401	25.9715	26.0658	25.9938	26.1786	26.5287	26.552	26.2362
EXOC8	Q8IYI6	Exocyst complex component 8	sp|Q8IYI6|EXOC8_HUMAN Exocyst complex component 8 OS=Homo sapiens OX=9606 GN=EXOC8 PE=1 SV=2	24.605	24.3819	24.5886	24.4151	24.9888	25.0328	25.0556	24.6368
EXOG	Q9Y2C4	Nuclease EXOG, mitochondrial	sp|Q9Y2C4|EXOG_HUMAN Nuclease EXOG, mitochondrial OS=Homo sapiens OX=9606 GN=EXOG PE=1 SV=2	24.1855	24.1132	24.1962	23.3214	24.5273	23.8859	23.852	24.9664
EZR	P15311	Ezrin	sp|P15311|EZRI_HUMAN Ezrin OS=Homo sapiens OX=9606 GN=EZR PE=1 SV=4	26.983	26.862	26.5895	26.9863	24.1122	23.6482	24.9989	24.4253
F13A1	P00488	Coagulation factor XIII A chain	sp|P00488|F13A_HUMAN Coagulation factor XIII A chain OS=Homo sapiens OX=9606 GN=F13A1 PE=1 SV=4	NA	NA	NA	NA	NA	22.1991	NA	NA
F3	P13726	Tissue factor	sp|P13726|TF_HUMAN Tissue factor OS=Homo sapiens OX=9606 GN=F3 PE=1 SV=1	NA	23.4387	NA	NA	NA	NA	22.1981	22.6752
F8A1	P23610	Factor VIII intron 22 protein	sp|P23610|F8I2_HUMAN Factor VIII intron 22 protein OS=Homo sapiens OX=9606 GN=F8A1 PE=1 SV=2	23.5746	23.6753	23.5659	23.1365	23.5295	23.5942	NA	24.1053
FABP3	P05413	Fatty acid-binding protein, heart	sp|P05413|FABPH_HUMAN Fatty acid-binding protein, heart OS=Homo sapiens OX=9606 GN=FABP3 PE=1 SV=4	27.8344	27.966	28.2862	28.0037	26.0456	26.6132	27.1262	25.1878
FABP5	Q01469	Fatty acid-binding protein, epidermal	sp|Q01469|FABP5_HUMAN Fatty acid-binding protein 5 OS=Homo sapiens OX=9606 GN=FABP5 PE=1 SV=3	23.6404	24.5349	23.5164	25.6567	22.3446	22.4369	23.6014	24.1974
FABP7	O15540	Fatty acid-binding protein, brain	sp|O15540|FABP7_HUMAN Fatty acid-binding protein, brain OS=Homo sapiens OX=9606 GN=FABP7 PE=1 SV=3	28.0411	27.6245	27.5102	27.4144	26.6468	26.8309	27.65	26.8868
FAF1	Q9UNN5	FAS-associated factor 1	sp|Q9UNN5|FAF1_HUMAN FAS-associated factor 1 OS=Homo sapiens OX=9606 GN=FAF1 PE=1 SV=2	23.011	23.4268	23.3798	23.5104	NA	23.1262	22.5409	NA
FAF2	Q96CS3	FAS-associated factor 2	sp|Q96CS3|FAF2_HUMAN FAS-associated factor 2 OS=Homo sapiens OX=9606 GN=FAF2 PE=1 SV=2	25.0198	25.1967	25.063	25.035	25.5773	25.6515	25.4757	24.8686
FAH	P16930	Fumarylacetoacetase	sp|P16930|FAAA_HUMAN Fumarylacetoacetase OS=Homo sapiens OX=9606 GN=FAH PE=1 SV=2	NA	NA	21.9503	22.3292	NA	NA	NA	NA
FAHD1	Q6P587	Acylpyruvase FAHD1, mitochondrial	sp|Q6P587|FAHD1_HUMAN Acylpyruvase FAHD1, mitochondrial OS=Homo sapiens OX=9606 GN=FAHD1 PE=1 SV=2	23.8688	23.2428	NA	23.9881	NA	NA	NA	NA
FAHD2A	Q96GK7	Fumarylacetoacetate hydrolase domain-containing protein 2A;Fumarylacetoacetate hydrolase domain-containing protein 2B	sp|Q96GK7|FAH2A_HUMAN Fumarylacetoacetate hydrolase domain-containing protein 2A OS=Homo sapiens OX=9606 GN=FAHD2A PE=1 SV=1;sp|Q6P2I3|FAH2B_HUMAN Fumarylacetoacetate hydrolase domain-containing protein 2B OS=Homo sapiens OX=9606 GN=FAHD2B PE=1 SV=1	NA	NA	NA	22.6328	NA	NA	NA	NA
FAIM2	Q9BWQ8	Protein lifeguard 2	sp|Q9BWQ8|LFG2_HUMAN Protein lifeguard 2 OS=Homo sapiens OX=9606 GN=FAIM2 PE=1 SV=1	23.8252	23.8434	24.197	24.0206	NA	23.4392	NA	NA
FAM114A2	Q9NRY5	Protein FAM114A2	sp|Q9NRY5|F1142_HUMAN Protein FAM114A2 OS=Homo sapiens OX=9606 GN=FAM114A2 PE=1 SV=4	NA	23.5163	NA	NA	NA	23.1887	23.8554	NA
FAM120A	Q9NZB2	Constitutive coactivator of PPAR-gamma-like protein 1	sp|Q9NZB2|F120A_HUMAN Constitutive coactivator of PPAR-gamma-like protein 1 OS=Homo sapiens OX=9606 GN=FAM120A PE=1 SV=2	24.5459	24.9321	25.0974	24.4336	24.4256	24.64	24.4896	23.5962
FAM126B	Q8IXS8	Protein FAM126B	sp|Q8IXS8|F126B_HUMAN Protein FAM126B OS=Homo sapiens OX=9606 GN=FAM126B PE=1 SV=1	25.3374	24.6879	24.6686	24.3962	24.1042	24.5444	25.5569	24.229
FAM127A	A6ZKI3	Protein FAM127A	sp|A6ZKI3|RTL8C_HUMAN Retrotransposon Gag-like protein 8C OS=Homo sapiens OX=9606 GN=RTL8C PE=1 SV=1	23.8214	23.1752	23.2297	23.2646	22.5719	22.8122	NA	23.5114
FAM129A	Q9BZQ8	Protein Niban	sp|Q9BZQ8|NIBA1_HUMAN Protein Niban 1 OS=Homo sapiens OX=9606 GN=NIBAN1 PE=1 SV=1	NA	NA	NA	NA	24.0546	NA	23.4292	NA
FAM129B	Q96TA1	Niban-like protein 1	sp|Q96TA1|NIBA2_HUMAN Protein Niban 2 OS=Homo sapiens OX=9606 GN=NIBAN2 PE=1 SV=3	24.0482	22.833	24.4161	23.9966	NA	24.4383	NA	NA
FAM131B	Q86XD5	Protein FAM131B	sp|Q86XD5|F131B_HUMAN Protein FAM131B OS=Homo sapiens OX=9606 GN=FAM131B PE=1 SV=3	23.6758	24.0976	24.0286	23.9842	23.9389	23.9711	24.2134	24.9437
FAM134A	Q8NC44	Protein FAM134A	sp|Q8NC44|RETR2_HUMAN Reticulophagy regulator 2 OS=Homo sapiens OX=9606 GN=RETREG2 PE=1 SV=3	NA	23.952	23.7443	24.308	24.622	23.8114	24.4573	24.0634
FAM134C	Q86VR2	Protein FAM134C	sp|Q86VR2|RETR3_HUMAN Reticulophagy regulator 3 OS=Homo sapiens OX=9606 GN=RETREG3 PE=1 SV=1	NA	NA	NA	NA	23.6022	NA	NA	NA
FAM136A	Q96C01	Protein FAM136A	sp|Q96C01|F136A_HUMAN Protein FAM136A OS=Homo sapiens OX=9606 GN=FAM136A PE=1 SV=1	NA	25.3447	26.2322	25.0343	NA	NA	25.1346	NA
FAM162A	Q96A26	Protein FAM162A	sp|Q96A26|F162A_HUMAN Protein FAM162A OS=Homo sapiens OX=9606 GN=FAM162A PE=1 SV=2	26.2552	26.2292	26.2686	26.3672	26.2143	26.07	26.0414	26.0732
FAM169A	Q9Y6X4	Soluble lamin-associated protein of 75 kDa	sp|Q9Y6X4|F169A_HUMAN Soluble lamin-associated protein of 75 kDa OS=Homo sapiens OX=9606 GN=FAM169A PE=1 SV=2	24.3346	24.2386	24.354	25.5535	23.4004	24.2901	NA	NA
FAM171A2	A8MVW0	Protein FAM171A2	sp|A8MVW0|F1712_HUMAN Protein FAM171A2 OS=Homo sapiens OX=9606 GN=FAM171A2 PE=1 SV=1	NA	NA	22.2026	NA	NA	22.0447	NA	NA
FAM171B	Q6P995	Protein FAM171B	sp|Q6P995|F171B_HUMAN Protein FAM171B OS=Homo sapiens OX=9606 GN=FAM171B PE=2 SV=3	26.7724	26.7326	26.6894	26.4938	24.6504	26.4506	26.4151	26.3573
FAM175B	Q15018	BRISC complex subunit Abro1	sp|Q15018|ABRX2_HUMAN BRISC complex subunit Abraxas 2 OS=Homo sapiens OX=9606 GN=ABRAXAS2 PE=1 SV=2	23.1754	23.2096	23.0534	23.3724	NA	NA	NA	NA
FAM177A1	Q8N128	Protein FAM177A1	sp|Q8N128|F177A_HUMAN Protein FAM177A1 OS=Homo sapiens OX=9606 GN=FAM177A1 PE=1 SV=1	23.5512	23.8497	23.3635	23.7795	24.6904	23.1271	26.1521	NA
FAM213A	Q9BRX8	Redox-regulatory protein FAM213A	sp|Q9BRX8|PXL2A_HUMAN Peroxiredoxin-like 2A OS=Homo sapiens OX=9606 GN=PRXL2A PE=1 SV=3	27.1909	27.0588	26.9727	26.9205	27.0772	26.7323	26.5966	25.8722
FAM213B	Q8TBF2	Prostamide/prostaglandin F synthase	sp|Q8TBF2|PXL2B_HUMAN Prostamide/prostaglandin F synthase OS=Homo sapiens OX=9606 GN=PRXL2B PE=1 SV=1	22.2261	22.393	22.2486	22.1037	NA	22.1166	NA	NA
FAM45A	Q8TCE6	Protein FAM45A;Protein FAM45B	sp|Q8TCE6|FA45A_HUMAN Protein FAM45A OS=Homo sapiens OX=9606 GN=FAM45A PE=2 SV=1;sp|Q6NSW5|FA45B_HUMAN Putative protein FAM45B OS=Homo sapiens OX=9606 GN=FAM45BP PE=5 SV=1	NA	NA	23.2228	23.2169	NA	NA	NA	NA
FAM49A	Q9H0Q0	Protein FAM49A	sp|Q9H0Q0|FA49A_HUMAN Protein FAM49A OS=Homo sapiens OX=9606 GN=FAM49A PE=2 SV=1	24.3503	24.4937	24.4594	24.7981	23.7847	24.3196	25.0612	24.3926
FAM49B	Q9NUQ9	Protein FAM49B	sp|Q9NUQ9|FA49B_HUMAN Protein FAM49B OS=Homo sapiens OX=9606 GN=FAM49B PE=1 SV=1	25.743	25.8956	26.008	26.408	24.6099	25.3176	26.5237	24.3251
FAM63A	Q8N5J2	Protein FAM63A	sp|Q8N5J2|MINY1_HUMAN Ubiquitin carboxyl-terminal hydrolase MINDY-1 OS=Homo sapiens OX=9606 GN=MINDY1 PE=1 SV=2	NA	NA	NA	23.6469	NA	NA	NA	NA
FAM65A	Q6ZS17	Protein FAM65A	sp|Q6ZS17|RIPR1_HUMAN Rho family-interacting cell polarization regulator 1 OS=Homo sapiens OX=9606 GN=RIPOR1 PE=1 SV=1	22.1635	22.2271	21.887	22.289	22.554	NA	NA	NA
FAM81A	Q8TBF8	Protein FAM81A	sp|Q8TBF8|FA81A_HUMAN Protein FAM81A OS=Homo sapiens OX=9606 GN=FAM81A PE=2 SV=3	24.3918	23.9654	23.5964	24.2127	24.2505	24.3552	23.6814	25.3979
FAM96B	Q9Y3D0	Mitotic spindle-associated MMXD complex subunit MIP18	sp|Q9Y3D0|CIA2B_HUMAN Cytosolic iron-sulfur assembly component 2B OS=Homo sapiens OX=9606 GN=CIAO2B PE=1 SV=1	NA	NA	NA	22.952	23.7438	22.9769	23.1635	24.4423
FAM98A	Q8NCA5	Protein FAM98A	sp|Q8NCA5|FA98A_HUMAN Protein FAM98A OS=Homo sapiens OX=9606 GN=FAM98A PE=1 SV=2	NA	NA	23.0944	23.4373	NA	NA	NA	NA
FAM98B	Q52LJ0	Protein FAM98B	sp|Q52LJ0|FA98B_HUMAN Protein FAM98B OS=Homo sapiens OX=9606 GN=FAM98B PE=1 SV=2	23.8964	24.0553	23.9068	24.4893	NA	23.7067	NA	NA
FARP1	Q9Y4F1	FERM, RhoGEF and pleckstrin domain-containing protein 1	sp|Q9Y4F1|FARP1_HUMAN FERM, ARHGEF and pleckstrin domain-containing protein 1 OS=Homo sapiens OX=9606 GN=FARP1 PE=1 SV=1	26.0801	25.9129	25.961	26.1539	25.8549	26.0664	26.2209	25.905
FARSA	Q9Y285	Phenylalanine--tRNA ligase alpha subunit	sp|Q9Y285|SYFA_HUMAN Phenylalanine--tRNA ligase alpha subunit OS=Homo sapiens OX=9606 GN=FARSA PE=1 SV=3	27.1963	27.3631	27.4947	27.2912	27.2789	28.1721	28.1957	28.0333
FARSB	Q9NSD9	Phenylalanine--tRNA ligase beta subunit	sp|Q9NSD9|SYFB_HUMAN Phenylalanine--tRNA ligase beta subunit OS=Homo sapiens OX=9606 GN=FARSB PE=1 SV=3	27.8871	28.1023	28.109	27.8618	26.913	27.9754	27.5868	26.9441
FASN	P49327	Fatty acid synthase;[Acyl-carrier-protein] S-acetyltransferase;[Acyl-carrier-protein] S-malonyltransferase;3-oxoacyl-[acyl-carrier-protein] synthase;3-oxoacyl-[acyl-carrier-protein] reductase;3-hydroxyacyl-[acyl-carrier-protein] dehydratase;Enoyl-[acyl-carrier-protein] reductase;Oleoyl-[acyl-carrier-protein] hydrolase	#VALUE!	#VALUE!	#VALUE!	#VALUE!	#VALUE!	#VALUE!	#VALUE!	#VALUE!	#VALUE!
FBL	P22087	rRNA 2-O-methyltransferase fibrillarin	sp|P22087|FBRL_HUMAN rRNA 2-O-methyltransferase fibrillarin OS=Homo sapiens OX=9606 GN=FBL PE=1 SV=2	NA	22.9671	22.5917	23.1026	25.0787	24.4549	24.7575	24.6163
FBXL16	Q8N461	F-box/LRR-repeat protein 16	sp|Q8N461|FXL16_HUMAN F-box/LRR-repeat protein 16 OS=Homo sapiens OX=9606 GN=FBXL16 PE=2 SV=2	24.2229	24.512	24.5519	24.7226	NA	24.3236	24.2776	23.5438
FBXL18	Q96ME1	F-box/LRR-repeat protein 18	sp|Q96ME1|FXL18_HUMAN F-box/LRR-repeat protein 18 OS=Homo sapiens OX=9606 GN=FBXL18 PE=1 SV=2	23.561	23.1651	23.1273	22.7401	NA	22.2029	NA	NA
FBXO2	Q9UK22	F-box only protein 2	sp|Q9UK22|FBX2_HUMAN F-box only protein 2 OS=Homo sapiens OX=9606 GN=FBXO2 PE=1 SV=2	25.5729	26.0723	26.2246	26.1296	25.1387	25.1583	25.3849	23.7578
FBXO41	Q8TF61	F-box only protein 41	sp|Q8TF61|FBX41_HUMAN F-box only protein 41 OS=Homo sapiens OX=9606 GN=FBXO41 PE=2 SV=5	24.6217	24.591	24.747	24.0647	24.8928	24.5438	25.2234	25.7562
FCGBP	Q9Y6R7	IgGFc-binding protein	sp|Q9Y6R7|FCGBP_HUMAN IgGFc-binding protein OS=Homo sapiens OX=9606 GN=FCGBP PE=1 SV=3	NA	NA	NA	NA	24.6353	NA	NA	NA
FDFT1	P37268	Squalene synthase	sp|P37268|FDFT_HUMAN Squalene synthase OS=Homo sapiens OX=9606 GN=FDFT1 PE=1 SV=1	NA	NA	NA	20.0425	NA	NA	NA	NA
FDPS	P14324	Farnesyl pyrophosphate synthase	sp|P14324|FPPS_HUMAN Farnesyl pyrophosphate synthase OS=Homo sapiens OX=9606 GN=FDPS PE=1 SV=4	26.3254	25.7025	26.0965	25.7799	25.3394	25.6211	24.7115	24.7882
FDXR	P22570	NADPH:adrenodoxin oxidoreductase, mitochondrial	sp|P22570|ADRO_HUMAN NADPH:adrenodoxin oxidoreductase, mitochondrial OS=Homo sapiens OX=9606 GN=FDXR PE=1 SV=3	24.4057	24.7423	25.3164	25.4593	24.375	23.9223	25.9946	24.3433
FECH	P22830	Ferrochelatase, mitochondrial	sp|P22830|HEMH_HUMAN Ferrochelatase, mitochondrial OS=Homo sapiens OX=9606 GN=FECH PE=1 SV=2	24.3693	24.3887	23.9208	24.0912	NA	NA	NA	NA
FERMT2	Q96AC1	Fermitin family homolog 2	sp|Q96AC1|FERM2_HUMAN Fermitin family homolog 2 OS=Homo sapiens OX=9606 GN=FERMT2 PE=1 SV=1	26.2841	25.6691	25.7373	25.8059	25.7714	24.6981	26.8519	24.5375
FERMT3	Q86UX7	Fermitin family homolog 3	sp|Q86UX7|URP2_HUMAN Fermitin family homolog 3 OS=Homo sapiens OX=9606 GN=FERMT3 PE=1 SV=1	NA	NA	NA	NA	22.5873	NA	NA	NA
FEZ1	Q99689	Fasciculation and elongation protein zeta-1	sp|Q99689|FEZ1_HUMAN Fasciculation and elongation protein zeta-1 OS=Homo sapiens OX=9606 GN=FEZ1 PE=1 SV=1	NA	NA	NA	NA	NA	21.9539	NA	NA
FGA	P02671	Fibrinogen alpha chain;Fibrinopeptide A;Fibrinogen alpha chain	sp|P02671|FIBA_HUMAN Fibrinogen alpha chain OS=Homo sapiens OX=9606 GN=FGA PE=1 SV=2	25.3301	25.0956	21.6633	25.5855	26.4362	26.8389	25.9074	25.2982
FGB	P02675	Fibrinogen beta chain;Fibrinopeptide B;Fibrinogen beta chain	sp|P02675|FIBB_HUMAN Fibrinogen beta chain OS=Homo sapiens OX=9606 GN=FGB PE=1 SV=2	NA	23.8345	NA	24.4552	23.9934	24.6034	NA	NA
FGF1	P05230	Fibroblast growth factor 1	sp|P05230|FGF1_HUMAN Fibroblast growth factor 1 OS=Homo sapiens OX=9606 GN=FGF1 PE=1 SV=1	NA	NA	22.6314	23.5579	24.0031	NA	NA	NA
FGF2	P09038	Fibroblast growth factor 2	sp|P09038|FGF2_HUMAN Fibroblast growth factor 2 OS=Homo sapiens OX=9606 GN=FGF2 PE=1 SV=3	NA	NA	NA	NA	22.526	NA	NA	NA
FGG	P02679	Fibrinogen gamma chain	sp|P02679|FIBG_HUMAN Fibrinogen gamma chain OS=Homo sapiens OX=9606 GN=FGG PE=1 SV=3	25.0083	25.5065	NA	25.451	26.4071	26.7296	25.4968	25.9189
FH	P07954	Fumarate hydratase, mitochondrial	sp|P07954|FUMH_HUMAN Fumarate hydratase, mitochondrial OS=Homo sapiens OX=9606 GN=FH PE=1 SV=3	28.9714	28.8808	28.7444	28.8669	27.3914	27.7824	28.2644	27.2611
FHL1	Q13642	Four and a half LIM domains protein 1	sp|Q13642|FHL1_HUMAN Four and a half LIM domains protein 1 OS=Homo sapiens OX=9606 GN=FHL1 PE=1 SV=4	24.0273	24.5602	24.3286	25.1796	NA	NA	NA	NA
FIBP	O43427	Acidic fibroblast growth factor intracellular-binding protein	sp|O43427|FIBP_HUMAN Acidic fibroblast growth factor intracellular-binding protein OS=Homo sapiens OX=9606 GN=FIBP PE=1 SV=3	24.3301	24.082	24.115	24.2918	23.6443	24.3734	23.1107	23.6837
FIS1	Q9Y3D6	Mitochondrial fission 1 protein	sp|Q9Y3D6|FIS1_HUMAN Mitochondrial fission 1 protein OS=Homo sapiens OX=9606 GN=FIS1 PE=1 SV=2	26.6281	26.3727	26.3639	26.7728	26.6786	26.5445	27.6564	27.0252
FKBP15	Q5T1M5	FK506-binding protein 15	sp|Q5T1M5|FKB15_HUMAN FK506-binding protein 15 OS=Homo sapiens OX=9606 GN=FKBP15 PE=1 SV=2	23.4588	23.0407	23.4951	23.248	24.2169	23.6616	24.1242	23.6834
FKBP1A	P62942	Peptidyl-prolyl cis-trans isomerase FKBP1A	sp|P62942|FKB1A_HUMAN Peptidyl-prolyl cis-trans isomerase FKBP1A OS=Homo sapiens OX=9606 GN=FKBP1A PE=1 SV=2	NA	NA	NA	NA	NA	24.6802	24.6558	24.4827
FKBP2	P26885	Peptidyl-prolyl cis-trans isomerase FKBP2	sp|P26885|FKBP2_HUMAN Peptidyl-prolyl cis-trans isomerase FKBP2 OS=Homo sapiens OX=9606 GN=FKBP2 PE=1 SV=2	23.9712	NA	NA	24.9054	23.422	24.9953	24.9988	22.6958
FKBP3	Q00688	Peptidyl-prolyl cis-trans isomerase FKBP3	sp|Q00688|FKBP3_HUMAN Peptidyl-prolyl cis-trans isomerase FKBP3 OS=Homo sapiens OX=9606 GN=FKBP3 PE=1 SV=1	NA	23.0973	22.6785	NA	NA	23.0744	NA	NA
FKBP4	Q02790	Peptidyl-prolyl cis-trans isomerase FKBP4;Peptidyl-prolyl cis-trans isomerase FKBP4, N-terminally processed	sp|Q02790|FKBP4_HUMAN Peptidyl-prolyl cis-trans isomerase FKBP4 OS=Homo sapiens OX=9606 GN=FKBP4 PE=1 SV=3	27.156	27.2988	27.003	27.8093	27.1675	27.7191	27.8041	24.6524
FKBP5	Q13451	Peptidyl-prolyl cis-trans isomerase FKBP5;Peptidyl-prolyl cis-trans isomerase FKBP5, N-terminally processed	sp|Q13451|FKBP5_HUMAN Peptidyl-prolyl cis-trans isomerase FKBP5 OS=Homo sapiens OX=9606 GN=FKBP5 PE=1 SV=2	NA	NA	NA	NA	23.9359	NA	NA	NA
FKBP8	Q14318	Peptidyl-prolyl cis-trans isomerase FKBP8	sp|Q14318|FKBP8_HUMAN Peptidyl-prolyl cis-trans isomerase FKBP8 OS=Homo sapiens OX=9606 GN=FKBP8 PE=1 SV=2	26.2367	26.0906	25.9179	25.7953	25.7616	25.5941	25.3844	26.8229
FLII	Q13045	Protein flightless-1 homolog	sp|Q13045|FLII_HUMAN Protein flightless-1 homolog OS=Homo sapiens OX=9606 GN=FLII PE=1 SV=2	23.7987	24.1026	24.0155	23.6254	25.6473	24.4855	24.5778	NA
FLNA	P21333	Filamin-A	sp|P21333|FLNA_HUMAN Filamin-A OS=Homo sapiens OX=9606 GN=FLNA PE=1 SV=4	26.3489	26.3823	26.0233	26.7696	27.6322	26.5662	27.3744	25.7456
FLNB	O75369	Filamin-B	sp|O75369|FLNB_HUMAN Filamin-B OS=Homo sapiens OX=9606 GN=FLNB PE=1 SV=2	23.3745	24.104	22.9156	24.6655	23.7459	22.1126	NA	NA
FLNC	Q14315	Filamin-C	sp|Q14315|FLNC_HUMAN Filamin-C OS=Homo sapiens OX=9606 GN=FLNC PE=1 SV=3	21.761	22.846	21.4126	22.361	27.4383	23.0139	25.5573	23.9953
FLOT1	O75955	Flotillin-1	sp|O75955|FLOT1_HUMAN Flotillin-1 OS=Homo sapiens OX=9606 GN=FLOT1 PE=1 SV=3	28.4548	28.5708	28.3374	28.5557	28.4561	28.9179	29.237	29.6638
FLOT2	Q14254	Flotillin-2	sp|Q14254|FLOT2_HUMAN Flotillin-2 OS=Homo sapiens OX=9606 GN=FLOT2 PE=1 SV=2	27.9445	28.169	27.8345	27.8538	27.8132	28.4835	28.4102	29.064
FMN2	Q9NZ56	Formin-2	sp|Q9NZ56|FMN2_HUMAN Formin-2 OS=Homo sapiens OX=9606 GN=FMN2 PE=1 SV=4	24.4015	23.9963	24.4075	24.1358	24.6021	25.0903	25.7244	25.0037
FMNL2	Q96PY5	Formin-like protein 2	sp|Q96PY5|FMNL2_HUMAN Formin-like protein 2 OS=Homo sapiens OX=9606 GN=FMNL2 PE=1 SV=3	25.7763	25.7315	25.9324	26.4763	25.6779	25.4395	25.9582	24.58
FMR1	Q06787	Fragile X mental retardation protein 1	sp|Q06787|FMR1_HUMAN Synaptic functional regulator FMR1 OS=Homo sapiens OX=9606 GN=FMR1 PE=1 SV=1	22.2203	22.0718	NA	22.2446	NA	23.1911	NA	NA
FN1	P02751	Fibronectin;Anastellin;Ugl-Y1;Ugl-Y2;Ugl-Y3	sp|P02751|FINC_HUMAN Fibronectin OS=Homo sapiens OX=9606 GN=FN1 PE=1 SV=4	NA	NA	NA	NA	27.7843	22.9045	21.1821	NA
FN3K	Q9H479	Fructosamine-3-kinase	sp|Q9H479|FN3K_HUMAN Fructosamine-3-kinase OS=Homo sapiens OX=9606 GN=FN3K PE=1 SV=1	26.8207	27.0708	26.6998	27.0835	26.4925	26.8608	26.4688	27.1572
FN3KRP	Q9HA64	Ketosamine-3-kinase	sp|Q9HA64|KT3K_HUMAN Ketosamine-3-kinase OS=Homo sapiens OX=9606 GN=FN3KRP PE=1 SV=2	NA	NA	NA	NA	NA	NA	22.4685	NA
FNBP1	Q96RU3	Formin-binding protein 1	sp|Q96RU3|FNBP1_HUMAN Formin-binding protein 1 OS=Homo sapiens OX=9606 GN=FNBP1 PE=1 SV=2	23.9989	22.993	22.9754	23.3336	NA	NA	NA	NA
FNTA	P49354	Protein farnesyltransferase/geranylgeranyltransferase type-1 subunit alpha	sp|P49354|FNTA_HUMAN Protein farnesyltransferase/geranylgeranyltransferase type-1 subunit alpha OS=Homo sapiens OX=9606 GN=FNTA PE=1 SV=1	NA	NA	NA	23.3589	NA	NA	NA	NA
FNTB	P49356	Protein farnesyltransferase subunit beta	sp|P49356|FNTB_HUMAN Protein farnesyltransferase subunit beta OS=Homo sapiens OX=9606 GN=FNTB PE=1 SV=1	NA	NA	22.8947	23.2075	NA	NA	NA	NA
FOLH1	Q04609	Glutamate carboxypeptidase 2;Putative N-acetylated-alpha-linked acidic dipeptidase	sp|Q04609|FOLH1_HUMAN Glutamate carboxypeptidase 2 OS=Homo sapiens OX=9606 GN=FOLH1 PE=1 SV=1;sp|Q9HBA9|FOH1B_HUMAN Putative N-acetylated-alpha-linked acidic dipeptidase OS=Homo sapiens OX=9606 GN=FOLH1B PE=2 SV=1	22.8672	NA	NA	NA	NA	NA	NA	NA
FSCN1	Q16658	Fascin	sp|Q16658|FSCN1_HUMAN Fascin OS=Homo sapiens OX=9606 GN=FSCN1 PE=1 SV=3	28.6954	29.3247	29.1419	29.4834	27.3296	28.9466	28.5622	27.2651
FSD1	Q9BTV5	Fibronectin type III and SPRY domain-containing protein 1	sp|Q9BTV5|FSD1_HUMAN Fibronectin type III and SPRY domain-containing protein 1 OS=Homo sapiens OX=9606 GN=FSD1 PE=1 SV=1	26.121	26.3824	26.2752	26.098	26.102	26.6678	27.2778	26.0665
FSD1L	Q9BXM9	FSD1-like protein	sp|Q9BXM9|FSD1L_HUMAN FSD1-like protein OS=Homo sapiens OX=9606 GN=FSD1L PE=1 SV=2	25.3086	25.0593	25.1196	24.8475	26.0142	26.0024	26.6995	26.2505
FTH1	P02794	Ferritin heavy chain;Ferritin heavy chain, N-terminally processed	sp|P02794|FRIH_HUMAN Ferritin heavy chain OS=Homo sapiens OX=9606 GN=FTH1 PE=1 SV=2	29.0575	28.8791	28.6953	29.5061	28.1725	27.1341	27.2733	27.7339
FTL	P02792	Ferritin light chain	sp|P02792|FRIL_HUMAN Ferritin light chain OS=Homo sapiens OX=9606 GN=FTL PE=1 SV=2	27.1036	27.4777	26.9891	27.6641	27.9541	26.1196	27.4533	26.7535
FUBP1	Q96AE4	Far upstream element-binding protein 1	sp|Q96AE4|FUBP1_HUMAN Far upstream element-binding protein 1 OS=Homo sapiens OX=9606 GN=FUBP1 PE=1 SV=3	NA	22.7606	23.0982	NA	23.8594	NA	NA	NA
FUBP3	Q96I24	Far upstream element-binding protein 3	sp|Q96I24|FUBP3_HUMAN Far upstream element-binding protein 3 OS=Homo sapiens OX=9606 GN=FUBP3 PE=1 SV=2	22.9618	22.7818	23.2775	23.645	24.0362	23.3176	23.9032	24.5718
FUNDC2	Q9BWH2	FUN14 domain-containing protein 2	sp|Q9BWH2|FUND2_HUMAN FUN14 domain-containing protein 2 OS=Homo sapiens OX=9606 GN=FUNDC2 PE=1 SV=2	25.6503	25.2974	25.1471	25.2199	25.7309	25.3363	25.7737	24.7974
FUS	P35637	RNA-binding protein FUS	sp|P35637|FUS_HUMAN RNA-binding protein FUS OS=Homo sapiens OX=9606 GN=FUS PE=1 SV=1	NA	NA	24.4043	NA	24.2833	24.0362	24.8176	24.5433
FXN	Q16595	Frataxin, mitochondrial;Frataxin intermediate form;Frataxin(56-210);Frataxin(78-210);Frataxin mature form	sp|Q16595|FRDA_HUMAN Frataxin, mitochondrial OS=Homo sapiens OX=9606 GN=FXN PE=1 SV=2	23.8067	24.0701	23.7628	23.5117	NA	23.3668	24.0379	NA
FXR1	P51114	Fragile X mental retardation syndrome-related protein 1	sp|P51114|FXR1_HUMAN Fragile X mental retardation syndrome-related protein 1 OS=Homo sapiens OX=9606 GN=FXR1 PE=1 SV=3	23.8002	23.6364	23.4783	23.6614	23.7554	23.9686	NA	NA
FXR2	P51116	Fragile X mental retardation syndrome-related protein 2	sp|P51116|FXR2_HUMAN Fragile X mental retardation syndrome-related protein 2 OS=Homo sapiens OX=9606 GN=FXR2 PE=1 SV=2	23.493	23.4244	23.366	23.5053	24.6145	23.8879	24.5171	24.66
FXYD6	Q9H0Q3	FXYD domain-containing ion transport regulator 6	sp|Q9H0Q3|FXYD6_HUMAN FXYD domain-containing ion transport regulator 6 OS=Homo sapiens OX=9606 GN=FXYD6 PE=1 SV=1	25.0191	25.0543	25.0427	26.1213	NA	24.7227	24.2522	24.6585
FYN	P06241	Tyrosine-protein kinase Fyn	sp|P06241|FYN_HUMAN Tyrosine-protein kinase Fyn OS=Homo sapiens OX=9606 GN=FYN PE=1 SV=3	23.8032	NA	24.1181	24.2075	24.3774	24.6442	25.118	NA
G3BP1	Q13283	Ras GTPase-activating protein-binding protein 1	sp|Q13283|G3BP1_HUMAN Ras GTPase-activating protein-binding protein 1 OS=Homo sapiens OX=9606 GN=G3BP1 PE=1 SV=1	NA	23.5157	23.897	23.82	25.2938	24.25	25.1704	25.0054
G3BP2	Q9UN86	Ras GTPase-activating protein-binding protein 2	sp|Q9UN86|G3BP2_HUMAN Ras GTPase-activating protein-binding protein 2 OS=Homo sapiens OX=9606 GN=G3BP2 PE=1 SV=2	26.7561	27.0154	26.8478	26.5661	27.6683	26.7712	27.3482	27.0818
G6PD	P11413	Glucose-6-phosphate 1-dehydrogenase	sp|P11413|G6PD_HUMAN Glucose-6-phosphate 1-dehydrogenase OS=Homo sapiens OX=9606 GN=G6PD PE=1 SV=4	26.4018	26.2248	26.1816	26.1907	26.2801	24.9952	26.2964	24.908
GAA	P10253	Lysosomal alpha-glucosidase;76 kDa lysosomal alpha-glucosidase;70 kDa lysosomal alpha-glucosidase	sp|P10253|LYAG_HUMAN Lysosomal alpha-glucosidase OS=Homo sapiens OX=9606 GN=GAA PE=1 SV=4	NA	NA	NA	22.0412	NA	NA	NA	NA
GABARAPL2	P60520	Gamma-aminobutyric acid receptor-associated protein-like 2	sp|P60520|GBRL2_HUMAN Gamma-aminobutyric acid receptor-associated protein-like 2 OS=Homo sapiens OX=9606 GN=GABARAPL2 PE=1 SV=1	24.9449	25.1264	25.2916	25.6425	NA	23.2717	22.6912	23.9471
GABBR1	Q9UBS5	Gamma-aminobutyric acid type B receptor subunit 1	sp|Q9UBS5|GABR1_HUMAN Gamma-aminobutyric acid type B receptor subunit 1 OS=Homo sapiens OX=9606 GN=GABBR1 PE=1 SV=1	25.7201	25.8172	26.0709	25.1116	24.7877	25.0649	24.6129	24.9196
GABBR2	O75899	Gamma-aminobutyric acid type B receptor subunit 2	sp|O75899|GABR2_HUMAN Gamma-aminobutyric acid type B receptor subunit 2 OS=Homo sapiens OX=9606 GN=GABBR2 PE=1 SV=1	25.8772	26.2074	25.9566	25.4765	25.448	26.5982	26.2236	26.325
GABRA1	P14867	Gamma-aminobutyric acid receptor subunit alpha-1	sp|P14867|GBRA1_HUMAN Gamma-aminobutyric acid receptor subunit alpha-1 OS=Homo sapiens OX=9606 GN=GABRA1 PE=1 SV=3	25.4898	25.4176	25.5332	25.2376	24.5424	25.9647	25.7342	24.4965
GABRB2	P47870	Gamma-aminobutyric acid receptor subunit beta-2	sp|P47870|GBRB2_HUMAN Gamma-aminobutyric acid receptor subunit beta-2 OS=Homo sapiens OX=9606 GN=GABRB2 PE=1 SV=2	25.4268	24.9936	25.5159	25.1663	24.2845	26.0851	25.5774	25.7283
GABRB3	P28472	Gamma-aminobutyric acid receptor subunit beta-3	sp|P28472|GBRB3_HUMAN Gamma-aminobutyric acid receptor subunit beta-3 OS=Homo sapiens OX=9606 GN=GABRB3 PE=1 SV=1	23.29	23.3664	23.4202	23.1908	NA	24.0255	NA	23.0627
GABRG2	P18507	Gamma-aminobutyric acid receptor subunit gamma-2;Gamma-aminobutyric acid receptor subunit gamma-1	sp|P18507|GBRG2_HUMAN Gamma-aminobutyric acid receptor subunit gamma-2 OS=Homo sapiens OX=9606 GN=GABRG2 PE=1 SV=2;sp|Q8N1C3|GBRG1_HUMAN Gamma-aminobutyric acid receptor subunit gamma-1 OS=Homo sapiens OX=9606 GN=GABRG1 PE=2 SV=2	23.7617	23.9514	23.8501	23.915	NA	23.5782	NA	NA
GAD1	Q99259	Glutamate decarboxylase 1	sp|Q99259|DCE1_HUMAN Glutamate decarboxylase 1 OS=Homo sapiens OX=9606 GN=GAD1 PE=1 SV=1	23.3265	25.0421	25.1136	24.7841	26.4107	25.8555	25.8195	25.7997
GAD2	Q05329	Glutamate decarboxylase 2	sp|Q05329|DCE2_HUMAN Glutamate decarboxylase 2 OS=Homo sapiens OX=9606 GN=GAD2 PE=1 SV=1	25.1642	25.4924	25.4	24.9242	26.5423	26.0212	25.4406	25.1071
GAK	O14976	Cyclin-G-associated kinase	sp|O14976|GAK_HUMAN Cyclin-G-associated kinase OS=Homo sapiens OX=9606 GN=GAK PE=1 SV=2	23.9691	23.9503	23.856	23.3479	24.0748	24.1151	24.177	24.47
GALC	P54803	Galactocerebrosidase	sp|P54803|GALC_HUMAN Galactocerebrosidase OS=Homo sapiens OX=9606 GN=GALC PE=1 SV=3	21.2382	23.241	NA	NA	NA	NA	NA	NA
GALE	Q14376	UDP-glucose 4-epimerase	sp|Q14376|GALE_HUMAN UDP-glucose 4-epimerase OS=Homo sapiens OX=9606 GN=GALE PE=1 SV=2	NA	NA	NA	NA	NA	22.2243	NA	NA
GALK1	P51570	Galactokinase	sp|P51570|GALK1_HUMAN Galactokinase OS=Homo sapiens OX=9606 GN=GALK1 PE=1 SV=1	24.5904	24.8793	24.8458	25.1479	25.8905	25.1991	25.0068	25.4658
GAMT	Q14353	Guanidinoacetate N-methyltransferase	sp|Q14353|GAMT_HUMAN Guanidinoacetate N-methyltransferase OS=Homo sapiens OX=9606 GN=GAMT PE=1 SV=1	23.1332	23.6549	23.2802	23.3207	NA	22.6634	NA	NA
GANAB	Q14697	Neutral alpha-glucosidase AB	sp|Q14697|GANAB_HUMAN Neutral alpha-glucosidase AB OS=Homo sapiens OX=9606 GN=GANAB PE=1 SV=3	27.1469	27.3844	27.3704	27.3781	26.7936	27.1865	27.1297	26.908
GAP43	P17677	Neuromodulin	sp|P17677|NEUM_HUMAN Neuromodulin OS=Homo sapiens OX=9606 GN=GAP43 PE=1 SV=1	31.4896	31.4862	31.6303	31.8159	30.4593	31.3374	30.9698	30.7562
GAPDH	P04406	Glyceraldehyde-3-phosphate dehydrogenase	sp|P04406|G3P_HUMAN Glyceraldehyde-3-phosphate dehydrogenase OS=Homo sapiens OX=9606 GN=GAPDH PE=1 SV=3	32.0095	32.1116	32.171	32.0628	30.6799	30.2054	31.358	31.3517
GAPVD1	Q14C86	GTPase-activating protein and VPS9 domain-containing protein 1	sp|Q14C86|GAPD1_HUMAN GTPase-activating protein and VPS9 domain-containing protein 1 OS=Homo sapiens OX=9606 GN=GAPVD1 PE=1 SV=2	23.4817	23.8274	23.5258	23.9292	24.4829	23.8648	24.3817	23.8928
GARS	P41250	Glycine--tRNA ligase	sp|P41250|GARS_HUMAN Glycine--tRNA ligase OS=Homo sapiens OX=9606 GN=GARS PE=1 SV=3	27.5585	27.7752	27.8312	28.1628	27.4578	26.3701	27.7656	26.5761
GART	P22102	Trifunctional purine biosynthetic protein adenosine-3;Phosphoribosylamine--glycine ligase;Phosphoribosylformylglycinamidine cyclo-ligase;Phosphoribosylglycinamide formyltransferase	sp|P22102|PUR2_HUMAN Trifunctional purine biosynthetic protein adenosine-3 OS=Homo sapiens OX=9606 GN=GART PE=1 SV=1	23.4305	23.5013	23.9856	23.8495	24.6555	24.008	24.737	24.9014
GAS7	O60861	Growth arrest-specific protein 7	sp|O60861|GAS7_HUMAN Growth arrest-specific protein 7 OS=Homo sapiens OX=9606 GN=GAS7 PE=1 SV=3	26.2226	26.1653	26.13	24.6242	23.7797	26.2594	23.0344	23.4823
GATM	P50440	Glycine amidinotransferase, mitochondrial	sp|P50440|GATM_HUMAN Glycine amidinotransferase, mitochondrial OS=Homo sapiens OX=9606 GN=GATM PE=1 SV=1	23.9449	23.4763	22.5466	23.7979	NA	NA	NA	NA
GBAS	O75323	Protein NipSnap homolog 2	sp|O75323|NIPS2_HUMAN Protein NipSnap homolog 2 OS=Homo sapiens OX=9606 GN=NIPSNAP2 PE=1 SV=1	27.2306	27.4679	27.1195	27.271	NA	25.917	26.5082	26.8697
GBE1	Q04446	1,4-alpha-glucan-branching enzyme	sp|Q04446|GLGB_HUMAN 1,4-alpha-glucan-branching enzyme OS=Homo sapiens OX=9606 GN=GBE1 PE=1 SV=3	24.0548	24.223	24.0194	23.7874	25.1423	24.6714	25.3248	25.0991
GCA	P28676	Grancalcin	sp|P28676|GRAN_HUMAN Grancalcin OS=Homo sapiens OX=9606 GN=GCA PE=1 SV=2	22.8667	23.1374	22.9924	23.4586	NA	NA	NA	NA
GCDH	Q92947	Glutaryl-CoA dehydrogenase, mitochondrial	sp|Q92947|GCDH_HUMAN Glutaryl-CoA dehydrogenase, mitochondrial OS=Homo sapiens OX=9606 GN=GCDH PE=1 SV=1	24.8918	24.3251	24.2195	NA	NA	NA	NA	NA
GCLC	P48506	Glutamate--cysteine ligase catalytic subunit	sp|P48506|GSH1_HUMAN Glutamate--cysteine ligase catalytic subunit OS=Homo sapiens OX=9606 GN=GCLC PE=1 SV=2	24.4994	24.7364	24.6567	24.889	23.7918	24.8339	24.1681	NA
GCLM	P48507	Glutamate--cysteine ligase regulatory subunit	sp|P48507|GSH0_HUMAN Glutamate--cysteine ligase regulatory subunit OS=Homo sapiens OX=9606 GN=GCLM PE=1 SV=1	24.0203	NA	NA	NA	25.202	24.2839	NA	24.7385
GCN1L1	Q92616	Translational activator GCN1	sp|Q92616|GCN1_HUMAN eIF-2-alpha kinase activator GCN1 OS=Homo sapiens OX=9606 GN=GCN1 PE=1 SV=6	21.8479	21.9469	NA	22.2044	23.2994	NA	NA	23.3133
GCSH	P23434	Glycine cleavage system H protein, mitochondrial	sp|P23434|GCSH_HUMAN Glycine cleavage system H protein, mitochondrial OS=Homo sapiens OX=9606 GN=GCSH PE=1 SV=2	NA	NA	NA	23.6936	NA	NA	NA	NA
GDA	Q9Y2T3	Guanine deaminase	sp|Q9Y2T3|GUAD_HUMAN Guanine deaminase OS=Homo sapiens OX=9606 GN=GDA PE=1 SV=1	28.1491	28.4615	27.9921	28.3545	25.1592	26.3558	25.6098	25.5767
GDAP1	Q8TB36	Ganglioside-induced differentiation-associated protein 1	sp|Q8TB36|GDAP1_HUMAN Ganglioside-induced differentiation-associated protein 1 OS=Homo sapiens OX=9606 GN=GDAP1 PE=1 SV=3	28.6803	28.3511	28.1835	28.2628	28.8102	29.0341	28.7327	28.6126
GDI1	P31150	Rab GDP dissociation inhibitor alpha	sp|P31150|GDIA_HUMAN Rab GDP dissociation inhibitor alpha OS=Homo sapiens OX=9606 GN=GDI1 PE=1 SV=2	31.344	31.2408	31.2618	31.4224	29.9596	30.6292	31.4303	29.7346
GDI2	P50395	Rab GDP dissociation inhibitor beta	sp|P50395|GDIB_HUMAN Rab GDP dissociation inhibitor beta OS=Homo sapiens OX=9606 GN=GDI2 PE=1 SV=2	29.0022	29.3285	29.0482	29.4481	27.7487	27.5831	28.6412	27.147
GDPD1	Q8N9F7	Glycerophosphodiester phosphodiesterase domain-containing protein 1	sp|Q8N9F7|GDPD1_HUMAN Lysophospholipase D GDPD1 OS=Homo sapiens OX=9606 GN=GDPD1 PE=1 SV=2	23.1315	23.6769	23.7643	23.9607	23.2388	23.1749	NA	22.9237
GET4	Q7L5D6	Golgi to ER traffic protein 4 homolog	sp|Q7L5D6|GET4_HUMAN Golgi to ER traffic protein 4 homolog OS=Homo sapiens OX=9606 GN=GET4 PE=1 SV=1	23.5534	23.4902	23.4864	23.4352	23.7038	23.4535	NA	24.3301
GFAP	P14136	Glial fibrillary acidic protein	sp|P14136|GFAP_HUMAN Glial fibrillary acidic protein OS=Homo sapiens OX=9606 GN=GFAP PE=1 SV=1	31.2279	32.3452	31.305	32.7638	32.1805	29.9898	32.134	33.0737
GFM1	Q96RP9	Elongation factor G, mitochondrial	sp|Q96RP9|EFGM_HUMAN Elongation factor G, mitochondrial OS=Homo sapiens OX=9606 GN=GFM1 PE=1 SV=2	23.7095	24.9704	24.8672	24.2172	23.8358	23.5636	23.8984	23.2209
GFOD1	Q9NXC2	Glucose-fructose oxidoreductase domain-containing protein 1	sp|Q9NXC2|GFOD1_HUMAN Glucose-fructose oxidoreductase domain-containing protein 1 OS=Homo sapiens OX=9606 GN=GFOD1 PE=1 SV=1	22.9406	23.56	22.9627	22.7293	NA	NA	22.4546	NA
GFPT1	Q06210	Glutamine--fructose-6-phosphate aminotransferase [isomerizing] 1	sp|Q06210|GFPT1_HUMAN Glutamine--fructose-6-phosphate aminotransferase [isomerizing] 1 OS=Homo sapiens OX=9606 GN=GFPT1 PE=1 SV=3	NA	NA	NA	22.3814	24.5789	23.215	NA	22.2987
GFRA2	O00451	GDNF family receptor alpha-2	sp|O00451|GFRA2_HUMAN GDNF family receptor alpha-2 OS=Homo sapiens OX=9606 GN=GFRA2 PE=1 SV=2	NA	NA	NA	NA	NA	NA	21.261	NA
GGA1	Q9UJY5	ADP-ribosylation factor-binding protein GGA1	sp|Q9UJY5|GGA1_HUMAN ADP-ribosylation factor-binding protein GGA1 OS=Homo sapiens OX=9606 GN=GGA1 PE=1 SV=1	22.8718	23.112	23.2105	23.2271	NA	22.8881	23.8606	NA
GGA3	Q9NZ52	ADP-ribosylation factor-binding protein GGA3	sp|Q9NZ52|GGA3_HUMAN ADP-ribosylation factor-binding protein GGA3 OS=Homo sapiens OX=9606 GN=GGA3 PE=1 SV=1	23.8276	23.8565	23.8158	23.6242	23.8972	24.3155	24.3056	NA
GGT7	Q9UJ14	Gamma-glutamyltransferase 7;Gamma-glutamyltransferase 7 heavy chain;Gamma-glutamyltransferase 7 light chain	sp|Q9UJ14|GGT7_HUMAN Glutathione hydrolase 7 OS=Homo sapiens OX=9606 GN=GGT7 PE=1 SV=2	23.6489	23.9261	23.7958	23.5979	24.2824	24.4632	24.6515	24.4565
GHITM	Q9H3K2	Growth hormone-inducible transmembrane protein	sp|Q9H3K2|GHITM_HUMAN Growth hormone-inducible transmembrane protein OS=Homo sapiens OX=9606 GN=GHITM PE=1 SV=2	23.0455	23.3935	23.3811	23.1947	NA	NA	NA	22.343
GID8	Q9NWU2	Glucose-induced degradation protein 8 homolog	sp|Q9NWU2|GID8_HUMAN Glucose-induced degradation protein 8 homolog OS=Homo sapiens OX=9606 GN=GID8 PE=1 SV=1	NA	23.26	23.1208	NA	NA	NA	NA	NA
GIPC1	O14908	PDZ domain-containing protein GIPC1	sp|O14908|GIPC1_HUMAN PDZ domain-containing protein GIPC1 OS=Homo sapiens OX=9606 GN=GIPC1 PE=1 SV=2	23.9351	23.4619	23.7142	24.4617	23.8504	23.4619	22.6744	23.6734
GIT1	Q9Y2X7	ARF GTPase-activating protein GIT1	sp|Q9Y2X7|GIT1_HUMAN ARF GTPase-activating protein GIT1 OS=Homo sapiens OX=9606 GN=GIT1 PE=1 SV=2	26.7069	26.5489	26.5061	25.9061	26.7217	27.106	27.5888	27.436
GIT2	Q14161	ARF GTPase-activating protein GIT2	sp|Q14161|GIT2_HUMAN ARF GTPase-activating protein GIT2 OS=Homo sapiens OX=9606 GN=GIT2 PE=1 SV=2	NA	NA	NA	NA	23.9074	NA	22.2553	NA
GJA1	P17302	Gap junction alpha-1 protein	sp|P17302|CXA1_HUMAN Gap junction alpha-1 protein OS=Homo sapiens OX=9606 GN=GJA1 PE=1 SV=2	25.2408	25.3398	25.4749	23.9989	NA	NA	NA	NA
GK	P32189	Glycerol kinase;Putative glycerol kinase 3	sp|P32189|GLPK_HUMAN Glycerol kinase OS=Homo sapiens OX=9606 GN=GK PE=1 SV=3;sp|Q14409|GLPK3_HUMAN Glycerol kinase 3 OS=Homo sapiens OX=9606 GN=GK3P PE=2 SV=2	24.6149	24.6975	24.6048	24.5006	25.4578	25.2444	24.4749	24.4451
GLIPR2	Q9H4G4	Golgi-associated plant pathogenesis-related protein 1	sp|Q9H4G4|GAPR1_HUMAN Golgi-associated plant pathogenesis-related protein 1 OS=Homo sapiens OX=9606 GN=GLIPR2 PE=1 SV=3	24.9785	25.0421	24.9746	25.7577	25.1228	23.8974	24.682	23.6047
GLMN	Q92990	Glomulin	sp|Q92990|GLMN_HUMAN Glomulin OS=Homo sapiens OX=9606 GN=GLMN PE=1 SV=2	NA	21.8274	21.8036	21.3936	NA	NA	NA	NA
GLO1	Q04760	Lactoylglutathione lyase	sp|Q04760|LGUL_HUMAN Lactoylglutathione lyase OS=Homo sapiens OX=9606 GN=GLO1 PE=1 SV=4	22.9464	23.7394	22.7488	25.2043	23.681	24.1357	24.6102	NA
GLOD4	Q9HC38	Glyoxalase domain-containing protein 4	sp|Q9HC38|GLOD4_HUMAN Glyoxalase domain-containing protein 4 OS=Homo sapiens OX=9606 GN=GLOD4 PE=1 SV=1	26.3927	26.6748	26.4522	27.1749	NA	23.5987	24.7143	25.8451
GLRX3	O76003	Glutaredoxin-3	sp|O76003|GLRX3_HUMAN Glutaredoxin-3 OS=Homo sapiens OX=9606 GN=GLRX3 PE=1 SV=2	24.0913	24.5609	24.0205	24.926	25.4848	24.3116	25.0191	NA
GLRX5	Q86SX6	Glutaredoxin-related protein 5, mitochondrial	sp|Q86SX6|GLRX5_HUMAN Glutaredoxin-related protein 5, mitochondrial OS=Homo sapiens OX=9606 GN=GLRX5 PE=1 SV=2	22.8794	22.6117	22.6826	22.769	22.3251	22.9223	23.2564	NA
GLS	O94925	Glutaminase kidney isoform, mitochondrial	sp|O94925|GLSK_HUMAN Glutaminase kidney isoform, mitochondrial OS=Homo sapiens OX=9606 GN=GLS PE=1 SV=1	29.2637	29.1262	29.1855	29.3117	29.9429	29.6192	29.5505	28.9369
GLTP	Q9NZD2	Glycolipid transfer protein	sp|Q9NZD2|GLTP_HUMAN Glycolipid transfer protein OS=Homo sapiens OX=9606 GN=GLTP PE=1 SV=3	24.9385	25.4458	25.4552	26.1797	23.1371	23.1675	NA	NA
GLUD1	P00367	Glutamate dehydrogenase 1, mitochondrial;Glutamate dehydrogenase 2, mitochondrial	sp|P00367|DHE3_HUMAN Glutamate dehydrogenase 1, mitochondrial OS=Homo sapiens OX=9606 GN=GLUD1 PE=1 SV=2;sp|P49448|DHE4_HUMAN Glutamate dehydrogenase 2, mitochondrial OS=Homo sapiens OX=9606 GN=GLUD2 PE=1 SV=2	31.2309	31.1232	31.2897	31.4555	27.9076	29.5416	29.7425	29.8847
GLUL	P15104	Glutamine synthetase	sp|P15104|GLNA_HUMAN Glutamine synthetase OS=Homo sapiens OX=9606 GN=GLUL PE=1 SV=4	29.0896	29.032	29.8137	28.8452	NA	NA	22.4775	24.6716
GLYR1	Q49A26	Putative oxidoreductase GLYR1	sp|Q49A26|GLYR1_HUMAN Putative oxidoreductase GLYR1 OS=Homo sapiens OX=9606 GN=GLYR1 PE=1 SV=4	NA	22.16	22.5433	22.3538	22.428	22.1676	NA	22.7084
GMFB	P60983	Glia maturation factor beta	sp|P60983|GMFB_HUMAN Glia maturation factor beta OS=Homo sapiens OX=9606 GN=GMFB PE=1 SV=2	27.0344	26.4513	26.9553	27.1634	25.1383	25.8814	27.3301	26.3509
GMPPA	Q96IJ6	Mannose-1-phosphate guanyltransferase alpha	sp|Q96IJ6|GMPPA_HUMAN Mannose-1-phosphate guanyltransferase alpha OS=Homo sapiens OX=9606 GN=GMPPA PE=1 SV=1	22.1162	22.5026	22.5262	22.9836	NA	NA	NA	NA
GMPR2	Q9P2T1	GMP reductase 2	sp|Q9P2T1|GMPR2_HUMAN GMP reductase 2 OS=Homo sapiens OX=9606 GN=GMPR2 PE=1 SV=1	NA	NA	23.7865	23.9721	NA	NA	NA	NA
GNA11	P29992	Guanine nucleotide-binding protein subunit alpha-11	sp|P29992|GNA11_HUMAN Guanine nucleotide-binding protein subunit alpha-11 OS=Homo sapiens OX=9606 GN=GNA11 PE=1 SV=2	25.4799	25.595	25.147	25.467	26.2666	26.2081	26.3346	27.2736
GNA13	Q14344	Guanine nucleotide-binding protein subunit alpha-13	sp|Q14344|GNA13_HUMAN Guanine nucleotide-binding protein subunit alpha-13 OS=Homo sapiens OX=9606 GN=GNA13 PE=1 SV=2	24.8744	25.2834	25.2736	25.5273	25.1811	24.0539	24.2588	25.3148
GNAI1	P63096	Guanine nucleotide-binding protein G(i) subunit alpha-1	sp|P63096|GNAI1_HUMAN Guanine nucleotide-binding protein G(i) subunit alpha-1 OS=Homo sapiens OX=9606 GN=GNAI1 PE=1 SV=2	28.4284	28.5091	28.5414	28.7889	28.2441	28.5838	28.6708	28.1995
GNAI2	P04899	Guanine nucleotide-binding protein G(i) subunit alpha-2	sp|P04899|GNAI2_HUMAN Guanine nucleotide-binding protein G(i) subunit alpha-2 OS=Homo sapiens OX=9606 GN=GNAI2 PE=1 SV=3	28.2654	28.2048	28.2069	28.0147	28.5042	28.2535	27.9307	28.4998
GNAI3	P08754	Guanine nucleotide-binding protein G(k) subunit alpha	sp|P08754|GNAI3_HUMAN Guanine nucleotide-binding protein G(i) subunit alpha OS=Homo sapiens OX=9606 GN=GNAI3 PE=1 SV=3	24.0599	24.478	24.3953	24.6177	24.1835	23.9514	24.234	NA
GNAO1	P09471	Guanine nucleotide-binding protein G(o) subunit alpha	sp|P09471|GNAO_HUMAN Guanine nucleotide-binding protein G(o) subunit alpha OS=Homo sapiens OX=9606 GN=GNAO1 PE=1 SV=4	32.0004	31.9435	32.028	32.2122	31.9605	32.2341	32.3057	32.6196
GNAQ	P50148	Guanine nucleotide-binding protein G(q) subunit alpha	sp|P50148|GNAQ_HUMAN Guanine nucleotide-binding protein G(q) subunit alpha OS=Homo sapiens OX=9606 GN=GNAQ PE=1 SV=4	27.0817	27.1163	27.1611	27.0981	27.3249	27.1687	27.1208	27.6039
GNAS	Q5JWF2	Guanine nucleotide-binding protein G(s) subunit alpha isoforms XLas;Guanine nucleotide-binding protein G(s) subunit alpha isoforms short	sp|Q5JWF2|GNAS1_HUMAN Guanine nucleotide-binding protein G(s) subunit alpha isoforms XLas OS=Homo sapiens OX=9606 GN=GNAS PE=1 SV=2;sp|P63092|GNAS2_HUMAN Guanine nucleotide-binding protein G(s) subunit alpha isoforms short OS=Homo sapiens OX=9606 GN=GNAS P	27.2056	27.3581	27.2417	27.5743	27.2129	27.5678	27.4875	27.9767
GNAZ	P19086	Guanine nucleotide-binding protein G(z) subunit alpha	sp|P19086|GNAZ_HUMAN Guanine nucleotide-binding protein G(z) subunit alpha OS=Homo sapiens OX=9606 GN=GNAZ PE=1 SV=3	26.7828	26.9661	27.0072	27.0053	26.7455	27.4953	27.1113	27.1883
GNB1	P62873	Guanine nucleotide-binding protein G(I)/G(S)/G(T) subunit beta-1	sp|P62873|GBB1_HUMAN Guanine nucleotide-binding protein G(I)/G(S)/G(T) subunit beta-1 OS=Homo sapiens OX=9606 GN=GNB1 PE=1 SV=3	31.1978	31.3364	31.1519	31.6485	30.7794	30.973	31.101	31.6985
GNB2	P62879	Guanine nucleotide-binding protein G(I)/G(S)/G(T) subunit beta-2	sp|P62879|GBB2_HUMAN Guanine nucleotide-binding protein G(I)/G(S)/G(T) subunit beta-2 OS=Homo sapiens OX=9606 GN=GNB2 PE=1 SV=3	28.9979	28.8834	29.3594	29.5484	28.7731	29.0073	27.7775	28.9667
GNB2L1	P63244	Guanine nucleotide-binding protein subunit beta-2-like 1;Guanine nucleotide-binding protein subunit beta-2-like 1, N-terminally processed	sp|P63244|RACK1_HUMAN Receptor of activated protein C kinase 1 OS=Homo sapiens OX=9606 GN=RACK1 PE=1 SV=3	25.8687	26.0862	25.8233	25.6885	24.7302	24.8065	25.3718	25.1117
GNB4	Q9HAV0	Guanine nucleotide-binding protein subunit beta-4	sp|Q9HAV0|GBB4_HUMAN Guanine nucleotide-binding protein subunit beta-4 OS=Homo sapiens OX=9606 GN=GNB4 PE=1 SV=3	25.9496	25.8424	26.3103	25.6794	NA	26.4453	26.6547	27.0626
GNB5	O14775	Guanine nucleotide-binding protein subunit beta-5	sp|O14775|GNB5_HUMAN Guanine nucleotide-binding protein subunit beta-5 OS=Homo sapiens OX=9606 GN=GNB5 PE=1 SV=2	24.5349	24.4209	NA	24.6931	24.5238	24.9641	25.2332	23.9845
GNG10	P50151	Guanine nucleotide-binding protein G(I)/G(S)/G(O) subunit gamma-10	sp|P50151|GBG10_HUMAN Guanine nucleotide-binding protein G(I)/G(S)/G(O) subunit gamma-10 OS=Homo sapiens OX=9606 GN=GNG10 PE=1 SV=1	24.969	24.7839	24.311	24.8073	25.4719	24.3554	22.8114	26.5547
GNG12	Q9UBI6	Guanine nucleotide-binding protein G(I)/G(S)/G(O) subunit gamma-12	sp|Q9UBI6|GBG12_HUMAN Guanine nucleotide-binding protein G(I)/G(S)/G(O) subunit gamma-12 OS=Homo sapiens OX=9606 GN=GNG12 PE=1 SV=3	26.1429	25.8727	25.8527	25.9517	25.5785	25.7377	22.2769	26.45
GNG13	Q9P2W3	Guanine nucleotide-binding protein G(I)/G(S)/G(O) subunit gamma-13	sp|Q9P2W3|GBG13_HUMAN Guanine nucleotide-binding protein G(I)/G(S)/G(O) subunit gamma-13 OS=Homo sapiens OX=9606 GN=GNG13 PE=3 SV=1	22.2206	22.8003	22.384	23.4174	NA	NA	NA	NA
GNG2	P59768	Guanine nucleotide-binding protein G(I)/G(S)/G(O) subunit gamma-2	sp|P59768|GBG2_HUMAN Guanine nucleotide-binding protein G(I)/G(S)/G(O) subunit gamma-2 OS=Homo sapiens OX=9606 GN=GNG2 PE=1 SV=2	27.1209	26.2282	26.5099	27.0717	27.4453	27.0057	26.6321	27.929
GNG3	P63215	Guanine nucleotide-binding protein G(I)/G(S)/G(O) subunit gamma-3	sp|P63215|GBG3_HUMAN Guanine nucleotide-binding protein G(I)/G(S)/G(O) subunit gamma-3 OS=Homo sapiens OX=9606 GN=GNG3 PE=1 SV=1	25.8817	25.6591	25.6471	25.3293	26.162	26.8424	25.7966	27.7093
GNG5	P63218	Guanine nucleotide-binding protein G(I)/G(S)/G(O) subunit gamma-5	sp|P63218|GBG5_HUMAN Guanine nucleotide-binding protein G(I)/G(S)/G(O) subunit gamma-5 OS=Homo sapiens OX=9606 GN=GNG5 PE=1 SV=3	24.783	24.1035	24.1902	24.309	23.4985	NA	NA	23.6597
GNG7	O60262	Guanine nucleotide-binding protein G(I)/G(S)/G(O) subunit gamma-7	sp|O60262|GBG7_HUMAN Guanine nucleotide-binding protein G(I)/G(S)/G(O) subunit gamma-7 OS=Homo sapiens OX=9606 GN=GNG7 PE=1 SV=1	26.9738	27.2979	27.7612	27.1944	26.5132	26.8825	26.9949	26.8629
GNL1	P36915	Guanine nucleotide-binding protein-like 1	sp|P36915|GNL1_HUMAN Guanine nucleotide-binding protein-like 1 OS=Homo sapiens OX=9606 GN=GNL1 PE=1 SV=2	25.647	25.5686	25.6276	25.8512	26.3868	26.1898	25.7568	25.7231
GNPDA1	P46926	Glucosamine-6-phosphate isomerase 1	sp|P46926|GNPI1_HUMAN Glucosamine-6-phosphate isomerase 1 OS=Homo sapiens OX=9606 GN=GNPDA1 PE=1 SV=1	23.595	NA	23.4767	24.0951	NA	NA	NA	22.8909
GNPDA2	Q8TDQ7	Glucosamine-6-phosphate isomerase 2	sp|Q8TDQ7|GNPI2_HUMAN Glucosamine-6-phosphate isomerase 2 OS=Homo sapiens OX=9606 GN=GNPDA2 PE=1 SV=1	NA	NA	22.0461	22.1555	NA	NA	NA	NA
GOLGA2	Q08379	Golgin subfamily A member 2	sp|Q08379|GOGA2_HUMAN Golgin subfamily A member 2 OS=Homo sapiens OX=9606 GN=GOLGA2 PE=1 SV=3	NA	22.9572	NA	22.7481	25.5075	NA	23.4961	NA
GOLGA3	Q08378	Golgin subfamily A member 3	sp|Q08378|GOGA3_HUMAN Golgin subfamily A member 3 OS=Homo sapiens OX=9606 GN=GOLGA3 PE=1 SV=2	23.2918	23.567	23.8153	23.3261	23.4865	24.1005	23.7088	23.3303
GOLGA7	Q7Z5G4	Golgin subfamily A member 7	sp|Q7Z5G4|GOGA7_HUMAN Golgin subfamily A member 7 OS=Homo sapiens OX=9606 GN=GOLGA7 PE=1 SV=2	22.2049	22.677	22.821	22.5699	23.4615	22.1683	22.9154	NA
GOLM1	Q8NBJ4	Golgi membrane protein 1	sp|Q8NBJ4|GOLM1_HUMAN Golgi membrane protein 1 OS=Homo sapiens OX=9606 GN=GOLM1 PE=1 SV=1	NA	NA	NA	NA	22.3467	NA	NA	NA
GORASP2	Q9H8Y8	Golgi reassembly-stacking protein 2	sp|Q9H8Y8|GORS2_HUMAN Golgi reassembly-stacking protein 2 OS=Homo sapiens OX=9606 GN=GORASP2 PE=1 SV=3	NA	23.585	23.8655	24.2358	24.495	24.5831	24.4083	NA
GOT1	P17174	Aspartate aminotransferase, cytoplasmic	sp|P17174|AATC_HUMAN Aspartate aminotransferase, cytoplasmic OS=Homo sapiens OX=9606 GN=GOT1 PE=1 SV=3	30.941	30.934	30.7999	30.712	29.9873	30.2959	31.466	29.7891
GOT2	P00505	Aspartate aminotransferase, mitochondrial	sp|P00505|AATM_HUMAN Aspartate aminotransferase, mitochondrial OS=Homo sapiens OX=9606 GN=GOT2 PE=1 SV=3	31.8454	31.6413	31.6662	31.5024	32.0146	31.8837	31.7429	31.6984
GPC1	P35052	Glypican-1;Secreted glypican-1	sp|P35052|GPC1_HUMAN Glypican-1 OS=Homo sapiens OX=9606 GN=GPC1 PE=1 SV=2	24.2575	24.193	24.0062	23.9447	24.6787	24.2785	24.6786	24.0341
GPC4	O75487	Glypican-4;Secreted glypican-4	sp|O75487|GPC4_HUMAN Glypican-4 OS=Homo sapiens OX=9606 GN=GPC4 PE=1 SV=4	NA	NA	NA	NA	24.2774	NA	NA	NA
GPCPD1	Q9NPB8	Glycerophosphocholine phosphodiesterase GPCPD1	sp|Q9NPB8|GPCP1_HUMAN Glycerophosphocholine phosphodiesterase GPCPD1 OS=Homo sapiens OX=9606 GN=GPCPD1 PE=1 SV=2	NA	NA	22.7244	22.4058	NA	NA	NA	NA
GPD1	P21695	Glycerol-3-phosphate dehydrogenase [NAD(+)], cytoplasmic	sp|P21695|GPDA_HUMAN Glycerol-3-phosphate dehydrogenase [NAD(+)], cytoplasmic OS=Homo sapiens OX=9606 GN=GPD1 PE=1 SV=4	24.732	25.3584	23.9164	25.2651	22.2675	22.6609	24.6649	22.5156
GPD1L	Q8N335	Glycerol-3-phosphate dehydrogenase 1-like protein	sp|Q8N335|GPD1L_HUMAN Glycerol-3-phosphate dehydrogenase 1-like protein OS=Homo sapiens OX=9606 GN=GPD1L PE=1 SV=1	26.5673	26.4584	26.3977	26.5845	24.3329	25.7408	26.2326	24.6278
GPD2	P43304	Glycerol-3-phosphate dehydrogenase, mitochondrial	sp|P43304|GPDM_HUMAN Glycerol-3-phosphate dehydrogenase, mitochondrial OS=Homo sapiens OX=9606 GN=GPD2 PE=1 SV=3	27.8653	28.3061	28.4896	28.2599	28.6891	29.2526	29.3439	28.6024
GPHN	Q9NQX3	Gephyrin;Molybdopterin adenylyltransferase;Molybdopterin molybdenumtransferase	sp|Q9NQX3|GEPH_HUMAN Gephyrin OS=Homo sapiens OX=9606 GN=GPHN PE=1 SV=1	26.9671	27.1683	27.5407	27.3748	24.9774	25.9818	26.2007	25.0803
GPI	P06744	Glucose-6-phosphate isomerase	sp|P06744|G6PI_HUMAN Glucose-6-phosphate isomerase OS=Homo sapiens OX=9606 GN=GPI PE=1 SV=4	31.3392	31.1719	31.1881	31.1106	30.1804	30.9209	31.3989	30.3531
GPM6A	P51674	Neuronal membrane glycoprotein M6-a	sp|P51674|GPM6A_HUMAN Neuronal membrane glycoprotein M6-a OS=Homo sapiens OX=9606 GN=GPM6A PE=1 SV=2	26.7447	26.2382	26.1523	26.5655	25.9651	27.0889	26.1116	25.984
GPM6B	Q13491	Neuronal membrane glycoprotein M6-b	sp|Q13491|GPM6B_HUMAN Neuronal membrane glycoprotein M6-b OS=Homo sapiens OX=9606 GN=GPM6B PE=1 SV=2	24.1047	24.1163	24.5037	24.3657	NA	24.5867	NA	24.2208
GPR158	Q5T848	Probable G-protein coupled receptor 158	sp|Q5T848|GP158_HUMAN Probable G-protein coupled receptor 158 OS=Homo sapiens OX=9606 GN=GPR158 PE=1 SV=1	24.5492	24.9842	25.2421	24.4532	24.7892	25.263	25.3183	25.1434
GPRC5B	Q9NZH0	G-protein coupled receptor family C group 5 member B	sp|Q9NZH0|GPC5B_HUMAN G-protein coupled receptor family C group 5 member B OS=Homo sapiens OX=9606 GN=GPRC5B PE=2 SV=2	23.6651	24.0914	24.2869	23.5109	NA	22.1335	22.6409	23.0135
GPRIN1	Q7Z2K8	G protein-regulated inducer of neurite outgrowth 1	sp|Q7Z2K8|GRIN1_HUMAN G protein-regulated inducer of neurite outgrowth 1 OS=Homo sapiens OX=9606 GN=GPRIN1 PE=1 SV=2	26.2245	26.1755	26.9306	25.3684	25.5958	27.3805	25.995	26.277
GPS1	Q13098	COP9 signalosome complex subunit 1	sp|Q13098|CSN1_HUMAN COP9 signalosome complex subunit 1 OS=Homo sapiens OX=9606 GN=GPS1 PE=1 SV=4	26.2041	26.046	26.0407	26.0298	25.1781	26.1287	26.6664	25.4484
GPSM1	Q86YR5	G-protein-signaling modulator 1	sp|Q86YR5|GPSM1_HUMAN G-protein-signaling modulator 1 OS=Homo sapiens OX=9606 GN=GPSM1 PE=1 SV=2	24.7331	24.0277	24.2126	24.0721	25.2403	24.9627	24.9826	24.7711
GPX1	P07203	Glutathione peroxidase 1	sp|P07203|GPX1_HUMAN Glutathione peroxidase 1 OS=Homo sapiens OX=9606 GN=GPX1 PE=1 SV=4	26.3412	25.4859	25.7794	26.3746	25.7112	26.1193	26.2197	24.8354
GPX4	P36969	Phospholipid hydroperoxide glutathione peroxidase, mitochondrial	sp|P36969|GPX4_HUMAN Phospholipid hydroperoxide glutathione peroxidase OS=Homo sapiens OX=9606 GN=GPX4 PE=1 SV=3	24.7031	24.5657	24.4299	25.0069	24.1202	24.4668	24.7049	24.5793
GRB2	P62993	Growth factor receptor-bound protein 2	sp|P62993|GRB2_HUMAN Growth factor receptor-bound protein 2 OS=Homo sapiens OX=9606 GN=GRB2 PE=1 SV=1	23.422	24.0159	23.3346	24.7452	NA	NA	NA	NA
GRHPR	Q9UBQ7	Glyoxylate reductase/hydroxypyruvate reductase	sp|Q9UBQ7|GRHPR_HUMAN Glyoxylate reductase/hydroxypyruvate reductase OS=Homo sapiens OX=9606 GN=GRHPR PE=1 SV=1	26.7183	27.0067	26.7415	26.8198	24.986	25.0569	25.1889	25.1605
GRIA1	P42261	Glutamate receptor 1	sp|P42261|GRIA1_HUMAN Glutamate receptor 1 OS=Homo sapiens OX=9606 GN=GRIA1 PE=1 SV=2	24.1279	24.3631	24.6703	24.3981	23.8594	25.1309	24.8501	24.758
GRIA2	P42262	Glutamate receptor 2	sp|P42262|GRIA2_HUMAN Glutamate receptor 2 OS=Homo sapiens OX=9606 GN=GRIA2 PE=1 SV=3	27.0206	27.8164	27.785	27.7569	25.9842	27.3083	25.8344	25.2368
GRIA3	P42263	Glutamate receptor 3	sp|P42263|GRIA3_HUMAN Glutamate receptor 3 OS=Homo sapiens OX=9606 GN=GRIA3 PE=1 SV=2	24.8724	25.2599	25.3133	25.1582	24.7211	25.3621	25.3223	24.8091
GRIA4	P48058	Glutamate receptor 4	sp|P48058|GRIA4_HUMAN Glutamate receptor 4 OS=Homo sapiens OX=9606 GN=GRIA4 PE=1 SV=2	22.3879	22.6095	22.5578	22.2167	NA	22.6932	22.5964	NA
GRIN1	Q05586	Glutamate receptor ionotropic, NMDA 1	sp|Q05586|NMDZ1_HUMAN Glutamate receptor ionotropic, NMDA 1 OS=Homo sapiens OX=9606 GN=GRIN1 PE=1 SV=1	25.296	25.8219	25.9099	25.8443	24.4024	26.0732	26.1354	26.3467
GRIN2A	Q12879	Glutamate receptor ionotropic, NMDA 2A	sp|Q12879|NMDE1_HUMAN Glutamate receptor ionotropic, NMDA 2A OS=Homo sapiens OX=9606 GN=GRIN2A PE=1 SV=1	22.4489	22.8888	23.2028	22.8046	NA	23.0549	23.2047	NA
GRIN2B	Q13224	Glutamate receptor ionotropic, NMDA 2B	sp|Q13224|NMDE2_HUMAN Glutamate receptor ionotropic, NMDA 2B OS=Homo sapiens OX=9606 GN=GRIN2B PE=1 SV=3	23.9733	24.7043	24.9853	24.1489	23.9139	24.9736	24.4656	24.1877
GRIPAP1	Q4V328	GRIP1-associated protein 1	sp|Q4V328|GRAP1_HUMAN GRIP1-associated protein 1 OS=Homo sapiens OX=9606 GN=GRIPAP1 PE=1 SV=2	26.8862	27.0111	26.955	26.9496	27.3906	27.3526	27.428	27.8445
GRM2	Q14416	Metabotropic glutamate receptor 2	sp|Q14416|GRM2_HUMAN Metabotropic glutamate receptor 2 OS=Homo sapiens OX=9606 GN=GRM2 PE=1 SV=2	24.2474	24.4785	24.8447	23.6567	24.7798	25.6974	24.2994	25.6024
GRM3	Q14832	Metabotropic glutamate receptor 3	sp|Q14832|GRM3_HUMAN Metabotropic glutamate receptor 3 OS=Homo sapiens OX=9606 GN=GRM3 PE=1 SV=2	24.1104	25.0436	25.0823	24.6732	23.4539	24.9022	25.078	25.3628
GRM5	P41594	Metabotropic glutamate receptor 5	sp|P41594|GRM5_HUMAN Metabotropic glutamate receptor 5 OS=Homo sapiens OX=9606 GN=GRM5 PE=1 SV=2	23.7793	24.3865	24.0889	23.8176	NA	24.7	24.4658	25.3565
GRM7	Q14831	Metabotropic glutamate receptor 7	sp|Q14831|GRM7_HUMAN Metabotropic glutamate receptor 7 OS=Homo sapiens OX=9606 GN=GRM7 PE=1 SV=1	NA	NA	22.2797	NA	22.6379	22.5328	23.1269	23.5174
GRPEL1	Q9HAV7	GrpE protein homolog 1, mitochondrial	sp|Q9HAV7|GRPE1_HUMAN GrpE protein homolog 1, mitochondrial OS=Homo sapiens OX=9606 GN=GRPEL1 PE=1 SV=2	24.8788	25.1673	25.075	25.074	25.5947	25.6629	25.9374	23.4666
GRSF1	Q12849	G-rich sequence factor 1	sp|Q12849|GRSF1_HUMAN G-rich sequence factor 1 OS=Homo sapiens OX=9606 GN=GRSF1 PE=1 SV=3	23.5101	23.4477	23.216	23.1104	24.7613	23.5099	NA	24.5926
GSK3A	P49840	Glycogen synthase kinase-3 alpha	sp|P49840|GSK3A_HUMAN Glycogen synthase kinase-3 alpha OS=Homo sapiens OX=9606 GN=GSK3A PE=1 SV=2	27.0805	27.1861	27.2534	27.1403	26.8742	26.9417	27.8804	26.3763
GSK3B	P49841	Glycogen synthase kinase-3 beta	sp|P49841|GSK3B_HUMAN Glycogen synthase kinase-3 beta OS=Homo sapiens OX=9606 GN=GSK3B PE=1 SV=2	25.4196	25.8913	26.0325	25.5334	25.6663	25.8404	26.813	24.9818
GSN	P06396	Gelsolin	sp|P06396|GELS_HUMAN Gelsolin OS=Homo sapiens OX=9606 GN=GSN PE=1 SV=1	27.239	27.4924	27.5568	28.0235	26.8715	26.4241	25.1547	24.0556
GSPT1	P15170	Eukaryotic peptide chain release factor GTP-binding subunit ERF3A;Eukaryotic peptide chain release factor GTP-binding subunit ERF3B	sp|P15170|ERF3A_HUMAN Eukaryotic peptide chain release factor GTP-binding subunit ERF3A OS=Homo sapiens OX=9606 GN=GSPT1 PE=1 SV=1;sp|Q8IYD1|ERF3B_HUMAN Eukaryotic peptide chain release factor GTP-binding subunit ERF3B OS=Homo sapiens OX=9606 GN=GSPT2 PE=1	23.6608	23.5511	22.8895	23.8611	24.1683	24.1044	24.3116	24.0509
GSR	P00390	Glutathione reductase, mitochondrial	sp|P00390|GSHR_HUMAN Glutathione reductase, mitochondrial OS=Homo sapiens OX=9606 GN=GSR PE=1 SV=2	25.039	24.9221	24.7799	24.7393	23.4397	23.7289	24.4413	23.7591
GSS	P48637	Glutathione synthetase	sp|P48637|GSHB_HUMAN Glutathione synthetase OS=Homo sapiens OX=9606 GN=GSS PE=1 SV=1	24.0267	24.4479	23.9127	24.0172	23.7017	23.7091	24.2921	23.806
GSTK1	Q9Y2Q3	Glutathione S-transferase kappa 1	sp|Q9Y2Q3|GSTK1_HUMAN Glutathione S-transferase kappa 1 OS=Homo sapiens OX=9606 GN=GSTK1 PE=1 SV=3	24.6915	24.6481	24.1663	24.7067	24.7563	24.6075	24.7679	24.2889
GSTM1	P09488	Glutathione S-transferase Mu 1	sp|P09488|GSTM1_HUMAN Glutathione S-transferase Mu 1 OS=Homo sapiens OX=9606 GN=GSTM1 PE=1 SV=3	25.8938	NA	NA	25.3095	NA	NA	NA	NA
GSTM2	P28161	Glutathione S-transferase Mu 2	sp|P28161|GSTM2_HUMAN Glutathione S-transferase Mu 2 OS=Homo sapiens OX=9606 GN=GSTM2 PE=1 SV=2	27.3133	26.9965	26.7641	27.2606	25.1499	26.286	26.0265	25.5635
GSTM3	P21266	Glutathione S-transferase Mu 3	sp|P21266|GSTM3_HUMAN Glutathione S-transferase Mu 3 OS=Homo sapiens OX=9606 GN=GSTM3 PE=1 SV=3	26.4865	26.7873	26.6487	28.127	26.6079	26.4902	26.5434	26.3679
GSTM5	P46439	Glutathione S-transferase Mu 5	sp|P46439|GSTM5_HUMAN Glutathione S-transferase Mu 5 OS=Homo sapiens OX=9606 GN=GSTM5 PE=1 SV=3	NA	NA	24.3011	NA	NA	NA	NA	NA
GSTO1	P78417	Glutathione S-transferase omega-1	sp|P78417|GSTO1_HUMAN Glutathione S-transferase omega-1 OS=Homo sapiens OX=9606 GN=GSTO1 PE=1 SV=2	27.5522	27.3657	27.2548	28.1523	27.1703	26.7744	26.9932	25.5709
GSTP1	P09211	Glutathione S-transferase P	sp|P09211|GSTP1_HUMAN Glutathione S-transferase P OS=Homo sapiens OX=9606 GN=GSTP1 PE=1 SV=2	28.4001	28.368	28.1643	29.0458	28.1139	27.9118	27.0955	28.0447
GSTT1	P30711	Glutathione S-transferase theta-1	sp|P30711|GSTT1_HUMAN Glutathione S-transferase theta-1 OS=Homo sapiens OX=9606 GN=GSTT1 PE=1 SV=4	23.1077	23.2753	NA	23.904	NA	23.3181	NA	NA
GSTT2B	P0CG30	Glutathione S-transferase theta-2B;Glutathione S-transferase theta-2	sp|P0CG30|GSTT2_HUMAN Glutathione S-transferase theta-2B OS=Homo sapiens OX=9606 GN=GSTT2B PE=1 SV=1;sp|P0CG29|GST2_HUMAN Glutathione S-transferase theta-2 OS=Homo sapiens OX=9606 GN=GSTT2 PE=1 SV=1	NA	NA	23.6137	22.6983	23.492	NA	23.2054	NA
GTPBP1	O00178	GTP-binding protein 1	sp|O00178|GTPB1_HUMAN GTP-binding protein 1 OS=Homo sapiens OX=9606 GN=GTPBP1 PE=1 SV=3	23.655	23.4078	23.7795	22.9592	24.4603	24.5613	23.8736	26.4941
GUCY1A2	P33402	Guanylate cyclase soluble subunit alpha-2	sp|P33402|GCYA2_HUMAN Guanylate cyclase soluble subunit alpha-2 OS=Homo sapiens OX=9606 GN=GUCY1A2 PE=1 SV=1	24.6795	24.9281	25.2059	24.6978	NA	26.0608	25.7332	25.0705
GUCY1A3	Q02108	Guanylate cyclase soluble subunit alpha-3	sp|Q02108|GCYA1_HUMAN Guanylate cyclase soluble subunit alpha-1 OS=Homo sapiens OX=9606 GN=GUCY1A1 PE=1 SV=2	22.4436	NA	NA	22.3642	NA	NA	NA	NA
GUCY1B3	Q02153	Guanylate cyclase soluble subunit beta-1	sp|Q02153|GCYB1_HUMAN Guanylate cyclase soluble subunit beta-1 OS=Homo sapiens OX=9606 GN=GUCY1B1 PE=1 SV=1	24.0408	24.1961	24.1429	24.4389	23.2333	24.2122	24.6352	23.4918
GUK1	Q16774	Guanylate kinase	sp|Q16774|KGUA_HUMAN Guanylate kinase OS=Homo sapiens OX=9606 GN=GUK1 PE=1 SV=2	26.9476	26.2778	25.8163	26.1147	27.7487	27.3576	26.8931	28.0192
GYG1	P46976	Glycogenin-1	sp|P46976|GLYG_HUMAN Glycogenin-1 OS=Homo sapiens OX=9606 GN=GYG1 PE=1 SV=4	24.8829	24.8966	24.8355	25.2449	NA	NA	NA	NA
GYS1	P13807	Glycogen [starch] synthase, muscle	sp|P13807|GYS1_HUMAN Glycogen [starch] synthase, muscle OS=Homo sapiens OX=9606 GN=GYS1 PE=1 SV=2	23.7912	24.1448	24.3058	23.948	25.1459	22.777	23.2414	NA
H1F0	P07305	Histone H1.0;Histone H1.0, N-terminally processed	sp|P07305|H10_HUMAN Histone H1.0 OS=Homo sapiens OX=9606 GN=H1F0 PE=1 SV=3	NA	23.5293	24.5469	25.0421	25.5228	23.5215	24.897	25.0944
H1FX	Q92522	Histone H1x	sp|Q92522|H1X_HUMAN Histone H1x OS=Homo sapiens OX=9606 GN=H1FX PE=1 SV=1	NA	NA	NA	24.2324	23.3958	NA	NA	23.2093
H2AFV	Q71UI9	Histone H2A.V;Histone H2A.Z	sp|Q71UI9|H2AV_HUMAN Histone H2A.V OS=Homo sapiens OX=9606 GN=H2AFV PE=1 SV=3;sp|P0C0S5|H2AZ_HUMAN Histone H2A.Z OS=Homo sapiens OX=9606 GN=H2AFZ PE=1 SV=2	NA	NA	NA	NA	23.4103	NA	21.708	24.2971
H2AFX	P16104	Histone H2AX	sp|P16104|H2AX_HUMAN Histone H2AX OS=Homo sapiens OX=9606 GN=H2AFX PE=1 SV=2	23.5164	NA	24.5452	NA	26.2622	23.775	22.9611	26.3876
H2AFY	O75367	Core histone macro-H2A.1	sp|O75367|H2AY_HUMAN Core histone macro-H2A.1 OS=Homo sapiens OX=9606 GN=H2AFY PE=1 SV=4	25.253	25.2207	25.4134	25.8488	26.6471	25.8778	26.3163	26.9446
H2AFY2	Q9P0M6	Core histone macro-H2A.2	sp|Q9P0M6|H2AW_HUMAN Core histone macro-H2A.2 OS=Homo sapiens OX=9606 GN=H2AFY2 PE=1 SV=3	22.2924	NA	NA	NA	NA	NA	NA	NA
HACD3	Q9P035	Very-long-chain (3R)-3-hydroxyacyl-CoA dehydratase 3	sp|Q9P035|HACD3_HUMAN Very-long-chain (3R)-3-hydroxyacyl-CoA dehydratase 3 OS=Homo sapiens OX=9606 GN=HACD3 PE=1 SV=2	26.0609	26.1866	26.2232	26.1303	26.8439	26.2016	26.3204	25.8079
HADH	Q16836	Hydroxyacyl-coenzyme A dehydrogenase, mitochondrial	sp|Q16836|HCDH_HUMAN Hydroxyacyl-coenzyme A dehydrogenase, mitochondrial OS=Homo sapiens OX=9606 GN=HADH PE=1 SV=3	26.2488	25.8733	25.6568	26.2443	24.6379	24.7713	24.5413	24.3145
HADHA	P40939	Trifunctional enzyme subunit alpha, mitochondrial;Long-chain enoyl-CoA hydratase;Long chain 3-hydroxyacyl-CoA dehydrogenase	sp|P40939|ECHA_HUMAN Trifunctional enzyme subunit alpha, mitochondrial OS=Homo sapiens OX=9606 GN=HADHA PE=1 SV=2	29.3672	29.522	29.6112	29.777	28.5443	28.5178	28.6787	28.7616
HADHB	P55084	Trifunctional enzyme subunit beta, mitochondrial;3-ketoacyl-CoA thiolase	sp|P55084|ECHB_HUMAN Trifunctional enzyme subunit beta, mitochondrial OS=Homo sapiens OX=9606 GN=HADHB PE=1 SV=3	28.7295	28.7436	28.6877	28.9887	27.7767	27.6484	28.0163	28.0486
HAGH	Q16775	Hydroxyacylglutathione hydrolase, mitochondrial	sp|Q16775|GLO2_HUMAN Hydroxyacylglutathione hydrolase, mitochondrial OS=Homo sapiens OX=9606 GN=HAGH PE=1 SV=2	22.7672	NA	NA	NA	NA	NA	NA	NA
HAPLN1	P10915	Hyaluronan and proteoglycan link protein 1	sp|P10915|HPLN1_HUMAN Hyaluronan and proteoglycan link protein 1 OS=Homo sapiens OX=9606 GN=HAPLN1 PE=2 SV=2	24.6481	25.7385	25.34	25.4879	24.4076	25.4256	26.2974	25.4113
HAPLN2	Q9GZV7	Hyaluronan and proteoglycan link protein 2	sp|Q9GZV7|HPLN2_HUMAN Hyaluronan and proteoglycan link protein 2 OS=Homo sapiens OX=9606 GN=HAPLN2 PE=2 SV=1	25.7395	25.8234	25.4371	27.0622	24.9264	22.2847	25.1663	NA
HAPLN4	Q86UW8	Hyaluronan and proteoglycan link protein 4	sp|Q86UW8|HPLN4_HUMAN Hyaluronan and proteoglycan link protein 4 OS=Homo sapiens OX=9606 GN=HAPLN4 PE=2 SV=1	23.6805	23.588	23.7133	25.0136	NA	23.9487	NA	24.6554
HARS	P12081	Histidine--tRNA ligase, cytoplasmic	sp|P12081|SYHC_HUMAN Histidine--tRNA ligase, cytoplasmic OS=Homo sapiens OX=9606 GN=HARS PE=1 SV=2	25.3055	25.5644	25.5152	25.3825	24.0782	24.4743	25.6658	24.8127
HAX1	O00165	HCLS1-associated protein X-1	sp|O00165|HAX1_HUMAN HCLS1-associated protein X-1 OS=Homo sapiens OX=9606 GN=HAX1 PE=1 SV=2	NA	23.0538	21.9423	22.5071	24.5148	23.4229	23.933	23.4576
HBA1	P69905	Hemoglobin subunit alpha	sp|P69905|HBA_HUMAN Hemoglobin subunit alpha OS=Homo sapiens OX=9606 GN=HBA1 PE=1 SV=2	30.9	29.8423	25.1511	29.8061	30.9114	30.6479	31.4417	31.7707
HBB	P68871	Hemoglobin subunit beta;LVV-hemorphin-7;Spinorphin	sp|P68871|HBB_HUMAN Hemoglobin subunit beta OS=Homo sapiens OX=9606 GN=HBB PE=1 SV=2	32.4269	32.3818	26.4782	32.1641	32.705	32.5318	33.1188	32.8273
HBD	P02042	Hemoglobin subunit delta	sp|P02042|HBD_HUMAN Hemoglobin subunit delta OS=Homo sapiens OX=9606 GN=HBD PE=1 SV=2	27.7485	27.8917	NA	28.2395	27.2944	27.7707	28.2672	27.781
HBS1L	Q9Y450	HBS1-like protein	sp|Q9Y450|HBS1L_HUMAN HBS1-like protein OS=Homo sapiens OX=9606 GN=HBS1L PE=1 SV=1	23.9345	24.483	24.71	24.7082	24.3611	24.0946	24.2871	24.6884
HCFC1	P51610	Host cell factor 1;HCF N-terminal chain 1;HCF N-terminal chain 2;HCF N-terminal chain 3;HCF N-terminal chain 4;HCF N-terminal chain 5;HCF N-terminal chain 6;HCF C-terminal chain 1;HCF C-terminal chain 2;HCF C-terminal chain 3;HCF C-terminal chain 4;HCF C-terminal chain 5;HCF C-terminal chain 6	#VALUE!	#VALUE!	#VALUE!	#VALUE!	#VALUE!	#VALUE!	#VALUE!	#VALUE!	#VALUE!
HCLS1	P14317	Hematopoietic lineage cell-specific protein	sp|P14317|HCLS1_HUMAN Hematopoietic lineage cell-specific protein OS=Homo sapiens OX=9606 GN=HCLS1 PE=1 SV=3	NA	NA	NA	NA	NA	23.4377	NA	NA
HCN1	O60741	Potassium/sodium hyperpolarization-activated cyclic nucleotide-gated channel 1	sp|O60741|HCN1_HUMAN Potassium/sodium hyperpolarization-activated cyclic nucleotide-gated channel 1 OS=Homo sapiens OX=9606 GN=HCN1 PE=1 SV=3	23.302	23.4403	23.9623	23.3676	NA	23.6149	23.6362	NA
HCN2	Q9UL51	Potassium/sodium hyperpolarization-activated cyclic nucleotide-gated channel 2	sp|Q9UL51|HCN2_HUMAN Potassium/sodium hyperpolarization-activated cyclic nucleotide-gated channel 2 OS=Homo sapiens OX=9606 GN=HCN2 PE=1 SV=3	22.6089	22.823	22.6783	22.5901	NA	NA	NA	NA
HDAC11	Q96DB2	Histone deacetylase 11	sp|Q96DB2|HDA11_HUMAN Histone deacetylase 11 OS=Homo sapiens OX=9606 GN=HDAC11 PE=1 SV=1	23.0198	23.2278	23.4486	24.1771	NA	22.4665	NA	NA
HDGF	P51858	Hepatoma-derived growth factor	sp|P51858|HDGF_HUMAN Hepatoma-derived growth factor OS=Homo sapiens OX=9606 GN=HDGF PE=1 SV=1	NA	NA	22.5177	23.7932	NA	NA	NA	NA
HDHD1	Q08623	Pseudouridine-5-phosphatase	sp|Q08623|HDHD1_HUMAN Pseudouridine-5-phosphatase OS=Homo sapiens OX=9606 GN=PUDP PE=1 SV=3	22.8823	23.328	22.5904	24.071	NA	NA	NA	NA
HDHD2	Q9H0R4	Haloacid dehalogenase-like hydrolase domain-containing protein 2	sp|Q9H0R4|HDHD2_HUMAN Haloacid dehalogenase-like hydrolase domain-containing protein 2 OS=Homo sapiens OX=9606 GN=HDHD2 PE=1 SV=1	24.7627	25.0177	25.1638	25.5744	NA	23.849	NA	24.0919
HDLBP	Q00341	Vigilin	sp|Q00341|VIGLN_HUMAN Vigilin OS=Homo sapiens OX=9606 GN=HDLBP PE=1 SV=2	25.099	25.5114	25.1075	25.2607	25.4073	24.3942	24.9062	25.0398
HEBP1	Q9NRV9	Heme-binding protein 1	sp|Q9NRV9|HEBP1_HUMAN Heme-binding protein 1 OS=Homo sapiens OX=9606 GN=HEBP1 PE=1 SV=1	25.8143	25.9524	25.764	26.4412	25.4831	25.4823	25.4491	22.9145
HEBP2	Q9Y5Z4	Heme-binding protein 2	sp|Q9Y5Z4|HEBP2_HUMAN Heme-binding protein 2 OS=Homo sapiens OX=9606 GN=HEBP2 PE=1 SV=1	NA	NA	NA	22.4808	NA	NA	NA	NA
HECTD3	Q5T447	E3 ubiquitin-protein ligase HECTD3	sp|Q5T447|HECD3_HUMAN E3 ubiquitin-protein ligase HECTD3 OS=Homo sapiens OX=9606 GN=HECTD3 PE=1 SV=1	21.964	22.0415	22.2756	22.1181	NA	21.7042	NA	NA
HECTD4	Q9Y4D8	Probable E3 ubiquitin-protein ligase HECTD4	sp|Q9Y4D8|HECD4_HUMAN Probable E3 ubiquitin-protein ligase HECTD4 OS=Homo sapiens OX=9606 GN=HECTD4 PE=1 SV=5	23.7917	23.6645	24.2676	23.8548	NA	23.7631	23.8261	23.403
HECW1	Q76N89	E3 ubiquitin-protein ligase HECW1	sp|Q76N89|HECW1_HUMAN E3 ubiquitin-protein ligase HECW1 OS=Homo sapiens OX=9606 GN=HECW1 PE=1 SV=3	21.6682	NA	NA	NA	NA	21.6155	NA	23.0306
HECW2	Q9P2P5	E3 ubiquitin-protein ligase HECW2	sp|Q9P2P5|HECW2_HUMAN E3 ubiquitin-protein ligase HECW2 OS=Homo sapiens OX=9606 GN=HECW2 PE=1 SV=2	24.0228	24.2622	24.1877	23.8906	23.7639	24.4052	24.1303	24.7373
HEPACAM	Q14CZ8	Hepatocyte cell adhesion molecule	sp|Q14CZ8|HECAM_HUMAN Hepatocyte cell adhesion molecule OS=Homo sapiens OX=9606 GN=HEPACAM PE=1 SV=1	27.5316	27.0472	27.386	27.2372	26.6816	26.1856	26.5928	27.6237
HERC4	Q5GLZ8	Probable E3 ubiquitin-protein ligase HERC4	sp|Q5GLZ8|HERC4_HUMAN Probable E3 ubiquitin-protein ligase HERC4 OS=Homo sapiens OX=9606 GN=HERC4 PE=1 SV=1	22.9768	23.074	23.3819	23.2412	NA	NA	NA	NA
HGS	O14964	Hepatocyte growth factor-regulated tyrosine kinase substrate	sp|O14964|HGS_HUMAN Hepatocyte growth factor-regulated tyrosine kinase substrate OS=Homo sapiens OX=9606 GN=HGS PE=1 SV=1	26.4848	26.2975	26.291	26.3467	25.323	26.3648	26.953	25.0382
HIBADH	P31937	3-hydroxyisobutyrate dehydrogenase, mitochondrial	sp|P31937|3HIDH_HUMAN 3-hydroxyisobutyrate dehydrogenase, mitochondrial OS=Homo sapiens OX=9606 GN=HIBADH PE=1 SV=2	24.488	24.8441	24.6576	25.5639	NA	23.3798	NA	NA
HIBCH	Q6NVY1	3-hydroxyisobutyryl-CoA hydrolase, mitochondrial	sp|Q6NVY1|HIBCH_HUMAN 3-hydroxyisobutyryl-CoA hydrolase, mitochondrial OS=Homo sapiens OX=9606 GN=HIBCH PE=1 SV=2	25.2046	25.3894	25.2097	24.9546	24.3223	24.64	25.1345	23.6737
HIGD1A	Q9Y241	HIG1 domain family member 1A, mitochondrial	sp|Q9Y241|HIG1A_HUMAN HIG1 domain family member 1A, mitochondrial OS=Homo sapiens OX=9606 GN=HIGD1A PE=1 SV=1	25.8985	25.4865	25.2005	26.7851	27.8398	26.4358	27.2675	27.717
HIGD2A	Q9BW72	HIG1 domain family member 2A, mitochondrial	sp|Q9BW72|HIG2A_HUMAN HIG1 domain family member 2A, mitochondrial OS=Homo sapiens OX=9606 GN=HIGD2A PE=1 SV=1	NA	NA	NA	25.3207	27.1431	NA	NA	NA
HINT1	P49773	Histidine triad nucleotide-binding protein 1	sp|P49773|HINT1_HUMAN Histidine triad nucleotide-binding protein 1 OS=Homo sapiens OX=9606 GN=HINT1 PE=1 SV=2	25.6691	26.0186	24.841	26.2614	NA	23.635	24.7703	24.1231
HINT3	Q9NQE9	Histidine triad nucleotide-binding protein 3	sp|Q9NQE9|HINT3_HUMAN Histidine triad nucleotide-binding protein 3 OS=Homo sapiens OX=9606 GN=HINT3 PE=1 SV=1	24.8413	24.6336	24.6326	24.821	NA	24.585	24.8362	23.9288
HIP1	O00291	Huntingtin-interacting protein 1	sp|O00291|HIP1_HUMAN Huntingtin-interacting protein 1 OS=Homo sapiens OX=9606 GN=HIP1 PE=1 SV=5	22.1037	24.4863	24.3705	24.7473	24.3807	24.3507	25.1041	23.2804
HIP1R	O75146	Huntingtin-interacting protein 1-related protein	sp|O75146|HIP1R_HUMAN Huntingtin-interacting protein 1-related protein OS=Homo sapiens OX=9606 GN=HIP1R PE=1 SV=2	25.331	25.4735	25.54	25.5403	25.0399	25.0513	25.5286	25.3061
HIST1H1C	P16403	Histone H1.2	sp|P16403|H12_HUMAN Histone H1.2 OS=Homo sapiens OX=9606 GN=HIST1H1C PE=1 SV=2	22.5692	21.6748	NA	NA	24.5409	22.4422	24.3539	23.7742
HIST1H1E	P10412	Histone H1.4;Histone H1.3	sp|P10412|H14_HUMAN Histone H1.4 OS=Homo sapiens OX=9606 GN=HIST1H1E PE=1 SV=2;sp|P16402|H13_HUMAN Histone H1.3 OS=Homo sapiens OX=9606 GN=HIST1H1D PE=1 SV=2	22.353	22.6525	23.6035	NA	25.834	23.9922	26.2377	25.6303
HIST1H2BD	P58876	Histone H2B type 1-D	sp|P58876|H2B1D_HUMAN Histone H2B type 1-D OS=Homo sapiens OX=9606 GN=HIST1H2BD PE=1 SV=2	NA	NA	NA	NA	22.4156	NA	NA	NA
HIST1H4A	P62805	Histone H4	sp|P62805|H4_HUMAN Histone H4 OS=Homo sapiens OX=9606 GN=HIST1H4A PE=1 SV=2	31.0919	30.6974	30.7106	30.8406	33.1374	31.9229	32.5359	33.1372
HIST2H3A	Q71DI3	Histone H3.2;Histone H3.3;Histone H3.1;Histone H3.3C;Histone H3.1t	sp|Q71DI3|H32_HUMAN Histone H3.2 OS=Homo sapiens OX=9606 GN=HIST2H3A PE=1 SV=3;sp|P84243|H33_HUMAN Histone H3.3 OS=Homo sapiens OX=9606 GN=H3F3A PE=1 SV=2;sp|P68431|H31_HUMAN Histone H3.1 OS=Homo sapiens OX=9606 GN=HIST1H3A PE=1 SV=2;sp|Q6NXT2|H3C_HUMAN Hi	30.7881	30.2148	30.177	30.1548	32.8107	31.4618	32.0492	32.8259
HK1	P19367	Hexokinase-1	sp|P19367|HXK1_HUMAN Hexokinase-1 OS=Homo sapiens OX=9606 GN=HK1 PE=1 SV=3	31.8695	31.562	31.5589	31.4706	32.0052	32.194	32.0231	31.8837
HKDC1	Q2TB90	Putative hexokinase HKDC1	sp|Q2TB90|HKDC1_HUMAN Hexokinase HKDC1 OS=Homo sapiens OX=9606 GN=HKDC1 PE=1 SV=3	NA	NA	NA	NA	23.2202	NA	NA	NA
HMGB1	P09429	High mobility group protein B1	sp|P09429|HMGB1_HUMAN High mobility group protein B1 OS=Homo sapiens OX=9606 GN=HMGB1 PE=1 SV=3	23.1128	22.6323	23.1241	23.8056	24.3353	NA	24.5647	24.0224
HMGCS1	Q01581	Hydroxymethylglutaryl-CoA synthase, cytoplasmic	sp|Q01581|HMCS1_HUMAN Hydroxymethylglutaryl-CoA synthase, cytoplasmic OS=Homo sapiens OX=9606 GN=HMGCS1 PE=1 SV=2	23.7624	24.1527	23.9754	23.7561	23.3052	NA	NA	23.6323
HMOX1	P09601	Heme oxygenase 1	sp|P09601|HMOX1_HUMAN Heme oxygenase 1 OS=Homo sapiens OX=9606 GN=HMOX1 PE=1 SV=1	NA	NA	NA	NA	NA	25.248	26.1336	NA
HMOX2	P30519	Heme oxygenase 2	sp|P30519|HMOX2_HUMAN Heme oxygenase 2 OS=Homo sapiens OX=9606 GN=HMOX2 PE=1 SV=2	26.9955	27.3091	27.2422	27.1805	27.6909	27.1956	27.7053	27.3214
HNMT	P50135	Histamine N-methyltransferase	sp|P50135|HNMT_HUMAN Histamine N-methyltransferase OS=Homo sapiens OX=9606 GN=HNMT PE=1 SV=1	23.6638	24.3808	24.0292	24.3398	NA	23.6672	NA	NA
HNRNPA0	Q13151	Heterogeneous nuclear ribonucleoprotein A0	sp|Q13151|ROA0_HUMAN Heterogeneous nuclear ribonucleoprotein A0 OS=Homo sapiens OX=9606 GN=HNRNPA0 PE=1 SV=1	25.2535	25.7979	25.3522	25.8925	26.411	25.3752	22.7377	26.2196
HNRNPA1	P09651	Heterogeneous nuclear ribonucleoprotein A1;Heterogeneous nuclear ribonucleoprotein A1, N-terminally processed;Heterogeneous nuclear ribonucleoprotein A1-like 2	sp|P09651|ROA1_HUMAN Heterogeneous nuclear ribonucleoprotein A1 OS=Homo sapiens OX=9606 GN=HNRNPA1 PE=1 SV=5;sp|Q32P51|RA1L2_HUMAN Heterogeneous nuclear ribonucleoprotein A1-like 2 OS=Homo sapiens OX=9606 GN=HNRNPA1L2 PE=2 SV=2	27.8579	27.9915	27.4484	28.2431	29.3268	29.1865	29.3533	29.401
HNRNPA2B1	P22626	Heterogeneous nuclear ribonucleoproteins A2/B1	sp|P22626|ROA2_HUMAN Heterogeneous nuclear ribonucleoproteins A2/B1 OS=Homo sapiens OX=9606 GN=HNRNPA2B1 PE=1 SV=2	28.4292	28.3422	28.14	28.5653	29.9311	30.0335	30.4891	29.6536
HNRNPA3	P51991	Heterogeneous nuclear ribonucleoprotein A3	sp|P51991|ROA3_HUMAN Heterogeneous nuclear ribonucleoprotein A3 OS=Homo sapiens OX=9606 GN=HNRNPA3 PE=1 SV=2	26.8516	27.0569	26.4585	27.2366	28.1664	28.2398	27.7857	28.4394
HNRNPAB	Q99729	Heterogeneous nuclear ribonucleoprotein A/B	sp|Q99729|ROAA_HUMAN Heterogeneous nuclear ribonucleoprotein A/B OS=Homo sapiens OX=9606 GN=HNRNPAB PE=1 SV=2	NA	NA	NA	22.8356	NA	NA	NA	NA
HNRNPC	P07910	Heterogeneous nuclear ribonucleoproteins C1/C2	sp|P07910|HNRPC_HUMAN Heterogeneous nuclear ribonucleoproteins C1/C2 OS=Homo sapiens OX=9606 GN=HNRNPC PE=1 SV=4	28.276	28.1204	28.3664	28.6003	30.1107	29.1203	28.9804	29.6764
HNRNPCL1	O60812	Heterogeneous nuclear ribonucleoprotein C-like 1;Heterogeneous nuclear ribonucleoprotein C-like 4;Heterogeneous nuclear ribonucleoprotein C-like 3	sp|O60812|HNRC1_HUMAN Heterogeneous nuclear ribonucleoprotein C-like 1 OS=Homo sapiens OX=9606 GN=HNRNPCL1 PE=1 SV=1;sp|P0DMR1|HNRC4_HUMAN Heterogeneous nuclear ribonucleoprotein C-like 4 OS=Homo sapiens OX=9606 GN=HNRNPCL4 PE=3 SV=1;sp|B7ZW38|HNRC3_HUMAN	NA	NA	NA	NA	27.645	NA	NA	NA
HNRNPD	Q14103	Heterogeneous nuclear ribonucleoprotein D0	sp|Q14103|HNRPD_HUMAN Heterogeneous nuclear ribonucleoprotein D0 OS=Homo sapiens OX=9606 GN=HNRNPD PE=1 SV=1	26.3427	26.9111	26.7919	26.2257	26.6064	26.3078	25.8255	26.3964
HNRNPDL	O14979	Heterogeneous nuclear ribonucleoprotein D-like	sp|O14979|HNRDL_HUMAN Heterogeneous nuclear ribonucleoprotein D-like OS=Homo sapiens OX=9606 GN=HNRNPDL PE=1 SV=3	25.7566	26.6443	26.642	26.5631	25.5382	26.5214	25.8928	26.0584
HNRNPF	P52597	Heterogeneous nuclear ribonucleoprotein F;Heterogeneous nuclear ribonucleoprotein F, N-terminally processed	sp|P52597|HNRPF_HUMAN Heterogeneous nuclear ribonucleoprotein F OS=Homo sapiens OX=9606 GN=HNRNPF PE=1 SV=3	NA	24.2412	24.4124	24.715	25.007	24.841	25.1583	24.7289
HNRNPH1	P31943	Heterogeneous nuclear ribonucleoprotein H;Heterogeneous nuclear ribonucleoprotein H, N-terminally processed	sp|P31943|HNRH1_HUMAN Heterogeneous nuclear ribonucleoprotein H OS=Homo sapiens OX=9606 GN=HNRNPH1 PE=1 SV=4	25.4677	25.9245	25.7671	26.0724	26.6641	26.5083	26.8316	26.2951
HNRNPH2	P55795	Heterogeneous nuclear ribonucleoprotein H2	sp|P55795|HNRH2_HUMAN Heterogeneous nuclear ribonucleoprotein H2 OS=Homo sapiens OX=9606 GN=HNRNPH2 PE=1 SV=1	25.2204	25.1712	25.3175	25.2964	26.0506	25.9013	26.7728	26.7932
HNRNPH3	P31942	Heterogeneous nuclear ribonucleoprotein H3	sp|P31942|HNRH3_HUMAN Heterogeneous nuclear ribonucleoprotein H3 OS=Homo sapiens OX=9606 GN=HNRNPH3 PE=1 SV=2	25.7096	25.9148	25.1041	26.4038	27.107	26.7482	25.7599	25.9872
HNRNPK	P61978	Heterogeneous nuclear ribonucleoprotein K	sp|P61978|HNRPK_HUMAN Heterogeneous nuclear ribonucleoprotein K OS=Homo sapiens OX=9606 GN=HNRNPK PE=1 SV=1	28.5435	28.8072	28.8221	29.3279	29.1597	29.1412	29.3826	29.2658
HNRNPL	P14866	Heterogeneous nuclear ribonucleoprotein L	sp|P14866|HNRPL_HUMAN Heterogeneous nuclear ribonucleoprotein L OS=Homo sapiens OX=9606 GN=HNRNPL PE=1 SV=2	25.6537	25.7648	25.7984	26.115	26.1016	26.4808	24.6064	26.2108
HNRNPLL	Q8WVV9	Heterogeneous nuclear ribonucleoprotein L-like	sp|Q8WVV9|HNRLL_HUMAN Heterogeneous nuclear ribonucleoprotein L-like OS=Homo sapiens OX=9606 GN=HNRNPLL PE=1 SV=1	23.1535	23.4068	22.9486	23.7958	23.0038	23.4298	NA	23.5444
HNRNPM	P52272	Heterogeneous nuclear ribonucleoprotein M	sp|P52272|HNRPM_HUMAN Heterogeneous nuclear ribonucleoprotein M OS=Homo sapiens OX=9606 GN=HNRNPM PE=1 SV=3	28.0705	27.8972	27.9236	28.2059	29.2963	28.7079	28.9203	29.4181
HNRNPR	O43390	Heterogeneous nuclear ribonucleoprotein R	sp|O43390|HNRPR_HUMAN Heterogeneous nuclear ribonucleoprotein R OS=Homo sapiens OX=9606 GN=HNRNPR PE=1 SV=1	26.5378	26.7534	26.6324	27.0299	27.5132	27.4274	28.0717	27.644
HNRNPU	Q00839	Heterogeneous nuclear ribonucleoprotein U	sp|Q00839|HNRPU_HUMAN Heterogeneous nuclear ribonucleoprotein U OS=Homo sapiens OX=9606 GN=HNRNPU PE=1 SV=6	28.5959	28.4887	28.3059	28.5698	29.8716	29.2325	29.2755	29.6239
HNRNPUL1	Q9BUJ2	Heterogeneous nuclear ribonucleoprotein U-like protein 1	sp|Q9BUJ2|HNRL1_HUMAN Heterogeneous nuclear ribonucleoprotein U-like protein 1 OS=Homo sapiens OX=9606 GN=HNRNPUL1 PE=1 SV=2	NA	NA	NA	NA	23.0222	22.8838	NA	NA
HNRNPUL2	Q1KMD3	Heterogeneous nuclear ribonucleoprotein U-like protein 2	sp|Q1KMD3|HNRL2_HUMAN Heterogeneous nuclear ribonucleoprotein U-like protein 2 OS=Homo sapiens OX=9606 GN=HNRNPUL2 PE=1 SV=1	25.7535	25.6685	25.7887	26.0647	26.6345	26.5358	26.4329	26.5756
HOMER1	Q86YM7	Homer protein homolog 1	sp|Q86YM7|HOME1_HUMAN Homer protein homolog 1 OS=Homo sapiens OX=9606 GN=HOMER1 PE=1 SV=2	27.7917	28.098	27.6116	27.3908	27.5735	28.6441	28.233	26.2849
HOMER2	Q9NSB8	Homer protein homolog 2	sp|Q9NSB8|HOME2_HUMAN Homer protein homolog 2 OS=Homo sapiens OX=9606 GN=HOMER2 PE=1 SV=1	NA	NA	23.3009	NA	NA	23.5671	23.4913	NA
HOMER3	Q9NSC5	Homer protein homolog 3	sp|Q9NSC5|HOME3_HUMAN Homer protein homolog 3 OS=Homo sapiens OX=9606 GN=HOMER3 PE=1 SV=2	NA	NA	NA	NA	24.6403	24.2027	NA	NA
HOOK3	Q86VS8	Protein Hook homolog 3	sp|Q86VS8|HOOK3_HUMAN Protein Hook homolog 3 OS=Homo sapiens OX=9606 GN=HOOK3 PE=1 SV=2	25.8268	25.8511	25.9786	25.7213	25.8798	25.8966	26.4158	25.1856
HP	P00738	Haptoglobin;Haptoglobin alpha chain;Haptoglobin beta chain	sp|P00738|HPT_HUMAN Haptoglobin OS=Homo sapiens OX=9606 GN=HP PE=1 SV=1	23.1677	23.7175	NA	25.1784	22.9602	26.2053	24.243	NA
HP1BP3	Q5SSJ5	Heterochromatin protein 1-binding protein 3	sp|Q5SSJ5|HP1B3_HUMAN Heterochromatin protein 1-binding protein 3 OS=Homo sapiens OX=9606 GN=HP1BP3 PE=1 SV=1	24.5722	25.5416	25.8788	26.4239	25.6921	24.9338	26.2789	26.6406
HPCA	P84074	Neuron-specific calcium-binding protein hippocalcin	sp|P84074|HPCA_HUMAN Neuron-specific calcium-binding protein hippocalcin OS=Homo sapiens OX=9606 GN=HPCA PE=1 SV=2	22.6537	23.2225	22.9541	23.5048	NA	23.0671	NA	NA
HPCAL1	P37235	Hippocalcin-like protein 1	sp|P37235|HPCL1_HUMAN Hippocalcin-like protein 1 OS=Homo sapiens OX=9606 GN=HPCAL1 PE=1 SV=3	23.8615	23.0956	22.6658	23.8909	NA	23.887	NA	NA
HPCAL4	Q9UM19	Hippocalcin-like protein 4	sp|Q9UM19|HPCL4_HUMAN Hippocalcin-like protein 4 OS=Homo sapiens OX=9606 GN=HPCAL4 PE=1 SV=3	23.8182	24.8944	24.2955	25.4098	NA	25.3422	NA	22.9081
HPRT1	P00492	Hypoxanthine-guanine phosphoribosyltransferase	sp|P00492|HPRT_HUMAN Hypoxanthine-guanine phosphoribosyltransferase OS=Homo sapiens OX=9606 GN=HPRT1 PE=1 SV=2	25.2269	25.9402	25.2199	26.645	23.8021	23.2451	24.3045	23.8695
HRSP12	P52758	Ribonuclease UK114	sp|P52758|RIDA_HUMAN 2-iminobutanoate/2-iminopropanoate deaminase OS=Homo sapiens OX=9606 GN=RIDA PE=1 SV=1	27.0027	26.8927	25.7997	26.9076	NA	NA	NA	22.2219
HS1BP3	Q53T59	HCLS1-binding protein 3	sp|Q53T59|H1BP3_HUMAN HCLS1-binding protein 3 OS=Homo sapiens OX=9606 GN=HS1BP3 PE=1 SV=1	22.4504	23.1161	22.8579	22.5064	23.3268	23.3869	23.7913	23.2651
HSBP1	O75506	Heat shock factor-binding protein 1	sp|O75506|HSBP1_HUMAN Heat shock factor-binding protein 1 OS=Homo sapiens OX=9606 GN=HSBP1 PE=1 SV=1	25.9047	25.3989	25.4926	26.5831	27.1487	26.543	27.1311	26.7599
HSD17B10	Q99714	3-hydroxyacyl-CoA dehydrogenase type-2	sp|Q99714|HCD2_HUMAN 3-hydroxyacyl-CoA dehydrogenase type-2 OS=Homo sapiens OX=9606 GN=HSD17B10 PE=1 SV=3	25.4079	26.3036	26.0255	26.5661	24.5457	24.8061	23.272	23.4176
HSD17B12	Q53GQ0	Very-long-chain 3-oxoacyl-CoA reductase	sp|Q53GQ0|DHB12_HUMAN Very-long-chain 3-oxoacyl-CoA reductase OS=Homo sapiens OX=9606 GN=HSD17B12 PE=1 SV=2	25.915	26.6137	26.0134	26.5161	26.328	26.347	26.0717	25.2709
HSD17B4	P51659	Peroxisomal multifunctional enzyme type 2;(3R)-hydroxyacyl-CoA dehydrogenase;Enoyl-CoA hydratase 2	sp|P51659|DHB4_HUMAN Peroxisomal multifunctional enzyme type 2 OS=Homo sapiens OX=9606 GN=HSD17B4 PE=1 SV=3	27.4002	27.4589	27.2099	27.5108	27.6569	27.1588	27.3261	27.0865
HSD17B8	Q92506	Estradiol 17-beta-dehydrogenase 8	sp|Q92506|DHB8_HUMAN Estradiol 17-beta-dehydrogenase 8 OS=Homo sapiens OX=9606 GN=HSD17B8 PE=1 SV=2	23.5758	23.2217	23.3322	23.9942	NA	NA	NA	NA
HSDL1	Q3SXM5	Inactive hydroxysteroid dehydrogenase-like protein 1	sp|Q3SXM5|HSDL1_HUMAN Inactive hydroxysteroid dehydrogenase-like protein 1 OS=Homo sapiens OX=9606 GN=HSDL1 PE=1 SV=3	24.3071	23.8434	24.0732	24.4474	25.0906	24.3307	23.5168	22.9641
HSDL2	Q6YN16	Hydroxysteroid dehydrogenase-like protein 2	sp|Q6YN16|HSDL2_HUMAN Hydroxysteroid dehydrogenase-like protein 2 OS=Homo sapiens OX=9606 GN=HSDL2 PE=1 SV=1	27.1873	26.9555	27.0099	26.551	25.5476	25.7553	25.6802	25.1206
HSP90AA1	P07900	Heat shock protein HSP 90-alpha	sp|P07900|HS90A_HUMAN Heat shock protein HSP 90-alpha OS=Homo sapiens OX=9606 GN=HSP90AA1 PE=1 SV=5	31.1734	31.1097	31.0456	30.8391	31.4727	31.5752	31.9668	29.6275
HSP90AB1	P08238	Heat shock protein HSP 90-beta	sp|P08238|HS90B_HUMAN Heat shock protein HSP 90-beta OS=Homo sapiens OX=9606 GN=HSP90AB1 PE=1 SV=4	30.1365	29.9005	29.8547	29.9252	30.929	30.87	30.9705	29.7354
HSP90AB2P	Q58FF8	Putative heat shock protein HSP 90-beta 2	sp|Q58FF8|H90B2_HUMAN Putative heat shock protein HSP 90-beta 2 OS=Homo sapiens OX=9606 GN=HSP90AB2P PE=1 SV=2	NA	22.9607	NA	NA	NA	NA	NA	NA
HSP90B1	P14625	Endoplasmin	sp|P14625|ENPL_HUMAN Endoplasmin OS=Homo sapiens OX=9606 GN=HSP90B1 PE=1 SV=1	29.5238	29.4293	29.5227	29.4994	30.0048	29.7333	29.8689	28.7416
HSPA12A	O43301	Heat shock 70 kDa protein 12A	sp|O43301|HS12A_HUMAN Heat shock 70 kDa protein 12A OS=Homo sapiens OX=9606 GN=HSPA12A PE=1 SV=2	30.261	30.5853	30.467	30.4387	30.4743	30.77	31.1846	30.6622
HSPA12B	Q96MM6	Heat shock 70 kDa protein 12B	sp|Q96MM6|HS12B_HUMAN Heat shock 70 kDa protein 12B OS=Homo sapiens OX=9606 GN=HSPA12B PE=1 SV=2	23.1276	23.19	22.6756	23.1147	21.9426	22.1455	23.0022	NA
HSPA13	P48723	Heat shock 70 kDa protein 13	sp|P48723|HSP13_HUMAN Heat shock 70 kDa protein 13 OS=Homo sapiens OX=9606 GN=HSPA13 PE=1 SV=1	23.8581	24.2573	24.1476	23.9273	24.5665	23.6228	21.8667	23.3852
HSPA1B	P0DMV9	Heat shock 70 kDa protein 1B;Heat shock 70 kDa protein 1A	sp|P0DMV9|HS71B_HUMAN Heat shock 70 kDa protein 1B OS=Homo sapiens OX=9606 GN=HSPA1B PE=1 SV=1;sp|P0DMV8|HS71A_HUMAN Heat shock 70 kDa protein 1A OS=Homo sapiens OX=9606 GN=HSPA1A PE=1 SV=1	29.675	29.2801	29.0923	29.0555	29.4798	29.3808	29.6837	28.8428
HSPA2	P54652	Heat shock-related 70 kDa protein 2	sp|P54652|HSP72_HUMAN Heat shock-related 70 kDa protein 2 OS=Homo sapiens OX=9606 GN=HSPA2 PE=1 SV=1	27.4526	27.5251	27.5263	28.4968	26.1364	23.8715	26.6532	24.8805
HSPA4	P34932	Heat shock 70 kDa protein 4	sp|P34932|HSP74_HUMAN Heat shock 70 kDa protein 4 OS=Homo sapiens OX=9606 GN=HSPA4 PE=1 SV=4	28.657	28.933	28.763	28.7212	27.3086	28.094	28.7173	26.7188
HSPA4L	O95757	Heat shock 70 kDa protein 4L	sp|O95757|HS74L_HUMAN Heat shock 70 kDa protein 4L OS=Homo sapiens OX=9606 GN=HSPA4L PE=1 SV=3	27.2409	27.4097	27.1458	27.0908	27.8293	27.6579	27.5116	26.2432
HSPA5	P11021	78 kDa glucose-regulated protein	sp|P11021|BIP_HUMAN Endoplasmic reticulum chaperone BiP OS=Homo sapiens OX=9606 GN=HSPA5 PE=1 SV=2	30.0752	30.1251	30.015	29.7285	31.6847	30.4671	31.0618	30.1755
HSPA6	P17066	Heat shock 70 kDa protein 6;Putative heat shock 70 kDa protein 7	sp|P17066|HSP76_HUMAN Heat shock 70 kDa protein 6 OS=Homo sapiens OX=9606 GN=HSPA6 PE=1 SV=2;sp|P48741|HSP77_HUMAN Putative heat shock 70 kDa protein 7 OS=Homo sapiens OX=9606 GN=HSPA7 PE=5 SV=2	27.6707	27.7371	27.6638	27.9869	26.4148	26.6315	NA	25.0475
HSPA8	P11142	Heat shock cognate 71 kDa protein	sp|P11142|HSP7C_HUMAN Heat shock cognate 71 kDa protein OS=Homo sapiens OX=9606 GN=HSPA8 PE=1 SV=1	31.6687	31.5647	31.5147	31.3777	31.0992	31.2519	32.1007	30.8531
HSPA9	P38646	Stress-70 protein, mitochondrial	sp|P38646|GRP75_HUMAN Stress-70 protein, mitochondrial OS=Homo sapiens OX=9606 GN=HSPA9 PE=1 SV=2	30.9857	30.7735	30.8385	30.9906	31.4753	30.7074	31.7279	30.3363
HSPB1	P04792	Heat shock protein beta-1	sp|P04792|HSPB1_HUMAN Heat shock protein beta-1 OS=Homo sapiens OX=9606 GN=HSPB1 PE=1 SV=2	28.6077	27.4647	27.6229	28.8342	30.3055	27.4676	28.8522	29.1379
HSPB6	O14558	Heat shock protein beta-6	sp|O14558|HSPB6_HUMAN Heat shock protein beta-6 OS=Homo sapiens OX=9606 GN=HSPB6 PE=1 SV=2	NA	NA	NA	21.7389	NA	NA	NA	NA
HSPB8	Q9UJY1	Heat shock protein beta-8	sp|Q9UJY1|HSPB8_HUMAN Heat shock protein beta-8 OS=Homo sapiens OX=9606 GN=HSPB8 PE=1 SV=1	NA	NA	NA	22.2006	NA	22.7395	22.6852	23.5495
HSPBP1	Q9NZL4	Hsp70-binding protein 1	sp|Q9NZL4|HPBP1_HUMAN Hsp70-binding protein 1 OS=Homo sapiens OX=9606 GN=HSPBP1 PE=1 SV=2	NA	22.9459	22.378	NA	NA	22.3259	22.8492	NA
HSPD1	P10809	60 kDa heat shock protein, mitochondrial	sp|P10809|CH60_HUMAN 60 kDa heat shock protein, mitochondrial OS=Homo sapiens OX=9606 GN=HSPD1 PE=1 SV=2	32.5079	32.2364	32.2148	32.2541	30.8459	31.6077	31.5637	31.4377
HSPE1	P61604	10 kDa heat shock protein, mitochondrial	sp|P61604|CH10_HUMAN 10 kDa heat shock protein, mitochondrial OS=Homo sapiens OX=9606 GN=HSPE1 PE=1 SV=2	27.0008	28.2389	28.0253	28.9402	23.8656	22.7762	24.6376	26.2816
HSPG2	P98160	Basement membrane-specific heparan sulfate proteoglycan core protein;Endorepellin;LG3 peptide	sp|P98160|PGBM_HUMAN Basement membrane-specific heparan sulfate proteoglycan core protein OS=Homo sapiens OX=9606 GN=HSPG2 PE=1 SV=4	24.07	25.1301	24.798	25.2194	27.2948	25.4702	25.5226	25.0742
HSPH1	Q92598	Heat shock protein 105 kDa	sp|Q92598|HS105_HUMAN Heat shock protein 105 kDa OS=Homo sapiens OX=9606 GN=HSPH1 PE=1 SV=1	29.0882	29.2723	29.2845	29.0997	28.5319	29.0719	29.0843	27.3546
HTATIP2	Q9BUP3	Oxidoreductase HTATIP2	sp|Q9BUP3|HTAI2_HUMAN Oxidoreductase HTATIP2 OS=Homo sapiens OX=9606 GN=HTATIP2 PE=1 SV=2	NA	NA	NA	22.9353	NA	NA	NA	NA
HTRA2	O43464	Serine protease HTRA2, mitochondrial	sp|O43464|HTRA2_HUMAN Serine protease HTRA2, mitochondrial OS=Homo sapiens OX=9606 GN=HTRA2 PE=1 SV=2	23.9437	23.8695	23.8656	23.2871	23.3329	NA	23.4868	24.0735
HTT	P42858	Huntingtin	sp|P42858|HD_HUMAN Huntingtin OS=Homo sapiens OX=9606 GN=HTT PE=1 SV=2	23.7745	24.0697	23.6561	23.6984	23.7232	23.6288	23.3366	23.6995
HUWE1	Q7Z6Z7	E3 ubiquitin-protein ligase HUWE1	sp|Q7Z6Z7|HUWE1_HUMAN E3 ubiquitin-protein ligase HUWE1 OS=Homo sapiens OX=9606 GN=HUWE1 PE=1 SV=3	26.0203	26.3098	26.2854	26.1776	26.4507	26.4808	26.714	26.1688
HYOU1	Q9Y4L1	Hypoxia up-regulated protein 1	sp|Q9Y4L1|HYOU1_HUMAN Hypoxia up-regulated protein 1 OS=Homo sapiens OX=9606 GN=HYOU1 PE=1 SV=1	28.3748	28.5579	28.4668	28.4056	29.8003	28.7883	29.156	28.6777
IARS	P41252	Isoleucine--tRNA ligase, cytoplasmic	sp|P41252|SYIC_HUMAN Isoleucine--tRNA ligase, cytoplasmic OS=Homo sapiens OX=9606 GN=IARS PE=1 SV=2	25.8275	26.3307	26.4516	26.1187	26.8346	26.3705	26.3805	25.3677
IARS2	Q9NSE4	Isoleucine--tRNA ligase, mitochondrial	sp|Q9NSE4|SYIM_HUMAN Isoleucine--tRNA ligase, mitochondrial OS=Homo sapiens OX=9606 GN=IARS2 PE=1 SV=2	26.6944	26.6687	26.6952	26.457	25.9053	26.8743	27.0203	26.1871
IBA57	Q5T440	Putative transferase CAF17, mitochondrial	sp|Q5T440|CAF17_HUMAN Putative transferase CAF17, mitochondrial OS=Homo sapiens OX=9606 GN=IBA57 PE=1 SV=1	22.6952	NA	NA	22.3097	22.8744	NA	NA	NA
ICA1	Q05084	Islet cell autoantigen 1	sp|Q05084|ICA69_HUMAN Islet cell autoantigen 1 OS=Homo sapiens OX=9606 GN=ICA1 PE=1 SV=2	23.3037	23.5931	23.5715	23.5328	NA	24.1493	24.349	NA
ICA1L	Q8NDH6	Islet cell autoantigen 1-like protein	sp|Q8NDH6|ICA1L_HUMAN Islet cell autoantigen 1-like protein OS=Homo sapiens OX=9606 GN=ICA1L PE=1 SV=1	NA	NA	NA	NA	NA	NA	NA	22.8236
ICAM1	P05362	Intercellular adhesion molecule 1	sp|P05362|ICAM1_HUMAN Intercellular adhesion molecule 1 OS=Homo sapiens OX=9606 GN=ICAM1 PE=1 SV=2	NA	NA	NA	NA	22.607	NA	NA	NA
ICAM5	Q9UMF0	Intercellular adhesion molecule 5	sp|Q9UMF0|ICAM5_HUMAN Intercellular adhesion molecule 5 OS=Homo sapiens OX=9606 GN=ICAM5 PE=1 SV=3	26.7343	26.7061	26.5182	26.4206	27.236	27.3041	28.122	29.5696
IDH1	O75874	Isocitrate dehydrogenase [NADP] cytoplasmic	sp|O75874|IDHC_HUMAN Isocitrate dehydrogenase [NADP] cytoplasmic OS=Homo sapiens OX=9606 GN=IDH1 PE=1 SV=2	22.1317	22.7692	NA	NA	NA	NA	NA	NA
IDH2	P48735	Isocitrate dehydrogenase [NADP], mitochondrial	sp|P48735|IDHP_HUMAN Isocitrate dehydrogenase [NADP], mitochondrial OS=Homo sapiens OX=9606 GN=IDH2 PE=1 SV=2	29.6016	29.5569	29.327	29.4761	28.5811	29.3648	28.8497	28.2468
IDH3A	P50213	Isocitrate dehydrogenase [NAD] subunit alpha, mitochondrial	sp|P50213|IDH3A_HUMAN Isocitrate dehydrogenase [NAD] subunit alpha, mitochondrial OS=Homo sapiens OX=9606 GN=IDH3A PE=1 SV=1	27.3882	28.0708	26.9041	28.208	27.1464	27.1036	27.3988	26.6956
IDH3B	O43837	Isocitrate dehydrogenase [NAD] subunit beta, mitochondrial	sp|O43837|IDH3B_HUMAN Isocitrate dehydrogenase [NAD] subunit beta, mitochondrial OS=Homo sapiens OX=9606 GN=IDH3B PE=1 SV=2	26.7074	26.8663	26.6377	26.7928	25.9419	26.0797	27.0128	25.7581
IDH3G	P51553	Isocitrate dehydrogenase [NAD] subunit gamma, mitochondrial	sp|P51553|IDH3G_HUMAN Isocitrate dehydrogenase [NAD] subunit gamma, mitochondrial OS=Homo sapiens OX=9606 GN=IDH3G PE=1 SV=1	24.6425	24.1884	23.726	24.4305	NA	23.5012	NA	NA
IFI16	Q16666	Gamma-interferon-inducible protein 16	sp|Q16666|IF16_HUMAN Gamma-interferon-inducible protein 16 OS=Homo sapiens OX=9606 GN=IFI16 PE=1 SV=3	NA	NA	NA	23.673	24.2369	NA	NA	NA
IFT27	Q9BW83	Intraflagellar transport protein 27 homolog	sp|Q9BW83|IFT27_HUMAN Intraflagellar transport protein 27 homolog OS=Homo sapiens OX=9606 GN=IFT27 PE=1 SV=1	23.1971	NA	NA	22.7298	23.23	22.9986	23.1552	23.124
IGBP1	P78318	Immunoglobulin-binding protein 1	sp|P78318|IGBP1_HUMAN Immunoglobulin-binding protein 1 OS=Homo sapiens OX=9606 GN=IGBP1 PE=1 SV=1	23.1401	23.3723	23.3768	22.9811	23.6479	23.6381	23.8923	23.9123
IGHA1	P01876	Ig alpha-1 chain C region;Ig alpha-2 chain C region	sp|P01876|IGHA1_HUMAN Immunoglobulin heavy constant alpha 1 OS=Homo sapiens OX=9606 GN=IGHA1 PE=1 SV=2;sp|P0DOX2|IGA2_HUMAN Immunoglobulin alpha-2 heavy chain OS=Homo sapiens OX=9606 PE=1 SV=2;sp|P01877|IGHA2_HUMAN Immunoglobulin heavy constant alpha 2 OS=	23.6984	22.821	NA	23.5167	NA	NA	NA	23.9868
IGHG1	P0DOX5	Ig gamma-1 chain C region	sp|P0DOX5|IGG1_HUMAN Immunoglobulin gamma-1 heavy chain OS=Homo sapiens OX=9606 PE=1 SV=2;sp|P01857|IGHG1_HUMAN Immunoglobulin heavy constant gamma 1 OS=Homo sapiens OX=9606 GN=IGHG1 PE=1 SV=1	24.2665	25.1023	24.2406	25.2061	24.0176	22.9753	24.5867	22.5508
IGHM	P01871	Ig mu chain C region	sp|P01871|IGHM_HUMAN Immunoglobulin heavy constant mu OS=Homo sapiens OX=9606 GN=IGHM PE=1 SV=4;sp|P0DOX6|IGM_HUMAN Immunoglobulin mu heavy chain OS=Homo sapiens OX=9606 PE=1 SV=2	23.639	23.9639	NA	23.5921	NA	NA	NA	NA
IGKC	P01834	Ig kappa chain C region	sp|P01834|IGKC_HUMAN Immunoglobulin kappa constant OS=Homo sapiens OX=9606 GN=IGKC PE=1 SV=2;sp|P0DOX7|IGK_HUMAN Immunoglobulin kappa light chain OS=Homo sapiens OX=9606 PE=1 SV=1	24.5649	25.1128	NA	25.3954	24.4628	22.6744	NA	23.4711
IGLC1	P0DOY3	Ig lambda-1 chain C regions;Ig lambda-6 chain C region;Ig lambda-7 chain C region;Immunoglobulin lambda-like polypeptide 5	sp|P0DOY3|IGLC3_HUMAN Immunoglobulin lambda constant 3 OS=Homo sapiens OX=9606 GN=IGLC3 PE=1 SV=1;sp|P0DOY2|IGLC2_HUMAN Immunoglobulin lambda constant 2 OS=Homo sapiens OX=9606 GN=IGLC2 PE=1 SV=1;sp|P0DOX8|IGL1_HUMAN Immunoglobulin lambda-1 light chain OS=	NA	23.6449	NA	23.4472	NA	NA	NA	NA
IGSF21	Q96ID5	Immunoglobulin superfamily member 21	sp|Q96ID5|IGS21_HUMAN Immunoglobulin superfamily member 21 OS=Homo sapiens OX=9606 GN=IGSF21 PE=2 SV=1	24.6934	24.4216	24.9435	25.0721	24.5543	24.7713	25.4437	24.6854
IGSF8	Q969P0	Immunoglobulin superfamily member 8	sp|Q969P0|IGSF8_HUMAN Immunoglobulin superfamily member 8 OS=Homo sapiens OX=9606 GN=IGSF8 PE=1 SV=1	29.3413	29.3445	29.08	29.3536	29.3749	29.2055	28.3905	30.021
IK	Q13123	Protein Red	sp|Q13123|RED_HUMAN Protein Red OS=Homo sapiens OX=9606 GN=IK PE=1 SV=3	NA	NA	NA	NA	NA	21.5551	21.7005	NA
IKBKAP	O95163	Elongator complex protein 1	sp|O95163|ELP1_HUMAN Elongator complex protein 1 OS=Homo sapiens OX=9606 GN=ELP1 PE=1 SV=3	22.0907	22.19	22.0462	22.1806	22.6091	NA	22.8128	NA
IL1RAPL1	Q9NZN1	Interleukin-1 receptor accessory protein-like 1	sp|Q9NZN1|IRPL1_HUMAN Interleukin-1 receptor accessory protein-like 1 OS=Homo sapiens OX=9606 GN=IL1RAPL1 PE=1 SV=2	NA	22.0628	NA	NA	NA	22.5078	NA	NA
ILDR2	Q71H61	Immunoglobulin-like domain-containing receptor 2	sp|Q71H61|ILDR2_HUMAN Immunoglobulin-like domain-containing receptor 2 OS=Homo sapiens OX=9606 GN=ILDR2 PE=2 SV=1	NA	NA	NA	NA	NA	22.5647	NA	NA
ILF2	Q12905	Interleukin enhancer-binding factor 2	sp|Q12905|ILF2_HUMAN Interleukin enhancer-binding factor 2 OS=Homo sapiens OX=9606 GN=ILF2 PE=1 SV=2	25.5949	26.3037	26.1193	26.4423	24.1774	24.3732	25.022	24.3909
ILF3	Q12906	Interleukin enhancer-binding factor 3	sp|Q12906|ILF3_HUMAN Interleukin enhancer-binding factor 3 OS=Homo sapiens OX=9606 GN=ILF3 PE=1 SV=3	25.388	25.8743	25.8588	26.0657	24.4031	24.3819	25.5212	24.4833
ILK	Q13418	Integrin-linked protein kinase	sp|Q13418|ILK_HUMAN Integrin-linked protein kinase OS=Homo sapiens OX=9606 GN=ILK PE=1 SV=2	25.7239	24.6298	24.4963	24.7104	25.2299	24.7988	25.0259	NA
ILVBL	A1L0T0	Acetolactate synthase-like protein	sp|A1L0T0|ILVBL_HUMAN Acetolactate synthase-like protein OS=Homo sapiens OX=9606 GN=ILVBL PE=1 SV=2	24.8398	25.1476	25.1248	25.2158	25.7523	25.1863	24.9612	25.8906
IMMT	Q16891	MICOS complex subunit MIC60	sp|Q16891|MIC60_HUMAN MICOS complex subunit MIC60 OS=Homo sapiens OX=9606 GN=IMMT PE=1 SV=1	30.2888	29.7843	29.8706	29.8125	30.7456	30.3372	29.8145	30.5083
IMPA1	P29218	Inositol monophosphatase 1	sp|P29218|IMPA1_HUMAN Inositol monophosphatase 1 OS=Homo sapiens OX=9606 GN=IMPA1 PE=1 SV=1	22.8998	NA	NA	23.2298	NA	NA	NA	NA
IMPDH2	P12268	Inosine-5-monophosphate dehydrogenase 2	sp|P12268|IMDH2_HUMAN Inosine-5-monophosphate dehydrogenase 2 OS=Homo sapiens OX=9606 GN=IMPDH2 PE=1 SV=2	23.7331	24.3002	24.3231	24.8993	25.3149	24.1859	24.3456	25.0082
INA	Q16352	Alpha-internexin	sp|Q16352|AINX_HUMAN Alpha-internexin OS=Homo sapiens OX=9606 GN=INA PE=1 SV=2	32.1806	32.3081	32.2035	32.2008	32.8504	32.5717	32.4446	33.2588
INF2	Q27J81	Inverted formin-2	sp|Q27J81|INF2_HUMAN Inverted formin-2 OS=Homo sapiens OX=9606 GN=INF2 PE=1 SV=2	25.218	25.8349	26.1469	25.7199	24.9367	25.7324	26.2063	24.6316
INPP1	P49441	Inositol polyphosphate 1-phosphatase	sp|P49441|INPP_HUMAN Inositol polyphosphate 1-phosphatase OS=Homo sapiens OX=9606 GN=INPP1 PE=1 SV=1	25.1637	25.5489	25.8166	25.6284	NA	24.5562	25.2179	NA
INPP4A	Q96PE3	Type I inositol 3,4-bisphosphate 4-phosphatase	sp|Q96PE3|INP4A_HUMAN Inositol polyphosphate-4-phosphatase type I A OS=Homo sapiens OX=9606 GN=INPP4A PE=1 SV=1	24.3449	24.7708	24.6385	24.554	23.8648	24.9948	25.0641	24.5614
INPP5A	Q14642	Type I inositol 1,4,5-trisphosphate 5-phosphatase	sp|Q14642|I5P1_HUMAN Inositol polyphosphate-5-phosphatase A OS=Homo sapiens OX=9606 GN=INPP5A PE=1 SV=1	24.9501	24.8794	24.5645	24.6673	NA	24.8529	NA	NA
IPO5	O00410	Importin-5	sp|O00410|IPO5_HUMAN Importin-5 OS=Homo sapiens OX=9606 GN=IPO5 PE=1 SV=4	27.2648	27.4849	27.4924	27.3949	26.0997	26.9752	27.2136	24.9826
IPO7	O95373	Importin-7	sp|O95373|IPO7_HUMAN Importin-7 OS=Homo sapiens OX=9606 GN=IPO7 PE=1 SV=1	24.2549	24.8493	24.8356	24.6013	24.7994	24.541	23.6847	23.4934
IPO9	Q96P70	Importin-9	sp|Q96P70|IPO9_HUMAN Importin-9 OS=Homo sapiens OX=9606 GN=IPO9 PE=1 SV=3	23.891	23.9818	24.196	23.9833	24.2898	24.1741	23.6823	NA
IQGAP1	P46940	Ras GTPase-activating-like protein IQGAP1	sp|P46940|IQGA1_HUMAN Ras GTPase-activating-like protein IQGAP1 OS=Homo sapiens OX=9606 GN=IQGAP1 PE=1 SV=1	23.5159	24.6965	24.6718	24.9965	26.0547	23.9305	23.6804	21.789
IQSEC1	Q6DN90	IQ motif and SEC7 domain-containing protein 1	sp|Q6DN90|IQEC1_HUMAN IQ motif and SEC7 domain-containing protein 1 OS=Homo sapiens OX=9606 GN=IQSEC1 PE=1 SV=1	26.5126	26.6783	26.7269	26.6505	26.4144	26.9675	26.8003	27.1026
IQSEC2	Q5JU85	IQ motif and SEC7 domain-containing protein 2	sp|Q5JU85|IQEC2_HUMAN IQ motif and SEC7 domain-containing protein 2 OS=Homo sapiens OX=9606 GN=IQSEC2 PE=1 SV=2	26.5935	26.5622	26.9351	26.2429	25.7488	27.2409	27.2369	26.8559
IQSEC3	Q9UPP2	IQ motif and SEC7 domain-containing protein 3	sp|Q9UPP2|IQEC3_HUMAN IQ motif and SEC7 domain-containing protein 3 OS=Homo sapiens OX=9606 GN=IQSEC3 PE=2 SV=3	22.8311	22.6229	22.726	22.5305	24.0204	23.004	24.0771	23.018
IRGQ	Q8WZA9	Immunity-related GTPase family Q protein	sp|Q8WZA9|IRGQ_HUMAN Immunity-related GTPase family Q protein OS=Homo sapiens OX=9606 GN=IRGQ PE=1 SV=1	25.9501	26.3731	26.6882	26.023	25.629	25.933	27.7653	24.6039
IRS2	Q9Y4H2	Insulin receptor substrate 2	sp|Q9Y4H2|IRS2_HUMAN Insulin receptor substrate 2 OS=Homo sapiens OX=9606 GN=IRS2 PE=1 SV=2	NA	NA	NA	NA	NA	23.5664	24.0812	23.605
ISCA1	Q9BUE6	Iron-sulfur cluster assembly 1 homolog, mitochondrial	sp|Q9BUE6|ISCA1_HUMAN Iron-sulfur cluster assembly 1 homolog, mitochondrial OS=Homo sapiens OX=9606 GN=ISCA1 PE=1 SV=1	23.6331	23.3652	23.3173	23.3485	22.7701	23.7	24.4552	NA
ISCA2	Q86U28	Iron-sulfur cluster assembly 2 homolog, mitochondrial	sp|Q86U28|ISCA2_HUMAN Iron-sulfur cluster assembly 2 homolog, mitochondrial OS=Homo sapiens OX=9606 GN=ISCA2 PE=1 SV=2	NA	23.5114	23.4028	NA	23.8511	24.1459	22.9702	NA
ISOC1	Q96CN7	Isochorismatase domain-containing protein 1	sp|Q96CN7|ISOC1_HUMAN Isochorismatase domain-containing protein 1 OS=Homo sapiens OX=9606 GN=ISOC1 PE=1 SV=3	22.7612	23.3104	NA	23.6165	NA	NA	NA	NA
ISOC2	Q96AB3	Isochorismatase domain-containing protein 2, mitochondrial	sp|Q96AB3|ISOC2_HUMAN Isochorismatase domain-containing protein 2 OS=Homo sapiens OX=9606 GN=ISOC2 PE=1 SV=1	NA	25.9515	24.9204	25.3096	25.1951	25.3595	25.3416	NA
IST1	P53990	IST1 homolog	sp|P53990|IST1_HUMAN IST1 homolog OS=Homo sapiens OX=9606 GN=IST1 PE=1 SV=1	25.6642	25.2814	25.6395	25.4187	24.715	25.2155	26.1047	25.5857
ITCH	Q96J02	E3 ubiquitin-protein ligase Itchy homolog;NEDD4-like E3 ubiquitin-protein ligase WWP1	sp|Q96J02|ITCH_HUMAN E3 ubiquitin-protein ligase Itchy homolog OS=Homo sapiens OX=9606 GN=ITCH PE=1 SV=2;sp|Q9H0M0|WWP1_HUMAN NEDD4-like E3 ubiquitin-protein ligase WWP1 OS=Homo sapiens OX=9606 GN=WWP1 PE=1 SV=1	22.8835	23.3745	23.0057	23.294	23.1191	23.103	NA	NA
ITFG1	Q8TB96	T-cell immunomodulatory protein	sp|Q8TB96|TIP_HUMAN T-cell immunomodulatory protein OS=Homo sapiens OX=9606 GN=ITFG1 PE=1 SV=1	24.0281	23.7658	23.9444	23.9464	24.1364	23.8705	23.7826	24.6962
ITGA7	Q13683	Integrin alpha-7;Integrin alpha-7 heavy chain;Integrin alpha-7 light chain;Integrin alpha-7 70 kDa form	sp|Q13683|ITA7_HUMAN Integrin alpha-7 OS=Homo sapiens OX=9606 GN=ITGA7 PE=1 SV=3	NA	22.567	22.3954	NA	23.3395	NA	NA	24.1986
ITGAV	P06756	Integrin alpha-V;Integrin alpha-V heavy chain;Integrin alpha-V light chain	sp|P06756|ITAV_HUMAN Integrin alpha-V OS=Homo sapiens OX=9606 GN=ITGAV PE=1 SV=2	24.1426	24.1547	24.2422	23.9657	24.8481	23.9538	24.5182	24.0951
ITGB1	P05556	Integrin beta-1	sp|P05556|ITB1_HUMAN Integrin beta-1 OS=Homo sapiens OX=9606 GN=ITGB1 PE=1 SV=2	23.7739	24.2536	24.1795	23.6135	25.7226	24.2013	24.1986	24.2792
ITGB8	P26012	Integrin beta-8	sp|P26012|ITB8_HUMAN Integrin beta-8 OS=Homo sapiens OX=9606 GN=ITGB8 PE=1 SV=1	24.0385	23.5588	24.0189	23.6573	23.5449	23.627	23.9324	24.3658
ITPK1	Q13572	Inositol-tetrakisphosphate 1-kinase	sp|Q13572|ITPK1_HUMAN Inositol-tetrakisphosphate 1-kinase OS=Homo sapiens OX=9606 GN=ITPK1 PE=1 SV=2	NA	22.4903	NA	23.1366	NA	NA	NA	NA
ITPKA	P23677	Inositol-trisphosphate 3-kinase A	sp|P23677|IP3KA_HUMAN Inositol-trisphosphate 3-kinase A OS=Homo sapiens OX=9606 GN=ITPKA PE=1 SV=1	25.4632	27.0527	25.4588	24.8605	24.7097	26.9354	26.5539	26.1945
ITPR1	Q14643	Inositol 1,4,5-trisphosphate receptor type 1	sp|Q14643|ITPR1_HUMAN Inositol 1,4,5-trisphosphate receptor type 1 OS=Homo sapiens OX=9606 GN=ITPR1 PE=1 SV=3	24.5641	25.3266	25.4295	24.9046	24.1063	25.2929	25.0254	25.4583
ITSN2	Q9NZM3	Intersectin-2	sp|Q9NZM3|ITSN2_HUMAN Intersectin-2 OS=Homo sapiens OX=9606 GN=ITSN2 PE=1 SV=3	NA	22.5875	22.3772	21.932	NA	22.8713	22.9875	NA
IVD	P26440	Isovaleryl-CoA dehydrogenase, mitochondrial	sp|P26440|IVD_HUMAN Isovaleryl-CoA dehydrogenase, mitochondrial OS=Homo sapiens OX=9606 GN=IVD PE=1 SV=2	25.8182	25.8379	25.6195	25.6084	24.4387	24.9408	25.3945	25.7697
JAM2	P57087	Junctional adhesion molecule B	sp|P57087|JAM2_HUMAN Junctional adhesion molecule B OS=Homo sapiens OX=9606 GN=JAM2 PE=1 SV=1	23.4544	23.6943	24.2367	23.4274	NA	24.084	23.1858	NA
JAM3	Q9BX67	Junctional adhesion molecule C	sp|Q9BX67|JAM3_HUMAN Junctional adhesion molecule C OS=Homo sapiens OX=9606 GN=JAM3 PE=1 SV=1	23.3498	23.5708	23.7406	23.3822	NA	NA	NA	NA
KALRN	O60229	Kalirin	sp|O60229|KALRN_HUMAN Kalirin OS=Homo sapiens OX=9606 GN=KALRN PE=1 SV=3	23.81	23.8288	23.8807	23.3399	NA	23.7381	23.9756	23.8424
KANK4	Q5T7N3	KN motif and ankyrin repeat domain-containing protein 4	sp|Q5T7N3|KANK4_HUMAN KN motif and ankyrin repeat domain-containing protein 4 OS=Homo sapiens OX=9606 GN=KANK4 PE=1 SV=1	NA	NA	NA	NA	NA	NA	NA	23.0256
KARS	Q15046	Lysine--tRNA ligase	sp|Q15046|SYK_HUMAN Lysine--tRNA ligase OS=Homo sapiens OX=9606 GN=KARS PE=1 SV=3	25.2149	25.1841	25.0892	25.5514	25.8225	26.5639	26.077	25.5535
KATNAL1	Q9BW62	Katanin p60 ATPase-containing subunit A-like 1	sp|Q9BW62|KATL1_HUMAN Katanin p60 ATPase-containing subunit A-like 1 OS=Homo sapiens OX=9606 GN=KATNAL1 PE=1 SV=1	23.5107	23.5285	23.5707	23.3738	NA	23.0926	23.5865	NA
KATNB1	Q9BVA0	Katanin p80 WD40 repeat-containing subunit B1	sp|Q9BVA0|KTNB1_HUMAN Katanin p80 WD40 repeat-containing subunit B1 OS=Homo sapiens OX=9606 GN=KATNB1 PE=1 SV=1	23.4418	NA	NA	23.3403	NA	NA	NA	NA
KAZN	Q674X7	Kazrin	sp|Q674X7|KAZRN_HUMAN Kazrin OS=Homo sapiens OX=9606 GN=KAZN PE=1 SV=2	NA	NA	NA	NA	NA	NA	NA	23.7991
KBTBD11	O94819	Kelch repeat and BTB domain-containing protein 11	sp|O94819|KBTBB_HUMAN Kelch repeat and BTB domain-containing protein 11 OS=Homo sapiens OX=9606 GN=KBTBD11 PE=1 SV=1	28.2028	28.0343	28.0779	27.9085	27.6032	28.019	28.9308	27.7528
KCMF1	Q9P0J7	E3 ubiquitin-protein ligase KCMF1	sp|Q9P0J7|KCMF1_HUMAN E3 ubiquitin-protein ligase KCMF1 OS=Homo sapiens OX=9606 GN=KCMF1 PE=1 SV=2	NA	NA	NA	NA	NA	NA	NA	22.2224
KCNA1	Q09470	Potassium voltage-gated channel subfamily A member 1	sp|Q09470|KCNA1_HUMAN Potassium voltage-gated channel subfamily A member 1 OS=Homo sapiens OX=9606 GN=KCNA1 PE=1 SV=2	22.1832	23.2835	23.7949	23.6336	NA	22.4822	NA	NA
KCNAB2	Q13303	Voltage-gated potassium channel subunit beta-2	sp|Q13303|KCAB2_HUMAN Voltage-gated potassium channel subunit beta-2 OS=Homo sapiens OX=9606 GN=KCNAB2 PE=1 SV=2	26.9534	26.7665	27.1963	27.3701	25.3433	26.5687	26.4357	26.5792
KCND3	Q9UK17	Potassium voltage-gated channel subfamily D member 3	sp|Q9UK17|KCND3_HUMAN Potassium voltage-gated channel subfamily D member 3 OS=Homo sapiens OX=9606 GN=KCND3 PE=1 SV=3	NA	NA	NA	NA	NA	24.1424	NA	NA
KCNJ10	P78508	ATP-sensitive inward rectifier potassium channel 10	sp|P78508|KCJ10_HUMAN ATP-sensitive inward rectifier potassium channel 10 OS=Homo sapiens OX=9606 GN=KCNJ10 PE=1 SV=1	22.5846	22.6722	22.7814	22.2732	NA	NA	NA	22.5628
KCNMA1	Q12791	Calcium-activated potassium channel subunit alpha-1	sp|Q12791|KCMA1_HUMAN Calcium-activated potassium channel subunit alpha-1 OS=Homo sapiens OX=9606 GN=KCNMA1 PE=1 SV=2	23.4339	23.6051	23.8366	23.3055	NA	24.3681	23.8166	23.3691
KCNQ2	O43526	Potassium voltage-gated channel subfamily KQT member 2	sp|O43526|KCNQ2_HUMAN Potassium voltage-gated channel subfamily KQT member 2 OS=Homo sapiens OX=9606 GN=KCNQ2 PE=1 SV=2	23.5902	24.0732	24.2686	23.7133	NA	23.8499	24.2076	24.2531
KCTD12	Q96CX2	BTB/POZ domain-containing protein KCTD12	sp|Q96CX2|KCD12_HUMAN BTB/POZ domain-containing protein KCTD12 OS=Homo sapiens OX=9606 GN=KCTD12 PE=1 SV=1	26.0659	26.212	25.8369	25.8803	25.4503	25.6274	26.6648	25.962
KCTD16	Q68DU8	BTB/POZ domain-containing protein KCTD16	sp|Q68DU8|KCD16_HUMAN BTB/POZ domain-containing protein KCTD16 OS=Homo sapiens OX=9606 GN=KCTD16 PE=1 SV=1	26.7594	26.2383	26.3908	26.2258	25.4037	27.0901	27.035	26.7085
KCTD21	Q4G0X4	BTB/POZ domain-containing protein KCTD21;BTB/POZ domain-containing protein KCTD1	sp|Q4G0X4|KCD21_HUMAN BTB/POZ domain-containing protein KCTD21 OS=Homo sapiens OX=9606 GN=KCTD21 PE=1 SV=1;sp|Q719H9|KCTD1_HUMAN BTB/POZ domain-containing protein KCTD1 OS=Homo sapiens OX=9606 GN=KCTD1 PE=1 SV=1	NA	NA	NA	NA	21.9584	NA	NA	NA
KCTD8	Q6ZWB6	BTB/POZ domain-containing protein KCTD8	sp|Q6ZWB6|KCTD8_HUMAN BTB/POZ domain-containing protein KCTD8 OS=Homo sapiens OX=9606 GN=KCTD8 PE=1 SV=1	23.8179	24.2133	23.9426	23.7095	24.0693	24.4474	24.7907	25.021
KDSR	Q06136	3-ketodihydrosphingosine reductase	sp|Q06136|KDSR_HUMAN 3-ketodihydrosphingosine reductase OS=Homo sapiens OX=9606 GN=KDSR PE=1 SV=1	21.7623	NA	NA	NA	NA	NA	NA	NA
KHDRBS1	Q07666	KH domain-containing, RNA-binding, signal transduction-associated protein 1	sp|Q07666|KHDR1_HUMAN KH domain-containing, RNA-binding, signal transduction-associated protein 1 OS=Homo sapiens OX=9606 GN=KHDRBS1 PE=1 SV=1	25.1118	25.4295	25.4034	25.5292	25.8746	25.8034	24.9115	26.3531
KHDRBS3	O75525	KH domain-containing, RNA-binding, signal transduction-associated protein 3	sp|O75525|KHDR3_HUMAN KH domain-containing, RNA-binding, signal transduction-associated protein 3 OS=Homo sapiens OX=9606 GN=KHDRBS3 PE=1 SV=1	24.9692	25.0666	25.3589	25.2197	25.4079	25.6484	25.8509	25.4914
KHSRP	Q92945	Far upstream element-binding protein 2	sp|Q92945|FUBP2_HUMAN Far upstream element-binding protein 2 OS=Homo sapiens OX=9606 GN=KHSRP PE=1 SV=4	24.0795	24.6641	24.3819	24.992	24.6391	24.0307	24.4331	24.6569
KIAA0196	Q12768	WASH complex subunit strumpellin	sp|Q12768|WASC5_HUMAN WASH complex subunit 5 OS=Homo sapiens OX=9606 GN=WASHC5 PE=1 SV=1	23.016	23.0045	23.2223	23.3999	23.4517	22.8848	NA	NA
KIAA0513	O60268	Uncharacterized protein KIAA0513	sp|O60268|K0513_HUMAN Uncharacterized protein KIAA0513 OS=Homo sapiens OX=9606 GN=KIAA0513 PE=1 SV=1	27.4188	26.9482	26.9658	27.2863	28.0396	28.4843	28.6266	26.5835
KIAA1033	Q2M389	WASH complex subunit 7	sp|Q2M389|WASC4_HUMAN WASH complex subunit 4 OS=Homo sapiens OX=9606 GN=WASHC4 PE=1 SV=2	22.4902	22.467	22.141	22.0738	22.3226	22.2332	NA	NA
KIAA1045	Q9UPV7	Protein KIAA1045	sp|Q9UPV7|PHF24_HUMAN PHD finger protein 24 OS=Homo sapiens OX=9606 GN=PHF24 PE=1 SV=2	29.2196	28.769	28.8147	28.2882	29.5716	29.5483	29.4885	29.2252
KIAA1107	Q9UPP5	Uncharacterized protein KIAA1107	sp|Q9UPP5|K1107_HUMAN AP2-interacting clathrin-endocytosis protein OS=Homo sapiens OX=9606 GN=KIAA1107 PE=1 SV=3	25.6716	25.7202	26.2198	25.2287	24.8537	25.7135	25.4081	25.1315
KIAA1211L	Q6NV74	Uncharacterized protein KIAA1211-like	sp|Q6NV74|K121L_HUMAN Uncharacterized protein KIAA1211-like OS=Homo sapiens OX=9606 GN=KIAA1211L PE=1 SV=3	25.7593	25.0319	25.5612	25.4728	25.2627	26.0405	25.4482	25.5218
KIAA1217	Q5T5P2	Sickle tail protein homolog	sp|Q5T5P2|SKT_HUMAN Sickle tail protein homolog OS=Homo sapiens OX=9606 GN=KIAA1217 PE=1 SV=2	25.4356	24.5697	25.3823	25.4459	26.5767	27.0594	26.7505	27.1253
KIAA1279	Q96EK5	KIF1-binding protein	sp|Q96EK5|KBP_HUMAN KIF1-binding protein OS=Homo sapiens OX=9606 GN=KIF1BP PE=1 SV=1	22.447	NA	NA	23.7612	NA	NA	NA	NA
KIAA1468	Q9P260	LisH domain and HEAT repeat-containing protein KIAA1468	sp|Q9P260|RELCH_HUMAN RAB11-binding protein RELCH OS=Homo sapiens OX=9606 GN=RELCH PE=1 SV=2	25.8711	26.1182	26.0072	25.0074	25.9859	26.707	26.0725	26.4199
KIAA1522	Q9P206	Uncharacterized protein KIAA1522	sp|Q9P206|K1522_HUMAN Uncharacterized protein KIAA1522 OS=Homo sapiens OX=9606 GN=KIAA1522 PE=1 SV=2	NA	NA	NA	NA	23.2413	NA	NA	NA
KIAA1549	Q9HCM3	UPF0606 protein KIAA1549	sp|Q9HCM3|K1549_HUMAN UPF0606 protein KIAA1549 OS=Homo sapiens OX=9606 GN=KIAA1549 PE=1 SV=4	22.7766	22.992	23.202	22.4071	23.5295	23.6079	24.8264	23.4836
KIAA1549L	Q6ZVL6	UPF0606 protein KIAA1549L	sp|Q6ZVL6|K154L_HUMAN UPF0606 protein KIAA1549L OS=Homo sapiens OX=9606 GN=KIAA1549L PE=2 SV=2	25.9835	25.5428	25.4104	25.3874	25.0993	26.2358	26.1016	25.5751
KIAA1598	A0MZ66	Shootin-1	sp|A0MZ66|SHOT1_HUMAN Shootin-1 OS=Homo sapiens OX=9606 GN=SHTN1 PE=1 SV=4	27.1861	27.3663	27.254	27.7367	27.4844	27.7661	28.437	27.775
KIF1A	Q12756	Kinesin-like protein KIF1A	sp|Q12756|KIF1A_HUMAN Kinesin-like protein KIF1A OS=Homo sapiens OX=9606 GN=KIF1A PE=1 SV=2	26.0922	26.4918	26.3419	26.4497	26.5986	25.7858	26.5644	26.0464
KIF21A	Q7Z4S6	Kinesin-like protein KIF21A	sp|Q7Z4S6|KI21A_HUMAN Kinesin-like protein KIF21A OS=Homo sapiens OX=9606 GN=KIF21A PE=1 SV=2	28.0175	28.0457	27.9774	27.9708	28.418	28.1787	28.5376	28.2084
KIF21B	O75037	Kinesin-like protein KIF21B	sp|O75037|KI21B_HUMAN Kinesin-like protein KIF21B OS=Homo sapiens OX=9606 GN=KIF21B PE=1 SV=2	22.6856	22.9271	23.0693	22.6715	NA	NA	24.5271	22.7663
KIF2A	O00139	Kinesin-like protein KIF2A	sp|O00139|KIF2A_HUMAN Kinesin-like protein KIF2A OS=Homo sapiens OX=9606 GN=KIF2A PE=1 SV=3	27.1679	27.3899	27.3353	27.3298	27.3685	27.6704	28.026	27.3751
KIF3A	Q9Y496	Kinesin-like protein KIF3A	sp|Q9Y496|KIF3A_HUMAN Kinesin-like protein KIF3A OS=Homo sapiens OX=9606 GN=KIF3A PE=1 SV=4	25.1342	25.7041	25.6288	25.3841	25.9327	25.3575	25.2377	25.4474
KIF3B	O15066	Kinesin-like protein KIF3B;Kinesin-like protein KIF3B, N-terminally processed	sp|O15066|KIF3B_HUMAN Kinesin-like protein KIF3B OS=Homo sapiens OX=9606 GN=KIF3B PE=1 SV=1	24.3081	24.2252	24.3207	24.2184	24.8264	24.8533	25.4625	25.9558
KIF5A	Q12840	Kinesin heavy chain isoform 5A	sp|Q12840|KIF5A_HUMAN Kinesin heavy chain isoform 5A OS=Homo sapiens OX=9606 GN=KIF5A PE=1 SV=2	24.1347	25.4147	25.538	25.1737	24.9657	25.0009	24.017	NA
KIF5B	P33176	Kinesin-1 heavy chain	sp|P33176|KINH_HUMAN Kinesin-1 heavy chain OS=Homo sapiens OX=9606 GN=KIF5B PE=1 SV=1	26.1504	26.053	25.9619	25.9713	26.1662	26.0922	26.5751	25.4087
KIF5C	O60282	Kinesin heavy chain isoform 5C	sp|O60282|KIF5C_HUMAN Kinesin heavy chain isoform 5C OS=Homo sapiens OX=9606 GN=KIF5C PE=1 SV=1	27.5013	27.7066	27.6045	27.3908	27.1165	27.9619	28.225	26.3696
KIFAP3	Q92845	Kinesin-associated protein 3	sp|Q92845|KIFA3_HUMAN Kinesin-associated protein 3 OS=Homo sapiens OX=9606 GN=KIFAP3 PE=1 SV=2	NA	NA	23.2149	22.8475	NA	23.2132	NA	23.3519
KLC1	Q07866	Kinesin light chain 1	sp|Q07866|KLC1_HUMAN Kinesin light chain 1 OS=Homo sapiens OX=9606 GN=KLC1 PE=1 SV=2	26.2179	26.3978	26.3861	26.3672	25.6447	26.0889	26.5635	25.1497
KLC2	Q9H0B6	Kinesin light chain 2	sp|Q9H0B6|KLC2_HUMAN Kinesin light chain 2 OS=Homo sapiens OX=9606 GN=KLC2 PE=1 SV=1	24.9428	24.5851	24.5523	24.5923	25.2896	25.0455	25.4915	24.9909
KNDC1	Q76NI1	Protein very KIND	sp|Q76NI1|KNDC1_HUMAN Kinase non-catalytic C-lobe domain-containing protein 1 OS=Homo sapiens OX=9606 GN=KNDC1 PE=2 SV=2	NA	22.6575	22.3468	NA	NA	22.1504	NA	23.3911
KPNA1	P52294	Importin subunit alpha-5;Importin subunit alpha-5, N-terminally processed	sp|P52294|IMA5_HUMAN Importin subunit alpha-5 OS=Homo sapiens OX=9606 GN=KPNA1 PE=1 SV=3	23.3809	23.566	23.3663	NA	NA	23.6587	23.1734	24.1147
KPNA3	O00505	Importin subunit alpha-4	sp|O00505|IMA4_HUMAN Importin subunit alpha-4 OS=Homo sapiens OX=9606 GN=KPNA3 PE=1 SV=2	23.3337	23.7787	23.9607	23.7861	NA	23.782	23.9466	NA
KPNA4	O00629	Importin subunit alpha-3	sp|O00629|IMA3_HUMAN Importin subunit alpha-3 OS=Homo sapiens OX=9606 GN=KPNA4 PE=1 SV=1	23.5672	22.5627	22.9618	NA	22.8643	23.3716	NA	23.2763
KPNA6	O60684	Importin subunit alpha-7	sp|O60684|IMA7_HUMAN Importin subunit alpha-7 OS=Homo sapiens OX=9606 GN=KPNA6 PE=1 SV=1	23.3211	23.4443	23.5285	23.7882	24.5334	23.7539	24.0114	23.9059
KPNB1	Q14974	Importin subunit beta-1	sp|Q14974|IMB1_HUMAN Importin subunit beta-1 OS=Homo sapiens OX=9606 GN=KPNB1 PE=1 SV=2	28.6738	28.79	28.6043	28.4714	28.9557	29.0077	29.4577	28.8298
KRT18	P05783	Keratin, type I cytoskeletal 18	sp|P05783|K1C18_HUMAN Keratin, type I cytoskeletal 18 OS=Homo sapiens OX=9606 GN=KRT18 PE=1 SV=2	NA	21.9174	NA	NA	22.1505	21.8471	22.0141	NA
KTN1	Q86UP2	Kinectin	sp|Q86UP2|KTN1_HUMAN Kinectin OS=Homo sapiens OX=9606 GN=KTN1 PE=1 SV=1	25.8284	26.0987	26.1793	26.3582	26.0515	25.9702	26.5713	25.4197
L1CAM	P32004	Neural cell adhesion molecule L1	sp|P32004|L1CAM_HUMAN Neural cell adhesion molecule L1 OS=Homo sapiens OX=9606 GN=L1CAM PE=1 SV=2	28.4978	28.7621	28.4833	28.357	28.1515	29.0047	29.4039	29.4244
L2HGDH	Q9H9P8	L-2-hydroxyglutarate dehydrogenase, mitochondrial	sp|Q9H9P8|L2HDH_HUMAN L-2-hydroxyglutarate dehydrogenase, mitochondrial OS=Homo sapiens OX=9606 GN=L2HGDH PE=1 SV=3	23.2444	23.2001	23.626	23.5823	NA	NA	NA	NA
LACE1	Q8WV93	Lactation elevated protein 1	sp|Q8WV93|AFG1L_HUMAN AFG1-like ATPase OS=Homo sapiens OX=9606 GN=AFG1L PE=1 SV=2	21.9463	NA	NA	NA	22.6041	22.0992	22.6368	NA
LACTB	P83111	Serine beta-lactamase-like protein LACTB, mitochondrial	sp|P83111|LACTB_HUMAN Serine beta-lactamase-like protein LACTB, mitochondrial OS=Homo sapiens OX=9606 GN=LACTB PE=1 SV=2	NA	22.8638	NA	NA	NA	NA	NA	NA
LAMA2	P24043	Laminin subunit alpha-2	sp|P24043|LAMA2_HUMAN Laminin subunit alpha-2 OS=Homo sapiens OX=9606 GN=LAMA2 PE=1 SV=4	NA	25.5546	25.3342	24.9832	NA	25.4461	NA	NA
LAMA5	O15230	Laminin subunit alpha-5	sp|O15230|LAMA5_HUMAN Laminin subunit alpha-5 OS=Homo sapiens OX=9606 GN=LAMA5 PE=1 SV=8	NA	NA	NA	NA	NA	23.1053	NA	23.4858
LAMB2	P55268	Laminin subunit beta-2	sp|P55268|LAMB2_HUMAN Laminin subunit beta-2 OS=Homo sapiens OX=9606 GN=LAMB2 PE=1 SV=2	25.513	25.9998	25.5939	25.8062	26.5561	26.0863	26.705	26.4282
LAMC1	P11047	Laminin subunit gamma-1	sp|P11047|LAMC1_HUMAN Laminin subunit gamma-1 OS=Homo sapiens OX=9606 GN=LAMC1 PE=1 SV=3	24.6718	25.3179	24.9226	25.5478	26.0435	25.47	25.7305	25.5548
LAMP1	P11279	Lysosome-associated membrane glycoprotein 1	sp|P11279|LAMP1_HUMAN Lysosome-associated membrane glycoprotein 1 OS=Homo sapiens OX=9606 GN=LAMP1 PE=1 SV=3	24.126	24.1259	24.1809	24.804	24.8484	23.8744	NA	23.5471
LAMP2	P13473	Lysosome-associated membrane glycoprotein 2	sp|P13473|LAMP2_HUMAN Lysosome-associated membrane glycoprotein 2 OS=Homo sapiens OX=9606 GN=LAMP2 PE=1 SV=2	22.1634	22.0883	NA	22.9232	NA	NA	NA	NA
LAMTOR1	Q6IAA8	Ragulator complex protein LAMTOR1	sp|Q6IAA8|LTOR1_HUMAN Ragulator complex protein LAMTOR1 OS=Homo sapiens OX=9606 GN=LAMTOR1 PE=1 SV=2	24.1101	24.0228	24.1897	23.7545	24.646	24.0368	24.4082	23.7091
LAMTOR2	Q9Y2Q5	Ragulator complex protein LAMTOR2	sp|Q9Y2Q5|LTOR2_HUMAN Ragulator complex protein LAMTOR2 OS=Homo sapiens OX=9606 GN=LAMTOR2 PE=1 SV=1	NA	NA	NA	22.2079	NA	NA	NA	NA
LANCL1	O43813	LanC-like protein 1	sp|O43813|LANC1_HUMAN Glutathione S-transferase LANCL1 OS=Homo sapiens OX=9606 GN=LANCL1 PE=1 SV=1	27.1259	27.2858	27.148	27.1253	26.3222	26.8859	27.2064	26.5278
LANCL2	Q9NS86	LanC-like protein 2	sp|Q9NS86|LANC2_HUMAN LanC-like protein 2 OS=Homo sapiens OX=9606 GN=LANCL2 PE=1 SV=1	24.6975	24.9776	24.7867	25.3207	NA	24.7978	25.0162	24.026
LAP3	P28838	Cytosol aminopeptidase	sp|P28838|AMPL_HUMAN Cytosol aminopeptidase OS=Homo sapiens OX=9606 GN=LAP3 PE=1 SV=3	23.309	24.0683	23.3909	24.6708	25.0004	23.2377	24.2454	24.4566
LARP1	Q6PKG0	La-related protein 1	sp|Q6PKG0|LARP1_HUMAN La-related protein 1 OS=Homo sapiens OX=9606 GN=LARP1 PE=1 SV=2	25.4824	25.2181	25.6245	25.5084	25.8882	25.6026	26.134	25.6566
LARP6	Q9BRS8	La-related protein 6	sp|Q9BRS8|LARP6_HUMAN La-related protein 6 OS=Homo sapiens OX=9606 GN=LARP6 PE=1 SV=1	NA	NA	NA	NA	25.3764	23.0546	NA	25.0106
LARS	Q9P2J5	Leucine--tRNA ligase, cytoplasmic	sp|Q9P2J5|SYLC_HUMAN Leucine--tRNA ligase, cytoplasmic OS=Homo sapiens OX=9606 GN=LARS PE=1 SV=2	25.7471	26.5735	26.7197	26.7029	26.8173	26.9336	26.3576	25.883
LARS2	Q15031	Probable leucine--tRNA ligase, mitochondrial	sp|Q15031|SYLM_HUMAN Probable leucine--tRNA ligase, mitochondrial OS=Homo sapiens OX=9606 GN=LARS2 PE=1 SV=2	24.338	24.0764	23.2419	24.6003	23.318	24.2432	23.8873	24.0752
LASP1	Q14847	LIM and SH3 domain protein 1	sp|Q14847|LASP1_HUMAN LIM and SH3 domain protein 1 OS=Homo sapiens OX=9606 GN=LASP1 PE=1 SV=2	25.2402	25.6616	24.7675	25.707	24.9376	26.6321	26.1834	25.6812
LCMT1	Q9UIC8	Leucine carboxyl methyltransferase 1	sp|Q9UIC8|LCMT1_HUMAN Leucine carboxyl methyltransferase 1 OS=Homo sapiens OX=9606 GN=LCMT1 PE=1 SV=2	22.7812	23.5045	23.0587	23.7954	NA	NA	NA	NA
LCP1	P13796	Plastin-2	sp|P13796|PLSL_HUMAN Plastin-2 OS=Homo sapiens OX=9606 GN=LCP1 PE=1 SV=6	NA	21.7083	NA	NA	24.4057	22.6524	21.0162	21.0657
LDHA	P00338	L-lactate dehydrogenase A chain	sp|P00338|LDHA_HUMAN L-lactate dehydrogenase A chain OS=Homo sapiens OX=9606 GN=LDHA PE=1 SV=2	30.9455	31.089	31.0127	31.1326	29.6194	29.8792	30.7388	29.3286
LDHB	P07195	L-lactate dehydrogenase B chain	sp|P07195|LDHB_HUMAN L-lactate dehydrogenase B chain OS=Homo sapiens OX=9606 GN=LDHB PE=1 SV=2	32.1161	31.9823	32.0559	32.0429	30.5869	31.2732	32.0977	30.5861
LETM1	O95202	LETM1 and EF-hand domain-containing protein 1, mitochondrial	sp|O95202|LETM1_HUMAN Mitochondrial proton/calcium exchanger protein OS=Homo sapiens OX=9606 GN=LETM1 PE=1 SV=1	28.4325	28.423	28.6048	28.3892	28.4479	28.4468	28.377	28.3154
LGALS1	P09382	Galectin-1	sp|P09382|LEG1_HUMAN Galectin-1 OS=Homo sapiens OX=9606 GN=LGALS1 PE=1 SV=2	24.04	24.9796	26.109	28.3127	24.1767	24.2898	NA	23.2616
LGALS3BP	Q08380	Galectin-3-binding protein	sp|Q08380|LG3BP_HUMAN Galectin-3-binding protein OS=Homo sapiens OX=9606 GN=LGALS3BP PE=1 SV=1	22.8751	22.972	NA	23.4279	23.7186	NA	22.5702	NA
LGI1	O95970	Leucine-rich glioma-inactivated protein 1	sp|O95970|LGI1_HUMAN Leucine-rich glioma-inactivated protein 1 OS=Homo sapiens OX=9606 GN=LGI1 PE=1 SV=1	25.4953	26.1098	26.2717	26.4073	23.6791	22.9864	24.6935	25.2113
LGI3	Q8N145	Leucine-rich repeat LGI family member 3	sp|Q8N145|LGI3_HUMAN Leucine-rich repeat LGI family member 3 OS=Homo sapiens OX=9606 GN=LGI3 PE=2 SV=1	23.2549	25.27	25.0647	25.5734	NA	22.3696	NA	NA
LGI4	Q8N135	Leucine-rich repeat LGI family member 4	sp|Q8N135|LGI4_HUMAN Leucine-rich repeat LGI family member 4 OS=Homo sapiens OX=9606 GN=LGI4 PE=1 SV=1	22.1365	22.1016	21.861	22.2183	NA	NA	NA	NA
LHPP	Q9H008	Phospholysine phosphohistidine inorganic pyrophosphate phosphatase	sp|Q9H008|LHPP_HUMAN Phospholysine phosphohistidine inorganic pyrophosphate phosphatase OS=Homo sapiens OX=9606 GN=LHPP PE=1 SV=2	23.9274	23.7321	23.3907	24.767	NA	22.3099	23.0739	NA
LIMCH1	Q9UPQ0	LIM and calponin homology domains-containing protein 1	sp|Q9UPQ0|LIMC1_HUMAN LIM and calponin homology domains-containing protein 1 OS=Homo sapiens OX=9606 GN=LIMCH1 PE=1 SV=4	24.5534	24.7663	25.1412	25.2338	25.1597	25.1625	25.3888	24.9537
LIMK1	P53667	LIM domain kinase 1	sp|P53667|LIMK1_HUMAN LIM domain kinase 1 OS=Homo sapiens OX=9606 GN=LIMK1 PE=1 SV=3	23.0947	22.8703	22.6595	22.5656	23.0938	22.622	NA	NA
LIMS1	P48059	LIM and senescent cell antigen-like-containing domain protein 1	sp|P48059|LIMS1_HUMAN LIM and senescent cell antigen-like-containing domain protein 1 OS=Homo sapiens OX=9606 GN=LIMS1 PE=1 SV=4	NA	NA	22.9281	NA	NA	NA	NA	NA
LIN7A	O14910	Protein lin-7 homolog A	sp|O14910|LIN7A_HUMAN Protein lin-7 homolog A OS=Homo sapiens OX=9606 GN=LIN7A PE=1 SV=2	24.923	24.7709	24.9673	25.4098	25.2569	25.8747	26.129	26.759
LIN7C	Q9NUP9	Protein lin-7 homolog C	sp|Q9NUP9|LIN7C_HUMAN Protein lin-7 homolog C OS=Homo sapiens OX=9606 GN=LIN7C PE=1 SV=1	25.0931	24.7835	25.0775	25.2166	24.5335	24.9152	25.0908	25.6324
LINC00116	Q8NCU8	Uncharacterized protein encoded by LINC00116	sp|Q8NCU8|MTLN_HUMAN Mitoregulin OS=Homo sapiens OX=9606 GN=MTLN PE=1 SV=2	NA	NA	NA	NA	23.1226	21.9699	NA	23.1988
LINGO1	Q96FE5	Leucine-rich repeat and immunoglobulin-like domain-containing nogo receptor-interacting protein 1	sp|Q96FE5|LIGO1_HUMAN Leucine-rich repeat and immunoglobulin-like domain-containing nogo receptor-interacting protein 1 OS=Homo sapiens OX=9606 GN=LINGO1 PE=1 SV=2	25.0498	25.4921	25.2019	24.8771	26.6148	25.3922	25.9485	NA
LIPE	Q05469	Hormone-sensitive lipase	sp|Q05469|LIPS_HUMAN Hormone-sensitive lipase OS=Homo sapiens OX=9606 GN=LIPE PE=1 SV=4	25.1527	23.2966	23.5798	24.2499	24.5788	NA	23.9766	24.8502
LLGL1	Q15334	Lethal(2) giant larvae protein homolog 1	sp|Q15334|L2GL1_HUMAN Lethal(2) giant larvae protein homolog 1 OS=Homo sapiens OX=9606 GN=LLGL1 PE=1 SV=3	25.3205	25.0166	25.1414	25.4385	24.8904	24.808	24.037	25.5089
LMAN1	P49257	Protein ERGIC-53	sp|P49257|LMAN1_HUMAN Protein ERGIC-53 OS=Homo sapiens OX=9606 GN=LMAN1 PE=1 SV=2	23.0269	NA	22.9787	NA	24.3469	23.1397	23.7175	NA
LMBRD2	Q68DH5	LMBR1 domain-containing protein 2	sp|Q68DH5|LMBD2_HUMAN LMBR1 domain-containing protein 2 OS=Homo sapiens OX=9606 GN=LMBRD2 PE=1 SV=1	NA	NA	23.2821	NA	NA	23.1391	21.6441	NA
LMNA	P02545	Prelamin-A/C;Lamin-A/C	sp|P02545|LMNA_HUMAN Prelamin-A/C OS=Homo sapiens OX=9606 GN=LMNA PE=1 SV=1	28.3642	28.4301	28.687	29.1186	29.1397	27.8023	28.9915	29.4408
LMNB1	P20700	Lamin-B1	sp|P20700|LMNB1_HUMAN Lamin-B1 OS=Homo sapiens OX=9606 GN=LMNB1 PE=1 SV=2	25.4901	25.4051	24.7642	25.4708	25.3138	25.8857	26.0917	26.8136
LMNB2	Q03252	Lamin-B2	sp|Q03252|LMNB2_HUMAN Lamin-B2 OS=Homo sapiens OX=9606 GN=LMNB2 PE=1 SV=4	28.8393	28.4263	28.4365	28.6949	28.8548	29.0063	29.369	29.6813
LMO7	Q8WWI1	LIM domain only protein 7	sp|Q8WWI1|LMO7_HUMAN LIM domain only protein 7 OS=Homo sapiens OX=9606 GN=LMO7 PE=1 SV=3	25.7524	25.1286	25.2772	25.2781	24.9325	26.0106	24.4664	25.479
LMTK3	Q96Q04	Serine/threonine-protein kinase LMTK3	sp|Q96Q04|LMTK3_HUMAN Serine/threonine-protein kinase LMTK3 OS=Homo sapiens OX=9606 GN=LMTK3 PE=1 SV=2	NA	22.966	23.0349	22.7033	NA	23.2201	NA	NA
LNP	Q9C0E8	Protein lunapark	sp|Q9C0E8|LNP_HUMAN Endoplasmic reticulum junction formation protein lunapark OS=Homo sapiens OX=9606 GN=LNPK PE=1 SV=2	24.1204	24.2836	24.39	24.2845	24.7807	25.0368	24.8441	24.328
LNPEP	Q9UIQ6	Leucyl-cystinyl aminopeptidase;Leucyl-cystinyl aminopeptidase, pregnancy serum form	sp|Q9UIQ6|LCAP_HUMAN Leucyl-cystinyl aminopeptidase OS=Homo sapiens OX=9606 GN=LNPEP PE=1 SV=3	23.1221	23.3952	23.3452	22.999	23.2239	NA	23.4191	22.7542
LONP1	P36776	Lon protease homolog, mitochondrial	sp|P36776|LONM_HUMAN Lon protease homolog, mitochondrial OS=Homo sapiens OX=9606 GN=LONP1 PE=1 SV=2	27.4972	27.3251	27.4719	27.6956	27.8949	27.6714	27.9996	27.5571
LONRF2	Q1L5Z9	LON peptidase N-terminal domain and RING finger protein 2	sp|Q1L5Z9|LONF2_HUMAN LON peptidase N-terminal domain and RING finger protein 2 OS=Homo sapiens OX=9606 GN=LONRF2 PE=2 SV=3	NA	NA	NA	NA	23.6665	NA	23.9048	23.6264
LPCAT4	Q643R3	Lysophospholipid acyltransferase LPCAT4	sp|Q643R3|LPCT4_HUMAN Lysophospholipid acyltransferase LPCAT4 OS=Homo sapiens OX=9606 GN=LPCAT4 PE=1 SV=1	22.6009	22.6486	22.6819	22.5879	NA	22.9787	NA	22.6818
LPGAT1	Q92604	Acyl-CoA:lysophosphatidylglycerol acyltransferase 1	sp|Q92604|LGAT1_HUMAN Acyl-CoA:lysophosphatidylglycerol acyltransferase 1 OS=Homo sapiens OX=9606 GN=LPGAT1 PE=1 SV=1	NA	NA	NA	NA	NA	22.9442	NA	NA
LPHN1	O94910	Latrophilin-1	sp|O94910|AGRL1_HUMAN Adhesion G protein-coupled receptor L1 OS=Homo sapiens OX=9606 GN=ADGRL1 PE=1 SV=1	24.2789	24.15	24.4268	24.1174	24.8822	25.1363	24.5687	24.3819
LPHN3	Q9HAR2	Latrophilin-3	sp|Q9HAR2|AGRL3_HUMAN Adhesion G protein-coupled receptor L3 OS=Homo sapiens OX=9606 GN=ADGRL3 PE=1 SV=2	24.1965	24.5086	24.5287	24.0121	25.0774	25.0053	25.1761	25.1458
LRP1	Q07954	Prolow-density lipoprotein receptor-related protein 1;Low-density lipoprotein receptor-related protein 1 85 kDa subunit;Low-density lipoprotein receptor-related protein 1 515 kDa subunit;Low-density lipoprotein receptor-related protein 1 intracellular domain	#VALUE!	#VALUE!	#VALUE!	#VALUE!	#VALUE!	#VALUE!	#VALUE!	#VALUE!	#VALUE!
LRPAP1	P30533	Alpha-2-macroglobulin receptor-associated protein	sp|P30533|AMRP_HUMAN Alpha-2-macroglobulin receptor-associated protein OS=Homo sapiens OX=9606 GN=LRPAP1 PE=1 SV=1	24.5864	24.3655	23.8974	24.716	24.6464	24.7081	NA	25.9824
LRPPRC	P42704	Leucine-rich PPR motif-containing protein, mitochondrial	sp|P42704|LPPRC_HUMAN Leucine-rich PPR motif-containing protein, mitochondrial OS=Homo sapiens OX=9606 GN=LRPPRC PE=1 SV=3	28.4948	28.7099	28.6691	28.5496	28.2246	28.6241	28.5553	28.405
LRRC16A	Q5VZK9	Leucine-rich repeat-containing protein 16A	sp|Q5VZK9|CARL1_HUMAN F-actin-uncapping protein LRRC16A OS=Homo sapiens OX=9606 GN=CARMIL1 PE=1 SV=1	22.7691	22.9119	23.2819	23.2524	NA	NA	21.8256	NA
LRRC40	Q9H9A6	Leucine-rich repeat-containing protein 40	sp|Q9H9A6|LRC40_HUMAN Leucine-rich repeat-containing protein 40 OS=Homo sapiens OX=9606 GN=LRRC40 PE=1 SV=1	25.0773	25.373	25.4801	25.0903	24.7966	25.4227	25.7232	25.096
LRRC47	Q8N1G4	Leucine-rich repeat-containing protein 47	sp|Q8N1G4|LRC47_HUMAN Leucine-rich repeat-containing protein 47 OS=Homo sapiens OX=9606 GN=LRRC47 PE=1 SV=1	26.9095	27.024	27.0483	27.0429	26.6391	26.6074	26.9731	27.3304
LRRC57	Q8N9N7	Leucine-rich repeat-containing protein 57	sp|Q8N9N7|LRC57_HUMAN Leucine-rich repeat-containing protein 57 OS=Homo sapiens OX=9606 GN=LRRC57 PE=1 SV=1	24.8218	24.8274	25.1581	25.0461	24.2706	24.553	24.7958	NA
LRRC59	Q96AG4	Leucine-rich repeat-containing protein 59	sp|Q96AG4|LRC59_HUMAN Leucine-rich repeat-containing protein 59 OS=Homo sapiens OX=9606 GN=LRRC59 PE=1 SV=1	25.1495	25.082	25.5567	25.266	26.7873	25.6294	26.1651	24.2626
LRRC7	Q96NW7	Leucine-rich repeat-containing protein 7	sp|Q96NW7|LRRC7_HUMAN Leucine-rich repeat-containing protein 7 OS=Homo sapiens OX=9606 GN=LRRC7 PE=1 SV=1	24.1684	24.307	25.0084	24.246	23.7736	25.9051	25.8372	25.1035
LRRC73	Q5JTD7	Leucine-rich repeat-containing protein 73	sp|Q5JTD7|LRC73_HUMAN Leucine-rich repeat-containing protein 73 OS=Homo sapiens OX=9606 GN=LRRC73 PE=2 SV=1	NA	NA	23.051	NA	NA	NA	NA	NA
LRRC8A	Q8IWT6	Volume-regulated anion channel subunit LRRC8A	sp|Q8IWT6|LRC8A_HUMAN Volume-regulated anion channel subunit LRRC8A OS=Homo sapiens OX=9606 GN=LRRC8A PE=1 SV=1	22.6462	22.9206	23.5369	23.0059	NA	22.0091	NA	NA
LRRFIP1	Q32MZ4	Leucine-rich repeat flightless-interacting protein 1	sp|Q32MZ4|LRRF1_HUMAN Leucine-rich repeat flightless-interacting protein 1 OS=Homo sapiens OX=9606 GN=LRRFIP1 PE=1 SV=2	NA	NA	NA	NA	23.2437	22.6753	NA	NA
LRRFIP2	Q9Y608	Leucine-rich repeat flightless-interacting protein 2	sp|Q9Y608|LRRF2_HUMAN Leucine-rich repeat flightless-interacting protein 2 OS=Homo sapiens OX=9606 GN=LRRFIP2 PE=1 SV=1	NA	NA	NA	22.345	NA	NA	NA	NA
LRRTM4	Q86VH4	Leucine-rich repeat transmembrane neuronal protein 4	sp|Q86VH4|LRRT4_HUMAN Leucine-rich repeat transmembrane neuronal protein 4 OS=Homo sapiens OX=9606 GN=LRRTM4 PE=2 SV=2	NA	22.0015	NA	NA	NA	22.9086	23.2727	22.2321
LRSAM1	Q6UWE0	E3 ubiquitin-protein ligase LRSAM1	sp|Q6UWE0|LRSM1_HUMAN E3 ubiquitin-protein ligase LRSAM1 OS=Homo sapiens OX=9606 GN=LRSAM1 PE=1 SV=1	24.7029	24.2633	24.4073	24.2848	24.6444	25.057	25.0317	24.79
LSAMP	Q13449	Limbic system-associated membrane protein	sp|Q13449|LSAMP_HUMAN Limbic system-associated membrane protein OS=Homo sapiens OX=9606 GN=LSAMP PE=1 SV=2	27.8487	27.7652	27.8567	27.5941	26.8447	27.0845	26.6759	27.4254
LSM14A	Q8ND56	Protein LSM14 homolog A	sp|Q8ND56|LS14A_HUMAN Protein LSM14 homolog A OS=Homo sapiens OX=9606 GN=LSM14A PE=1 SV=3	NA	NA	NA	NA	23.4419	22.3193	NA	24.1548
LSM14B	Q9BX40	Protein LSM14 homolog B	sp|Q9BX40|LS14B_HUMAN Protein LSM14 homolog B OS=Homo sapiens OX=9606 GN=LSM14B PE=1 SV=1	22.9576	22.7279	23.1008	22.7377	23.7777	23.454	23.7493	24.6311
LSM2	Q9Y333	U6 snRNA-associated Sm-like protein LSm2	sp|Q9Y333|LSM2_HUMAN U6 snRNA-associated Sm-like protein LSm2 OS=Homo sapiens OX=9606 GN=LSM2 PE=1 SV=1	NA	NA	NA	23.5813	NA	NA	22.7982	NA
LSM3	P62310	U6 snRNA-associated Sm-like protein LSm3	sp|P62310|LSM3_HUMAN U6 snRNA-associated Sm-like protein LSm3 OS=Homo sapiens OX=9606 GN=LSM3 PE=1 SV=2	NA	NA	NA	23.6211	23.9667	22.9393	NA	23.4658
LTA4H	P09960	Leukotriene A-4 hydrolase	sp|P09960|LKHA4_HUMAN Leukotriene A-4 hydrolase OS=Homo sapiens OX=9606 GN=LTA4H PE=1 SV=2	26.6772	26.5717	26.518	26.6147	26.2604	26.753	26.7269	26.341
LUC7L2	Q9Y383	Putative RNA-binding protein Luc7-like 2	sp|Q9Y383|LC7L2_HUMAN Putative RNA-binding protein Luc7-like 2 OS=Homo sapiens OX=9606 GN=LUC7L2 PE=1 SV=2	NA	NA	NA	23.0778	24.3875	23.2687	23.5919	23.0856
LUC7L3	O95232	Luc7-like protein 3	sp|O95232|LC7L3_HUMAN Luc7-like protein 3 OS=Homo sapiens OX=9606 GN=LUC7L3 PE=1 SV=2	NA	NA	NA	NA	23.4584	NA	NA	NA
LUZP1	Q86V48	Leucine zipper protein 1	sp|Q86V48|LUZP1_HUMAN Leucine zipper protein 1 OS=Homo sapiens OX=9606 GN=LUZP1 PE=1 SV=2	24.1359	23.9676	24.4865	24.2087	23.0366	24.4239	23.6564	NA
LYPLAL1	Q5VWZ2	Lysophospholipase-like protein 1	sp|Q5VWZ2|LYPL1_HUMAN Lysophospholipase-like protein 1 OS=Homo sapiens OX=9606 GN=LYPLAL1 PE=1 SV=3	23.5395	23.0209	22.5988	22.8644	NA	23.7669	NA	23.1542
LYRM1	O43325	LYR motif-containing protein 1	sp|O43325|LYRM1_HUMAN LYR motif-containing protein 1 OS=Homo sapiens OX=9606 GN=LYRM1 PE=2 SV=1	NA	22.6295	22.61	NA	NA	NA	23.2867	NA
LYRM4	Q9HD34	LYR motif-containing protein 4	sp|Q9HD34|LYRM4_HUMAN LYR motif-containing protein 4 OS=Homo sapiens OX=9606 GN=LYRM4 PE=1 SV=1	23.2455	23.5164	24.5424	23.6394	24.3078	22.14	NA	23.2731
LYSMD1	Q96S90	LysM and putative peptidoglycan-binding domain-containing protein 1	sp|Q96S90|LYSM1_HUMAN LysM and putative peptidoglycan-binding domain-containing protein 1 OS=Homo sapiens OX=9606 GN=LYSMD1 PE=1 SV=1	22.5663	22.4891	21.7089	22.3558	22.8825	23.0545	23.6227	22.7511
LZIC	Q8WZA0	Protein LZIC	sp|Q8WZA0|LZIC_HUMAN Protein LZIC OS=Homo sapiens OX=9606 GN=LZIC PE=1 SV=1	23.7706	24.1423	24.4931	24.2513	NA	22.8966	NA	NA
LZTFL1	Q9NQ48	Leucine zipper transcription factor-like protein 1	sp|Q9NQ48|LZTL1_HUMAN Leucine zipper transcription factor-like protein 1 OS=Homo sapiens OX=9606 GN=LZTFL1 PE=1 SV=1	26.4673	26.4959	26.4665	26.3663	25.7197	26.5216	27.0618	25.9229
LZTS1	Q9Y250	Leucine zipper putative tumor suppressor 1	sp|Q9Y250|LZTS1_HUMAN Leucine zipper putative tumor suppressor 1 OS=Homo sapiens OX=9606 GN=LZTS1 PE=1 SV=3	22.3745	22.4035	NA	NA	NA	NA	NA	NA
LZTS3	O60299	Leucine zipper putative tumor suppressor 3	sp|O60299|LZTS3_HUMAN Leucine zipper putative tumor suppressor 3 OS=Homo sapiens OX=9606 GN=LZTS3 PE=2 SV=1	22.6485	22.6373	22.6084	22.2437	NA	23.6369	NA	23.1346
MACF1	Q9UPN3	Microtubule-actin cross-linking factor 1, isoforms 1/2/3/5	sp|Q9UPN3|MACF1_HUMAN Microtubule-actin cross-linking factor 1, isoforms 1/2/3/5 OS=Homo sapiens OX=9606 GN=MACF1 PE=1 SV=4	27.6512	28.1754	27.9048	27.8445	28.5762	28.4374	28.4504	27.9448
MADD	Q8WXG6	MAP kinase-activating death domain protein	sp|Q8WXG6|MADD_HUMAN MAP kinase-activating death domain protein OS=Homo sapiens OX=9606 GN=MADD PE=1 SV=2	27.383	27.5511	27.1475	27.3953	26.4027	27.6342	26.7786	26.6998
MAEA	Q7L5Y9	Macrophage erythroblast attacher	sp|Q7L5Y9|MAEA_HUMAN E3 ubiquitin-protein transferase MAEA OS=Homo sapiens OX=9606 GN=MAEA PE=1 SV=1	NA	NA	NA	NA	NA	NA	18.7943	NA
MAG	P20916	Myelin-associated glycoprotein	sp|P20916|MAG_HUMAN Myelin-associated glycoprotein OS=Homo sapiens OX=9606 GN=MAG PE=1 SV=1	25.9788	26.4003	26.866	26.9375	24.7616	25.0301	24.7746	23.288
MAGED2	Q9UNF1	Melanoma-associated antigen D2	sp|Q9UNF1|MAGD2_HUMAN Melanoma-associated antigen D2 OS=Homo sapiens OX=9606 GN=MAGED2 PE=1 SV=2	23.4524	23.0305	22.9937	22.8779	23.8822	23.6398	NA	NA
MAGI1	Q96QZ7	Membrane-associated guanylate kinase, WW and PDZ domain-containing protein 1	sp|Q96QZ7|MAGI1_HUMAN Membrane-associated guanylate kinase, WW and PDZ domain-containing protein 1 OS=Homo sapiens OX=9606 GN=MAGI1 PE=1 SV=3	NA	23.6751	23.7037	23.4858	NA	24.1163	NA	NA
MAGI2	Q86UL8	Membrane-associated guanylate kinase, WW and PDZ domain-containing protein 2	sp|Q86UL8|MAGI2_HUMAN Membrane-associated guanylate kinase, WW and PDZ domain-containing protein 2 OS=Homo sapiens OX=9606 GN=MAGI2 PE=1 SV=3	24.7316	24.8972	24.4911	25.1754	24.6032	25.4082	25.6653	24.8688
MAGOHB	Q96A72	Protein mago nashi homolog 2;Protein mago nashi homolog	sp|Q96A72|MGN2_HUMAN Protein mago nashi homolog 2 OS=Homo sapiens OX=9606 GN=MAGOHB PE=1 SV=1;sp|P61326|MGN_HUMAN Protein mago nashi homolog OS=Homo sapiens OX=9606 GN=MAGOH PE=1 SV=1	NA	NA	21.312	22.9769	NA	21.4966	NA	NA
MAL2	Q969L2	Protein MAL2	sp|Q969L2|MAL2_HUMAN Protein MAL2 OS=Homo sapiens OX=9606 GN=MAL2 PE=1 SV=1	23.646	23.8601	23.9075	23.8166	NA	23.7531	NA	NA
MAOA	P21397	Amine oxidase [flavin-containing] A	sp|P21397|AOFA_HUMAN Amine oxidase [flavin-containing] A OS=Homo sapiens OX=9606 GN=MAOA PE=1 SV=1	26.2056	25.4576	25.3629	25.1979	25.9316	25.5104	25.2736	25.818
MAOB	P27338	Amine oxidase [flavin-containing] B	sp|P27338|AOFB_HUMAN Amine oxidase [flavin-containing] B OS=Homo sapiens OX=9606 GN=MAOB PE=1 SV=3	28.5837	27.8246	27.6509	27.6005	28.9929	28.4423	28.2164	28.8691
MAP1A	P78559	Microtubule-associated protein 1A;MAP1A heavy chain;MAP1 light chain LC2	sp|P78559|MAP1A_HUMAN Microtubule-associated protein 1A OS=Homo sapiens OX=9606 GN=MAP1A PE=1 SV=6	30.6491	30.8966	31.0368	31.036	28.9862	30.5158	30.6482	29.5175
MAP1B	P46821	Microtubule-associated protein 1B;MAP1B heavy chain;MAP1 light chain LC1	sp|P46821|MAP1B_HUMAN Microtubule-associated protein 1B OS=Homo sapiens OX=9606 GN=MAP1B PE=1 SV=2	32.1838	32.2761	32.4258	32.3765	31.8914	32.1419	32.4607	31.2886
MAP1LC3A	Q9H492	Microtubule-associated proteins 1A/1B light chain 3A	sp|Q9H492|MLP3A_HUMAN Microtubule-associated proteins 1A/1B light chain 3A OS=Homo sapiens OX=9606 GN=MAP1LC3A PE=1 SV=2	23.994	23.5081	NA	NA	NA	24.6761	24.0832	24.2241
MAP1LC3B	Q9GZQ8	Microtubule-associated proteins 1A/1B light chain 3B;Microtubule-associated proteins 1A/1B light chain 3 beta 2	sp|Q9GZQ8|MLP3B_HUMAN Microtubule-associated proteins 1A/1B light chain 3B OS=Homo sapiens OX=9606 GN=MAP1LC3B PE=1 SV=3;sp|A6NCE7|MP3B2_HUMAN Microtubule-associated proteins 1A/1B light chain 3 beta 2 OS=Homo sapiens OX=9606 GN=MAP1LC3B2 PE=2 SV=1	25.056	24.9455	24.5447	24.5575	NA	24.0177	25.0968	23.6696
MAP1S	Q66K74	Microtubule-associated protein 1S;MAP1S heavy chain;MAP1S light chain	sp|Q66K74|MAP1S_HUMAN Microtubule-associated protein 1S OS=Homo sapiens OX=9606 GN=MAP1S PE=1 SV=2	24.2461	24.442	24.6181	24.6761	24.213	23.819	23.8668	23.8293
MAP2	P11137	Microtubule-associated protein 2	sp|P11137|MTAP2_HUMAN Microtubule-associated protein 2 OS=Homo sapiens OX=9606 GN=MAP2 PE=1 SV=4	31.9626	31.9647	32.2805	32.1315	31.4497	32.4787	32.2355	31.2031
MAP2K1	Q02750	Dual specificity mitogen-activated protein kinase kinase 1	sp|Q02750|MP2K1_HUMAN Dual specificity mitogen-activated protein kinase kinase 1 OS=Homo sapiens OX=9606 GN=MAP2K1 PE=1 SV=2	28.2932	28.2994	28.283	28.0574	28.6251	28.3707	29.0669	27.8838
MAP2K2	P36507	Dual specificity mitogen-activated protein kinase kinase 2	sp|P36507|MP2K2_HUMAN Dual specificity mitogen-activated protein kinase kinase 2 OS=Homo sapiens OX=9606 GN=MAP2K2 PE=1 SV=1	26.9127	26.7502	26.6274	26.8421	27.3919	27.0671	28.0639	27.6754
MAP2K4	P45985	Dual specificity mitogen-activated protein kinase kinase 4	sp|P45985|MP2K4_HUMAN Dual specificity mitogen-activated protein kinase kinase 4 OS=Homo sapiens OX=9606 GN=MAP2K4 PE=1 SV=1	25.5986	25.8244	25.2542	25.6944	25.5989	26.3672	26.5427	25.5053
MAP2K6	P52564	Dual specificity mitogen-activated protein kinase kinase 6	sp|P52564|MP2K6_HUMAN Dual specificity mitogen-activated protein kinase kinase 6 OS=Homo sapiens OX=9606 GN=MAP2K6 PE=1 SV=1	NA	23.4157	23.2237	23.4737	23.1352	23.5581	NA	NA
MAP4	P27816	Microtubule-associated protein 4	sp|P27816|MAP4_HUMAN Microtubule-associated protein 4 OS=Homo sapiens OX=9606 GN=MAP4 PE=1 SV=3	27.7715	27.5064	27.9826	28.3388	27.7285	27.5713	27.7287	27.7626
MAP4K3	Q8IVH8	Mitogen-activated protein kinase kinase kinase kinase 3	sp|Q8IVH8|M4K3_HUMAN Mitogen-activated protein kinase kinase kinase kinase 3 OS=Homo sapiens OX=9606 GN=MAP4K3 PE=1 SV=1	NA	NA	NA	NA	NA	22.7838	NA	NA
MAP4K4	O95819	Mitogen-activated protein kinase kinase kinase kinase 4	sp|O95819|M4K4_HUMAN Mitogen-activated protein kinase kinase kinase kinase 4 OS=Homo sapiens OX=9606 GN=MAP4K4 PE=1 SV=2	24.6704	25.0326	24.3931	24.8828	24.7821	24.7464	24.8485	24.8464
MAP6	Q96JE9	Microtubule-associated protein 6	sp|Q96JE9|MAP6_HUMAN Microtubule-associated protein 6 OS=Homo sapiens OX=9606 GN=MAP6 PE=1 SV=2	29.3268	29.5093	29.5713	29.4336	28.4835	28.8351	29.4572	28.556
MAP6D1	Q9H9H5	MAP6 domain-containing protein 1	sp|Q9H9H5|MA6D1_HUMAN MAP6 domain-containing protein 1 OS=Homo sapiens OX=9606 GN=MAP6D1 PE=1 SV=1	24.2793	25.3654	25.4876	25.472	NA	23.8321	23.953	25.0895
MAP7	Q14244	Ensconsin	sp|Q14244|MAP7_HUMAN Ensconsin OS=Homo sapiens OX=9606 GN=MAP7 PE=1 SV=1	NA	NA	22.6787	NA	NA	NA	NA	NA
MAP7D1	Q3KQU3	MAP7 domain-containing protein 1	sp|Q3KQU3|MA7D1_HUMAN MAP7 domain-containing protein 1 OS=Homo sapiens OX=9606 GN=MAP7D1 PE=1 SV=1	25.5727	25.8024	25.7268	26.2541	25.9741	25.4545	25.7794	25.8271
MAP7D2	Q96T17	MAP7 domain-containing protein 2	sp|Q96T17|MA7D2_HUMAN MAP7 domain-containing protein 2 OS=Homo sapiens OX=9606 GN=MAP7D2 PE=1 SV=2	24.1487	23.7984	24.3928	24.2765	23.7441	22.1114	NA	22.3028
MAPK1	P28482	Mitogen-activated protein kinase 1	sp|P28482|MK01_HUMAN Mitogen-activated protein kinase 1 OS=Homo sapiens OX=9606 GN=MAPK1 PE=1 SV=3	28.3546	28.3619	28.2201	27.7208	27.0567	27.4817	28.0201	28.186
MAPK10	P53779	Mitogen-activated protein kinase 10	sp|P53779|MK10_HUMAN Mitogen-activated protein kinase 10 OS=Homo sapiens OX=9606 GN=MAPK10 PE=1 SV=2	24.4103	24.8041	24.6575	24.6721	NA	25.228	25.3957	25.7602
MAPK3	P27361	Mitogen-activated protein kinase 3	sp|P27361|MK03_HUMAN Mitogen-activated protein kinase 3 OS=Homo sapiens OX=9606 GN=MAPK3 PE=1 SV=4	27.6296	27.1437	27.2757	27.4343	27.5992	27.2396	27.0576	27.7796
MAPK8IP3	Q9UPT6	C-Jun-amino-terminal kinase-interacting protein 3	sp|Q9UPT6|JIP3_HUMAN C-Jun-amino-terminal kinase-interacting protein 3 OS=Homo sapiens OX=9606 GN=MAPK8IP3 PE=1 SV=3	25.4075	25.3243	25.2476	25.6041	26.1748	25.0899	25.3321	25.1797
MAPK9	P45984	Mitogen-activated protein kinase 9	sp|P45984|MK09_HUMAN Mitogen-activated protein kinase 9 OS=Homo sapiens OX=9606 GN=MAPK9 PE=1 SV=2	NA	22.5869	23.1711	22.8931	NA	NA	NA	NA
MAPRE1	Q15691	Microtubule-associated protein RP/EB family member 1	sp|Q15691|MARE1_HUMAN Microtubule-associated protein RP/EB family member 1 OS=Homo sapiens OX=9606 GN=MAPRE1 PE=1 SV=3	26.5556	26.8771	27.1825	27.2308	25.9351	25.9145	26.9291	25.3373
MAPRE2	Q15555	Microtubule-associated protein RP/EB family member 2	sp|Q15555|MARE2_HUMAN Microtubule-associated protein RP/EB family member 2 OS=Homo sapiens OX=9606 GN=MAPRE2 PE=1 SV=1	28.4994	28.3977	28.6053	28.3883	28.9275	28.8334	28.9632	29.7273
MAPRE3	Q9UPY8	Microtubule-associated protein RP/EB family member 3	sp|Q9UPY8|MARE3_HUMAN Microtubule-associated protein RP/EB family member 3 OS=Homo sapiens OX=9606 GN=MAPRE3 PE=1 SV=1	28.8708	28.772	28.6801	28.5888	28.4703	28.9978	29.4297	28.704
MAPT	P10636	Microtubule-associated protein tau	sp|P10636|TAU_HUMAN Microtubule-associated protein tau OS=Homo sapiens OX=9606 GN=MAPT PE=1 SV=5	29.5981	29.4452	29.2525	29.247	28.6391	29.2945	29.7514	29.3064
MARCKS	P29966	Myristoylated alanine-rich C-kinase substrate	sp|P29966|MARCS_HUMAN Myristoylated alanine-rich C-kinase substrate OS=Homo sapiens OX=9606 GN=MARCKS PE=1 SV=4	28.2044	28.6489	28.7333	29.7078	27.0404	25.9196	26.3903	26.3634
MARCKSL1	P49006	MARCKS-related protein	sp|P49006|MRP_HUMAN MARCKS-related protein OS=Homo sapiens OX=9606 GN=MARCKSL1 PE=1 SV=2	22.9966	23.9265	23.6166	26.343	23.542	NA	NA	NA
MARK1	Q9P0L2	Serine/threonine-protein kinase MARK1	sp|Q9P0L2|MARK1_HUMAN Serine/threonine-protein kinase MARK1 OS=Homo sapiens OX=9606 GN=MARK1 PE=1 SV=2	23.2699	23.5254	23.8608	23.428	23.8607	23.8604	24.3548	23.3955
MARK2	Q7KZI7	Serine/threonine-protein kinase MARK2	sp|Q7KZI7|MARK2_HUMAN Serine/threonine-protein kinase MARK2 OS=Homo sapiens OX=9606 GN=MARK2 PE=1 SV=2	24.804	24.6252	24.7915	24.8488	25.1048	25.5297	25.2793	25.0677
MARK3	P27448	MAP/microtubule affinity-regulating kinase 3	sp|P27448|MARK3_HUMAN MAP/microtubule affinity-regulating kinase 3 OS=Homo sapiens OX=9606 GN=MARK3 PE=1 SV=5	NA	22.7749	22.8025	22.5908	NA	NA	23.8484	NA
MARK4	Q96L34	MAP/microtubule affinity-regulating kinase 4	sp|Q96L34|MARK4_HUMAN MAP/microtubule affinity-regulating kinase 4 OS=Homo sapiens OX=9606 GN=MARK4 PE=1 SV=1	NA	22.4211	22.1862	22.8409	NA	NA	NA	NA
MARS	P56192	Methionine--tRNA ligase, cytoplasmic	sp|P56192|SYMC_HUMAN Methionine--tRNA ligase, cytoplasmic OS=Homo sapiens OX=9606 GN=MARS PE=1 SV=2	25.6309	26.1394	26.3882	25.9959	26.8701	26.6484	26.7195	25.9347
MAST3	O60307	Microtubule-associated serine/threonine-protein kinase 3	sp|O60307|MAST3_HUMAN Microtubule-associated serine/threonine-protein kinase 3 OS=Homo sapiens OX=9606 GN=MAST3 PE=1 SV=2	23.6387	23.9456	24.4698	23.7037	23.3253	24.5025	24.9459	25.1563
MAT2A	P31153	S-adenosylmethionine synthase isoform type-2	sp|P31153|METK2_HUMAN S-adenosylmethionine synthase isoform type-2 OS=Homo sapiens OX=9606 GN=MAT2A PE=1 SV=1	25.427	25.5982	24.725	25.5655	24.8095	24.4811	25.4428	24.5267
MAT2B	Q9NZL9	Methionine adenosyltransferase 2 subunit beta	sp|Q9NZL9|MAT2B_HUMAN Methionine adenosyltransferase 2 subunit beta OS=Homo sapiens OX=9606 GN=MAT2B PE=1 SV=1	24.655	25.0139	24.4326	25.2255	24.5454	24.1847	24.4608	24.3501
MATR3	P43243	Matrin-3	sp|P43243|MATR3_HUMAN Matrin-3 OS=Homo sapiens OX=9606 GN=MATR3 PE=1 SV=2	27.4714	27.4149	27.4302	27.629	28.0458	27.8848	27.9772	28.3457
MBLAC2	Q68D91	Metallo-beta-lactamase domain-containing protein 2	sp|Q68D91|MBLC2_HUMAN Metallo-beta-lactamase domain-containing protein 2 OS=Homo sapiens OX=9606 GN=MBLAC2 PE=1 SV=3	24.4237	24.4303	24.5051	24.5235	24.5176	24.9042	24.8223	25.4342
MBP	P02686	Myelin basic protein	sp|P02686|MBP_HUMAN Myelin basic protein OS=Homo sapiens OX=9606 GN=MBP PE=1 SV=3	30.864	31.3716	31.5702	32.6477	30.7468	29.0425	30.5901	29.6286
MCCC1	Q96RQ3	Methylcrotonoyl-CoA carboxylase subunit alpha, mitochondrial	sp|Q96RQ3|MCCA_HUMAN Methylcrotonoyl-CoA carboxylase subunit alpha, mitochondrial OS=Homo sapiens OX=9606 GN=MCCC1 PE=1 SV=3	24.9511	25.1503	25.0138	25.2541	24.7974	25.0961	25.2888	25.2904
MCCC2	Q9HCC0	Methylcrotonoyl-CoA carboxylase beta chain, mitochondrial	sp|Q9HCC0|MCCB_HUMAN Methylcrotonoyl-CoA carboxylase beta chain, mitochondrial OS=Homo sapiens OX=9606 GN=MCCC2 PE=1 SV=1	25.7511	25.8957	25.5355	25.7065	NA	24.2489	22.1645	24.1029
MCU	Q8NE86	Calcium uniporter protein, mitochondrial	sp|Q8NE86|MCU_HUMAN Calcium uniporter protein, mitochondrial OS=Homo sapiens OX=9606 GN=MCU PE=1 SV=1	24.1753	24.1228	24.1084	23.8953	24.6426	24.8251	25.4306	24.4156
MDH1	P40925	Malate dehydrogenase, cytoplasmic	sp|P40925|MDHC_HUMAN Malate dehydrogenase, cytoplasmic OS=Homo sapiens OX=9606 GN=MDH1 PE=1 SV=4	31.0679	31.3693	31.0459	31.3157	29.7566	30.0198	30.6732	29.8904
MDH2	P40926	Malate dehydrogenase, mitochondrial	sp|P40926|MDHM_HUMAN Malate dehydrogenase, mitochondrial OS=Homo sapiens OX=9606 GN=MDH2 PE=1 SV=3	31.8072	31.634	31.602	31.8434	32.0283	31.9464	32.0814	32.3008
ME1	P48163	NADP-dependent malic enzyme	sp|P48163|MAOX_HUMAN NADP-dependent malic enzyme OS=Homo sapiens OX=9606 GN=ME1 PE=1 SV=1	26.8925	26.9303	27.048	26.8421	25.9098	26.0206	26.657	25.4458
ME2	P23368	NAD-dependent malic enzyme, mitochondrial	sp|P23368|MAOM_HUMAN NAD-dependent malic enzyme, mitochondrial OS=Homo sapiens OX=9606 GN=ME2 PE=1 SV=1	25.9231	26.173	25.9665	26.1219	25.2365	25.2257	25.5118	24.0319
ME3	Q16798	NADP-dependent malic enzyme, mitochondrial	sp|Q16798|MAON_HUMAN NADP-dependent malic enzyme, mitochondrial OS=Homo sapiens OX=9606 GN=ME3 PE=2 SV=2	27.0763	26.9479	26.9649	26.9833	25.4196	26.4958	26.6995	25.3532
MECP2	P51608	Methyl-CpG-binding protein 2	sp|P51608|MECP2_HUMAN Methyl-CpG-binding protein 2 OS=Homo sapiens OX=9606 GN=MECP2 PE=1 SV=1	24.0216	24.7202	24.992	25.5353	24.8463	23.7006	24.7592	24.2364
METTL7A	Q9H8H3	Methyltransferase-like protein 7A	sp|Q9H8H3|MET7A_HUMAN Methyltransferase-like protein 7A OS=Homo sapiens OX=9606 GN=METTL7A PE=1 SV=1	24.108	23.9353	24.0674	24.432	NA	NA	NA	NA
MFF	Q9GZY8	Mitochondrial fission factor	sp|Q9GZY8|MFF_HUMAN Mitochondrial fission factor OS=Homo sapiens OX=9606 GN=MFF PE=1 SV=1	26.3824	26.2439	26.2989	26.275	27.1153	26.5745	26.6384	26.5061
MFN2	O95140	Mitofusin-2	sp|O95140|MFN2_HUMAN Mitofusin-2 OS=Homo sapiens OX=9606 GN=MFN2 PE=1 SV=3	26.7294	26.4341	26.7236	26.5889	27.048	27.1216	27.1053	26.7767
MFSD6	Q6ZSS7	Major facilitator superfamily domain-containing protein 6	sp|Q6ZSS7|MFSD6_HUMAN Major facilitator superfamily domain-containing protein 6 OS=Homo sapiens OX=9606 GN=MFSD6 PE=1 SV=2	NA	NA	NA	NA	NA	22.6456	NA	NA
MGEA5	O60502	Protein O-GlcNAcase	sp|O60502|OGA_HUMAN Protein O-GlcNAcase OS=Homo sapiens OX=9606 GN=OGA PE=1 SV=2	25.1856	25.0173	24.8536	24.6533	24.37	24.6035	24.6991	24.3863
MGLL	Q99685	Monoglyceride lipase	sp|Q99685|MGLL_HUMAN Monoglyceride lipase OS=Homo sapiens OX=9606 GN=MGLL PE=1 SV=2	24.3035	25.097	24.5939	25.1785	22.428	24.4342	23.7662	NA
MGST1	P10620	Microsomal glutathione S-transferase 1	sp|P10620|MGST1_HUMAN Microsomal glutathione S-transferase 1 OS=Homo sapiens OX=9606 GN=MGST1 PE=1 SV=1	NA	NA	NA	23.4553	24.1742	NA	NA	NA
MGST3	O14880	Microsomal glutathione S-transferase 3	sp|O14880|MGST3_HUMAN Microsomal glutathione S-transferase 3 OS=Homo sapiens OX=9606 GN=MGST3 PE=1 SV=1	24.3633	24.7051	24.479	24.8475	25.6704	25.3167	25.7085	24.2278
MIA3	Q5JRA6	Melanoma inhibitory activity protein 3	sp|Q5JRA6|TGO1_HUMAN Transport and Golgi organization protein 1 homolog OS=Homo sapiens OX=9606 GN=MIA3 PE=1 SV=1	NA	NA	NA	NA	22.9222	NA	NA	NA
MICAL3	Q7RTP6	Protein-methionine sulfoxide oxidase MICAL3	sp|Q7RTP6|MICA3_HUMAN [F-actin]-monooxygenase MICAL3 OS=Homo sapiens OX=9606 GN=MICAL3 PE=1 SV=2	23.9463	24.0757	24.1086	24.1584	24.1352	24.542	24.7068	24.4733
MICU1	Q9BPX6	Calcium uptake protein 1, mitochondrial	sp|Q9BPX6|MICU1_HUMAN Calcium uptake protein 1, mitochondrial OS=Homo sapiens OX=9606 GN=MICU1 PE=1 SV=1	NA	22.4613	NA	NA	NA	22.9914	22.7173	NA
MICU3	Q86XE3	Calcium uptake protein 3, mitochondrial	sp|Q86XE3|MICU3_HUMAN Calcium uptake protein 3, mitochondrial OS=Homo sapiens OX=9606 GN=MICU3 PE=1 SV=1	23.5187	23.6751	23.3546	23.4885	23.3399	23.9484	24.128	23.4176
MIEN1	Q9BRT3	Migration and invasion enhancer 1	sp|Q9BRT3|MIEN1_HUMAN Migration and invasion enhancer 1 OS=Homo sapiens OX=9606 GN=MIEN1 PE=1 SV=1	23.8825	NA	NA	23.1775	23.5451	23.7254	24.251	24.0059
MIF	P14174	Macrophage migration inhibitory factor	sp|P14174|MIF_HUMAN Macrophage migration inhibitory factor OS=Homo sapiens OX=9606 GN=MIF PE=1 SV=4	24.9304	25.2903	24.4392	26.2588	24.6492	24.9924	NA	25.0583
MINK1	Q8N4C8	Misshapen-like kinase 1	sp|Q8N4C8|MINK1_HUMAN Misshapen-like kinase 1 OS=Homo sapiens OX=9606 GN=MINK1 PE=1 SV=2	25.3729	24.7596	25.4209	24.8768	25.259	25.4215	24.4644	25.5968
MINOS1	Q5TGZ0	MICOS complex subunit MIC10	sp|Q5TGZ0|MIC10_HUMAN MICOS complex subunit MIC10 OS=Homo sapiens OX=9606 GN=MICOS10 PE=1 SV=1	24.5046	23.811	23.5017	NA	NA	24.0746	NA	NA
MKL2	Q9ULH7	MKL/myocardin-like protein 2	sp|Q9ULH7|MRTFB_HUMAN Myocardin-related transcription factor B OS=Homo sapiens OX=9606 GN=MRTFB PE=1 SV=3	24.4901	24.0705	24.2199	23.5302	24.4956	25.3977	25.041	25.882
MLC1	Q15049	Membrane protein MLC1	sp|Q15049|MLC1_HUMAN Membrane protein MLC1 OS=Homo sapiens OX=9606 GN=MLC1 PE=1 SV=5	25.2288	24.111	24.8282	25.3844	NA	24.5512	NA	25.4143
MLEC	Q14165	Malectin	sp|Q14165|MLEC_HUMAN Malectin OS=Homo sapiens OX=9606 GN=MLEC PE=1 SV=1	24.8119	24.9279	24.9004	24.4631	25.1992	25.2293	25.4144	25.0831
MLF2	Q15773	Myeloid leukemia factor 2	sp|Q15773|MLF2_HUMAN Myeloid leukemia factor 2 OS=Homo sapiens OX=9606 GN=MLF2 PE=1 SV=1	26.9734	26.4753	26.6611	26.5047	26.8787	26.504	25.9137	27.8178
MLIP	Q5VWP3	Muscular LMNA-interacting protein	sp|Q5VWP3|MLIP_HUMAN Muscular LMNA-interacting protein OS=Homo sapiens OX=9606 GN=MLIP PE=1 SV=3	22.8474	22.4707	22.676	22.3917	23.2253	22.5405	NA	NA
MLLT4	P55196	Afadin	sp|P55196|AFAD_HUMAN Afadin OS=Homo sapiens OX=9606 GN=AFDN PE=1 SV=3	23.9608	24.2442	24.338	24.0728	24.2138	24.4856	25.0357	23.7886
MLYCD	O95822	Malonyl-CoA decarboxylase, mitochondrial	sp|O95822|DCMC_HUMAN Malonyl-CoA decarboxylase, mitochondrial OS=Homo sapiens OX=9606 GN=MLYCD PE=1 SV=3	23.3649	23.6349	22.9721	22.9413	23.0163	23.2143	23.6969	NA
MMAA	Q8IVH4	Methylmalonic aciduria type A protein, mitochondrial	sp|Q8IVH4|MMAA_HUMAN Methylmalonic aciduria type A protein, mitochondrial OS=Homo sapiens OX=9606 GN=MMAA PE=1 SV=1	23.3305	22.6401	22.5782	22.5919	NA	24.1502	24.1888	22.6244
MMAB	Q96EY8	Cob(I)yrinic acid a,c-diamide adenosyltransferase, mitochondrial	sp|Q96EY8|MMAB_HUMAN Corrinoid adenosyltransferase OS=Homo sapiens OX=9606 GN=MMAB PE=1 SV=1	23.4838	23.0973	NA	23.6873	23.8645	24.3287	23.3485	24.0753
MOBP	Q13875	Myelin-associated oligodendrocyte basic protein	sp|Q13875|MOBP_HUMAN Myelin-associated oligodendrocyte basic protein OS=Homo sapiens OX=9606 GN=MOBP PE=1 SV=2	22.7577	23.8402	23.6395	23.5652	24.0325	NA	NA	NA
MOCS1	Q9NZB8	Molybdenum cofactor biosynthesis protein 1;Cyclic pyranopterin monophosphate synthase;Cyclic pyranopterin monophosphate synthase accessory protein	sp|Q9NZB8|MOCS1_HUMAN Molybdenum cofactor biosynthesis protein 1 OS=Homo sapiens OX=9606 GN=MOCS1 PE=1 SV=3	NA	NA	21.9984	22.6564	NA	NA	NA	NA
MOG	Q16653	Myelin-oligodendrocyte glycoprotein	sp|Q16653|MOG_HUMAN Myelin-oligodendrocyte glycoprotein OS=Homo sapiens OX=9606 GN=MOG PE=1 SV=2	26.5499	26.8082	27.043	26.9892	27.3405	25.7308	25.8201	25.4559
MON2	Q7Z3U7	Protein MON2 homolog	sp|Q7Z3U7|MON2_HUMAN Protein MON2 homolog OS=Homo sapiens OX=9606 GN=MON2 PE=1 SV=3	21.8898	22.3354	22.2826	22.1136	NA	22.2468	21.3136	21.4373
MPC1	Q9Y5U8	Mitochondrial pyruvate carrier 1	sp|Q9Y5U8|MPC1_HUMAN Mitochondrial pyruvate carrier 1 OS=Homo sapiens OX=9606 GN=MPC1 PE=1 SV=1	26.5022	25.4559	25.3253	26.1333	27.0647	26.3603	23.9798	25.9611
MPC2	O95563	Mitochondrial pyruvate carrier 2	sp|O95563|MPC2_HUMAN Mitochondrial pyruvate carrier 2 OS=Homo sapiens OX=9606 GN=MPC2 PE=1 SV=1	24.8993	25.0246	24.8265	24.8089	24.8549	25.1693	24.9949	23.5606
MPI	P34949	Mannose-6-phosphate isomerase	sp|P34949|MPI_HUMAN Mannose-6-phosphate isomerase OS=Homo sapiens OX=9606 GN=MPI PE=1 SV=2	24.9586	25.7645	25.5112	25.626	NA	23.7538	23.1715	NA
MPP1	Q00013	55 kDa erythrocyte membrane protein	sp|Q00013|EM55_HUMAN 55 kDa erythrocyte membrane protein OS=Homo sapiens OX=9606 GN=MPP1 PE=1 SV=2	24.5486	25.3715	24.9545	25.0978	25.2276	24.8484	24.5825	25.3452
MPP2	Q14168	MAGUK p55 subfamily member 2	sp|Q14168|MPP2_HUMAN MAGUK p55 subfamily member 2 OS=Homo sapiens OX=9606 GN=MPP2 PE=1 SV=3	26.3217	25.9544	26.2052	25.6737	26.119	26.7279	26.8555	27.479
MPP6	Q9NZW5	MAGUK p55 subfamily member 6	sp|Q9NZW5|MPP6_HUMAN MAGUK p55 subfamily member 6 OS=Homo sapiens OX=9606 GN=MPP6 PE=1 SV=2	25.062	25.2833	25.009	24.9636	25.2094	25.8224	25.7748	25.5197
MPRIP	Q6WCQ1	Myosin phosphatase Rho-interacting protein	sp|Q6WCQ1|MPRIP_HUMAN Myosin phosphatase Rho-interacting protein OS=Homo sapiens OX=9606 GN=MPRIP PE=1 SV=3	23.4294	23.5581	23.4951	23.4925	23.5609	24.0779	25.0703	23.8146
MRAS	O14807	Ras-related protein M-Ras	sp|O14807|RASM_HUMAN Ras-related protein M-Ras OS=Homo sapiens OX=9606 GN=MRAS PE=1 SV=2	25.504	25.0716	25.2529	25.6198	24.6639	24.9198	25.3616	25.1534
MRE11A	P49959	Double-strand break repair protein MRE11A	sp|P49959|MRE11_HUMAN Double-strand break repair protein MRE11 OS=Homo sapiens OX=9606 GN=MRE11 PE=1 SV=3	NA	22.6701	22.2787	NA	22.4776	22.6685	22.7671	22.6855
MROH1	Q8NDA8	Maestro heat-like repeat-containing protein family member 1	sp|Q8NDA8|MROH1_HUMAN Maestro heat-like repeat-containing protein family member 1 OS=Homo sapiens OX=9606 GN=MROH1 PE=2 SV=3	22.5357	22.8549	NA	22.5471	22.2035	21.923	22.3426	22.2466
MRPL1	Q9BYD6	39S ribosomal protein L1, mitochondrial	sp|Q9BYD6|RM01_HUMAN 39S ribosomal protein L1, mitochondrial OS=Homo sapiens OX=9606 GN=MRPL1 PE=1 SV=2	NA	NA	NA	21.5389	NA	NA	NA	NA
MRPL11	Q9Y3B7	39S ribosomal protein L11, mitochondrial	sp|Q9Y3B7|RM11_HUMAN 39S ribosomal protein L11, mitochondrial OS=Homo sapiens OX=9606 GN=MRPL11 PE=1 SV=1	23.3811	23.2404	23.7264	22.8904	NA	22.8446	23.6896	24.1392
MRPL12	P52815	39S ribosomal protein L12, mitochondrial	sp|P52815|RM12_HUMAN 39S ribosomal protein L12, mitochondrial OS=Homo sapiens OX=9606 GN=MRPL12 PE=1 SV=2	25.6001	26.0775	26.2131	25.7007	23.3965	24.3521	25.2166	24.1831
MRPL21	Q7Z2W9	39S ribosomal protein L21, mitochondrial	sp|Q7Z2W9|RM21_HUMAN 39S ribosomal protein L21, mitochondrial OS=Homo sapiens OX=9606 GN=MRPL21 PE=1 SV=2	NA	NA	NA	22.0829	NA	NA	NA	NA
MRPL23	Q16540	39S ribosomal protein L23, mitochondrial	sp|Q16540|RM23_HUMAN 39S ribosomal protein L23, mitochondrial OS=Homo sapiens OX=9606 GN=MRPL23 PE=1 SV=1	23.0169	22.833	22.8918	22.1495	22.5686	NA	22.6509	23.9355
MRPL41	Q8IXM3	39S ribosomal protein L41, mitochondrial	sp|Q8IXM3|RM41_HUMAN 39S ribosomal protein L41, mitochondrial OS=Homo sapiens OX=9606 GN=MRPL41 PE=1 SV=1	NA	22.7479	NA	21.937	NA	NA	NA	22.2977
MRPL45	Q9BRJ2	39S ribosomal protein L45, mitochondrial	sp|Q9BRJ2|RM45_HUMAN 39S ribosomal protein L45, mitochondrial OS=Homo sapiens OX=9606 GN=MRPL45 PE=1 SV=2	22.649	NA	23.1467	22.9734	NA	NA	NA	NA
MRPL49	Q13405	39S ribosomal protein L49, mitochondrial	sp|Q13405|RM49_HUMAN 39S ribosomal protein L49, mitochondrial OS=Homo sapiens OX=9606 GN=MRPL49 PE=1 SV=1	22.9075	23.4974	23.4364	22.7731	NA	NA	22.7724	NA
MRPS22	P82650	28S ribosomal protein S22, mitochondrial	sp|P82650|RT22_HUMAN 28S ribosomal protein S22, mitochondrial OS=Homo sapiens OX=9606 GN=MRPS22 PE=1 SV=1	22.9661	23.1536	22.7592	23.4778	NA	22.6426	NA	23.0283
MRPS23	Q9Y3D9	28S ribosomal protein S23, mitochondrial	sp|Q9Y3D9|RT23_HUMAN 28S ribosomal protein S23, mitochondrial OS=Homo sapiens OX=9606 GN=MRPS23 PE=1 SV=2	NA	22.8936	NA	22.5972	NA	NA	NA	22.6501
MRPS25	P82663	28S ribosomal protein S25, mitochondrial	sp|P82663|RT25_HUMAN 28S ribosomal protein S25, mitochondrial OS=Homo sapiens OX=9606 GN=MRPS25 PE=1 SV=1	NA	23.2799	23.4206	22.6005	20.8373	21.2973	21.5762	NA
MRPS26	Q9BYN8	28S ribosomal protein S26, mitochondrial	sp|Q9BYN8|RT26_HUMAN 28S ribosomal protein S26, mitochondrial OS=Homo sapiens OX=9606 GN=MRPS26 PE=1 SV=1	22.6241	22.7479	22.8571	22.6486	22.6656	22.5237	22.9432	NA
MRPS27	Q92552	28S ribosomal protein S27, mitochondrial	sp|Q92552|RT27_HUMAN 28S ribosomal protein S27, mitochondrial OS=Homo sapiens OX=9606 GN=MRPS27 PE=1 SV=3	23.6778	23.9158	23.8288	23.9094	NA	22.1569	NA	NA
MRPS36	P82909	28S ribosomal protein S36, mitochondrial	sp|P82909|RT36_HUMAN 28S ribosomal protein S36, mitochondrial OS=Homo sapiens OX=9606 GN=MRPS36 PE=1 SV=2	24.0141	24.9739	24.8558	25.0585	NA	NA	NA	NA
MRPS9	P82933	28S ribosomal protein S9, mitochondrial	sp|P82933|RT09_HUMAN 28S ribosomal protein S9, mitochondrial OS=Homo sapiens OX=9606 GN=MRPS9 PE=1 SV=2	NA	23.0408	22.4853	NA	NA	NA	NA	NA
MSI2	Q96DH6	RNA-binding protein Musashi homolog 2	sp|Q96DH6|MSI2H_HUMAN RNA-binding protein Musashi homolog 2 OS=Homo sapiens OX=9606 GN=MSI2 PE=1 SV=1	NA	24.2266	23.9474	NA	24.3833	NA	23.9075	NA
MSN	P26038	Moesin	sp|P26038|MOES_HUMAN Moesin OS=Homo sapiens OX=9606 GN=MSN PE=1 SV=3	26.1669	26.2904	25.5516	26.5386	26.3596	24.9106	25.5995	24.8624
MTARC2	Q969Z3	Mitochondrial amidoxime reducing component 2	sp|Q969Z3|MARC2_HUMAN Mitochondrial amidoxime reducing component 2 OS=Homo sapiens OX=9606 GN=MARC2 PE=1 SV=1	23.4677	22.4444	NA	23.0994	NA	NA	22.7014	NA
MTCH1	Q9NZJ7	Mitochondrial carrier homolog 1	sp|Q9NZJ7|MTCH1_HUMAN Mitochondrial carrier homolog 1 OS=Homo sapiens OX=9606 GN=MTCH1 PE=1 SV=1	26.5956	26.5122	26.5942	26.3399	25.96	26.2504	25.8547	26.9657
MTCH2	Q9Y6C9	Mitochondrial carrier homolog 2	sp|Q9Y6C9|MTCH2_HUMAN Mitochondrial carrier homolog 2 OS=Homo sapiens OX=9606 GN=MTCH2 PE=1 SV=1	27.3116	27.1882	27.0942	26.7309	27.514	27.6885	27.4016	27.0225
MT-CO2	P00403	Cytochrome c oxidase subunit 2	sp|P00403|COX2_HUMAN Cytochrome c oxidase subunit 2 OS=Homo sapiens OX=9606 GN=MT-CO2 PE=1 SV=1	28.0859	28.6342	28.5573	28.4741	28.0553	28.1269	28.3388	27.6053
MTDH	Q86UE4	Protein LYRIC	sp|Q86UE4|LYRIC_HUMAN Protein LYRIC OS=Homo sapiens OX=9606 GN=MTDH PE=1 SV=2	23.6532	23.7394	24.0087	23.9071	24.8336	23.9809	NA	NA
MTFR1L	Q9H019	Mitochondrial fission regulator 1-like	sp|Q9H019|MFR1L_HUMAN Mitochondrial fission regulator 1-like OS=Homo sapiens OX=9606 GN=MTFR1L PE=1 SV=2	23.597	22.761	23.0492	23.9844	24.705	24.0469	24.7757	25.1386
MTHFD1	P11586	C-1-tetrahydrofolate synthase, cytoplasmic;Methylenetetrahydrofolate dehydrogenase;Methenyltetrahydrofolate cyclohydrolase;Formyltetrahydrofolate synthetase;C-1-tetrahydrofolate synthase, cytoplasmic, N-terminally processed	sp|P11586|C1TC_HUMAN C-1-tetrahydrofolate synthase, cytoplasmic OS=Homo sapiens OX=9606 GN=MTHFD1 PE=1 SV=3	27.6515	27.6579	27.5659	27.765	27.6358	27.872	28.0737	28.4036
MTHFD1L	Q6UB35	Monofunctional C1-tetrahydrofolate synthase, mitochondrial	sp|Q6UB35|C1TM_HUMAN Monofunctional C1-tetrahydrofolate synthase, mitochondrial OS=Homo sapiens OX=9606 GN=MTHFD1L PE=1 SV=1	NA	NA	NA	NA	23.377	22.5467	NA	NA
MTM1	Q13496	Myotubularin	sp|Q13496|MTM1_HUMAN Myotubularin OS=Homo sapiens OX=9606 GN=MTM1 PE=1 SV=2	22.7798	NA	NA	NA	NA	NA	NA	NA
MTMR2	Q13614	Myotubularin-related protein 2	sp|Q13614|MTMR2_HUMAN Myotubularin-related protein 2 OS=Homo sapiens OX=9606 GN=MTMR2 PE=1 SV=4	23.4481	23.5717	23.7085	23.4819	NA	22.4869	NA	22.725
MTMR9	Q96QG7	Myotubularin-related protein 9	sp|Q96QG7|MTMR9_HUMAN Myotubularin-related protein 9 OS=Homo sapiens OX=9606 GN=MTMR9 PE=1 SV=1	NA	NA	NA	NA	25.0827	24.1827	23.3321	24.1948
MT-ND1	P03886	NADH-ubiquinone oxidoreductase chain 1	sp|P03886|NU1M_HUMAN NADH-ubiquinone oxidoreductase chain 1 OS=Homo sapiens OX=9606 GN=MT-ND1 PE=1 SV=1	24.1781	24.5664	24.6779	24.6779	NA	24.1234	NA	NA
MT-ND5	P03915	NADH-ubiquinone oxidoreductase chain 5	sp|P03915|NU5M_HUMAN NADH-ubiquinone oxidoreductase chain 5 OS=Homo sapiens OX=9606 GN=MT-ND5 PE=1 SV=2	23.886	24.3379	24.3691	24.249	23.5388	23.8328	23.8276	NA
MTOR	P42345	Serine/threonine-protein kinase mTOR	sp|P42345|MTOR_HUMAN Serine/threonine-protein kinase mTOR OS=Homo sapiens OX=9606 GN=MTOR PE=1 SV=1	23.4974	23.4296	23.3396	23.2432	23.5024	23.706	23.459	24.0193
MTPN	P58546	Myotrophin	sp|P58546|MTPN_HUMAN Myotrophin OS=Homo sapiens OX=9606 GN=MTPN PE=1 SV=2	26.2368	27.0783	27.0802	25.7825	25.3056	26.8168	27.2662	26.2474
MTSS1L	Q765P7	MTSS1-like protein	sp|Q765P7|MTSS2_HUMAN Protein MTSS 2 OS=Homo sapiens OX=9606 GN=MTSS2 PE=1 SV=1	24.4928	NA	NA	NA	NA	24.3135	NA	NA
MTX1	Q13505	Metaxin-1	sp|Q13505|MTX1_HUMAN Metaxin-1 OS=Homo sapiens OX=9606 GN=MTX1 PE=1 SV=3	25.1066	25.4483	24.6852	25.2209	25.2114	25.5581	25.8967	24.4165
MTX2	O75431	Metaxin-2	sp|O75431|MTX2_HUMAN Metaxin-2 OS=Homo sapiens OX=9606 GN=MTX2 PE=1 SV=1	23.9166	24.2359	24.3728	24.4061	23.4806	NA	NA	NA
MTX3	Q5HYI7	Metaxin-3	sp|Q5HYI7|MTX3_HUMAN Metaxin-3 OS=Homo sapiens OX=9606 GN=MTX3 PE=1 SV=2	24.1332	23.8028	24.1291	23.9275	24.047	24.3237	24.6952	NA
MUT	P22033	Methylmalonyl-CoA mutase, mitochondrial	sp|P22033|MUTA_HUMAN Methylmalonyl-CoA mutase, mitochondrial OS=Homo sapiens OX=9606 GN=MMUT PE=1 SV=4	25.5472	25.6924	25.4505	25.7683	24.9038	26.4274	25.3633	25.1732
MVB12B	Q9H7P6	Multivesicular body subunit 12B	sp|Q9H7P6|MB12B_HUMAN Multivesicular body subunit 12B OS=Homo sapiens OX=9606 GN=MVB12B PE=1 SV=2	NA	NA	NA	NA	NA	NA	21.8278	NA
MVD	P53602	Diphosphomevalonate decarboxylase	sp|P53602|MVD1_HUMAN Diphosphomevalonate decarboxylase OS=Homo sapiens OX=9606 GN=MVD PE=1 SV=1	NA	23.6166	23.5025	24.1871	24.3905	24.3341	25.093	NA
MVP	Q14764	Major vault protein	sp|Q14764|MVP_HUMAN Major vault protein OS=Homo sapiens OX=9606 GN=MVP PE=1 SV=4	24.6849	25.9248	25.8627	26.963	27.6222	22.5927	25.2168	NA
MX1	P20591	Interferon-induced GTP-binding protein Mx1;Interferon-induced GTP-binding protein Mx1, N-terminally processed	sp|P20591|MX1_HUMAN Interferon-induced GTP-binding protein Mx1 OS=Homo sapiens OX=9606 GN=MX1 PE=1 SV=4	NA	NA	NA	22.3207	NA	NA	NA	NA
MXRA7	P84157	Matrix-remodeling-associated protein 7	sp|P84157|MXRA7_HUMAN Matrix-remodeling-associated protein 7 OS=Homo sapiens OX=9606 GN=MXRA7 PE=1 SV=1	22.8669	23.9095	23.9936	25.2319	NA	22.8738	NA	NA
MYADM	Q96S97	Myeloid-associated differentiation marker	sp|Q96S97|MYADM_HUMAN Myeloid-associated differentiation marker OS=Homo sapiens OX=9606 GN=MYADM PE=1 SV=2	24.804	24.7382	24.9862	24.8823	25.9033	25.6299	22.9531	25.5756
MYEF2	Q9P2K5	Myelin expression factor 2	sp|Q9P2K5|MYEF2_HUMAN Myelin expression factor 2 OS=Homo sapiens OX=9606 GN=MYEF2 PE=1 SV=3	25.0439	25.3987	25.3324	25.5085	26.5449	26.4644	26.772	26.3863
MYH1	P12882	Myosin-1;Myosin-8;Myosin-4;Myosin-2	sp|P12882|MYH1_HUMAN Myosin-1 OS=Homo sapiens OX=9606 GN=MYH1 PE=1 SV=3;sp|P13535|MYH8_HUMAN Myosin-8 OS=Homo sapiens OX=9606 GN=MYH8 PE=1 SV=3;sp|Q9Y623|MYH4_HUMAN Myosin-4 OS=Homo sapiens OX=9606 GN=MYH4 PE=2 SV=2;sp|Q9UKX2|MYH2_HUMAN Myosin-2 OS=Homo sa	NA	NA	NA	NA	NA	NA	NA	24.5502
MYH10	P35580	Myosin-10	sp|P35580|MYH10_HUMAN Myosin-10 OS=Homo sapiens OX=9606 GN=MYH10 PE=1 SV=3	29.9283	30.1386	30.1785	29.9492	30.0057	30.7201	31.0539	30.3588
MYH11	P35749	Myosin-11	sp|P35749|MYH11_HUMAN Myosin-11 OS=Homo sapiens OX=9606 GN=MYH11 PE=1 SV=3	NA	NA	NA	23.454	23.6046	21.9111	23.2594	NA
MYH14	Q7Z406	Myosin-14	sp|Q7Z406|MYH14_HUMAN Myosin-14 OS=Homo sapiens OX=9606 GN=MYH14 PE=1 SV=2	26.4529	26.5873	26.3397	26.3275	26.3251	26.0177	25.7484	25.7456
MYH15	Q9Y2K3	Myosin-15	sp|Q9Y2K3|MYH15_HUMAN Myosin-15 OS=Homo sapiens OX=9606 GN=MYH15 PE=1 SV=5	NA	NA	NA	NA	24.1355	NA	24.5275	23.4376
MYH9	P35579	Myosin-9	sp|P35579|MYH9_HUMAN Myosin-9 OS=Homo sapiens OX=9606 GN=MYH9 PE=1 SV=4	28.8615	29.1384	29.2021	29.064	30.2519	29.7924	30.1331	29.2265
MYL12A	P19105	Myosin regulatory light chain 12A;Myosin regulatory light chain 12B	sp|P19105|ML12A_HUMAN Myosin regulatory light chain 12A OS=Homo sapiens OX=9606 GN=MYL12A PE=1 SV=2;sp|O14950|ML12B_HUMAN Myosin regulatory light chain 12B OS=Homo sapiens OX=9606 GN=MYL12B PE=1 SV=2	26.4218	26.7652	26.6417	26.695	26.3508	26.4285	26.9316	26.6411
MYL6	P60660	Myosin light polypeptide 6	sp|P60660|MYL6_HUMAN Myosin light polypeptide 6 OS=Homo sapiens OX=9606 GN=MYL6 PE=1 SV=2	26.3576	26.7218	26.5102	27.0743	26.7175	26.7737	27.1196	26.4667
MYL6B	P14649	Myosin light chain 6B	sp|P14649|MYL6B_HUMAN Myosin light chain 6B OS=Homo sapiens OX=9606 GN=MYL6B PE=1 SV=1	NA	23.0589	23.4545	23.2447	NA	NA	NA	NA
MYLK	Q15746	Myosin light chain kinase, smooth muscle;Myosin light chain kinase, smooth muscle, deglutamylated form	sp|Q15746|MYLK_HUMAN Myosin light chain kinase, smooth muscle OS=Homo sapiens OX=9606 GN=MYLK PE=1 SV=4	25.0283	25.1153	25.0975	25.1152	26.0566	25.689	26.1277	25.3661
MYO18A	Q92614	Unconventional myosin-XVIIIa	sp|Q92614|MY18A_HUMAN Unconventional myosin-XVIIIa OS=Homo sapiens OX=9606 GN=MYO18A PE=1 SV=3	26.902	27.1575	27.3112	27.0392	27.4041	27.6647	27.5661	27.5364
MYO1B	O43795	Unconventional myosin-Ib	sp|O43795|MYO1B_HUMAN Unconventional myosin-Ib OS=Homo sapiens OX=9606 GN=MYO1B PE=1 SV=3	23.5077	24.5	24.367	24.0647	25.0307	25.1019	25.5699	24.0736
MYO1C	O00159	Unconventional myosin-Ic	sp|O00159|MYO1C_HUMAN Unconventional myosin-Ic OS=Homo sapiens OX=9606 GN=MYO1C PE=1 SV=4	NA	23.5826	24.1224	23.6955	24.9311	23.6082	23.9486	NA
MYO1D	O94832	Unconventional myosin-Id	sp|O94832|MYO1D_HUMAN Unconventional myosin-Id OS=Homo sapiens OX=9606 GN=MYO1D PE=1 SV=2	24.8028	25.536	25.8769	26.2235	25.5511	24.817	23.2046	22.7348
MYO1E	Q12965	Unconventional myosin-Ie	sp|Q12965|MYO1E_HUMAN Unconventional myosin-Ie OS=Homo sapiens OX=9606 GN=MYO1E PE=1 SV=2	22.8658	NA	22.6086	23.3048	NA	NA	21.9204	NA
MYO5A	Q9Y4I1	Unconventional myosin-Va	sp|Q9Y4I1|MYO5A_HUMAN Unconventional myosin-Va OS=Homo sapiens OX=9606 GN=MYO5A PE=1 SV=2	29.5334	29.6959	29.6949	29.5824	29.8202	30.4337	30.386	30.4381
MYO6	Q9UM54	Unconventional myosin-VI	sp|Q9UM54|MYO6_HUMAN Unconventional myosin-VI OS=Homo sapiens OX=9606 GN=MYO6 PE=1 SV=4	24.8839	24.5157	25.3155	25.1747	22.1676	23.3307	23.5588	23.5122
NAA10	P41227	N-alpha-acetyltransferase 10;N-alpha-acetyltransferase 11	sp|P41227|NAA10_HUMAN N-alpha-acetyltransferase 10 OS=Homo sapiens OX=9606 GN=NAA10 PE=1 SV=1;sp|Q9BSU3|NAA11_HUMAN N-alpha-acetyltransferase 11 OS=Homo sapiens OX=9606 GN=NAA11 PE=1 SV=3	NA	22.8592	22.7661	23.0434	NA	22.3035	22.8297	NA
NAA15	Q9BXJ9	N-alpha-acetyltransferase 15, NatA auxiliary subunit	sp|Q9BXJ9|NAA15_HUMAN N-alpha-acetyltransferase 15, NatA auxiliary subunit OS=Homo sapiens OX=9606 GN=NAA15 PE=1 SV=1	23.6645	24.1104	24.0667	23.4303	24.1499	24.2112	24.8711	NA
NAA50	Q9GZZ1	N-alpha-acetyltransferase 50	sp|Q9GZZ1|NAA50_HUMAN N-alpha-acetyltransferase 50 OS=Homo sapiens OX=9606 GN=NAA50 PE=1 SV=1	NA	NA	NA	21.996	NA	21.7518	21.7046	NA
NACA	E9PAV3	Nascent polypeptide-associated complex subunit alpha, muscle-specific form;Nascent polypeptide-associated complex subunit alpha	sp|E9PAV3|NACAM_HUMAN Nascent polypeptide-associated complex subunit alpha, muscle-specific form OS=Homo sapiens OX=9606 GN=NACA PE=1 SV=1;sp|Q13765|NACA_HUMAN Nascent polypeptide-associated complex subunit alpha OS=Homo sapiens OX=9606 GN=NACA PE=1 SV=1	25.071	25.2267	25.3842	26.3175	24.7905	23.8396	24.9752	24.4751
NACAD	O15069	NAC-alpha domain-containing protein 1	sp|O15069|NACAD_HUMAN NAC-alpha domain-containing protein 1 OS=Homo sapiens OX=9606 GN=NACAD PE=1 SV=3	NA	22.9827	22.89	22.76	NA	NA	NA	NA
NADK2	Q4G0N4	NAD kinase 2, mitochondrial	sp|Q4G0N4|NAKD2_HUMAN NAD kinase 2, mitochondrial OS=Homo sapiens OX=9606 GN=NADK2 PE=1 SV=2	23.5852	24.1956	23.6058	24.6973	23.6664	NA	NA	NA
NAE1	Q13564	NEDD8-activating enzyme E1 regulatory subunit	sp|Q13564|ULA1_HUMAN NEDD8-activating enzyme E1 regulatory subunit OS=Homo sapiens OX=9606 GN=NAE1 PE=1 SV=1	24.4709	24.749	24.5694	24.5984	23.3867	24.3061	24.8658	23.0924
NAGK	Q9UJ70	N-acetyl-D-glucosamine kinase	sp|Q9UJ70|NAGK_HUMAN N-acetyl-D-glucosamine kinase OS=Homo sapiens OX=9606 GN=NAGK PE=1 SV=4	24.9911	24.9723	24.7453	25.6781	24.235	24.8843	24.4649	23.4563
NAMPT	P43490	Nicotinamide phosphoribosyltransferase	sp|P43490|NAMPT_HUMAN Nicotinamide phosphoribosyltransferase OS=Homo sapiens OX=9606 GN=NAMPT PE=1 SV=1	25.3397	25.9306	24.7694	25.4572	28.9969	26.5938	27.1581	26.96
NANS	Q9NR45	Sialic acid synthase	sp|Q9NR45|SIAS_HUMAN Sialic acid synthase OS=Homo sapiens OX=9606 GN=NANS PE=1 SV=2	23.8393	24.2771	23.8413	23.9939	24.1522	24.2485	24.2423	NA
NAP1L1	P55209	Nucleosome assembly protein 1-like 1	sp|P55209|NP1L1_HUMAN Nucleosome assembly protein 1-like 1 OS=Homo sapiens OX=9606 GN=NAP1L1 PE=1 SV=1	26.6604	26.8453	27.0481	26.83	26.3221	27.0213	27.6257	26.6699
NAP1L4	Q99733	Nucleosome assembly protein 1-like 4	sp|Q99733|NP1L4_HUMAN Nucleosome assembly protein 1-like 4 OS=Homo sapiens OX=9606 GN=NAP1L4 PE=1 SV=1	27.451	27.4222	27.3266	27.5927	26.8704	27.2801	27.4847	26.9715
NAP1L5	Q96NT1	Nucleosome assembly protein 1-like 5	sp|Q96NT1|NP1L5_HUMAN Nucleosome assembly protein 1-like 5 OS=Homo sapiens OX=9606 GN=NAP1L5 PE=1 SV=1	24.8239	23.8122	23.9927	24.066	NA	24.4683	24.7808	23.792
NAPA	P54920	Alpha-soluble NSF attachment protein	sp|P54920|SNAA_HUMAN Alpha-soluble NSF attachment protein OS=Homo sapiens OX=9606 GN=NAPA PE=1 SV=3	28.1065	28.5743	28.6162	28.5169	27.3211	28.0093	28.0413	28.2818
NAPB	Q9H115	Beta-soluble NSF attachment protein	sp|Q9H115|SNAB_HUMAN Beta-soluble NSF attachment protein OS=Homo sapiens OX=9606 GN=NAPB PE=1 SV=2	29.6691	29.4769	29.6677	29.4902	28.3165	29.4523	29.4063	29.325
NAPEPLD	Q6IQ20	N-acyl-phosphatidylethanolamine-hydrolyzing phospholipase D	sp|Q6IQ20|NAPEP_HUMAN N-acyl-phosphatidylethanolamine-hydrolyzing phospholipase D OS=Homo sapiens OX=9606 GN=NAPEPLD PE=1 SV=2	23.0907	23.0049	23.6039	23.0878	NA	NA	NA	NA
NAPG	Q99747	Gamma-soluble NSF attachment protein	sp|Q99747|SNAG_HUMAN Gamma-soluble NSF attachment protein OS=Homo sapiens OX=9606 GN=NAPG PE=1 SV=1	28.5643	28.6104	28.5773	28.6484	26.8267	27.4285	28.2316	28.0002
NAPRT	Q6XQN6	Nicotinate phosphoribosyltransferase	sp|Q6XQN6|PNCB_HUMAN Nicotinate phosphoribosyltransferase OS=Homo sapiens OX=9606 GN=NAPRT PE=1 SV=2	NA	22.8366	22.9794	22.7779	NA	NA	NA	NA
NARS	O43776	Asparagine--tRNA ligase, cytoplasmic	sp|O43776|SYNC_HUMAN Asparagine--tRNA ligase, cytoplasmic OS=Homo sapiens OX=9606 GN=NARS PE=1 SV=1	25.4433	26.1534	26.2467	26.1342	23.6815	24.0479	23.4056	24.0606
NASP	P49321	Nuclear autoantigenic sperm protein	sp|P49321|NASP_HUMAN Nuclear autoantigenic sperm protein OS=Homo sapiens OX=9606 GN=NASP PE=1 SV=2	21.9196	21.8836	NA	NA	NA	22.2026	NA	NA
NAV1	Q8NEY1	Neuron navigator 1	sp|Q8NEY1|NAV1_HUMAN Neuron navigator 1 OS=Homo sapiens OX=9606 GN=NAV1 PE=1 SV=2	NA	NA	22.0206	NA	22.9814	22.657	23.0714	22.8835
NBAS	A2RRP1	Neuroblastoma-amplified sequence	sp|A2RRP1|NBAS_HUMAN Neuroblastoma-amplified sequence OS=Homo sapiens OX=9606 GN=NBAS PE=1 SV=2	22.3155	22.6015	22.3915	22.1903	22.8175	22.1915	22.9576	NA
NBEA	Q8NFP9	Neurobeachin	sp|Q8NFP9|NBEA_HUMAN Neurobeachin OS=Homo sapiens OX=9606 GN=NBEA PE=1 SV=3	25.7187	25.9851	26.3548	26.0222	26.314	27.2714	26.7433	25.9587
NCALD	P61601	Neurocalcin-delta	sp|P61601|NCALD_HUMAN Neurocalcin-delta OS=Homo sapiens OX=9606 GN=NCALD PE=1 SV=2	25.2525	25.191	25.1419	26.1221	23.7995	25.3542	23.0952	23.5904
NCAM1	P13591	Neural cell adhesion molecule 1	sp|P13591|NCAM1_HUMAN Neural cell adhesion molecule 1 OS=Homo sapiens OX=9606 GN=NCAM1 PE=1 SV=3	30.7759	30.9401	30.9401	30.7748	30.8591	30.9798	30.816	30.7405
NCAM2	O15394	Neural cell adhesion molecule 2	sp|O15394|NCAM2_HUMAN Neural cell adhesion molecule 2 OS=Homo sapiens OX=9606 GN=NCAM2 PE=1 SV=2	27.9169	28.2723	28.602	28.0238	28.0851	28.8226	28.5114	28.6652
NCAN	O14594	Neurocan core protein	sp|O14594|NCAN_HUMAN Neurocan core protein OS=Homo sapiens OX=9606 GN=NCAN PE=1 SV=3	27.5574	28.1414	27.9641	27.8188	27.5519	28.0442	29.5941	28.7395
NCDN	Q9UBB6	Neurochondrin	sp|Q9UBB6|NCDN_HUMAN Neurochondrin OS=Homo sapiens OX=9606 GN=NCDN PE=1 SV=1	28.5013	28.4986	28.5396	28.4412	27.2202	28.332	28.2093	27.7257
NCEH1	Q6PIU2	Neutral cholesterol ester hydrolase 1	sp|Q6PIU2|NCEH1_HUMAN Neutral cholesterol ester hydrolase 1 OS=Homo sapiens OX=9606 GN=NCEH1 PE=1 SV=3	27.9216	27.8953	27.5281	27.4514	28	28.257	27.8455	28.6491
NCK1	P16333	Cytoplasmic protein NCK1	sp|P16333|NCK1_HUMAN Cytoplasmic protein NCK1 OS=Homo sapiens OX=9606 GN=NCK1 PE=1 SV=1	NA	NA	NA	NA	NA	NA	23.2057	NA
NCK2	O43639	Cytoplasmic protein NCK2	sp|O43639|NCK2_HUMAN Cytoplasmic protein NCK2 OS=Homo sapiens OX=9606 GN=NCK2 PE=1 SV=2	23.9496	24.1151	23.6667	23.7399	24.2065	24.4335	25.0496	23.8982
NCKAP1	Q9Y2A7	Nck-associated protein 1	sp|Q9Y2A7|NCKP1_HUMAN Nck-associated protein 1 OS=Homo sapiens OX=9606 GN=NCKAP1 PE=1 SV=1	28.5269	28.7243	28.7471	28.3633	27.3033	28.709	28.6439	27.6214
NCKIPSD	Q9NZQ3	NCK-interacting protein with SH3 domain	sp|Q9NZQ3|SPN90_HUMAN NCK-interacting protein with SH3 domain OS=Homo sapiens OX=9606 GN=NCKIPSD PE=1 SV=1	25.655	25.2065	24.7584	25.5038	25.7245	25.4572	23.6277	26.2285
NCL	P19338	Nucleolin	sp|P19338|NUCL_HUMAN Nucleolin OS=Homo sapiens OX=9606 GN=NCL PE=1 SV=3	28.4789	28.5596	28.4767	28.8034	29.4274	29.2428	29.4842	29.5963
NCLN	Q969V3	Nicalin	sp|Q969V3|NCLN_HUMAN Nicalin OS=Homo sapiens OX=9606 GN=NCLN PE=1 SV=2	23.2044	23.1595	23.1964	22.9992	23.6714	23.5343	23.5659	23.5222
NCOA7	Q8NI08	Nuclear receptor coactivator 7	sp|Q8NI08|NCOA7_HUMAN Nuclear receptor coactivator 7 OS=Homo sapiens OX=9606 GN=NCOA7 PE=1 SV=2	26.2326	25.8979	26.1384	26.2489	25.4945	26.154	26.371	25.6861
NCS1	P62166	Neuronal calcium sensor 1	sp|P62166|NCS1_HUMAN Neuronal calcium sensor 1 OS=Homo sapiens OX=9606 GN=NCS1 PE=1 SV=2	25.3142	24.8419	24.581	25.8272	24.2788	24.849	23.9259	23.9086
NCSTN	Q92542	Nicastrin	sp|Q92542|NICA_HUMAN Nicastrin OS=Homo sapiens OX=9606 GN=NCSTN PE=1 SV=2	22.511	22.6565	22.6487	22.2677	23.0762	NA	NA	NA
NDEL1	Q9GZM8	Nuclear distribution protein nudE-like 1	sp|Q9GZM8|NDEL1_HUMAN Nuclear distribution protein nudE-like 1 OS=Homo sapiens OX=9606 GN=NDEL1 PE=1 SV=1	23.342	23.4321	23.296	23.4699	23.0959	23.4283	23.5103	24.2397
NDRG1	Q92597	Protein NDRG1	sp|Q92597|NDRG1_HUMAN Protein NDRG1 OS=Homo sapiens OX=9606 GN=NDRG1 PE=1 SV=1	26.8277	26.9199	27.0945	27.0724	26.0496	26.1593	26.7882	26.8693
NDRG2	Q9UN36	Protein NDRG2	sp|Q9UN36|NDRG2_HUMAN Protein NDRG2 OS=Homo sapiens OX=9606 GN=NDRG2 PE=1 SV=2	29.2573	29.2509	29.4291	29.4646	25.8335	27.0249	27.5565	28.0223
NDRG3	Q9UGV2	Protein NDRG3	sp|Q9UGV2|NDRG3_HUMAN Protein NDRG3 OS=Homo sapiens OX=9606 GN=NDRG3 PE=1 SV=2	25.2339	25.5889	25.5648	25.2656	24.1598	25.1902	25.5782	25.055
NDRG4	Q9ULP0	Protein NDRG4	sp|Q9ULP0|NDRG4_HUMAN Protein NDRG4 OS=Homo sapiens OX=9606 GN=NDRG4 PE=1 SV=2	26.9927	26.6444	26.3976	26.7542	25.3221	26.2125	26.42	26.2885
NDUFA1	O15239	NADH dehydrogenase [ubiquinone] 1 alpha subcomplex subunit 1	sp|O15239|NDUA1_HUMAN NADH dehydrogenase [ubiquinone] 1 alpha subcomplex subunit 1 OS=Homo sapiens OX=9606 GN=NDUFA1 PE=1 SV=1	25.1812	24.334	24.2936	23.7857	24.7621	24.4315	NA	24.947
NDUFA10	O95299	NADH dehydrogenase [ubiquinone] 1 alpha subcomplex subunit 10, mitochondrial	sp|O95299|NDUAA_HUMAN NADH dehydrogenase [ubiquinone] 1 alpha subcomplex subunit 10, mitochondrial OS=Homo sapiens OX=9606 GN=NDUFA10 PE=1 SV=1	28.163	28.1321	28.1613	28.1462	27.2724	27.9384	28.3277	26.6427
NDUFA11	Q86Y39	NADH dehydrogenase [ubiquinone] 1 alpha subcomplex subunit 11	sp|Q86Y39|NDUAB_HUMAN NADH dehydrogenase [ubiquinone] 1 alpha subcomplex subunit 11 OS=Homo sapiens OX=9606 GN=NDUFA11 PE=1 SV=3	26.429	26.7236	26.4542	26.6058	25.8305	25.823	25.092	24.9606
NDUFA12	Q9UI09	NADH dehydrogenase [ubiquinone] 1 alpha subcomplex subunit 12	sp|Q9UI09|NDUAC_HUMAN NADH dehydrogenase [ubiquinone] 1 alpha subcomplex subunit 12 OS=Homo sapiens OX=9606 GN=NDUFA12 PE=1 SV=1	26.7613	26.8291	27.0447	27.2652	25.9422	25.8392	26.3192	26.086
NDUFA13	Q9P0J0	NADH dehydrogenase [ubiquinone] 1 alpha subcomplex subunit 13	sp|Q9P0J0|NDUAD_HUMAN NADH dehydrogenase [ubiquinone] 1 alpha subcomplex subunit 13 OS=Homo sapiens OX=9606 GN=NDUFA13 PE=1 SV=3	28.4677	28.3232	28.3566	28.0055	28.7632	28.7444	29.2467	29.1828
NDUFA2	O43678	NADH dehydrogenase [ubiquinone] 1 alpha subcomplex subunit 2	sp|O43678|NDUA2_HUMAN NADH dehydrogenase [ubiquinone] 1 alpha subcomplex subunit 2 OS=Homo sapiens OX=9606 GN=NDUFA2 PE=1 SV=3	26.2326	26.9343	27.1845	27.1625	25.7745	25.5967	26.0238	26.8271
NDUFA4	O00483	Cytochrome c oxidase subunit NDUFA4	sp|O00483|NDUA4_HUMAN Cytochrome c oxidase subunit NDUFA4 OS=Homo sapiens OX=9606 GN=NDUFA4 PE=1 SV=1	28.4839	28.1662	28.2539	27.9286	28.0984	28.5116	27.6821	27.5985
NDUFA5	Q16718	NADH dehydrogenase [ubiquinone] 1 alpha subcomplex subunit 5	sp|Q16718|NDUA5_HUMAN NADH dehydrogenase [ubiquinone] 1 alpha subcomplex subunit 5 OS=Homo sapiens OX=9606 GN=NDUFA5 PE=1 SV=3	26.9505	26.9395	27.5146	27.6349	24.9886	24.9638	26.3107	27.3581
NDUFA6	P56556	NADH dehydrogenase [ubiquinone] 1 alpha subcomplex subunit 6	sp|P56556|NDUA6_HUMAN NADH dehydrogenase [ubiquinone] 1 alpha subcomplex subunit 6 OS=Homo sapiens OX=9606 GN=NDUFA6 PE=1 SV=4	27.6348	27.748	27.8857	27.2674	26.7491	26.7265	26.861	25.6554
NDUFA7	O95182	NADH dehydrogenase [ubiquinone] 1 alpha subcomplex subunit 7	sp|O95182|NDUA7_HUMAN NADH dehydrogenase [ubiquinone] 1 alpha subcomplex subunit 7 OS=Homo sapiens OX=9606 GN=NDUFA7 PE=1 SV=3	26.3987	26.3435	26.0668	25.209	25.2049	25.0553	24.8546	26.0959
NDUFA8	P51970	NADH dehydrogenase [ubiquinone] 1 alpha subcomplex subunit 8	sp|P51970|NDUA8_HUMAN NADH dehydrogenase [ubiquinone] 1 alpha subcomplex subunit 8 OS=Homo sapiens OX=9606 GN=NDUFA8 PE=1 SV=3	26.2549	26.5952	27.168	27.1079	25.7259	25.6816	26.7586	26.1022
NDUFA9	Q16795	NADH dehydrogenase [ubiquinone] 1 alpha subcomplex subunit 9, mitochondrial	sp|Q16795|NDUA9_HUMAN NADH dehydrogenase [ubiquinone] 1 alpha subcomplex subunit 9, mitochondrial OS=Homo sapiens OX=9606 GN=NDUFA9 PE=1 SV=2	28.2048	28.1576	28.2702	28.1745	27.8022	28.5014	28.2883	27.0893
NDUFAB1	O14561	Acyl carrier protein, mitochondrial	sp|O14561|ACPM_HUMAN Acyl carrier protein, mitochondrial OS=Homo sapiens OX=9606 GN=NDUFAB1 PE=1 SV=3	26.4482	26.3102	26.2378	25.0687	25.8783	26.054	23.3627	24.5108
NDUFAF2	Q8N183	Mimitin, mitochondrial	sp|Q8N183|NDUF2_HUMAN NADH dehydrogenase [ubiquinone] 1 alpha subcomplex assembly factor 2 OS=Homo sapiens OX=9606 GN=NDUFAF2 PE=1 SV=1	22.5937	NA	22.6623	22.5793	NA	NA	NA	NA
NDUFAF3	Q9BU61	NADH dehydrogenase [ubiquinone] 1 alpha subcomplex assembly factor 3	sp|Q9BU61|NDUF3_HUMAN NADH dehydrogenase [ubiquinone] 1 alpha subcomplex assembly factor 3 OS=Homo sapiens OX=9606 GN=NDUFAF3 PE=1 SV=1	24.006	23.3261	23.464	23.4293	23.5045	22.9898	23.992	23.386
NDUFAF4	Q9P032	NADH dehydrogenase [ubiquinone] 1 alpha subcomplex assembly factor 4	sp|Q9P032|NDUF4_HUMAN NADH dehydrogenase [ubiquinone] 1 alpha subcomplex assembly factor 4 OS=Homo sapiens OX=9606 GN=NDUFAF4 PE=1 SV=1	NA	21.7552	NA	NA	NA	NA	NA	NA
NDUFB1	O75438	NADH dehydrogenase [ubiquinone] 1 beta subcomplex subunit 1	sp|O75438|NDUB1_HUMAN NADH dehydrogenase [ubiquinone] 1 beta subcomplex subunit 1 OS=Homo sapiens OX=9606 GN=NDUFB1 PE=1 SV=1	25.1982	24.791	25.1104	25.3087	25.0923	24.9996	25.6709	25.1403
NDUFB10	O96000	NADH dehydrogenase [ubiquinone] 1 beta subcomplex subunit 10	sp|O96000|NDUBA_HUMAN NADH dehydrogenase [ubiquinone] 1 beta subcomplex subunit 10 OS=Homo sapiens OX=9606 GN=NDUFB10 PE=1 SV=3	27.7346	27.7606	27.9661	27.9084	27.8457	27.9221	28.2748	28.708
NDUFB11	Q9NX14	NADH dehydrogenase [ubiquinone] 1 beta subcomplex subunit 11, mitochondrial	sp|Q9NX14|NDUBB_HUMAN NADH dehydrogenase [ubiquinone] 1 beta subcomplex subunit 11, mitochondrial OS=Homo sapiens OX=9606 GN=NDUFB11 PE=1 SV=1	25.7769	26.1795	26.0606	26.6381	25.1131	25.1983	NA	23.6406
NDUFB2	O95178	NADH dehydrogenase [ubiquinone] 1 beta subcomplex subunit 2, mitochondrial	sp|O95178|NDUB2_HUMAN NADH dehydrogenase [ubiquinone] 1 beta subcomplex subunit 2, mitochondrial OS=Homo sapiens OX=9606 GN=NDUFB2 PE=1 SV=1	NA	NA	25.9141	25.6494	25.4659	NA	NA	NA
NDUFB3	O43676	NADH dehydrogenase [ubiquinone] 1 beta subcomplex subunit 3	sp|O43676|NDUB3_HUMAN NADH dehydrogenase [ubiquinone] 1 beta subcomplex subunit 3 OS=Homo sapiens OX=9606 GN=NDUFB3 PE=1 SV=3	27.4716	27.184	27.1399	27.3077	27.4376	27.3342	27.7693	26.8826
NDUFB4	O95168	NADH dehydrogenase [ubiquinone] 1 beta subcomplex subunit 4	sp|O95168|NDUB4_HUMAN NADH dehydrogenase [ubiquinone] 1 beta subcomplex subunit 4 OS=Homo sapiens OX=9606 GN=NDUFB4 PE=1 SV=3	29.4205	29.0078	29.1073	28.9199	29.1896	29.2405	29.5746	29.1635
NDUFB5	O43674	NADH dehydrogenase [ubiquinone] 1 beta subcomplex subunit 5, mitochondrial	sp|O43674|NDUB5_HUMAN NADH dehydrogenase [ubiquinone] 1 beta subcomplex subunit 5, mitochondrial OS=Homo sapiens OX=9606 GN=NDUFB5 PE=1 SV=1	25.6543	26.0094	25.8866	25.9932	25.3207	26.0528	25.0138	25.2946
NDUFB6	O95139	NADH dehydrogenase [ubiquinone] 1 beta subcomplex subunit 6	sp|O95139|NDUB6_HUMAN NADH dehydrogenase [ubiquinone] 1 beta subcomplex subunit 6 OS=Homo sapiens OX=9606 GN=NDUFB6 PE=1 SV=3	26.1839	26.4243	26.2934	26.2619	25.5549	25.7746	26.2517	26.1399
NDUFB7	P17568	NADH dehydrogenase [ubiquinone] 1 beta subcomplex subunit 7	sp|P17568|NDUB7_HUMAN NADH dehydrogenase [ubiquinone] 1 beta subcomplex subunit 7 OS=Homo sapiens OX=9606 GN=NDUFB7 PE=1 SV=4	26.0384	26.2646	26.621	26.5639	24.2475	25.3328	24.1581	25.1929
NDUFB8	O95169	NADH dehydrogenase [ubiquinone] 1 beta subcomplex subunit 8, mitochondrial	sp|O95169|NDUB8_HUMAN NADH dehydrogenase [ubiquinone] 1 beta subcomplex subunit 8, mitochondrial OS=Homo sapiens OX=9606 GN=NDUFB8 PE=1 SV=1	25.0786	25.4086	25.3215	25.2434	24.5111	25.2691	25.1645	23.4512
NDUFB9	Q9Y6M9	NADH dehydrogenase [ubiquinone] 1 beta subcomplex subunit 9	sp|Q9Y6M9|NDUB9_HUMAN NADH dehydrogenase [ubiquinone] 1 beta subcomplex subunit 9 OS=Homo sapiens OX=9606 GN=NDUFB9 PE=1 SV=3	26.1101	26.1236	26.1236	26.036	25.1725	25.856	26.4333	25.6622
NDUFC2	O95298	NADH dehydrogenase [ubiquinone] 1 subunit C2;NADH dehydrogenase [ubiquinone] 1 subunit C2, isoform 2	sp|O95298|NDUC2_HUMAN NADH dehydrogenase [ubiquinone] 1 subunit C2 OS=Homo sapiens OX=9606 GN=NDUFC2 PE=1 SV=1;sp|E9PQ53|NDUCR_HUMAN NADH dehydrogenase [ubiquinone] 1 subunit C2, isoform 2 OS=Homo sapiens OX=9606 GN=NDUFC2-KCTD14 PE=1 SV=1	25.8839	25.1972	25.4696	23.2938	26.5178	26.8831	26.4379	26.5936
NDUFS1	P28331	NADH-ubiquinone oxidoreductase 75 kDa subunit, mitochondrial	sp|P28331|NDUS1_HUMAN NADH-ubiquinone oxidoreductase 75 kDa subunit, mitochondrial OS=Homo sapiens OX=9606 GN=NDUFS1 PE=1 SV=3	30.1162	30.2471	30.1865	30.1027	28.9937	29.7613	30.0491	29.2093
NDUFS2	O75306	NADH dehydrogenase [ubiquinone] iron-sulfur protein 2, mitochondrial	sp|O75306|NDUS2_HUMAN NADH dehydrogenase [ubiquinone] iron-sulfur protein 2, mitochondrial OS=Homo sapiens OX=9606 GN=NDUFS2 PE=1 SV=2	27.807	27.6828	27.8001	27.7179	26.3925	27.5964	27.3078	26.5705
NDUFS3	O75489	NADH dehydrogenase [ubiquinone] iron-sulfur protein 3, mitochondrial	sp|O75489|NDUS3_HUMAN NADH dehydrogenase [ubiquinone] iron-sulfur protein 3, mitochondrial OS=Homo sapiens OX=9606 GN=NDUFS3 PE=1 SV=1	28.8197	28.7631	28.9734	28.9646	27.0538	27.222	28.3225	28.2688
NDUFS4	O43181	NADH dehydrogenase [ubiquinone] iron-sulfur protein 4, mitochondrial	sp|O43181|NDUS4_HUMAN NADH dehydrogenase [ubiquinone] iron-sulfur protein 4, mitochondrial OS=Homo sapiens OX=9606 GN=NDUFS4 PE=1 SV=1	25.6248	26.017	25.9903	25.9035	23.3853	24.2754	24.6975	23.4102
NDUFS5	O43920	NADH dehydrogenase [ubiquinone] iron-sulfur protein 5	sp|O43920|NDUS5_HUMAN NADH dehydrogenase [ubiquinone] iron-sulfur protein 5 OS=Homo sapiens OX=9606 GN=NDUFS5 PE=1 SV=3	24.1789	NA	24.771	24.5592	23.4975	23.393	24.5533	23.5745
NDUFS6	O75380	NADH dehydrogenase [ubiquinone] iron-sulfur protein 6, mitochondrial	sp|O75380|NDUS6_HUMAN NADH dehydrogenase [ubiquinone] iron-sulfur protein 6, mitochondrial OS=Homo sapiens OX=9606 GN=NDUFS6 PE=1 SV=1	25.0911	25.3413	25.2036	25.3797	NA	25.2521	24.3294	25.3604
NDUFS7	O75251	NADH dehydrogenase [ubiquinone] iron-sulfur protein 7, mitochondrial	sp|O75251|NDUS7_HUMAN NADH dehydrogenase [ubiquinone] iron-sulfur protein 7, mitochondrial OS=Homo sapiens OX=9606 GN=NDUFS7 PE=1 SV=3	26.678	26.7078	26.8121	26.6901	25.9859	26.2549	27.0148	26.9121
NDUFS8	O00217	NADH dehydrogenase [ubiquinone] iron-sulfur protein 8, mitochondrial	sp|O00217|NDUS8_HUMAN NADH dehydrogenase [ubiquinone] iron-sulfur protein 8, mitochondrial OS=Homo sapiens OX=9606 GN=NDUFS8 PE=1 SV=1	27.4666	27.3644	27.0173	27.0453	27.0732	27.1434	27.3956	26.676
NDUFV1	P49821	NADH dehydrogenase [ubiquinone] flavoprotein 1, mitochondrial	sp|P49821|NDUV1_HUMAN NADH dehydrogenase [ubiquinone] flavoprotein 1, mitochondrial OS=Homo sapiens OX=9606 GN=NDUFV1 PE=1 SV=4	27.6792	28.2085	27.8206	27.8034	26.2439	26.8986	26.1447	25.7758
NDUFV2	P19404	NADH dehydrogenase [ubiquinone] flavoprotein 2, mitochondrial	sp|P19404|NDUV2_HUMAN NADH dehydrogenase [ubiquinone] flavoprotein 2, mitochondrial OS=Homo sapiens OX=9606 GN=NDUFV2 PE=1 SV=2	26.236	26.6783	26.4529	27.2228	25.1541	24.892	26.0244	24.3671
NDUFV3	P56181	NADH dehydrogenase [ubiquinone] flavoprotein 3, mitochondrial	sp|P56181|NDUV3_HUMAN NADH dehydrogenase [ubiquinone] flavoprotein 3, mitochondrial OS=Homo sapiens OX=9606 GN=NDUFV3 PE=1 SV=2	NA	23.3955	23.1609	NA	NA	NA	NA	NA
NEBL	O76041	Nebulette	sp|O76041|NEBL_HUMAN Nebulette OS=Homo sapiens OX=9606 GN=NEBL PE=1 SV=1	23.761	24.3052	23.3578	24.7897	24.177	23.8475	24.1128	24.6704
NECAB1	Q8N987	N-terminal EF-hand calcium-binding protein 1	sp|Q8N987|NECA1_HUMAN N-terminal EF-hand calcium-binding protein 1 OS=Homo sapiens OX=9606 GN=NECAB1 PE=1 SV=1	25.3715	25.4073	25.7605	25.562	NA	24.7827	23.7124	23.9743
NECAB2	Q7Z6G3	N-terminal EF-hand calcium-binding protein 2	sp|Q7Z6G3|NECA2_HUMAN N-terminal EF-hand calcium-binding protein 2 OS=Homo sapiens OX=9606 GN=NECAB2 PE=1 SV=1	26.1745	25.3183	25.885	25.6768	NA	24.6339	25.647	NA
NECAP1	Q8NC96	Adaptin ear-binding coat-associated protein 1	sp|Q8NC96|NECP1_HUMAN Adaptin ear-binding coat-associated protein 1 OS=Homo sapiens OX=9606 GN=NECAP1 PE=1 SV=2	25.165	25.3756	24.9075	25.9001	23.5219	24.4674	24.9004	NA
NEDD4L	Q96PU5	E3 ubiquitin-protein ligase NEDD4-like	sp|Q96PU5|NED4L_HUMAN E3 ubiquitin-protein ligase NEDD4-like OS=Homo sapiens OX=9606 GN=NEDD4L PE=1 SV=2	23.4347	23.6239	23.8351	23.8425	24.2758	24.5572	25.381	24.5706
NEDD8	Q15843	NEDD8	sp|Q15843|NEDD8_HUMAN NEDD8 OS=Homo sapiens OX=9606 GN=NEDD8 PE=1 SV=1	23.8145	24.6644	24.3408	24.8275	25.0188	25.1196	25.2782	NA
NEFH	P12036	Neurofilament heavy polypeptide	sp|P12036|NFH_HUMAN Neurofilament heavy polypeptide OS=Homo sapiens OX=9606 GN=NEFH PE=1 SV=4	29.6495	30.5496	30.7068	30.8238	30.1385	29.3627	29.5899	28.5928
NEFL	P07196	Neurofilament light polypeptide	sp|P07196|NFL_HUMAN Neurofilament light polypeptide OS=Homo sapiens OX=9606 GN=NEFL PE=1 SV=3	32.922	33.3264	33.4163	33.599	33.3256	32.7017	33.4335	33.9252
NEFM	P07197	Neurofilament medium polypeptide	sp|P07197|NFM_HUMAN Neurofilament medium polypeptide OS=Homo sapiens OX=9606 GN=NEFM PE=1 SV=3	32.2572	32.6239	32.6854	32.9468	32.5884	31.9208	32.2622	32.8146
NEGR1	Q7Z3B1	Neuronal growth regulator 1	sp|Q7Z3B1|NEGR1_HUMAN Neuronal growth regulator 1 OS=Homo sapiens OX=9606 GN=NEGR1 PE=1 SV=3	28.3631	27.9256	28.0477	27.6386	27.55	28.3591	27.3767	28.1878
NELL2	Q99435	Protein kinase C-binding protein NELL2	sp|Q99435|NELL2_HUMAN Protein kinase C-binding protein NELL2 OS=Homo sapiens OX=9606 GN=NELL2 PE=1 SV=1	22.5059	NA	23.1175	NA	NA	22.646	22.979	NA
NEMF	O60524	Nuclear export mediator factor NEMF	sp|O60524|NEMF_HUMAN Nuclear export mediator factor NEMF OS=Homo sapiens OX=9606 GN=NEMF PE=1 SV=4	22.3572	21.8536	22.4093	22.1077	22.1715	22.0723	NA	22.2535
NES	P48681	Nestin	sp|P48681|NEST_HUMAN Nestin OS=Homo sapiens OX=9606 GN=NES PE=1 SV=2	22.3372	22.127	22.1768	21.6681	24.3898	23.2116	23.6633	22.3854
NF1	P21359	Neurofibromin;Neurofibromin truncated	sp|P21359|NF1_HUMAN Neurofibromin OS=Homo sapiens OX=9606 GN=NF1 PE=1 SV=2	24.3444	24.6182	24.8631	24.2577	24.1444	24.2445	23.4399	23.4924
NFASC	O94856	Neurofascin	sp|O94856|NFASC_HUMAN Neurofascin OS=Homo sapiens OX=9606 GN=NFASC PE=1 SV=4	29.1069	29.0605	29.0359	29.2144	29.1497	29.1837	29.1462	28.9913
NFS1	Q9Y697	Cysteine desulfurase, mitochondrial	sp|Q9Y697|NFS1_HUMAN Cysteine desulfurase, mitochondrial OS=Homo sapiens OX=9606 GN=NFS1 PE=1 SV=3	26.4497	26.3902	26.4243	26.3549	25.4302	26.073	26.0781	25.9333
NFU1	Q9UMS0	NFU1 iron-sulfur cluster scaffold homolog, mitochondrial	sp|Q9UMS0|NFU1_HUMAN NFU1 iron-sulfur cluster scaffold homolog, mitochondrial OS=Homo sapiens OX=9606 GN=NFU1 PE=1 SV=2	23.9605	24.2167	24.1608	24.14	24.0152	24.2178	24.7086	23.9014
NGEF	Q8N5V2	Ephexin-1	sp|Q8N5V2|NGEF_HUMAN Ephexin-1 OS=Homo sapiens OX=9606 GN=NGEF PE=1 SV=2	25.0221	26.0114	26.1318	25.2602	24.3869	25.3555	24.4593	25.6843
NHP2L1	P55769	NHP2-like protein 1;NHP2-like protein 1, N-terminally processed	sp|P55769|NH2L1_HUMAN NHP2-like protein 1 OS=Homo sapiens OX=9606 GN=SNU13 PE=1 SV=3	23.4841	23.1444	23.3108	23.5347	24.2706	NA	23.4004	25.4569
NID1	P14543	Nidogen-1	sp|P14543|NID1_HUMAN Nidogen-1 OS=Homo sapiens OX=9606 GN=NID1 PE=1 SV=3	23.2068	NA	NA	NA	24.2508	23.2119	24.2987	24.6145
NID2	Q14112	Nidogen-2	sp|Q14112|NID2_HUMAN Nidogen-2 OS=Homo sapiens OX=9606 GN=NID2 PE=1 SV=3	NA	NA	NA	22.7886	NA	NA	NA	NA
NIF3L1	Q9GZT8	NIF3-like protein 1	sp|Q9GZT8|NIF3L_HUMAN NIF3-like protein 1 OS=Homo sapiens OX=9606 GN=NIF3L1 PE=1 SV=2	NA	22.8062	22.8089	23.54	NA	NA	NA	22.6096
NIN	Q8N4C6	Ninein	sp|Q8N4C6|NIN_HUMAN Ninein OS=Homo sapiens OX=9606 GN=NIN PE=1 SV=4	NA	NA	NA	27.4309	NA	NA	NA	NA
NIPSNAP1	Q9BPW8	Protein NipSnap homolog 1	sp|Q9BPW8|NIPS1_HUMAN Protein NipSnap homolog 1 OS=Homo sapiens OX=9606 GN=NIPSNAP1 PE=1 SV=1	27.2503	27.7737	27.5236	27.4198	26.7075	26.8089	28.0013	27.4093
NIPSNAP3A	Q9UFN0	Protein NipSnap homolog 3A	sp|Q9UFN0|NPS3A_HUMAN Protein NipSnap homolog 3A OS=Homo sapiens OX=9606 GN=NIPSNAP3A PE=1 SV=2	24.1674	24.6229	25.0951	25.5637	NA	NA	NA	NA
NIPSNAP3B	Q9BS92	Protein NipSnap homolog 3B	sp|Q9BS92|NPS3B_HUMAN Protein NipSnap homolog 3B OS=Homo sapiens OX=9606 GN=NIPSNAP3B PE=2 SV=1	NA	NA	22.9069	23.0607	NA	NA	NA	NA
NIT1	Q86X76	Nitrilase homolog 1	sp|Q86X76|NIT1_HUMAN Deaminated glutathione amidase OS=Homo sapiens OX=9606 GN=NIT1 PE=1 SV=2	NA	NA	NA	23.0907	NA	NA	NA	NA
NIT2	Q9NQR4	Omega-amidase NIT2	sp|Q9NQR4|NIT2_HUMAN Omega-amidase NIT2 OS=Homo sapiens OX=9606 GN=NIT2 PE=1 SV=1	NA	NA	NA	23.101	NA	NA	NA	NA
NLGN2	Q8NFZ4	Neuroligin-2;Neuroligin-1	sp|Q8NFZ4|NLGN2_HUMAN Neuroligin-2 OS=Homo sapiens OX=9606 GN=NLGN2 PE=1 SV=1;sp|Q8N2Q7|NLGN1_HUMAN Neuroligin-1 OS=Homo sapiens OX=9606 GN=NLGN1 PE=1 SV=3	NA	23.6435	23.594	23.4614	NA	NA	NA	NA
NLGN3	Q9NZ94	Neuroligin-3	sp|Q9NZ94|NLGN3_HUMAN Neuroligin-3 OS=Homo sapiens OX=9606 GN=NLGN3 PE=1 SV=2	NA	NA	NA	NA	NA	NA	22.1095	NA
NLN	Q9BYT8	Neurolysin, mitochondrial	sp|Q9BYT8|NEUL_HUMAN Neurolysin, mitochondrial OS=Homo sapiens OX=9606 GN=NLN PE=1 SV=1	24.0267	24.5806	24.7012	24.3284	NA	23.4738	24.142	24.2395
NME1	P15531	Nucleoside diphosphate kinase A	sp|P15531|NDKA_HUMAN Nucleoside diphosphate kinase A OS=Homo sapiens OX=9606 GN=NME1 PE=1 SV=1	26.4467	27.1444	26.8399	26.6267	23.9405	24.5963	25.6075	NA
NME2	P22392	Nucleoside diphosphate kinase B;Putative nucleoside diphosphate kinase	sp|P22392|NDKB_HUMAN Nucleoside diphosphate kinase B OS=Homo sapiens OX=9606 GN=NME2 PE=1 SV=1;sp|O60361|NDK8_HUMAN Putative nucleoside diphosphate kinase OS=Homo sapiens OX=9606 GN=NME2P1 PE=5 SV=1	25.5969	26.1932	26.2393	26.1632	24.6823	24.5609	25.2199	24.5284
NME3	Q13232	Nucleoside diphosphate kinase 3	sp|Q13232|NDK3_HUMAN Nucleoside diphosphate kinase 3 OS=Homo sapiens OX=9606 GN=NME3 PE=1 SV=2	23.1956	22.767	NA	NA	NA	22.8525	NA	NA
NMRAL1	Q9HBL8	NmrA-like family domain-containing protein 1	sp|Q9HBL8|NMRL1_HUMAN NmrA-like family domain-containing protein 1 OS=Homo sapiens OX=9606 GN=NMRAL1 PE=1 SV=1	NA	23.1409	NA	NA	NA	NA	NA	23.5965
NMT1	P30419	Glycylpeptide N-tetradecanoyltransferase 1	sp|P30419|NMT1_HUMAN Glycylpeptide N-tetradecanoyltransferase 1 OS=Homo sapiens OX=9606 GN=NMT1 PE=1 SV=2	24.1932	23.9308	23.9777	24.7041	23.1961	23.5777	23.7259	22.1926
NNT	Q13423	NAD(P) transhydrogenase, mitochondrial	sp|Q13423|NNTM_HUMAN NAD(P) transhydrogenase, mitochondrial OS=Homo sapiens OX=9606 GN=NNT PE=1 SV=3	30.0583	30.1224	30.3506	29.7637	30.3004	30.4942	30.4288	29.8574
NOL3	O60936	Nucleolar protein 3	sp|O60936|NOL3_HUMAN Nucleolar protein 3 OS=Homo sapiens OX=9606 GN=NOL3 PE=1 SV=2	23.5001	NA	NA	23.3824	NA	23.6779	NA	NA
NOMO3	P69849	Nodal modulator 3;Nodal modulator 1;Nodal modulator 2	sp|P69849|NOMO3_HUMAN Nodal modulator 3 OS=Homo sapiens OX=9606 GN=NOMO3 PE=3 SV=2;sp|Q15155|NOMO1_HUMAN Nodal modulator 1 OS=Homo sapiens OX=9606 GN=NOMO1 PE=1 SV=5;sp|Q5JPE7|NOMO2_HUMAN Nodal modulator 2 OS=Homo sapiens OX=9606 GN=NOMO2 PE=1 SV=1	23.7035	24.3033	24.1064	24.0815	24.8284	24.2216	23.9226	24.4052
NONO	Q15233	Non-POU domain-containing octamer-binding protein	sp|Q15233|NONO_HUMAN Non-POU domain-containing octamer-binding protein OS=Homo sapiens OX=9606 GN=NONO PE=1 SV=4	25.1355	25.6442	25.328	26.2722	27.5455	27.4299	27.1629	26.9682
[truncated: 1,363 more rows]
