# Supplementary material for: Cortical Pathology in Vanishing White Matter
Source: Cells. 2022 Nov 12;11(22):3581. doi: 10.3390/cells11223581 (PMC9688115; doi:10.3390/cells11223581)
Supplement: Supplementary file 1 [file cells-11-03581-s001.zip › cells-1858119_Man et al. Table S2_final.xlsx]

## Sheet: Table S2
Protein name	ProteinID	Protein description	log2FC	p-value	adj. p-value	Significant (Log2FC ±1.5, adj. p-value < 0.05)?
ABHD10	Q9NUJ1	Mycophenolic acid acyl-glucuronide esterase, mitochondrial	-2.65089	0.00123325	0.0159877	Yes
ACAT2	Q9BWD1	Acetyl-CoA acetyltransferase, cytosolic	-4.92071	0.00262139	0.0260585	Yes
ACO2	Q99798	Aconitate hydratase, mitochondrial	-1.72367	0.000664015	0.0105031	Yes
ACOT7	O00154	Cytosolic acyl coenzyme A thioester hydrolase	-2.48118	0.000402476	0.00770764	Yes
ACOT8	O14734	Acyl-coenzyme A thioesterase 8	4.02545	2.77762e-05	0.000983903	Yes
ACOT9	Q9Y305	Acyl-coenzyme A thioesterase 9, mitochondrial	-1.81369	0.000786501	0.0118631	Yes
ACSL4	O60488	Long-chain-fatty-acid--CoA ligase 4	5.31817	3.94571e-07	4.26247e-05	Yes
ACTB	P60709	Actin, cytoplasmic 1;Actin, cytoplasmic 1, N-terminally processed	6.35106	0.0040461	0.0339198	Yes
ACTG1	P63261	Actin, cytoplasmic 2;Actin, cytoplasmic 2, N-terminally processed	7.22342	6.533e-10	1.64305e-06	Yes
ADH5	P11766	Alcohol dehydrogenase class-3	-1.87361	8.44405e-05	0.00252819	Yes
AGAP2	Q99490	Arf-GAP with GTPase, ANK repeat and PH domain-containing protein 2	1.61158	0.00102754	0.0144003	Yes
AGK	Q53H12	Acylglycerol kinase, mitochondrial	-2.48356	0.00131192	0.0166329	Yes
AGL	P35573	Glycogen debranching enzyme;4-alpha-glucanotransferase;Amylo-alpha-1,6-glucosidase	-1.65697	0.00436203	0.0346882	Yes
AGT	P01019	Angiotensinogen;Angiotensin-1;Angiotensin-2;Angiotensin-3;Angiotensin-4;Angiotensin 1-9;Angiotensin 1-7;Angiotensin 1-5;Angiotensin 1-4	-3.84973	0.00618084	0.0405379	Yes
AHCY	P23526	Adenosylhomocysteinase	-4.05072	0.00853068	0.04865	Yes
AHCYL1	O43865	Putative adenosylhomocysteinase 2	-3.70053	0.000191365	0.00449797	Yes
AHNAK2	Q8IVF2	Protein AHNAK2	-2.30416	0.00164382	0.0194094	Yes
AK3	Q9UIJ7	GTP:AMP phosphotransferase AK3, mitochondrial	-1.91824	0.000922705	0.0135708	Yes
AKR7A2	O43488	Aflatoxin B1 aldehyde reductase member 2	-1.91053	0.000210766	0.00477546	Yes
ALDH1A1	P00352	Retinal dehydrogenase 1	-5.33978	0.000963745	0.01393	Yes
ALDH2	P05091	Aldehyde dehydrogenase, mitochondrial	-1.68842	0.00391692	0.0333934	Yes
ALDH4A1	P30038	Delta-1-pyrroline-5-carboxylate dehydrogenase, mitochondrial	-3.11413	0.00174436	0.0201912	Yes
ALDH5A1	P51649	Succinate-semialdehyde dehydrogenase, mitochondrial	-2.34807	0.000165294	0.00401176	Yes
ALDH7A1	P49419	Alpha-aminoadipic semialdehyde dehydrogenase	-4.63081	0.00270498	0.0264709	Yes
ALDH9A1	P49189	4-trimethylaminobutyraldehyde dehydrogenase	-2.23786	3.11746e-06	0.000166817	Yes
ALDOA	P04075	Fructose-bisphosphate aldolase A	-2.29011	3.2756e-05	0.00111326	Yes
ALDOC	P09972	Fructose-bisphosphate aldolase C	-3.39984	2.81857e-05	0.000984541	Yes
APEH	P13798	Acylamino-acid-releasing enzyme	-3.82097	0.00506393	0.0375173	Yes
ARPC5	O15511	Actin-related protein 2/3 complex subunit 5	-4.25066	0.0056533	0.0388472	Yes
ARPC5L	Q9BPX5	Actin-related protein 2/3 complex subunit 5-like protein	-1.63673	0.00618395	0.0405379	Yes
ARRB1	P49407	Beta-arrestin-1	-3.64993	0.00684338	0.0427373	Yes
ASRGL1	Q7L266	Isoaspartyl peptidase/L-asparaginase;Isoaspartyl peptidase/L-asparaginase alpha chain;Isoaspartyl peptidase/L-asparaginase beta chain	-4.12091	7.66177e-06	0.00033223	Yes
ATP1B3	P54709	Sodium/potassium-transporting ATPase subunit beta-3	-3.71308	0.00534728	0.0382822	Yes
ATP6V1B2	P21281	V-type proton ATPase subunit B, brain isoform	-1.91217	0.000153561	0.00397317	Yes
ATP6V1G1	O75348	V-type proton ATPase subunit G 1	-3.65239	0.00178853	0.0201912	Yes
BAI2	O60241	Brain-specific angiogenesis inhibitor 2	3.37598	0.00541878	0.038433	Yes
BASP1	P80723	Brain acid soluble protein 1	-4.54435	0.000188057	0.00446191	Yes
BCKDK	O14874	[3-methyl-2-oxobutanoate dehydrogenase [lipoamide]] kinase, mitochondrial	-4.92733	7.71497e-07	6.06348e-05	Yes
BOLA2	Q9H3K6	BolA-like protein 2	3.93813	0.00446749	0.0346882	Yes
BROX	Q5VW32	BRO1 domain-containing protein BROX	-5.51758	1.86577e-08	9.38481e-06	Yes
C16orf70	Q9BSU1	UPF0183 protein C16orf70	-3.532	1.37189e-06	9.07974e-05	Yes
CA2	P00918	Carbonic anhydrase 2	-2.66807	8.34127e-05	0.00252751	Yes
CALB2	P22676	Calretinin	-2.4845	0.00287997	0.0276455	Yes
CAPZA1	P52907	F-actin-capping protein subunit alpha-1	-1.87855	0.000336347	0.00693372	Yes
CAPZB	P47756	F-actin-capping protein subunit beta	-1.6144	0.000166718	0.00401176	Yes
CCDC177	Q9NQR7	Coiled-coil domain-containing protein 177	1.844	0.000639596	0.0103118	Yes
CCDC92	Q53HC0	Coiled-coil domain-containing protein 92	-4.25068	8.48289e-08	2.66681e-05	Yes
CCT4	P50991	T-complex protein 1 subunit delta	-1.73411	0.000149098	0.00394716	Yes
CCT8	P50990	T-complex protein 1 subunit theta	-1.89507	0.000200813	0.00463343	Yes
CDC37	Q16543	Hsp90 co-chaperone Cdc37;Hsp90 co-chaperone Cdc37, N-terminally processed	-1.80322	0.000999792	0.0142311	Yes
CEP41	Q9BYV8	Centrosomal protein of 41 kDa	-3.19856	0.00797667	0.0463189	Yes
CFL2	Q9Y281	Cofilin-2	-1.89254	0.00143079	0.0176171	Yes
CHMP3	Q9Y3E7	Charged multivesicular body protein 3	-4.29587	0.00632937	0.0410267	Yes
CHORDC1	Q9UHD1	Cysteine and histidine-rich domain-containing protein 1	-4.58336	1.04181e-07	2.75934e-05	Yes
CNRIP1	Q96F85	CB1 cannabinoid receptor-interacting protein 1	2.05425	0.00459683	0.0351399	Yes
COTL1	Q14019	Coactosin-like protein	-1.91522	0.00512099	0.0376213	Yes
COX6B1	P14854	Cytochrome c oxidase subunit 6B1	4.35499	0.00446117	0.0346882	Yes
CRAT	P43155	Carnitine O-acetyltransferase	-1.74613	0.000279317	0.00590322	Yes
CRYM	Q14894	Ketimine reductase mu-crystallin	-1.85118	0.00693632	0.0430737	Yes
CRYZ	Q08257	Quinone oxidoreductase	-3.75819	0.00552443	0.0386506	Yes
CRYZL1	O95825	Quinone oxidoreductase-like protein 1	-4.52639	5.56828e-08	2.33404e-05	Yes
CSRP1	P21291	Cysteine and glycine-rich protein 1	-5.04182	1.59916e-05	0.000628421	Yes
CST3	P01034	Cystatin-C	-6.04728	2.14542e-06	0.00012263	Yes
CTBP1	Q13363	C-terminal-binding protein 1	-2.05058	0.000437419	0.00814896	Yes
CUTA	O60888	Protein CutA	-4.38748	0.00791328	0.0462835	Yes
CYB5R2	Q6BCY4	NADH-cytochrome b5 reductase 2	-3.9091	0.00632807	0.0410267	Yes
CYCS	P99999	Cytochrome c	-2.14118	0.000651285	0.010367	Yes
DAAM2	Q86T65	Disheveled-associated activator of morphogenesis 2	-4.08981	0.000610579	0.0101109	Yes
DBI	P07108	Acyl-CoA-binding protein	-5.87626	1.35385e-07	2.75934e-05	Yes
DDB1	Q16531	DNA damage-binding protein 1	-3.03701	0.000389293	0.007649	Yes
DECR1	Q16698	2,4-dienoyl-CoA reductase, mitochondrial	-2.42376	0.000568273	0.00965492	Yes
DEK	P35659	Protein DEK	3.57821	0.00147915	0.017832	Yes
DENR	O43583	Density-regulated protein	-3.98671	0.00414969	0.0341061	Yes
DLST	P36957	Dihydrolipoyllysine-residue succinyltransferase component of 2-oxoglutarate dehydrogenase complex, mitochondrial	-1.664	0.0061651	0.0405379	Yes
DPYSL2	Q16555	Dihydropyrimidinase-related protein 2	-1.52718	0.000650832	0.010367	Yes
DPYSL3	Q14195	Dihydropyrimidinase-related protein 3	-2.35801	0.000611074	0.0101109	Yes
ECHDC1	Q9NTX5	Ethylmalonyl-CoA decarboxylase	-4.23121	0.00313581	0.0289947	Yes
ECHS1	P30084	Enoyl-CoA hydratase, mitochondrial	-2.73607	0.000147376	0.00394309	Yes
EIF2S3	P41091	Eukaryotic translation initiation factor 2 subunit 3;Putative eukaryotic translation initiation factor 2 subunit 3-like protein	-4.23705	0.00387463	0.0332066	Yes
ELMO1	Q92556	Engulfment and cell motility protein 1	-4.61423	0.00388181	0.0332066	Yes
ELMO2	Q96JJ3	Engulfment and cell motility protein 2	-2.68673	0.00570184	0.0390739	Yes
EML2	O95834	Echinoderm microtubule-associated protein-like 2	-4.84887	3.15946e-05	0.0010885	Yes
ENO2	P09104	Gamma-enolase	-2.20368	0.0039344	0.0334291	Yes
EPHX2	P34913	Bifunctional epoxide hydrolase 2;Cytosolic epoxide hydrolase 2;Lipid-phosphate phosphatase	-4.51534	2.02282e-07	3.24657e-05	Yes
ERMN	Q8TAM6	Ermin	-5.31922	0.00143599	0.0176171	Yes
EZR	P15311	Ezrin	-2.55904	3.59518e-05	0.00117477	Yes
FABP3	P05413	Fatty acid-binding protein, heart	-1.77939	0.00249776	0.0253301	Yes
FAIM2	Q9BWQ8	Protein lifeguard 2	-3.90827	0.00590328	0.0399106	Yes
FAM175B	Q15018	BRISC complex subunit Abro1	-4.49912	7.30652e-07	5.92771e-05	Yes
FAM96B	Q9Y3D0	Mitotic spindle-associated MMXD complex subunit MIP18	3.92705	0.00615327	0.0405379	Yes
FAM98B	Q52LJ0	Protein FAM98B	-4.00462	0.00683397	0.0427373	Yes
FBXL18	Q96ME1	F-box/LRR-repeat protein 18	-3.48619	0.00239212	0.0246564	Yes
FECH	P22830	Ferrochelatase, mitochondrial	-5.63673	8.7661e-07	6.22999e-05	Yes
FHL1	Q13642	Four and a half LIM domains protein 1	-5.26284	3.02663e-07	3.80599e-05	Yes
FNBP1	Q96RU3	Formin-binding protein 1	-4.659	8.1931e-07	6.09047e-05	Yes
GABRG2	P18507	Gamma-aminobutyric acid receptor subunit gamma-2;Gamma-aminobutyric acid receptor subunit gamma-1	-3.67886	0.007136	0.0435608	Yes
GAMT	Q14353	Guanidinoacetate N-methyltransferase	-3.88997	0.00584715	0.0396377	Yes
GATM	P50440	Glycine amidinotransferase, mitochondrial	-4.22753	1.47608e-06	9.51884e-05	Yes
GCA	P28676	Grancalcin	-4.24394	2.32359e-07	3.24657e-05	Yes
GDA	Q9Y2T3	Guanine deaminase	-2.56396	2.09167e-05	0.000785156	Yes
GFOD1	Q9NXC2	Glucose-fructose oxidoreductase domain-containing protein 1	-3.37561	0.00533012	0.0382822	Yes
GHITM	Q9H3K2	Growth hormone-inducible transmembrane protein	-3.19241	0.00255249	0.0254742	Yes
GJA1	P17302	Gap junction alpha-1 protein	-6.43822	1.84016e-07	3.24657e-05	Yes
GLTP	Q9NZD2	Glycolipid transfer protein	-4.48644	0.00432361	0.0346882	Yes
GLUD1	P00367	Glutamate dehydrogenase 1, mitochondrial;Glutamate dehydrogenase 2, mitochondrial	-2.00573	0.00194213	0.0213295	Yes
GLUL	P15104	Glutamine synthetase	-7.81539	0.000245889	0.00547267	Yes
GMPPA	Q96IJ6	Mannose-1-phosphate guanyltransferase alpha	-3.49099	1.74579e-06	0.000104539	Yes
GNG13	Q9P2W3	Guanine nucleotide-binding protein G(I)/G(S)/G(O) subunit gamma-13	-3.81222	2.44602e-05	0.000890204	Yes
GPHN	Q9NQX3	Gephyrin;Molybdopterin adenylyltransferase;Molybdopterin molybdenumtransferase	-1.70265	0.000972616	0.0139779	Yes
GRB2	P62993	Growth factor receptor-bound protein 2	-5.1828	3.50665e-06	0.000176384	Yes
GRHPR	Q9UBQ7	Glyoxylate reductase/hydroxypyruvate reductase	-1.7235	6.93095e-06	0.000305813	Yes
GRM7	Q14831	Metabotropic glutamate receptor 7	3.1532	0.00400581	0.0336943	Yes
GYG1	P46976	Glycogenin-1	-6.38574	4.06738e-09	5.11474e-06	Yes
HCN2	Q9UL51	Potassium/sodium hyperpolarization-activated cyclic nucleotide-gated channel 2	-4.04159	4.23705e-07	4.26247e-05	Yes
HDAC11	Q96DB2	Histone deacetylase 11	-3.22887	0.00222182	0.0236775	Yes
HDHD1	Q08623	Pseudouridine-5-phosphatase	-4.52132	1.23951e-06	8.4253e-05	Yes
HECTD3	Q5T447	E3 ubiquitin-protein ligase HECTD3	-2.50616	0.00674483	0.0427373	Yes
HERC4	Q5GLZ8	Probable E3 ubiquitin-protein ligase HERC4	-3.92182	3.70666e-06	0.000178673	Yes
HIBADH	P31937	3-hydroxyisobutyrate dehydrogenase, mitochondrial	-4.86979	0.00176108	0.0201912	Yes
HIST1H4A	P62805	Histone H4	1.84823	0.000361258	0.00721082	Yes
HIST2H3A	Q71DI3	Histone H3.2;Histone H3.3;Histone H3.1;Histone H3.3C;Histone H3.1t	1.95323	0.000625041	0.0102077	Yes
HNMT	P50135	Histamine N-methyltransferase	-4.19729	0.00748419	0.0447096	Yes
HNRNPA2B1	P22626	Heterogeneous nuclear ribonucleoproteins A2/B1	1.65767	9.73655e-05	0.00284738	Yes
HPRT1	P00492	Hypoxanthine-guanine phosphoribosyltransferase	-1.95271	0.00110045	0.0149927	Yes
HRSP12	P52758	Ribonuclease UK114	-6.71445	2.38832e-05	0.000883328	Yes
HSD17B10	Q99714	3-hydroxyacyl-CoA dehydrogenase type-2	-2.0654	0.00158309	0.0187805	Yes
HSD17B8	Q92506	Estradiol 17-beta-dehydrogenase 8	-4.99274	1.15474e-07	2.75934e-05	Yes
HSPA2	P54652	Heat shock-related 70 kDa protein 2	-2.36482	0.00527604	0.0382399	Yes
HSPE1	P61604	10 kDa heat shock protein, mitochondrial	-3.66101	0.00144699	0.017666	Yes
IDH3G	P51553	Isocitrate dehydrogenase [NAD] subunit gamma, mitochondrial	-4.48023	0.00473632	0.035879	Yes
ILF2	Q12905	Interleukin enhancer-binding factor 2	-1.62417	0.000394945	0.0076999	Yes
JAM3	Q9BX67	Junctional adhesion molecule C	-5.15006	9.54842e-09	8.00476e-06	Yes
KCNA1	Q09470	Potassium voltage-gated channel subfamily A member 1	-3.71539	0.00683356	0.0427373	Yes
KIAA1217	Q5T5P2	Sickle tail protein homolog	1.66961	0.000268256	0.00576952	Yes
L2HGDH	Q9H9P8	L-2-hydroxyglutarate dehydrogenase, mitochondrial	-4.8467	4.63341e-07	4.31593e-05	Yes
LCMT1	Q9UIC8	Leucine carboxyl methyltransferase 1	-4.33352	8.23363e-07	6.09047e-05	Yes
LGI1	O95970	Leucine-rich glioma-inactivated protein 1	-1.92845	0.0051171	0.0376213	Yes
LGI3	Q8N145	Leucine-rich repeat LGI family member 3	-5.1467	0.000750403	0.0116498	Yes
LGI4	Q8N135	Leucine-rich repeat LGI family member 4	-3.3576	1.71221e-05	0.000662493	Yes
LRRC16A	Q5VZK9	Leucine-rich repeat-containing protein 16A	-3.05462	0.00109827	0.0149927	Yes
LRRC8A	Q8IWT6	Volume-regulated anion channel subunit LRRC8A	-3.41839	0.00193533	0.0213295	Yes
LUC7L2	Q9Y383	Putative RNA-binding protein Luc7-like 2	3.57531	0.00640653	0.0413139	Yes
LZIC	Q8WZA0	Protein LZIC	-4.93857	0.00229356	0.0241351	Yes
MAG	P20916	Myelin-associated glycoprotein	-2.0821	0.00140206	0.0173703	Yes
MARCKS	P29966	Myristoylated alanine-rich C-kinase substrate	-2.39517	0.00025552	0.00558812	Yes
METTL7A	Q9H8H3	Methyltransferase-like protein 7A	-5.3469	3.21889e-06	0.000167524	Yes
MPI	P34949	Mannose-6-phosphate isomerase	-4.36092	0.00801142	0.0463189	Yes
MRPL12	P52815	39S ribosomal protein L12, mitochondrial	-1.61077	0.00326699	0.0296624	Yes
MRPL49	Q13405	39S ribosomal protein L49, mitochondrial	-3.68365	0.00736366	0.0443053	Yes
MRPS27	Q92552	28S ribosomal protein S27, mitochondrial	-4.06277	0.000569807	0.00965492	Yes
MRPS36	P82909	28S ribosomal protein S36, mitochondrial	-5.54412	4.54493e-07	4.31593e-05	Yes
MTMR9	Q96QG7	Myotubularin-related protein 9	4.76389	3.07363e-06	0.000166817	Yes
MT-ND1	P03886	NADH-ubiquinone oxidoreductase chain 1	-4.47932	0.00793367	0.0462951	Yes
MTX2	O75431	Metaxin-2	-4.17421	0.00655119	0.0418179	Yes
MXRA7	P84157	Matrix-remodeling-associated protein 7	-3.9433	0.00371368	0.0320959	Yes
MYO6	Q9UM54	Unconventional myosin-VI	-1.83009	0.00108254	0.0149592	Yes
NADK2	Q4G0N4	NAD kinase 2, mitochondrial	-4.0211	0.00747512	0.0447096	Yes
NAMPT	P43490	Nicotinamide phosphoribosyltransferase	2.05301	0.00557676	0.0387446	Yes
NAPEPLD	Q6IQ20	N-acyl-phosphatidylethanolamine-hydrolyzing phospholipase D	-4.54769	1.6766e-06	0.000104539	Yes
NARS	O43776	Asparagine--tRNA ligase, cytoplasmic	-2.1955	3.70708e-05	0.0011953	Yes
NAV1	Q8NEY1	Neuron navigator 1	3.39269	0.00308594	0.0287449	Yes
NDRG2	Q9UN36	Protein NDRG2	-2.24116	0.00112854	0.0150745	Yes
NDUFB7	P17568	NADH dehydrogenase [ubiquinone] 1 beta subcomplex subunit 7	-1.63915	0.00125948	0.0162441	Yes
NDUFS4	O43181	NADH dehydrogenase [ubiquinone] iron-sulfur protein 4, mitochondrial	-1.94178	0.000448756	0.00823812	Yes
NDUFV1	P49821	NADH dehydrogenase [ubiquinone] flavoprotein 1, mitochondrial	-1.61218	0.000409444	0.00770764	Yes
NDUFV2	P19404	NADH dehydrogenase [ubiquinone] flavoprotein 2, mitochondrial	-1.53808	0.00444708	0.0346882	Yes
NID1	P14543	Nidogen-1	3.96472	0.00366261	0.0319842	Yes
NIPSNAP3A	Q9UFN0	Protein NipSnap homolog 3A	-6.3766	2.54942e-07	3.37463e-05	Yes
NONO	Q15233	Non-POU domain-containing octamer-binding protein	1.68161	0.000447267	0.00823812	Yes
NPLOC4	Q8TAT6	Nuclear protein localization protein 4 homolog	-3.25044	0.00762365	0.0452458	Yes
NUCKS1	Q9H1E3	Nuclear ubiquitous casein and cyclin-dependent kinase substrate 1	-5.41322	5.10408e-06	0.000233396	Yes
NUDT3	O95989	Diphosphoinositol polyphosphate phosphohydrolase 1	-4.40958	0.0011088	0.0149927	Yes
OGFRL1	Q5TC84	Opioid growth factor receptor-like protein 1	-4.03897	5.26439e-07	4.72855e-05	Yes
OPALIN	Q96PE5	Opalin	-3.81704	8.91768e-07	6.22999e-05	Yes
OXR1	Q8N573	Oxidation resistance protein 1	-2.82607	0.0011267	0.0150745	Yes
PABPC1	P11940	Polyadenylate-binding protein 1;Polyadenylate-binding protein 3	-1.66366	0.0010038	0.0142311	Yes
PADI2	Q9Y2J8	Protein-arginine deiminase type-2	-5.22479	0.000572001	0.00965492	Yes
PAFAH1B3	Q15102	Platelet-activating factor acetylhydrolase IB subunit gamma	2.04803	9.90868e-05	0.00286441	Yes
PAICS	P22234	Multifunctional protein ADE2;Phosphoribosylaminoimidazole-succinocarboxamide synthase;Phosphoribosylaminoimidazole carboxylase	-1.68222	0.00234208	0.0243218	Yes
PARK7	Q99497	Protein deglycase DJ-1	-2.16537	0.00030776	0.00639684	Yes
PCK2	Q16822	Phosphoenolpyruvate carboxykinase [GTP], mitochondrial	2.62862	0.000111717	0.00308757	Yes
PCMT1	P22061	Protein-L-isoaspartate(D-aspartate) O-methyltransferase	-1.76256	0.00438186	0.0346882	Yes
PDHA1	P08559	Pyruvate dehydrogenase E1 component subunit alpha, somatic form, mitochondrial	-1.63726	0.00649134	0.0417043	Yes
PEBP1	P30086	Phosphatidylethanolamine-binding protein 1;Hippocampal cholinergic neurostimulating peptide	-1.86834	2.47771e-05	0.000890204	Yes
PGAM5	Q96HS1	Serine/threonine-protein phosphatase PGAM5, mitochondrial	-4.81345	4.69443e-06	0.000218639	Yes
PGP	A6NDG6	Phosphoglycolate phosphatase	-3.80657	4.20766e-07	4.26247e-05	Yes
PIK3R2	O00459	Phosphatidylinositol 3-kinase regulatory subunit beta	4.1484	0.000108591	0.00303452	Yes
PKM	P14618	Pyruvate kinase PKM	-2.50585	3.59671e-05	0.00117477	Yes
PMP2	P02689	Myelin P2 protein	-3.35623	0.00513085	0.0376213	Yes
PNP	P00491	Purine nucleoside phosphorylase	-4.23475	0.000500731	0.00899488	Yes
PNPLA8	Q9NP80	Calcium-independent phospholipase A2-gamma	-3.00061	1.0589e-05	0.000443857	Yes
PPIA	P62937	Peptidyl-prolyl cis-trans isomerase A;Peptidyl-prolyl cis-trans isomerase A, N-terminally processed	1.81027	0.00233843	0.0243218	Yes
PPP1R1B	Q9UD71	Protein phosphatase 1 regulatory subunit 1B	-5.48308	2.20516e-07	3.24657e-05	Yes
PPP1R7	Q15435	Protein phosphatase 1 regulatory subunit 7	-1.94186	0.00175549	0.0201912	Yes
PPP2R5A	Q15172	Serine/threonine-protein phosphatase 2A 56 kDa regulatory subunit alpha isoform	-2.84912	0.00458606	0.0351399	Yes
PPP3CA	Q08209	Serine/threonine-protein phosphatase 2B catalytic subunit alpha isoform	-1.93374	0.0041184	0.0340716	Yes
PPP3R1	P63098	Calcineurin subunit B type 1	-2.17435	0.0019171	0.0213295	Yes
PRDX6	P30041	Peroxiredoxin-6	-3.55305	1.23982e-05	0.000511172	Yes
PREPL	Q4J6C6	Prolyl endopeptidase-like	-1.81553	0.000206811	0.00472845	Yes
PREX1	Q8TCU6	Phosphatidylinositol 3,4,5-trisphosphate-dependent Rac exchanger 1 protein	-4.3757	5.31463e-06	0.000238684	Yes
PRMT5	O14744	Protein arginine N-methyltransferase 5;Protein arginine N-methyltransferase 5, N-terminally processed	-5.88789	1.4263e-07	2.75934e-05	Yes
PSD3	Q9NYI0	PH and SEC7 domain-containing protein 3	1.82398	0.00052841	0.00928749	Yes
PSMB7	Q99436	Proteasome subunit beta type-7	-4.13363	0.00781274	0.045802	Yes
PSME1	Q06323	Proteasome activator complex subunit 1	-4.02647	0.0052584	0.0382222	Yes
PTCD3	Q96EY7	Pentatricopeptide repeat domain-containing protein 3, mitochondrial	-3.56765	3.76528e-06	0.000178673	Yes
PTGDS	P41222	Prostaglandin-H2 D-isomerase	-5.85322	3.58449e-06	0.000176765	Yes
PTPN1	P18031	Tyrosine-protein phosphatase non-receptor type 1	4.17142	0.00684816	0.0427373	Yes
QDPR	P09417	Dihydropteridine reductase	-1.62534	0.00650023	0.0417043	Yes
RAB11FIP2	Q7L804	Rab11 family-interacting protein 2	3.82607	0.00226952	0.0239825	Yes
RABL6	Q3YEC7	Rab-like protein 6	-3.69696	0.00687888	0.0428227	Yes
RAP1A	P62834	Ras-related protein Rap-1A	2.88092	0.00732919	0.0442036	Yes
RBBP4	Q09028	Histone-binding protein RBBP4	5.17863	1.59848e-08	9.38481e-06	Yes
RBMX	P38159	RNA-binding motif protein, X chromosome;RNA-binding motif protein, X chromosome, N-terminally processed	3.75223	0.00653598	0.0418179	Yes
RBSN	Q9H1K0	Rabenosyn-5	3.32946	5.45254e-05	0.00171414	Yes
RDX	P35241	Radixin	-4.56009	0.00133752	0.0166528	Yes
S100A1	P23297	Protein S100-A1	-3.19844	8.30422e-05	0.00252751	Yes
S100B	P04271	Protein S100-B	-5.63831	1.42813e-05	0.000579315	Yes
SCG3	Q8WXD2	Secretogranin-3	-4.36898	6.72376e-07	5.63675e-05	Yes
SCN1A	P35498	Sodium channel protein type 1 subunit alpha	-3.22668	0.00323144	0.0296412	Yes
SELENBP1	Q13228	Selenium-binding protein 1	-3.07005	0.000105904	0.00301778	Yes
SEPT4	O43236	Septin-4	-1.86999	0.000458611	0.00835801	Yes
SERPINB9	P50453	Serpin B9	-3.26238	0.00441957	0.0346882	Yes
SERPINF1	P36955	Pigment epithelium-derived factor	-4.5959	3.26388e-06	0.000167524	Yes
SERPINI1	Q99574	Neuroserpin	-4.9945	4.09539e-07	4.26247e-05	Yes
SGIP1	Q9BQI5	SH3-containing GRB2-like protein 3-interacting protein 1	-2.94328	0.000356094	0.00721082	Yes
SH3BGRL	O75368	SH3 domain-binding glutamic acid-rich-like protein	-4.3616	9.64208e-05	0.00284738	Yes
SIRT2	Q8IXJ6	NAD-dependent protein deacetylase sirtuin-2	-1.55704	0.00679526	0.0427373	Yes
SKIV2L	Q15477	Helicase SKI2W	-2.34982	0.00452853	0.0349364	Yes
SKP1	P63208	S-phase kinase-associated protein 1	-1.61889	0.00015578	0.00397317	Yes
SLC1A2	P43004	Excitatory amino acid transporter 2	-2.70772	0.00147645	0.017832	Yes
SLC1A3	P43003	Excitatory amino acid transporter 1	-2.55977	0.000167489	0.00401176	Yes
SLC25A18	Q9H1K4	Mitochondrial glutamate carrier 2	-3.70037	2.75934e-06	0.000154216	Yes
SLC27A1	Q6PCB7	Long-chain fatty acid transport protein 1	-4.99614	5.94676e-07	5.15727e-05	Yes
SLC4A1	P02730	Band 3 anion transport protein	3.96363	0.0062545	0.0408573	Yes
SLC4A4	Q9Y6R1	Electrogenic sodium bicarbonate cotransporter 1	-1.92019	0.000766698	0.0117576	Yes
SLC7A5	Q01650	Large neutral amino acids transporter small subunit 1	1.81964	0.00234998	0.0243218	Yes
SLC9A3R1	O14745	Na(+)/H(+) exchange regulatory cofactor NHE-RF1	-3.44899	0.00707574	0.0434461	Yes
SMAP1	Q8IYB5	Stromal membrane-associated protein 1	-4.19398	0.00825969	0.0473192	Yes
SNCA	P37840	Alpha-synuclein	-1.73816	0.000485298	0.00878075	Yes
SNCB	Q16143	Beta-synuclein	-2.0824	0.000215519	0.00483956	Yes
SNCG	O76070	Gamma-synuclein	-3.2851	4.19033e-05	0.00133401	Yes
SPR	P35270	Sepiapterin reductase	-4.00389	0.00368342	0.0320547	Yes
SPTB	P11277	Spectrin beta chain, erythrocytic	1.87199	0.00132827	0.0166528	Yes
SRI	P30626	Sorcin	-3.74846	1.5102e-05	0.00060288	Yes
SSR4	P51571	Translocon-associated protein subunit delta	-4.44187	1.25298e-07	2.75934e-05	Yes
ST13	P50502	Hsc70-interacting protein;Putative protein FAM10A5;Putative protein FAM10A4	-2.25495	0.000268403	0.00576952	Yes
STIP1	P31948	Stress-induced-phosphoprotein 1	-2.46328	0.000159391	0.00400868	Yes
STX8	Q9UNK0	Syntaxin-8	-3.19736	0.00814888	0.0468454	Yes
SYNM	O15061	Synemin	2.36221	0.00763379	0.0452458	Yes
SYT2	Q8N9I0	Synaptotagmin-2	-5.83348	7.89636e-06	0.000336599	Yes
TERF2IP	Q9NYB0	Telomeric repeat-binding factor 2-interacting protein 1	4.26451	1.80766e-06	0.000105727	Yes
TF	P02787	Serotransferrin	-5.2973	0.00489257	0.0368407	Yes
TIMM13	Q9Y5L4	Mitochondrial import inner membrane translocase subunit Tim13	-5.06675	0.00279298	0.0270167	Yes
TMEM126A	Q9H061	Transmembrane protein 126A	-3.55722	0.00535798	0.0382822	Yes
TMEM163	Q8TC26	Transmembrane protein 163	4.17817	0.0057271	0.0391404	Yes
TMEM33	P57088	Transmembrane protein 33	-3.40489	1.71825e-06	0.000104539	Yes
TNC	P24821	Tenascin	7.08338	0.000367344	0.00727456	Yes
TPM1	P09493	Tropomyosin alpha-1 chain	-2.52503	0.00709993	0.0434461	Yes
TPM3	P06753	Tropomyosin alpha-3 chain	-1.93198	0.00450482	0.0348604	Yes
TPM4	P67936	Tropomyosin alpha-4 chain	-1.89483	0.000407327	0.00770764	Yes
TPP1	O14773	Tripeptidyl-peptidase 1	-5.75637	2.0668e-07	3.24657e-05	Yes
TPT1	P13693	Translationally-controlled tumor protein	-1.73252	0.00477992	0.0361006	Yes
TXNRD2	Q9NNW7	Thioredoxin reductase 2, mitochondrial	4.6627	0.00234516	0.0243218	Yes
UQCRB	P14927	Cytochrome b-c1 complex subunit 7	-1.7253	0.000156399	0.00397317	Yes
VAT1L	Q9HCJ6	Synaptic vesicle membrane protein VAT-1 homolog-like	-2.27837	0.000531769	0.00928749	Yes
VBP1	P61758	Prefoldin subunit 3	-4.82928	3.47733e-07	4.16452e-05	Yes
VWA1	Q6PCB0	von Willebrand factor A domain-containing protein 1	1.96631	0.00521183	0.038104	Yes
ZFYVE21	Q9BQ24	Zinc finger FYVE domain-containing protein 21	-4.96726	6.94357e-08	2.49473e-05	Yes
A2M	P01023	Alpha-2-macroglobulin	-0.625314	0.550975	0.654559	No
AAK1	Q2M2I8	AP2-associated protein kinase 1	0.236353	0.33152	0.459632	No
AARS	P49588	Alanine--tRNA ligase, cytoplasmic	0.542071	0.026314	0.0897273	No
AARSD1	Q9BTE6	Alanyl-tRNA editing protein Aarsd1	0.232182	0.620748	0.713846	No
AASDHPPT	Q9NRN7	L-aminoadipate-semialdehyde dehydrogenase-phosphopantetheinyl transferase	-0.168714	0.485445	0.597599	No
ABAT	P80404	4-aminobutyrate aminotransferase, mitochondrial	-1.15635	0.00253814	0.0254319	No
ABCB7	O75027	ATP-binding cassette sub-family B member 7, mitochondrial	-0.932272	0.417139	0.537726	No
ABCB8	Q9NUT2	ATP-binding cassette sub-family B member 8, mitochondrial	-0.970034	0.376496	0.498866	No
ABCE1	P61221	ATP-binding cassette sub-family E member 1	0.17046	0.442105	0.559022	No
ABCF1	Q8NE71	ATP-binding cassette sub-family F member 1	0.334482	0.247243	0.373687	No
ABCF3	Q9NUQ8	ATP-binding cassette sub-family F member 3	-1.83181	0.0814858	0.18249	No
ABHD11	Q8NFV4	Alpha/beta hydrolase domain-containing protein 11	-0.206394	0.53797	0.644283	No
ABHD16A	O95870	Abhydrolase domain-containing protein 16A	0.473537	0.0701018	0.165645	No
ABI1	Q8IZP0	Abl interactor 1	0.22884	0.485691	0.597609	No
ABI2	Q9NYB9	Abl interactor 2	0.233528	0.535038	0.641688	No
ABLIM1	O14639	Actin-binding LIM protein 1	-0.823897	0.0239568	0.085392	No
ABLIM2	Q6H8Q1	Actin-binding LIM protein 2	-0.0913323	0.703399	0.778679	No
ABLIM3	O94929	Actin-binding LIM protein 3	1.47035	0.117033	0.231762	No
ABR	Q12979	Active breakpoint cluster region-related protein	0.657015	0.0180314	0.0716323	No
ACAA1	P09110	3-ketoacyl-CoA thiolase, peroxisomal	-2.59029	0.0100709	0.0536646	No
ACAA2	P42765	3-ketoacyl-CoA thiolase, mitochondrial	-1.13817	0.000507862	0.00899488	No
ACACA	Q13085	Acetyl-CoA carboxylase 1;Biotin carboxylase	0.20798	0.310484	0.437951	No
ACAD8	Q9UKU7	Isobutyryl-CoA dehydrogenase, mitochondrial	-1.00938	0.0110595	0.056078	No
ACAD9	Q9H845	Acyl-CoA dehydrogenase family member 9, mitochondrial	-1.38061	0.0049899	0.0372392	No
ACADM	P11310	Medium-chain specific acyl-CoA dehydrogenase, mitochondrial	-0.966536	0.0118323	0.058579	No
ACADS	P16219	Short-chain specific acyl-CoA dehydrogenase, mitochondrial	-1.73562	0.192768	0.317701	No
ACADSB	P45954	Short/branched chain specific acyl-CoA dehydrogenase, mitochondrial	-0.503712	0.0949332	0.201313	No
ACADVL	P49748	Very long-chain specific acyl-CoA dehydrogenase, mitochondrial	-0.857949	0.00361785	0.0319259	No
ACAN	P16112	Aggrecan core protein;Aggrecan core protein 2	-0.246315	0.529807	0.636325	No
ACAT1	P24752	Acetyl-CoA acetyltransferase, mitochondrial	-0.918259	0.0127622	0.0606746	No
ACBD5	Q5T8D3	Acyl-CoA-binding domain-containing protein 5	0.853366	0.335782	0.463751	No
ACBD7	Q8N6N7	Acyl-CoA-binding domain-containing protein 7	-2.3523	0.139516	0.257091	No
ACLY	P53396	ATP-citrate synthase	-0.392246	0.139207	0.257053	No
ACO1	P21399	Cytoplasmic aconitate hydratase	-1.38484	0.0144352	0.0637972	No
ACOT13	Q9NPJ3	Acyl-coenzyme A thioesterase 13;Acyl-coenzyme A thioesterase 13, N-terminally processed	-3.57026	0.0111977	0.0563244	No
ACSBG1	Q96GR2	Long-chain-fatty-acid--CoA ligase ACSBG1	-4.16013	0.0108169	0.0550697	No
ACSF3	Q4G176	Acyl-CoA synthetase family member 3, mitochondrial	-3.01689	0.0663806	0.160893	No
ACSL1	P33121	Long-chain-fatty-acid--CoA ligase 1	3.51195	0.0227814	0.0831978	No
ACSL3	O95573	Long-chain-fatty-acid--CoA ligase 3	0.387644	0.322156	0.450624	No
ACSL6	Q9UKU0	Long-chain-fatty-acid--CoA ligase 6	-0.507484	0.0890391	0.193882	No
ACSS1	Q9NUB1	Acetyl-coenzyme A synthetase 2-like, mitochondrial	-2.67075	0.0158955	0.0673016	No
ACTC1	P68032	Actin, alpha cardiac muscle 1;Actin, gamma-enteric smooth muscle;Actin, aortic smooth muscle;Actin, alpha skeletal muscle	-0.327635	0.547044	0.650504	No
ACTN1	P12814	Alpha-actinin-1	-0.62628	0.152988	0.273464	No
ACTN2	P35609	Alpha-actinin-2	-0.25411	0.703992	0.778679	No
ACTN4	O43707	Alpha-actinin-4	-0.643832	0.147393	0.268111	No
ACTR1A	P61163	Alpha-centractin	-0.832825	0.00618948	0.0405379	No
ACTR1B	P42025	Beta-centractin	-2.11067	0.144996	0.264826	No
ACTR2	P61160	Actin-related protein 2	-0.895193	0.0233344	0.084198	No
ACTR3	P61158	Actin-related protein 3	-0.981689	0.00815837	0.0468454	No
ACTR3B	Q9P1U1	Actin-related protein 3B	-1.91591	0.245681	0.371998	No
ACYP2	P14621	Acylphosphatase-2	-0.650439	0.104947	0.215288	No
ADAM11	O75078	Disintegrin and metalloproteinase domain-containing protein 11	-1.3601	0.26249	0.389911	No
ADAM22	Q9P0K1	Disintegrin and metalloproteinase domain-containing protein 22	-0.400844	0.166506	0.288602	No
ADAM23	O75077	Disintegrin and metalloproteinase domain-containing protein 23	-0.262098	0.369692	0.493017	No
ADAP1	O75689	Arf-GAP with dual PH domain-containing protein 1	1.05433	0.00131608	0.0166329	No
ADAR	P55265	Double-stranded RNA-specific adenosine deaminase	-0.90627	0.529184	0.636185	No
ADD1	P35611	Alpha-adducin	-0.857693	0.028295	0.0942665	No
ADD2	P35612	Beta-adducin	-0.96339	0.0387818	0.115428	No
ADD3	Q9UEY8	Gamma-adducin	-1.46842	7.08273e-05	0.00219914	No
ADRBK1	P25098	Beta-adrenergic receptor kinase 1	0.302562	0.0813487	0.182466	No
ADRM1	Q16186	Proteasomal ubiquitin receptor ADRM1	-0.381549	0.418633	0.538824	No
ADSS	P30520	Adenylosuccinate synthetase isozyme 2	-0.693617	0.0186117	0.0729101	No
AFG3L2	Q9Y4W6	AFG3-like protein 2	0.102202	0.543257	0.647839	No
AGAP1	Q9UPQ3	Arf-GAP with GTPase, ANK repeat and PH domain-containing protein 1	1.68133	0.185768	0.308999	No
AGAP3	Q96P47	Arf-GAP with GTPase, ANK repeat and PH domain-containing protein 3	0.863831	0.0059755	0.0401412	No
AGFG1	P52594	Arf-GAP domain and FG repeat-containing protein 1	-0.445465	0.394937	0.516041	No
AGRN	O00468	Agrin;Agrin N-terminal 110 kDa subunit;Agrin C-terminal 110 kDa subunit;Agrin C-terminal 90 kDa fragment;Agrin C-terminal 22 kDa fragment	1.03049	0.00897582	0.0505015	No
AGTPBP1	Q9UPW5	Cytosolic carboxypeptidase 1	0.264602	0.358697	0.484491	No
AHCYL2	Q96HN2	Putative adenosylhomocysteinase 3	-3.96061	0.0149957	0.0651367	No
AHNAK	Q09666	Neuroblast differentiation-associated protein AHNAK	-1.21394	0.117956	0.233222	No
AHSA1	O95433	Activator of 90 kDa heat shock protein ATPase homolog 1	0.114965	0.743652	0.811051	No
AIFM1	O95831	Apoptosis-inducing factor 1, mitochondrial	-0.205264	0.299496	0.426277	No
AIMP1	Q12904	Aminoacyl tRNA synthase complex-interacting multifunctional protein 1;Endothelial monocyte-activating polypeptide 2	0.328905	0.161591	0.28301	No
AIP	O00170	AH receptor-interacting protein	0.534471	0.0988676	0.207729	No
AK1	P00568	Adenylate kinase isoenzyme 1	0.0631223	0.710853	0.784121	No
AK4	P27144	Adenylate kinase 4, mitochondrial	-0.100921	0.715029	0.787691	No
AK5	Q9Y6K8	Adenylate kinase isoenzyme 5	0.219148	0.285393	0.41205	No
AKAP10	O43572	A-kinase anchor protein 10, mitochondrial	0.445246	0.0778303	0.177585	No
AKAP12	Q02952	A-kinase anchor protein 12	-0.481903	0.180138	0.30183	No
AKAP5	P24588	A-kinase anchor protein 5	0.364282	0.355111	0.482237	No
AKAP7	O43687	A-kinase anchor protein 7 isoforms alpha and beta;A-kinase anchor protein 7 isoform gamma	-0.981689	0.470241	0.583452	No
AKR1A1	P14550	Alcohol dehydrogenase [NADP(+)]	0.35767	0.186997	0.310223	No
AKR1B1	P15121	Aldose reductase	-2.75716	0.0194863	0.0748215	No
AKR1D1	P51857	3-oxo-5-beta-steroid 4-dehydrogenase	-0.428686	0.749018	0.815137	No
AKT3	Q9Y243	RAC-gamma serine/threonine-protein kinase	-1.23252	0.320124	0.44828	No
ALAD	P13716	Delta-aminolevulinic acid dehydratase	-2.52514	0.0793828	0.180188	No
ALCAM	Q13740	CD166 antigen	0.803092	0.00355999	0.031526	No
ALDH1B1	P30837	Aldehyde dehydrogenase X, mitochondrial	-2.34537	0.172117	0.294206	No
ALDH1L1	O75891	Cytosolic 10-formyltetrahydrofolate dehydrogenase	-0.34807	0.277302	0.404299	No
ALDH3A2	P51648	Fatty aldehyde dehydrogenase	0.159383	0.622687	0.715655	No
ALDH6A1	Q02252	Methylmalonate-semialdehyde dehydrogenase [acylating], mitochondrial	-0.325543	0.348849	0.476048	No
AMPD2	Q01433	AMP deaminase 2	-2.01866	0.115291	0.229216	No
AMPH	P49418	Amphiphysin	-0.878118	0.0323237	0.103809	No
ANK1	P16157	Ankyrin-1	0.670024	0.0523063	0.13862	No
ANK2	Q01484	Ankyrin-2	0.21624	0.358538	0.484491	No
ANK3	Q12955	Ankyrin-3	0.282763	0.224039	0.349975	No
ANKFY1	Q9P2R3	Rabankyrin-5	0.233919	0.314972	0.442297	No
ANKMY2	Q8IV38	Ankyrin repeat and MYND domain-containing protein 2	0.241276	0.419692	0.53991	No
ANKS1B	Q7Z6G8	Ankyrin repeat and sterile alpha motif domain-containing protein 1B	-0.518052	0.494979	0.605483	No
ANLN	Q9NQW6	Actin-binding protein anillin	-2.36727	0.0167463	0.0689647	No
ANP32A	P39687	Acidic leucine-rich nuclear phosphoprotein 32 family member A	-0.814305	0.00909634	0.0507257	No
ANXA1	P04083	Annexin A1	1.1254	0.0226823	0.0831574	No
ANXA11	P50995	Annexin A11	-0.476105	0.223124	0.348978	No
ANXA2	P07355	Annexin A2;Putative annexin A2-like protein	1.21079	0.118826	0.234456	No
ANXA3	P12429	Annexin A3	0.0485555	0.884087	0.91911	No
ANXA4	P09525	Annexin A4	-0.501285	0.283459	0.41042	No
ANXA5	P08758	Annexin A5	0.811948	0.0868238	0.190711	No
ANXA6	P08133	Annexin A6	0.206268	0.346464	0.475008	No
ANXA7	P20073	Annexin A7	-0.126579	0.544471	0.648929	No
AP1B1	Q10567	AP-1 complex subunit beta-1	-0.423706	0.182225	0.304112	No
AP1G1	O43747	AP-1 complex subunit gamma-1	0.156491	0.450277	0.565094	No
AP1M1	Q9BXS5	AP-1 complex subunit mu-1	0.275996	0.418603	0.538824	No
AP1S1	P61966	AP-1 complex subunit sigma-1A	-0.889798	0.0610575	0.153378	No
AP2A1	O95782	AP-2 complex subunit alpha-1	-0.0907364	0.735418	0.80415	No
AP2A2	O94973	AP-2 complex subunit alpha-2	-0.227153	0.453241	0.56768	No
AP2B1	P63010	AP-2 complex subunit beta	-0.0223914	0.95257	0.968356	No
AP2M1	Q96CW1	AP-2 complex subunit mu	-0.39535	0.330982	0.45914	No
AP2S1	P53680	AP-2 complex subunit sigma	-0.608375	0.103184	0.213055	No
AP3B1	O00203	AP-3 complex subunit beta-1	0.413101	0.135418	0.253309	No
AP3B2	Q13367	AP-3 complex subunit beta-2	0.211676	0.335553	0.46369	No
AP3D1	O14617	AP-3 complex subunit delta-1	-0.0353629	0.90607	0.935838	No
AP3M1	Q9Y2T2	AP-3 complex subunit mu-1	-1.24379	0.317893	0.445476	No
AP3M2	P53677	AP-3 complex subunit mu-2	-0.772982	0.0951358	0.201342	No
AP3S1	Q92572	AP-3 complex subunit sigma-1	-2.69854	0.0438375	0.1236	No
APBA1	Q02410	Amyloid beta A4 precursor protein-binding family A member 1	-3.28872	0.014265	0.0633861	No
APBB1	O00213	Amyloid beta A4 precursor protein-binding family B member 1	-0.707231	0.518834	0.626127	No
APEX1	P27695	DNA-(apurinic or apyrimidinic site) lyase;DNA-(apurinic or apyrimidinic site) lyase, mitochondrial	2.61328	0.0389184	0.115697	No
API5	Q9BZZ5	Apoptosis inhibitor 5	-2.88197	0.122971	0.239233	No
APLP1	P51693	Amyloid-like protein 1;C30	-1.34398	0.364675	0.48954	No
APMAP	Q9HDC9	Adipocyte plasma membrane-associated protein	0.301008	0.198349	0.323506	No
APOA1	P02647	Apolipoprotein A-I;Proapolipoprotein A-I;Truncated apolipoprotein A-I	1.18955	0.378346	0.499759	No
APOA1BP	Q8NCW5	NAD(P)H-hydrate epimerase	-3.22869	0.025557	0.0881383	No
APOA2	P02652	Apolipoprotein A-II;Proapolipoprotein A-II;Truncated apolipoprotein A-II	1.76917	0.305301	0.432455	No
APOD	P05090	Apolipoprotein D	-3.40047	0.0399141	0.117683	No
APOE	P02649	Apolipoprotein E	-0.668374	0.0159265	0.0673198	No
APOL2	Q9BQE5	Apolipoprotein L2	-0.544149	0.349241	0.476324	No
APOO	Q9BUR5	Apolipoprotein O	-0.247178	0.484491	0.596716	No
APOOL	Q6UXV4	MICOS complex subunit MIC27	0.375212	0.0997498	0.208711	No
APP	P05067	Amyloid beta A4 protein;N-APP;Soluble APP-alpha;Soluble APP-beta;C99;Beta-amyloid protein 42;Beta-amyloid protein 40;C83;P3(42);P3(40);C80;Gamma-secretase C-terminal fragment 59;Gamma-secretase C-terminal fragment 57;Gamma-secretase C-terminal fragment 50;C31	-0.383651	0.185378	0.308555	No
APPL1	Q9UKG1	DCC-interacting protein 13-alpha	-0.12946	0.728787	0.798649	No
AQP4	P55087	Aquaporin-4	-0.669017	0.279481	0.406063	No
ARCN1	P48444	Coatomer subunit delta	0.113043	0.686736	0.765237	No
ARF4	P18085	ADP-ribosylation factor 4	3.92849	0.0132009	0.0620565	No
ARFGAP1	Q8N6T3	ADP-ribosylation factor GTPase-activating protein 1	-0.398381	0.375811	0.498242	No
ARFGAP2	Q8N6H7	ADP-ribosylation factor GTPase-activating protein 2	0.740156	0.0125115	0.0600111	No
ARFGEF2	Q9Y6D5	Brefeldin A-inhibited guanine nucleotide-exchange protein 2	-0.0377261	0.881855	0.918353	No
ARFGEF3	Q5TH69	Brefeldin A-inhibited guanine nucleotide-exchange protein 3	0.533959	0.0825832	0.183965	No
ARFIP2	P53365	Arfaptin-2	-0.356255	0.152778	0.27336	No
ARHGAP1	Q07960	Rho GTPase-activating protein 1	0.766174	0.00533173	0.0382822	No
ARHGAP21	Q5T5U3	Rho GTPase-activating protein 21	0.488587	0.136461	0.254221	No
ARHGAP26	Q9UNA1	Rho GTPase-activating protein 26	-0.103569	0.78548	0.844599	No
ARHGAP32	A7KAX9	Rho GTPase-activating protein 32	0.904615	0.113829	0.227027	No
ARHGAP35	Q9NRY4	Rho GTPase-activating protein 35	0.426198	0.100993	0.210612	No
ARHGAP44	Q17R89	Rho GTPase-activating protein 44	0.335529	0.139042	0.256937	No
ARHGAP5	Q13017	Rho GTPase-activating protein 5	0.0944543	0.679693	0.761438	No
ARHGDIA	P52565	Rho GDP-dissociation inhibitor 1	1.67625	0.0603855	0.153089	No
ARHGEF12	Q9NZN5	Rho guanine nucleotide exchange factor 12	0.394246	0.121402	0.237872	No
ARHGEF2	Q92974	Rho guanine nucleotide exchange factor 2	0.798288	0.0543594	0.142413	No
ARHGEF7	Q14155	Rho guanine nucleotide exchange factor 7	0.071415	0.744366	0.811479	No
ARHGEF9	O43307	Rho guanine nucleotide exchange factor 9	-1.95127	0.135007	0.253174	No
ARL15	Q9NXU5	ADP-ribosylation factor-like protein 15	0.758418	0.019003	0.0737737	No
ARL2	P36404	ADP-ribosylation factor-like protein 2	0.0374315	0.885008	0.91937	No
ARL3	P36405	ADP-ribosylation factor-like protein 3	1.07695	0.0190952	0.0738396	No
ARL6	Q9H0F7	ADP-ribosylation factor-like protein 6	-0.924595	0.366269	0.491028	No
ARL6IP5	O75915	PRA1 family protein 3	-1.71448	0.189851	0.314129	No
ARL8A	Q96BM9	ADP-ribosylation factor-like protein 8A	-1.91592	0.215522	0.341228	No
ARL8B	Q9NVJ2	ADP-ribosylation factor-like protein 8B	-1.75517	0.200745	0.325745	No
ARMC1	Q9NVT9	Armadillo repeat-containing protein 1	-1.70098	0.176225	0.298054	No
ARMC10	Q8N2F6	Armadillo repeat-containing protein 10	-0.0846821	0.61936	0.712902	No
ARMC8	Q8IUR7	Armadillo repeat-containing protein 8	-0.898862	0.00707161	0.0434461	No
ARMCX3	Q9UH62	Armadillo repeat-containing X-linked protein 3	-0.241661	0.382807	0.504337	No
ARMT1	Q9H993	Protein-glutamate O-methyltransferase	-0.315996	0.296242	0.423805	No
ARPC1A	Q92747	Actin-related protein 2/3 complex subunit 1A	-1.17449	0.00419334	0.0343526	No
ARPC2	O15144	Actin-related protein 2/3 complex subunit 2	-1.05233	0.0712095	0.167746	No
ARPC3	O15145	Actin-related protein 2/3 complex subunit 3	-0.240125	0.546605	0.650504	No
ARPC4	P59998	Actin-related protein 2/3 complex subunit 4	-1.19693	0.00179636	0.0201912	No
ASAH1	Q13510	Acid ceramidase;Acid ceramidase subunit alpha;Acid ceramidase subunit beta	-1.28782	0.00398459	0.0336283	No
ASAP1	Q9ULH1	Arf-GAP with SH3 domain, ANK repeat and PH domain-containing protein 1	-0.0257753	0.941584	0.961354	No
ASMTL	O95671	N-acetylserotonin O-methyltransferase-like protein	-2.56057	0.116925	0.231731	No
ASNA1	O43681	ATPase ASNA1	0.451434	0.0982882	0.206685	No
ASNS	P08243	Asparagine synthetase [glutamine-hydrolyzing]	-0.637397	0.538751	0.644911	No
ASPA	P45381	Aspartoacylase	-2.23459	0.0687936	0.163663	No
ASS1	P00966	Argininosuccinate synthase	-1.57618	0.211196	0.337009	No
ASTN1	O14525	Astrotactin-1	-2.12054	0.147479	0.268111	No
ATAD1	Q8NBU5	ATPase family AAA domain-containing protein 1	-2.64224	0.061412	0.153378	No
ATAD3A	Q9NVI7	ATPase family AAA domain-containing protein 3A	0.683339	0.00549381	0.0386506	No
ATAD3B	Q5T9A4	ATPase family AAA domain-containing protein 3B	2.49284	0.0795229	0.180343	No
ATAT1	Q5SQI0	Alpha-tubulin N-acetyltransferase 1	1.08339	0.00122181	0.0159476	No
ATCAY	Q86WG3	Caytaxin	-0.962971	0.094285	0.200276	No
ATG2B	Q96BY7	Autophagy-related protein 2 homolog B	-1.21051	0.356341	0.48294	No
ATG3	Q9NT62	Ubiquitin-like-conjugating enzyme ATG3	0.548866	0.0118651	0.0586263	No
ATG4B	Q9Y4P1	Cysteine protease ATG4B	0.516536	0.0180095	0.0716323	No
ATG7	O95352	Ubiquitin-like modifier-activating enzyme ATG7	-2.64446	0.0640991	0.157585	No
ATIC	P31939	Bifunctional purine biosynthesis protein PURH;Phosphoribosylaminoimidazolecarboxamide formyltransferase;IMP cyclohydrolase	0.271114	0.20697	0.332395	No
ATL1	Q8WXF7	Atlastin-1	-0.214418	0.339469	0.467843	No
ATP1A1	P05023	Sodium/potassium-transporting ATPase subunit alpha-1	-0.0902625	0.703575	0.778679	No
ATP1A2	P50993	Sodium/potassium-transporting ATPase subunit alpha-2	-1.07168	0.0138245	0.062994	No
ATP1A3	P13637	Sodium/potassium-transporting ATPase subunit alpha-3	-0.085728	0.643014	0.73275	No
ATP1B1	P05026	Sodium/potassium-transporting ATPase subunit beta-1	-0.283957	0.159313	0.280709	No
ATP1B2	P14415	Sodium/potassium-transporting ATPase subunit beta-2	-0.87976	0.0374353	0.113502	No
ATP2A2	P16615	Sarcoplasmic/endoplasmic reticulum calcium ATPase 2	-0.00706468	0.979651	0.984741	No
ATP2B1	P20020	Plasma membrane calcium-transporting ATPase 1	-0.334293	0.289451	0.41622	No
ATP2B2	Q01814	Plasma membrane calcium-transporting ATPase 2	0.167568	0.741999	0.809951	No
ATP2B3	Q16720	Plasma membrane calcium-transporting ATPase 3	-0.521091	0.111816	0.224078	No
ATP2B4	P23634	Plasma membrane calcium-transporting ATPase 4	-0.237085	0.607037	0.702576	No
ATP2C1	P98194	Calcium-transporting ATPase type 2C member 1	0.369243	0.110977	0.223638	No
ATP5A1	P25705	ATP synthase subunit alpha, mitochondrial	0.434626	0.0587877	0.150408	No
ATP5B	P06576	ATP synthase subunit beta, mitochondrial	-0.319597	0.291606	0.418601	No
ATP5C1	P36542	ATP synthase subunit gamma, mitochondrial	0.210777	0.246911	0.373411	No
ATP5D	P30049	ATP synthase subunit delta, mitochondrial	-0.9808	0.00411812	0.0340716	No
ATP5E	P56381	ATP synthase subunit epsilon, mitochondrial;ATP synthase subunit epsilon-like protein, mitochondrial	-1.2229	0.0519299	0.137913	No
ATP5F1	P24539	ATP synthase F(0) complex subunit B1, mitochondrial	0.261613	0.173841	0.295603	No
ATP5H	O75947	ATP synthase subunit d, mitochondrial	-0.39941	0.283158	0.41022	No
ATP5I	P56385	ATP synthase subunit e, mitochondrial	0.295541	0.463812	0.577017	No
ATP5J	P18859	ATP synthase-coupling factor 6, mitochondrial	-1.59911	0.131455	0.249996	No
ATP5J2	P56134	ATP synthase subunit f, mitochondrial	-0.0700582	0.837453	0.882361	No
ATP5L	O75964	ATP synthase subunit g, mitochondrial	0.363584	0.126078	0.243479	No
ATP5O	P48047	ATP synthase subunit O, mitochondrial	-1.22262	0.00764591	0.0452458	No
ATP5S	Q99766	ATP synthase subunit s, mitochondrial	-0.556188	0.0904377	0.195573	No
ATP6AP1	Q15904	V-type proton ATPase subunit S1	0.212707	0.476237	0.588567	No
ATP6AP2	O75787	Renin receptor	-0.873404	0.535329	0.641732	No
ATP6V0A1	Q93050	V-type proton ATPase 116 kDa subunit a isoform 1	0.481249	0.0432114	0.123077	No
ATP6V0C	P27449	V-type proton ATPase 16 kDa proteolipid subunit	0.14054	0.816639	0.868434	No
ATP6V0D1	P61421	V-type proton ATPase subunit d 1	-0.0766494	0.723102	0.793803	No
ATP6V0D2	Q8N8Y2	V-type proton ATPase subunit d 2	0.200883	0.252807	0.379646	No
ATP6V1A	P38606	V-type proton ATPase catalytic subunit A	-0.775305	0.0123961	0.0599543	No
ATP6V1C1	P21283	V-type proton ATPase subunit C 1	-0.630787	0.0648337	0.158461	No
ATP6V1D	Q9Y5K8	V-type proton ATPase subunit D	-0.924343	0.0147885	0.0645711	No
ATP6V1E1	P36543	V-type proton ATPase subunit E 1	-1.35128	0.00113283	0.0150745	No
ATP6V1F	Q16864	V-type proton ATPase subunit F	-0.319409	0.443448	0.559875	No
ATP6V1G2	O95670	V-type proton ATPase subunit G 2	-3.80569	0.0674261	0.161964	No
ATP6V1H	Q9UI12	V-type proton ATPase subunit H	-0.744831	0.0169084	0.0693714	No
ATP8A1	Q9Y2Q0	Phospholipid-transporting ATPase IA	-0.636499	0.24851	0.374701	No
ATP8A2	Q9NTI2	Phospholipid-transporting ATPase IB	1.34436	0.154073	0.27443	No
ATP9A	O75110	Probable phospholipid-transporting ATPase IIA	-0.716572	0.0472538	0.129883	No
ATPAF1	Q5TC12	ATP synthase mitochondrial F1 complex assembly factor 1	-0.404345	0.353258	0.480241	No
ATPIF1	Q9UII2	ATPase inhibitor, mitochondrial	-1.33825	0.0325172	0.103903	No
ATXN10	Q9UBB4	Ataxin-10	-0.622358	0.172865	0.29475	No
ATXN2L	Q8WWM7	Ataxin-2-like protein	0.0687846	0.851264	0.89317	No
AUH	Q13825	Methylglutaconyl-CoA hydratase, mitochondrial	-2.33218	0.11039	0.222817	No
AVL9	Q8NBF6	Late secretory pathway protein AVL9 homolog	-1.60401	0.347899	0.475008	No
BAG5	Q9UL15	BAG family molecular chaperone regulator 5	-1.15804	0.400328	0.520861	No
BAG6	P46379	Large proline-rich protein BAG6	0.59039	0.0138204	0.062994	No
BAI3	O60242	Brain-specific angiogenesis inhibitor 3	-0.407464	0.730886	0.800595	No
BAIAP2	Q9UQB8	Brain-specific angiogenesis inhibitor 1-associated protein 2	0.461558	0.243903	0.370616	No
BANF1	O75531	Barrier-to-autointegration factor;Barrier-to-autointegration factor, N-terminally processed	-0.509156	0.309089	0.436473	No
BCAN	Q96GW7	Brevican core protein	-0.097651	0.827503	0.875545	No
BCAP31	P51572	B-cell receptor-associated protein 31	-0.0830058	0.867752	0.906687	No
BCAS1	O75363	Breast carcinoma-amplified sequence 1	-1.92291	0.0215335	0.0799953	No
BCAS3	Q9H6U6	Breast carcinoma-amplified sequence 3	0.280944	0.285895	0.41205	No
BCL2L13	Q9BXK5	Bcl-2-like protein 13	-0.750587	0.104884	0.215288	No
BCLAF1	Q9NYF8	Bcl-2-associated transcription factor 1	3.41273	0.0131	0.0618134	No
BCR	P11274	Breakpoint cluster region protein	0.46443	0.129487	0.248191	No
BDH1	Q02338	D-beta-hydroxybutyrate dehydrogenase, mitochondrial	-0.657598	0.0365515	0.11197	No
BDH2	Q9BUT1	3-hydroxybutyrate dehydrogenase type 2	-0.590126	0.0690349	0.163663	No
BIN1	O00499	Myc box-dependent-interacting protein 1	-1.01655	0.0337293	0.105904	No
BLVRA	P53004	Biliverdin reductase A	-2.52355	0.0799788	0.180887	No
BLVRB	P30043	Flavin reductase (NADPH)	0.808539	0.0394562	0.116744	No
BPHL	Q86WA6	Valacyclovir hydrolase	-2.40779	0.0208649	0.0782045	No
BPNT1	O95861	3(2),5-bisphosphate nucleotidase 1	-2.13148	0.165583	0.287748	No
BRAF	P15056	Serine/threonine-protein kinase B-raf	0.0483067	0.868505	0.907097	No
BRINP1	O60477	BMP/retinoic acid-inducible neural-specific protein 1	1.17801	0.159385	0.280709	No
BRK1	Q8WUW1	Protein BRICK1	0.0984085	0.719819	0.791115	No
BRSK1	Q8TDC3	Serine/threonine-protein kinase BRSK1	0.217131	0.429591	0.547604	No
BRSK2	Q8IWQ3	Serine/threonine-protein kinase BRSK2	0.499305	0.0149251	0.0650549	No
BSG	P35613	Basigin	-0.788537	0.207962	0.332924	No
BSN	Q9UPA5	Protein bassoon	0.240301	0.35035	0.477318	No
BZW1	Q7L1Q6	Basic leucine zipper and W2 domain-containing protein 1	-0.0900385	0.663944	0.751494	No
BZW2	Q9Y6E2	Basic leucine zipper and W2 domain-containing protein 2	-2.64338	0.0120947	0.0591791	No
C12orf57	Q99622	Protein C10	3.97518	0.0140695	0.0631054	No
C14orf166	Q9Y224	UPF0568 protein C14orf166	-2.38437	0.0574372	0.148007	No
C19orf52	Q9BSF4	Uncharacterized protein C19orf52	1.48584	0.19891	0.32378	No
C1orf198	Q9H425	Uncharacterized protein C1orf198	-2.66969	0.065752	0.160084	No
C1orf95	Q69YW2	Protein stum homolog	-0.990033	0.523756	0.630261	No
C1QBP	Q07021	Complement component 1 Q subcomponent-binding protein, mitochondrial	-1.08347	0.0543605	0.142413	No
C2CD2L	O14523	C2 domain-containing protein 2-like	0.0931828	0.674772	0.75795	No
C2CD4C	Q8TF44	C2 calcium-dependent domain-containing protein 4C	-0.410376	0.807427	0.863384	No
C2CD5	Q86YS7	C2 domain-containing protein 5	-0.238025	0.279009	0.405948	No
C2orf47	Q8WWC4	Uncharacterized protein C2orf47, mitochondrial	-0.587448	0.0245277	0.0866394	No
C3	P01024	Complement C3;Complement C3 beta chain;C3-beta-c;Complement C3 alpha chain;C3a anaphylatoxin;Acylation stimulating protein;Complement C3b alpha chain;Complement C3c alpha chain fragment 1;Complement C3dg fragment;Complement C3g fragment;Complement C3d fragment;Complement C3f fragment;Complement C3c alpha chain fragment 2	0.858292	0.285335	0.41205	No
C9orf172	C9J069	Uncharacterized protein C9orf172	1.63307	0.166635	0.288627	No
C9orf64	Q5T6V5	UPF0553 protein C9orf64	-2.73542	0.0529404	0.139712	No
CA4	P22748	Carbonic anhydrase 4	-0.271898	0.658334	0.746825	No
CAB39	Q9Y376	Calcium-binding protein 39	-1.12189	0.000399531	0.00770764	No
CAB39L	Q9H9S4	Calcium-binding protein 39-like	-0.75598	0.00908106	0.0507257	No
CACNA2D1	P54289	Voltage-dependent calcium channel subunit alpha-2/delta-1;Voltage-dependent calcium channel subunit alpha-2-1;Voltage-dependent calcium channel subunit delta-1	0.200829	0.567599	0.667404	No
CACNA2D2	Q9NY47	Voltage-dependent calcium channel subunit alpha-2/delta-2;Voltage-dependent calcium channel subunit alpha-2-2;Voltage-dependent calcium channel subunit delta-2	-1.38554	0.105625	0.215974	No
CACNA2D3	Q8IZS8	Voltage-dependent calcium channel subunit alpha-2/delta-3;Voltage-dependent calcium channel subunit alpha-2-3;Voltage-dependent calcium channel subunit delta-3	0.0836277	0.670336	0.754991	No
CACNB1	Q02641	Voltage-dependent L-type calcium channel subunit beta-1;Voltage-dependent L-type calcium channel subunit beta-2	-0.816017	0.447343	0.562815	No
CACNB3	P54284	Voltage-dependent L-type calcium channel subunit beta-3	-0.762799	0.554666	0.657701	No
CACNB4	O00305	Voltage-dependent L-type calcium channel subunit beta-4	-2.63801	0.0437218	0.123551	No
CACNG8	Q8WXS5	Voltage-dependent calcium channel gamma-8 subunit	-2.74626	0.043606	0.123551	No
CACYBP	Q9HB71	Calcyclin-binding protein	-0.617804	0.277089	0.404223	No
CAD	P27708	CAD protein;Glutamine-dependent carbamoyl-phosphate synthase;Aspartate carbamoyltransferase;Dihydroorotase	1.54008	0.0376795	0.114036	No
CADM1	Q9BY67	Cell adhesion molecule 1	-0.473443	0.134716	0.253032	No
CADM2	Q8N3J6	Cell adhesion molecule 2	0.294778	0.169523	0.291432	No
CADM3	Q8N126	Cell adhesion molecule 3	-0.611767	0.0395799	0.116972	No
CADM4	Q8NFZ8	Cell adhesion molecule 4	-0.820568	0.00437783	0.0346882	No
CADPS	Q9ULU8	Calcium-dependent secretion activator 1	-0.160971	0.576528	0.67566	No
CADPS2	Q86UW7	Calcium-dependent secretion activator 2	-0.219918	0.274066	0.401209	No
CALB1	P05937	Calbindin	-1.62079	0.0868249	0.190711	No
CALCOCO1	Q9P1Z2	Calcium-binding and coiled-coil domain-containing protein 1	0.816222	0.00771375	0.0454335	No
CALD1	Q05682	Caldesmon	-2.48631	0.0691425	0.163663	No
CALR	P27797	Calreticulin	0.0982504	0.794578	0.852181	No
CALU	O43852	Calumenin	0.576807	0.0763358	0.175528	No
CAMK1D	Q8IU85	Calcium/calmodulin-dependent protein kinase type 1D	0.10115	0.638848	0.728991	No
CAMK2A	Q9UQM7	Calcium/calmodulin-dependent protein kinase type II subunit alpha	0.531071	0.118348	0.233814	No
CAMK2B	Q13554	Calcium/calmodulin-dependent protein kinase type II subunit beta	0.600547	0.0626147	0.155189	No
CAMK2D	Q13557	Calcium/calmodulin-dependent protein kinase type II subunit delta	-0.134854	0.688014	0.766041	No
CAMK2G	Q13555	Calcium/calmodulin-dependent protein kinase type II subunit gamma	-0.360953	0.26462	0.391481	No
CAMK4	Q16566	Calcium/calmodulin-dependent protein kinase type IV	-0.326366	0.439196	0.556462	No
CAMKK1	Q8N5S9	Calcium/calmodulin-dependent protein kinase kinase 1	0.822761	0.0136637	0.062994	No
CAMKK2	Q96RR4	Calcium/calmodulin-dependent protein kinase kinase 2	0.172393	0.562979	0.664426	No
CAMKV	Q8NCB2	CaM kinase-like vesicle-associated protein	0.233011	0.573284	0.673114	No
CAMLG	P49069	Calcium signal-modulating cyclophilin ligand	0.765202	0.00149253	0.0178749	No
CAMSAP1	Q5T5Y3	Calmodulin-regulated spectrin-associated protein 1	0.934617	0.203958	0.328816	No
CAMSAP2	Q08AD1	Calmodulin-regulated spectrin-associated protein 2	-0.566934	0.24124	0.368602	No
CAMSAP3	Q9P1Y5	Calmodulin-regulated spectrin-associated protein 3	1.25061	0.000621084	0.0102077	No
CAND1	Q86VP6	Cullin-associated NEDD8-dissociated protein 1	-0.396123	0.15169	0.272981	No
CANX	P27824	Calnexin	-0.482418	0.149676	0.271011	No
CAP1	Q01518	Adenylyl cyclase-associated protein 1	-0.343887	0.252846	0.379646	No
CAP2	P40123	Adenylyl cyclase-associated protein 2	0.63508	0.0314979	0.101953	No
CAPG	P40121	Macrophage-capping protein	-2.38869	0.0430295	0.122959	No
CAPN1	P07384	Calpain-1 catalytic subunit	-1.21503	0.00371203	0.0320959	No
CAPN2	P17655	Calpain-2 catalytic subunit	-0.782471	0.0156818	0.0669605	No
CAPNS1	P04632	Calpain small subunit 1	-0.994857	0.0138786	0.062994	No
CAPRIN1	Q14444	Caprin-1	-0.203259	0.265889	0.392897	No
CAPZA2	P47755	F-actin-capping protein subunit alpha-2	-1.25454	0.0192298	0.0741764	No
CARS	P49589	Cysteine--tRNA ligase, cytoplasmic	-1.07721	0.0577632	0.148695	No
CASK	O14936	Peripheral plasma membrane protein CASK	-0.110246	0.717149	0.788644	No
CASKIN1	Q8WXD9	Caskin-1	0.148254	0.658931	0.747165	No
CAT	P04040	Catalase	-0.291982	0.459861	0.57431	No
CBR1	P16152	Carbonyl reductase [NADPH] 1	0.675905	0.202197	0.326441	No
CBR3	O75828	Carbonyl reductase [NADPH] 3	-3.47307	0.143811	0.263043	No
CBS	P0DN79	Cystathionine beta-synthase	-2.26342	0.0951402	0.201342	No
CBX3	Q13185	Chromobox protein homolog 3	3.70797	0.0280317	0.0938746	No
CC2D1A	Q6P1N0	Coiled-coil and C2 domain-containing protein 1A	1.2382	0.0102288	0.0538468	No
CCAR2	Q8N163	Cell cycle and apoptosis regulator protein 2	0.500958	0.0156356	0.0668838	No
CCBL2	Q6YP21	Kynurenine--oxoglutarate transaminase 3	-0.267465	0.47485	0.587208	No
CCDC127	Q96BQ5	Coiled-coil domain-containing protein 127	0.203282	0.321986	0.450624	No
CCDC132	Q96JG6	Coiled-coil domain-containing protein 132	-0.741419	0.0740402	0.172434	No
CCDC22	O60826	Coiled-coil domain-containing protein 22	0.164083	0.565192	0.6661	No
CCDC43	Q96MW1	Coiled-coil domain-containing protein 43	1.94327	0.0427911	0.122574	No
CCDC47	Q96A33	Coiled-coil domain-containing protein 47	0.0264083	0.943362	0.962107	No
CCDC53	Q9Y3C0	WASH complex subunit CCDC53	0.119642	0.556104	0.658224	No
CCDC6	Q16204	Coiled-coil domain-containing protein 6	-0.0429034	0.884156	0.91911	No
CCDC88A	Q3V6T2	Girdin	0.567362	0.0258109	0.0885936	No
CCDC90B	Q9GZT6	Coiled-coil domain-containing protein 90B, mitochondrial	0.890737	0.0119146	0.0586493	No
CCDC93	Q567U6	Coiled-coil domain-containing protein 93	-1.88903	0.165751	0.287748	No
CCT2	P78371	T-complex protein 1 subunit beta	-0.412015	0.0913483	0.196832	No
CCT3	P49368	T-complex protein 1 subunit gamma	-1.19591	0.000762613	0.0117576	No
CCT5	P48643	T-complex protein 1 subunit epsilon	-1.22801	0.000550878	0.00948945	No
CCT6A	P40227	T-complex protein 1 subunit zeta	-0.271981	0.253464	0.38012	No
CCT7	Q99832	T-complex protein 1 subunit eta	-0.752257	0.0135442	0.0629279	No
CD47	Q08722	Leukocyte surface antigen CD47	0.0459559	0.898516	0.929052	No
CD81	P60033	CD81 antigen	-2.37759	0.067404	0.161964	No
CD9	P21926	CD9 antigen	-3.71982	0.0154495	0.0664195	No
CD99L2	Q8TCZ2	CD99 antigen-like protein 2	-4.141	0.0205251	0.0773924	No
CDC42	P60953	Cell division control protein 42 homolog	-1.38299	0.00557361	0.0387446	No
CDC42BPA	Q5VT25	Serine/threonine-protein kinase MRCK alpha	-1.31229	0.323389	0.451654	No
CDC42BPB	Q9Y5S2	Serine/threonine-protein kinase MRCK beta	0.16859	0.581218	0.679573	No
CDC42EP1	Q00587	Cdc42 effector protein 1	-3.35551	0.0393068	0.116654	No
CDC42EP4	Q9H3Q1	Cdc42 effector protein 4	-0.32446	0.668166	0.753222	No
CDH10	Q9Y6N8	Cadherin-10	0.138177	0.708863	0.782956	No
CDH13	P55290	Cadherin-13	-0.0439347	0.855626	0.896624	No
CDH2	P19022	Cadherin-2	-0.368838	0.134909	0.253174	No
CDK18	Q07002	Cyclin-dependent kinase 18	-0.165249	0.624223	0.716531	No
CDK5	Q00535	Cyclin-dependent-like kinase 5	0.0464059	0.879369	0.916161	No
CDK5RAP3	Q96JB5	CDK5 regulatory subunit-associated protein 3	0.892052	0.00604965	0.040251	No
CDKL5	O76039	Cyclin-dependent kinase-like 5	1.5295	0.121443	0.237872	No
CDS2	O95674	Phosphatidate cytidylyltransferase 2	-2.63694	0.0854122	0.188597	No
CELF2	O95319	CUGBP Elav-like family member 2	0.719109	0.0104512	0.054084	No
CELF4	Q9BZC1	CUGBP Elav-like family member 4	1.04048	0.0008615	0.0128969	No
CEND1	Q8N111	Cell cycle exit and neuronal differentiation protein 1	-0.859857	0.071367	0.167746	No
CEP170	Q5SW79	Centrosomal protein of 170 kDa	1.37024	3.33089e-05	0.00111696	No
CEP170B	Q9Y4F5	Centrosomal protein of 170 kDa protein B	0.777059	0.0425828	0.122309	No
CFL1	P23528	Cofilin-1	-1.48196	0.000603091	0.0101109	No
CHCHD3	Q9NX63	MICOS complex subunit MIC19	0.975553	0.00532387	0.0382822	No
CHCHD6	Q9BRQ6	MICOS complex subunit MIC25	0.513141	0.156159	0.277359	No
CHDH	Q8NE62	Choline dehydrogenase, mitochondrial	-2.89516	0.0166198	0.0689647	No
CHL1	O00533	Neural cell adhesion molecule L1-like protein;Processed neural cell adhesion molecule L1-like protein	-0.62428	0.0617103	0.153513	No
CHMP1A	Q9HD42	Charged multivesicular body protein 1a	-0.0334187	0.930039	0.953194	No
CHMP2A	O43633	Charged multivesicular body protein 2a	-0.16021	0.684499	0.763821	No
CHMP2B	Q9UQN3	Charged multivesicular body protein 2b	-1.55957	0.240771	0.368108	No
CHMP4B	Q9H444	Charged multivesicular body protein 4b	-0.668223	0.131866	0.249996	No
CHMP5	Q9NZZ3	Charged multivesicular body protein 5	0.557123	0.10786	0.219649	No
CHMP6	Q96FZ7	Charged multivesicular body protein 6	0.176539	0.408388	0.528341	No
CHN1	P15882	N-chimaerin	-0.0145989	0.953358	0.968765	No
CHP1	Q99653	Calcineurin B homologous protein 1	-1.19066	0.00253471	0.0254319	No
CIAPIN1	Q6FI81	Anamorsin	-2.20166	0.088724	0.193531	No
CIRBP	Q14011	Cold-inducible RNA-binding protein	0.00752753	0.99108	0.993054	No
CISD1	Q9NZ45	CDGSH iron-sulfur domain-containing protein 1	0.105849	0.793463	0.851348	No
CIT	O14578	Citron Rho-interacting kinase	0.656831	0.0556657	0.144478	No
CKAP4	Q07065	Cytoskeleton-associated protein 4	0.879983	0.128688	0.247819	No
CKAP5	Q14008	Cytoskeleton-associated protein 5	0.0397082	0.882203	0.918353	No
CKB	P12277	Creatine kinase B-type	0.925022	0.00350182	0.0313419	No
CKMT1A	P12532	Creatine kinase U-type, mitochondrial	-1.02479	0.0160926	0.0679073	No
CLASP1	Q7Z460	CLIP-associating protein 1	0.0150035	0.957618	0.971525	No
CLASP2	O75122	CLIP-associating protein 2	0.0652922	0.774103	0.835207	No
CLCN6	P51797	Chloride transport protein 6	1.01138	0.309609	0.436962	No
CLIC1	O00299	Chloride intracellular channel protein 1	-0.426439	0.742933	0.810618	No
CLIC4	Q9Y696	Chloride intracellular channel protein 4	-0.611102	0.326824	0.455129	No
CLINT1	Q14677	Clathrin interactor 1	0.140533	0.602634	0.699143	No
CLIP1	P30622	CAP-Gly domain-containing linker protein 1	-0.622699	0.103346	0.213055	No
CLIP2	Q9UDT6	CAP-Gly domain-containing linker protein 2	-0.43461	0.157679	0.278762	No
CLPB	Q9H078	Caseinolytic peptidase B protein homolog	-3.62638	0.019921	0.0756817	No
CLPTM1	O96005	Cleft lip and palate transmembrane protein 1	-1.37236	0.350756	0.477613	No
CLSTN1	O94985	Calsyntenin-1;Soluble Alc-alpha;CTF1-alpha	-2.86176	0.061309	0.153378	No
CLTA	P09496	Clathrin light chain A	-0.34689	0.183533	0.305888	No
CLTB	P09497	Clathrin light chain B	-1.22741	0.0273809	0.0927877	No
CLTC	Q00610	Clathrin heavy chain 1	0.215053	0.238162	0.36523	No
CLU	P10909	Clusterin;Clusterin beta chain;Clusterin alpha chain	0.37446	0.383448	0.504907	No
CMAS	Q8NFW8	N-acylneuraminate cytidylyltransferase	-0.693589	0.0350882	0.109352	No
CMPK1	P30085	UMP-CMP kinase	0.29666	0.114279	0.227743	No
CNDP2	Q96KP4	Cytosolic non-specific dipeptidase	-0.519777	0.29619	0.423805	No
CNKSR2	Q8WXI2	Connector enhancer of kinase suppressor of ras 2	0.568586	0.130416	0.249048	No
CNN3	Q15417	Calponin-3	-1.31537	0.32249	0.450841	No
CNOT1	A5YKK6	CCR4-NOT transcription complex subunit 1	0.0453178	0.856308	0.896742	No
CNP	P09543	2,3-cyclic-nucleotide 3-phosphodiesterase	-1.01909	0.0278012	0.0934818	No
CNPY2	Q9Y2B0	Protein canopy homolog 2	2.27059	0.0615319	0.153513	No
CNTN1	Q12860	Contactin-1	0.0653379	0.76903	0.83009	No
CNTN2	Q02246	Contactin-2	-1.33793	0.00865169	0.0491174	No
CNTN4	Q8IWV2	Contactin-4	-0.553012	0.683327	0.763129	No
CNTNAP1	P78357	Contactin-associated protein 1	-0.135017	0.633148	0.724486	No
CNTNAP2	Q9UHC6	Contactin-associated protein-like 2	-0.189855	0.510213	0.617807	No
CNTNAP5	Q8WYK1	Contactin-associated protein-like 5	-2.30881	0.113157	0.225865	No
COA3	Q9Y2R0	Cytochrome c oxidase assembly factor 3 homolog, mitochondrial	0.615931	0.0240694	0.085392	No
COASY	Q13057	Bifunctional coenzyme A synthase;Phosphopantetheine adenylyltransferase;Dephospho-CoA kinase	0.814308	0.0276721	0.0934043	No
COL4A2	P08572	Collagen alpha-2(IV) chain;Canstatin	0.945412	0.0182988	0.0722472	No
COL6A3	P12111	Collagen alpha-3(VI) chain	1.65459	0.212153	0.337773	No
COMMD3	Q9UBI1	COMM domain-containing protein 3	-1.88852	0.1321	0.249996	No
COMT	P21964	Catechol O-methyltransferase	-1.56785	0.276237	0.403448	No
COPA	P53621	Coatomer subunit alpha;Xenin;Proxenin	0.553733	0.0443116	0.12424	No
COPB1	P53618	Coatomer subunit beta	0.151083	0.601938	0.698926	No
COPB2	P35606	Coatomer subunit beta	0.674133	0.00639457	0.0413139	No
COPE	O14579	Coatomer subunit epsilon	-0.130111	0.564941	0.6661	No
COPG1	Q9Y678	Coatomer subunit gamma-1	0.726456	0.011378	0.0569098	No
COPS2	P61201	COP9 signalosome complex subunit 2	-0.128285	0.6811	0.761996	No
COPS3	Q9UNS2	COP9 signalosome complex subunit 3	-0.75456	0.0436866	0.123551	No
COPS4	Q9BT78	COP9 signalosome complex subunit 4	-0.804447	0.0166683	0.0689647	No
COPS5	Q92905	COP9 signalosome complex subunit 5	-3.33151	0.00997222	0.0536646	No
COPS6	Q7L5N1	COP9 signalosome complex subunit 6	-1.3338	0.302232	0.429442	No
COPS7A	Q9UBW8	COP9 signalosome complex subunit 7a	-2.55119	0.0893838	0.193928	No
COPS8	Q99627	COP9 signalosome complex subunit 8	-0.0283881	0.921673	0.94754	No
COPZ1	P61923	Coatomer subunit zeta-1	0.0755984	0.750395	0.815577	No
COQ6	Q9Y2Z9	Ubiquinone biosynthesis monooxygenase COQ6, mitochondrial	-2.57547	0.0488999	0.133387	No
COQ7	Q99807	5-demethoxyubiquinone hydroxylase, mitochondrial	-3.31166	0.0105832	0.0545424	No
COQ9	O75208	Ubiquinone biosynthesis protein COQ9, mitochondrial	-0.455999	0.477547	0.589897	No
CORO1A	P31146	Coronin-1A	0.316579	0.422987	0.543316	No
CORO1B	Q9BR76	Coronin-1B	-0.482253	0.0170644	0.0697504	No
CORO1C	Q9ULV4	Coronin-1C	-0.170111	0.667271	0.753222	No
CORO2B	Q9UQ03	Coronin-2B	0.156081	0.494104	0.605	No
CORO7	P57737	Coronin-7	0.622003	0.0610289	0.153378	No
COX4I1	P13073	Cytochrome c oxidase subunit 4 isoform 1, mitochondrial	0.0696916	0.819252	0.870477	No
COX5A	P20674	Cytochrome c oxidase subunit 5A, mitochondrial	-0.72777	0.150918	0.272289	No
COX5B	P10606	Cytochrome c oxidase subunit 5B, mitochondrial	0.450726	0.257733	0.385145	No
COX6C	P09669	Cytochrome c oxidase subunit 6C	1.15362	0.00444147	0.0346882	No
COX7A1	P24310	Cytochrome c oxidase subunit 7A1, mitochondrial	-1.92656	0.133889	0.251856	No
COX7A2	P14406	Cytochrome c oxidase subunit 7A2, mitochondrial	0.760271	0.0055325	0.0386506	No
COX7A2L	O14548	Cytochrome c oxidase subunit 7A-related protein, mitochondrial	-0.267953	0.279079	0.405948	No
COX7C	P15954	Cytochrome c oxidase subunit 7C, mitochondrial	0.255746	0.497672	0.6073	No
CPE	P16870	Carboxypeptidase E	-2.06895	0.135515	0.253309	No
CPEB4	Q17RY0	Cytoplasmic polyadenylation element-binding protein 4;Cytoplasmic polyadenylation element-binding protein 2;Cytoplasmic polyadenylation element-binding protein 3	-1.08627	0.426367	0.545152	No
CPLX1	O14810	Complexin-1	-1.90048	0.0926952	0.198784	No
CPLX2	Q6PUV4	Complexin-2	-0.0811059	0.858969	0.899004	No
CPNE1	Q99829	Copine-1	-1.49392	0.248915	0.375088	No
CPNE5	Q9HCH3	Copine-5	-0.507742	0.207338	0.332773	No
CPNE6	O95741	Copine-6	0.644961	0.104061	0.213992	No
CPT1A	P50416	Carnitine O-palmitoyltransferase 1, liver isoform	-0.503104	0.197381	0.322556	No
CPT2	P23786	Carnitine O-palmitoyltransferase 2, mitochondrial	-0.309299	0.397662	0.517928	No
CRBN	Q96SW2	Protein cereblon	-3.20725	0.0314462	0.101953	No
CRIP2	P52943	Cysteine-rich protein 2	0.715702	0.058294	0.149601	No
CRK	P46108	Adapter molecule crk	0.854115	0.0256172	0.0881383	No
CRKL	P46109	Crk-like protein	1.27114	0.00978833	0.0531698	No
CRMP1	Q14194	Dihydropyrimidinase-related protein 1	-0.296061	0.40493	0.525761	No
CRTAC1	Q9NQ79	Cartilage acidic protein 1	4.49745	0.0105047	0.0542491	No
CRYAB	P02511	Alpha-crystallin B chain	-1.03145	0.287819	0.414243	No
CRYL1	Q9Y2S2	Lambda-crystallin homolog	-3.55369	0.0223423	0.0823541	No
CS	O75390	Citrate synthase, mitochondrial	-0.344375	0.177035	0.298755	No
CSDE1	O75534	Cold shock domain-containing protein E1	0.0268567	0.896989	0.927983	No
CSE1L	P55060	Exportin-2	0.0541172	0.82288	0.872163	No
CSK	P41240	Tyrosine-protein kinase CSK	1.11741	0.000506391	0.00899488	No
CSNK1E	P49674	Casein kinase I isoform epsilon;Casein kinase I isoform delta	0.67891	0.0126849	0.0606136	No
CSNK2A1	P68400	Casein kinase II subunit alpha;Casein kinase II subunit alpha 3	-0.431992	0.147484	0.268111	No
CSNK2A2	P19784	Casein kinase II subunit alpha	0.10173	0.690548	0.767445	No
CSNK2B	P67870	Casein kinase II subunit beta	-3.40196	0.0373399	0.113502	No
CTNNA2	P26232	Catenin alpha-2	-0.164294	0.680607	0.761783	No
CTNNB1	P35222	Catenin beta-1	0.334841	0.27367	0.401095	No
CTNND1	O60716	Catenin delta-1	0.134035	0.716857	0.788644	No
CTNND2	Q9UQB3	Catenin delta-2	0.0169337	0.937299	0.958254	No
CTPS1	P17812	CTP synthase 1	-0.219036	0.842236	0.885667	No
CTSD	P07339	Cathepsin D;Cathepsin D light chain;Cathepsin D heavy chain	-1.12342	0.00398374	0.0336283	No
CTTN	Q14247	Src substrate cortactin	-0.523595	0.0356963	0.11029	No
CUL1	Q13616	Cullin-1	-0.422448	0.0740371	0.172434	No
CUL2	Q13617	Cullin-2	0.120344	0.641925	0.731841	No
CUL3	Q13618	Cullin-3	0.101248	0.633169	0.724486	No
CUL4B	Q13620	Cullin-4B	-2.91531	0.0330518	0.10468	No
CUL5	Q93034	Cullin-5	-0.142664	0.613166	0.70825	No
CXADR	P78310	Coxsackievirus and adenovirus receptor	-0.543473	0.698527	0.774601	No
CYB5B	O43169	Cytochrome b5 type B	-0.433174	0.23448	0.36179	No
CYB5R1	Q9UHQ9	NADH-cytochrome b5 reductase 1	-0.559737	0.150003	0.271018	No
CYB5R3	P00387	NADH-cytochrome b5 reductase 3;NADH-cytochrome b5 reductase 3 membrane-bound form;NADH-cytochrome b5 reductase 3 soluble form	-0.254731	0.352876	0.479981	No
CYC1	P08574	Cytochrome c1, heme protein, mitochondrial	-0.336574	0.128803	0.247849	No
CYFIP1	Q7L576	Cytoplasmic FMR1-interacting protein 1	0.531745	0.0661609	0.160655	No
CYFIP2	Q96F07	Cytoplasmic FMR1-interacting protein 2	-0.692481	0.131596	0.249996	No
CYLD	Q9NQC7	Ubiquitin carboxyl-terminal hydrolase CYLD	0.951575	0.000787731	0.0118631	No
CYP46A1	Q9Y6A2	Cholesterol 24-hydroxylase	-1.28478	0.295188	0.423259	No
DAAM1	Q9Y4D1	Disheveled-associated activator of morphogenesis 1	-1.20836	0.396438	0.516793	No
DAB2IP	Q5VWQ8	Disabled homolog 2-interacting protein	0.912673	0.00363586	0.031965	No
DAK	Q3LXA3	Bifunctional ATP-dependent dihydroxyacetone kinase/FAD-AMP lyase (cyclizing);ATP-dependent dihydroxyacetone kinase;FAD-AMP lyase (cyclizing)	-1.40476	0.00439827	0.0346882	No
DARS	P14868	Aspartate--tRNA ligase, cytoplasmic	-0.582384	0.0752453	0.173936	No
DBN1	Q16643	Drebrin	-0.809498	0.034679	0.108345	No
DBNL	Q9UJU6	Drebrin-like protein	-0.0159769	0.964763	0.975232	No
DBT	P11182	Lipoamide acyltransferase component of branched-chain alpha-keto acid dehydrogenase complex, mitochondrial	-0.424963	0.151682	0.272981	No
DCLK1	O15075	Serine/threonine-protein kinase DCLK1	0.757841	0.0135978	0.0629279	No
DCLK2	Q8N568	Serine/threonine-protein kinase DCLK2	0.845671	0.00305803	0.028691	No
DCTN1	Q14203	Dynactin subunit 1	-0.433936	0.149832	0.271018	No
DCTN2	Q13561	Dynactin subunit 2	-1.01307	0.0335686	0.105531	No
DCTN3	O75935	Dynactin subunit 3	-1.11499	0.0328597	0.104346	No
DCTN4	Q9UJW0	Dynactin subunit 4	-0.986641	0.0256179	0.0881383	No
DCUN1D1	Q96GG9	DCN1-like protein 1	-2.77733	0.0379611	0.114475	No
DDAH1	O94760	N(G),N(G)-dimethylarginine dimethylaminohydrolase 1	-0.943505	0.00293488	0.0279592	No
DDAH2	O95865	N(G),N(G)-dimethylarginine dimethylaminohydrolase 2	-0.480078	0.193095	0.317772	No
DDI2	Q5TDH0	Protein DDI1 homolog 2	-2.18852	0.0547297	0.143033	No
DDOST	P39656	Dolichyl-diphosphooligosaccharide--protein glycosyltransferase 48 kDa subunit	0.334865	0.347001	0.475008	No
DDX1	Q92499	ATP-dependent RNA helicase DDX1	-0.239927	0.347769	0.475008	No
DDX17	Q92841	Probable ATP-dependent RNA helicase DDX17	1.18291	0.00445526	0.0346882	No
DDX19A	Q9NUU7	ATP-dependent RNA helicase DDX19A;ATP-dependent RNA helicase DDX19B	0.479334	0.055424	0.143999	No
DDX39B	Q13838	Spliceosome RNA helicase DDX39B	-0.198837	0.41799	0.538547	No
DDX3X	O00571	ATP-dependent RNA helicase DDX3X	0.68641	0.0775854	0.177392	No
DDX46	Q7L014	Probable ATP-dependent RNA helicase DDX46	2.78028	0.015275	0.0657819	No
DDX5	P17844	Probable ATP-dependent RNA helicase DDX5	0.563282	0.0892205	0.193928	No
DDX6	P26196	Probable ATP-dependent RNA helicase DDX6	-0.632659	0.066718	0.160976	No
DES	P17661	Desmin	-2.52831	0.101667	0.211492	No
DGKA	P23743	Diacylglycerol kinase alpha	2.51259	0.0724467	0.169807	No
DGKB	Q9Y6T7	Diacylglycerol kinase beta	0.102095	0.810821	0.865174	No
DHRS7	Q9Y394	Dehydrogenase/reductase SDR family member 7	-0.0812068	0.750042	0.815544	No
DHX15	O43143	Pre-mRNA-splicing factor ATP-dependent RNA helicase DHX15	-1.20739	0.358323	0.484491	No
DHX30	Q7L2E3	Putative ATP-dependent RNA helicase DHX30	0.520302	0.0840835	0.186586	No
DHX9	Q08211	ATP-dependent RNA helicase A	0.463718	0.0512907	0.137376	No
DIABLO	Q9NR28	Diablo homolog, mitochondrial	-3.16195	0.0371653	0.113161	No
DIP2B	Q9P265	Disco-interacting protein 2 homolog B	-0.212439	0.513019	0.620309	No
DIP2C	Q9Y2E4	Disco-interacting protein 2 homolog C	-2.06719	0.156649	0.277952	No
DIRAS1	O95057	GTP-binding protein Di-Ras1	-0.0254186	0.9115	0.939902	No
DIRAS2	Q96HU8	GTP-binding protein Di-Ras2	0.657991	0.12302	0.239233	No
DKK3	Q9UBP4	Dickkopf-related protein 3	-1.87434	0.0807543	0.181824	No
DLAT	P10515	Dihydrolipoyllysine-residue acetyltransferase component of pyruvate dehydrogenase complex, mitochondrial	-0.60178	0.0926071	0.198784	No
DLD	P09622	Dihydrolipoyl dehydrogenase, mitochondrial	-1.19522	0.0103208	0.0539642	No
DLG1	Q12959	Disks large homolog 1	-0.0852859	0.77691	0.837159	No
DLG2	Q15700	Disks large homolog 2	0.211521	0.597352	0.694564	No
DLG3	Q92796	Disks large homolog 3	0.49044	0.0606268	0.153089	No
DLG4	P78352	Disks large homolog 4	0.125639	0.710731	0.784121	No
DLGAP1	O14490	Disks large-associated protein 1	0.382632	0.279808	0.406303	No
DLGAP2	Q9P1A6	Disks large-associated protein 2	-1.57415	0.270804	0.398054	No
DLGAP3	O95886	Disks large-associated protein 3	0.724704	0.0875489	0.191799	No
DLGAP4	Q9Y2H0	Disks large-associated protein 4	-1.30661	0.345192	0.473886	No
DMD	P11532	Dystrophin	-1.68276	0.169887	0.291512	No
DMTN	Q08495	Dematin	0.410286	0.241422	0.368656	No
DMWD	Q09019	Dystrophia myotonica WD repeat-containing protein	0.471825	0.206916	0.332395	No
DMXL2	Q8TDJ6	DmX-like protein 2	-0.430694	0.257636	0.385145	No
DNAJA1	P31689	DnaJ homolog subfamily A member 1	0.30571	0.323889	0.452043	No
DNAJA2	O60884	DnaJ homolog subfamily A member 2	-0.52957	0.0278401	0.0934818	No
DNAJA3	Q96EY1	DnaJ homolog subfamily A member 3, mitochondrial	-0.0291724	0.914129	0.941842	No
DNAJA4	Q8WW22	DnaJ homolog subfamily A member 4	-1.53247	0.214892	0.340979	No
DNAJB1	P25685	DnaJ homolog subfamily B member 1	1.24677	0.0034838	0.031292	No
DNAJB11	Q9UBS4	DnaJ homolog subfamily B member 11	0.016179	0.96944	0.977306	No
DNAJB2	P25686	DnaJ homolog subfamily B member 2	0.704559	0.060936	0.153378	No
DNAJB4	Q9UDY4	DnaJ homolog subfamily B member 4	0.248819	0.211452	0.337009	No
DNAJB6	O75190	DnaJ homolog subfamily B member 6;DnaJ homolog subfamily B member 8	0.698026	0.0824093	0.183741	No
DNAJC11	Q9NVH1	DnaJ homolog subfamily C member 11	0.551641	0.0205868	0.0773929	No
DNAJC19	Q96DA6	Mitochondrial import inner membrane translocase subunit TIM14	0.322105	0.429183	0.547604	No
DNAJC5	Q9H3Z4	DnaJ homolog subfamily C member 5	0.0705816	0.865491	0.904701	No
DNAJC6	O75061	Putative tyrosine-protein phosphatase auxilin	-0.364497	0.282629	0.409926	No
DNAJC7	Q99615	DnaJ homolog subfamily C member 7	0.578489	0.0848971	0.187787	No
DNM1	Q05193	Dynamin-1	0.567948	0.0162019	0.0681399	No
DNM1L	O00429	Dynamin-1-like protein	-0.354836	0.461036	0.575233	No
DNM2	P50570	Dynamin-2	0.386443	0.186985	0.310223	No
DNM3	Q9UQ16	Dynamin-3	-0.374409	0.0842973	0.186769	No
DOC2A	Q14183	Double C2-like domain-containing protein alpha	-0.549096	0.637719	0.728697	No
DOCK9	Q9BZ29	Dedicator of cytokinesis protein 9	-3.26268	0.0143916	0.0637232	No
DOS	Q8N350	Protein Dos	0.461628	0.277555	0.404433	No
DPM1	O60762	Dolichol-phosphate mannosyltransferase subunit 1	0.265345	0.341317	0.470105	No
DPP10	Q8N608	Inactive dipeptidyl peptidase 10	0.346157	0.395264	0.516041	No
DPP3	Q9NY33	Dipeptidyl peptidase 3	-1.47998	0.248477	0.374701	No
DPP6	P42658	Dipeptidyl aminopeptidase-like protein 6	0.162168	0.615974	0.70998	No
DPYSL4	O14531	Dihydropyrimidinase-related protein 4	0.121155	0.685016	0.763821	No
DPYSL5	Q9BPU6	Dihydropyrimidinase-related protein 5	-0.594222	0.185237	0.308523	No
DR1	Q01658	Protein Dr1	-3.07205	0.0100281	0.0536646	No
DST	Q03001	Dystonin	0.331246	0.133029	0.250989	No
DSTN	P60981	Destrin	-0.0500737	0.842352	0.885667	No
DTNA	Q9Y4J8	Dystrobrevin alpha	-0.570314	0.0819717	0.18309	No
DUSP3	P51452	Dual specificity protein phosphatase 3	-0.0593141	0.918827	0.945519	No
DYNC1H1	Q14204	Cytoplasmic dynein 1 heavy chain 1	0.213235	0.274666	0.401853	No
DYNC1I1	O14576	Cytoplasmic dynein 1 intermediate chain 1	-0.275304	0.388204	0.509037	No
DYNC1I2	Q13409	Cytoplasmic dynein 1 intermediate chain 2	-0.302533	0.37407	0.496719	No
DYNC1LI1	Q9Y6G9	Cytoplasmic dynein 1 light intermediate chain 1	-0.967914	0.0164495	0.0688359	No
DYNC1LI2	O43237	Cytoplasmic dynein 1 light intermediate chain 2	-0.278817	0.368911	0.492751	No
DYNLRB1	Q9NP97	Dynein light chain roadblock-type 1;Dynein light chain roadblock-type 2	1.38518	0.00179834	0.0201912	No
EARS2	Q5JPH6	Probable glutamate--tRNA ligase, mitochondrial	0.204583	0.431453	0.549142	No
ECH1	Q13011	Delta(3,5)-Delta(2,4)-dienoyl-CoA isomerase, mitochondrial	-3.62956	0.0167023	0.0689647	No
ECI1	P42126	Enoyl-CoA delta isomerase 1, mitochondrial	-0.29371	0.425488	0.544582	No
ECM29	Q5VYK3	Proteasome-associated protein ECM29 homolog	0.567711	0.0616049	0.153513	No
EDF1	O60869	Endothelial differentiation-related factor 1	-3.17482	0.0137299	0.062994	No
EEA1	Q15075	Early endosome antigen 1	-3.83885	0.0359041	0.110545	No
EEF1A1	P68104	Elongation factor 1-alpha 1;Putative elongation factor 1-alpha-like 3	0.93027	0.0189946	0.0737737	No
EEF1A2	Q05639	Elongation factor 1-alpha 2	0.277949	0.364771	0.48954	No
EEF1B2	P24534	Elongation factor 1-beta	0.140092	0.715873	0.787931	No
EEF1D	P29692	Elongation factor 1-delta	-0.558313	0.0416812	0.120909	No
EEF1E1	O43324	Eukaryotic translation elongation factor 1 epsilon-1	-0.247791	0.497332	0.6073	No
EEF1G	P26641	Elongation factor 1-gamma	-0.00257465	0.993579	0.995162	No
EEF2	P13639	Elongation factor 2	-0.400394	0.0919933	0.197746	No
EFHD2	Q96C19	EF-hand domain-containing protein D2	-1.24509	0.000410666	0.00770764	No
EFR3B	Q9Y2G0	Protein EFR3 homolog B	0.397699	0.17619	0.298054	No
EFTUD2	Q15029	116 kDa U5 small nuclear ribonucleoprotein component	0.107011	0.618307	0.712341	No
EHD1	Q9H4M9	EH domain-containing protein 1	0.397256	0.0383269	0.115109	No
EHD3	Q9NZN3	EH domain-containing protein 3	0.207322	0.369714	0.493017	No
EHD4	Q9H223	EH domain-containing protein 4	2.84597	0.0618582	0.153729	No
EIF2A	Q9BY44	Eukaryotic translation initiation factor 2A;Eukaryotic translation initiation factor 2A, N-terminally processed	0.681339	0.00769507	0.0454298	No
EIF2AK2	P19525	Interferon-induced, double-stranded RNA-activated protein kinase	0.20841	0.374579	0.49687	No
EIF2B3	Q9NR50	Translation initiation factor eIF-2B subunit gamma	-2.95135	0.025389	0.0878854	No
EIF2B4	Q9UI10	Translation initiation factor eIF-2B subunit delta	-2.80035	0.0351947	0.109412	No
EIF2S1	P05198	Eukaryotic translation initiation factor 2 subunit 1	-0.926834	0.00179472	0.0201912	No
EIF2S2	P20042	Eukaryotic translation initiation factor 2 subunit 2	-2.48325	0.0940025	0.200274	No
EIF3A	Q14152	Eukaryotic translation initiation factor 3 subunit A	0.239842	0.368407	0.492751	No
EIF3B	P55884	Eukaryotic translation initiation factor 3 subunit B	-0.622437	0.0798664	0.180796	No
EIF3C	Q99613	Eukaryotic translation initiation factor 3 subunit C;Eukaryotic translation initiation factor 3 subunit C-like protein	0.164199	0.434098	0.551561	No
EIF3D	O15371	Eukaryotic translation initiation factor 3 subunit D	-1.20046	0.236136	0.363453	No
EIF3E	P60228	Eukaryotic translation initiation factor 3 subunit E	-2.24908	0.051867	0.137913	No
EIF3F	O00303	Eukaryotic translation initiation factor 3 subunit F	-1.4627	0.254099	0.380845	No
EIF3G	O75821	Eukaryotic translation initiation factor 3 subunit G	0.262714	0.449588	0.56451	No
EIF3H	O15372	Eukaryotic translation initiation factor 3 subunit H	-0.277578	0.261259	0.389026	No
EIF3J	O75822	Eukaryotic translation initiation factor 3 subunit J	-2.55655	0.196063	0.320806	No
EIF3K	Q9UBQ5	Eukaryotic translation initiation factor 3 subunit K	-1.09328	0.379523	0.500787	No
EIF3L	Q9Y262	Eukaryotic translation initiation factor 3 subunit L	0.275247	0.194406	0.319355	No
EIF4A1	P60842	Eukaryotic initiation factor 4A-I	0.862985	0.0229514	0.0834145	No
EIF4A2	Q14240	Eukaryotic initiation factor 4A-II;Eukaryotic initiation factor 4A-II, N-terminally processed	-0.296607	0.370383	0.493575	No
EIF4A3	P38919	Eukaryotic initiation factor 4A-III;Eukaryotic initiation factor 4A-III, N-terminally processed	0.283229	0.493365	0.604427	No
EIF4B	P23588	Eukaryotic translation initiation factor 4B	-0.421659	0.0751103	0.173783	No
EIF4G1	Q04637	Eukaryotic translation initiation factor 4 gamma 1	0.036116	0.924677	0.949597	No
EIF4G2	P78344	Eukaryotic translation initiation factor 4 gamma 2	0.423502	0.262279	0.389854	No
EIF4G3	O43432	Eukaryotic translation initiation factor 4 gamma 3	0.0924404	0.848561	0.89145	No
EIF4H	Q15056	Eukaryotic translation initiation factor 4H	0.849102	0.00103403	0.0144003	No
EIF5	P55010	Eukaryotic translation initiation factor 5	0.732628	0.0325206	0.103903	No
EIF5A	P63241	Eukaryotic translation initiation factor 5A-1;Eukaryotic translation initiation factor 5A-1-like	-3.91394	0.0165977	0.0689647	No
ELAVL1	Q15717	ELAV-like protein 1	0.725304	0.0104329	0.054084	No
ELAVL4	P26378	ELAV-like protein 4	-0.475317	0.667164	0.753222	No
EMC1	Q8N766	ER membrane protein complex subunit 1	0.719989	0.00263531	0.0260937	No
EMC2	Q15006	ER membrane protein complex subunit 2	-0.225005	0.328478	0.456995	No
EMD	P50402	Emerin	0.997745	0.0106641	0.054735	No
ENDOD1	O94919	Endonuclease domain-containing 1 protein	0.0273789	0.906527	0.935925	No
ENO1	P06733	Alpha-enolase	-1.26892	0.0170972	0.0697504	No
ENOPH1	Q9UHY7	Enolase-phosphatase E1	-2.54277	0.109821	0.222384	No
ENPP4	Q9Y6X5	Bis(5-adenosyl)-triphosphatase ENPP4	-0.679308	0.560059	0.661291	No
ENPP6	Q6UWR7	Ectonucleotide pyrophosphatase/phosphodiesterase family member 6	-0.956484	0.180763	0.302676	No
EPB41L1	Q9H4G0	Band 4.1-like protein 1	0.606172	0.00861995	0.0490479	No
EPB41L2	O43491	Band 4.1-like protein 2	-1.04449	0.00933447	0.0514829	No
EPB41L3	Q9Y2J2	Band 4.1-like protein 3;Band 4.1-like protein 3, N-terminally processed	0.066127	0.751881	0.816262	No
EPDR1	Q9UM22	Mammalian ependymin-related protein 1	-1.16482	0.00598527	0.0401412	No
EPHA4	P54764	Ephrin type-A receptor 4	0.163245	0.507562	0.61608	No
EPHB2	P29323	Ephrin type-B receptor 2	-0.751311	0.477927	0.589912	No
EPHX1	P07099	Epoxide hydrolase 1	0.488741	0.131835	0.249996	No
EPM2AIP1	Q7L775	EPM2A-interacting protein 1	0.801594	0.0133896	0.0625927	No
EPN1	Q9Y6I3	Epsin-1	-0.74654	0.105161	0.215374	No
EPN2	O95208	Epsin-2	-3.3875	0.0224178	0.0823541	No
EPRS	P07814	Bifunctional glutamate/proline--tRNA ligase;Glutamate--tRNA ligase;Proline--tRNA ligase	-0.0284036	0.885703	0.919713	No
EPS15	P42566	Epidermal growth factor receptor substrate 15	-1.40698	0.0784083	0.178459	No
EPS15L1	Q9UBC2	Epidermal growth factor receptor substrate 15-like 1	-0.0165336	0.951181	0.967727	No
ERC1	Q8IUD2	ELKS/Rab6-interacting/CAST family member 1	0.556239	0.0387488	0.115428	No
ERC2	O15083	ERC protein 2	0.428346	0.232932	0.359843	No
ERLIN2	O94905	Erlin-2	0.193636	0.314742	0.442221	No
ERO1L	Q96HE7	ERO1-like protein alpha	-3.58728	0.0147445	0.0644913	No
ERP29	P30040	Endoplasmic reticulum resident protein 29	-1.2641	0.00492838	0.0368895	No
ERP44	Q9BS26	Endoplasmic reticulum resident protein 44	0.321217	0.23968	0.366888	No
ESYT1	Q9BSJ8	Extended synaptotagmin-1	-0.131592	0.567482	0.667404	No
ESYT2	A0FGR8	Extended synaptotagmin-2	-0.1736	0.448585	0.563532	No
ETF1	P62495	Eukaryotic peptide chain release factor subunit 1	-0.824538	0.111551	0.223876	No
ETFA	P13804	Electron transfer flavoprotein subunit alpha, mitochondrial	-1.45938	0.000117693	0.00320353	No
ETFB	P38117	Electron transfer flavoprotein subunit beta	-5.24833	0.00989898	0.0534247	No
ETFDH	Q16134	Electron transfer flavoprotein-ubiquinone oxidoreductase, mitochondrial	-0.154976	0.385287	0.506532	No
EVL	Q9UI08	Ena/VASP-like protein	-2.93005	0.0681421	0.162827	No
EXOC1	Q9NV70	Exocyst complex component 1	0.192662	0.301991	0.429343	No
EXOC2	Q96KP1	Exocyst complex component 2	-0.108847	0.692539	0.769318	No
EXOC3	O60645	Exocyst complex component 3	0.368248	0.169998	0.291512	No
EXOC4	Q96A65	Exocyst complex component 4	0.204711	0.469327	0.582605	No
EXOC5	O00471	Exocyst complex component 5	0.326196	0.173953	0.295603	No
EXOC6B	Q9Y2D4	Exocyst complex component 6B	0.199574	0.278845	0.405948	No
EXOC7	Q9UPT5	Exocyst complex component 7	0.406101	0.0480279	0.131151	No
EXOC8	Q8IYI6	Exocyst complex component 8	0.430854	0.0412092	0.120233	No
EXOG	Q9Y2C4	Nuclease EXOG, mitochondrial	0.353781	0.323431	0.451654	No
F8A1	P23610	Factor VIII intron 22 protein	-0.97759	0.405458	0.525903	No
FABP5	Q01469	Fatty acid-binding protein, epidermal	-1.19204	0.0881815	0.192849	No
FABP7	O15540	Fatty acid-binding protein, brain	-0.643939	0.0468253	0.129488	No
FAF1	Q9UNN5	FAS-associated factor 1	-2.46889	0.0441317	0.12424	No
FAF2	Q96CS3	FAS-associated factor 2	0.314676	0.186289	0.309661	No
FAM120A	Q9NZB2	Constitutive coactivator of PPAR-gamma-like protein 1	-0.464386	0.147729	0.268258	No
FAM126B	Q8IXS8	Protein FAM126B	-0.163889	0.669987	0.754936	No
FAM127A	A6ZKI3	Protein FAM127A	-1.38881	0.165899	0.287748	No
FAM129B	Q96TA1	Niban-like protein 1	-3.78324	0.0238892	0.0853429	No
FAM131B	Q86XD5	Protein FAM131B	0.320252	0.263164	0.390113	No
FAM134A	Q8NC44	Protein FAM134A	1.62605	0.231668	0.35811	No
FAM162A	Q96A26	Protein FAM162A	-0.180329	0.266818	0.393807	No
FAM169A	Q9Y6X4	Soluble lamin-associated protein of 75 kDa	-3.47194	0.0450272	0.125826	No
FAM171B	Q6P995	Protein FAM171B	-0.703726	0.132694	0.25064	No
FAM177A1	Q8N128	Protein FAM177A1	-0.33103	0.809398	0.864989	No
FAM213A	Q9BRX8	Redox-regulatory protein FAM213A	-0.466113	0.126144	0.243479	No
FAM213B	Q8TBF2	Prostamide/prostaglandin F synthase	-2.84553	0.00929585	0.0513826	No
FAM49A	Q9H0Q0	Protein FAM49A	-0.13586	0.64753	0.737229	No
FAM49B	Q9NUQ9	Protein FAM49B	-0.819603	0.123419	0.239504	No
FAM65A	Q6ZS17	Protein FAM65A	-2.65428	0.0218419	0.0807829	No
FAM81A	Q8TBF8	Protein FAM81A	0.37969	0.347599	0.475008	No
FARP1	Q9Y4F1	FERM, RhoGEF and pleckstrin domain-containing protein 1	-0.0152007	0.930612	0.953194	No
FARSA	Q9Y285	Phenylalanine--tRNA ligase alpha subunit	0.583684	0.0464875	0.128904	No
FARSB	Q9NSD9	Phenylalanine--tRNA ligase beta subunit	-0.635257	0.0522328	0.138571	No
FASN	P49327	Fatty acid synthase;[Acyl-carrier-protein] S-acetyltransferase;[Acyl-carrier-protein] S-malonyltransferase;3-oxoacyl-[acyl-carrier-protein] synthase;3-oxoacyl-[acyl-carrier-protein] reductase;3-hydroxyacyl-[acyl-carrier-protein] dehydratase;Enoyl-[acyl-carrier-protein] reductase;Oleoyl-[acyl-carrier-protein] hydrolase	-0.819747	0.0111397	0.0561449	No
FBL	P22087	rRNA 2-O-methyltransferase fibrillarin	2.7966	0.0131774	0.0620565	No
FBXL16	Q8N461	F-box/LRR-repeat protein 16	-1.73142	0.173371	0.295412	No
FBXO2	Q9UK22	F-box only protein 2	-1.13995	0.0182074	0.0721127	No
FBXO41	Q8TF61	F-box only protein 41	0.597924	0.0838069	0.186361	No
FDPS	P14324	Farnesyl pyrophosphate synthase	-0.861041	0.0143109	0.0634776	No
FDXR	P22570	NADPH:adrenodoxin oxidoreductase, mitochondrial	-0.322096	0.523059	0.630026	No
FERMT2	Q96AC1	Fermitin family homolog 2	-0.409403	0.447815	0.562846	No
FGA	P02671	Fibrinogen alpha chain;Fibrinopeptide A;Fibrinogen alpha chain	1.70158	0.091008	0.196637	No
FGG	P02679	Fibrinogen gamma chain	2.52285	0.141284	0.259555	No
FH	P07954	Fumarate hydratase, mitochondrial	-1.19102	0.00157891	0.0187805	No
FIBP	O43427	Acidic fibroblast growth factor intracellular-binding protein	-0.501706	0.108314	0.22004	No
FIS1	Q9Y3D6	Mitochondrial fission 1 protein	0.44176	0.151439	0.272981	No
FKBP15	Q5T1M5	FK506-binding protein 15	0.610853	0.0223972	0.0823541	No
FKBP2	P26885	Peptidyl-prolyl cis-trans isomerase FKBP2	2.56915	0.153214	0.273479	No
FKBP4	Q02790	Peptidyl-prolyl cis-trans isomerase FKBP4;Peptidyl-prolyl cis-trans isomerase FKBP4, N-terminally processed	-0.48099	0.505693	0.614405	No
FKBP8	Q14318	Peptidyl-prolyl cis-trans isomerase FKBP8	-0.11938	0.726569	0.796912	No
FLII	Q13045	Protein flightless-1 homolog	-0.186306	0.870354	0.908229	No
FLNA	P21333	Filamin-A	0.44861	0.324389	0.452489	No
FLNB	O75369	Filamin-B	-2.68153	0.0373934	0.113502	No
FLNC	Q14315	Filamin-C	2.90608	0.0135559	0.0629279	No
FLOT1	O75955	Flotillin-1	0.589036	0.0636335	0.1569	No
FLOT2	Q14254	Flotillin-2	0.492273	0.114714	0.228429	No
FMN2	Q9NZ56	Formin-2	0.869879	0.0121601	0.059384	No
FMNL2	Q96PY5	Formin-like protein 2	-0.565214	0.132745	0.25064	No
FN3K	Q9H479	Fructosamine-3-kinase	-0.173863	0.4553	0.569408	No
FSCN1	Q16658	Fascin	-1.13548	0.0314326	0.101953	No
FSD1	Q9BTV5	Fibronectin type III and SPRY domain-containing protein 1	0.309382	0.328616	0.456995	No
FSD1L	Q9BXM9	FSD1-like protein	1.15787	0.000884921	0.0130916	No
FTH1	P02794	Ferritin heavy chain;Ferritin heavy chain, N-terminally processed	-1.45607	0.00133091	0.0166528	No
FTL	P02792	Ferritin light chain	-0.238492	0.57538	0.675237	No
FUBP3	Q96I24	Far upstream element-binding protein 3	0.790652	0.0387171	0.115428	No
FUNDC2	Q9BWH2	FUN14 domain-containing protein 2	0.0808903	0.769004	0.83009	No
FUS	P35637	RNA-binding protein FUS	4.50142	0.0107219	0.0548083	No
FXN	Q16595	Frataxin, mitochondrial;Frataxin intermediate form;Frataxin(56-210);Frataxin(78-210);Frataxin mature form	-2.2973	0.0823703	0.183741	No
FXR1	P51114	Fragile X mental retardation syndrome-related protein 1	-2.44922	0.122685	0.239188	No
FXR2	P51116	Fragile X mental retardation syndrome-related protein 2	0.972667	0.00224995	0.0238761	No
FXYD6	Q9H0Q3	FXYD domain-containing ion transport regulator 6	-2.36964	0.142371	0.260744	No
G3BP1	Q13283	Ras GTPase-activating protein-binding protein 1	2.36188	0.0603019	0.153089	No
G3BP2	Q9UN86	Ras GTPase-activating protein-binding protein 2	0.421017	0.115254	0.229216	No
G6PD	P11413	Glucose-6-phosphate 1-dehydrogenase	-0.629788	0.131984	0.249996	No
GABARAPL2	P60520	Gamma-aminobutyric acid receptor-associated protein-like 2	-2.98634	0.0156373	0.0668838	No
GABBR1	Q9UBS5	Gamma-aminobutyric acid type B receptor subunit 1	-0.833697	0.0100714	0.0536646	No
GABBR2	O75899	Gamma-aminobutyric acid type B receptor subunit 2	0.26926	0.38738	0.508487	No
GABRA1	P14867	Gamma-aminobutyric acid receptor subunit alpha-1	-0.235107	0.549734	0.653393	No
GABRB2	P47870	Gamma-aminobutyric acid receptor subunit beta-2	0.143217	0.723902	0.794334	No
GABRB3	P28472	Gamma-aminobutyric acid receptor subunit beta-3	-2.2615	0.119848	0.23585	No
GAD1	Q99259	Glutamate decarboxylase 1	1.40474	0.0106293	0.054668	No
GAD2	Q05329	Glutamate decarboxylase 2	0.532608	0.152066	0.272981	No
GAK	O14976	Cyclin-G-associated kinase	0.428372	0.0764228	0.175528	No
GALK1	P51570	Galactokinase	0.524704	0.0653186	0.159183	No
GANAB	Q14697	Neutral alpha-glucosidase AB	-0.315484	0.108013	0.219784	No
GAP43	P17677	Neuromodulin	-0.724815	0.0138925	0.062994	No
GAPDH	P04406	Glyceraldehyde-3-phosphate dehydrogenase	-1.18996	0.0036477	0.031965	No
GAPVD1	Q14C86	GTPase-activating protein and VPS9 domain-containing protein 1	0.464535	0.0744297	0.173004	No
GARS	P41250	Glycine--tRNA ligase	-0.789508	0.0550616	0.143503	No
GART	P22102	Trifunctional purine biosynthetic protein adenosine-3;Phosphoribosylamine--glycine ligase;Phosphoribosylformylglycinamidine cyclo-ligase;Phosphoribosylglycinamide formyltransferase	0.883743	0.0090242	0.0506604	No
GAS7	O60861	Growth arrest-specific protein 7	-1.64659	0.0581121	0.149287	No
GBAS	O75323	Protein NipSnap homolog 2	-3.10848	0.163931	0.285953	No
GBE1	Q04446	1,4-alpha-glucan-branching enzyme	1.03827	0.00110549	0.0149927	No
GCLC	P48506	Glutamate--cysteine ligase catalytic subunit	-1.68082	0.177988	0.300026	No
GDAP1	Q8TB36	Ganglioside-induced differentiation-associated protein 1	0.427985	0.056177	0.145505	No
GDI1	P31150	Rab GDP dissociation inhibitor alpha	-0.878776	0.0455696	0.126919	No
GDI2	P50395	Rab GDP dissociation inhibitor beta	-1.42675	0.00265973	0.0262323	No
GDPD1	Q8N9F7	Glycerophosphodiester phosphodiesterase domain-containing protein 1	-1.64736	0.146818	0.267764	No
GET4	Q7L5D6	Golgi to ER traffic protein 4 homolog	-0.85102	0.45195	0.56691	No
GFAP	P14136	Glial fibrillary acidic protein	-0.0659864	0.925821	0.950383	No
GFM1	Q96RP9	Elongation factor G, mitochondrial	-0.811404	0.0397951	0.11747	No
GGA1	Q9UJY5	ADP-ribosylation factor-binding protein GGA1	-1.68885	0.142094	0.260472	No
GGA3	Q9NZ52	ADP-ribosylation factor-binding protein GGA3	-0.944117	0.452977	0.56768	No
GGT7	Q9UJ14	Gamma-glutamyltransferase 7;Gamma-glutamyltransferase 7 heavy chain;Gamma-glutamyltransferase 7 light chain	0.72122	0.00330994	0.0299442	No
GIPC1	O14908	PDZ domain-containing protein GIPC1	-0.478196	0.18675	0.310223	No
GIT1	Q9Y2X7	ARF GTPase-activating protein GIT1	0.796115	0.0199117	0.0756817	No
GK	P32189	Glycerol kinase;Putative glycerol kinase 3	0.301077	0.305941	0.433	No
GLIPR2	Q9H4G4	Golgi-associated plant pathogenesis-related protein 1	-0.86152	0.0547083	0.143033	No
GLO1	Q04760	Lactoylglutathione lyase	-0.623704	0.592784	0.690209	No
GLOD4	Q9HC38	Glyoxalase domain-containing protein 4	-3.47949	0.0416779	0.120909	No
GLRX3	O76003	Glutaredoxin-3	-0.946931	0.504448	0.613484	No
GLRX5	Q86SX6	Glutaredoxin-related protein 5, mitochondrial	-0.941811	0.351054	0.477761	No
GLS	O94925	Glutaminase kidney isoform, mitochondrial	0.290594	0.258188	0.385596	No
GMFB	P60983	Glia maturation factor beta	-0.725902	0.148737	0.269505	No
GNA11	P29992	Guanine nucleotide-binding protein subunit alpha-11	1.09846	0.00468355	0.0356943	No
GNA13	Q14344	Guanine nucleotide-binding protein subunit alpha-13	-0.537547	0.152753	0.27336	No
GNAI1	P63096	Guanine nucleotide-binding protein G(i) subunit alpha-1	-0.142395	0.478512	0.59022	No
GNAI2	P04899	Guanine nucleotide-binding protein G(i) subunit alpha-2	0.12409	0.54014	0.645959	No
GNAI3	P08754	Guanine nucleotide-binding protein G(k) subunit alpha	-1.37774	0.207909	0.332924	No
GNAO1	P09471	Guanine nucleotide-binding protein G(o) subunit alpha	0.233942	0.264569	0.391481	No
GNAQ	P50148	Guanine nucleotide-binding protein G(q) subunit alpha	0.190272	0.30737	0.434289	No
GNAS	Q5JWF2	Guanine nucleotide-binding protein G(s) subunit alpha isoforms XLas;Guanine nucleotide-binding protein G(s) subunit alpha isoforms short	0.216322	0.342462	0.471425	No
GNAZ	P19086	Guanine nucleotide-binding protein G(z) subunit alpha	0.194747	0.368721	0.492751	No
GNB1	P62873	Guanine nucleotide-binding protein G(I)/G(S)/G(T) subunit beta-1	-0.195681	0.45317	0.56768	No
GNB2	P62879	Guanine nucleotide-binding protein G(I)/G(S)/G(T) subunit beta-2	-0.566113	0.120284	0.23634	No
GNB2L1	P63244	Guanine nucleotide-binding protein subunit beta-2-like 1;Guanine nucleotide-binding protein subunit beta-2-like 1, N-terminally processed	-0.861626	0.00352148	0.0314061	No
GNB4	Q9HAV0	Guanine nucleotide-binding protein subunit beta-4	-1.25754	0.507992	0.616304	No
GNB5	O14775	Guanine nucleotide-binding protein subunit beta-5	1.57988	0.265886	0.392897	No
GNG10	P50151	Guanine nucleotide-binding protein G(I)/G(S)/G(O) subunit gamma-10	0.0805512	0.915319	0.942681	No
GNG12	Q9UBI6	Guanine nucleotide-binding protein G(I)/G(S)/G(O) subunit gamma-12	-0.944194	0.293785	0.421488	No
GNG2	P59768	Guanine nucleotide-binding protein G(I)/G(S)/G(O) subunit gamma-2	0.520344	0.171872	0.294206	No
GNG3	P63215	Guanine nucleotide-binding protein G(I)/G(S)/G(O) subunit gamma-3	0.998301	0.0427201	0.12251	No
GNG5	P63218	Guanine nucleotide-binding protein G(I)/G(S)/G(O) subunit gamma-5	-3.31821	0.0380355	0.114562	No
GNG7	O60262	Guanine nucleotide-binding protein G(I)/G(S)/G(O) subunit gamma-7	-0.493473	0.061401	0.153378	No
GNL1	P36915	Guanine nucleotide-binding protein-like 1	0.340534	0.147332	0.268111	No
GOLGA3	Q08378	Golgin subfamily A member 3	0.1565	0.521172	0.628355	No
GOLGA7	Q7Z5G4	Golgin subfamily A member 7	-0.71112	0.465645	0.578892	No
GOT1	P17174	Aspartate aminotransferase, cytoplasmic	-0.462142	0.242748	0.369898	No
GOT2	P00505	Aspartate aminotransferase, mitochondrial	0.171048	0.343387	0.471927	No
GPC1	P35052	Glypican-1;Secreted glypican-1	0.31709	0.174291	0.295978	No
GPD1	P21695	Glycerol-3-phosphate dehydrogenase [NAD(+)], cytoplasmic	-1.79072	0.0166229	0.0689647	No
GPD1L	Q8N335	Glycerol-3-phosphate dehydrogenase 1-like protein	-1.26845	0.0184175	0.0724884	No
GPD2	P43304	Glycerol-3-phosphate dehydrogenase, mitochondrial	0.741763	0.0188581	0.0736461	No
GPI	P06744	Glucose-6-phosphate isomerase	-0.489116	0.129709	0.248191	No
GPM6A	P51674	Neuronal membrane glycoprotein M6-a	-0.137784	0.663115	0.750893	No
GPM6B	Q13491	Neuronal membrane glycoprotein M6-b	-2.55012	0.103647	0.21349	No
GPR158	Q5T848	Probable G-protein coupled receptor 158	0.321293	0.222955	0.34893	No
GPRC5B	Q9NZH0	G-protein coupled receptor family C group 5 member B	-2.32409	0.0415569	0.120827	No
GPRIN1	Q7Z2K8	G protein-regulated inducer of neurite outgrowth 1	0.137321	0.775005	0.835823	No
GPS1	Q13098	COP9 signalosome complex subunit 1	-0.224695	0.519076	0.626127	No
GPSM1	Q86YR5	G-protein-signaling modulator 1	0.727764	0.011501	0.0571643	No
GPX1	P07203	Glutathione peroxidase 1	-0.273874	0.479207	0.590787	No
GPX4	P36969	Phospholipid hydroperoxide glutathione peroxidase, mitochondrial	-0.20859	0.355786	0.482894	No
GRIA1	P42261	Glutamate receptor 1	0.259738	0.41195	0.532675	No
GRIA2	P42262	Glutamate receptor 2	-1.50382	0.0103634	0.0540747	No
GRIA3	P42263	Glutamate receptor 3	-0.0972983	0.676508	0.758884	No
GRIA4	P48058	Glutamate receptor 4	-1.85695	0.121622	0.237872	No
GRIN1	Q05586	Glutamate receptor ionotropic, NMDA 1	0.0214032	0.962542	0.974162	No
GRIN2A	Q12879	Glutamate receptor ionotropic, NMDA 2A	-2.13297	0.134175	0.252206	No
GRIN2B	Q13224	Glutamate receptor ionotropic, NMDA 2B	-0.0677407	0.839414	0.883686	No
GRIPAP1	Q4V328	GRIP1-associated protein 1	0.553446	0.0151031	0.0653776	No
GRM2	Q14416	Metabotropic glutamate receptor 2	0.78791	0.0839333	0.186477	No
GRM3	Q14832	Metabotropic glutamate receptor 3	-0.0281404	0.951721	0.967885	No
GRM5	P41594	Metabotropic glutamate receptor 5	-0.699621	0.623955	0.716531	No
GRPEL1	Q9HAV7	GrpE protein homolog 1, mitochondrial	0.11663	0.83095	0.878453	No
GRSF1	Q12849	G-rich sequence factor 1	-0.37882	0.76567	0.827529	No
GSK3A	P49840	Glycogen synthase kinase-3 alpha	-0.14696	0.65325	0.742525	No
GSK3B	P49841	Glycogen synthase kinase-3 beta	0.106164	0.790461	0.848488	No
GSN	P06396	Gelsolin	-1.95145	0.0123175	0.0598039	No
GSPT1	P15170	Eukaryotic peptide chain release factor GTP-binding subunit ERF3A;Eukaryotic peptide chain release factor GTP-binding subunit ERF3B	0.668181	0.0250383	0.0874602	No
GSR	P00390	Glutathione reductase, mitochondrial	-1.02783	0.00326473	0.0296624	No
GSS	P48637	Glutathione synthetase	-0.223913	0.333928	0.462206	No
GSTK1	Q9Y2Q3	Glutathione S-transferase kappa 1	0.0520063	0.809954	0.864989	No
GSTM2	P28161	Glutathione S-transferase Mu 2	-1.32711	0.00193404	0.0213295	No
GSTM3	P21266	Glutathione S-transferase Mu 3	-0.51002	0.202224	0.326441	No
GSTO1	P78417	Glutathione S-transferase omega-1	-0.954049	0.0424811	0.122309	No
GSTP1	P09211	Glutathione S-transferase P	-0.703094	0.0512042	0.13729	No
GTPBP1	O00178	GTP-binding protein 1	1.39696	0.0353495	0.109488	No
GUCY1A2	P33402	Guanylate cyclase soluble subunit alpha-2	-1.0462	0.533234	0.639829	No
GUCY1B3	Q02153	Guanylate cyclase soluble subunit beta-1	-0.311565	0.371546	0.493959	No
GUK1	Q16774	Guanylate kinase	1.21556	0.00725011	0.0438869	No
GYS1	P13807	Glycogen [starch] synthase, muscle	-1.58264	0.229779	0.355628	No
H1F0	P07305	Histone H1.0;Histone H1.0, N-terminally processed	1.65043	0.215591	0.341228	No
H2AFX	P16104	Histone H2AX	3.5426	0.0602904	0.153089	No
H2AFY	O75367	Core histone macro-H2A.1	1.01242	0.00725923	0.0438869	No
HACD3	Q9P035	Very-long-chain (3R)-3-hydroxyacyl-CoA dehydratase 3	0.143161	0.567625	0.667404	No
HADH	Q16836	Hydroxyacyl-coenzyme A dehydrogenase, mitochondrial	-1.43951	0.000165694	0.00401176	No
HADHA	P40939	Trifunctional enzyme subunit alpha, mitochondrial;Long-chain enoyl-CoA hydratase;Long chain 3-hydroxyacyl-CoA dehydrogenase	-0.943735	0.00063962	0.0103118	No
HADHB	P55084	Trifunctional enzyme subunit beta, mitochondrial;3-ketoacyl-CoA thiolase	-0.914909	0.00100721	0.0142311	No
HAPLN1	P10915	Hyaluronan and proteoglycan link protein 1	0.0818387	0.852102	0.893677	No
HAPLN2	Q9GZV7	Hyaluronan and proteoglycan link protein 2	-3.25981	0.0479545	0.131093	No
HAPLN4	Q86UW8	Hyaluronan and proteoglycan link protein 4	-2.22637	0.137115	0.254874	No
HARS	P12081	Histidine--tRNA ligase, cytoplasmic	-0.684159	0.0775869	0.177392	No
HAX1	O00165	HCLS1-associated protein X-1	2.09108	0.024772	0.0871483	No
HBA1	P69905	Hemoglobin subunit alpha	2.26804	0.0891873	0.193928	No
HBB	P68871	Hemoglobin subunit beta;LVV-hemorphin-7;Spinorphin	1.93296	0.178798	0.300705	No
HBD	P02042	Hemoglobin subunit delta	2.09109	0.333226	0.461489	No
HBS1L	Q9Y450	HBS1-like protein	-0.101178	0.688119	0.766041	No
HCN1	O60741	Potassium/sodium hyperpolarization-activated cyclic nucleotide-gated channel 1	-2.32808	0.104052	0.213992	No
HDHD2	Q9H0R4	Haloacid dehalogenase-like hydrolase domain-containing protein 2	-3.71556	0.0242291	0.0858257	No
HDLBP	Q00341	Vigilin	-0.307774	0.254448	0.380915	No
HEBP1	Q9NRV9	Heme-binding protein 1	-1.1607	0.0903763	0.195573	No
HECTD4	Q9Y4D8	Probable E3 ubiquitin-protein ligase HECTD4	-1.60951	0.230692	0.356821	No
HECW2	Q9P2P5	E3 ubiquitin-protein ligase HECW2	0.168351	0.510756	0.61787	No
HEPACAM	Q14CZ8	Hepatocyte cell adhesion molecule	-0.529555	0.136713	0.254314	No
HGS	O14964	Hepatocyte growth factor-regulated tyrosine kinase substrate	-0.435282	0.334616	0.462903	No
HIBCH	Q6NVY1	3-hydroxyisobutyryl-CoA hydrolase, mitochondrial	-0.746936	0.0473534	0.130015	No
HIGD1A	Q9Y241	HIG1 domain family member 1A, mitochondrial	1.47241	0.0107004	0.0548083	No
HINT1	P49773	Histidine triad nucleotide-binding protein 1	-2.64425	0.0385473	0.115428	No
HINT3	Q9NQE9	Histidine triad nucleotide-binding protein 3	-1.89263	0.227432	0.352428	No
HIP1	O00291	Huntingtin-interacting protein 1	0.351999	0.604557	0.70035	No
HIP1R	O75146	Huntingtin-interacting protein 1-related protein	-0.239722	0.226968	0.35236	No
HIST1H1C	P16403	Histone H1.2	3.3976	0.0103976	0.054084	No
HIST1H1E	P10412	Histone H1.4;Histone H1.3	3.59928	0.00999526	0.0536646	No
HK1	P19367	Hexokinase-1	0.411232	0.0460924	0.128091	No
HMGB1	P09429	High mobility group protein B1	-0.324368	0.812769	0.866518	No
HMGCS1	Q01581	Hydroxymethylglutaryl-CoA synthase, cytoplasmic	-2.81452	0.0530184	0.139763	No
HMOX2	P30519	Heme oxygenase 2	0.296476	0.165718	0.287748	No
HNRNPA0	Q13151	Heterogeneous nuclear ribonucleoprotein A0	-0.388154	0.630683	0.722627	No
HNRNPA1	P09651	Heterogeneous nuclear ribonucleoprotein A1;Heterogeneous nuclear ribonucleoprotein A1, N-terminally processed;Heterogeneous nuclear ribonucleoprotein A1-like 2	1.43168	0.00016361	0.00401176	No
HNRNPA3	P51991	Heterogeneous nuclear ribonucleoprotein A3	1.2569	0.000884371	0.0130916	No
HNRNPC	P07910	Heterogeneous nuclear ribonucleoproteins C1/C2	1.13115	0.00457668	0.0351399	No
HNRNPD	Q14103	Heterogeneous nuclear ribonucleoprotein D0	-0.283823	0.295846	0.42372	No
HNRNPDL	O14979	Heterogeneous nuclear ribonucleoprotein D-like	-0.398803	0.221458	0.348322	No
HNRNPF	P52597	Heterogeneous nuclear ribonucleoprotein F;Heterogeneous nuclear ribonucleoprotein F, N-terminally processed	1.87948	0.173918	0.295603	No
HNRNPH1	P31943	Heterogeneous nuclear ribonucleoprotein H;Heterogeneous nuclear ribonucleoprotein H, N-terminally processed	0.766818	0.00696346	0.0431357	No
HNRNPH2	P55795	Heterogeneous nuclear ribonucleoprotein H2	1.12808	0.00243895	0.0249348	No
HNRNPH3	P31942	Heterogeneous nuclear ribonucleoprotein H3	0.617469	0.157918	0.278906	No
HNRNPK	P61978	Heterogeneous nuclear ribonucleoprotein K	0.362179	0.124938	0.241894	No
HNRNPL	P14866	Heterogeneous nuclear ribonucleoprotein L	0.0169566	0.968041	0.977154	No
HNRNPLL	Q8WVV9	Heterogeneous nuclear ribonucleoprotein L-like	-1.06125	0.306453	0.433481	No
HNRNPM	P52272	Heterogeneous nuclear ribonucleoprotein M	1.06135	0.00126842	0.0162759	No
HNRNPR	O43390	Heterogeneous nuclear ribonucleoprotein R	0.925685	0.00277087	0.0269063	No
HNRNPU	Q00839	Heterogeneous nuclear ribonucleoprotein U	1.0108	0.00130509	0.0166329	No
HNRNPUL2	Q1KMD3	Heterogeneous nuclear ribonucleoprotein U-like protein 2	0.725855	0.00272951	0.0266075	No
HOMER1	Q86YM7	Homer protein homolog 1	-0.0391385	0.939174	0.959781	No
HOOK3	Q86VS8	Protein Hook homolog 3	9.08622e-06	0.999974	0.999974	No
HP1BP3	Q5SSJ5	Heterochromatin protein 1-binding protein 3	0.282198	0.587085	0.684525	No
HPCA	P84074	Neuron-specific calcium-binding protein hippocalcin	-3.17218	0.0113945	0.0569098	No
HPCAL1	P37235	Hippocalcin-like protein 1	-3.483	0.0237875	0.0852215	No
HPCAL4	Q9UM19	Hippocalcin-like protein 4	-3.16151	0.0665962	0.160893	No
HS1BP3	Q53T59	HCLS1-binding protein 3	0.709851	0.014478	0.0637972	No
HSBP1	O75506	Heat shock factor-binding protein 1	1.05085	0.00975607	0.0531094	No
HSD17B12	Q53GQ0	Very-long-chain 3-oxoacyl-CoA reductase	-0.260148	0.423678	0.543648	No
HSD17B4	P51659	Peroxisomal multifunctional enzyme type 2;(3R)-hydroxyacyl-CoA dehydrogenase;Enoyl-CoA hydratase 2	-0.0878555	0.659511	0.747485	No
HSDL1	Q3SXM5	Inactive hydroxysteroid dehydrogenase-like protein 1	-0.19218	0.682369	0.762737	No
HSDL2	Q6YN16	Hydroxysteroid dehydrogenase-like protein 2	-1.39996	0.000301436	0.0063176	No
HSP90AA1	P07900	Heat shock protein HSP 90-alpha	0.118631	0.814268	0.866645	No
HSP90AB1	P08238	Heat shock protein HSP 90-beta	0.672007	0.0602428	0.153089	No
HSP90B1	P14625	Endoplasmin	0.0933706	0.758309	0.821338	No
HSPA12A	O43301	Heat shock 70 kDa protein 12A	0.334776	0.14245	0.260744	No
HSPA12B	Q96MM6	Heat shock 70 kDa protein 12B	-1.71499	0.116152	0.230381	No
HSPA13	P48723	Heat shock 70 kDa protein 13	-0.687321	0.225846	0.351849	No
HSPA1B	P0DMV9	Heat shock 70 kDa protein 1B;Heat shock 70 kDa protein 1A	0.0710612	0.782432	0.842027	No
HSPA4	P34932	Heat shock 70 kDa protein 4	-1.05889	0.0358978	0.110545	No
HSPA4L	O95757	Heat shock 70 kDa protein 4L	0.088677	0.80996	0.864989	No
HSPA5	P11021	78 kDa glucose-regulated protein	0.861307	0.0355985	0.110123	No
HSPA6	P17066	Heat shock 70 kDa protein 6;Putative heat shock 70 kDa protein 7	-3.47543	0.0604146	0.153089	No
HSPA8	P11142	Heat shock cognate 71 kDa protein	-0.205216	0.492411	0.60381	No
HSPA9	P38646	Stress-70 protein, mitochondrial	0.164642	0.626739	0.718764	No
HSPB1	P04792	Heat shock protein beta-1	0.808444	0.227349	0.352428	No
HSPD1	P10809	60 kDa heat shock protein, mitochondrial	-0.939531	0.00306874	0.028691	No
HSPG2	P98160	Basement membrane-specific heparan sulfate proteoglycan core protein;Endorepellin;LG3 peptide	1.03609	0.0808496	0.181875	No
HSPH1	Q92598	Heat shock protein 105 kDa	-0.675485	0.123184	0.239233	No
HTRA2	O43464	Serine protease HTRA2, mitochondrial	-1.4596	0.2664	0.393421	No
HTT	P42858	Huntingtin	-0.202663	0.303703	0.430803	No
HUWE1	Q7Z6Z7	E3 ubiquitin-protein ligase HUWE1	0.255309	0.204746	0.329665	No
HYOU1	Q9Y4L1	Hypoxia up-regulated protein 1	0.654297	0.0421228	0.121629	No
IARS	P41252	Isoleucine--tRNA ligase, cytoplasmic	0.0561757	0.870152	0.908229	No
IARS2	Q9NSE4	Isoleucine--tRNA ligase, mitochondrial	-0.132107	0.652636	0.742506	No
ICA1	Q05084	Islet cell autoantigen 1	-1.95763	0.198982	0.32378	No
ICAM5	Q9UMF0	Intercellular adhesion molecule 5	1.46312	0.0209873	0.0785464	No
IDH2	P48735	Isocitrate dehydrogenase [NADP], mitochondrial	-0.729792	0.0236803	0.0849585	No
IDH3A	P50213	Isocitrate dehydrogenase [NAD] subunit alpha, mitochondrial	-0.556691	0.133262	0.25124	No
IDH3B	O43837	Isocitrate dehydrogenase [NAD] subunit beta, mitochondrial	-0.552938	0.0941016	0.200274	No
IFT27	Q9BW83	Intraflagellar transport protein 27 homolog	2.56399	0.0813224	0.182466	No
IGBP1	P78318	Immunoglobulin-binding protein 1	0.555093	0.015856	0.0672477	No
IGHG1	P0DOX5	Ig gamma-1 chain C region	-1.17124	0.0467841	0.129488	No
IGSF21	Q96ID5	Immunoglobulin superfamily member 21	0.0810366	0.763834	0.82655	No
IGSF8	Q969P0	Immunoglobulin superfamily member 8	-0.0318668	0.926685	0.950883	No
IKBKAP	O95163	Elongator complex protein 1	-1.29953	0.222924	0.34893	No
ILF3	Q12906	Interleukin enhancer-binding factor 3	-1.09933	0.00815136	0.0468454	No
ILK	Q13418	Integrin-linked protein kinase	-1.35993	0.344301	0.472921	No
ILVBL	A1L0T0	Acetolactate synthase-like protein	0.365622	0.190724	0.315136	No
IMMT	Q16891	MICOS complex subunit MIC60	0.412377	0.138486	0.256462	No
IMPDH2	P12268	Inosine-5-monophosphate dehydrogenase 2	0.399699	0.285735	0.41205	No
INA	Q16352	Alpha-internexin	0.558155	0.0338486	0.106146	No
INF2	Q27J81	Inverted formin-2	-0.353196	0.392326	0.513372	No
INPP1	P49441	Inositol polyphosphate 1-phosphatase	-3.87159	0.0495379	0.134544	No
INPP4A	Q96PE3	Type I inositol 3,4-bisphosphate 4-phosphatase	0.0441964	0.884393	0.91911	No
INPP5A	Q14642	Type I inositol 1,4,5-trisphosphate 5-phosphatase	-4.30822	0.0142038	0.0633379	No
IPO5	O00410	Importin-5	-1.0915	0.0508483	0.1368	No
IPO7	O95373	Importin-7	-0.505664	0.176633	0.298542	No
IPO9	Q96P70	Importin-9	-1.13321	0.314061	0.442005	No
IQGAP1	P46940	Ras GTPase-activating-like protein IQGAP1	-0.60654	0.490071	0.60182	No
IQSEC1	Q6DN90	IQ motif and SEC7 domain-containing protein 1	0.179139	0.396585	0.516793	No
IQSEC2	Q5JU85	IQ motif and SEC7 domain-containing protein 2	0.187221	0.62289	0.715655	No
IQSEC3	Q9UPP2	IQ motif and SEC7 domain-containing protein 3	0.852234	0.0251571	0.0876567	No
IRGQ	Q8WZA9	Immunity-related GTPase family Q protein	-0.275794	0.668126	0.753222	No
ISCA1	Q9BUE6	Iron-sulfur cluster assembly 1 homolog, mitochondrial	-0.989829	0.407095	0.527482	No
IST1	P53990	IST1 homolog	-0.0957332	0.764106	0.82655	No
ITCH	Q96J02	E3 ubiquitin-protein ligase Itchy homolog;NEDD4-like E3 ubiquitin-protein ligase WWP1	-2.39553	0.0889194	0.193789	No
ITFG1	Q8TB96	T-cell immunomodulatory protein	0.200266	0.424281	0.543983	No
ITGAV	P06756	Integrin alpha-V;Integrin alpha-V heavy chain;Integrin alpha-V light chain	0.227501	0.365251	0.489924	No
ITGB1	P05556	Integrin beta-1	0.64531	0.135142	0.253174	No
ITGB8	P26012	Integrin beta-8	0.0491155	0.84587	0.888994	No
ITPKA	P23677	Inositol-trisphosphate 3-kinase A	0.389574	0.545238	0.649277	No
ITPR1	Q14643	Inositol 1,4,5-trisphosphate receptor type 1	-0.085453	0.813954	0.866645	No
IVD	P26440	Isovaleryl-CoA dehydrogenase, mitochondrial	-0.585045	0.0863438	0.190153	No
JAM2	P57087	Junctional adhesion molecule B	-2.4105	0.0873982	0.191636	No
KALRN	O60229	Kalirin	-1.18075	0.347757	0.475008	No
KARS	Q15046	Lysine--tRNA ligase	0.74434	0.020135	0.0761495	No
KATNAL1	Q9BW62	Katanin p60 ATPase-containing subunit A-like 1	-2.36571	0.0805954	0.181629	No
KBTBD11	O94819	Kelch repeat and BTB domain-containing protein 11	0.0206103	0.947816	0.964693	No
KCNAB2	Q13303	Voltage-gated potassium channel subunit beta-2	-0.839848	0.0325549	0.103903	No
KCNJ10	P78508	ATP-sensitive inward rectifier potassium channel 10	-3.15825	0.0108924	0.0553421	No
KCNMA1	Q12791	Calcium-activated potassium channel subunit alpha-1	-0.749889	0.461478	0.575233	No
KCNQ2	O43526	Potassium voltage-gated channel subfamily KQT member 2	-1.32581	0.35931	0.484945	No
KCTD12	Q96CX2	BTB/POZ domain-containing protein KCTD12	-0.0726542	0.807408	0.863384	No
KCTD16	Q68DU8	BTB/POZ domain-containing protein KCTD16	0.155746	0.70274	0.778679	No
KCTD8	Q6ZWB6	BTB/POZ domain-containing protein KCTD8	0.661303	0.0317769	0.10246	No
KHDRBS1	Q07666	KH domain-containing, RNA-binding, signal transduction-associated protein 1	0.367176	0.275458	0.402777	No
KHDRBS3	O75525	KH domain-containing, RNA-binding, signal transduction-associated protein 3	0.446078	0.0430722	0.122959	No
KHSRP	Q92945	Far upstream element-binding protein 2	-0.0894408	0.73917	0.807564	No
KIAA0196	Q12768	WASH complex subunit strumpellin	-2.02244	0.0934093	0.19985	No
KIAA0513	O60268	Uncharacterized protein KIAA0513	0.778734	0.12318	0.239233	No
KIAA1033	Q2M389	WASH complex subunit 7	-1.85083	0.0912622	0.196832	No
KIAA1045	Q9UPV7	Protein KIAA1045	0.685535	0.0194573	0.0748215	No
KIAA1107	Q9UPP5	Uncharacterized protein KIAA1107	-0.433371	0.164547	0.286391	No
KIAA1211L	Q6NV74	Uncharacterized protein KIAA1211-like	0.112025	0.66256	0.750603	No
KIAA1468	Q9P260	LisH domain and HEAT repeat-containing protein KIAA1468	0.545361	0.11213	0.224528	No
KIAA1549	Q9HCM3	UPF0606 protein KIAA1549	1.01745	0.0213996	0.0798366	No
KIAA1549L	Q6ZVL6	UPF0606 protein KIAA1549L	0.17189	0.580617	0.679187	No
KIAA1598	A0MZ66	Shootin-1	0.479839	0.0971088	0.204718	No
KIF1A	Q12756	Kinesin-like protein KIF1A	-0.0951261	0.704062	0.778679	No
KIF21A	Q7Z4S6	Kinesin-like protein KIF21A	0.332828	0.077954	0.177585	No
KIF21B	O75037	Kinesin-like protein KIF21B	-1.46807	0.264332	0.391481	No
KIF2A	O00139	Kinesin-like protein KIF2A	0.304315	0.175162	0.297056	No
KIF3A	Q9Y496	Kinesin-like protein KIF3A	0.0310076	0.895344	0.926662	No
KIF3B	O15066	Kinesin-like protein KIF3B;Kinesin-like protein KIF3B, N-terminally processed	1.00642	0.00759314	0.0452458	No
KIF5A	Q12840	Kinesin heavy chain isoform 5A	-2.0141	0.210171	0.33582	No
KIF5B	P33176	Kinesin-1 heavy chain	0.0264191	0.921921	0.94754	No
KIF5C	O60282	Kinesin heavy chain isoform 5C	-0.132538	0.752	0.816262	No
KLC1	Q07866	Kinesin light chain 1	-0.48054	0.156807	0.277952	No
KLC2	Q9H0B6	Kinesin light chain 2	0.536264	0.0258548	0.0885936	No
KPNA3	O00505	Importin subunit alpha-4	-2.29135	0.11886	0.234456	No
KPNA6	O60684	Importin subunit alpha-7	0.530617	0.0477364	0.130781	No
KPNB1	Q14974	Importin subunit beta-1	0.427821	0.063366	0.156548	No
KTN1	Q86UP2	Kinectin	-0.113012	0.688675	0.766041	No
L1CAM	P32004	Neural cell adhesion molecule L1	0.471057	0.168065	0.29022	No
LAMB2	P55268	Laminin subunit beta-2	0.715691	0.009691	0.0529845	No
LAMC1	P11047	Laminin subunit gamma-1	0.584639	0.0502206	0.135812	No
LAMP1	P11279	Lysosome-associated membrane glycoprotein 1	-1.72556	0.244823	0.371145	No
LAMTOR1	Q6IAA8	Ragulator complex protein LAMTOR1	0.18078	0.486041	0.597747	No
LANCL1	O43813	LanC-like protein 1	-0.435687	0.0935487	0.199894	No
LANCL2	Q9NS86	LanC-like protein 2	-2.04884	0.221966	0.348435	No
LAP3	P28838	Cytosol aminopeptidase	0.375263	0.434231	0.551561	No
LARP1	Q6PKG0	La-related protein 1	0.362008	0.102339	0.212186	No
LARS	Q9P2J5	Leucine--tRNA ligase, cytoplasmic	0.0620451	0.855024	0.896367	No
LARS2	Q15031	Probable leucine--tRNA ligase, mitochondrial	-0.183261	0.612008	0.707353	No
LASP1	Q14847	LIM and SH3 domain protein 1	0.514512	0.237884	0.365027	No
LCP1	P13796	Plastin-2	2.81688	0.0223302	0.0823541	No
LDHA	P00338	L-lactate dehydrogenase A chain	-1.15346	0.00603645	0.040251	No
LDHB	P07195	L-lactate dehydrogenase B chain	-0.913289	0.0321648	0.103446	No
LETM1	O95202	LETM1 and EF-hand domain-containing protein 1, mitochondrial	-0.065636	0.679683	0.761438	No
LGALS1	P09382	Galectin-1	-3.14492	0.0503819	0.135994	No
LHPP	Q9H008	Phospholysine phosphohistidine inorganic pyrophosphate phosphatase	-3.11474	0.0152528	0.0657819	No
LIMCH1	Q9UPQ0	LIM and calponin homology domains-containing protein 1	0.242472	0.296556	0.424013	No
LIMK1	P53667	LIM domain kinase 1	-2.10216	0.103351	0.213055	No
LIN7A	O14910	Protein lin-7 homolog A	0.987132	0.0190081	0.0737737	No
LIN7C	Q9NUP9	Protein lin-7 homolog C	0.000291192	0.999139	0.999536	No
LINGO1	Q96FE5	Leucine-rich repeat and immunoglobulin-like domain-containing nogo receptor-interacting protein 1	-1.07935	0.546969	0.650504	No
LIPE	Q05469	Hormone-sensitive lipase	-0.882298	0.487543	0.599301	No
LLGL1	Q15334	Lethal(2) giant larvae protein homolog 1	-0.418183	0.221688	0.348435	No
LMNA	P02545	Prelamin-A/C;Lamin-A/C	0.193614	0.625128	0.717243	No
LMNB1	P20700	Lamin-B1	0.743652	0.0650825	0.158915	No
LMNB2	Q03252	Lamin-B2	0.628582	0.0298366	0.0983474	No
LMO7	Q8WWI1	LIM domain only protein 7	-0.136975	0.706426	0.780607	No
LNP	Q9C0E8	Protein lunapark	0.477793	0.046911	0.129488	No
LNPEP	Q9UIQ6	Leucyl-cystinyl aminopeptidase;Leucyl-cystinyl aminopeptidase, pregnancy serum form	-1.09497	0.268871	0.395676	No
LONP1	P36776	Lon protease homolog, mitochondrial	0.283336	0.160903	0.282001	No
LPCAT4	Q643R3	Lysophospholipid acyltransferase LPCAT4	-1.69768	0.124249	0.24093	No
LPHN1	O94910	Latrophilin-1	0.499008	0.0507047	0.13668	No
LPHN3	Q9HAR2	Latrophilin-3	0.789675	0.00300755	0.0284024	No
LRP1	Q07954	Prolow-density lipoprotein receptor-related protein 1;Low-density lipoprotein receptor-related protein 1 85 kDa subunit;Low-density lipoprotein receptor-related protein 1 515 kDa subunit;Low-density lipoprotein receptor-related protein 1 intracellular domain	-0.418669	0.178933	0.300705	No
LRPAP1	P30533	Alpha-2-macroglobulin receptor-associated protein	-0.74219	0.595372	0.692581	No
LRPPRC	P42704	Leucine-rich PPR motif-containing protein, mitochondrial	-0.153536	0.393955	0.515235	No
LRRC40	Q9H9A6	Leucine-rich repeat-containing protein 40	0.00444877	0.986006	0.989547	No
LRRC47	Q8N1G4	Leucine-rich repeat-containing protein 47	-0.118705	0.587717	0.684943	No
LRRC57	Q8N9N7	Leucine-rich repeat-containing protein 57	-2.16293	0.201923	0.326441	No
LRRC59	Q96AG4	Leucine-rich repeat-containing protein 59	0.447584	0.40285	0.5236	No
LRRC7	Q96NW7	Leucine-rich repeat-containing protein 7	0.722424	0.181607	0.303887	No
LRSAM1	Q6UWE0	E3 ubiquitin-protein ligase LRSAM1	0.466212	0.0417774	0.120909	No
LSAMP	Q13449	Limbic system-associated membrane protein	-0.758569	0.0074757	0.0447096	No
LSM14B	Q9BX40	Protein LSM14 homolog B	1.02201	0.00676588	0.0427373	No
LTA4H	P09960	Leukotriene A-4 hydrolase	-0.0750737	0.697045	0.773299	No
LUZP1	Q86V48	Leucine zipper protein 1	-1.7615	0.169529	0.291432	No
LYPLAL1	Q5VWZ2	Lysophospholipase-like protein 1	-1.89903	0.16327	0.285355	No
LYRM4	Q9HD34	LYR motif-containing protein 4	-1.59484	0.182019	0.304112	No
LYSMD1	Q96S90	LysM and putative peptidoglycan-binding domain-containing protein 1	0.79769	0.023114	0.0838122	No
LZTFL1	Q9NQ48	Leucine zipper transcription factor-like protein 1	-0.142542	0.654328	0.742951	No
LZTS3	O60299	Leucine zipper putative tumor suppressor 3	-1.65288	0.23846	0.365465	No
MACF1	Q9UPN3	Microtubule-actin cross-linking factor 1, isoforms 1/2/3/5	0.458225	0.064585	0.158315	No
MADD	Q8WXG6	MAP kinase-activating death domain protein	-0.490453	0.124593	0.241411	No
MAGED2	Q9UNF1	Melanoma-associated antigen D2	-1.62717	0.210407	0.335983	No
MAGI2	Q86UL8	Membrane-associated guanylate kinase, WW and PDZ domain-containing protein 2	0.31256	0.311486	0.438872	No
MAL2	Q969L2	Protein MAL2	-4.14623	0.00984678	0.0532573	No
MAOA	P21397	Amine oxidase [flavin-containing] A	0.0774055	0.787865	0.846787	No
MAOB	P27338	Amine oxidase [flavin-containing] B	0.71525	0.0429999	0.122959	No
MAP1A	P78559	Microtubule-associated protein 1A;MAP1A heavy chain;MAP1 light chain LC2	-0.987662	0.0364548	0.11181	No
MAP1B	P46821	Microtubule-associated protein 1B;MAP1B heavy chain;MAP1 light chain LC1	-0.369877	0.204646	0.329665	No
MAP1LC3B	Q9GZQ8	Microtubule-associated proteins 1A/1B light chain 3B;Microtubule-associated proteins 1A/1B light chain 3 beta 2	-1.93721	0.176095	0.298054	No
MAP1S	Q66K74	Microtubule-associated protein 1S;MAP1S heavy chain;MAP1S light chain	-0.563553	0.017678	0.0713648	No
MAP2	P11137	Microtubule-associated protein 2	-0.243107	0.461787	0.575233	No
MAP2K1	Q02750	Dual specificity mitogen-activated protein kinase kinase 1	0.253344	0.371513	0.493959	No
MAP2K2	P36507	Dual specificity mitogen-activated protein kinase kinase 2	0.766468	0.0141371	0.0631525	No
MAP2K4	P45985	Dual specificity mitogen-activated protein kinase kinase 4	0.410626	0.202576	0.326798	No
MAP4	P27816	Microtubule-associated protein 4	-0.202064	0.376791	0.498866	No
MAP4K4	O95819	Mitogen-activated protein kinase kinase kinase kinase 4	0.0611204	0.757061	0.821048	No
MAP6	Q96JE9	Microtubule-associated protein 6	-0.627277	0.0362668	0.111505	No
MAP6D1	Q9H9H5	MAP6 domain-containing protein 1	-2.26608	0.121819	0.238053	No
MAP7D1	Q3KQU3	MAP7 domain-containing protein 1	-0.0802369	0.721137	0.791992	No
MAP7D2	Q96T17	MAP7 domain-containing protein 2	-2.35077	0.0309177	0.101098	No
MAPK1	P28482	Mitogen-activated protein kinase 1	-0.478237	0.152821	0.27336	No
MAPK10	P53779	Mitogen-activated protein kinase 10	-0.884728	0.578273	0.677074	No
MAPK3	P27361	Mitogen-activated protein kinase 3	0.0481562	0.836023	0.881962	No
MAPK8IP3	Q9UPT6	C-Jun-amino-terminal kinase-interacting protein 3	0.0482371	0.863612	0.903112	No
MAPRE1	Q15691	Microtubule-associated protein RP/EB family member 1	-0.932491	0.0311017	0.101454	No
MAPRE2	Q15555	Microtubule-associated protein RP/EB family member 2	0.640178	0.0281291	0.0940092	No
MAPRE3	Q9UPY8	Microtubule-associated protein RP/EB family member 3	0.172574	0.491617	0.603425	No
MAPT	P10636	Microtubule-associated protein tau	-0.137829	0.610553	0.705996	No
MARCKSL1	P49006	MARCKS-related protein	-4.37187	0.011124	0.0561449	No
MARK1	Q9P0L2	Serine/threonine-protein kinase MARK1	0.346825	0.20595	0.331179	No
MARK2	Q7KZI7	Serine/threonine-protein kinase MARK2	0.478012	0.0281467	0.0940092	No
MARS	P56192	Methionine--tRNA ligase, cytoplasmic	0.504576	0.102753	0.21252	No
MAST3	O60307	Microtubule-associated serine/threonine-protein kinase 3	0.54306	0.237385	0.364483	No
MAT2A	P31153	S-adenosylmethionine synthase isoform type-2	-0.513938	0.130157	0.248742	No
MAT2B	Q9NZL9	Methionine adenosyltransferase 2 subunit beta	-0.446497	0.0830107	0.184754	No
MATR3	P43243	Matrin-3	0.576995	0.0114046	0.0569098	No
MBLAC2	Q68D91	Metallo-beta-lactamase domain-containing protein 2	0.448925	0.0804199	0.181558	No
MBP	P02686	Myelin basic protein	-1.61135	0.0139975	0.062994	No
MCCC1	Q96RQ3	Methylcrotonoyl-CoA carboxylase subunit alpha, mitochondrial	0.0258218	0.893751	0.925576	No
MCCC2	Q9HCC0	Methylcrotonoyl-CoA carboxylase beta chain, mitochondrial	-3.23397	0.0130214	0.0615577	No
MCU	Q8NE86	Calcium uniporter protein, mitochondrial	0.753007	0.0165187	0.0689647	No
MDH1	P40925	Malate dehydrogenase, cytoplasmic	-1.11472	0.00194195	0.0213295	No
MDH2	P40926	Malate dehydrogenase, mitochondrial	0.367536	0.0613108	0.153378	No
ME1	P48163	NADP-dependent malic enzyme	-0.919909	0.0092424	0.0511996	No
ME2	P23368	NAD-dependent malic enzyme, mitochondrial	-1.04465	0.0139793	0.062994	No
ME3	Q16798	NADP-dependent malic enzyme, mitochondrial	-1.00107	0.0205796	0.0773929	No
MECP2	P51608	Methyl-CpG-binding protein 2	-0.431629	0.303592	0.430803	No
MFF	Q9GZY8	Mitochondrial fission factor	0.408504	0.0661785	0.160655	No
MFN2	O95140	Mitofusin-2	0.393892	0.0527461	0.139492	No
MGEA5	O60502	Protein O-GlcNAcase	-0.412724	0.0629934	0.155933	No
MGLL	Q99685	Monoglyceride lipase	-2.45066	0.0667629	0.160976	No
MGST3	O14880	Microsomal glutathione S-transferase 3	0.632108	0.111554	0.223876	No
MICAL3	Q7RTP6	Protein-methionine sulfoxide oxidase MICAL3	0.392087	0.0665929	0.160893	No
MICU3	Q86XE3	Calcium uptake protein 3, mitochondrial	0.199269	0.41619	0.537054	No
MIEN1	Q9BRT3	Migration and invasion enhancer 1	2.88051	0.0632825	0.156495	No
MIF	P14174	Macrophage migration inhibitory factor	-1.95426	0.226362	0.352168	No
MINK1	Q8N4C8	Misshapen-like kinase 1	0.0778873	0.804154	0.860616	No
MKL2	Q9ULH7	MKL/myocardin-like protein 2	1.1264	0.0122643	0.0597472	No
MLC1	Q15049	Membrane protein MLC1	-3.30053	0.100261	0.209431	No
MLEC	Q14165	Malectin	0.455648	0.0386514	0.115428	No
MLF2	Q15773	Myeloid leukemia factor 2	0.124915	0.760023	0.82284	No
MLIP	Q5VWP3	Muscular LMNA-interacting protein	-1.92569	0.136562	0.254221	No
MLLT4	P55196	Afadin	0.226959	0.445755	0.561099	No
MLYCD	O95822	Malonyl-CoA decarboxylase, mitochondrial	-0.968347	0.34339	0.471927	No
MMAA	Q8IVH4	Methylmalonic aciduria type A protein, mitochondrial	-0.306769	0.789605	0.848294	No
MMAB	Q96EY8	Cob(I)yrinic acid a,c-diamide adenosyltransferase, mitochondrial	1.7604	0.169261	0.291432	No
MOBP	Q13875	Myelin-associated oligodendrocyte basic protein	-3.07257	0.0254047	0.0878854	No
MOG	Q16653	Myelin-oligodendrocyte glycoprotein	-0.760731	0.105363	0.215612	No
MON2	Q7Z3U7	Protein MON2 homolog	-1.23604	0.119636	0.235696	No
MPC1	Q9Y5U8	Mitochondrial pyruvate carrier 1	-0.0126883	0.984947	0.989274	No
MPC2	O95563	Mitochondrial pyruvate carrier 2	-0.244903	0.51395	0.621136	No
MPP1	Q00013	55 kDa erythrocyte membrane protein	0.0078162	0.976822	0.982683	No
MPP2	Q14168	MAGUK p55 subfamily member 2	0.756642	0.0431415	0.123017	No
MPP6	Q9NZW5	MAGUK p55 subfamily member 6	0.502118	0.0379159	0.114475	No
MPRIP	Q6WCQ1	Myosin phosphatase Rho-interacting protein	0.637126	0.0885262	0.193267	No
MRAS	O14807	Ras-related protein M-Ras	-0.337403	0.17282	0.29475	No
MRE11A	P49959	Double-strand break repair protein MRE11A	1.66948	0.0668227	0.160976	No
MROH1	Q8NDA8	Maestro heat-like repeat-containing protein family member 1	0.383535	0.633605	0.724656	No
MRPL11	Q9Y3B7	39S ribosomal protein L11, mitochondrial	-0.98138	0.412597	0.533238	No
MRPL23	Q16540	39S ribosomal protein L23, mitochondrial	-0.685185	0.49877	0.608345	No
MRPS22	P82650	28S ribosomal protein S22, mitochondrial	-2.39386	0.0689755	0.163663	No
MRPS26	Q9BYN8	28S ribosomal protein S26, mitochondrial	-0.987486	0.296905	0.424207	No
MSN	P26038	Moesin	-0.703832	0.110313	0.222817	No
MTCH1	Q9NZJ7	Mitochondrial carrier homolog 1	-0.25281	0.376877	0.498866	No
MTCH2	Q9Y6C9	Mitochondrial carrier homolog 2	0.325453	0.179506	0.300971	No
MT-CO2	P00403	Cytochrome c oxidase subunit 2	-0.40629	0.111353	0.223876	No
MTDH	Q86UE4	Protein LYRIC	-2.15555	0.168131	0.29022	No
MTFR1L	Q9H019	Mitochondrial fission regulator 1-like	1.31865	0.00560459	0.0388307	No
MTHFD1	P11586	C-1-tetrahydrofolate synthase, cytoplasmic;Methylenetetrahydrofolate dehydrogenase;Methenyltetrahydrofolate cyclohydrolase;Formyltetrahydrofolate synthetase;C-1-tetrahydrofolate synthase, cytoplasmic, N-terminally processed	0.336201	0.144294	0.263736	No
MTMR2	Q13614	Myotubularin-related protein 2	-2.72526	0.0197142	0.0751229	No
MT-ND5	P03915	NADH-ubiquinone oxidoreductase chain 5	-1.64137	0.156845	0.277952	No
MTOR	P42345	Serine/threonine-protein kinase mTOR	0.294234	0.160855	0.282001	No
MTPN	P58546	Myotrophin	-0.135403	0.790357	0.848488	No
MTX1	Q13505	Metaxin-1	0.155408	0.665502	0.752317	No
MTX3	Q5HYI7	Metaxin-3	-1.09812	0.424691	0.544109	No
MUT	P22033	Methylmalonyl-CoA mutase, mitochondrial	-0.147665	0.671083	0.755355	No
MVP	Q14764	Major vault protein	-1.98235	0.226424	0.352168	No
MYADM	Q96S97	Myeloid-associated differentiation marker	0.162837	0.802805	0.859538	No
MYEF2	Q9P2K5	Myelin expression factor 2	1.22101	0.000197975	0.00461025	No
MYH10	P35580	Myosin-10	0.485956	0.0927134	0.198784	No
MYH14	Q7Z406	Myosin-14	-0.467687	0.0455231	0.126919	No
MYH9	P35579	Myosin-9	0.784512	0.0167555	0.0689647	No
MYL12A	P19105	Myosin regulatory light chain 12A;Myosin regulatory light chain 12B	-0.0429174	0.832126	0.879326	No
MYL6	P60660	Myosin light polypeptide 6	0.103364	0.668117	0.753222	No
MYLK	Q15746	Myosin light chain kinase, smooth muscle;Myosin light chain kinase, smooth muscle, deglutamylated form	0.720777	0.0102555	0.0538468	No
MYO18A	Q92614	Unconventional myosin-XVIIIa	0.44034	0.0333905	0.105234	No
MYO1B	O43795	Unconventional myosin-Ib	0.834176	0.0548246	0.143033	No
MYO1D	O94832	Unconventional myosin-Id	-1.53292	0.0503961	0.135994	No
MYO5A	Q9Y4I1	Unconventional myosin-Va	0.642816	0.0128694	0.0609542	No
NAA15	Q9BXJ9	N-alpha-acetyltransferase 15, NatA auxiliary subunit	-0.742441	0.556331	0.658224	No
NACA	E9PAV3	Nascent polypeptide-associated complex subunit alpha, muscle-specific form;Nascent polypeptide-associated complex subunit alpha	-0.97971	0.0277056	0.0934043	No
NAE1	Q13564	NEDD8-activating enzyme E1 regulatory subunit	-0.684205	0.121631	0.237872	No
NAGK	Q9UJ70	N-acetyl-D-glucosamine kinase	-0.836574	0.045408	0.126749	No
NANS	Q9NR45	Sialic acid synthase	-0.992123	0.390982	0.512413	No
NAP1L1	P55209	Nucleosome assembly protein 1-like 1	0.0637647	0.833729	0.88029	No
NAP1L4	Q99733	Nucleosome assembly protein 1-like 4	-0.296447	0.17201	0.294206	No
NAP1L5	Q96NT1	Nucleosome assembly protein 1-like 5	-1.24196	0.364495	0.48954	No
NAPA	P54920	Alpha-soluble NSF attachment protein	-0.54007	0.0683894	0.163187	No
NAPB	Q9H115	Beta-soluble NSF attachment protein	-0.450949	0.151997	0.272981	No
NAPG	Q99747	Gamma-soluble NSF attachment protein	-0.97834	0.0149833	0.0651367	No
NBAS	A2RRP1	Neuroblastoma-amplified sequence	-0.554046	0.493395	0.604427	No
NBEA	Q8NFP9	Neurobeachin	0.551656	0.11569	0.229645	No
NCALD	P61601	Neurocalcin-delta	-1.46707	0.0196436	0.0749676	No
NCAM1	P13591	Neural cell adhesion molecule 1	-0.00888286	0.956207	0.970876	No
NCAM2	O15394	Neural cell adhesion molecule 2	0.317347	0.227688	0.352608	No
NCAN	O14594	Neurocan core protein	0.611977	0.19583	0.320663	No
NCDN	Q9UBB6	Neurochondrin	-0.623398	0.0492763	0.133978	No
NCEH1	Q6PIU2	Neutral cholesterol ester hydrolase 1	0.488835	0.0753629	0.174047	No
NCK2	O43639	Cytoplasmic protein NCK2	0.529118	0.091619	0.19711	No
NCKAP1	Q9Y2A7	Nck-associated protein 1	-0.521037	0.183006	0.305212	No
NCKIPSD	Q9NZQ3	NCK-interacting protein with SH3 domain	-0.0214336	0.969922	0.977306	No
NCL	P19338	Nucleolin	0.85802	0.00122381	0.0159476	No
NCLN	Q969V3	Nicalin	0.433578	0.0231275	0.0838122	No
NCOA7	Q8NI08	Nuclear receptor coactivator 7	-0.203114	0.424903	0.544109	No
NCS1	P62166	Neuronal calcium sensor 1	-0.900508	0.0314722	0.101953	No
NCSTN	Q92542	Nicastrin	-2.55789	0.0282987	0.0942665	No
NDEL1	Q9GZM8	Nuclear distribution protein nudE-like 1	0.183518	0.50074	0.610033	No
NDRG1	Q92597	Protein NDRG1	-0.512058	0.0690727	0.163663	No
NDRG3	Q9UGV2	Protein NDRG3	-0.417506	0.220921	0.347912	No
NDRG4	Q9ULP0	Protein NDRG4	-0.636448	0.0578558	0.148781	No
NDUFA1	O15239	NADH dehydrogenase [ubiquinone] 1 alpha subcomplex subunit 1	-0.964445	0.435701	0.55287	No
NDUFA10	O95299	NADH dehydrogenase [ubiquinone] 1 alpha subcomplex subunit 10, mitochondrial	-0.60535	0.131728	0.249996	No
NDUFA11	Q86Y39	NADH dehydrogenase [ubiquinone] 1 alpha subcomplex subunit 11	-1.12664	0.00267405	0.0262704	No
NDUFA12	Q9UI09	NADH dehydrogenase [ubiquinone] 1 alpha subcomplex subunit 12	-0.928373	0.00177989	0.0201912	No
NDUFA13	Q9P0J0	NADH dehydrogenase [ubiquinone] 1 alpha subcomplex subunit 13	0.695997	0.0103011	0.0539642	No
NDUFA2	O43678	NADH dehydrogenase [ubiquinone] 1 alpha subcomplex subunit 2	-0.822943	0.0442694	0.12424	No
NDUFA4	O00483	Cytochrome c oxidase subunit NDUFA4	-0.235509	0.386121	0.507364	No
NDUFA5	Q16718	NADH dehydrogenase [ubiquinone] 1 alpha subcomplex subunit 5	-1.35459	0.0417644	0.120909	No
NDUFA6	P56556	NADH dehydrogenase [ubiquinone] 1 alpha subcomplex subunit 6	-1.136	0.00698966	0.0431916	No
NDUFA7	O95182	NADH dehydrogenase [ubiquinone] 1 alpha subcomplex subunit 7	-0.701831	0.0977613	0.205921	No
NDUFA8	P51970	NADH dehydrogenase [ubiquinone] 1 alpha subcomplex subunit 8	-0.714417	0.0612692	0.153378	No
NDUFA9	Q16795	NADH dehydrogenase [ubiquinone] 1 alpha subcomplex subunit 9, mitochondrial	-0.281451	0.396045	0.516625	No
NDUFAB1	O14561	Acyl carrier protein, mitochondrial	-1.0648	0.137661	0.255511	No
NDUFAF3	Q9BU61	NADH dehydrogenase [ubiquinone] 1 alpha subcomplex assembly factor 3	-0.088278	0.75157	0.816262	No
NDUFB1	O75438	NADH dehydrogenase [ubiquinone] 1 beta subcomplex subunit 1	0.123685	0.589915	0.687187	No
NDUFB10	O96000	NADH dehydrogenase [ubiquinone] 1 beta subcomplex subunit 10	0.345172	0.176021	0.298054	No
NDUFB11	Q9NX14	NADH dehydrogenase [ubiquinone] 1 beta subcomplex subunit 11, mitochondrial	-3.20193	0.0729736	0.170724	No
NDUFB3	O43676	NADH dehydrogenase [ubiquinone] 1 beta subcomplex subunit 3	0.0801226	0.73308	0.802305	No
NDUFB4	O95168	NADH dehydrogenase [ubiquinone] 1 beta subcomplex subunit 4	0.178163	0.384011	0.505383	No
NDUFB5	O43674	NADH dehydrogenase [ubiquinone] 1 beta subcomplex subunit 5, mitochondrial	-0.465392	0.105972	0.216507	No
NDUFB6	O95139	NADH dehydrogenase [ubiquinone] 1 beta subcomplex subunit 6	-0.360562	0.122297	0.238617	No
NDUFB8	O95169	NADH dehydrogenase [ubiquinone] 1 beta subcomplex subunit 8, mitochondrial	-0.664058	0.138287	0.256462	No
NDUFB9	Q9Y6M9	NADH dehydrogenase [ubiquinone] 1 beta subcomplex subunit 9	-0.317348	0.279248	0.405959	No
NDUFC2	O95298	NADH dehydrogenase [ubiquinone] 1 subunit C2;NADH dehydrogenase [ubiquinone] 1 subunit C2, isoform 2	1.64701	0.0158402	0.0672477	No
NDUFS1	P28331	NADH-ubiquinone oxidoreductase 75 kDa subunit, mitochondrial	-0.659782	0.0364168	0.11181	No
NDUFS2	O75306	NADH dehydrogenase [ubiquinone] iron-sulfur protein 2, mitochondrial	-0.785126	0.0295932	0.0978014	No
NDUFS3	O75489	NADH dehydrogenase [ubiquinone] iron-sulfur protein 3, mitochondrial	-1.16338	0.00880393	0.049757	No
NDUFS5	O43920	NADH dehydrogenase [ubiquinone] iron-sulfur protein 5	0.737589	0.599764	0.697046	No
NDUFS6	O75380	NADH dehydrogenase [ubiquinone] iron-sulfur protein 6, mitochondrial	-1.75827	0.226845	0.35236	No
NDUFS7	O75251	NADH dehydrogenase [ubiquinone] iron-sulfur protein 7, mitochondrial	-0.180105	0.517666	0.625327	No
NDUFS8	O00217	NADH dehydrogenase [ubiquinone] iron-sulfur protein 8, mitochondrial	-0.151398	0.510567	0.61787	No
NEBL	O76041	Nebulette	0.14846	0.680553	0.761783	No
NECAB1	Q8N987	N-terminal EF-hand calcium-binding protein 1	-2.92739	0.0718476	0.168718	No
NECAB2	Q7Z6G3	N-terminal EF-hand calcium-binding protein 2	-3.50556	0.0497566	0.134992	No
NECAP1	Q8NC96	Adaptin ear-binding coat-associated protein 1	-2.41661	0.0941845	0.200274	No
NEDD4L	Q96PU5	E3 ubiquitin-protein ligase NEDD4-like	1.01212	0.00601092	0.040206	No
NEDD8	Q15843	NEDD8	-0.896582	0.556269	0.658224	No
NEFH	P12036	Neurofilament heavy polypeptide	-1.01144	0.0351519	0.109412	No
NEFL	P07196	Neurofilament light polypeptide	0.0306108	0.919659	0.945988	No
NEFM	P07197	Neurofilament medium polypeptide	-0.231816	0.395392	0.516041	No
NEGR1	Q7Z3B1	Neuronal growth regulator 1	-0.125346	0.675686	0.758639	No
NEMF	O60524	Nuclear export mediator factor NEMF	-0.795099	0.29887	0.425742	No
NES	P48681	Nestin	1.33525	0.0134365	0.0626952	No
NF1	P21359	Neurofibromin;Neurofibromin truncated	-0.690537	0.0327913	0.104261	No
NFASC	O94856	Neurofascin	0.0132774	0.933126	0.955153	No
NFS1	Q9Y697	Cysteine desulfurase, mitochondrial	-0.526126	0.0304494	0.0999743	No
NFU1	Q9UMS0	NFU1 iron-sulfur cluster scaffold homolog, mitochondrial	0.0912689	0.688636	0.766041	No
NGEF	Q8N5V2	Ephexin-1	-0.634856	0.154612	0.274999	No
NHP2L1	P55769	NHP2-like protein 1;NHP2-like protein 1, N-terminally processed	-0.425537	0.757775	0.821338	No
NIPSNAP1	Q9BPW8	Protein NipSnap homolog 1	-0.260096	0.436489	0.55359	No
NLN	Q9BYT8	Neurolysin, mitochondrial	-2.01067	0.189255	0.313348	No
NME1	P15531	Nucleoside diphosphate kinase A	-3.78394	0.0443785	0.124289	No
NME2	P22392	Nucleoside diphosphate kinase B;Putative nucleoside diphosphate kinase	-1.30029	0.00078174	0.0118631	No
NMT1	P30419	Glycylpeptide N-tetradecanoyltransferase 1	-1.02839	0.0256004	0.0881383	No
NNT	Q13423	NAD(P) transhydrogenase, mitochondrial	0.196484	0.39847	0.518712	No
NOMO3	P69849	Nodal modulator 3;Nodal modulator 1;Nodal modulator 2	0.29578	0.267356	0.39437	No
NOP56	O00567	Nucleolar protein 56	0.88997	0.0252354	0.0876617	No
NOP58	Q9Y2X3	Nucleolar protein 58	3.58494	0.0195896	0.074875	No
NOS1	P29475	Nitric oxide synthase, brain	-1.21989	0.311366	0.438872	No
NOVA1	P51513	RNA-binding protein Nova-1	0.549992	0.036653	0.112144	No
NOVA2	Q9UNW9	RNA-binding protein Nova-2	1.26008	0.0140015	0.062994	No
NPEPPS	P55786	Puromycin-sensitive aminopeptidase	-0.458315	0.108134	0.219852	No
NPM1	P06748	Nucleophosmin	1.35789	0.000930275	0.0136026	No
NPTN	Q9Y639	Neuroplastin	1.84782	0.0258912	0.0885936	No
NPTX1	Q15818	Neuronal pentraxin-1	-0.803328	0.04916	0.133952	No
NPTXR	O95502	Neuronal pentraxin receptor	0.864916	0.020855	0.0782045	No
NRBP1	Q9UHY1	Nuclear receptor-binding protein	-1.85312	0.140815	0.259155	No
NRBP2	Q9NSY0	Nuclear receptor-binding protein 2	-0.052116	0.835272	0.88154	No
NRCAM	Q92823	Neuronal cell adhesion molecule	0.130998	0.5782	0.677074	No
NRGN	Q92686	Neurogranin;NEUG(55-78)	-0.706072	0.405434	0.525903	No
NRN1	Q9NPD7	Neuritin	-2.66351	0.11546	0.229369	No
NRXN1	Q9ULB1	Neurexin-1	0.508466	0.261909	0.389534	No
NRXN3	Q9Y4C0	Neurexin-3	-0.182589	0.473108	0.586719	No
NSF	P46459	Vesicle-fusing ATPase	0.583898	0.00971382	0.0529941	No
NSFL1C	Q9UNZ2	NSFL1 cofactor p47	0.413751	0.150923	0.272289	No
NT5DC3	Q86UY8	5-nucleotidase domain-containing protein 3	-2.13856	0.0763662	0.175528	No
NT5E	P21589	5-nucleotidase	-3.91579	0.0100541	0.0536646	No
NTM	Q9P121	Neurotrimin	-0.786476	0.0323759	0.103809	No
NTPCR	Q9BSD7	Cancer-related nucleoside-triphosphatase	0.349518	0.154468	0.274938	No
NTRK3	Q16288	NT-3 growth factor receptor;BDNF/NT-3 growth factors receptor	-0.0716814	0.890605	0.923658	No
NUAK1	O60285	NUAK family SNF1-like kinase 1	-2.2822	0.0647181	0.158461	No
NUBPL	Q8TB37	Iron-sulfur protein NUBPL	-0.0187039	0.947689	0.964693	No
NUCB1	Q02818	Nucleobindin-1	-0.264125	0.420375	0.540513	No
NUDC	Q9Y266	Nuclear migration protein nudC	-0.713916	0.040554	0.119012	No
NUDCD2	Q8WVJ2	NudC domain-containing protein 2	0.576508	0.0315826	0.102096	No
NUDCD3	Q8IVD9	NudC domain-containing protein 3	0.444876	0.23613	0.363453	No
NUMA1	Q14980	Nuclear mitotic apparatus protein 1	0.700951	0.076921	0.17619	No
NUMBL	Q9Y6R0	Numb-like protein	0.473218	0.202098	0.326441	No
NUP155	O75694	Nuclear pore complex protein Nup155	-0.643311	0.58349	0.681281	No
NUP93	Q8N1F7	Nuclear pore complex protein Nup93	-1.68658	0.153129	0.273479	No
OAT	P04181	Ornithine aminotransferase, mitochondrial;Ornithine aminotransferase, hepatic form;Ornithine aminotransferase, renal form	-0.648355	0.1997	0.324657	No
OCIAD1	Q9NX40	OCIA domain-containing protein 1	0.0863506	0.758299	0.821338	No
OCRL	Q01968	Inositol polyphosphate 5-phosphatase OCRL-1	-0.128557	0.563723	0.664993	No
OGDH	Q02218	2-oxoglutarate dehydrogenase, mitochondrial	-0.43991	0.03352	0.10551	No
OGDHL	Q9ULD0	2-oxoglutarate dehydrogenase-like, mitochondrial	-0.474168	0.0248804	0.0871506	No
OGT	O15294	UDP-N-acetylglucosamine--peptide N-acetylglucosaminyltransferase 110 kDa subunit	-0.588741	0.209349	0.334719	No
OLA1	Q9NTK5	Obg-like ATPase 1	-0.0838578	0.886583	0.920246	No
OLFM1	Q99784	Noelin	-3.73761	0.071106	0.167746	No
OLFM3	Q96PB7	Noelin-3	-0.0592476	0.778652	0.838318	No
OMG	P23515	Oligodendrocyte-myelin glycoprotein	0.400923	0.268688	0.395638	No
OPA1	O60313	Dynamin-like 120 kDa protein, mitochondrial;Dynamin-like 120 kDa protein, form S1	0.315549	0.125471	0.242738	No
OPA3	Q9H6K4	Optic atrophy 3 protein	-1.14562	0.444391	0.559942	No
OPCML	Q14982	Opioid-binding protein/cell adhesion molecule	-0.37611	0.107513	0.219121	No
OPTN	Q96CV9	Optineurin	0.667833	0.0128099	0.0607865	No
OSBP	P22059	Oxysterol-binding protein 1	-1.04309	0.429526	0.547604	No
OSBPL1A	Q9BXW6	Oxysterol-binding protein-related protein 1	-3.74805	0.0292203	0.0969511	No
OSBPL2	Q9H1P3	Oxysterol-binding protein-related protein 2	-1.46855	0.262988	0.390113	No
OSBPL3	Q9H4L5	Oxysterol-binding protein-related protein 3	-3.07819	0.0228256	0.0831978	No
OSBPL6	Q9BZF3	Oxysterol-binding protein-related protein 6	0.702042	0.0314634	0.101953	No
OSBPL8	Q9BZF1	Oxysterol-binding protein-related protein 8	-0.107573	0.715594	0.787931	No
OTUB1	Q96FW1	Ubiquitin thioesterase OTUB1	-0.133161	0.666856	0.753222	No
OXCT1	P55809	Succinyl-CoA:3-ketoacid coenzyme A transferase 1, mitochondrial	-0.485814	0.0742946	0.17285	No
OXSR1	O95747	Serine/threonine-protein kinase OSR1	0.221052	0.244778	0.371145	No
P0DP25	P0DP25		-0.826717	0.146573	0.267512	No
P0DPI2	P0DPI2		0.992543	0.459904	0.57431	No
P4HB	P07237	Protein disulfide-isomerase	-0.760459	0.0567449	0.146373	No
PA2G4	Q9UQ80	Proliferation-associated protein 2G4	0.857784	0.0101009	0.0537079	No
PABPC4	Q13310	Polyadenylate-binding protein 4	-1.09067	0.325933	0.454391	No
PACS1	Q6VY07	Phosphofurin acidic cluster sorting protein 1	0.428837	0.04745	0.130138	No
PACSIN1	Q9BY11	Protein kinase C and casein kinase substrate in neurons protein 1	-1.46761	0.0420475	0.121551	No
PACSIN2	Q9UNF0	Protein kinase C and casein kinase substrate in neurons protein 2	-1.04021	0.00411298	0.0340716	No
PAFAH1B1	P43034	Platelet-activating factor acetylhydrolase IB subunit alpha	-0.456247	0.192984	0.317772	No
PAFAH1B2	P68402	Platelet-activating factor acetylhydrolase IB subunit beta	-0.834301	0.0402994	0.118403	No
PAK1	Q13153	Serine/threonine-protein kinase PAK 1	-1.75945	0.0510331	0.137124	No
PAK2	Q13177	Serine/threonine-protein kinase PAK 2;PAK-2p27;PAK-2p34	-1.39973	0.0367497	0.112303	No
PAK3	O75914	Serine/threonine-protein kinase PAK 3	-1.74936	0.0195293	0.0748723	No
PALM	O75781	Paralemmin-1	0.172493	0.532904	0.639739	No
PAM16	Q9Y3D7	Mitochondrial import inner membrane translocase subunit TIM16	-0.0921526	0.813692	0.866645	No
PANK4	Q9NVE7	Pantothenate kinase 4	0.21903	0.357696	0.483919	No
PARP1	P09874	Poly [ADP-ribose] polymerase 1	0.140918	0.49206	0.603673	No
PBDC1	Q9BVG4	Protein PBDC1	0.272997	0.502473	0.611379	No
PBXIP1	Q96AQ6	Pre-B-cell leukemia transcription factor-interacting protein 1	-4.26443	0.0163191	0.0685183	No
PC	P11498	Pyruvate carboxylase, mitochondrial	-0.212685	0.255399	0.382111	No
PCBP1	Q15365	Poly(rC)-binding protein 1	-0.264074	0.207937	0.332924	No
PCBP2	Q15366	Poly(rC)-binding protein 2	-0.148417	0.615344	0.709578	No
PCCA	P05165	Propionyl-CoA carboxylase alpha chain, mitochondrial	-0.462118	0.11995	0.235868	No
PCCB	P05166	Propionyl-CoA carboxylase beta chain, mitochondrial	-1.10519	0.00887233	0.0500312	No
PCDH1	Q08174	Protocadherin-1	-0.0114921	0.964394	0.975232	No
PCDH7	O60245	Protocadherin-7	0.265688	0.201016	0.325745	No
PCDH9	Q9HC56	Protocadherin-9	0.236238	0.368926	0.492751	No
PCLO	Q9Y6V0	Protein piccolo	0.0101608	0.975165	0.981408	No
PCSK1N	Q9UHG2	ProSAAS;KEP;Big SAAS;Little SAAS;Big PEN-LEN;PEN;Little LEN;Big LEN	-0.037103	0.961038	0.973424	No
PCYOX1	Q9UHG3	Prenylcysteine oxidase 1	-0.269202	0.19319	0.317772	No
PCYOX1L	Q8NBM8	Prenylcysteine oxidase-like	0.220786	0.425778	0.544675	No
PCYT2	Q99447	Ethanolamine-phosphate cytidylyltransferase	-3.39627	0.0279301	0.093659	No
PDAP1	Q13442	28 kDa heat- and acid-stable phosphoprotein	0.0767512	0.8228	0.872163	No
PDCD10	Q9BUL8	Programmed cell death protein 10	-0.515212	0.260199	0.387908	No
PDCD6	O75340	Programmed cell death protein 6	-2.28047	0.0609486	0.153378	No
PDCD6IP	Q8WUM4	Programmed cell death 6-interacting protein	-0.00209328	0.994	0.995187	No
PDE12	Q6L8Q7	2,5-phosphodiesterase 12	0.257521	0.377622	0.499219	No
PDE1A	P54750	Calcium/calmodulin-dependent 3,5-cyclic nucleotide phosphodiesterase 1A	-0.681626	0.120897	0.237358	No
PDE1B	Q01064	Calcium/calmodulin-dependent 3,5-cyclic nucleotide phosphodiesterase 1B	-0.0298776	0.903265	0.933324	No
PDE1C	Q14123	Calcium/calmodulin-dependent 3,5-cyclic nucleotide phosphodiesterase 1C	-1.06042	0.427751	0.546366	No
PDE2A	O00408	cGMP-dependent 3,5-cyclic phosphodiesterase	0.0615569	0.833738	0.88029	No
PDHB	P11177	Pyruvate dehydrogenase E1 component subunit beta, mitochondrial	-0.741932	0.0442235	0.12424	No
PDHX	O00330	Pyruvate dehydrogenase protein X component, mitochondrial	-0.821477	0.0353138	0.109488	No
PDIA3	P30101	Protein disulfide-isomerase A3	0.487042	0.169176	0.291432	No
PDIA4	P13667	Protein disulfide-isomerase A4	-0.185982	0.739569	0.807649	No
PDIA6	Q15084	Protein disulfide-isomerase A6	-0.318083	0.297029	0.424207	No
PDK1	Q15118	[Pyruvate dehydrogenase (acetyl-transferring)] kinase isozyme 1, mitochondrial	0.555523	0.0554237	0.143999	No
PDK2	Q15119	[Pyruvate dehydrogenase (acetyl-transferring)] kinase isozyme 2, mitochondrial	-1.85068	0.058917	0.1505	No
PDK3	Q15120	[Pyruvate dehydrogenase (acetyl-transferring)] kinase isozyme 3, mitochondrial	-0.426506	0.217406	0.343532	No
PDP1	Q9P0J1	[Pyruvate dehydrogenase [acetyl-transferring]]-phosphatase 1, mitochondrial	-2.64475	0.0514243	0.137441	No
PDPK2P	Q6A1A2	Putative 3-phosphoinositide-dependent protein kinase 2;3-phosphoinositide-dependent protein kinase 1	0.789285	0.0185661	0.0729101	No
PDXK	O00764	Pyridoxal kinase	1.11684	0.00582178	0.0395794	No
PDXP	Q96GD0	Pyridoxal phosphate phosphatase	-2.25581	0.111063	0.223638	No
PEA15	Q15121	Astrocytic phosphoprotein PEA-15	0.223618	0.362961	0.488154	No
PEF1	Q9UBV8	Peflin	-2.23338	0.0469305	0.129488	No
PELO	Q9BRX2	Protein pelota homolog	-1.28509	0.316316	0.443937	No
PEPD	P12955	Xaa-Pro dipeptidase	-2.59964	0.020021	0.0758325	No
PEX11B	O96011	Peroxisomal membrane protein 11B	-0.842413	0.374543	0.49687	No
PEX14	O75381	Peroxisomal membrane protein PEX14	0.253378	0.434518	0.551648	No
PEX19	P40855	Peroxisomal biogenesis factor 19	0.00798212	0.973121	0.979744	No
PEX5L	Q8IYB4	PEX5-related protein	0.015777	0.94209	0.961354	No
PFDN1	O60925	Prefoldin subunit 1	-0.228172	0.510013	0.617807	No
PFDN2	Q9UHV9	Prefoldin subunit 2	-0.286615	0.463908	0.577017	No
PFDN4	Q9NQP4	Prefoldin subunit 4	-2.04743	0.119675	0.235696	No
PFDN5	Q99471	Prefoldin subunit 5	-0.384507	0.138521	0.256462	No
PFDN6	O15212	Prefoldin subunit 6	0.277585	0.558716	0.660015	No
PFKFB2	O60825	6-phosphofructo-2-kinase/fructose-2,6-bisphosphatase 2;6-phosphofructo-2-kinase;Fructose-2,6-bisphosphatase	-1.80069	0.11305	0.225865	No
PFKL	P17858	ATP-dependent 6-phosphofructokinase, liver type	0.136988	0.500882	0.610033	No
PFKM	P08237	ATP-dependent 6-phosphofructokinase, muscle type	-0.35101	0.178365	0.300413	No
PFKP	Q01813	ATP-dependent 6-phosphofructokinase, platelet type	0.355641	0.332522	0.460767	No
PFN1	P07737	Profilin-1	-0.425367	0.354482	0.481644	No
PFN2	P35080	Profilin-2	-0.250323	0.474302	0.587208	No
PGAM1	P18669	Phosphoglycerate mutase 1	1.3064	0.00523034	0.0381285	No
PGD	P52209	6-phosphogluconate dehydrogenase, decarboxylating	-0.493939	0.0765512	0.175663	No
PGK1	P00558	Phosphoglycerate kinase 1	-0.986808	0.0055311	0.0386506	No
PGLS	O95336	6-phosphogluconolactonase	-0.470319	0.18842	0.312378	No
PGM1	P36871	Phosphoglucomutase-1	-1.37614	0.000248459	0.00548136	No
PGM2L1	Q6PCE3	Glucose 1,6-bisphosphate synthase	-0.382382	0.208833	0.334106	No
PGM3	O95394	Phosphoacetylglucosamine mutase	-4.30303	0.0193889	0.0746756	No
PGRMC1	O00264	Membrane-associated progesterone receptor component 1	1.10351	0.0344712	0.10783	No
PGRMC2	O15173	Membrane-associated progesterone receptor component 2	0.248543	0.188813	0.312823	No
PHACTR1	Q9C0D0	Phosphatase and actin regulator 1	0.787484	0.0676851	0.162162	No
PHB	P35232	Prohibitin	0.747577	0.00446878	0.0346882	No
PHB2	Q99623	Prohibitin-2	0.335576	0.133534	0.251563	No
PHGDH	O43175	D-3-phosphoglycerate dehydrogenase	0.0823872	0.822919	0.872163	No
PHYHIP	Q92561	Phytanoyl-CoA hydroxylase-interacting protein	1.33505	0.028527	0.0949012	No
PHYHIPL	Q96FC7	Phytanoyl-CoA hydroxylase-interacting protein-like	0.203012	0.755267	0.819455	No
PI4KA	P42356	Phosphatidylinositol 4-kinase alpha	-0.450085	0.125902	0.243384	No
PICALM	Q13492	Phosphatidylinositol-binding clathrin assembly protein	-0.456071	0.194716	0.319655	No
PICK1	Q9NRD5	PRKCA-binding protein	-1.41121	0.347399	0.475008	No
PIK3C3	Q8NEB9	Phosphatidylinositol 3-kinase catalytic subunit type 3	-2.62798	0.0479245	0.131093	No
PIK3R1	P27986	Phosphatidylinositol 3-kinase regulatory subunit alpha	0.565283	0.050858	0.1368	No
PIK3R4	Q99570	Phosphoinositide 3-kinase regulatory subunit 4	-0.0664102	0.785494	0.844599	No
PIN1	Q13526	Peptidyl-prolyl cis-trans isomerase NIMA-interacting 1	1.19373	0.0085229	0.04865	No
PIP4K2A	P48426	Phosphatidylinositol 5-phosphate 4-kinase type-2 alpha	-0.3109	0.273875	0.401162	No
PIP4K2B	P78356	Phosphatidylinositol 5-phosphate 4-kinase type-2 beta	0.974623	0.00118641	0.015622	No
PIP4K2C	Q8TBX8	Phosphatidylinositol 5-phosphate 4-kinase type-2 gamma	0.00314633	0.990794	0.993054	No
PIP5K1C	O60331	Phosphatidylinositol 4-phosphate 5-kinase type-1 gamma	0.605285	0.162142	0.283776	No
PITHD1	Q9GZP4	PITH domain-containing protein 1	-0.564284	0.101362	0.211031	No
PITPNA	Q00169	Phosphatidylinositol transfer protein alpha isoform	-1.23688	0.0199749	0.0757719	No
PITPNB	P48739	Phosphatidylinositol transfer protein beta isoform	-0.0934859	0.733559	0.80248	No
PITPNM1	O00562	Membrane-associated phosphatidylinositol transfer protein 1	-1.02016	0.241904	0.369168	No
PKP4	Q99569	Plakophilin-4	0.601434	0.0407162	0.11921	No
PLAA	Q9Y263	Phospholipase A-2-activating protein	0.182364	0.494576	0.605283	No
PLCB1	Q9NQ66	1-phosphatidylinositol 4,5-bisphosphate phosphodiesterase beta-1	-2.56292	0.023198	0.0838262	No
PLCD1	P51178	1-phosphatidylinositol 4,5-bisphosphate phosphodiesterase delta-1	-2.38983	0.0653161	0.159183	No
PLCG1	P19174	1-phosphatidylinositol 4,5-bisphosphate phosphodiesterase gamma-1	-3.29461	0.0457264	0.127215	No
PLCL1	Q15111	Inactive phospholipase C-like protein 1	0.342386	0.28037	0.406884	No
PLCL2	Q9UPR0	Inactive phospholipase C-like protein 2	0.109927	0.676203	0.75888	No
PLCXD3	Q63HM9	PI-PLC X domain-containing protein 3	-2.5432	0.0330898	0.10468	No
PLD3	Q8IV08	Phospholipase D3	0.113761	0.643737	0.733242	No
PLEC	Q15149	Plectin	0.21422	0.217457	0.343532	No
PLEKHA1	Q9HB21	Pleckstrin homology domain-containing family A member 1	0.259095	0.359814	0.485167	No
PLIN3	O60664	Perilipin-3	-0.632836	0.238806	0.365772	No
PLLP	Q9Y342	Plasmolipin	1.65906	0.236293	0.363472	No
PLP1	P60201	Myelin proteolipid protein	-1.95387	0.0167386	0.0689647	No
PLS3	P13797	Plastin-3	-0.811509	0.153508	0.273803	No
PLXNA1	Q9UIW2	Plexin-A1	0.336477	0.473512	0.586931	No
PLXNA4	Q9HCM2	Plexin-A4	0.457806	0.109026	0.221129	No
PLXNB1	O43157	Plexin-B1	-0.209422	0.478028	0.589912	No
PLXND1	Q9Y4D7	Plexin-D1	0.818144	0.024293	0.085931	No
PMM1	Q92871	Phosphomannomutase 1	-0.579112	0.585925	0.683489	No
PMPCA	Q10713	Mitochondrial-processing peptidase subunit alpha	-1.58156	0.173714	0.295603	No
PMPCB	O75439	Mitochondrial-processing peptidase subunit beta	-1.00489	0.0179369	0.0716323	No
PMVK	Q15126	Phosphomevalonate kinase	0.412341	0.201298	0.325992	No
PNMAL2	Q9ULN7	PNMA-like protein 2	-1.55166	0.0530711	0.139763	No
PNN	Q9H307	Pinin	2.01898	0.0676054	0.162162	No
PNPLA6	Q8IY17	Neuropathy target esterase	-0.0347633	0.877674	0.915154	No
PNPT1	Q8TCS8	Polyribonucleotide nucleotidyltransferase 1, mitochondrial	0.754879	0.0252329	0.0876617	No
POLDIP2	Q9Y2S7	Polymerase delta-interacting protein 2	-3.08075	0.0141107	0.0631465	No
POR	P16435	NADPH--cytochrome P450 reductase	0.186801	0.543083	0.647839	No
PPA1	Q15181	Inorganic pyrophosphatase	-3.02028	0.0240727	0.085392	No
PPAP2B	O14495	Lipid phosphate phosphohydrolase 3	-2.84168	0.027392	0.0927877	No
PPFIA2	O75334	Liprin-alpha-2	1.3403	0.00355466	0.031526	No
PPFIA3	O75145	Liprin-alpha-3	0.81167	0.00211095	0.0227855	No
PPFIA4	O75335	Liprin-alpha-4	-1.76761	0.237157	0.364355	No
PPIB	P23284	Peptidyl-prolyl cis-trans isomerase B	-0.0401837	0.962965	0.974198	No
PPID	Q08752	Peptidyl-prolyl cis-trans isomerase D	0.045267	0.935909	0.957223	No
PPM1F	P49593	Protein phosphatase 1F	-1.38508	0.299759	0.42641	No
PPM1H	Q9ULR3	Protein phosphatase 1H	-2.2683	0.0660344	0.160616	No
PPME1	Q9Y570	Protein phosphatase methylesterase 1	-0.54029	0.131437	0.249996	No
PPP1CA	P62136	Serine/threonine-protein phosphatase PP1-alpha catalytic subunit	0.453505	0.693862	0.770448	No
PPP1CB	P62140	Serine/threonine-protein phosphatase PP1-beta catalytic subunit	0.782715	0.0292738	0.0970006	No
PPP1CC	P36873	Serine/threonine-protein phosphatase PP1-gamma catalytic subunit	-2.44838	0.127653	0.246202	No
PPP1R12A	O14974	Protein phosphatase 1 regulatory subunit 12A	0.267503	0.523632	0.630261	No
PPP1R14A	Q96A00	Protein phosphatase 1 regulatory subunit 14A	-2.64327	0.0211429	0.079011	No
PPP1R21	Q6ZMI0	Protein phosphatase 1 regulatory subunit 21	-0.231751	0.600784	0.697909	No
PPP1R9A	Q9ULJ8	Neurabin-1	0.18248	0.496008	0.606447	No
PPP1R9B	Q96SB3	Neurabin-2	0.590017	0.170039	0.291512	No
PPP2R1A	P30153	Serine/threonine-protein phosphatase 2A 65 kDa regulatory subunit A alpha isoform	0.241381	0.373656	0.496432	No
PPP2R2A	P63151	Serine/threonine-protein phosphatase 2A 55 kDa regulatory subunit B alpha isoform	-0.233741	0.440736	0.557852	No
PPP2R4	Q15257	Serine/threonine-protein phosphatase 2A activator	-0.460936	0.212199	0.337773	No
PPP2R5B	Q15173	Serine/threonine-protein phosphatase 2A 56 kDa regulatory subunit beta isoform	-1.58451	0.224429	0.350142	No
PPP2R5D	Q14738	Serine/threonine-protein phosphatase 2A 56 kDa regulatory subunit delta isoform	0.408285	0.078927	0.179477	No
PPP2R5E	Q16537	Serine/threonine-protein phosphatase 2A 56 kDa regulatory subunit epsilon isoform	-0.0428594	0.892474	0.924834	No
PPP3CB	P16298	Serine/threonine-protein phosphatase 2B catalytic subunit beta isoform	-1.92131	0.0240147	0.085392	No
PPP3CC	P48454	Serine/threonine-protein phosphatase 2B catalytic subunit gamma isoform	-3.374	0.0138409	0.062994	No
PPP5C	P53041	Serine/threonine-protein phosphatase 5	-2.57322	0.0552488	0.143841	No
PPP6R2	O75170	Serine/threonine-protein phosphatase 6 regulatory subunit 2	0.52691	0.0849708	0.187787	No
PPT1	P50897	Palmitoyl-protein thioesterase 1	-0.41363	0.338064	0.466646	No
PRAF2	O60831	PRA1 family protein 2	0.142849	0.529788	0.636325	No
PRDX1	Q06830	Peroxiredoxin-1	-0.358022	0.368046	0.492751	No
PRDX2	P32119	Peroxiredoxin-2	-0.692383	0.138989	0.256937	No
PRDX3	P30048	Thioredoxin-dependent peroxide reductase, mitochondrial	-0.202083	0.652756	0.742506	No
PRDX5	P30044	Peroxiredoxin-5, mitochondrial	-1.41358	0.00595834	0.0401412	No
PREP	P48147	Prolyl endopeptidase	-0.111855	0.776043	0.836583	No
PRKAA1	Q13131	5-AMP-activated protein kinase catalytic subunit alpha-1	1.00778	0.000957102	0.0139139	No
PRKAA2	P54646	5-AMP-activated protein kinase catalytic subunit alpha-2	0.43758	0.205441	0.330572	No
PRKACA	P17612	cAMP-dependent protein kinase catalytic subunit alpha	-1.15421	0.0164035	0.0687581	No
PRKACB	P22694	cAMP-dependent protein kinase catalytic subunit beta	-0.0106648	0.977657	0.98313	No
PRKAG1	P54619	5-AMP-activated protein kinase subunit gamma-1	1.35674	0.263229	0.390113	No
PRKAR1A	P10644	cAMP-dependent protein kinase type I-alpha regulatory subunit;cAMP-dependent protein kinase type I-alpha regulatory subunit, N-terminally processed	0.348932	0.243775	0.370616	No
PRKAR1B	P31321	cAMP-dependent protein kinase type I-beta regulatory subunit	0.455999	0.159504	0.280723	No
PRKAR2A	P13861	cAMP-dependent protein kinase type II-alpha regulatory subunit	0.521176	0.024838	0.0871506	No
PRKAR2B	P31323	cAMP-dependent protein kinase type II-beta regulatory subunit	0.511095	0.153613	0.273803	No
PRKCA	P17252	Protein kinase C alpha type	0.834502	0.00324109	0.0296412	No
PRKCB	P05771	Protein kinase C beta type	0.921947	0.00438484	0.0346882	No
PRKCD	Q05655	Protein kinase C delta type;Protein kinase C delta type regulatory subunit;Protein kinase C delta type catalytic subunit	1.1096	0.00491184	0.0368755	No
PRKCE	Q02156	Protein kinase C epsilon type	0.136013	0.677174	0.759292	No
PRKCG	P05129	Protein kinase C gamma type	-0.259762	0.603079	0.699143	No
PRKCSH	P14314	Glucosidase 2 subunit beta	-0.270158	0.363603	0.488755	No
PRKDC	P78527	DNA-dependent protein kinase catalytic subunit	0.430403	0.0511985	0.13729	No
PRKRA	O75569	Interferon-inducible double-stranded RNA-dependent protein kinase activator A	-1.02899	0.317944	0.445476	No
PRMT1	Q99873	Protein arginine N-methyltransferase 1	-1.90234	0.178988	0.300705	No
PRODH	O43272	Proline dehydrogenase 1, mitochondrial	-3.89939	0.0171318	0.0697504	No
PROSC	O94903	Proline synthase co-transcribed bacterial homolog protein	1.35071	0.0235385	0.0845705	No
PRPF19	Q9UMS4	Pre-mRNA-processing factor 19	-0.111366	0.735726	0.80415	No
PRPF8	Q6P2Q9	Pre-mRNA-processing-splicing factor 8	1.2487	0.199031	0.32378	No
PRPH	P41219	Peripherin	0.157432	0.827444	0.875545	No
PRPSAP1	Q14558	Phosphoribosyl pyrophosphate synthase-associated protein 1	-3.0427	0.0247758	0.0871483	No
PRPSAP2	O60256	Phosphoribosyl pyrophosphate synthase-associated protein 2	-1.79762	0.177115	0.298755	No
PRR36	Q9H6K5	Proline-rich protein 36	0.261576	0.508591	0.616734	No
PRRT2	Q7Z6L0	Proline-rich transmembrane protein 2	-0.873517	0.0738368	0.172423	No
PRRT3	Q5FWE3	Proline-rich transmembrane protein 3	-1.09775	0.407438	0.527655	No
PRUNE	Q86TP1	Protein prune homolog	0.254846	0.163437	0.285448	No
PSAP	P07602	Prosaposin;Saposin-A;Saposin-B-Val;Saposin-B;Saposin-C;Saposin-D	-2.03836	0.169652	0.291445	No
PSAT1	Q9Y617	Phosphoserine aminotransferase	-0.467983	0.159037	0.28049	No
PSD	A5PKW4	PH and SEC7 domain-containing protein 1	1.20764	0.0393331	0.116654	No
PSIP1	O75475	PC4 and SFRS1-interacting protein	0.66812	0.0492565	0.133978	No
PSMA1	P25786	Proteasome subunit alpha type-1	-2.56513	0.0894695	0.193928	No
PSMA2	P25787	Proteasome subunit alpha type-2	-0.970232	0.0178259	0.071617	No
PSMA3	P25788	Proteasome subunit alpha type-3	-0.956077	0.0189826	0.0737737	No
PSMA4	P25789	Proteasome subunit alpha type-4	-1.90041	0.149936	0.271018	No
PSMA5	P28066	Proteasome subunit alpha type-5	-0.53346	0.158548	0.279822	No
PSMA6	P60900	Proteasome subunit alpha type-6	-2.80036	0.0790032	0.179488	No
PSMA7	O14818	Proteasome subunit alpha type-7	-1.39187	0.00241213	0.0247613	No
PSMB2	P49721	Proteasome subunit beta type-2	-1.15196	0.330763	0.459088	No
PSMB3	P49720	Proteasome subunit beta type-3	-1.51042	0.0139366	0.062994	No
PSMB4	P28070	Proteasome subunit beta type-4	-3.4777	0.0435137	0.123518	No
PSMB5	P28074	Proteasome subunit beta type-5	-0.788387	0.242872	0.369898	No
PSMB6	P28072	Proteasome subunit beta type-6	-2.39704	0.130918	0.249817	No
PSMC1	P62191	26S protease regulatory subunit 4	0.248643	0.221339	0.348322	No
PSMC2	P35998	26S protease regulatory subunit 7	0.5476	0.00800357	0.0463189	No
PSMC3	P17980	26S protease regulatory subunit 6A	0.832566	0.00778604	0.0457521	No
PSMC4	P43686	26S protease regulatory subunit 6B	0.809432	0.00539604	0.038433	No
PSMC5	P62195	26S protease regulatory subunit 8	0.550258	0.0517711	0.137913	No
PSMC6	P62333	26S protease regulatory subunit 10B	0.932299	0.00202744	0.0220737	No
PSMD1	Q99460	26S proteasome non-ATPase regulatory subunit 1	-0.636397	0.207933	0.332924	No
PSMD11	O00231	26S proteasome non-ATPase regulatory subunit 11	0.698708	0.00720044	0.0437418	No
PSMD12	O00232	26S proteasome non-ATPase regulatory subunit 12	0.080469	0.685161	0.763821	No
PSMD13	Q9UNM6	26S proteasome non-ATPase regulatory subunit 13	-0.46707	0.0841305	0.186586	No
PSMD14	O00487	26S proteasome non-ATPase regulatory subunit 14	-2.74729	0.0690894	0.163663	No
PSMD2	Q13200	26S proteasome non-ATPase regulatory subunit 2	-0.42122	0.102908	0.212665	No
PSMD3	O43242	26S proteasome non-ATPase regulatory subunit 3	-0.104071	0.747604	0.813949	No
PSMD4	P55036	26S proteasome non-ATPase regulatory subunit 4	-0.464812	0.0664981	0.160893	No
PSMD5	Q16401	26S proteasome non-ATPase regulatory subunit 5	0.270242	0.259011	0.386595	No
PSMD6	Q15008	26S proteasome non-ATPase regulatory subunit 6	-0.389438	0.379465	0.500787	No
PSMD8	P48556	26S proteasome non-ATPase regulatory subunit 8	-0.605894	0.0107442	0.0548108	No
PSME2	Q9UL46	Proteasome activator complex subunit 2	-3.38143	0.0179746	0.0716323	No
PSPC1	Q8WXF1	Paraspeckle component 1	0.769651	0.0144844	0.0637972	No
PTBP2	Q9UKA9	Polypyrimidine tract-binding protein 2	0.0442849	0.840631	0.884597	No
PTEN	P60484	Phosphatidylinositol 3,4,5-trisphosphate 3-phosphatase and dual-specificity protein phosphatase PTEN	0.433391	0.0818926	0.183076	No
PTGES2	Q9H7Z7	Prostaglandin E synthase 2;Prostaglandin E synthase 2 truncated form	-0.89579	0.0180567	0.0716323	No
PTGES3	Q15185	Prostaglandin E synthase 3	-0.0756058	0.820831	0.871418	No
PTGR1	Q14914	Prostaglandin reductase 1	-1.59458	0.197765	0.322973	No
PTK2	Q05397	Focal adhesion kinase 1	-0.0972445	0.653363	0.742525	No
PTK2B	Q14289	Protein-tyrosine kinase 2-beta	-0.105182	0.576131	0.67551	No
PTMA	P06454	Prothymosin alpha;Prothymosin alpha, N-terminally processed;Thymosin alpha-1	-2.73626	0.0868238	0.190711	No
PTPN11	Q06124	Tyrosine-protein phosphatase non-receptor type 11	-1.57259	0.0167819	0.0689647	No
PTPN23	Q9H3S7	Tyrosine-protein phosphatase non-receptor type 23	0.156081	0.506273	0.614812	No
PTPN9	P43378	Tyrosine-protein phosphatase non-receptor type 9	-2.99452	0.0228089	0.0831978	No
PTPRA	P18433	Receptor-type tyrosine-protein phosphatase alpha	0.154416	0.58224	0.680452	No
PTPRD	P23468	Receptor-type tyrosine-protein phosphatase delta	0.244961	0.243095	0.369898	No
PTPRE	P23469	Receptor-type tyrosine-protein phosphatase epsilon	0.162867	0.694818	0.771168	No
PTPRF	P10586	Receptor-type tyrosine-protein phosphatase F	0.552129	0.0994989	0.20836	No
PTPRS	Q13332	Receptor-type tyrosine-protein phosphatase S	0.551525	0.0713158	0.167746	No
PTPRZ1	P23471	Receptor-type tyrosine-protein phosphatase zeta	0.015507	0.955023	0.970066	No
PTRF	Q6NZI2	Polymerase I and transcript release factor	1.08497	0.0119939	0.0588005	No
PTRHD1	Q6GMV3	Putative peptidyl-tRNA hydrolase PTRHD1	2.38178	0.157725	0.278762	No
PUF60	Q9UHX1	Poly(U)-binding-splicing factor PUF60	0.475924	0.147541	0.268111	No
PURA	Q00577	Transcriptional activator protein Pur-alpha	0.00666952	0.968606	0.977154	No
PURB	Q96QR8	Transcriptional activator protein Pur-beta	0.510318	0.369345	0.493017	No
PVRL1	Q15223	Nectin-1	-0.324795	0.543225	0.647839	No
PYGB	P11216	Glycogen phosphorylase, brain form	-0.290789	0.198855	0.32378	No
PYGM	P11217	Glycogen phosphorylase, muscle form	-1.42043	0.0150354	0.0651968	No
QARS	P47897	Glutamine--tRNA ligase	-0.135029	0.605007	0.700549	No
QIL1	Q5XKP0	Protein QIL1	-0.0578733	0.817713	0.869209	No
QKI	Q96PU8	Protein quaking	0.0413763	0.917559	0.944602	No
RAB10	P61026	Ras-related protein Rab-10	-0.748251	0.0112566	0.0565079	No
RAB11B	Q15907	Ras-related protein Rab-11B;Ras-related protein Rab-11A	0.200224	0.254377	0.380915	No
RAB11FIP5	Q9BXF6	Rab11 family-interacting protein 5	0.677686	0.00427199	0.0346882	No
RAB12	Q6IQ22	Ras-related protein Rab-12	0.0593807	0.826023	0.874714	No
RAB14	P61106	Ras-related protein Rab-14	0.161749	0.339489	0.467843	No
RAB18	Q9NP72	Ras-related protein Rab-18	0.413641	0.0951869	0.201342	No
RAB1A	P62820	Ras-related protein Rab-1A	-0.0121468	0.944511	0.962889	No
RAB1B	Q9H0U4	Ras-related protein Rab-1B;Putative Ras-related protein Rab-1C	0.719388	0.0250237	0.0874602	No
RAB21	Q9UL25	Ras-related protein Rab-21	-1.68128	0.272601	0.399995	No
RAB23	Q9ULC3	Ras-related protein Rab-23	0.352233	0.167697	0.290067	No
RAB27B	O00194	Ras-related protein Rab-27B	-0.19159	0.458253	0.572816	No
RAB2A	P61019	Ras-related protein Rab-2A	0.362634	0.0895231	0.193928	No
RAB31	Q13636	Ras-related protein Rab-31	-1.97857	0.0737091	0.172285	No
RAB35	Q15286	Ras-related protein Rab-35	-0.458909	0.0601287	0.153089	No
RAB39A	Q14964	Ras-related protein Rab-39A	3.93475	0.012712	0.0606136	No
RAB39B	Q96DA2	Ras-related protein Rab-39B	1.80799	0.156935	0.277952	No
RAB3A	P20336	Ras-related protein Rab-3A	0.35494	0.25984	0.387602	No
RAB3B	P20337	Ras-related protein Rab-3B	0.80022	0.17935	0.300971	No
RAB3C	Q96E17	Ras-related protein Rab-3C	-0.0713041	0.814214	0.866645	No
RAB3D	O95716	Ras-related protein Rab-3D	1.41637	0.010447	0.054084	No
RAB3GAP1	Q15042	Rab3 GTPase-activating protein catalytic subunit	0.18887	0.539207	0.64515	No
RAB3GAP2	Q9H2M9	Rab3 GTPase-activating protein non-catalytic subunit	0.268503	0.402677	0.5236	No
RAB4A	P20338	Ras-related protein Rab-4A	-0.414076	0.10227	0.212186	No
RAB4B	P61018	Ras-related protein Rab-4B	0.0670035	0.720025	0.791115	No
RAB5A	P20339	Ras-related protein Rab-5A	-0.154662	0.489611	0.601549	No
RAB5B	P61020	Ras-related protein Rab-5B	-0.438766	0.0524595	0.13888	No
RAB5C	P51148	Ras-related protein Rab-5C	-0.0159457	0.945229	0.963229	No
RAB6A	P20340	Ras-related protein Rab-6A	-0.340009	0.131752	0.249996	No
RAB6B	Q9NRW1	Ras-related protein Rab-6B	-0.626944	0.0332847	0.105033	No
RAB7A	P51149	Ras-related protein Rab-7a	0.0479319	0.830495	0.878341	No
RABEP1	Q15276	Rab GTPase-binding effector protein 1	0.755135	0.0180576	0.0716323	No
RABGAP1	Q9Y3P9	Rab GTPase-activating protein 1	-0.114576	0.638216	0.728718	No
RABGEF1	Q9UJ41	Rab5 GDP/GTP exchange factor	-1.36859	0.215231	0.341088	No
RABGGTA	Q92696	Geranylgeranyl transferase type-2 subunit alpha	-1.91353	0.19558	0.320663	No
RABIF	P47224	Guanine nucleotide exchange factor MSS4	2.38419	0.0566364	0.146243	No
RABL3	Q5HYI8	Rab-like protein 3	3.22946	0.0307759	0.100783	No
RAC1	P63000	Ras-related C3 botulinum toxin substrate 1	-2.55101	0.0359107	0.110545	No
RAD23B	P54727	UV excision repair protein RAD23 homolog B	-0.928171	0.0127252	0.0606136	No
RAE1	P78406	mRNA export factor	2.21264	0.102036	0.211908	No
RALA	P11233	Ras-related protein Ral-A	-0.606058	0.026382	0.0897845	No
RALB	P11234	Ras-related protein Ral-B	-3.4487	0.0305333	0.100119	No
RALBP1	Q15311	RalA-binding protein 1	-1.12919	0.314487	0.44211	No
RALGAPA1	Q6GYQ0	Ral GTPase-activating protein subunit alpha-1	0.338761	0.15976	0.280976	No
RALY	Q9UKM9	RNA-binding protein Raly	1.36187	0.00407097	0.0340149	No
RAN	P62826	GTP-binding nuclear protein Ran	2.41239	0.12935	0.248191	No
RANBP1	P43487	Ran-specific GTPase-activating protein	1.62067	0.0101741	0.0538468	No
RANGAP1	P46060	Ran GTPase-activating protein 1	0.308324	0.0993317	0.208183	No
RAP1GAP	P47736	Rap1 GTPase-activating protein 1	0.010414	0.972168	0.979176	No
RAP1GAP2	Q684P5	Rap1 GTPase-activating protein 2	-0.284917	0.461344	0.575233	No
RAP1GDS1	P52306	Rap1 GTPase-GDP dissociation stimulator 1	-0.12462	0.746587	0.813195	No
RAP2A	P10114	Ras-related protein Rap-2a	-0.660679	0.0146569	0.0642199	No
RAP2B	P61225	Ras-related protein Rap-2b	0.607579	0.0800989	0.180996	No
RAPGEF2	Q9Y4G8	Rap guanine nucleotide exchange factor 2	0.22806	0.447813	0.562846	No
RAPGEF4	Q8WZA2	Rap guanine nucleotide exchange factor 4	0.203488	0.522844	0.630026	No
RARS	P54136	Arginine--tRNA ligase, cytoplasmic	0.0129045	0.968389	0.977154	No
RASA1	P20936	Ras GTPase-activating protein 1	-0.40742	0.190788	0.315136	No
RASAL1	O95294	RasGAP-activating-like protein 1	0.49775	0.027412	0.0927877	No
RASGRF2	O14827	Ras-specific guanine nucleotide-releasing factor 2	-0.00187761	0.99618	0.996973	No
RBM14	Q96PK6	RNA-binding protein 14	0.907941	0.00684357	0.0427373	No
RBM39	Q14498	RNA-binding protein 39	-0.177623	0.889474	0.922866	No
RBM4	Q9BWF3	RNA-binding protein 4;RNA-binding protein 4B	2.50195	0.0779246	0.177585	No
RBP1	P09455	Retinol-binding protein 1	1.31792	0.000151345	0.00396492	No
RBX1	P62877	E3 ubiquitin-protein ligase RBX1;E3 ubiquitin-protein ligase RBX1, N-terminally processed	0.0773008	0.836795	0.882288	No
RCAN1	P53805	Calcipressin-1	0.373406	0.347802	0.475008	No
RCN1	Q15293	Reticulocalbin-1	0.705029	0.0563989	0.145779	No
RCN2	Q14257	Reticulocalbin-2	0.102839	0.619874	0.713167	No
RDH11	Q8TC12	Retinol dehydrogenase 11	-0.770287	0.168762	0.291109	No
RDH13	Q8NBN7	Retinol dehydrogenase 13	0.211494	0.347447	0.475008	No
RDH14	Q9HBH5	Retinol dehydrogenase 14	0.319533	0.213291	0.338974	No
RECQL	P46063	ATP-dependent DNA helicase Q1	-2.30514	0.0761433	0.175367	No
REEP2	Q9BRK0	Receptor expression-enhancing protein 2	-2.45839	0.121538	0.237872	No
REEP5	Q00765	Receptor expression-enhancing protein 5	0.649613	0.0233713	0.0842105	No
REPS1	Q96D71	RalBP1-associated Eps domain-containing protein 1	0.390934	0.179403	0.300971	No
REPS2	Q8NFH8	RalBP1-associated Eps domain-containing protein 2	-2.4039	0.0687331	0.163663	No
RFTN1	Q14699	Raftlin	-1.16367	0.407033	0.527482	No
RGS12	O14924	Regulator of G-protein signaling 12	1.6597	0.0502116	0.135812	No
RGS6	P49758	Regulator of G-protein signaling 6	0.976429	0.00717314	0.0436815	No
RGS7	P49802	Regulator of G-protein signaling 7	0.926719	0.0016614	0.0195253	No
RHEB	Q15382	GTP-binding protein Rheb	0.524783	0.0991397	0.208036	No
RHOA	P61586	Transforming protein RhoA	-4.01003	0.0186052	0.0729101	No
RHOB	P62745	Rho-related GTP-binding protein RhoB	-0.0361716	0.883176	0.918985	No
RHOG	P84095	Rho-related GTP-binding protein RhoG	-1.65993	0.0261773	0.089451	No
RHOT1	Q8IXI2	Mitochondrial Rho GTPase 1	0.617424	0.0258645	0.0885936	No
RHOT2	Q8IXI1	Mitochondrial Rho GTPase 2	-1.91665	0.038765	0.115428	No
RIC8A	Q9NPQ8	Synembryn-A	0.383311	0.461559	0.575233	No
RIMBP2	O15034	RIMS-binding protein 2	0.625782	0.060568	0.153089	No
RIMS1	Q86UR5	Regulating synaptic membrane exocytosis protein 1	0.416025	0.191272	0.315649	No
RIMS3	Q9UJD0	Regulating synaptic membrane exocytosis protein 3	-1.18663	0.249985	0.376024	No
RMDN3	Q96TC7	Regulator of microtubule dynamics protein 3	0.722575	0.0438091	0.1236	No
RMND1	Q9NWS8	Required for meiotic nuclear division protein 1 homolog	-1.59707	0.298951	0.425742	No
RNH1	P13489	Ribonuclease inhibitor	-0.802752	0.152005	0.272981	No
RNMT	O43148	mRNA cap guanine-N7 methyltransferase	-2.20658	0.0611361	0.153378	No
RNPEP	Q9H4A4	Aminopeptidase B	-2.58359	0.0933548	0.19985	No
ROCK2	O75116	Rho-associated protein kinase 2	-0.155915	0.681842	0.762487	No
ROGDI	Q9GZN7	Protein rogdi homolog	-3.33004	0.0234277	0.0842927	No
RP2	O75695	Protein XRP2	-0.624221	0.357317	0.483666	No
RPA1	P27694	Replication protein A 70 kDa DNA-binding subunit;Replication protein A 70 kDa DNA-binding subunit, N-terminally processed	-1.15614	0.381788	0.503511	No
RPH3A	Q9Y2J0	Rabphilin-3A	-0.407769	0.554066	0.657301	No
RPL10	P27635	60S ribosomal protein L10;60S ribosomal protein L10-like	0.340916	0.224564	0.350142	No
RPL10A	P62906	60S ribosomal protein L10a	0.226187	0.391396	0.512688	No
RPL11	P62913	60S ribosomal protein L11	0.824383	0.0190758	0.0738396	No
RPL12	P30050	60S ribosomal protein L12	0.125108	0.822522	0.872163	No
RPL13	P26373	60S ribosomal protein L13	0.808592	0.005441	0.0384385	No
RPL13A	P40429	60S ribosomal protein L13a	0.487398	0.0214306	0.0798366	No
RPL14	P50914	60S ribosomal protein L14	0.338372	0.305384	0.432455	No
RPL15	P61313	60S ribosomal protein L15	0.406987	0.162548	0.28429	No
RPL17	P18621	60S ribosomal protein L17	0.486823	0.0469948	0.129488	No
RPL18	Q07020	60S ribosomal protein L18	0.796113	0.0133334	0.0624459	No
RPL18A	Q02543	60S ribosomal protein L18a	0.694679	0.0123576	0.059883	No
RPL19	P84098	60S ribosomal protein L19	0.898089	0.037458	0.113502	No
RPL21	P46778	60S ribosomal protein L21	0.77495	0.0265569	0.0902575	No
RPL22	P35268	60S ribosomal protein L22	1.20751	0.00175542	0.0201912	No
RPL23	P62829	60S ribosomal protein L23	0.604319	0.182099	0.304112	No
RPL23A	P62750	60S ribosomal protein L23a	0.758505	0.0758279	0.1748	No
RPL24	P83731	60S ribosomal protein L24	0.798963	0.540837	0.646486	No
RPL26	P61254	60S ribosomal protein L26	1.4487	0.422443	0.542894	No
RPL27	P61353	60S ribosomal protein L27	0.111517	0.665568	0.752317	No
RPL27A	P46776	60S ribosomal protein L27a	1.3331	0.00507192	0.0375173	No
RPL28	P46779	60S ribosomal protein L28	0.357465	0.535768	0.641952	No
RPL29	P47914	60S ribosomal protein L29	0.161836	0.838855	0.883467	No
RPL3	P39023	60S ribosomal protein L3	0.443786	0.101347	0.211031	No
RPL30	P62888	60S ribosomal protein L30	0.473469	0.0884714	0.193267	No
RPL31	P62899	60S ribosomal protein L31	1.15281	0.00796701	0.0463189	No
RPL32	P62910	60S ribosomal protein L32	0.851122	0.0747989	0.173222	No
RPL34	P49207	60S ribosomal protein L34	1.06964	0.00470331	0.0357366	No
RPL35	P42766	60S ribosomal protein L35	0.843408	0.129202	0.248191	No
RPL35A	P18077	60S ribosomal protein L35a	0.481825	0.110388	0.222817	No
RPL37A	P61513	60S ribosomal protein L37a	-0.372396	0.815557	0.867651	No
RPL4	P36578	60S ribosomal protein L4	0.156372	0.603034	0.699143	No
RPL5	P46777	60S ribosomal protein L5	0.0210507	0.942242	0.961354	No
RPL6	Q02878	60S ribosomal protein L6	0.439928	0.0585893	0.15008	No
RPL7	P18124	60S ribosomal protein L7	0.776337	0.00501272	0.0372988	No
RPL7A	P62424	60S ribosomal protein L7a	0.583191	0.0145284	0.0638793	No
RPL8	P62917	60S ribosomal protein L8	0.779827	0.00376124	0.0323956	No
RPL9	P32969	60S ribosomal protein L9	0.306583	0.359419	0.484945	No
RPLP0	P05388	60S acidic ribosomal protein P0;60S acidic ribosomal protein P0-like	-0.457674	0.0214591	0.0798366	No
RPLP1	P05386	60S acidic ribosomal protein P1	0.155533	0.637008	0.728216	No
[truncated: 516 more rows]
