# Supplementary material for: Cortical Pathology in Vanishing White Matter
Source: Cells. 2022 Nov 12;11(22):3581. doi: 10.3390/cells11223581 (PMC9688115; doi:10.3390/cells11223581)
Supplement: Supplementary file 1 [file cells-11-03581-s001.zip › cells-1858119_Man et al. Table S3_final.xlsx]

## Sheet: Table S3
Protein name	ProteinID	Protein description	zscore_Ctrl1	zscore_Ctrl2	zscore_Ctrl3	zscore_Ctrl4	zcore_VWM1	zcore_VWM2	zcore_VWM3	zcore_VWM4	Cluster
AGAP2	Q99490	Arf-GAP with GTPase, ANK repeat and PH domain-containing protein 2	-0.515919	-0.874515	-0.824926	-1.15752	0.921091	0.313278	0.471134	1.66738	cluster1
HNRNPA2B1	P22626	Heterogeneous nuclear ribonucleoproteins A2/B1	-0.833647	-0.92802	-1.14727	-0.68606	0.794969	0.906005	1.40002	0.494001	cluster1
KIAA1217	Q5T5P2	Sickle tail protein homolog	-0.63935	-1.55041	-0.695365	-0.628451	0.561402	1.06929	0.744221	1.13866	cluster1
NONO	Q15233	Non-POU domain-containing octamer-binding protein	-1.33881	-0.815009	-1.14062	-0.168413	1.14254	1.02355	0.748623	0.54815	cluster1
PPIA	P62937	Peptidyl-prolyl cis-trans isomerase A;Peptidyl-prolyl cis-trans isomerase A, N-terminally processed	-0.885358	-0.677189	-1.24412	-0.429663	0.320869	1.60441	1.14978	0.161266	cluster1
SLC7A5	Q01650	Large neutral amino acids transporter small subunit 1	-0.88762	-1.41508	-0.777253	-0.154979	1.54953	0.182747	0.656129	0.846517	cluster1
PSD3	Q9NYI0	PH and SEC7 domain-containing protein 3	-0.260207	-0.783662	-1.44299	-0.94604	0.346221	0.85797	1.14083	1.08788	cluster1
CCDC177	Q9NQR7	Coiled-coil domain-containing protein 177	-0.670929	-0.545805	-0.577945	-1.61571	0.41577	0.704144	1.23346	1.05702	cluster1
HIST1H4A	P62805	Histone H4	-0.626436	-0.996772	-0.984307	-0.862274	1.29367	0.15367	0.729004	1.29344	cluster1
SPTB	P11277	Spectrin beta chain, erythrocytic	-0.0647056	-1.2205	-0.777908	-1.25401	0.213959	0.875856	0.981057	1.24625	cluster1
HIST2H3A	Q71DI3	Histone H3.2;Histone H3.3;Histone H3.1;Histone H3.3C;Histone H3.1t	-0.455284	-0.955104	-0.988034	-1.00735	1.30808	0.132118	0.644217	1.32135	cluster1
VWA1	Q6PCB0	von Willebrand factor A domain-containing protein 1	-1.03829	-0.986479	-0.667784	-0.389828	1.94403	0.283272	0.678359	0.176719	cluster1
PAFAH1B3	Q15102	Platelet-activating factor acetylhydrolase IB subunit gamma	-0.650174	-0.992939	-1.0808	-0.837162	0.65633	0.612092	0.766312	1.52634	cluster1
NAMPT	P43490	Nicotinamide phosphoribosyltransferase	-0.792023	-0.350945	-1.21774	-0.704314	1.938	0.144131	0.565367	0.417528	cluster1
CNRIP1	Q96F85	CB1 cannabinoid receptor-interacting protein 1	-0.214881	-0.801784	-1.71971	-0.367291	0.511349	0.850887	1.46941	0.272023	cluster1
SYNM	O15061	Synemin	-0.985491	-0.623406	-1.26838	-0.11117	1.4884	-0.337692	0.896274	0.941468	cluster1
PCK2	Q16822	Phosphoenolpyruvate carboxykinase [GTP], mitochondrial	-0.879684	-0.614222	-0.907046	-1.12824	1.00734	0.334789	0.750918	1.43615	cluster1
RAP1A	P62834	Ras-related protein Rap-1A	0.441994	-0.769416	-1.44636	-1.21476	0.996358	0.691867	0.24505	1.05527	cluster1
GRM7	Q14831	Metabotropic glutamate receptor 7	-1.2981	-1.21487	0.444558	-1.03798	0.621009	0.569244	0.861914	1.05423	cluster1
RBSN	Q9H1K0	Rabenosyn-5	-1.1151	-1.44126	-0.506589	-0.496553	0.811151	0.922213	0.901247	0.924893	cluster1
BAI2	O60241	Brain-specific angiogenesis inhibitor 2	-1.2844	0.39223	-0.773731	-1.38066	0.372842	0.671643	1.22163	0.780441	cluster1
NAV1	Q8NEY1	Neuron navigator 1	-0.963437	-1.54105	0.380014	-1.02544	0.826061	0.675439	0.867804	0.780607	cluster1
LUC7L2	Q9Y383	Putative RNA-binding protein Luc7-like 2	-1.13485	-1.03446	-1.38136	0.539813	1.09128	0.62019	0.756295	0.543091	cluster1
DEK	P35659	Protein DEK	-0.982903	-1.45821	-1.01621	0.196951	1.0817	0.962511	0.612516	0.603638	cluster1
RBMX	P38159	RNA-binding motif protein, X chromosome;RNA-binding motif protein, X chromosome, N-terminally processed	-1.22433	0.541213	-1.39503	-0.927397	0.481282	0.908435	0.948611	0.667217	cluster1
RAB11FIP2	Q7L804	Rab11 family-interacting protein 2	-1.32951	-0.859576	-1.32883	0.321706	0.771989	0.59819	0.872775	0.95326	cluster1
FAM96B	Q9Y3D0	Mitotic spindle-associated MMXD complex subunit MIP18	-0.945906	-1.42649	-1.15718	0.512424	0.816564	0.521992	0.593667	1.08492	cluster1
BOLA2	Q9H3K6	BolA-like protein 2	-1.4307	0.415899	-0.759506	-1.3058	0.762492	0.743212	1.03725	0.537144	cluster1
SLC4A1	P02730	Band 3 anion transport protein	-1.49808	-1.17393	-0.8733	0.53172	0.877957	0.800058	0.789224	0.54635	cluster1
NID1	P14543	Nidogen-1	0.430391	-1.13138	-1.1121	-1.30309	0.840665	0.43239	0.859519	0.983605	cluster1
ACOT8	O14734	Acyl-coenzyme A thioesterase 8	-1.01572	-0.4533	-0.762765	-1.35441	0.932353	0.619912	0.90613	1.1278	cluster1
PIK3R2	O00459	Phosphatidylinositol 3-kinase regulatory subunit beta	-0.369265	-1.3754	-0.693445	-1.0715	1.08376	0.465954	1.10385	0.856049	cluster1
PTPN1	P18031	Tyrosine-protein phosphatase non-receptor type 1	-1.30868	-1.27439	0.55568	-0.966207	1.06165	0.817902	0.60362	0.510425	cluster1
TMEM163	Q8TC26	Transmembrane protein 163	0.538493	-1.35879	-0.949022	-1.26128	0.519724	0.845129	0.849281	0.816463	cluster1
TERF2IP	Q9NYB0	Telomeric repeat-binding factor 2-interacting protein 1	-0.732953	-1.19512	-1.07547	-0.669983	1.10936	0.790397	0.901308	0.872463	cluster1
COX6B1	P14854	Cytochrome c oxidase subunit 6B1	0.531078	-1.22045	-1.2218	-1.16724	0.823266	0.744906	0.746748	0.763495	cluster1
TXNRD2	Q9NNW7	Thioredoxin reductase 2, mitochondrial	0.33625	-1.26598	-1.28494	-0.972343	0.627036	0.61286	1.08157	0.865545	cluster1
MTMR9	Q96QG7	Myotubularin-related protein 9	-1.01288	-0.955225	-0.66707	-1.02265	1.25408	0.908541	0.581995	0.913204	cluster1
RBBP4	Q09028	Histone-binding protein RBBP4	-0.868742	-1.01359	-1.02216	-0.823885	0.920268	0.85708	1.04479	0.906237	cluster1
ACSL4	O60488	Long-chain-fatty-acid--CoA ligase 4	-1.15394	-0.681197	-0.809363	-1.05122	0.997193	0.777038	0.964735	0.95675	cluster1
ACTB	P60709	Actin, cytoplasmic 1;Actin, cytoplasmic 1, N-terminally processed	0.501585	-1.18671	-1.28137	-1.12524	0.843114	0.735358	0.623414	0.889847	cluster1
TNC	P24821	Tenascin	-0.799117	-0.555493	-1.74642	-0.304111	0.900769	0.822015	0.904815	0.777545	cluster1
ACTG1	P63261	Actin, cytoplasmic 2;Actin, cytoplasmic 2, N-terminally processed	-0.914331	-0.922214	-0.940747	-0.959528	0.854709	0.895827	1.02573	0.960554	cluster1
GLUL	P15104	Glutamine synthetase	0.836581	0.823912	0.995909	0.782808	-1.27117	-1.41429	-0.618258	-0.135496	cluster2
HRSP12	P52758	Ribonuclease UK114	0.989567	0.960226	0.668627	0.96419	-1.00332	-1.1035	-1.18993	-0.285866	cluster2
GJA1	P17302	Gap junction alpha-1 protein	0.990996	1.01948	1.05832	0.6339	-1.06776	-0.899822	-0.8959	-0.839221	cluster2
GYG1	P46976	Glycogenin-1	0.909012	0.912999	0.895161	1.01477	-0.985858	-0.890895	-0.821315	-1.03387	cluster2
NIPSNAP3A	Q9UFN0	Protein NipSnap homolog 3A	0.723162	0.855263	0.992192	1.1281	-1.0191	-1.04122	-0.927863	-0.710537	cluster2
CST3	P01034	Cystatin-C	1.0781	0.894388	0.608555	1.08084	-0.633123	-0.907382	-1.17228	-0.949095	cluster2
PRMT5	O14744	Protein arginine N-methyltransferase 5;Protein arginine N-methyltransferase 5, N-terminally processed	0.883096	0.88437	0.93993	0.999649	-0.868878	-1.10866	-1.05916	-0.670342	cluster2
DBI	P07108	Acyl-CoA-binding protein	0.94934	0.818192	0.79301	1.14712	-0.99669	-0.993987	-0.979198	-0.737789	cluster2
PTGDS	P41222	Prostaglandin-H2 D-isomerase	0.708808	0.784975	0.817002	1.33891	-0.918748	-0.664112	-1.02418	-1.04266	cluster2
SYT2	Q8N9I0	Synaptotagmin-2	0.496224	0.983581	0.830006	1.31669	-0.700767	-1.08587	-0.897584	-0.942279	cluster2
TPP1	O14773	Tripeptidyl-peptidase 1	0.733805	0.902413	0.998569	1.06824	-1.15255	-0.759906	-0.89216	-0.898403	cluster2
S100B	P04271	Protein S100-B	0.816651	0.822878	0.834772	1.13181	-0.383114	-1.03212	-1.27723	-0.913645	cluster2
FECH	P22830	Ferrochelatase, mitochondrial	0.978092	0.984441	0.831642	0.887287	-1.30766	-0.858825	-0.766738	-0.748238	cluster2
MRPS36	P82909	28S ribosomal protein S36, mitochondrial	0.68625	1.00588	0.966569	1.03407	-1.18367	-0.875084	-0.740061	-0.893964	cluster2
BROX	Q5VW32	BRO1 domain-containing protein BROX	0.887738	0.858949	0.956867	1.0225	-0.754006	-0.992388	-0.981928	-0.997736	cluster2
PPP1R1B	Q9UD71	Protein phosphatase 1 regulatory subunit 1B	1.07163	0.69125	0.943218	0.996995	-0.78468	-1.09574	-0.831761	-0.990914	cluster2
NUCKS1	Q9H1E3	Nuclear ubiquitous casein and cyclin-dependent kinase substrate 1	0.601648	0.815663	0.912219	1.31172	-0.973804	-0.997761	-1.03759	-0.632094	cluster2
METTL7A	Q9H8H3	Methyltransferase-like protein 7A	0.904066	0.84505	0.890213	1.01478	-1.05693	-1.19668	-0.458957	-0.941547	cluster2
ALDH1A1	P00352	Retinal dehydrogenase 1	0.57252	0.980867	0.81206	0.941284	-1.55338	-0.38141	-0.109302	-1.26264	cluster2
ERMN	Q8TAM6	Ermin	0.4062	0.692551	0.767057	1.39016	-1.31828	0.0945653	-1.12247	-0.90979	cluster2
TF	P02787	Serotransferrin	0.61904	0.816278	0.433154	1.18963	-1.60351	-1.31119	0.0813973	-0.224803	cluster2
FHL1	Q13642	Four and a half LIM domains protein 1	0.750372	0.937684	0.856275	1.15539	-0.751903	-1.03475	-1.06508	-0.847993	cluster2
PADI2	Q9Y2J8	Protein-arginine deiminase type-2	0.614876	0.813924	0.903659	1.03305	-0.0734846	-0.900868	-0.748445	-1.64272	cluster2
GRB2	P62993	Growth factor receptor-bound protein 2	0.751952	0.961215	0.721138	1.2182	-1.06742	-0.683709	-0.736072	-1.16531	cluster2
JAM3	Q9BX67	Junctional adhesion molecule C	0.874541	0.954621	1.01613	0.886289	-0.904064	-1.05154	-0.834362	-0.941615	cluster2
LGI3	Q8N145	Leucine-rich repeat LGI family member 3	0.336298	0.989424	0.922901	1.08777	-1.17867	0.0493493	-0.952417	-1.25466	cluster2
TIMM13	Q9Y5L4	Mitochondrial import inner membrane translocase subunit Tim13	0.605941	0.707285	0.834969	1.00972	-0.995252	-1.37471	0.388669	-1.17663	cluster2
CSRP1	P21291	Cysteine and glycine-rich protein 1	0.57566	0.886701	0.781029	1.36043	-1.14702	-1.04358	-0.802228	-0.610982	cluster2
SLC27A1	Q6PCB7	Long-chain fatty acid transport protein 1	0.875566	0.813177	1.22983	0.772075	-1.07709	-0.766344	-0.852784	-0.994431	cluster2
SERPINI1	Q99574	Neuroserpin	0.787327	1.03852	1.01528	0.855396	-0.775736	-1.11148	-1.08513	-0.72417	cluster2
HSD17B8	Q92506	Estradiol 17-beta-dehydrogenase 8	0.944816	0.81317	0.854271	1.10039	-1.13509	-0.827729	-0.896363	-0.853467	cluster2
ZFYVE21	Q9BQ24	Zinc finger FYVE domain-containing protein 21	0.960206	0.948123	0.861035	0.948516	-1.17508	-0.872104	-0.857895	-0.812806	cluster2
LZIC	Q8WZA0	Protein LZIC	0.670242	0.790255	0.903558	0.825473	-1.27812	0.388007	-1.13162	-1.16779	cluster2
BCKDK	O14874	[3-methyl-2-oxobutanoate dehydrogenase [lipoamide]] kinase, mitochondrial	1.17096	0.811031	0.839891	0.864641	-0.930577	-1.14022	-0.960672	-0.655052	cluster2
ACAT2	Q9BWD1	Acetyl-CoA acetyltransferase, cytosolic	0.618299	0.847324	0.683756	1.01921	-1.26804	0.393001	-1.1677	-1.12585	cluster2
HIBADH	P31937	3-hydroxyisobutyrate dehydrogenase, mitochondrial	0.674498	0.792549	0.730721	1.0312	-1.3529	0.3071	-1.01467	-1.1685	cluster2
EML2	O95834	Echinoderm microtubule-associated protein-like 2	0.990166	0.892207	0.631156	1.06164	-0.893762	-1.37715	-0.376277	-0.927989	cluster2
L2HGDH	Q9H9P8	L-2-hydroxyglutarate dehydrogenase, mitochondrial	0.859497	0.842592	1.00496	0.988311	-0.976408	-1.21825	-0.727439	-0.773262	cluster2
VBP1	P61758	Prefoldin subunit 3	0.830121	0.792779	0.837155	1.23967	-0.83149	-0.872239	-1.01563	-0.980362	cluster2
PGAM5	Q96HS1	Serine/threonine-protein phosphatase PGAM5, mitochondrial	0.80322	0.84785	0.849429	1.14565	-1.03776	-0.810389	-1.25387	-0.544128	cluster2
FNBP1	Q96RU3	Formin-binding protein 1	1.18828	0.790245	0.783289	0.925027	-1.17779	-0.911662	-0.790338	-0.807053	cluster2
ALDH7A1	P49419	Alpha-aminoadipic semialdehyde dehydrogenase	0.81842	0.71813	0.515052	1.1129	-0.211466	-0.448684	-0.570729	-1.93362	cluster2
ELMO1	Q92556	Engulfment and cell motility protein 1	0.700795	0.754645	0.78499	0.862531	-1.41539	0.477265	-1.1317	-1.03314	cluster2
SERPINF1	P36955	Pigment epithelium-derived factor	0.947883	0.830942	0.894148	0.984219	-0.547414	-0.884596	-0.906466	-1.31872	cluster2
CHORDC1	Q9UHD1	Cysteine and histidine-rich domain-containing protein 1	0.92975	0.858357	0.946336	0.98148	-0.675342	-1.04783	-1.00997	-0.982784	cluster2
RDX	P35241	Radixin	0.746024	0.80323	0.535853	1.18287	-1.33062	-1.00469	0.203395	-1.13606	cluster2
NAPEPLD	Q6IQ20	N-acyl-phosphatidylethanolamine-hydrolyzing phospholipase D	0.875473	0.840827	1.08272	0.874291	-1.30323	-0.902342	-0.742211	-0.725524	cluster2
BASP1	P80723	Brain acid soluble protein 1	0.62868	0.699415	0.632777	1.50716	-0.643399	-0.640495	-1.43427	-0.749866	cluster2
CRYZL1	O95825	Quinone oxidoreductase-like protein 1	0.861847	0.962425	0.860188	1.03786	-1.03383	-0.77469	-0.874422	-1.03938	cluster2
HDHD1	Q08623	Pseudouridine-5-phosphatase	0.783355	0.964743	0.664604	1.26708	-0.80148	-1.01365	-0.924538	-0.940112	cluster2
EPHX2	P34913	Bifunctional epoxide hydrolase 2;Cytosolic epoxide hydrolase 2;Lipid-phosphate phosphatase	0.975293	0.979258	0.761276	0.99293	-0.748458	-0.975873	-0.845734	-1.13869	cluster2
FAM175B	Q15018	BRISC complex subunit Abro1	0.911273	0.925294	0.861223	0.992035	-1.06857	-1.01201	-0.552892	-1.05634	cluster2
GLTP	Q9NZD2	Glycolipid transfer protein	0.576324	0.750651	0.753895	1.00287	-0.0427994	-0.0323222	-1.5315	-1.47712	cluster2
IDH3G	P51553	Isocitrate dehydrogenase [NAD] subunit gamma, mitochondrial	0.902051	0.746664	0.588397	0.829518	-1.24394	0.51146	-0.991891	-1.34226	cluster2
MT-ND1	P03886	NADH-ubiquinone oxidoreductase chain 1	0.62545	0.753781	0.790623	0.790623	-1.49983	0.607405	-0.904399	-1.16365	cluster2
SSR4	P51571	Translocon-associated protein subunit delta	0.85116	1.00289	0.876971	0.98382	-0.709327	-1.10275	-0.910813	-0.991949	cluster2
NUDT3	O95989	Diphosphoinositol polyphosphate phosphohydrolase 1	0.650757	0.755804	0.933589	0.952681	-0.940679	0.17693	-1.02813	-1.50095	cluster2
CUTA	O60888	Protein CutA	0.634946	0.792803	0.644355	0.889255	-1.07764	-1.45588	0.619723	-1.04757	cluster2
PREX1	Q8TCU6	Phosphatidylinositol 3,4,5-trisphosphate-dependent Rac exchanger 1 protein	0.981439	0.776491	0.967247	0.919872	-1.32473	-0.799915	-0.534897	-0.985511	cluster2
SCG3	Q8WXD2	Secretogranin-3	1.01957	0.864537	0.761891	1.04611	-0.940785	-0.73032	-1.20739	-0.813622	cluster2
SH3BGRL	O75368	SH3 domain-binding glutamic acid-rich-like protein	0.661082	0.796146	0.674525	1.38424	-0.547882	-1.4488	-0.807927	-0.711381	cluster2
MPI	P34949	Mannose-6-phosphate isomerase	0.567867	0.841253	0.755325	0.794268	-1.54038	0.159147	-0.0383667	-1.53911	cluster2
LCMT1	Q9UIC8	Leucine carboxyl methyltransferase 1	0.707815	1.01562	0.825912	1.13945	-1.01576	-0.727723	-0.843166	-1.10215	cluster2
CHMP3	Q9Y3E7	Charged multivesicular body protein 3	0.789997	0.735399	0.824645	0.659607	-1.1775	0.604157	-1.23647	-1.19984	cluster2
CCDC92	Q53HC0	Coiled-coil domain-containing protein 92	0.812298	0.96804	0.819466	1.12048	-0.915329	-1.037	-0.888591	-0.879368	cluster2
ARPC5	O15511	Actin-related protein 2/3 complex subunit 5	0.542157	0.691891	0.794296	1.00456	-1.18795	-1.33429	-1.05074	0.540084	cluster2
GCA	P28676	Grancalcin	0.819269	0.937541	0.874165	1.0779	-0.698763	-1.07445	-0.905923	-1.02974	cluster2
EIF2S3	P41091	Eukaryotic translation initiation factor 2 subunit 3;Putative eukaryotic translation initiation factor 2 subunit 3-like protein	0.718289	0.763639	0.817886	0.804968	-1.31721	0.493987	-1.17384	-1.10772	cluster2
PNP	P00491	Purine nucleoside phosphorylase	0.715846	0.852213	0.793881	1.02139	-1.36404	-1.19465	0.0672715	-0.891908	cluster2
ECHDC1	Q9NTX5	Ethylmalonyl-CoA decarboxylase	0.695647	0.853987	0.818511	0.773556	-1.30713	-1.06569	0.445788	-1.21467	cluster2
GATM	P50440	Glycine amidinotransferase, mitochondrial	1.13858	0.934712	0.53028	1.07461	-0.856697	-1.00003	-0.934408	-0.887048	cluster2
HNMT	P50135	Histamine N-methyltransferase	0.58784	0.841873	0.717288	0.827348	-1.34521	0.589031	-0.854133	-1.36404	cluster2
SMAP1	Q8IYB5	Stromal membrane-associated protein 1	0.660028	0.873417	0.727149	0.691915	-1.2772	0.639657	-1.34994	-0.965033	cluster2
MTX2	O75431	Metaxin-2	0.636987	0.751821	0.801074	0.813069	0.480159	-1.16532	-1.63408	-0.683705	cluster2
PSMB7	Q99436	Proteasome subunit beta type-7	0.445457	0.73378	0.826768	0.959162	-1.28805	-0.0491838	-1.72858	0.100643	cluster2
ASRGL1	Q7L266	Isoaspartyl peptidase/L-asparaginase;Isoaspartyl peptidase/L-asparaginase alpha chain;Isoaspartyl peptidase/L-asparaginase beta chain	0.829751	0.898783	0.670738	1.23625	-0.518381	-0.93877	-1.12675	-1.05162	cluster2
DAAM2	Q86T65	Disheveled-associated activator of morphogenesis 2	0.599568	0.95533	0.895162	0.913603	-1.06217	-1.13985	0.122638	-1.28428	cluster2
MRPS27	Q92552	28S ribosomal protein S27, mitochondrial	0.778405	0.877154	0.841066	0.874501	-1.1917	0.147439	-1.12157	-1.2053	cluster2
AHCY	P23526	Adenosylhomocysteinase	0.653904	0.835323	0.628305	0.828277	-2.12745	-0.444077	-0.170631	-0.203651	cluster2
HCN2	Q9UL51	Potassium/sodium hyperpolarization-activated cyclic nucleotide-gated channel 2	0.895233	0.993258	0.926995	0.886614	-0.702443	-0.976855	-1.20252	-0.820279	cluster2
OGFRL1	Q5TC84	Opioid growth factor receptor-like protein 1	0.876645	1.01063	1.10538	0.706074	-0.987075	-0.852674	-1.10331	-0.755671	cluster2
PSME1	Q06323	Proteasome activator complex subunit 1	1.06068	0.676291	0.533988	0.777355	-1.14926	0.515071	-1.32555	-1.08858	cluster2
NADK2	Q4G0N4	NAD kinase 2, mitochondrial	0.582625	0.808447	0.590247	0.994055	0.612681	-1.1472	-1.22698	-1.21387	cluster2
FAM98B	Q52LJ0	Protein FAM98B	0.677451	0.736862	0.681341	0.89913	-1.07789	0.606518	-1.3389	-1.18451	cluster2
SPR	P35270	Sepiapterin reductase	0.761091	0.98195	0.50094	0.870981	-0.977033	-1.28121	0.433002	-1.28972	cluster2
DENR	O43583	Density-regulated protein	0.902159	0.640326	0.416192	1.13486	-1.43482	0.380227	-1.14796	-0.890986	cluster2
MXRA7	P84157	Matrix-remodeling-associated protein 7	0.330885	0.742544	0.775755	1.26466	-1.19735	0.333633	-0.949706	-1.30042	cluster2
HERC4	Q5GLZ8	Probable E3 ubiquitin-protein ligase HERC4	0.825291	0.870598	1.01425	0.948618	-0.964934	-0.514744	-1.26579	-0.913293	cluster2
CYB5R2	Q6BCY4	NADH-cytochrome b5 reductase 2	0.43582	0.747774	0.821256	1.00659	-1.2006	-1.22141	0.558578	-1.148	cluster2
FAIM2	Q9BWQ8	Protein lifeguard 2	0.699792	0.706811	0.843707	0.775438	-1.46776	0.550379	-1.14832	-0.96005	cluster2
GAMT	Q14353	Guanidinoacetate N-methyltransferase	0.673639	0.876676	0.730857	0.746618	-1.44545	0.490803	-1.3582	-0.714948	cluster2
AGT	P01019	Angiotensinogen;Angiotensin-1;Angiotensin-2;Angiotensin-3;Angiotensin-4;Angiotensin 1-9;Angiotensin 1-7;Angiotensin 1-5;Angiotensin 1-4	0.710506	0.735938	0.591095	0.979097	-1.58737	-0.862177	0.498012	-1.0651	cluster2
APEH	P13798	Acylamino-acid-releasing enzyme	0.62074	0.817877	0.749682	0.868496	-2.07192	-0.259518	-0.418175	-0.307178	cluster2
OPALIN	Q96PE5	Opalin	0.673963	0.851758	1.02932	1.13671	-0.806455	-1.02153	-0.79407	-1.06969	cluster2
GNG13	Q9P2W3	Guanine nucleotide-binding protein G(I)/G(S)/G(O) subunit gamma-13	0.669882	0.943098	0.746863	1.23398	-0.588458	-0.616394	-1.22204	-1.16693	cluster2
PGP	A6NDG6	Phosphoglycolate phosphatase	0.834559	0.921936	0.870663	1.0773	-1.07279	-0.685472	-0.872299	-1.0739	cluster2
CRYZ	Q08257	Quinone oxidoreductase	0.795409	0.913646	0.500559	0.830372	-2.03672	-0.598598	-0.247491	-0.157178	cluster2
SRI	P30626	Sorcin	1.02953	0.82077	0.580761	1.18352	-1.21451	-0.570821	-0.74967	-1.07959	cluster2
KCNA1	Q09470	Potassium voltage-gated channel subfamily A member 1	0.329493	0.773152	0.979379	0.914317	-1.04051	0.450039	-0.803425	-1.60244	cluster2
ATP1B3	P54709	Sodium/potassium-transporting ATPase subunit beta-3	0.578515	0.68027	0.795445	0.992521	-1.19463	0.506018	-0.932983	-1.42515	cluster2
AHCYL1	O43865	Putative adenosylhomocysteinase 2	0.850575	0.804993	0.856879	0.960093	-1.68961	-0.449199	-0.551759	-0.781969	cluster2
SLC25A18	Q9H1K4	Mitochondrial glutamate carrier 2	1.18516	0.897267	0.799966	0.786261	-1.01833	-0.708186	-0.739008	-1.20312	cluster2
RABL6	Q3YEC7	Rab-like protein 6	0.796597	0.711939	0.7188	0.767706	-1.11796	0.572283	-1.5209	-0.928458	cluster2
MRPL49	Q13405	39S ribosomal protein L49, mitochondrial	0.64554	0.884198	0.859534	0.591162	-0.930511	-1.24556	0.590902	-1.39527	cluster2
GABRG2	P18507	Gamma-aminobutyric acid receptor subunit gamma-2;Gamma-aminobutyric acid receptor subunit gamma-1	0.703041	0.78007	0.738902	0.765261	-1.27758	0.628526	-1.21774	-1.12048	cluster2
HSPE1	P61604	10 kDa heat shock protein, mitochondrial	0.347572	0.899259	0.804087	1.21176	-1.04945	-1.53488	-0.705454	0.0271109	cluster2
ATP6V1G1	O75348	V-type proton ATPase subunit G 1	0.74407	0.785317	0.888183	0.815472	-1.14074	-1.1928	0.339919	-1.23943	cluster2
ARRB1	P49407	Beta-arrestin-1	0.725488	0.889689	0.664535	0.716725	0.125576	-0.0550353	-1.48425	-1.58272	cluster2
PTCD3	Q96EY7	Pentatricopeptide repeat domain-containing protein 3, mitochondrial	0.862227	1.12053	0.802929	0.876425	-0.859002	-0.834179	-1.31315	-0.655789	cluster2
TMEM126A	Q9H061	Transmembrane protein 126A	0.816154	0.753616	0.541405	0.936226	-1.04939	0.521095	-1.41863	-1.10047	cluster2
PRDX6	P30041	Peroxiredoxin-6	0.604674	0.973108	0.792312	1.2542	-0.921152	-0.939099	-0.565538	-1.1985	cluster2
C16orf70	Q9BSU1	UPF0183 protein C16orf70	0.820873	1.05113	0.765704	1.04889	-0.703471	-0.826341	-1.2034	-0.953378	cluster2
GMPPA	Q96IJ6	Mannose-1-phosphate guanyltransferase alpha	0.701125	0.904906	0.917364	1.15857	-0.848067	-0.829303	-0.790675	-1.21392	cluster2
FBXL18	Q96ME1	F-box/LRR-repeat protein 18	0.98649	0.805284	0.787996	0.610839	-1.03369	0.364983	-1.22507	-1.29683	cluster2
SLC9A3R1	O14745	Na(+)/H(+) exchange regulatory cofactor NHE-RF1	0.590122	0.284475	0.734746	1.38131	-1.40661	-1.46094	-0.0967674	-0.0263296	cluster2
LRRC8A	Q8IWT6	Volume-regulated anion channel subunit LRRC8A	0.626131	0.755517	1.04613	0.795763	-1.18201	0.325763	-1.13779	-1.2295	cluster2
TMEM33	P57088	Transmembrane protein 33	0.591551	0.960094	0.935996	1.19587	-0.859634	-0.886605	-1.06998	-0.867287	cluster2
ALDOC	P09972	Fructose-bisphosphate aldolase C	0.86503	0.855529	0.834114	1.03738	-1.42574	-0.838324	-0.408453	-0.919538	cluster2
GFOD1	Q9NXC2	Glucose-fructose oxidoreductase domain-containing protein 1	0.713888	0.993692	0.72385	0.618414	-1.25432	-1.42526	0.494324	-0.864596	cluster2
LGI4	Q8N135	Leucine-rich repeat LGI family member 4	0.934333	0.915548	0.786049	0.978364	-0.960423	-0.649646	-0.577371	-1.42685	cluster2
PMP2	P02689	Myelin P2 protein	-0.0698829	0.812845	0.700608	1.61396	-0.789369	-1.51125	-0.228017	-0.528895	cluster2
SNCG	O76070	Gamma-synuclein	0.484879	0.9443	0.752483	1.39257	-1.22298	-0.800541	-0.65535	-0.895363	cluster2
SERPINB9	P50453	Serpin B9	0.810727	0.842282	0.695336	0.738703	-1.0748	-1.29117	0.511761	-1.23284	cluster2
NPLOC4	Q8TAT6	Nuclear protein localization protein 4 homolog	0.642796	0.826942	0.779844	0.726391	-1.06969	0.630512	-1.20622	-1.33057	cluster2
HDAC11	Q96DB2	Histone deacetylase 11	0.57857	0.681796	0.791368	1.15291	-0.997891	0.30402	-1.30411	-1.20666	cluster2
SCN1A	P35498	Sodium channel protein type 1 subunit alpha	0.376034	0.955111	0.870766	0.941773	-0.880058	0.33965	-1.19486	-1.40842	cluster2
CEP41	Q9BYV8	Centrosomal protein of 41 kDa	0.64239	0.80373	0.813734	0.706515	-1.35313	0.534288	-1.49665	-0.650876	cluster2
S100A1	P23297	Protein S100-A1	0.606367	0.717009	0.97306	1.24027	-1.16592	-1.08782	-1.00712	-0.275854	cluster2
STX8	Q9UNK0	Syntaxin-8	0.774923	0.737596	0.804958	0.644104	-1.36702	0.628906	-1.27974	-0.943728	cluster2
GHITM	Q9H3K2	Growth hormone-inducible transmembrane protein	0.692014	0.865499	0.859337	0.766372	-1.12519	-0.896684	-1.50311	0.341763	cluster2
ALDH4A1	P30038	Delta-1-pyrroline-5-carboxylate dehydrogenase, mitochondrial	0.945772	0.760257	0.708971	0.82709	-1.87991	-0.169152	-0.414211	-0.778815	cluster2
SELENBP1	Q13228	Selenium-binding protein 1	0.911503	0.816918	0.736326	1.0584	-0.443205	-1.2312	-0.467104	-1.38165	cluster2
LRRC16A	Q5VZK9	Leucine-rich repeat-containing protein 16A	0.672313	0.749542	0.949763	0.933812	-1.07573	-0.904925	0.161786	-1.48657	cluster2
DDB1	Q16531	DNA damage-binding protein 1	0.72916	0.884953	0.978473	0.827158	-1.62126	-0.634084	-0.17286	-0.991536	cluster2
PNPLA8	Q9NP80	Calcium-independent phospholipase A2-gamma	0.783125	0.778866	0.796652	1.2801	-0.68019	-0.707616	-1.19632	-1.05462	cluster2
SGIP1	Q9BQI5	SH3-containing GRB2-like protein 3-interacting protein 1	0.565081	0.939687	0.891288	1.03366	-1.21475	-0.513056	-0.239507	-1.4624	cluster2
PPP2R5A	Q15172	Serine/threonine-protein phosphatase 2A 56 kDa regulatory subunit alpha isoform	0.844853	0.886451	0.590782	0.762847	-1.38544	0.419783	-1.39739	-0.721892	cluster2
OXR1	Q8N573	Oxidation resistance protein 1	0.618785	0.961122	0.856538	0.869441	-1.31372	-0.261677	-0.189919	-1.54057	cluster2
ECHS1	P30084	Enoyl-CoA hydratase, mitochondrial	0.584165	1.05083	0.834912	1.03697	-1.12759	-0.816156	-0.223509	-1.33963	cluster2
SLC1A2	P43004	Excitatory amino acid transporter 2	1.02125	0.550444	0.952472	0.748013	-1.49605	-0.211848	-1.36558	-0.198706	cluster2
ELMO2	Q96JJ3	Engulfment and cell motility protein 2	0.775368	0.83631	0.678661	0.754119	-1.45211	0.538803	-1.07741	-1.05374	cluster2
CA2	P00918	Carbonic anhydrase 2	0.564199	1.07177	0.862416	1.04885	-0.637012	-0.94732	-0.502164	-1.46074	cluster2
ABHD10	Q9NUJ1	Mycophenolic acid acyl-glucuronide esterase, mitochondrial	0.696986	0.932646	0.717245	0.950786	-0.752495	-0.632775	-0.110422	-1.80197	cluster2
GDA	Q9Y2T3	Guanine deaminase	0.842027	1.06275	0.731078	0.987131	-1.27046	-0.42499	-0.952081	-0.975458	cluster2
SLC1A3	P43003	Excitatory amino acid transporter 1	0.814579	0.392122	0.841889	1.45341	-1.12691	-0.75832	-0.484656	-1.13211	cluster2
EZR	P15311	Ezrin	0.989323	0.904196	0.71267	0.991614	-1.02877	-1.35492	-0.405478	-0.808638	cluster2
TPM1	P09493	Tropomyosin alpha-1 chain	0.610071	0.568907	0.708654	1.11342	-1.53475	-1.24458	-0.673556	0.451835	cluster2
HECTD3	Q5T447	E3 ubiquitin-protein ligase HECTD3	0.671498	0.718085	0.858825	0.764127	-1.62139	0.51539	-0.952906	-0.953623	cluster2
PKM	P14618	Pyruvate kinase PKM	0.866135	0.939181	0.835678	0.958526	-1.45359	-0.911914	-0.467479	-0.766539	cluster2
CALB2	P22676	Calretinin	0.802148	1.17677	0.292815	0.903356	-1.3855	-0.781708	0.214186	-1.22206	cluster2
AGK	Q53H12	Acylglycerol kinase, mitochondrial	0.300668	0.702598	0.727158	1.56305	-0.891078	-0.21133	-0.775384	-1.41568	cluster2
ACOT7	O00154	Cytosolic acyl coenzyme A thioester hydrolase	0.467276	1.14249	0.98329	0.83584	-1.5385	-0.650956	-0.264727	-0.974717	cluster2
STIP1	P31948	Stress-induced-phosphoprotein 1	0.421805	0.932448	0.892179	1.2623	-0.686097	-1.48033	-0.660312	-0.681997	cluster2
DECR1	Q16698	2,4-dienoyl-CoA reductase, mitochondrial	0.619638	0.793246	0.778397	1.2043	-0.527674	-0.814828	-0.362988	-1.69009	cluster2
MARCKS	P29966	Myristoylated alanine-rich C-kinase substrate	0.419334	0.741644	0.802792	1.50933	-0.424574	-1.23719	-0.89593	-0.915412	cluster2
HSPA2	P54652	Heat shock-related 70 kDa protein 2	0.573716	0.620694	0.621517	1.25078	-0.279725	-1.74831	0.0553818	-1.09405	cluster2
DPYSL3	Q14195	Dihydropyrimidinase-related protein 3	0.594356	1.04172	0.657423	1.09639	-1.73261	-0.471776	-0.598431	-0.58708	cluster2
SKIV2L	Q15477	Helicase SKI2W	0.492088	0.828454	1.01616	0.760385	0.460973	-1.26255	-1.04892	-1.24658	cluster2
ALDH5A1	P51649	Succinate-semialdehyde dehydrogenase, mitochondrial	0.839766	0.928646	0.886669	0.854974	-1.62573	-0.384962	-0.750427	-0.748933	cluster2
AHNAK2	Q8IVF2	Protein AHNAK2	0.264691	0.931417	0.99171	1.07955	-1.58258	-0.719712	-0.0214268	-0.943653	cluster2
ALDOA	P04075	Fructose-bisphosphate aldolase A	1.00999	0.889209	0.782302	0.931068	-1.31801	-1.1459	-0.588436	-0.560231	cluster2
VAT1L	Q9HCJ6	Synaptic vesicle membrane protein VAT-1 homolog-like	1.02896	0.909021	0.580955	0.888707	-0.33506	-0.330202	-1.31642	-1.42596	cluster2
ST13	P50502	Hsc70-interacting protein;Putative protein FAM10A5;Putative protein FAM10A4	0.564785	0.888914	0.852592	1.16789	-0.670066	-1.05859	-0.278228	-1.46729	cluster2
NDRG2	Q9UN36	Protein NDRG2	0.761204	0.756462	0.88851	0.914802	-1.7755	-0.892799	-0.498864	-0.153812	cluster2
ALDH9A1	P49189	4-trimethylaminobutyraldehyde dehydrogenase	0.957366	0.818689	0.875846	1.04969	-1.18626	-0.848319	-0.715343	-0.951673	cluster2
ENO2	P09104	Gamma-enolase	0.0620911	0.50473	0.618781	1.94227	-1.08821	-0.585494	-0.697088	-0.757078	cluster2
NARS	O43776	Asparagine--tRNA ligase, cytoplasmic	0.44949	1.03348	1.1102	1.01767	-0.999226	-0.697992	-1.22612	-0.687504	cluster2
PPP3R1	P63098	Calcineurin subunit B type 1	0.634072	0.846005	0.823683	0.9455	-1.66973	-0.376534	-0.0285996	-1.1744	cluster2
PARK7	Q99497	Protein deglycase DJ-1	0.59228	0.77741	0.608685	1.48757	-1.21748	-0.793468	-0.34596	-1.10903	cluster2
CYCS	P99999	Cytochrome c	0.466426	1.13431	0.675948	1.11467	-0.491821	-0.712511	-1.66593	-0.521087	cluster2
SNCB	Q16143	Beta-synuclein	0.833767	0.886303	0.79142	0.989549	-1.46646	-0.98753	-0.177204	-0.869847	cluster2
MAG	P20916	Myelin-associated glycoprotein	0.375585	0.709488	1.07831	1.13499	-0.588543	-0.375874	-0.578224	-1.75573	cluster2
HSD17B10	Q99714	3-hydroxyacyl-CoA dehydrogenase type-2	0.289859	1.00153	0.780539	1.21006	-0.395124	-0.188293	-1.40715	-1.29143	cluster2
CTBP1	Q13363	C-terminal-binding protein 1	1.09223	0.904205	0.566436	0.875183	-1.63922	-0.300584	-0.78721	-0.711038	cluster2
GLUD1	P00367	Glutamate dehydrogenase 1, mitochondrial;Glutamate dehydrogenase 2, mitochondrial	0.777976	0.690641	0.825709	0.960222	-1.91821	-0.5926	-0.429554	-0.31418	cluster2
HPRT1	P00492	Hypoxanthine-guanine phosphoribosyltransferase	0.380536	0.990071	0.374524	1.59239	-0.837073	-1.31314	-0.407797	-0.779519	cluster2
PPP1R7	Q15435	Protein phosphatase 1 regulatory subunit 7	0.717092	0.963634	0.638628	0.953698	-0.983869	-0.635187	0.0391668	-1.69316	cluster2
NDUFS4	O43181	NADH dehydrogenase [ubiquinone] iron-sulfur protein 4, mitochondrial	0.630826	0.978447	0.954729	0.877806	-1.35387	-0.565058	-0.190996	-1.33189	cluster2
PPP3CA	Q08209	Serine/threonine-protein phosphatase 2B catalytic subunit alpha isoform	0.807805	0.82731	0.824281	0.670636	-1.80972	-0.530843	0.182027	-0.971497	cluster2
TPM3	P06753	Tropomyosin alpha-3 chain	0.626276	0.480225	0.820449	1.18595	-1.65544	-1.22832	-0.21955	-0.0095794	cluster2
LGI1	O95970	Leucine-rich glioma-inactivated protein 1	0.311037	0.803018	0.932602	1.04115	-1.14304	-1.69755	-0.330849	0.0836331	cluster2
SLC4A4	Q9Y6R1	Electrogenic sodium bicarbonate cotransporter 1	0.861486	0.569568	1.21667	0.736622	-1.7233	-0.672215	-0.495808	-0.493018	cluster2
AK3	Q9UIJ7	GTP:AMP phosphotransferase AK3, mitochondrial	1.20311	0.888145	0.151548	1.1192	-0.298106	-0.624596	-1.35017	-1.08913	cluster2
COTL1	Q14019	Coactosin-like protein	0.535504	0.941391	0.715246	0.896138	0.251228	-0.597326	-1.77894	-0.963236	cluster2
ATP6V1B2	P21281	V-type proton ATPase subunit B, brain isoform	0.851072	0.907797	0.937263	0.842493	-1.61658	-0.535752	-0.661096	-0.725197	cluster2
AKR7A2	O43488	Aflatoxin B1 aldehyde reductase member 2	1.0621	1.03252	0.221993	1.19693	-0.599524	-1.16716	-0.677854	-1.069	cluster2
CCT8	P50990	T-complex protein 1 subunit theta	0.493498	0.863272	1.00983	1.15205	-1.05669	-1.00572	-0.240318	-1.21591	cluster2
TPM4	P67936	Tropomyosin alpha-4 chain	0.700864	0.660764	0.779776	1.31326	-0.952568	-1.46628	-0.787772	-0.248045	cluster2
CFL2	Q9Y281	Cofilin-2	0.507987	0.908729	0.642842	1.24593	-0.502998	-0.781574	-0.287726	-1.73319	cluster2
CAPZA1	P52907	F-actin-capping protein subunit alpha-1	0.47954	0.956023	0.982629	1.05619	-1.23422	-1.1135	-0.129107	-0.997551	cluster2
ADH5	P11766	Alcohol dehydrogenase class-3	0.791615	0.836809	0.829478	1.12581	-1.37674	-0.84006	-0.381564	-0.985342	cluster2
SEPT4	O43236	Septin-4	0.375864	0.860105	0.772943	1.43549	-1.30681	-0.691257	-0.384555	-1.06178	cluster2
PEBP1	P30086	Phosphatidylethanolamine-binding protein 1;Hippocampal cholinergic neurostimulating peptide	0.671357	0.853822	0.947078	1.1799	-1.14951	-0.917262	-0.556361	-1.02902	cluster2
CRYM	Q14894	Ketimine reductase mu-crystallin	0.841893	0.767506	0.843404	0.574412	-1.44322	-0.579637	0.429926	-1.43428	cluster2
MYO6	Q9UM54	Unconventional myosin-VI	0.755831	0.419129	1.15057	1.02186	-1.72826	-0.664556	-0.455962	-0.498606	cluster2
PREPL	Q4J6C6	Prolyl endopeptidase-like	0.526009	0.910265	0.761821	1.32431	-1.3274	-0.490841	-1.08183	-0.622333	cluster2
ACOT9	Q9Y305	Acyl-coenzyme A thioesterase 9, mitochondrial	0.722421	0.512515	1.10548	1.04814	-1.61801	-0.876598	-0.680209	-0.213743	cluster2
CDC37	Q16543	Hsp90 co-chaperone Cdc37;Hsp90 co-chaperone Cdc37, N-terminally processed	0.595869	0.745653	0.800159	1.21792	-1.07939	-0.671345	-0.0780283	-1.53085	cluster2
FABP3	P05413	Fatty acid-binding protein, heart	0.63624	0.755603	1.04594	0.789786	-0.986104	-0.471368	-0.00604909	-1.76405	cluster2
PCMT1	P22061	Protein-L-isoaspartate(D-aspartate) O-methyltransferase	0.39033	0.95745	0.132845	1.64699	-1.15978	-0.313371	-0.386337	-1.26813	cluster2
CRAT	P43155	Carnitine O-acetyltransferase	0.434283	1.12161	0.878043	1.06842	-1.20915	-0.333417	-0.708532	-1.25126	cluster2
SNCA	P37840	Alpha-synuclein	0.743618	1.18491	1.03802	0.482461	-1.02911	-0.946737	-0.148242	-1.32492	cluster2
CCT4	P50991	T-complex protein 1 subunit delta	0.679491	0.985782	1.07485	0.815764	-1.17148	-0.738038	-0.336648	-1.30972	cluster2
TPT1	P13693	Translationally-controlled tumor protein	0.648264	0.885147	0.791906	0.787086	-0.167421	0.0382672	-1.67906	-1.30418	cluster2
UQCRB	P14927	Cytochrome b-c1 complex subunit 7	0.570253	0.834355	0.684969	1.46349	-1.2805	-0.817002	-0.703687	-0.751873	cluster2
ACO2	Q99798	Aconitate hydratase, mitochondrial	0.856509	1.04549	0.785754	0.727985	-1.32744	-0.528969	-0.159866	-1.39946	cluster2
GRHPR	Q9UBQ7	Glyoxylate reductase/hydroxypyruvate reductase	0.817974	1.12897	0.842996	0.927468	-1.05024	-0.973725	-0.831423	-0.862027	cluster2
GPHN	Q9NQX3	Gephyrin;Molybdopterin adenylyltransferase;Molybdopterin molybdenumtransferase	0.55014	0.749299	1.11807	0.953742	-1.4196	-0.425325	-0.208547	-1.31778	cluster2
ALDH2	P05091	Aldehyde dehydrogenase, mitochondrial	0.892414	0.737037	0.44844	1.07637	-1.28728	-0.378223	0.0899979	-1.57875	cluster2
PAICS	P22234	Multifunctional protein ADE2;Phosphoribosylaminoimidazole-succinocarboxamide synthase;Phosphoribosylaminoimidazole carboxylase	0.61988	0.736808	0.399758	1.48898	-1.21018	-1.38644	-0.546646	-0.10216	cluster2
DLST	P36957	Dihydrolipoyllysine-residue succinyltransferase component of 2-oxoglutarate dehydrogenase complex, mitochondrial	0.494659	0.751664	0.79489	1.02295	-1.46533	-1.53517	0.0233341	-0.0869938	cluster2
PABPC1	P11940	Polyadenylate-binding protein 1;Polyadenylate-binding protein 3	0.494351	0.936979	1.16922	0.7702	-1.18423	-1.15854	0.0536384	-1.08161	cluster2
AGL	P35573	Glycogen debranching enzyme;4-alpha-glucanotransferase;Amylo-alpha-1,6-glucosidase	0.348863	1.27133	0.723585	0.792122	-1.82596	-0.316982	-0.193688	-0.799271	cluster2
NDUFB7	P17568	NADH dehydrogenase [ubiquinone] 1 beta subcomplex subunit 7	0.495529	0.726195	1.08961	1.03139	-1.33054	-0.223957	-1.42171	-0.36651	cluster2
PDHA1	P08559	Pyruvate dehydrogenase E1 component subunit alpha, somatic form, mitochondrial	0.75562	0.592052	0.841833	0.865346	-1.10008	-0.512844	0.305742	-1.74767	cluster2
ARPC5L	Q9BPX5	Actin-related protein 2/3 complex subunit 5-like protein	0.0881447	0.765838	0.973755	1.23775	-1.46275	-1.21681	-0.532653	0.146724	cluster2
QDPR	P09417	Dihydropteridine reductase	0.13326	0.799885	0.466579	1.65572	-0.0855718	-0.979144	-0.52857	-1.46215	cluster2
ILF2	Q12905	Interleukin enhancer-binding factor 2	0.312874	1.07259	0.87498	1.22119	-1.20642	-0.996537	-0.301171	-0.977512	cluster2
SKP1	P63208	S-phase kinase-associated protein 1	0.531172	1.12313	0.889563	1.02122	-1.22832	-1.0984	-0.35442	-0.88395	cluster2
CAPZB	P47756	F-actin-capping protein subunit beta	0.867701	0.981335	0.786052	0.925178	-1.50408	-0.625284	-0.45732	-0.973577	cluster2
NDUFV1	P49821	NADH dehydrogenase [ubiquinone] flavoprotein 1, mitochondrial	0.655345	1.22658	0.807991	0.789426	-0.893425	-0.186915	-1.00048	-1.39853	cluster2
MRPL12	P52815	39S ribosomal protein L12, mitochondrial	0.503375	0.976649	1.11109	0.603058	-1.68155	-0.734115	0.123091	-0.901596	cluster2
SIRT2	Q8IXJ6	NAD-dependent protein deacetylase sirtuin-2	0.16203	0.7228	0.842374	1.32387	-0.138579	-1.08625	-0.164007	-1.66224	cluster2
NDUFV2	P19404	NADH dehydrogenase [ubiquinone] flavoprotein 2, mitochondrial	0.365222	0.81706	0.586825	1.37329	-0.739901	-1.00765	0.149085	-1.54393	cluster2
DPYSL2	Q16555	Dihydropyrimidinase-related protein 2	0.731165	1.11111	0.436606	1.16031	-1.44464	-0.74628	-0.256117	-0.992159	cluster2
