# Supplementary material for: Cortical Pathology in Vanishing White Matter
Source: Cells. 2022 Nov 12;11(22):3581. doi: 10.3390/cells11223581 (PMC9688115; doi:10.3390/cells11223581)
Supplement: Supplementary file 1 [file cells-11-03581-s001.zip › cells-1858119_Man et al. Table S4_final.xlsx]

## Sheet: Table S4
Cell type	Direction	Cell type enriched proteins
Fetal astrocytes	Upregulated	PAFAH1B3, BAI2, BOLA2, ACOT8, PIK3R2, TNC
	Downregulated	SYT2, CDC37, NDUFB7, NDUFV1
Mature astrocytes	Upregulated
	Downregulated	AGT, AHCYL1, ALDH1A1, ALDH2, ALDH4A1, ALDH7A1, ALDOC, ASRGL1, CST3, GJA1, GLUD1, GLUL, HRSP12, LGI4, LRRC16A, LRRC8A, NDRG2, NUDT3, PMP2, PPP1R1B, PRDX6, PTGDS, S100A1, SCG3, SELENBP1, SLC1A2, SLC1A3, SLC25A18, SLC4A4, SLC9A3R1, SNCG, TPP1, ZFYVE21
Neurons	Upregulated	CNRIP1, GRM7
	Downregulated	SERPINI1, KCNA1, GABRG2, GFOD1, SCN1A, SGIP1, OXR1, GDA, CALB2, VAT1L, ENO2, SNCB, CRYM, PREPL, FABP3, SNCA
Oligodendrocytes	Upregulated
	Downregulated	ERMN, LGI3, GLTP, DAAM2, CYB5R2, OPALIN, HSPA2, MAG, CFL2, QDPR
Microglia	Upregulated
	Downregulated	ATP1B3, OGFRL1, PABPC1, PNP, SERPINB9
