# Supplementary material for: Cortical Pathology in Vanishing White Matter
Source: Cells. 2022 Nov 12;11(22):3581. doi: 10.3390/cells11223581 (PMC9688115; doi:10.3390/cells11223581)
Supplement: Supplementary file 1 [file cells-11-03581-s001.zip › cells-1858119_Man et al. Table S5_final.xlsx]

## Sheet: Table S5A
Protein name	ProteinID	Description	Log2(FC)	Direction	In largest subnetwork?
ACTG1	P63261	Actin, cytoplasmic 2;Actin, cytoplasmic 2, N-terminally processed	7.22342	up	Yes
TNC	P24821	Tenascin	7.08338	up	Yes
ACTB	P60709	Actin, cytoplasmic 1;Actin, cytoplasmic 1, N-terminally processed	6.35106	up	Yes
ACSL4	O60488	Long-chain-fatty-acid--CoA ligase 4	5.31817	up	Yes
RBBP4	Q09028	Histone-binding protein RBBP4	5.17863	up	Yes
TXNRD2	Q9NNW7	Thioredoxin reductase 2, mitochondrial	4.6627	up	Yes
COX6B1	P14854	Cytochrome c oxidase subunit 6B1	4.35499	up	Yes
TERF2IP	Q9NYB0	Telomeric repeat-binding factor 2-interacting protein 1	4.26451	up	Yes
TMEM163	Q8TC26	Transmembrane protein 163	4.17817	up	Yes
PTPN1	P18031	Tyrosine-protein phosphatase non-receptor type 1	4.17142	up	Yes
PIK3R2	O00459	Phosphatidylinositol 3-kinase regulatory subunit beta	4.1484	up	Yes
ACOT8	O14734	Acyl-coenzyme A thioesterase 8	4.02545	up	Yes
SLC4A1	P02730	Band 3 anion transport protein	3.96363	up	Yes
FAM96B	Q9Y3D0	Mitotic spindle-associated MMXD complex subunit MIP18	3.92705	up	Yes
RBMX	P38159	RNA-binding motif protein, X chromosome;RNA-binding motif protein, X chromosome, N-terminally processed	3.75223	up	Yes
DEK	P35659	Protein DEK	3.57821	up	Yes
LUC7L2	Q9Y383	Putative RNA-binding protein Luc7-like 2	3.57531	up	Yes
NAV1	Q8NEY1	Neuron navigator 1	3.39269	up	Yes
GRM7	Q14831	Metabotropic glutamate receptor 7	3.1532	up	Yes
RAP1A	P62834	Ras-related protein Rap-1A	2.88092	up	Yes
PCK2	Q16822	Phosphoenolpyruvate carboxykinase [GTP], mitochondrial	2.62862	up	Yes
SYNM	O15061	Synemin	2.36221	up	Yes
CNRIP1	Q96F85	CB1 cannabinoid receptor-interacting protein 1	2.05425	up	Yes
NAMPT	P43490	Nicotinamide phosphoribosyltransferase	2.05301	up	Yes
HIST2H3A	Q71DI3	Histone H3.2;Histone H3.3;Histone H3.1;Histone H3.3C;Histone H3.1t	1.95323	up	Yes
SPTB	P11277	Spectrin beta chain, erythrocytic	1.87199	up	Yes
HIST1H4A	P62805	Histone H4	1.84823	up	Yes
PSD3	Q9NYI0	PH and SEC7 domain-containing protein 3	1.82398	up	Yes
SLC7A5	Q01650	Large neutral amino acids transporter small subunit 1	1.81964	up	Yes
PPIA	P62937	Peptidyl-prolyl cis-trans isomerase A;Peptidyl-prolyl cis-trans isomerase A, N-terminally processed	1.81027	up	Yes
NONO	Q15233	Non-POU domain-containing octamer-binding protein	1.68161	up	Yes
HNRNPA2B1	P22626	Heterogeneous nuclear ribonucleoproteins A2/B1	1.65767	up	Yes
DPYSL2	Q16555	Dihydropyrimidinase-related protein 2	-1.52718	down	Yes
NDUFV2	P19404	NADH dehydrogenase [ubiquinone] flavoprotein 2, mitochondrial	-1.53808	down	Yes
SIRT2	Q8IXJ6	NAD-dependent protein deacetylase sirtuin-2	-1.55704	down	Yes
MRPL12	P52815	39S ribosomal protein L12, mitochondrial	-1.61077	down	Yes
NDUFV1	P49821	NADH dehydrogenase [ubiquinone] flavoprotein 1, mitochondrial	-1.61218	down	Yes
CAPZB	P47756	F-actin-capping protein subunit beta	-1.6144	down	Yes
SKP1	P63208	S-phase kinase-associated protein 1	-1.61889	down	Yes
ILF2	Q12905	Interleukin enhancer-binding factor 2	-1.62417	down	Yes
QDPR	P09417	Dihydropteridine reductase	-1.62534	down	Yes
ARPC5L	Q9BPX5	Actin-related protein 2/3 complex subunit 5-like protein	-1.63673	down	Yes
PDHA1	P08559	Pyruvate dehydrogenase E1 component subunit alpha, somatic form, mitochondrial	-1.63726	down	Yes
NDUFB7	P17568	NADH dehydrogenase [ubiquinone] 1 beta subcomplex subunit 7	-1.63915	down	Yes
AGL	P35573	Glycogen debranching enzyme;4-alpha-glucanotransferase;Amylo-alpha-1,6-glucosidase	-1.65697	down	Yes
PABPC1	P11940	Polyadenylate-binding protein 1;Polyadenylate-binding protein 3	-1.66366	down	Yes
DLST	P36957	Dihydrolipoyllysine-residue succinyltransferase component of 2-oxoglutarate dehydrogenase complex, mitochondrial	-1.664	down	Yes
PAICS	P22234	Multifunctional protein ADE2;Phosphoribosylaminoimidazole-succinocarboxamide synthase;Phosphoribosylaminoimidazole carboxylase	-1.68222	down	Yes
ALDH2	P05091	Aldehyde dehydrogenase, mitochondrial	-1.68842	down	Yes
GPHN	Q9NQX3	Gephyrin;Molybdopterin adenylyltransferase;Molybdopterin molybdenumtransferase	-1.70265	down	Yes
GRHPR	Q9UBQ7	Glyoxylate reductase/hydroxypyruvate reductase	-1.7235	down	Yes
ACO2	Q99798	Aconitate hydratase, mitochondrial	-1.72367	down	Yes
UQCRB	P14927	Cytochrome b-c1 complex subunit 7	-1.7253	down	Yes
TPT1	P13693	Translationally-controlled tumor protein	-1.73252	down	Yes
CCT4	P50991	T-complex protein 1 subunit delta	-1.73411	down	Yes
SNCA	P37840	Alpha-synuclein	-1.73816	down	Yes
CRAT	P43155	Carnitine O-acetyltransferase	-1.74613	down	Yes
PCMT1	P22061	Protein-L-isoaspartate(D-aspartate) O-methyltransferase	-1.76256	down	Yes
FABP3	P05413	Fatty acid-binding protein, heart	-1.77939	down	Yes
CDC37	Q16543	Hsp90 co-chaperone Cdc37;Hsp90 co-chaperone Cdc37, N-terminally processed	-1.80322	down	Yes
ACOT9	Q9Y305	Acyl-coenzyme A thioesterase 9, mitochondrial	-1.81369	down	Yes
PREPL	Q4J6C6	Prolyl endopeptidase-like	-1.81553	down	Yes
MYO6	Q9UM54	Unconventional myosin-VI	-1.83009	down	Yes
CRYM	Q14894	Ketimine reductase mu-crystallin	-1.85118	down	Yes
PEBP1	P30086	Phosphatidylethanolamine-binding protein 1;Hippocampal cholinergic neurostimulating peptide	-1.86834	down	Yes
SEPT4	O43236	Septin-4	-1.86999	down	Yes
ADH5	P11766	Alcohol dehydrogenase class-3	-1.87361	down	Yes
CAPZA1	P52907	F-actin-capping protein subunit alpha-1	-1.87855	down	Yes
CFL2	Q9Y281	Cofilin-2	-1.89254	down	Yes
TPM4	P67936	Tropomyosin alpha-4 chain	-1.89483	down	Yes
CCT8	P50990	T-complex protein 1 subunit theta	-1.89507	down	Yes
AKR7A2	O43488	Aflatoxin B1 aldehyde reductase member 2	-1.91053	down	Yes
ATP6V1B2	P21281	V-type proton ATPase subunit B, brain isoform	-1.91217	down	Yes
COTL1	Q14019	Coactosin-like protein	-1.91522	down	Yes
AK3	Q9UIJ7	GTP:AMP phosphotransferase AK3, mitochondrial	-1.91824	down	Yes
SLC4A4	Q9Y6R1	Electrogenic sodium bicarbonate cotransporter 1	-1.92019	down	Yes
LGI1	O95970	Leucine-rich glioma-inactivated protein 1	-1.92845	down	Yes
TPM3	P06753	Tropomyosin alpha-3 chain	-1.93198	down	Yes
PPP3CA	Q08209	Serine/threonine-protein phosphatase 2B catalytic subunit alpha isoform	-1.93374	down	Yes
NDUFS4	O43181	NADH dehydrogenase [ubiquinone] iron-sulfur protein 4, mitochondrial	-1.94178	down	Yes
PPP1R7	Q15435	Protein phosphatase 1 regulatory subunit 7	-1.94186	down	Yes
HPRT1	P00492	Hypoxanthine-guanine phosphoribosyltransferase	-1.95271	down	Yes
GLUD1	P00367	Glutamate dehydrogenase 1, mitochondrial;Glutamate dehydrogenase 2, mitochondrial	-2.00573	down	Yes
CTBP1	Q13363	C-terminal-binding protein 1	-2.05058	down	Yes
HSD17B10	Q99714	3-hydroxyacyl-CoA dehydrogenase type-2	-2.0654	down	Yes
MAG	P20916	Myelin-associated glycoprotein	-2.0821	down	Yes
SNCB	Q16143	Beta-synuclein	-2.0824	down	Yes
CYCS	P99999	Cytochrome c	-2.14118	down	Yes
PARK7	Q99497	Protein deglycase DJ-1	-2.16537	down	Yes
PPP3R1	P63098	Calcineurin subunit B type 1	-2.17435	down	Yes
ENO2	P09104	Gamma-enolase	-2.20368	down	Yes
ALDH9A1	P49189	4-trimethylaminobutyraldehyde dehydrogenase	-2.23786	down	Yes
NDRG2	Q9UN36	Protein NDRG2	-2.24116	down	Yes
ST13	P50502	Hsc70-interacting protein;Putative protein FAM10A5;Putative protein FAM10A4	-2.25495	down	Yes
VAT1L	Q9HCJ6	Synaptic vesicle membrane protein VAT-1 homolog-like	-2.27837	down	Yes
ALDOA	P04075	Fructose-bisphosphate aldolase A	-2.29011	down	Yes
ALDH5A1	P51649	Succinate-semialdehyde dehydrogenase, mitochondrial	-2.34807	down	Yes
SKIV2L	Q15477	Helicase SKI2W	-2.34982	down	Yes
DPYSL3	Q14195	Dihydropyrimidinase-related protein 3	-2.35801	down	Yes
HSPA2	P54652	Heat shock-related 70 kDa protein 2	-2.36482	down	Yes
MARCKS	P29966	Myristoylated alanine-rich C-kinase substrate	-2.39517	down	Yes
DECR1	Q16698	2,4-dienoyl-CoA reductase, mitochondrial	-2.42376	down	Yes
STIP1	P31948	Stress-induced-phosphoprotein 1	-2.46328	down	Yes
ACOT7	O00154	Cytosolic acyl coenzyme A thioester hydrolase	-2.48118	down	Yes
AGK	Q53H12	Acylglycerol kinase, mitochondrial	-2.48356	down	Yes
CALB2	P22676	Calretinin	-2.4845	down	Yes
PKM	P14618	Pyruvate kinase PKM	-2.50585	down	Yes
TPM1	P09493	Tropomyosin alpha-1 chain	-2.52503	down	Yes
EZR	P15311	Ezrin	-2.55904	down	Yes
SLC1A3	P43003	Excitatory amino acid transporter 1	-2.55977	down	Yes
GDA	Q9Y2T3	Guanine deaminase	-2.56396	down	Yes
ABHD10	Q9NUJ1	Mycophenolic acid acyl-glucuronide esterase, mitochondrial	-2.65089	down	Yes
CA2	P00918	Carbonic anhydrase 2	-2.66807	down	Yes
ELMO2	Q96JJ3	Engulfment and cell motility protein 2	-2.68673	down	Yes
SLC1A2	P43004	Excitatory amino acid transporter 2	-2.70772	down	Yes
ECHS1	P30084	Enoyl-CoA hydratase, mitochondrial	-2.73607	down	Yes
OXR1	Q8N573	Oxidation resistance protein 1	-2.82607	down	Yes
PPP2R5A	Q15172	Serine/threonine-protein phosphatase 2A 56 kDa regulatory subunit alpha isoform	-2.84912	down	Yes
SGIP1	Q9BQI5	SH3-containing GRB2-like protein 3-interacting protein 1	-2.94328	down	Yes
DDB1	Q16531	DNA damage-binding protein 1	-3.03701	down	Yes
LRRC16A	Q5VZK9	Leucine-rich repeat-containing protein 16A	-3.05462	down	Yes
SELENBP1	Q13228	Selenium-binding protein 1	-3.07005	down	Yes
ALDH4A1	P30038	Delta-1-pyrroline-5-carboxylate dehydrogenase, mitochondrial	-3.11413	down	Yes
GHITM	Q9H3K2	Growth hormone-inducible transmembrane protein	-3.19241	down	Yes
S100A1	P23297	Protein S100-A1	-3.19844	down	Yes
SCN1A	P35498	Sodium channel protein type 1 subunit alpha	-3.22668	down	Yes
HDAC11	Q96DB2	Histone deacetylase 11	-3.22887	down	Yes
NPLOC4	Q8TAT6	Nuclear protein localization protein 4 homolog	-3.25044	down	Yes
SERPINB9	P50453	Serpin B9	-3.26238	down	Yes
SNCG	O76070	Gamma-synuclein	-3.2851	down	Yes
PMP2	P02689	Myelin P2 protein	-3.35623	down	Yes
LGI4	Q8N135	Leucine-rich repeat LGI family member 4	-3.3576	down	Yes
ALDOC	P09972	Fructose-bisphosphate aldolase C	-3.39984	down	Yes
TMEM33	P57088	Transmembrane protein 33	-3.40489	down	Yes
LRRC8A	Q8IWT6	Volume-regulated anion channel subunit LRRC8A	-3.41839	down	Yes
SLC9A3R1	O14745	Na(+)/H(+) exchange regulatory cofactor NHE-RF1	-3.44899	down	Yes
FBXL18	Q96ME1	F-box/LRR-repeat protein 18	-3.48619	down	Yes
GMPPA	Q96IJ6	Mannose-1-phosphate guanyltransferase alpha	-3.49099	down	Yes
PRDX6	P30041	Peroxiredoxin-6	-3.55305	down	Yes
TMEM126A	Q9H061	Transmembrane protein 126A	-3.55722	down	Yes
PTCD3	Q96EY7	Pentatricopeptide repeat domain-containing protein 3, mitochondrial	-3.56765	down	Yes
ARRB1	P49407	Beta-arrestin-1	-3.64993	down	Yes
ATP6V1G1	O75348	V-type proton ATPase subunit G 1	-3.65239	down	Yes
HSPE1	P61604	10 kDa heat shock protein, mitochondrial	-3.66101	down	Yes
GABRG2	P18507	Gamma-aminobutyric acid receptor subunit gamma-2;Gamma-aminobutyric acid receptor subunit gamma-1	-3.67886	down	Yes
MRPL49	Q13405	39S ribosomal protein L49, mitochondrial	-3.68365	down	Yes
RABL6	Q3YEC7	Rab-like protein 6	-3.69696	down	Yes
SLC25A18	Q9H1K4	Mitochondrial glutamate carrier 2	-3.70037	down	Yes
AHCYL1	O43865	Putative adenosylhomocysteinase 2	-3.70053	down	Yes
ATP1B3	P54709	Sodium/potassium-transporting ATPase subunit beta-3	-3.71308	down	Yes
KCNA1	Q09470	Potassium voltage-gated channel subfamily A member 1	-3.71539	down	Yes
SRI	P30626	Sorcin	-3.74846	down	Yes
CRYZ	Q08257	Quinone oxidoreductase	-3.75819	down	Yes
PGP	A6NDG6	Phosphoglycolate phosphatase	-3.80657	down	Yes
GNG13	Q9P2W3	Guanine nucleotide-binding protein G(I)/G(S)/G(O) subunit gamma-13	-3.81222	down	Yes
OPALIN	Q96PE5	Opalin	-3.81704	down	Yes
APEH	P13798	Acylamino-acid-releasing enzyme	-3.82097	down	Yes
AGT	P01019	Angiotensinogen;Angiotensin-1;Angiotensin-2;Angiotensin-3;Angiotensin-4;Angiotensin 1-9;Angiotensin 1-7;Angiotensin 1-5;Angiotensin 1-4	-3.84973	down	Yes
GAMT	Q14353	Guanidinoacetate N-methyltransferase	-3.88997	down	Yes
FAIM2	Q9BWQ8	Protein lifeguard 2	-3.90827	down	Yes
DENR	O43583	Density-regulated protein	-3.98671	down	Yes
SPR	P35270	Sepiapterin reductase	-4.00389	down	Yes
FAM98B	Q52LJ0	Protein FAM98B	-4.00462	down	Yes
NADK2	Q4G0N4	NAD kinase 2, mitochondrial	-4.0211	down	Yes
PSME1	Q06323	Proteasome activator complex subunit 1	-4.02647	down	Yes
HCN2	Q9UL51	Potassium/sodium hyperpolarization-activated cyclic nucleotide-gated channel 2	-4.04159	down	Yes
AHCY	P23526	Adenosylhomocysteinase	-4.05072	down	Yes
MRPS27	Q92552	28S ribosomal protein S27, mitochondrial	-4.06277	down	Yes
DAAM2	Q86T65	Disheveled-associated activator of morphogenesis 2	-4.08981	down	Yes
PSMB7	Q99436	Proteasome subunit beta type-7	-4.13363	down	Yes
MTX2	O75431	Metaxin-2	-4.17421	down	Yes
SMAP1	Q8IYB5	Stromal membrane-associated protein 1	-4.19398	down	Yes
HNMT	P50135	Histamine N-methyltransferase	-4.19729	down	Yes
GATM	P50440	Glycine amidinotransferase, mitochondrial	-4.22753	down	Yes
ECHDC1	Q9NTX5	Ethylmalonyl-CoA decarboxylase	-4.23121	down	Yes
PNP	P00491	Purine nucleoside phosphorylase	-4.23475	down	Yes
EIF2S3	P41091	Eukaryotic translation initiation factor 2 subunit 3;Putative eukaryotic translation initiation factor 2 subunit 3-like protein	-4.23705	down	Yes
GCA	P28676	Grancalcin	-4.24394	down	Yes
ARPC5	O15511	Actin-related protein 2/3 complex subunit 5	-4.25066	down	Yes
LCMT1	Q9UIC8	Leucine carboxyl methyltransferase 1	-4.33352	down	Yes
MPI	P34949	Mannose-6-phosphate isomerase	-4.36092	down	Yes
SH3BGRL	O75368	SH3 domain-binding glutamic acid-rich-like protein	-4.3616	down	Yes
SCG3	Q8WXD2	Secretogranin-3	-4.36898	down	Yes
PREX1	Q8TCU6	Phosphatidylinositol 3,4,5-trisphosphate-dependent Rac exchanger 1 protein	-4.3757	down	Yes
CUTA	O60888	Protein CutA	-4.38748	down	Yes
NUDT3	O95989	Diphosphoinositol polyphosphate phosphohydrolase 1	-4.40958	down	Yes
SSR4	P51571	Translocon-associated protein subunit delta	-4.44187	down	Yes
MT-ND1	P03886	NADH-ubiquinone oxidoreductase chain 1	-4.47932	down	Yes
IDH3G	P51553	Isocitrate dehydrogenase [NAD] subunit gamma, mitochondrial	-4.48023	down	Yes
EPHX2	P34913	Bifunctional epoxide hydrolase 2;Cytosolic epoxide hydrolase 2;Lipid-phosphate phosphatase	-4.51534	down	Yes
HDHD1	Q08623	Pseudouridine-5-phosphatase	-4.52132	down	Yes
CRYZL1	O95825	Quinone oxidoreductase-like protein 1	-4.52639	down	Yes
BASP1	P80723	Brain acid soluble protein 1	-4.54435	down	Yes
NAPEPLD	Q6IQ20	N-acyl-phosphatidylethanolamine-hydrolyzing phospholipase D	-4.54769	down	Yes
RDX	P35241	Radixin	-4.56009	down	Yes
CHORDC1	Q9UHD1	Cysteine and histidine-rich domain-containing protein 1	-4.58336	down	Yes
SERPINF1	P36955	Pigment epithelium-derived factor	-4.5959	down	Yes
ELMO1	Q92556	Engulfment and cell motility protein 1	-4.61423	down	Yes
ALDH7A1	P49419	Alpha-aminoadipic semialdehyde dehydrogenase	-4.63081	down	Yes
FNBP1	Q96RU3	Formin-binding protein 1	-4.659	down	Yes
PGAM5	Q96HS1	Serine/threonine-protein phosphatase PGAM5, mitochondrial	-4.81345	down	Yes
VBP1	P61758	Prefoldin subunit 3	-4.82928	down	Yes
L2HGDH	Q9H9P8	L-2-hydroxyglutarate dehydrogenase, mitochondrial	-4.8467	down	Yes
HIBADH	P31937	3-hydroxyisobutyrate dehydrogenase, mitochondrial	-4.86979	down	Yes
ACAT2	Q9BWD1	Acetyl-CoA acetyltransferase, cytosolic	-4.92071	down	Yes
BCKDK	O14874	[3-methyl-2-oxobutanoate dehydrogenase [lipoamide]] kinase, mitochondrial	-4.92733	down	Yes
ZFYVE21	Q9BQ24	Zinc finger FYVE domain-containing protein 21	-4.96726	down	Yes
HSD17B8	Q92506	Estradiol 17-beta-dehydrogenase 8	-4.99274	down	Yes
SERPINI1	Q99574	Neuroserpin	-4.9945	down	Yes
SLC27A1	Q6PCB7	Long-chain fatty acid transport protein 1	-4.99614	down	Yes
CSRP1	P21291	Cysteine and glycine-rich protein 1	-5.04182	down	Yes
TIMM13	Q9Y5L4	Mitochondrial import inner membrane translocase subunit Tim13	-5.06675	down	Yes
LGI3	Q8N145	Leucine-rich repeat LGI family member 3	-5.1467	down	Yes
JAM3	Q9BX67	Junctional adhesion molecule C	-5.15006	down	Yes
GRB2	P62993	Growth factor receptor-bound protein 2	-5.1828	down	Yes
PADI2	Q9Y2J8	Protein-arginine deiminase type-2	-5.22479	down	Yes
TF	P02787	Serotransferrin	-5.2973	down	Yes
ERMN	Q8TAM6	Ermin	-5.31922	down	Yes
ALDH1A1	P00352	Retinal dehydrogenase 1	-5.33978	down	Yes
METTL7A	Q9H8H3	Methyltransferase-like protein 7A	-5.3469	down	Yes
NUCKS1	Q9H1E3	Nuclear ubiquitous casein and cyclin-dependent kinase substrate 1	-5.41322	down	Yes
PPP1R1B	Q9UD71	Protein phosphatase 1 regulatory subunit 1B	-5.48308	down	Yes
MRPS36	P82909	28S ribosomal protein S36, mitochondrial	-5.54412	down	Yes
FECH	P22830	Ferrochelatase, mitochondrial	-5.63673	down	Yes
S100B	P04271	Protein S100-B	-5.63831	down	Yes
TPP1	O14773	Tripeptidyl-peptidase 1	-5.75637	down	Yes
SYT2	Q8N9I0	Synaptotagmin-2	-5.83348	down	Yes
PTGDS	P41222	Prostaglandin-H2 D-isomerase	-5.85322	down	Yes
DBI	P07108	Acyl-CoA-binding protein	-5.87626	down	Yes
PRMT5	O14744	Protein arginine N-methyltransferase 5;Protein arginine N-methyltransferase 5, N-terminally processed	-5.88789	down	Yes
CST3	P01034	Cystatin-C	-6.04728	down	Yes
GYG1	P46976	Glycogenin-1	-6.38574	down	Yes
GJA1	P17302	Gap junction alpha-1 protein	-6.43822	down	Yes
GLUL	P15104	Glutamine synthetase	-7.81539	down	Yes
MTMR9	Q96QG7	Myotubularin-related protein 9	4.76389	up	No
NID1	P14543	Nidogen-1	3.96472	up	No
BOLA2	Q9H3K6	BolA-like protein 2	3.93813	up	No
RAB11FIP2	Q7L804	Rab11 family-interacting protein 2	3.82607	up	No
BAI2	O60241	Brain-specific angiogenesis inhibitor 2	3.37598	up	No
RBSN	Q9H1K0	Rabenosyn-5	3.32946	up	No
PAFAH1B3	Q15102	Platelet-activating factor acetylhydrolase IB subunit gamma	2.04803	up	No
VWA1	Q6PCB0	von Willebrand factor A domain-containing protein 1	1.96631	up	No
CCDC177	Q9NQR7	Coiled-coil domain-containing protein 177	1.844	up	No
KIAA1217	Q5T5P2	Sickle tail protein homolog	1.66961	up	No
AGAP2	Q99490	Arf-GAP with GTPase, ANK repeat and PH domain-containing protein 2	1.61158	up	No
NARS	O43776	Asparagine--tRNA ligase, cytoplasmic	-2.1955	down	No
AHNAK2	Q8IVF2	Protein AHNAK2	-2.30416	down	No
HECTD3	Q5T447	E3 ubiquitin-protein ligase HECTD3	-2.50616	down	No
PNPLA8	Q9NP80	Calcium-independent phospholipase A2-gamma	-3.00061	down	No
STX8	Q9UNK0	Syntaxin-8	-3.19736	down	No
CEP41	Q9BYV8	Centrosomal protein of 41 kDa	-3.19856	down	No
GFOD1	Q9NXC2	Glucose-fructose oxidoreductase domain-containing protein 1	-3.37561	down	No
C16orf70	Q9BSU1	UPF0183 protein C16orf70	-3.532	down	No
CYB5R2	Q6BCY4	NADH-cytochrome b5 reductase 2	-3.9091	down	No
HERC4	Q5GLZ8	Probable E3 ubiquitin-protein ligase HERC4	-3.92182	down	No
MXRA7	P84157	Matrix-remodeling-associated protein 7	-3.9433	down	No
OGFRL1	Q5TC84	Opioid growth factor receptor-like protein 1	-4.03897	down	No
ASRGL1	Q7L266	Isoaspartyl peptidase/L-asparaginase;Isoaspartyl peptidase/L-asparaginase alpha chain;Isoaspartyl peptidase/L-asparaginase beta chain	-4.12091	down	No
CCDC92	Q53HC0	Coiled-coil domain-containing protein 92	-4.25068	down	No
CHMP3	Q9Y3E7	Charged multivesicular body protein 3	-4.29587	down	No
GLTP	Q9NZD2	Glycolipid transfer protein	-4.48644	down	No
FAM175B	Q15018	BRISC complex subunit Abro1	-4.49912	down	No
EML2	O95834	Echinoderm microtubule-associated protein-like 2	-4.84887	down	No
LZIC	Q8WZA0	Protein LZIC	-4.93857	down	No
FHL1	Q13642	Four and a half LIM domains protein 1	-5.26284	down	No
BROX	Q5VW32	BRO1 domain-containing protein BROX	-5.51758	down	No
NIPSNAP3A	Q9UFN0	Protein NipSnap homolog 3A	-6.3766	down	No
HRSP12	P52758	Ribonuclease UK114	-6.71445	down	No

## Sheet: Table S5B
Category	Term name	Description	No. background proteins	Number of proteins	adj. p-value	-Log10(adj. p-value)	Proteins	Nodes
GO Biological Process	GO:0055114	Oxidation-reduction process	939	53	1.03e-16	15.9872	HSD17B10|NDUFB7|ACO2|ACOT8|IDH3G|CRYM|DECR1|ALDOC|SPR|AKR7A2|COX6B1|ALDH2|HIBADH|L2HGDH|GLUD1|QDPR|CTBP1|AGL|ADH5|NDUFS4|ALDH1A1|VAT1L|CYCS|GRHPR|ALDH5A1|CRAT|PKM|NDUFV1|NDUFV2|SLC25A18|DLST|SNCA|GYG1|PRDX6|ALDH9A1|MT-ND1|ACAT2|ECHS1|HSD17B8|ALDH4A1|PDHA1|CRYZL1|ALDOA|TXNRD2|ALDH7A1|SELENBP1|CRYZ|OXR1|GPHN|PARK7|UQCRB|ECHDC1|ENO2	417|558|978|921|1047|525|1101|759|831|522|798|999|813|573|963|396|705|1083|423|954|1011|357|1068|993|792|411|1026|327|933|636|1017|453|591|471|666|678|960|405|333|720|660|942|858|912|783|651|828|819|909|1023|378|345|549
GO Biological Process	GO:0044281	Small molecule metabolic process	1684	65	1.52e-13	12.8182	HSD17B10|ACO2|PCK2|AHCY|ACOT8|IDH3G|CRYM|DECR1|NAMPT|ALDOC|SPR|AKR7A2|GDA|SLC27A1|MRPS36|ALDH2|SLC1A3|HIBADH|L2HGDH|ABHD10|GLUD1|HNMT|QDPR|CA2|ADH5|ALDH1A1|HPRT1|GLUL|GRHPR|ALDH5A1|CRAT|MPI|PKM|PGP|LRRC16A|DLST|ACSL4|PNP|ACAT2|ECHS1|AHCYL1|PTGDS|FABP3|HSD17B8|ALDH4A1|ACOT7|ACOT9|PDHA1|CRYZL1|AK3|NADK2|BCKDK|ALDOA|GATM|PAICS|ALDH7A1|HDHD1|GAMT|NAPEPLD|PARK7|EPHX2|ECHDC1|ENO2|DBI|NUDT3	417|978|585|777|921|1047|525|1101|744|759|831|522|822|429|834|999|663|813|573|699|963|894|396|945|423|1011|804|876|993|792|411|951|1026|780|1014|1017|501|849|960|405|627|702|465|333|720|723|687|660|942|846|900|750|858|867|684|783|1050|339|672|1023|492|345|549|534|330
GO Biological Process	GO:0044282	Small molecule catabolic process	424	32	2.15e-12	11.6676	HSD17B10|PCK2|AHCY|ACOT8|CRYM|DECR1|ALDOC|ALDH2|HIBADH|ABHD10|GLUD1|HNMT|QDPR|ADH5|ALDH1A1|HPRT1|GLUL|ALDH5A1|CRAT|PKM|DLST|PNP|ACAT2|ECHS1|ALDH4A1|BCKDK|ALDOA|ALDH7A1|PARK7|ECHDC1|ENO2|NUDT3	417|585|777|921|525|1101|759|999|813|699|963|894|396|423|1011|804|876|792|411|1026|1017|849|960|405|720|750|858|783|1023|345|549|330
GO Biological Process	GO:0019752	Carboxylic acid metabolic process	853	43	9.95e-12	11.0022	HSD17B10|ACO2|PCK2|AHCY|ACOT8|IDH3G|CRYM|DECR1|ALDOC|SLC27A1|MRPS36|SLC1A3|HIBADH|L2HGDH|ABHD10|GLUD1|HNMT|QDPR|ADH5|GLUL|GRHPR|ALDH5A1|CRAT|PKM|DLST|ACSL4|ACAT2|ECHS1|PTGDS|FABP3|HSD17B8|ALDH4A1|ACOT7|PDHA1|BCKDK|ALDOA|GATM|ALDH7A1|GAMT|PARK7|EPHX2|ECHDC1|ENO2	417|978|585|777|921|1047|525|1101|759|429|834|663|813|573|699|963|894|396|423|876|993|792|411|1026|1017|501|960|405|702|465|333|720|723|660|750|858|867|783|339|1023|492|345|549
GO Biological Process	GO:0006082	Organic acid metabolic process	964	45	2.35e-11	10.6289	HSD17B10|ACO2|PCK2|AHCY|ACOT8|IDH3G|CRYM|DECR1|ALDOC|SLC27A1|MRPS36|SLC1A3|HIBADH|L2HGDH|ABHD10|GLUD1|HNMT|QDPR|ADH5|GLUL|GRHPR|ALDH5A1|CRAT|PKM|LRRC16A|DLST|ACSL4|PNP|ACAT2|ECHS1|PTGDS|FABP3|HSD17B8|ALDH4A1|ACOT7|PDHA1|BCKDK|ALDOA|GATM|ALDH7A1|GAMT|PARK7|EPHX2|ECHDC1|ENO2	417|978|585|777|921|1047|525|1101|759|429|834|663|813|573|699|963|894|396|423|876|993|792|411|1026|1014|1017|501|849|960|405|702|465|333|720|723|660|750|858|867|783|339|1023|492|345|549
GO Biological Process	GO:0009987	Cellular process	15024	222	1.18e-10	9.92812	HSD17B10|NDUFB7|TIMM13|ST13|ACO2|PCK2|AHCY|ACOT8|IDH3G|CRYM|SCG3|DECR1|CDC37|PIK3R2|NAMPT|ALDOC|SKP1|HSPE1|PPP3R1|SPR|AKR7A2|GDA|COX6B1|GNG13|SIRT2|MTX2|HCN2|SLC27A1|EIF2S3|PPP1R1B|PTCD3|SERPINF1|PMP2|MRPS36|LRRC8A|PSMB7|PEBP1|PPP2R5A|SLC7A5|ALDH2|SLC4A1|COTL1|SLC9A3R1|CAPZA1|SLC1A3|TNC|HIBADH|SRI|L2HGDH|ABHD10|NONO|ATP6V1B2|GLUD1|SLC1A2|MRPL49|HNMT|DENR|QDPR|TMEM163|GJA1|CA2|ATP1B3|VBP1|CCT8|ELM…	417|558|588|816|978|585|777|921|1047|525|624|1101|1005|966|744|759|642|570|714|831|522|822|798|690|969|516|318|429|561|915|918|771|768|834|486|351|654|837|459|999|540|579|366|612|663|528|813|741|573|699|1077|546|963|1080|1056|894|789|396|408|444|945|426|747|717|729|705|531|375|1083|765|552|645|423|1020|954|1011|414|804|321|510|600|450|474|885|315|456|1068|876|987|801|582|630|639|993|792|411|951|3…
GO Biological Process	GO:0065008	Regulation of biological quality	4042	96	2.88e-09	8.54061	PCK2|CRYM|DECR1|CDC37|PIK3R2|NAMPT|SKP1|PPP3R1|HCN2|SLC27A1|EIF2S3|PPP1R1B|SERPINF1|LRRC8A|PSMB7|SLC4A1|COTL1|SLC9A3R1|CAPZA1|SLC1A3|SRI|ATP6V1B2|GLUD1|SLC1A2|HNMT|GJA1|CA2|ATP1B3|CCT8|S100B|ARPC5|ADH5|ALDH1A1|CFL2|JAM3|TPP1|TERF2IP|DDB1|SCN1A|CALB2|GLUL|DPYSL2|PABPC1|ALDH5A1|LRRC16A|SNCA|ACSL4|PRDX6|ARPC5L|HNRNPA2B1|ALDH9A1|ACTB|TPM1|AGT|EZR|NUCKS1|SYT2|CSRP1|RAP1A|SMAP1|SGIP1|LGI1|PREX1|SNCG|FA…	585|525|1101|1005|966|744|642|714|318|429|561|915|771|486|351|540|579|366|612|663|741|546|963|1080|894|444|945|426|717|531|765|423|1011|414|321|510|600|450|885|456|876|801|639|792|1014|453|501|471|981|984|666|975|852|843|807|1074|1059|873|498|840|468|882|1062|648|465|732|333|846|384|402|1053|738|348|870|750|858|867|306|912|342|477|633|381|576|657|672|855|399|909|1023|492|1008|447|957|555|708
GO Biological Process	GO:0044237	Cellular metabolic process	7513	142	8.87e-09	8.05208	HSD17B10|NDUFB7|ACO2|PCK2|AHCY|ACOT8|IDH3G|CRYM|SCG3|DECR1|PIK3R2|NAMPT|ALDOC|SKP1|PPP3R1|SPR|AKR7A2|GDA|COX6B1|SIRT2|SLC27A1|EIF2S3|PPP1R1B|PTCD3|MRPS36|LRRC8A|PSMB7|PEBP1|PPP2R5A|ALDH2|SLC1A3|TNC|HIBADH|L2HGDH|ABHD10|NONO|GLUD1|MRPL49|HNMT|DENR|QDPR|CA2|CTBP1|AGL|HDAC11|ADH5|APEH|NDUFS4|ALDH1A1|HPRT1|TPP1|TERF2IP|DDB1|CYCS|GLUL|SNCB|DPYSL2|PABPC1|GRHPR|ALDH5A1|CRAT|MPI|PRMT5|PKM|NDUFV1|NDUFV2|S…	417|558|978|585|777|921|1047|525|624|1101|966|744|759|642|714|831|522|822|798|969|429|561|915|918|834|486|351|654|837|999|663|528|813|573|699|1077|963|1056|894|789|396|945|705|1083|552|423|1020|954|1011|804|510|600|450|1068|876|987|801|639|993|792|411|951|363|1026|327|933|636|780|504|1014|879|1017|453|501|591|471|984|666|762|975|849|678|309|843|960|807|1074|1071|405|627|462|693|702|1062|354|465|3…
GO Biological Process	GO:0006091	Generation of precursor metabolites and energy	405	26	1.35e-08	7.86967	NDUFB7|ACO2|IDH3G|ALDOC|AKR7A2|COX6B1|ALDH2|QDPR|AGL|ADH5|NDUFS4|ALDH1A1|CYCS|PKM|NDUFV1|NDUFV2|SLC25A18|DLST|GYG1|MT-ND1|ALDH4A1|PDHA1|FECH|ALDOA|UQCRB|ENO2	558|978|1047|759|522|798|999|396|1083|423|954|1011|1068|1026|327|933|636|1017|591|678|720|660|825|858|378|549
GO Biological Process	GO:0046395	Carboxylic acid catabolic process	260	21	2.54e-08	7.59517	HSD17B10|PCK2|AHCY|ACOT8|CRYM|DECR1|HIBADH|ABHD10|GLUD1|HNMT|QDPR|GLUL|ALDH5A1|CRAT|DLST|ACAT2|ECHS1|ALDH4A1|BCKDK|ALDH7A1|ECHDC1	417|585|777|921|525|1101|813|699|963|894|396|876|792|411|1017|960|405|720|750|783|345
GO Biological Process	GO:0008152	Metabolic process	8298	150	2.55e-08	7.59346	HSD17B10|NDUFB7|ACO2|PCK2|AHCY|ACOT8|IDH3G|CRYM|SCG3|DECR1|PIK3R2|NAMPT|ALDOC|SKP1|PPP3R1|SPR|AKR7A2|GDA|COX6B1|SIRT2|SLC27A1|EIF2S3|PPP1R1B|PTCD3|MRPS36|LRRC8A|PSMB7|PEBP1|PPP2R5A|ALDH2|SLC1A3|TNC|HIBADH|L2HGDH|ABHD10|NONO|ATP6V1B2|GLUD1|MRPL49|HNMT|DENR|QDPR|CA2|CTBP1|AGL|HDAC11|ADH5|APEH|NDUFS4|ALDH1A1|HPRT1|TPP1|TERF2IP|DDB1|VAT1L|CYCS|GLUL|SNCB|DPYSL2|PABPC1|GRHPR|ALDH5A1|CRAT|MPI|PRMT5|PKM|…	417|558|978|585|777|921|1047|525|624|1101|966|744|759|642|714|831|522|822|798|969|429|561|915|918|834|486|351|654|837|999|663|528|813|573|699|1077|546|963|1056|894|789|396|945|705|1083|552|423|1020|954|1011|804|510|600|450|357|1068|876|987|801|639|993|792|411|951|363|1026|327|933|636|780|504|1014|879|1017|453|501|591|471|984|666|762|975|990|849|678|309|843|960|807|1074|1071|405|627|462|693|702|10…
GO Biological Process	GO:0016043	Cellular component organization	5447	113	3.28e-08	7.48413	HSD17B10|NDUFB7|TIMM13|ST13|ACOT8|SKP1|PPP3R1|SIRT2|MTX2|EIF2S3|PTCD3|PMP2|MRPS36|LRRC8A|SLC4A1|COTL1|SLC9A3R1|CAPZA1|TNC|ATP6V1B2|SLC1A2|MRPL49|DENR|GJA1|VBP1|CCT8|ELMO2|CTBP1|S100B|ARPC5|HDAC11|APEH|NDUFS4|CFL2|HPRT1|JAM3|TPP1|TERF2IP|DDB1|TMEM126A|CYCS|SNCB|DPYSL2|ELMO1|CRAT|PRMT5|CHORDC1|NDUFV1|NDUFV2|NPLOC4|LRRC16A|MRPL12|SYNM|SNCA|ACSL4|DPYSL3|TPM4|ARPC5L|HNRNPA2B1|ALDH9A1|AGK|ACTB|TPM1|MT-…	417|558|588|816|921|642|714|969|516|561|918|768|834|486|540|579|366|612|528|546|1080|1056|789|444|747|717|729|705|531|765|552|1020|954|414|804|321|510|600|450|315|1068|987|801|582|411|363|564|327|933|504|1014|879|996|453|501|609|1029|981|984|666|762|975|852|678|843|807|1074|1059|906|873|495|372|462|468|882|693|1062|648|354|732|333|1089|384|1053|738|594|858|927|306|438|1086|342|477|633|603|390|828…
GO Biological Process	GO:0032787	Monocarboxylic acid metabolic process	515	28	5.53e-08	7.25727	PCK2|ACOT8|DECR1|ALDOC|SLC27A1|SLC1A3|ABHD10|ADH5|GRHPR|ALDH5A1|CRAT|PKM|ACSL4|ACAT2|ECHS1|PTGDS|FABP3|HSD17B8|ALDH4A1|ACOT7|PDHA1|ALDOA|GATM|GAMT|PARK7|EPHX2|ECHDC1|ENO2	585|921|1101|759|429|663|699|423|993|792|411|1026|501|960|405|702|465|333|720|723|660|858|867|339|1023|492|345|549
GO Biological Process	GO:0071840	Cellular component organization or biogenesis	5633	114	1.1e-07	6.95861	HSD17B10|NDUFB7|TIMM13|ST13|ACOT8|SKP1|PPP3R1|SIRT2|MTX2|EIF2S3|PTCD3|PMP2|MRPS36|LRRC8A|SLC4A1|COTL1|SLC9A3R1|CAPZA1|TNC|ATP6V1B2|SLC1A2|MRPL49|DENR|GJA1|VBP1|CCT8|ELMO2|CTBP1|S100B|ARPC5|HDAC11|APEH|NDUFS4|CFL2|HPRT1|JAM3|TPP1|TERF2IP|DDB1|TMEM126A|CYCS|GLUL|SNCB|DPYSL2|ELMO1|CRAT|PRMT5|CHORDC1|NDUFV1|NDUFV2|NPLOC4|LRRC16A|MRPL12|SYNM|SNCA|ACSL4|DPYSL3|TPM4|ARPC5L|HNRNPA2B1|ALDH9A1|AGK|ACTB|TPM…	417|558|588|816|921|642|714|969|516|561|918|768|834|486|540|579|366|612|528|546|1080|1056|789|444|747|717|729|705|531|765|552|1020|954|414|804|321|510|600|450|315|1068|876|987|801|582|411|363|564|327|933|504|1014|879|996|453|501|609|1029|981|984|666|762|975|852|678|843|807|1074|1059|906|873|495|372|462|468|882|693|1062|648|354|732|333|1089|384|1053|738|594|858|927|306|438|1086|342|477|633|603|390…
GO Biological Process	GO:0030029	Actin filament-based process	592	28	9.88e-07	6.00524	SLC9A3R1|CAPZA1|GJA1|ELMO2|ARPC5|CFL2|SCN1A|ELMO1|LRRC16A|DPYSL3|TPM4|ARPC5L|ACTB|TPM1|EZR|CSRP1|TPM3|MYO6|PTPN1|PREX1|ALDOA|ERMN|DAAM2|TF|CAPZB|ARRB1|ACTG1|MARCKS	366|612|444|729|765|414|885|582|1014|609|1029|981|975|852|807|873|495|372|693|1062|858|306|1086|633|657|855|957|513
GO Biological Process	GO:0030036	Actin cytoskeleton organization	516	26	1.08e-06	5.96658	SLC9A3R1|CAPZA1|ELMO2|ARPC5|CFL2|ELMO1|LRRC16A|DPYSL3|TPM4|ARPC5L|ACTB|TPM1|EZR|CSRP1|TPM3|MYO6|PTPN1|PREX1|ALDOA|ERMN|DAAM2|TF|CAPZB|ARRB1|ACTG1|MARCKS	366|612|729|765|414|582|1014|609|1029|981|975|852|807|873|495|372|693|1062|858|306|1086|633|657|855|957|513
GO Biological Process	GO:0007015	Actin filament organization	254	18	2.92e-06	5.53462	ELMO2|ARPC5|CFL2|ELMO1|LRRC16A|DPYSL3|TPM4|ARPC5L|TPM1|EZR|TPM3|MYO6|PREX1|ALDOA|ERMN|TF|ARRB1|MARCKS	729|765|414|582|1014|609|1029|981|852|807|495|372|1062|858|306|633|855|513
GO Biological Process	GO:1901575	Organic substance catabolic process	1750	50	5.34e-06	5.27246	HSD17B10|PCK2|AHCY|ACOT8|CRYM|DECR1|ALDOC|SKP1|GDA|SIRT2|PSMB7|ALDH2|HIBADH|ABHD10|GLUD1|HNMT|QDPR|AGL|ADH5|ALDH1A1|HPRT1|TPP1|DDB1|GLUL|PABPC1|ALDH5A1|CRAT|PKM|NPLOC4|DLST|PRDX6|PNP|ACAT2|ECHS1|FABP3|ALDH4A1|SKIV2L|ACOT7|FBXL18|PSME1|BCKDK|ALDOA|ALDH7A1|NAPEPLD|ARRB1|PARK7|EPHX2|ECHDC1|ENO2|NUDT3	417|585|777|921|525|1101|759|642|822|969|351|999|813|699|963|894|396|1083|423|1011|804|510|450|876|639|792|411|1026|504|1017|471|849|960|405|465|720|432|723|897|402|750|858|783|672|855|1023|492|345|549|330
GO Biological Process	GO:0009063	Cellular amino acid catabolic process	124	13	5.64e-06	5.24872	HSD17B10|AHCY|CRYM|HIBADH|GLUD1|HNMT|QDPR|GLUL|ALDH5A1|DLST|ALDH4A1|BCKDK|ALDH7A1	417|777|525|813|963|894|396|876|792|1017|720|750|783
GO Biological Process	GO:0021762	Substantia nigra development	45	9	7.54e-06	5.12263	COX6B1|SIRT2|GLUD1|S100A1|BASP1|ACTB|PADI2|MAG|NDRG2	798|969|963|375|324|975|1089|1053|615
GO Biological Process	GO:0009117	Nucleotide metabolic process	422	22	9.3e-06	5.03152	ACOT8|NAMPT|ALDOC|GDA|HPRT1|PKM|DLST|ACSL4|PNP|HSD17B8|ACOT7|ACOT9|PDHA1|AK3|NADK2|ALDOA|PAICS|HDHD1|PARK7|ENO2|DBI|NUDT3	921|744|759|822|804|1026|1017|501|849|333|723|687|660|846|900|858|684|1050|1023|549|534|330
GO Biological Process	GO:0055086	Nucleobase-containing small molecule metabolic process	508	24	1.13e-05	4.94692	AHCY|ACOT8|NAMPT|ALDOC|GDA|HPRT1|MPI|PKM|DLST|ACSL4|PNP|HSD17B8|ACOT7|ACOT9|PDHA1|AK3|NADK2|ALDOA|PAICS|HDHD1|PARK7|ENO2|DBI|NUDT3	777|921|744|759|822|804|951|1026|1017|501|849|333|723|687|660|846|900|858|684|1050|1023|549|534|330
GO Biological Process	GO:0006796	Phosphate-containing compound metabolic process	2107	55	1.33e-05	4.87615	NDUFB7|ACOT8|PIK3R2|NAMPT|ALDOC|SKP1|PPP3R1|GDA|COX6B1|SLC27A1|LRRC8A|PSMB7|PEBP1|PPP2R5A|CTBP1|NDUFS4|ALDH1A1|HPRT1|CYCS|PKM|NDUFV1|NDUFV2|PGP|DLST|ACSL4|PRDX6|AGK|PNP|MT-ND1|AGT|PTPN1|HSD17B8|ACOT7|ACOT9|PDHA1|AK3|NADK2|PSME1|GRB2|PPP3CA|BCKDK|ALDOA|PAICS|TF|HDHD1|NAPEPLD|GPHN|PARK7|EPHX2|UQCRB|ENO2|PGAM5|DBI|SPTB|NUDT3	558|921|966|744|759|642|714|822|798|429|486|351|654|837|705|954|1011|804|1068|1026|327|933|780|1017|501|471|762|849|678|843|693|333|723|687|660|846|900|402|738|870|750|858|684|633|1050|672|909|1023|492|378|549|1008|534|447|330
GO Biological Process	GO:0072521	Purine-containing compound metabolic process	360	20	1.36e-05	4.86646	AHCY|ACOT8|ALDOC|GDA|HPRT1|PKM|LRRC16A|DLST|ACSL4|PNP|HSD17B8|ACOT7|ACOT9|PDHA1|AK3|ALDOA|PAICS|ENO2|DBI|NUDT3	777|921|759|822|804|1026|1014|1017|501|849|333|723|687|660|846|858|684|549|534|330
GO Biological Process	GO:0044283	Small molecule biosynthetic process	572	25	2.07e-05	4.68403	PCK2|ACOT8|ALDOC|SPR|GDA|SLC1A3|GLUD1|QDPR|HPRT1|GLUL|PKM|PGP|PNP|ACAT2|PTGDS|HSD17B8|ACOT7|ALDOA|GATM|HDHD1|GAMT|PARK7|EPHX2|ENO2|NUDT3	585|921|759|831|822|663|963|396|804|876|1026|780|849|960|702|333|723|858|867|1050|339|1023|492|549|330
GO Biological Process	GO:0022900	Electron transport chain	174	14	2.35e-05	4.62893	NDUFB7|AKR7A2|COX6B1|ALDH2|QDPR|ADH5|NDUFS4|CYCS|NDUFV1|NDUFV2|SLC25A18|MT-ND1|ALDH4A1|UQCRB	558|522|798|999|396|423|954|1068|327|933|636|678|720|378
GO Biological Process	GO:0006810	Transport	4353	88	3.94e-05	4.4045	TIMM13|ACOT8|CRYM|SCG3|CDC37|PIK3R2|ALDOC|PPP3R1|COX6B1|MTX2|HCN2|SLC27A1|EIF2S3|LRRC8A|PSMB7|SLC7A5|SLC4A1|COTL1|SLC9A3R1|CAPZA1|SLC1A3|SRI|ATP6V1B2|SLC1A2|TMEM163|GJA1|CA2|ATP1B3|CCT8|ELMO2|AGL|ARPC5|APEH|LGI3|SCN1A|GLUL|SNCB|DPYSL2|ELMO1|CRAT|PKM|SLC25A18|NPLOC4|LRRC16A|SNCA|ACSL4|GYG1|PRDX6|HNRNPA2B1|AGK|ACTB|PNP|ILF2|AGT|EZR|SYT2|RAP1A|AHCYL1|MYO6|SGIP1|SNCG|FABP3|ATP6V1G1|PADI2|KCNA1|PSME1|…	588|921|525|624|1005|966|759|714|798|516|318|429|561|486|351|459|540|579|366|612|663|741|546|1080|408|444|945|426|717|729|1083|765|1020|474|885|876|987|801|582|411|1026|636|504|1014|453|501|591|471|984|762|975|849|309|843|807|1059|498|627|372|468|648|465|732|1089|384|402|738|348|594|870|858|438|633|381|576|390|651|657|855|399|1107|1023|420|492|675|447|957|555
GO Biological Process	GO:0045333	Cellular respiration	158	13	5.22e-05	4.28233	NDUFB7|ACO2|IDH3G|COX6B1|NDUFS4|CYCS|NDUFV1|NDUFV2|SLC25A18|DLST|MT-ND1|PDHA1|UQCRB	558|978|1047|798|954|1068|327|933|636|1017|678|660|378
GO Biological Process	GO:0097435	Supramolecular fiber organization	480	22	5.62e-05	4.25026	ELMO2|ARPC5|CFL2|ELMO1|LRRC16A|SNCA|DPYSL3|TPM4|ARPC5L|TPM1|EZR|CSRP1|TPM3|MYO6|PREX1|ALDOA|ERMN|CST3|TF|ARRB1|ACTG1|MARCKS	729|765|414|582|1014|453|609|1029|981|852|807|873|495|372|1062|858|306|438|633|855|957|513
GO Biological Process	GO:0009056	Catabolic process	2042	52	5.88e-05	4.23062	HSD17B10|PCK2|AHCY|ACOT8|CRYM|DECR1|ALDOC|SKP1|GDA|SIRT2|PSMB7|ALDH2|HIBADH|ABHD10|GLUD1|HNMT|QDPR|AGL|ADH5|ALDH1A1|HPRT1|TPP1|DDB1|GLUL|PABPC1|ALDH5A1|CRAT|PKM|NPLOC4|DLST|PRDX6|PNP|ACAT2|ECHS1|FABP3|ALDH4A1|SKIV2L|ACOT7|FBXL18|PSME1|BCKDK|ALDOA|ALDH7A1|CRYZ|NAPEPLD|ARRB1|PARK7|EPHX2|ECHDC1|ENO2|PGAM5|NUDT3	417|585|777|921|525|1101|759|642|822|969|351|999|813|699|963|894|396|1083|423|1011|804|510|450|876|639|792|411|1026|504|1017|471|849|960|405|465|720|432|723|897|402|750|858|783|828|672|855|1023|492|345|549|1008|330
GO Biological Process	GO:0051234	Establishment of localization	4479	89	6.03e-05	4.21968	TIMM13|ACOT8|CRYM|SCG3|CDC37|PIK3R2|ALDOC|PPP3R1|COX6B1|MTX2|HCN2|SLC27A1|EIF2S3|LRRC8A|PSMB7|SLC7A5|SLC4A1|COTL1|SLC9A3R1|CAPZA1|SLC1A3|SRI|ATP6V1B2|SLC1A2|TMEM163|GJA1|CA2|ATP1B3|CCT8|ELMO2|AGL|ARPC5|APEH|LGI3|SCN1A|GLUL|SNCB|DPYSL2|ELMO1|CRAT|PKM|SLC25A18|NPLOC4|LRRC16A|SNCA|ACSL4|GYG1|PRDX6|HNRNPA2B1|AGK|ACTB|PNP|ILF2|AGT|EZR|SYT2|RAP1A|AHCYL1|MYO6|SGIP1|SNCG|FABP3|ATP6V1G1|PADI2|KCNA1|PSME1|…	588|921|525|624|1005|966|759|714|798|516|318|429|561|486|351|459|540|579|366|612|663|741|546|1080|408|444|945|426|717|729|1083|765|1020|474|885|876|987|801|582|411|1026|636|504|1014|453|501|591|471|984|762|975|849|309|843|807|1059|498|627|372|468|648|465|732|1089|384|402|738|348|594|870|858|438|342|633|381|576|390|651|657|855|399|1107|1023|420|492|675|447|957|555
GO Biological Process	GO:0009058	Biosynthetic process	2788	64	6.03e-05	4.21968	PCK2|ACOT8|PIK3R2|NAMPT|ALDOC|SPR|GDA|SLC27A1|EIF2S3|PPP1R1B|PTCD3|MRPS36|SLC1A3|GLUD1|MRPL49|DENR|QDPR|AGL|APEH|HPRT1|TERF2IP|GLUL|PABPC1|MPI|PRMT5|PKM|PGP|NPLOC4|MRPL12|SNCA|ACSL4|GYG1|ALDH9A1|AGK|GMPPA|PNP|ILF2|ACAT2|NUCKS1|RBMX|PTGDS|RBBP4|HSD17B8|ACOT7|PDHA1|AK3|NADK2|FECH|ALDOA|GATM|DEK|PAICS|ALDH7A1|HDHD1|GAMT|ARRB1|GPHN|PARK7|PPIA|MRPS27|EPHX2|ENO2|NUDT3|HIST1H4A	585|921|966|744|759|831|822|429|561|915|918|834|663|963|1056|789|396|1083|1020|804|600|876|639|951|363|1026|780|504|879|453|501|591|666|762|990|849|309|960|1074|462|702|354|333|723|660|846|900|825|858|867|927|684|783|1050|339|855|909|1023|420|726|492|549|330|708
GO Biological Process	GO:0015980	Energy derivation by oxidation of organic compounds	223	15	6.03e-05	4.21968	NDUFB7|ACO2|IDH3G|COX6B1|AGL|NDUFS4|CYCS|NDUFV1|NDUFV2|SLC25A18|DLST|GYG1|MT-ND1|PDHA1|UQCRB	558|978|1047|798|1083|954|1068|327|933|636|1017|591|678|660|378
GO Biological Process	GO:0006163	Purine nucleotide metabolic process	329	18	6.06e-05	4.21753	ACOT8|ALDOC|GDA|HPRT1|PKM|DLST|ACSL4|PNP|HSD17B8|ACOT7|ACOT9|PDHA1|AK3|ALDOA|PAICS|ENO2|DBI|NUDT3	921|759|822|804|1026|1017|501|849|333|723|687|660|846|858|684|549|534|330
GO Biological Process	GO:0071704	Organic substance metabolic process	7755	132	6.14e-05	4.21183	HSD17B10|ACO2|PCK2|AHCY|ACOT8|IDH3G|CRYM|SCG3|DECR1|PIK3R2|NAMPT|ALDOC|SKP1|PPP3R1|SPR|AKR7A2|GDA|SIRT2|SLC27A1|EIF2S3|PPP1R1B|PTCD3|MRPS36|LRRC8A|PSMB7|PEBP1|PPP2R5A|ALDH2|SLC1A3|TNC|HIBADH|L2HGDH|ABHD10|NONO|GLUD1|MRPL49|HNMT|DENR|QDPR|CTBP1|AGL|HDAC11|ADH5|APEH|ALDH1A1|HPRT1|TPP1|TERF2IP|DDB1|CYCS|GLUL|SNCB|DPYSL2|PABPC1|GRHPR|ALDH5A1|CRAT|MPI|PRMT5|PKM|PGP|NPLOC4|LRRC16A|MRPL12|DLST|SNCA|ACSL…	417|978|585|777|921|1047|525|624|1101|966|744|759|642|714|831|522|822|969|429|561|915|918|834|486|351|654|837|999|663|528|813|573|699|1077|963|1056|894|789|396|705|1083|552|423|1020|1011|804|510|600|450|1068|876|987|801|639|993|792|411|951|363|1026|780|504|1014|879|1017|453|501|591|471|984|666|762|975|849|309|843|960|807|1074|1071|405|627|462|693|702|354|465|333|720|432|1089|723|687|660|942|846|9…
GO Biological Process	GO:1901576	Organic substance biosynthetic process	2734	63	6.14e-05	4.21183	PCK2|ACOT8|PIK3R2|NAMPT|ALDOC|SPR|GDA|SLC27A1|EIF2S3|PPP1R1B|PTCD3|MRPS36|SLC1A3|GLUD1|MRPL49|DENR|QDPR|AGL|APEH|HPRT1|TERF2IP|GLUL|PABPC1|MPI|PRMT5|PKM|PGP|NPLOC4|MRPL12|SNCA|ACSL4|GYG1|ALDH9A1|AGK|PNP|ILF2|ACAT2|NUCKS1|RBMX|PTGDS|RBBP4|HSD17B8|ACOT7|PDHA1|AK3|NADK2|FECH|ALDOA|GATM|DEK|PAICS|ALDH7A1|HDHD1|GAMT|ARRB1|GPHN|PARK7|PPIA|MRPS27|EPHX2|ENO2|NUDT3|HIST1H4A	585|921|966|744|759|831|822|429|561|915|918|834|663|963|1056|789|396|1083|1020|804|600|876|639|951|363|1026|780|504|879|453|501|591|666|762|849|309|960|1074|462|702|354|333|723|660|846|900|825|858|867|927|684|783|1050|339|855|909|1023|420|726|492|549|330|708
GO Biological Process	GO:1901564	Organonitrogen compound metabolic process	5244	99	8e-05	4.09691	HSD17B10|AHCY|ACOT8|CRYM|SCG3|NAMPT|ALDOC|SKP1|PPP3R1|SPR|GDA|SIRT2|SLC27A1|EIF2S3|PTCD3|MRPS36|LRRC8A|PSMB7|PEBP1|PPP2R5A|SLC1A3|TNC|HIBADH|L2HGDH|GLUD1|MRPL49|HNMT|DENR|QDPR|CTBP1|HDAC11|ADH5|APEH|HPRT1|TPP1|DDB1|CYCS|GLUL|SNCB|PABPC1|ALDH5A1|CRAT|MPI|PRMT5|PKM|PGP|NPLOC4|LRRC16A|MRPL12|DLST|SNCA|ACSL4|ALDH9A1|AGK|ACTB|PNP|AGT|PCMT1|RBMX|PTPN1|HSD17B8|ALDH4A1|PADI2|ACOT7|ACOT9|PDHA1|AK3|NADK2|F…	417|777|921|525|624|744|759|642|714|831|822|969|429|561|918|834|486|351|654|837|663|528|813|573|963|1056|894|789|396|705|552|423|1020|804|510|450|1068|876|987|639|792|411|951|363|1026|780|504|1014|879|1017|453|501|666|762|975|849|843|1071|462|693|333|720|1089|723|687|660|846|900|897|402|825|738|870|750|858|867|696|438|972|684|477|633|381|783|603|1050|339|672|855|909|1023|420|726|549|1008|534|447|…
GO Biological Process	GO:0019637	Organophosphate metabolic process	870	30	9.05e-05	4.04335	ACOT8|PIK3R2|NAMPT|ALDOC|GDA|SLC27A1|ALDH1A1|HPRT1|PKM|PGP|DLST|ACSL4|PRDX6|AGK|PNP|HSD17B8|ACOT7|ACOT9|PDHA1|AK3|NADK2|ALDOA|PAICS|HDHD1|NAPEPLD|GPHN|PARK7|ENO2|DBI|NUDT3	921|966|744|759|822|429|1011|804|1026|780|1017|501|471|762|849|333|723|687|660|846|900|858|684|1050|672|909|1023|549|534|330
GO Biological Process	GO:0140352	Export from cell	1028	33	0.0001	4	SCG3|ALDOC|SLC27A1|PSMB7|COTL1|SLC1A3|SLC1A2|GJA1|ATP1B3|CCT8|AGL|ARPC5|APEH|LGI3|PKM|SNCA|GYG1|PRDX6|PNP|ILF2|AGT|SYT2|RAP1A|SNCG|PADI2|ALDOA|CST3|TF|SLC4A4|GCA|PARK7|PPIA|METTL7A	624|759|429|351|579|663|1080|444|426|717|1083|765|1020|474|1026|453|591|471|849|309|843|1059|498|648|1089|858|438|633|576|390|1023|420|675
GO Biological Process	GO:0044249	Cellular biosynthetic process	2611	60	0.00013	3.88606	PCK2|ACOT8|PIK3R2|NAMPT|SPR|GDA|SLC27A1|EIF2S3|PPP1R1B|PTCD3|MRPS36|SLC1A3|GLUD1|MRPL49|DENR|QDPR|AGL|APEH|HPRT1|TERF2IP|GLUL|PABPC1|MPI|PRMT5|PKM|PGP|NPLOC4|MRPL12|SNCA|ACSL4|GYG1|ALDH9A1|AGK|PNP|ILF2|NUCKS1|RBMX|PTGDS|RBBP4|HSD17B8|ACOT7|PDHA1|AK3|NADK2|FECH|ALDOA|GATM|DEK|PAICS|ALDH7A1|HDHD1|GAMT|ARRB1|GPHN|PARK7|PPIA|MRPS27|EPHX2|NUDT3|HIST1H4A	585|921|966|744|831|822|429|561|915|918|834|663|963|1056|789|396|1083|1020|804|600|876|639|951|363|1026|780|504|879|453|501|591|666|762|849|309|1074|462|702|354|333|723|660|846|900|825|858|867|927|684|783|1050|339|855|909|1023|420|726|492|330|708
GO Biological Process	GO:0044248	Cellular catabolic process	1758	46	0.00013	3.88606	HSD17B10|PCK2|AHCY|ACOT8|CRYM|DECR1|SKP1|GDA|SIRT2|PSMB7|HIBADH|ABHD10|GLUD1|HNMT|QDPR|AGL|ADH5|HPRT1|TPP1|DDB1|GLUL|PABPC1|ALDH5A1|CRAT|NPLOC4|DLST|PRDX6|PNP|ACAT2|ECHS1|FABP3|ALDH4A1|SKIV2L|ACOT7|FBXL18|PSME1|BCKDK|ALDH7A1|CRYZ|NAPEPLD|ARRB1|PARK7|EPHX2|ECHDC1|PGAM5|NUDT3	417|585|777|921|525|1101|642|822|969|351|813|699|963|894|396|1083|423|804|510|450|876|639|792|411|504|1017|471|849|960|405|465|720|432|723|897|402|750|783|828|672|855|1023|492|345|1008|330
GO Biological Process	GO:0043933	Protein-containing complex subunit organization	1539	42	0.00015	3.82391	HSD17B10|NDUFB7|ST13|SKP1|EIF2S3|PTCD3|MRPS36|LRRC8A|SLC9A3R1|CAPZA1|SLC1A2|MRPL49|DENR|VBP1|CCT8|APEH|NDUFS4|CFL2|HPRT1|DDB1|TMEM126A|PRMT5|NDUFV1|NDUFV2|MRPL12|SNCA|ALDH9A1|MT-ND1|AGT|RBMX|SGIP1|PREX1|RBBP4|HSD17B8|KCNA1|ALDOA|HIST2H3A|CRYZ|MRPS27|UQCRB|LUC7L2|HIST1H4A	417|558|816|642|561|918|834|486|366|612|1080|1056|789|747|717|1020|954|414|804|450|315|363|327|933|879|453|666|678|843|462|468|1062|354|333|384|858|477|828|726|378|795|708
GO Biological Process	GO:0006081	Cellular aldehyde metabolic process	55	8	0.0002	3.69897	AKR7A2|ADH5|ALDH1A1|GRHPR|ALDH9A1|ALDH4A1|ALDH7A1|PARK7	522|423|1011|993|666|720|783|1023
GO Biological Process	GO:0051179	Localization	5591	102	0.00022	3.65758	TIMM13|ACOT8|CRYM|SCG3|CDC37|PIK3R2|ALDOC|SKP1|PPP3R1|COX6B1|MTX2|HCN2|SLC27A1|EIF2S3|LRRC8A|PSMB7|SLC7A5|SLC4A1|COTL1|SLC9A3R1|CAPZA1|SLC1A3|SRI|ATP6V1B2|SLC1A2|TMEM163|GJA1|CA2|ATP1B3|CCT8|ELMO2|AGL|ARPC5|APEH|CFL2|JAM3|TPP1|TERF2IP|LGI3|SCN1A|GLUL|SNCB|DPYSL2|ELMO1|CRAT|PKM|SLC25A18|NPLOC4|LRRC16A|SNCA|ACSL4|GYG1|PRDX6|ARPC5L|HNRNPA2B1|AGK|ACTB|PNP|ILF2|AGT|EZR|SYT2|NAV1|RAP1A|AHCYL1|MYO6|SGIP…	588|921|525|624|1005|966|759|642|714|798|516|318|429|561|486|351|459|540|579|366|612|663|741|546|1080|408|444|945|426|717|729|1083|765|1020|414|321|510|600|474|885|876|987|801|582|411|1026|636|504|1014|453|501|591|471|981|984|762|975|849|309|843|807|1059|906|498|627|372|468|882|1062|648|465|732|888|1089|384|402|1053|738|348|594|870|858|438|342|633|381|576|390|651|657|567|855|399|1107|909|1023|420…
GO Biological Process	GO:0006996	Organelle organization	3450	72	0.00022	3.65758	HSD17B10|NDUFB7|TIMM13|ACOT8|SKP1|PPP3R1|SIRT2|MTX2|SLC9A3R1|CAPZA1|ATP6V1B2|DENR|GJA1|ELMO2|CTBP1|ARPC5|HDAC11|NDUFS4|CFL2|TPP1|TERF2IP|DDB1|TMEM126A|CYCS|DPYSL2|ELMO1|CRAT|PRMT5|CHORDC1|NDUFV1|NDUFV2|NPLOC4|LRRC16A|SYNM|SNCA|DPYSL3|TPM4|ARPC5L|HNRNPA2B1|AGK|ACTB|TPM1|MT-ND1|EZR|NUCKS1|NAV1|CSRP1|TPM3|MYO6|PTPN1|PREX1|RBBP4|ATP6V1G1|PADI2|HSPA2|ALDOA|DEK|ERMN|DAAM2|HIST2H3A|TF|CAPZB|ARRB1|PARK7|…	417|558|588|921|642|714|969|516|366|612|546|789|444|729|705|765|552|954|414|510|600|450|315|1068|801|582|411|363|564|327|933|504|1014|996|453|609|1029|981|984|762|975|852|678|807|1074|906|873|495|372|693|1062|354|732|1089|594|858|927|306|1086|477|633|657|855|1023|420|786|492|378|447|957|513|708
GO Biological Process	GO:0044271	Cellular nitrogen compound biosynthetic process	1522	41	0.00026	3.58503	NAMPT|SPR|GDA|EIF2S3|PPP1R1B|PTCD3|MRPS36|MRPL49|DENR|QDPR|APEH|HPRT1|TERF2IP|PABPC1|MPI|PRMT5|PKM|NPLOC4|MRPL12|ACSL4|ALDH9A1|AGK|PNP|ILF2|RBMX|HSD17B8|ACOT7|PDHA1|AK3|NADK2|FECH|ALDOA|DEK|PAICS|ALDH7A1|HDHD1|ARRB1|PPIA|MRPS27|NUDT3|HIST1H4A	744|831|822|561|915|918|834|1056|789|396|1020|804|600|639|951|363|1026|504|879|501|666|762|849|309|462|333|723|660|846|900|825|858|927|684|783|1050|855|420|726|330|708
GO Biological Process	GO:1901606	Alpha-amino acid catabolic process	104	10	0.00026	3.58503	AHCY|CRYM|HIBADH|GLUD1|HNMT|QDPR|GLUL|DLST|ALDH4A1|ALDH7A1	777|525|813|963|894|396|876|1017|720|783
GO Biological Process	GO:0010243	Response to organonitrogen compound	987	31	0.00032	3.49485	PCK2|PIK3R2|NAMPT|SIRT2|HCN2|SLC27A1|PPP1R1B|SLC9A3R1|ATP6V1B2|SLC1A2|HNMT|QDPR|GJA1|CA2|NDUFS4|HPRT1|PKM|NPLOC4|SNCA|ACTB|AGT|EZR|RAP1A|AHCYL1|PTPN1|RBBP4|FABP3|ATP6V1G1|GRB2|PPP3CA|GABRG2	585|966|744|969|318|429|915|366|546|1080|894|396|444|945|954|804|1026|504|453|975|843|807|498|627|693|354|465|732|738|870|399
GO Biological Process	GO:0042221	Response to chemical	4333	84	0.00033	3.48149	PCK2|AHCY|PIK3R2|NAMPT|SKP1|HSPE1|AKR7A2|SIRT2|HCN2|SLC27A1|PPP1R1B|SERPINF1|LRRC8A|PSMB7|SLC9A3R1|CAPZA1|SLC1A3|TNC|ATP6V1B2|SLC1A2|HNMT|QDPR|GJA1|CA2|ELMO2|S100B|AGL|ADH5|NDUFS4|HPRT1|TPP1|CYCS|GLUL|SNCB|DPYSL2|PKM|NPLOC4|SNCA|ACSL4|PRDX6|DPYSL3|HNRNPA2B1|ACTB|TPM1|STIP1|PNP|MT-ND1|AGT|EZR|SYT2|RAP1A|AHCYL1|MYO6|RBMX|LGI1|PTPN1|PREX1|RBBP4|FABP3|ATP6V1G1|CUTA|PADI2|SERPINB9|KCNA1|PSME1|FECH|GRB…	585|777|966|744|642|570|522|969|318|429|915|771|486|351|366|612|663|528|546|1080|894|396|444|945|729|531|1083|423|954|804|510|1068|876|987|801|1026|504|453|501|471|609|984|975|852|537|849|678|843|807|1059|498|627|372|462|882|693|1062|354|465|732|888|1089|1104|384|402|825|738|594|870|438|912|342|477|633|828|819|855|399|909|1023|420|492|447|957
GO Biological Process	GO:0009150	Purine ribonucleotide metabolic process	303	16	0.00033	3.48149	ACOT8|ALDOC|HPRT1|PKM|DLST|ACSL4|HSD17B8|ACOT7|ACOT9|PDHA1|AK3|ALDOA|PAICS|ENO2|DBI|NUDT3	921|759|804|1026|1017|501|333|723|687|660|846|858|684|549|534|330
GO Biological Process	GO:0046034	ATP metabolic process	204	13	0.00045	3.34679	NDUFB7|ALDOC|COX6B1|ATP6V1B2|NDUFS4|CYCS|PKM|NDUFV1|NDUFV2|MT-ND1|ALDOA|UQCRB|ENO2	558|759|798|546|954|1068|1026|327|933|678|858|378|549
GO Biological Process	GO:1901566	Organonitrogen compound biosynthetic process	1346	37	0.00055	3.25964	NAMPT|SPR|SLC27A1|EIF2S3|PTCD3|MRPS36|SLC1A3|GLUD1|MRPL49|DENR|QDPR|APEH|HPRT1|GLUL|PABPC1|MPI|PKM|MRPL12|SNCA|ACSL4|ALDH9A1|AGK|PNP|HSD17B8|ACOT7|PDHA1|AK3|NADK2|FECH|ALDOA|GATM|PAICS|ALDH7A1|HDHD1|GAMT|GPHN|MRPS27	744|831|429|561|918|834|663|963|1056|789|396|1020|804|876|639|951|1026|879|453|501|666|762|849|333|723|660|846|900|825|858|867|684|783|1050|339|909|726
GO Biological Process	GO:0038093	Fc receptor signaling pathway	177	12	0.00058	3.23657	PIK3R2|SKP1|PPP3R1|PSMB7|ELMO2|ARPC5|ELMO1|ACTB|PSME1|GRB2|PPP3CA|ACTG1	966|642|714|351|729|765|582|975|402|738|870|957
GO Biological Process	GO:0051050	Positive regulation of transport	923	29	0.00062	3.20761	PIK3R2|PPP3R1|SLC9A3R1|SRI|GLUD1|SLC1A2|GJA1|CA2|ATP1B3|S100A1|GLUL|SNCA|ACSL4|ACTB|AGT|EZR|RAP1A|AHCYL1|SGIP1|FABP3|KCNA1|HSPA2|PPP3CA|RDX|TF|ARRB1|PARK7|PPIA|DBI	966|714|366|741|963|1080|444|945|426|375|876|453|501|975|843|807|498|627|468|465|384|594|870|342|633|855|1023|420|534
GO Biological Process	GO:0032940	Secretion by cell	979	30	0.00066	3.18046	SCG3|ALDOC|PSMB7|COTL1|SLC1A3|SLC1A2|GJA1|CCT8|AGL|ARPC5|APEH|LGI3|PKM|SNCA|GYG1|PRDX6|PNP|ILF2|AGT|SYT2|RAP1A|SNCG|PADI2|ALDOA|CST3|TF|GCA|PARK7|PPIA|METTL7A	624|759|351|579|663|1080|444|717|1083|765|1020|474|1026|453|591|471|849|309|843|1059|498|648|1089|858|438|633|390|1023|420|675
GO Biological Process	GO:0002274	Myeloid leukocyte activation	585	22	0.00069	3.16115	NAMPT|ALDOC|PSMB7|COTL1|CCT8|AGL|ARPC5|APEH|PKM|SNCA|GYG1|PRDX6|PNP|ILF2|RAP1A|PREX1|PADI2|ALDOA|CST3|GCA|PPIA|METTL7A	744|759|351|579|717|1083|765|1020|1026|453|591|471|849|309|498|1062|1089|858|438|390|420|675
GO Biological Process	GO:0043648	Dicarboxylic acid metabolic process	93	9	0.00069	3.16115	ACOT8|MRPS36|L2HGDH|GLUD1|GLUL|GRHPR|ALDH5A1|DLST|ALDH4A1	921|834|573|963|876|993|792|1017|720
GO Biological Process	GO:0042119	Neutrophil activation	497	20	0.00073	3.13668	ALDOC|PSMB7|COTL1|CCT8|AGL|ARPC5|APEH|PKM|GYG1|PRDX6|PNP|ILF2|RAP1A|PREX1|PADI2|ALDOA|CST3|GCA|PPIA|METTL7A	759|351|579|717|1083|765|1020|1026|591|471|849|309|498|1062|1089|858|438|390|420|675
GO Biological Process	GO:0046903	Secretion	1097	32	0.00076	3.11919	SCG3|ALDOC|PSMB7|COTL1|SLC9A3R1|SLC1A3|SLC1A2|GJA1|CA2|CCT8|AGL|ARPC5|APEH|LGI3|PKM|SNCA|GYG1|PRDX6|PNP|ILF2|AGT|SYT2|RAP1A|SNCG|PADI2|ALDOA|CST3|TF|GCA|PARK7|PPIA|METTL7A	624|759|351|579|366|663|1080|444|945|717|1083|765|1020|474|1026|453|591|471|849|309|843|1059|498|648|1089|858|438|633|390|1023|420|675
GO Biological Process	GO:1901362	Organic cyclic compound biosynthetic process	1211	34	0.00081	3.09151	ACOT8|NAMPT|SPR|GDA|PPP1R1B|QDPR|HPRT1|TERF2IP|MPI|PRMT5|PKM|NPLOC4|MRPL12|SNCA|ACSL4|PNP|ILF2|ACAT2|RBMX|HSD17B8|ACOT7|PDHA1|AK3|NADK2|FECH|ALDOA|DEK|PAICS|HDHD1|ARRB1|GPHN|PPIA|NUDT3|HIST1H4A	921|744|831|822|915|396|804|600|951|363|1026|504|879|453|501|849|309|960|462|333|723|660|846|900|825|858|927|684|1050|855|909|420|330|708
GO Biological Process	GO:0018130	Heterocycle biosynthetic process	1061	31	0.001	3	NAMPT|SPR|GDA|PPP1R1B|QDPR|HPRT1|TERF2IP|MPI|PRMT5|PKM|NPLOC4|MRPL12|ACSL4|PNP|ILF2|RBMX|HSD17B8|ACOT7|PDHA1|AK3|NADK2|FECH|ALDOA|DEK|PAICS|HDHD1|ARRB1|GPHN|PPIA|NUDT3|HIST1H4A	744|831|822|915|396|804|600|951|363|1026|504|879|501|849|309|462|333|723|660|846|900|825|858|927|684|1050|855|909|420|330|708
GO Biological Process	GO:1901615	Organic hydroxy compound metabolic process	467	19	0.001	3	ACO2|PCK2|ACOT8|IDH3G|CRYM|SPR|AKR7A2|ALDH2|QDPR|ADH5|ALDH1A1|HPRT1|SNCB|PGP|SNCA|ACAT2|NAPEPLD|PARK7|NUDT3	978|585|921|1047|525|831|522|999|396|423|1011|804|987|780|453|960|672|1023|330
GO Biological Process	GO:0007010	Cytoskeleton organization	1126	32	0.0011	2.95861	SLC9A3R1|CAPZA1|GJA1|ELMO2|ARPC5|CFL2|DPYSL2|ELMO1|CHORDC1|LRRC16A|SYNM|DPYSL3|TPM4|ARPC5L|ACTB|TPM1|EZR|NAV1|CSRP1|TPM3|MYO6|PTPN1|PREX1|ALDOA|ERMN|DAAM2|TF|CAPZB|ARRB1|SPTB|ACTG1|MARCKS	366|612|444|729|765|414|801|582|564|1014|996|609|1029|981|975|852|807|906|873|495|372|693|1062|858|306|1086|633|657|855|447|957|513
GO Biological Process	GO:0019438	Aromatic compound biosynthetic process	1070	31	0.0011	2.95861	NAMPT|SPR|GDA|PPP1R1B|QDPR|HPRT1|TERF2IP|MPI|PRMT5|PKM|NPLOC4|MRPL12|SNCA|ACSL4|PNP|ILF2|RBMX|HSD17B8|ACOT7|PDHA1|AK3|NADK2|FECH|ALDOA|DEK|PAICS|HDHD1|ARRB1|PPIA|NUDT3|HIST1H4A	744|831|822|915|396|804|600|951|363|1026|504|879|453|501|849|309|462|333|723|660|846|900|825|858|927|684|1050|855|420|330|708
GO Biological Process	GO:0002444	Myeloid leukocyte mediated immunity	516	20	0.0011	2.95861	ALDOC|PSMB7|COTL1|CCT8|AGL|ARPC5|APEH|PKM|GYG1|PRDX6|PNP|ILF2|RAP1A|PADI2|SERPINB9|ALDOA|CST3|GCA|PPIA|METTL7A	759|351|579|717|1083|765|1020|1026|591|471|849|309|498|1089|1104|858|438|390|420|675
GO Biological Process	GO:0044238	Primary metabolic process	7332	121	0.0013	2.88606	HSD17B10|ACO2|PCK2|AHCY|ACOT8|IDH3G|CRYM|SCG3|DECR1|PIK3R2|NAMPT|ALDOC|SKP1|PPP3R1|AKR7A2|GDA|SIRT2|SLC27A1|EIF2S3|PPP1R1B|PTCD3|MRPS36|LRRC8A|PSMB7|PEBP1|PPP2R5A|ALDH2|SLC1A3|TNC|HIBADH|L2HGDH|ABHD10|NONO|GLUD1|MRPL49|HNMT|DENR|QDPR|CTBP1|AGL|HDAC11|ADH5|APEH|ALDH1A1|HPRT1|TPP1|TERF2IP|DDB1|CYCS|GLUL|DPYSL2|PABPC1|ALDH5A1|CRAT|MPI|PRMT5|PKM|PGP|NPLOC4|MRPL12|DLST|SNCA|ACSL4|GYG1|PRDX6|HNRNPA2B1|…	417|978|585|777|921|1047|525|624|1101|966|744|759|642|714|522|822|969|429|561|915|918|834|486|351|654|837|999|663|528|813|573|699|1077|963|1056|894|789|396|705|1083|552|423|1020|1011|804|510|600|450|1068|876|801|639|792|411|951|363|1026|780|504|879|1017|453|501|591|471|984|762|975|849|309|843|960|1074|1071|405|627|462|693|702|465|333|720|432|1089|723|687|660|846|900|897|402|738|870|750|858|927|69…
GO Biological Process	GO:0006631	Fatty acid metabolic process	311	15	0.0014	2.85387	PCK2|ACOT8|DECR1|SLC27A1|ADH5|CRAT|ACSL4|ACAT2|ECHS1|PTGDS|FABP3|HSD17B8|ACOT7|EPHX2|ECHDC1	585|921|1101|429|423|411|501|960|405|702|465|333|723|492|345
GO Biological Process	GO:0043312	Neutrophil degranulation	484	19	0.0015	2.82391	ALDOC|PSMB7|COTL1|CCT8|AGL|ARPC5|APEH|PKM|GYG1|PRDX6|PNP|ILF2|RAP1A|PADI2|ALDOA|CST3|GCA|PPIA|METTL7A	759|351|579|717|1083|765|1020|1026|591|471|849|309|498|1089|858|438|390|420|675
GO Biological Process	GO:0009060	Aerobic respiration	79	8	0.0015	2.82391	ACO2|IDH3G|COX6B1|CYCS|DLST|MT-ND1|PDHA1|UQCRB	978|1047|798|1068|1017|678|660|378
GO Biological Process	GO:0022904	Respiratory electron transport chain	107	9	0.0016	2.79588	NDUFB7|COX6B1|NDUFS4|CYCS|NDUFV1|NDUFV2|SLC25A18|MT-ND1|UQCRB	558|798|954|1068|327|933|636|678|378
GO Biological Process	GO:0006520	Cellular amino acid metabolic process	278	14	0.0017	2.76955	HSD17B10|AHCY|CRYM|SLC1A3|HIBADH|GLUD1|HNMT|QDPR|GLUL|ALDH5A1|DLST|ALDH4A1|BCKDK|ALDH7A1	417|777|525|663|813|963|894|396|876|792|1017|720|750|783
GO Biological Process	GO:0016192	Vesicle-mediated transport	1805	43	0.0019	2.72125	SCG3|PIK3R2|ALDOC|PSMB7|COTL1|CAPZA1|CCT8|ELMO2|AGL|ARPC5|APEH|LGI3|SNCB|DPYSL2|ELMO1|PKM|LRRC16A|SNCA|GYG1|PRDX6|ACTB|PNP|ILF2|EZR|SYT2|RAP1A|MYO6|SGIP1|PADI2|GRB2|HSPA2|ALDOA|CST3|TF|PREPL|GCA|CAPZB|ARRB1|FNBP1|PPIA|METTL7A|SPTB|ACTG1	624|966|759|351|579|612|717|729|1083|765|1020|474|987|801|582|1026|1014|453|591|471|975|849|309|807|1059|498|372|468|1089|738|594|858|438|633|381|390|657|855|1107|420|675|447|957
GO Biological Process	GO:1901700	Response to oxygen-containing compound	1567	39	0.0019	2.72125	PCK2|PIK3R2|NAMPT|SIRT2|HCN2|SLC27A1|PPP1R1B|SERPINF1|SLC9A3R1|TNC|ATP6V1B2|SLC1A2|HNMT|QDPR|GJA1|CA2|ADH5|NDUFS4|GLUL|PKM|SNCA|ACTB|TPM1|MT-ND1|AGT|EZR|RAP1A|AHCYL1|PTPN1|RBBP4|FABP3|ATP6V1G1|FECH|GRB2|PPP3CA|CST3|TXNRD2|OXR1|PARK7	585|966|744|969|318|429|915|771|366|528|546|1080|894|396|444|945|423|954|876|1026|453|975|852|678|843|807|498|627|693|354|465|732|825|738|870|438|912|819|1023
GO Biological Process	GO:0034764	Positive regulation of transmembrane transport	208	12	0.0019	2.72125	SLC9A3R1|SRI|SLC1A2|CA2|ATP1B3|S100A1|SNCA|AGT|RAP1A|KCNA1|HSPA2|PARK7	366|741|1080|945|426|375|453|843|498|384|594|1023
GO Biological Process	GO:0045055	Regulated exocytosis	697	23	0.0023	2.63827	SCG3|ALDOC|PSMB7|COTL1|CCT8|AGL|ARPC5|APEH|PKM|SNCA|GYG1|PRDX6|PNP|ILF2|SYT2|RAP1A|PADI2|ALDOA|CST3|TF|GCA|PPIA|METTL7A	624|759|351|579|717|1083|765|1020|1026|453|591|471|849|309|1059|498|1089|858|438|633|390|420|675
GO Biological Process	GO:0065003	Protein-containing complex assembly	1293	34	0.0024	2.61979	HSD17B10|NDUFB7|ST13|SKP1|EIF2S3|LRRC8A|SLC9A3R1|CAPZA1|SLC1A2|DENR|VBP1|CCT8|NDUFS4|HPRT1|DDB1|TMEM126A|PRMT5|NDUFV1|NDUFV2|SNCA|ALDH9A1|MT-ND1|RBMX|SGIP1|PREX1|RBBP4|HSD17B8|KCNA1|ALDOA|HIST2H3A|CRYZ|UQCRB|LUC7L2|HIST1H4A	417|558|816|642|561|486|366|612|1080|789|747|717|954|804|450|315|363|327|933|453|666|678|462|468|1062|354|333|384|858|477|828|378|795|708
GO Biological Process	GO:0042775	Mitochondrial atp synthesis coupled electron transport	87	8	0.0024	2.61979	NDUFB7|COX6B1|NDUFS4|CYCS|NDUFV1|NDUFV2|MT-ND1|UQCRB	558|798|954|1068|327|933|678|378
GO Biological Process	GO:0051128	Regulation of cellular component organization	2402	52	0.0025	2.60206	CDC37|PPP3R1|SIRT2|SERPINF1|COTL1|CAPZA1|GJA1|CCT8|CTBP1|ARPC5|SERPINI1|CFL2|JAM3|TERF2IP|DDB1|DPYSL2|PRMT5|CHORDC1|LRRC16A|SNCA|ACSL4|DPYSL3|ARPC5L|HNRNPA2B1|TPM1|AGT|EZR|SYT2|RAP1A|SMAP1|SGIP1|LGI1|PTPN1|PREX1|PADI2|MAG|GRB2|CCT4|HSPA2|PPP3CA|ERMN|CST3|LCMT1|RDX|TF|CAPZB|ARRB1|PARK7|TMEM33|ENO2|SPTB|ACTG1	1005|714|969|771|579|612|444|717|705|765|645|414|321|600|450|801|363|564|1014|453|501|609|981|984|852|843|807|1059|498|840|468|882|693|1062|1089|1053|738|348|594|870|306|438|972|342|633|657|855|1023|786|549|447|957
GO Biological Process	GO:0001775	Cell activation	1075	30	0.0026	2.58503	NAMPT|ALDOC|LRRC8A|PSMB7|COTL1|CCT8|AGL|ARPC5|APEH|HPRT1|PRMT5|PKM|SNCA|GYG1|PRDX6|ACTB|PNP|ILF2|CSRP1|RAP1A|PREX1|PADI2|PPP3CA|ALDOA|CST3|GCA|ARRB1|PPIA|METTL7A|ACTG1	744|759|486|351|579|717|1083|765|1020|804|363|1026|453|591|471|975|849|309|873|498|1062|1089|870|858|438|390|855|420|675|957
GO Biological Process	GO:0034641	Cellular nitrogen compound metabolic process	3282	65	0.0027	2.56864	HSD17B10|AHCY|ACOT8|NAMPT|ALDOC|SPR|GDA|EIF2S3|PPP1R1B|PTCD3|MRPS36|NONO|MRPL49|HNMT|DENR|QDPR|APEH|HPRT1|TPP1|TERF2IP|DDB1|DPYSL2|PABPC1|GRHPR|CRAT|MPI|PRMT5|PKM|NPLOC4|LRRC16A|MRPL12|DLST|ACSL4|HNRNPA2B1|ALDH9A1|AGK|PNP|ILF2|NUCKS1|AHCYL1|RBMX|HSD17B8|SKIV2L|ACOT7|ACOT9|PDHA1|AK3|NADK2|FECH|ALDOA|DEK|FAM98B|PAICS|ALDH7A1|HDHD1|NAPEPLD|ARRB1|PARK7|PPIA|MRPS27|ENO2|DBI|LUC7L2|NUDT3|HIST1H4A	417|777|921|744|759|831|822|561|915|918|834|1077|1056|894|789|396|1020|804|510|600|450|801|639|993|411|951|363|1026|504|1014|879|1017|501|984|666|762|849|309|1074|627|462|333|432|723|687|660|846|900|825|858|927|696|684|783|1050|672|855|1023|420|726|549|534|795|330|708
GO Biological Process	GO:0032535	Regulation of cellular component size	383	16	0.0031	2.50864	LRRC8A|COTL1|SLC9A3R1|CAPZA1|ARPC5|CFL2|DPYSL2|LRRC16A|ARPC5L|EZR|PREX1|MAG|GRB2|RDX|CAPZB|SPTB	486|579|366|612|765|414|801|1014|981|807|1062|1053|738|342|657|447
GO Biological Process	GO:0051641	Cellular localization	2967	60	0.0034	2.46852	TIMM13|ACOT8|SCG3|CDC37|ALDOC|SKP1|PSMB7|SLC4A1|COTL1|SLC9A3R1|CAPZA1|SRI|SLC1A2|GJA1|ATP1B3|CCT8|AGL|ARPC5|APEH|JAM3|TPP1|TERF2IP|SNCB|CRAT|PKM|NPLOC4|SNCA|GYG1|PRDX6|HNRNPA2B1|AGK|ACTB|PNP|ILF2|AGT|EZR|SYT2|RAP1A|AHCYL1|MYO6|LGI1|FABP3|PADI2|KCNA1|PPP3CA|ALDOA|CST3|RDX|TF|PREPL|GCA|CAPZB|SEPT4|GPHN|PARK7|PPIA|EPHX2|METTL7A|SPTB|ACTG1	588|921|624|1005|759|642|351|540|579|366|612|741|1080|444|426|717|1083|765|1020|321|510|600|987|411|1026|504|453|591|471|984|762|975|849|309|843|807|1059|498|627|372|882|465|1089|384|870|858|438|342|633|381|390|657|567|909|1023|420|492|675|447|957
GO Biological Process	GO:0008064	Regulation of actin polymerization or depolymerization	189	11	0.0036	2.4437	COTL1|CAPZA1|ARPC5|CFL2|LRRC16A|ARPC5L|PREX1|GRB2|RDX|CAPZB|SPTB	579|612|765|414|1014|981|1062|738|342|657|447
GO Biological Process	GO:1901605	Alpha-amino acid metabolic process	191	11	0.0038	2.42022	AHCY|CRYM|HIBADH|GLUD1|HNMT|QDPR|GLUL|ALDH5A1|DLST|ALDH4A1|ALDH7A1	777|525|813|963|894|396|876|792|1017|720|783
GO Biological Process	GO:0070887	Cellular response to chemical stimulus	2919	59	0.0039	2.40894	PCK2|PIK3R2|NAMPT|SKP1|AKR7A2|SIRT2|HCN2|SLC27A1|SERPINF1|LRRC8A|PSMB7|SLC9A3R1|CAPZA1|TNC|ATP6V1B2|QDPR|GJA1|CA2|ELMO2|S100B|ADH5|TPP1|CYCS|PKM|SNCA|PRDX6|DPYSL3|HNRNPA2B1|ACTB|TPM1|STIP1|AGT|EZR|SYT2|RAP1A|AHCYL1|RBMX|PTPN1|PREX1|ATP6V1G1|PADI2|SERPINB9|KCNA1|PSME1|FECH|GRB2|HSPA2|PPP3CA|CST3|TXNRD2|RDX|HIST2H3A|TF|CRYZ|OXR1|GABRG2|PARK7|PPIA|ACTG1	585|966|744|642|522|969|318|429|771|486|351|366|612|528|546|396|444|945|729|531|423|510|1068|1026|453|471|609|984|975|852|537|843|807|1059|498|627|462|693|1062|732|1089|1104|384|402|825|738|594|870|438|912|342|477|633|828|819|399|1023|420|957
GO Biological Process	GO:0006637	acyl-CoA metabolic process	95	8	0.0039	2.40894	ACOT8|DLST|ACSL4|HSD17B8|ACOT7|ACOT9|PDHA1|DBI	921|1017|501|333|723|687|660|534
GO Biological Process	GO:0001505	Regulation of neurotransmitter levels	231	12	0.0042	2.37675	SLC1A3|SLC1A2|HNMT|GLUL|ALDH5A1|SNCA|ALDH9A1|SYT2|RAP1A|SNCG|PREPL|PARK7	663|1080|894|876|792|453|666|1059|498|648|381|1023
GO Biological Process	GO:0001504	Neurotransmitter uptake	27	5	0.0042	2.37675	SLC1A3|SLC1A2|GLUL|SNCA|PARK7	663|1080|876|453|1023
GO Biological Process	GO:0050896	Response to stimulus	8046	127	0.0045	2.34679	ST13|ACO2|PCK2|AHCY|CDC37|PIK3R2|NAMPT|ALDOC|SKP1|HSPE1|PPP3R1|AKR7A2|GNG13|SIRT2|HCN2|SLC27A1|PPP1R1B|SERPINF1|LRRC8A|PSMB7|PEBP1|PPP2R5A|SLC4A1|COTL1|SLC9A3R1|CAPZA1|SLC1A3|TNC|SRI|NONO|ATP6V1B2|SLC1A2|HNMT|QDPR|GJA1|CA2|CCT8|ELMO2|S100B|S100A1|AGL|ARPC5|ADH5|APEH|NDUFS4|HPRT1|JAM3|TPP1|TERF2IP|DDB1|SCN1A|CYCS|GLUL|SNCB|DPYSL2|ELMO1|PKM|FAIM2|NPLOC4|LRRC16A|SNCA|ACSL4|GYG1|PRDX6|DPYSL3|HNRNPA2B…	816|978|585|777|1005|966|744|759|642|570|714|522|690|969|318|429|915|771|486|351|654|837|540|579|366|612|663|528|741|1077|546|1080|894|396|444|945|717|729|531|375|1083|765|423|1020|954|804|321|510|600|450|885|1068|876|987|801|582|1026|936|504|1014|453|501|591|471|609|984|975|393|852|537|849|678|309|843|807|1074|1059|873|498|627|372|462|468|882|693|1062|354|465|732|888|1089|1104|846|384|402|825|10…
GO Biological Process	GO:0006887	Exocytosis	789	24	0.0045	2.34679	SCG3|ALDOC|PSMB7|COTL1|CCT8|AGL|ARPC5|APEH|LGI3|PKM|SNCA|GYG1|PRDX6|PNP|ILF2|SYT2|RAP1A|PADI2|ALDOA|CST3|TF|GCA|PPIA|METTL7A	624|759|351|579|717|1083|765|1020|474|1026|453|591|471|849|309|1059|498|1089|858|438|633|390|420|675
GO Biological Process	GO:0110053	Regulation of actin filament organization	273	13	0.0045	2.34679	COTL1|CAPZA1|ARPC5|CFL2|LRRC16A|ARPC5L|TPM1|PREX1|GRB2|RDX|CAPZB|SPTB|ACTG1	579|612|765|414|1014|981|852|1062|738|342|657|447|957
GO Biological Process	GO:0044242	Cellular lipid catabolic process	196	11	0.0045	2.34679	PCK2|ACOT8|DECR1|SIRT2|CRAT|PRDX6|ACAT2|ECHS1|FABP3|NAPEPLD|ECHDC1	585|921|1101|969|411|471|960|405|465|672|345
GO Biological Process	GO:0006807	Nitrogen compound metabolic process	6852	112	0.0047	2.3279	HSD17B10|AHCY|ACOT8|CRYM|SCG3|NAMPT|ALDOC|SKP1|PPP3R1|SPR|AKR7A2|GDA|SIRT2|SLC27A1|EIF2S3|PPP1R1B|PTCD3|MRPS36|LRRC8A|PSMB7|PEBP1|PPP2R5A|SLC1A3|TNC|HIBADH|L2HGDH|NONO|GLUD1|MRPL49|HNMT|DENR|QDPR|CTBP1|HDAC11|ADH5|APEH|HPRT1|TPP1|TERF2IP|DDB1|CYCS|GLUL|SNCB|DPYSL2|PABPC1|GRHPR|ALDH5A1|CRAT|MPI|PRMT5|PKM|PGP|NPLOC4|LRRC16A|MRPL12|DLST|SNCA|ACSL4|HNRNPA2B1|ALDH9A1|AGK|ACTB|PNP|ILF2|AGT|NUCKS1|PCMT1…	417|777|921|525|624|744|759|642|714|831|522|822|969|429|561|915|918|834|486|351|654|837|663|528|813|573|1077|963|1056|894|789|396|705|552|423|1020|804|510|600|450|1068|876|987|801|639|993|792|411|951|363|1026|780|504|1014|879|1017|453|501|984|666|762|975|849|309|843|1074|1071|627|462|693|333|720|432|1089|723|687|660|846|900|897|402|825|738|870|750|858|867|927|696|438|972|684|477|633|381|783|603|1…
GO Biological Process	GO:0071417	Cellular response to organonitrogen compound	590	20	0.0047	2.3279	PCK2|PIK3R2|NAMPT|SIRT2|HCN2|SLC9A3R1|ATP6V1B2|GJA1|CA2|PKM|SNCA|ACTB|AGT|EZR|RAP1A|AHCYL1|PTPN1|ATP6V1G1|GRB2|GABRG2	585|966|744|969|318|366|546|444|945|1026|453|975|843|807|498|627|693|732|738|399
GO Biological Process	GO:0002443	Leukocyte mediated immunity	641	21	0.0048	2.31876	ALDOC|PSMB7|COTL1|CCT8|AGL|ARPC5|APEH|HPRT1|PKM|GYG1|PRDX6|PNP|ILF2|RAP1A|PADI2|SERPINB9|ALDOA|CST3|GCA|PPIA|METTL7A	759|351|579|717|1083|765|1020|804|1026|591|471|849|309|498|1089|1104|858|438|390|420|675
GO Biological Process	GO:0009165	Nucleotide biosynthetic process	236	12	0.0048	2.31876	NAMPT|HPRT1|PKM|ACSL4|PNP|HSD17B8|ACOT7|PDHA1|AK3|NADK2|ALDOA|PAICS	744|804|1026|501|849|333|723|660|846|900|858|684
GO Biological Process	GO:0022607	Cellular component assembly	2359	50	0.0051	2.29243	HSD17B10|NDUFB7|ST13|SKP1|SIRT2|EIF2S3|LRRC8A|SLC9A3R1|CAPZA1|SLC1A2|DENR|GJA1|VBP1|CCT8|NDUFS4|CFL2|HPRT1|JAM3|DDB1|TMEM126A|PRMT5|NDUFV1|NDUFV2|LRRC16A|SNCA|DPYSL3|ALDH9A1|ACTB|TPM1|MT-ND1|EZR|CSRP1|RBMX|SGIP1|PREX1|RBBP4|HSD17B8|KCNA1|ALDOA|RDX|HIST2H3A|FAM96B|CRYZ|ARRB1|GABRG2|UQCRB|LUC7L2|ACTG1|MARCKS|HIST1H4A	417|558|816|642|969|561|486|366|612|1080|789|444|747|717|954|414|804|321|450|315|363|327|933|1014|453|609|666|975|852|678|807|873|462|468|1062|354|333|384|858|342|477|603|828|855|399|378|795|957|513|708
GO Biological Process	GO:0038096	Fc-gamma receptor signaling pathway involved in phagocytosis	73	7	0.0051	2.29243	PIK3R2|ELMO2|ARPC5|ELMO1|ACTB|GRB2|ACTG1	966|729|765|582|975|738|957
GO Biological Process	GO:0031333	Negative regulation of protein-containing complex assembly	133	9	0.0054	2.26761	SIRT2|CAPZA1|JAM3|SNCA|LCMT1|RDX|CAPZB|PARK7|SPTB	969|612|321|453|972|342|657|1023|447
GO Biological Process	GO:0007399	Nervous system development	2371	50	0.0055	2.25964	GDA|COX6B1|SIRT2|SERPINF1|SLC9A3R1|SLC1A3|TNC|GLUD1|SLC1A2|HNMT|GJA1|S100B|S100A1|ARPC5|HDAC11|SERPINI1|NDUFS4|HPRT1|JAM3|TPP1|TMEM126A|DPYSL2|LGI4|ALDH5A1|PRMT5|BASP1|FAIM2|NDUFV2|ACSL4|DPYSL3|ACTB|AGT|EZR|SYT2|NAV1|RAP1A|MYO6|OPALIN|LGI1|PREX1|PADI2|KCNA1|MAG|GRB2|PPP3CA|CST3|DAAM2|GABRG2|NDRG2|SPTB	822|798|969|771|366|663|528|963|1080|894|444|531|375|765|552|645|954|804|321|510|315|801|630|792|363|324|936|933|501|609|975|843|807|1059|906|498|372|774|882|1062|1089|384|1053|738|870|438|1086|399|615|447
GO Biological Process	GO:0002252	Immune effector process	969	27	0.0055	2.25964	PIK3R2|ALDOC|PSMB7|COTL1|CCT8|ELMO2|AGL|ARPC5|APEH|HPRT1|ELMO1|PKM|GYG1|PRDX6|ACTB|PNP|ILF2|RAP1A|PADI2|SERPINB9|GRB2|ALDOA|CST3|GCA|PPIA|METTL7A|ACTG1	966|759|351|579|717|729|1083|765|1020|804|582|1026|591|471|975|849|309|498|1089|1104|738|858|438|390|420|675|957
GO Biological Process	GO:0072523	Purine-containing compound catabolic process	50	6	0.0055	2.25964	AHCY|GDA|HPRT1|PNP|ACOT7|NUDT3	777|822|804|849|723|330
GO Biological Process	GO:0042592	Homeostatic process	1676	39	0.0056	2.25181	PCK2|PIK3R2|SKP1|SERPINF1|LRRC8A|SLC4A1|SLC9A3R1|SRI|ATP6V1B2|GJA1|CA2|ATP1B3|CFL2|JAM3|TPP1|TERF2IP|DDB1|CALB2|SNCA|PRDX6|ACTB|AGT|NUCKS1|SGIP1|FABP3|ATP6V1G1|KCNA1|PPP3CA|BCKDK|ALDOA|TXNRD2|TF|SLC4A4|NAPEPLD|PARK7|EPHX2|ACTG1|TPT1|HIST1H4A	585|966|642|771|486|540|366|741|546|444|945|426|414|321|510|600|450|456|453|471|975|843|1074|468|465|732|384|870|750|858|912|633|576|672|1023|492|957|555|708
GO Biological Process	GO:1902903	Regulation of supramolecular fiber organization	368	15	0.0056	2.25181	COTL1|CAPZA1|ARPC5|CFL2|LRRC16A|SNCA|ARPC5L|TPM1|PREX1|GRB2|RDX|CAPZB|PARK7|SPTB|ACTG1	579|612|765|414|1014|453|981|852|1062|738|342|657|1023|447|957
GO Biological Process	GO:0006066	Alcohol metabolic process	324	14	0.0056	2.25181	ACO2|PCK2|IDH3G|SPR|AKR7A2|ALDH2|QDPR|ADH5|ALDH1A1|PGP|ACAT2|NAPEPLD|PARK7|NUDT3	978|585|1047|831|522|999|396|423|1011|780|960|672|1023|330
GO Biological Process	GO:0072522	Purine-containing compound biosynthetic process	169	10	0.0056	2.25181	HPRT1|PKM|ACSL4|PNP|HSD17B8|ACOT7|PDHA1|AK3|ALDOA|PAICS	804|1026|501|849|333|723|660|846|858|684
GO Biological Process	GO:0030834	Regulation of actin filament depolymerization	51	6	0.0057	2.24413	CAPZA1|CFL2|LRRC16A|RDX|CAPZB|SPTB	612|414|1014|342|657|447
GO Biological Process	GO:0030833	Regulation of actin filament polymerization	173	10	0.0066	2.18046	COTL1|CAPZA1|ARPC5|LRRC16A|ARPC5L|PREX1|GRB2|RDX|CAPZB|SPTB	579|612|765|1014|981|1062|738|342|657|447
GO Biological Process	GO:0090066	Regulation of anatomical structure size	516	18	0.0069	2.16115	LRRC8A|COTL1|SLC9A3R1|CAPZA1|GJA1|ARPC5|CFL2|DPYSL2|LRRC16A|ARPC5L|AGT|EZR|PREX1|MAG|GRB2|RDX|CAPZB|SPTB	486|579|366|612|444|765|414|801|1014|981|843|807|1062|1053|738|342|657|447
GO Biological Process	GO:0010033	Response to organic substance	3011	59	0.0073	2.13668	PCK2|PIK3R2|NAMPT|SKP1|HSPE1|SIRT2|HCN2|SLC27A1|PPP1R1B|SERPINF1|PSMB7|SLC9A3R1|CAPZA1|TNC|ATP6V1B2|SLC1A2|HNMT|QDPR|GJA1|CA2|S100B|AGL|ADH5|NDUFS4|HPRT1|TPP1|GLUL|PKM|NPLOC4|SNCA|ACSL4|DPYSL3|HNRNPA2B1|ACTB|STIP1|MT-ND1|AGT|EZR|RAP1A|AHCYL1|RBMX|PTPN1|RBBP4|FABP3|ATP6V1G1|PADI2|SERPINB9|PSME1|FECH|GRB2|HSPA2|PPP3CA|CST3|RDX|HIST2H3A|GABRG2|PARK7|PPIA|ACTG1	585|966|744|642|570|969|318|429|915|771|351|366|612|528|546|1080|894|396|444|945|531|1083|423|954|804|510|876|1026|504|453|501|609|984|975|537|678|843|807|498|627|462|693|354|465|732|1089|1104|402|825|738|594|870|438|342|477|399|1023|420|957
GO Biological Process	GO:0019395	Fatty acid oxidation	80	7	0.0075	2.12494	ACOT8|DECR1|ADH5|CRAT|ACAT2|ECHS1|ECHDC1	921|1101|423|411|960|405|345
GO Biological Process	GO:0034654	Nucleobase-containing compound biosynthetic process	995	27	0.0077	2.11351	NAMPT|GDA|PPP1R1B|HPRT1|TERF2IP|MPI|PRMT5|PKM|NPLOC4|MRPL12|ACSL4|PNP|ILF2|RBMX|HSD17B8|ACOT7|PDHA1|AK3|NADK2|ALDOA|DEK|PAICS|HDHD1|ARRB1|PPIA|NUDT3|HIST1H4A	744|822|915|804|600|951|363|1026|504|879|501|849|309|462|333|723|660|846|900|858|927|684|1050|855|420|330|708
GO Biological Process	GO:1901701	Cellular response to oxygen-containing compound	1055	28	0.0081	2.09151	PCK2|PIK3R2|NAMPT|SIRT2|HCN2|SERPINF1|SLC9A3R1|TNC|ATP6V1B2|GJA1|CA2|ADH5|PKM|SNCA|ACTB|TPM1|AGT|EZR|RAP1A|AHCYL1|PTPN1|ATP6V1G1|FECH|GRB2|PPP3CA|CST3|OXR1|PARK7	585|966|744|969|318|771|366|528|546|444|945|423|1026|453|975|852|843|807|498|627|693|732|825|738|870|438|819|1023
GO Biological Process	GO:0051049	Regulation of transport	1776	40	0.0083	2.08092	PIK3R2|PPP3R1|HCN2|SLC9A3R1|SRI|GLUD1|SLC1A2|GJA1|CA2|ATP1B3|S100A1|LGI3|SCN1A|GLUL|SNCA|ACSL4|ACTB|GRM7|AGT|EZR|SYT2|RAP1A|AHCYL1|MYO6|SMAP1|SGIP1|PTPN1|SNCG|FABP3|KCNA1|HSPA2|PPP3CA|RDX|TF|PREPL|SEPT4|ARRB1|PARK7|PPIA|DBI	966|714|318|366|741|963|1080|444|945|426|375|474|885|876|453|501|975|393|843|807|1059|498|627|372|840|468|693|648|465|384|594|870|342|633|381|567|855|1023|420|534
GO Biological Process	GO:0006635	Fatty acid beta-oxidation	56	6	0.0085	2.07058	ACOT8|DECR1|CRAT|ACAT2|ECHS1|ECHDC1	921|1101|411|960|405|345
GO Biological Process	GO:0006575	Cellular modified amino acid metabolic process	180	10	0.0086	2.0655	AHCY|CRYM|SLC27A1|CRAT|ALDH9A1|ALDH4A1|GATM|ALDH7A1|GAMT|PARK7	777|525|429|411|666|720|867|783|339|1023
GO Biological Process	GO:0019725	Cellular homeostasis	895	25	0.0089	2.05061	PCK2|PIK3R2|SKP1|SERPINF1|LRRC8A|SLC4A1|SLC9A3R1|SRI|ATP6V1B2|GJA1|CA2|ATP1B3|CFL2|CALB2|SNCA|PRDX6|AGT|NUCKS1|ATP6V1G1|PPP3CA|ALDOA|TXNRD2|TF|SLC4A4|TPT1	585|966|642|771|486|540|366|741|546|444|945|426|414|456|453|471|843|1074|732|870|858|912|633|576|555
GO Biological Process	GO:0009611	Response to wounding	532	18	0.0094	2.02687	SLC4A1|CAPZA1|SLC1A3|TNC|SLC1A2|JAM3|LRRC16A|DPYSL3|ACTB|TPM1|CSRP1|AK3|MAG|CST3|HIST2H3A|CAPZB|ARRB1|ACTG1	540|612|663|528|1080|321|1014|609|975|852|873|846|1053|438|477|657|855|957
GO Biological Process	GO:0032970	Regulation of actin filament-based process	390	15	0.0094	2.02687	COTL1|CAPZA1|SRI|ARPC5|CFL2|JAM3|LRRC16A|ARPC5L|TPM1|PREX1|GRB2|RDX|CAPZB|SPTB|ACTG1	579|612|741|765|414|321|1014|981|852|1062|738|342|657|447|957
GO Biological Process	GO:0072330	Monocarboxylic acid biosynthetic process	183	10	0.0094	2.02687	ACOT8|SLC1A3|PKM|PTGDS|HSD17B8|ACOT7|GATM|GAMT|PARK7|EPHX2	921|663|1026|702|333|723|867|339|1023|492
GO Biological Process	GO:0009152	Purine ribonucleotide biosynthetic process	147	9	0.0094	2.02687	HPRT1|PKM|ACSL4|HSD17B8|ACOT7|PDHA1|AK3|ALDOA|PAICS	804|1026|501|333|723|660|846|858|684
GO Biological Process	GO:0015800	Acidic amino acid transport	58	6	0.0096	2.01773	LRRC8A|SLC9A3R1|SLC1A3|SLC1A2|GJA1|SLC25A18	486|366|663|1080|444|636
GO Biological Process	GO:0033043	Regulation of organelle organization	1306	32	0.0098	2.00877	CDC37|PPP3R1|SIRT2|COTL1|CAPZA1|CCT8|CTBP1|ARPC5|CFL2|JAM3|TERF2IP|PRMT5|CHORDC1|LRRC16A|SNCA|ARPC5L|HNRNPA2B1|TPM1|EZR|PREX1|PADI2|GRB2|CCT4|LCMT1|RDX|CAPZB|ARRB1|PARK7|TMEM33|ENO2|SPTB|ACTG1	1005|714|969|579|612|717|705|765|414|321|600|363|564|1014|453|981|984|852|807|1062|1089|738|348|972|342|657|855|1023|786|549|447|957
GO Biological Process	GO:0009725	Response to hormone	849	24	0.0098	2.00877	PCK2|PIK3R2|SLC27A1|SERPINF1|TNC|ATP6V1B2|HNMT|QDPR|GJA1|CA2|S100B|AGL|PKM|AGT|AHCYL1|PTPN1|RBBP4|FABP3|ATP6V1G1|PADI2|SERPINB9|FECH|GRB2|RDX	585|966|429|771|528|546|894|396|444|945|531|1083|1026|843|627|693|354|465|732|1089|1104|825|738|342
GO Biological Process	GO:0043434	Response to peptide hormone	394	15	0.0098	2.00877	PCK2|PIK3R2|SLC27A1|ATP6V1B2|QDPR|GJA1|CA2|PKM|AGT|AHCYL1|PTPN1|RBBP4|FABP3|ATP6V1G1|GRB2	585|966|429|546|396|444|945|1026|843|627|693|354|465|732|738
GO Biological Process	GO:0032956	Regulation of actin cytoskeleton organization	348	14	0.0098	2.00877	COTL1|CAPZA1|ARPC5|CFL2|JAM3|LRRC16A|ARPC5L|TPM1|PREX1|GRB2|RDX|CAPZB|SPTB|ACTG1	579|612|765|414|321|1014|981|852|1062|738|342|657|447|957
GO Biological Process	GO:0043269	Regulation of ion transport	696	21	0.011	1.95861	HCN2|SLC9A3R1|SRI|GJA1|CA2|ATP1B3|S100A1|SCN1A|SNCA|ACSL4|GRM7|AGT|SYT2|AHCYL1|SNCG|FABP3|KCNA1|HSPA2|TF|PARK7|DBI	318|366|741|444|945|426|375|885|453|501|393|843|1059|627|648|465|384|594|633|1023|534
GO Biological Process	GO:0072329	Monocarboxylic acid catabolic process	118	8	0.011	1.95861	PCK2|ACOT8|DECR1|ALDH5A1|CRAT|ACAT2|ECHS1|ECHDC1	585|921|1101|792|411|960|405|345
GO Biological Process	GO:0022898	Regulation of transmembrane transporter activity	269	12	0.0115	1.9393	SLC9A3R1|SRI|GJA1|ATP1B3|S100A1|SNCA|ACTB|AGT|AHCYL1|KCNA1|HSPA2|PARK7	366|741|444|426|375|453|975|843|627|384|594|1023
GO Biological Process	GO:0042326	Negative regulation of phosphorylation	449	16	0.0117	1.93181	PIK3R2|SIRT2|PPP1R1B|PEBP1|PPP2R5A|SLC4A1|SLC9A3R1|TERF2IP|CHORDC1|SNCA|AGT|EZR|PTPN1|ARRB1|PARK7|NDRG2	966|969|915|654|837|540|366|600|564|453|843|807|693|855|1023|615
GO Biological Process	GO:0009628	Response to abiotic stimulus	1147	29	0.0118	1.92812	AHCY|NAMPT|SIRT2|SLC27A1|PPP1R1B|SERPINF1|LRRC8A|PSMB7|SLC1A3|TNC|SLC1A2|HNMT|GJA1|CA2|S100B|DDB1|SCN1A|PKM|AGT|NUCKS1|ATP6V1G1|KCNA1|PSME1|FECH|MAG|GRB2|HSPA2|CST3|ARRB1	777|744|969|429|915|771|486|351|663|528|1080|894|444|945|531|450|885|1026|843|1074|732|384|402|825|1053|738|594|438|855
GO Biological Process	GO:0043254	Regulation of protein-containing complex assembly	451	16	0.0121	1.91721	SIRT2|COTL1|CAPZA1|ARPC5|JAM3|DDB1|LRRC16A|SNCA|ARPC5L|PREX1|GRB2|LCMT1|RDX|CAPZB|PARK7|SPTB	969|579|612|765|321|450|1014|453|981|1062|738|972|342|657|1023|447
GO Biological Process	GO:0006725	Cellular aromatic compound metabolic process	2882	56	0.0123	1.91009	HSD17B10|AHCY|ACOT8|CRYM|NAMPT|ALDOC|SPR|AKR7A2|GDA|PPP1R1B|NONO|HNMT|QDPR|HPRT1|TERF2IP|DDB1|SNCB|DPYSL2|PABPC1|MPI|PRMT5|PKM|NPLOC4|LRRC16A|MRPL12|DLST|SNCA|ACSL4|HNRNPA2B1|PNP|ILF2|NUCKS1|AHCYL1|RBMX|HSD17B8|SKIV2L|ACOT7|ACOT9|PDHA1|AK3|NADK2|FECH|ALDOA|DEK|FAM98B|PAICS|HDHD1|ARRB1|PARK7|PPIA|EPHX2|ENO2|DBI|LUC7L2|NUDT3|HIST1H4A	417|777|921|525|744|759|831|522|822|915|1077|894|396|804|600|450|987|801|639|951|363|1026|504|1014|879|1017|453|501|984|849|309|1074|627|462|333|432|723|687|660|846|900|825|858|927|696|684|1050|855|1023|420|492|549|534|795|330|708
GO Biological Process	GO:0051262	Protein tetramerization	90	7	0.0125	1.90309	HSD17B10|HPRT1|SNCA|ALDH9A1|HSD17B8|ALDOA|CRYZ	417|804|453|666|333|858|828
GO Biological Process	GO:0032271	Regulation of protein polymerization	232	11	0.0126	1.89963	COTL1|CAPZA1|ARPC5|LRRC16A|SNCA|ARPC5L|PREX1|GRB2|RDX|CAPZB|SPTB	579|612|765|1014|453|981|1062|738|342|657|447
GO Biological Process	GO:0045321	Leukocyte activation	929	25	0.0135	1.86967	NAMPT|ALDOC|LRRC8A|PSMB7|COTL1|CCT8|AGL|ARPC5|APEH|HPRT1|PKM|SNCA|GYG1|PRDX6|PNP|ILF2|RAP1A|PREX1|PADI2|PPP3CA|ALDOA|CST3|GCA|PPIA|METTL7A	744|759|486|351|579|717|1083|765|1020|804|1026|453|591|471|849|309|498|1062|1089|870|858|438|390|420|675
GO Biological Process	GO:0051259	Protein complex oligomerization	236	11	0.0143	1.84466	HSD17B10|LRRC8A|SLC1A2|HPRT1|SNCA|ALDH9A1|RBMX|HSD17B8|KCNA1|ALDOA|CRYZ	417|486|1080|804|453|666|462|333|384|858|828
GO Biological Process	GO:0009062	Fatty acid catabolic process	93	7	0.0146	1.83565	PCK2|ACOT8|DECR1|CRAT|ACAT2|ECHS1|ECHDC1	585|921|1101|411|960|405|345
GO Biological Process	GO:0010038	Response to metal ion	367	14	0.0147	1.83268	SERPINF1|QDPR|CA2|SNCB|SNCA|SYT2|AHCYL1|CUTA|KCNA1|FECH|PPP3CA|TF|GPHN|PARK7	771|396|945|987|453|1059|627|888|384|825|870|633|909|1023
GO Biological Process	GO:0034767	Positive regulation of ion transmembrane transport	160	9	0.0147	1.83268	SLC9A3R1|SRI|ATP1B3|S100A1|SNCA|AGT|KCNA1|HSPA2|PARK7	366|741|426|375|453|843|384|594|1023
GO Biological Process	GO:1901360	Organic cyclic compound metabolic process	3118	59	0.015	1.82391	HSD17B10|AHCY|ACOT8|CRYM|NAMPT|ALDOC|SPR|AKR7A2|GDA|PPP1R1B|NONO|HNMT|QDPR|HPRT1|TERF2IP|DDB1|SNCB|DPYSL2|PABPC1|MPI|PRMT5|PKM|NPLOC4|LRRC16A|MRPL12|DLST|SNCA|ACSL4|HNRNPA2B1|PNP|ILF2|ACAT2|NUCKS1|AHCYL1|RBMX|HSD17B8|ALDH4A1|SKIV2L|ACOT7|ACOT9|PDHA1|AK3|NADK2|FECH|ALDOA|DEK|FAM98B|PAICS|HDHD1|ARRB1|GPHN|PARK7|PPIA|EPHX2|ENO2|DBI|LUC7L2|NUDT3|HIST1H4A	417|777|921|525|744|759|831|522|822|915|1077|894|396|804|600|450|987|801|639|951|363|1026|504|1014|879|1017|453|501|984|849|309|960|1074|627|462|333|720|432|723|687|660|846|900|825|858|927|696|684|1050|855|909|1023|420|492|549|534|795|330|708
GO Biological Process	GO:0051649	Establishment of localization in cell	2375	48	0.0158	1.80134	TIMM13|ACOT8|SCG3|CDC37|ALDOC|PSMB7|COTL1|SLC9A3R1|CAPZA1|SLC1A2|GJA1|CCT8|AGL|ARPC5|APEH|SNCB|CRAT|PKM|NPLOC4|SNCA|GYG1|PRDX6|HNRNPA2B1|AGK|ACTB|PNP|ILF2|AGT|EZR|SYT2|RAP1A|AHCYL1|MYO6|FABP3|PADI2|PPP3CA|ALDOA|CST3|TF|PREPL|GCA|CAPZB|PARK7|PPIA|EPHX2|METTL7A|SPTB|ACTG1	588|921|624|1005|759|351|579|366|612|1080|444|717|1083|765|1020|987|411|1026|504|453|591|471|984|762|975|849|309|843|807|1059|498|627|372|465|1089|870|858|438|633|381|390|657|1023|420|492|675|447|957
GO Biological Process	GO:0032981	Mitochondrial respiratory chain complex i assembly	66	6	0.0158	1.80134	NDUFB7|NDUFS4|TMEM126A|NDUFV1|NDUFV2|MT-ND1	558|954|315|327|933|678
GO Biological Process	GO:0044085	Cellular component biogenesis	2583	51	0.0165	1.78252	HSD17B10|NDUFB7|ST13|SKP1|SIRT2|EIF2S3|LRRC8A|SLC9A3R1|CAPZA1|SLC1A2|DENR|GJA1|VBP1|CCT8|NDUFS4|CFL2|HPRT1|JAM3|DDB1|TMEM126A|GLUL|PRMT5|NDUFV1|NDUFV2|LRRC16A|SNCA|DPYSL3|ALDH9A1|ACTB|TPM1|MT-ND1|EZR|CSRP1|RBMX|SGIP1|PREX1|RBBP4|HSD17B8|KCNA1|ALDOA|RDX|HIST2H3A|FAM96B|CRYZ|ARRB1|GABRG2|UQCRB|LUC7L2|ACTG1|MARCKS|HIST1H4A	417|558|816|642|969|561|486|366|612|1080|789|444|747|717|954|414|804|321|450|315|876|363|327|933|1014|453|609|666|975|852|678|807|873|462|468|1062|354|333|384|858|342|477|603|828|855|399|378|795|957|513|708
GO Biological Process	GO:0098657	Import into cell	164	9	0.0166	1.77989	HCN2|SLC27A1|SLC7A5|SLC1A3|SLC1A2|ATP1B3|GLUL|SNCA|PARK7	318|429|459|663|1080|426|876|453|1023
GO Biological Process	GO:0032870	Cellular response to hormone stimulus	569	18	0.0167	1.77728	PCK2|PIK3R2|SLC27A1|SERPINF1|TNC|ATP6V1B2|GJA1|CA2|PKM|AGT|AHCYL1|PTPN1|ATP6V1G1|PADI2|SERPINB9|FECH|GRB2|RDX	585|966|429|771|528|546|444|945|1026|843|627|693|732|1089|1104|825|738|342
GO Biological Process	GO:0043270	Positive regulation of ion transport	285	12	0.0168	1.77469	SLC9A3R1|SRI|ATP1B3|S100A1|SNCA|AGT|AHCYL1|FABP3|KCNA1|HSPA2|PARK7|DBI	366|741|426|375|453|843|627|465|384|594|1023|534
GO Biological Process	GO:0043090	Amino acid import	22	4	0.0168	1.77469	SLC7A5|SLC9A3R1|SLC1A3|SLC1A2	459|366|663|1080
GO Biological Process	GO:1901565	Organonitrogen compound catabolic process	1070	27	0.0178	1.74958	HSD17B10|AHCY|CRYM|SKP1|GDA|SIRT2|PSMB7|HIBADH|GLUD1|HNMT|QDPR|HPRT1|TPP1|DDB1|GLUL|ALDH5A1|NPLOC4|DLST|PNP|ALDH4A1|ACOT7|FBXL18|PSME1|BCKDK|ALDH7A1|ARRB1|NUDT3	417|777|525|642|822|969|351|813|963|894|396|804|510|450|876|792|504|1017|849|720|723|897|402|750|783|855|330
GO Biological Process	GO:0006195	Purine nucleotide catabolic process	43	5	0.0178	1.74958	GDA|HPRT1|PNP|ACOT7|NUDT3	822|804|849|723|330
GO Biological Process	GO:0046130	Purine ribonucleoside catabolic process	8	3	0.0178	1.74958	AHCY|HPRT1|PNP	777|804|849
GO Biological Process	GO:0006090	Pyruvate metabolic process	69	6	0.0181	1.74232	PCK2|ALDOC|PKM|PDHA1|ALDOA|ENO2	585|759|1026|660|858|549
GO Biological Process	GO:1901652	Response to peptide	476	16	0.0183	1.73755	PCK2|PIK3R2|NAMPT|SLC27A1|ATP6V1B2|QDPR|GJA1|CA2|PKM|AGT|AHCYL1|PTPN1|RBBP4|FABP3|ATP6V1G1|GRB2	585|966|744|429|546|396|444|945|1026|843|627|693|354|465|732|738
GO Biological Process	GO:0046394	Carboxylic acid biosynthetic process	290	12	0.0183	1.73755	ACOT8|SLC1A3|GLUD1|GLUL|PKM|PTGDS|HSD17B8|ACOT7|GATM|GAMT|PARK7|EPHX2	921|663|963|876|1026|702|333|723|867|339|1023|492
GO Biological Process	GO:0051046	Regulation of secretion	686	20	0.0194	1.7122	SLC9A3R1|SRI|GLUD1|GJA1|LGI3|GLUL|SNCA|ACSL4|GRM7|AGT|EZR|SYT2|RAP1A|MYO6|SNCG|PPP3CA|PREPL|SEPT4|ARRB1|PPIA	366|741|963|444|474|876|453|501|393|843|807|1059|498|372|648|870|381|567|855|420
GO Biological Process	GO:0061024	Membrane organization	796	22	0.0197	1.70553	TIMM13|PPP3R1|MTX2|PMP2|SLC4A1|SLC9A3R1|ARPC5|ELMO1|SNCA|AGK|ACTB|SYT2|SGIP1|GRB2|TF|GCA|ARRB1|FNBP1|GPHN|PPIA|TMEM33|ACTG1	588|714|516|768|540|366|765|582|453|762|975|1059|468|738|633|390|855|1107|909|420|786|957
GO Biological Process	GO:0019674	NAD metabolic process	45	5	0.0202	1.69465	ALDOC|PKM|NADK2|ALDOA|ENO2	759|1026|900|858|549
GO Biological Process	GO:0042398	Cellular modified amino acid biosynthetic process	45	5	0.0202	1.69465	SLC27A1|ALDH9A1|GATM|ALDH7A1|GAMT	429|666|867|783|339
GO Biological Process	GO:0014070	Response to organic cyclic compound	911	24	0.0204	1.69037	PCK2|NAMPT|SIRT2|HCN2|PPP1R1B|SERPINF1|SLC9A3R1|TNC|HNMT|GJA1|CA2|S100B|AGL|NDUFS4|SNCA|ACTB|MT-ND1|AGT|EZR|RAP1A|PADI2|FECH|CST3|GABRG2	585|744|969|318|915|771|366|528|894|444|945|531|1083|954|453|975|678|843|807|498|1089|825|438|399
GO Biological Process	GO:0009719	Response to endogenous stimulus	1447	33	0.0206	1.68613	PCK2|PIK3R2|NAMPT|SIRT2|HCN2|SLC27A1|SERPINF1|SLC9A3R1|TNC|ATP6V1B2|HNMT|QDPR|GJA1|CA2|S100B|AGL|PKM|SNCA|ACTB|AGT|EZR|RAP1A|AHCYL1|PTPN1|RBBP4|FABP3|ATP6V1G1|PADI2|SERPINB9|FECH|GRB2|RDX|GABRG2	585|966|744|969|318|429|771|366|528|546|894|396|444|945|531|1083|1026|453|975|843|807|498|627|693|354|465|732|1089|1104|825|738|342|399
GO Biological Process	GO:0033108	Mitochondrial respiratory chain complex assembly	102	7	0.0206	1.68613	NDUFB7|NDUFS4|TMEM126A|NDUFV1|NDUFV2|MT-ND1|UQCRB	558|954|315|327|933|678|378
GO Biological Process	GO:0030534	Adult behavior	136	8	0.0208	1.68194	PPP1R1B|SLC1A2|SCN1A|LGI4|SNCG|OXR1|GABRG2|PARK7	915|1080|885|630|648|819|399|1023
GO Biological Process	GO:0044070	Regulation of anion transport	103	7	0.0216	1.66555	CA2|ACSL4|GRM7|AGT|AHCYL1|FABP3|DBI	945|501|393|843|627|465|534
GO Biological Process	GO:0046483	Heterocycle metabolic process	2840	54	0.0225	1.64782	HSD17B10|AHCY|ACOT8|NAMPT|ALDOC|SPR|GDA|PPP1R1B|NONO|HNMT|QDPR|HPRT1|TERF2IP|DDB1|DPYSL2|PABPC1|MPI|PRMT5|PKM|NPLOC4|LRRC16A|MRPL12|DLST|ACSL4|HNRNPA2B1|PNP|ILF2|NUCKS1|AHCYL1|RBMX|HSD17B8|ALDH4A1|SKIV2L|ACOT7|ACOT9|PDHA1|AK3|NADK2|FECH|ALDOA|DEK|FAM98B|PAICS|HDHD1|ARRB1|GPHN|PARK7|PPIA|EPHX2|ENO2|DBI|LUC7L2|NUDT3|HIST1H4A	417|777|921|744|759|831|822|915|1077|894|396|804|600|450|801|639|951|363|1026|504|1014|879|1017|501|984|849|309|1074|627|462|333|720|432|723|687|660|846|900|825|858|927|696|684|1050|855|909|1023|420|492|549|534|795|330|708
GO Biological Process	GO:0050954	Sensory perception of mechanical stimulus	175	9	0.0225	1.64782	TIMM13|CRYM|SLC9A3R1|SLC1A3|SCN1A|GRM7|MYO6|KCNA1|ALDH7A1	588|525|366|663|885|393|372|384|783
GO Biological Process	GO:0032024	Positive regulation of insulin secretion	74	6	0.0236	1.62709	SRI|GLUD1|GJA1|GLUL|ACSL4|ARRB1	741|963|444|876|501|855
GO Biological Process	GO:0006950	Response to stress	3485	63	0.0246	1.60906	ACO2|PCK2|AHCY|CDC37|PIK3R2|NAMPT|SKP1|HSPE1|SIRT2|SLC27A1|LRRC8A|PSMB7|SLC4A1|COTL1|CAPZA1|SLC1A3|TNC|NONO|SLC1A2|HNMT|GJA1|CA2|S100B|ADH5|JAM3|TPP1|TERF2IP|DDB1|CYCS|GLUL|PKM|FAIM2|NPLOC4|LRRC16A|SNCA|PRDX6|DPYSL3|ACTB|TPM1|MT-ND1|AGT|NUCKS1|CSRP1|MYO6|PTPN1|AK3|PSME1|MAG|GRB2|HSPA2|PPP3CA|CST3|TXNRD2|HIST2H3A|TF|CAPZB|OXR1|NAPEPLD|ARRB1|PARK7|TMEM33|ACTG1|HIST1H4A	978|585|777|1005|966|744|642|570|969|429|486|351|540|579|612|663|528|1077|1080|894|444|945|531|423|321|510|600|450|1068|876|1026|936|504|1014|453|471|609|975|852|678|843|1074|873|372|693|846|402|1053|738|594|870|438|912|477|633|657|819|672|855|1023|786|957|708
GO Biological Process	GO:0048488	Synaptic vesicle endocytosis	48	5	0.0252	1.5986	SNCB|SNCA|ACTB|SYT2|ACTG1	987|453|975|1059|957
GO Biological Process	GO:0007417	Central nervous system development	988	25	0.0259	1.5867	COX6B1|SIRT2|GLUD1|SLC1A2|HNMT|S100B|S100A1|ARPC5|HDAC11|SERPINI1|NDUFS4|HPRT1|TPP1|DPYSL2|ALDH5A1|BASP1|FAIM2|ACTB|PADI2|KCNA1|MAG|PPP3CA|CST3|DAAM2|NDRG2	798|969|963|1080|894|531|375|765|552|645|954|804|510|801|792|324|936|975|1089|384|1053|870|438|1086|615
GO Biological Process	GO:0030258	Lipid modification	220	10	0.0265	1.57675	ACOT8|DECR1|PIK3R2|ADH5|CRAT|AGK|ACAT2|ECHS1|EPHX2|ECHDC1	921|1101|966|423|411|762|960|405|492|345
GO Biological Process	GO:0006120	Mitochondrial electron transport, nadh to ubiquinone	49	5	0.0269	1.57025	NDUFB7|NDUFS4|NDUFV1|NDUFV2|MT-ND1	558|954|327|933|678
GO Biological Process	GO:0046031	ADP metabolic process	49	5	0.0269	1.57025	ALDOC|PKM|AK3|ALDOA|ENO2	759|1026|846|858|549
GO Biological Process	GO:0061621	Canonical glycolysis	27	4	0.0285	1.54516	ALDOC|PKM|ALDOA|ENO2	759|1026|858|549
GO Biological Process	GO:1904064	Positive regulation of cation transmembrane transport	145	8	0.029	1.5376	SRI|ATP1B3|S100A1|SNCA|AGT|KCNA1|HSPA2|PARK7	741|426|375|453|843|384|594|1023
GO Biological Process	GO:0043603	Cellular amide metabolic process	773	21	0.0303	1.51856	ACOT8|EIF2S3|PTCD3|MRPS36|MRPL49|DENR|APEH|TPP1|PABPC1|MRPL12|DLST|ACSL4|AGK|HSD17B8|ACOT7|ACOT9|PDHA1|NAPEPLD|PARK7|MRPS27|DBI	921|561|918|834|1056|789|1020|510|639|879|1017|501|762|333|723|687|660|672|1023|726|534
GO Biological Process	GO:0051341	Regulation of oxidoreductase activity	111	7	0.0305	1.5157	SPR|SLC4A1|S100A1|SNCA|AGT|BCKDK|PARK7	831|540|375|453|843|750|1023
GO Biological Process	GO:0019320	Hexose catabolic process	51	5	0.0307	1.51286	ALDOC|ALDH1A1|PKM|ALDOA|ENO2	759|1011|1026|858|549
GO Biological Process	GO:0048678	Response to axon injury	51	5	0.0307	1.51286	TNC|JAM3|DPYSL3|MAG|CST3	528|321|609|1053|438
GO Biological Process	GO:0034762	Regulation of transmembrane transport	560	17	0.0311	1.50724	HCN2|SLC9A3R1|SRI|SLC1A2|GJA1|CA2|ATP1B3|S100A1|SCN1A|SNCA|ACTB|AGT|RAP1A|AHCYL1|KCNA1|HSPA2|PARK7	318|366|741|1080|444|945|426|375|885|453|975|843|498|627|384|594|1023
GO Biological Process	GO:0015740	C4-dicarboxylate transport	28	4	0.0311	1.50724	LRRC8A|SLC1A3|SLC1A2|SLC25A18	486|663|1080|636
GO Biological Process	GO:0070778	L-aspartate transmembrane transport	11	3	0.0312	1.50585	SLC1A3|SLC1A2|SLC25A18	663|1080|636
GO Biological Process	GO:0045936	Negative regulation of phosphate metabolic process	561	17	0.0313	1.50446	PIK3R2|SIRT2|SLC27A1|PPP1R1B|PEBP1|PPP2R5A|SLC4A1|SLC9A3R1|TERF2IP|CHORDC1|SNCA|AGT|EZR|PTPN1|ARRB1|PARK7|NDRG2	966|969|429|915|654|837|540|366|600|564|453|843|807|693|855|1023|615
GO Biological Process	GO:0001933	Negative regulation of protein phosphorylation	411	14	0.0321	1.49349	PIK3R2|SIRT2|PPP1R1B|PEBP1|SLC9A3R1|TERF2IP|CHORDC1|SNCA|AGT|EZR|PTPN1|ARRB1|PARK7|NDRG2	966|969|915|654|366|600|564|453|843|807|693|855|1023|615
GO Biological Process	GO:0034308	Primary alcohol metabolic process	82	6	0.0351	1.45469	AKR7A2|ALDH2|ADH5|ALDH1A1|NAPEPLD|PARK7	522|999|423|1011|672|1023
GO Biological Process	GO:0016052	Carbohydrate catabolic process	115	7	0.0353	1.45223	ALDOC|ABHD10|AGL|ALDH1A1|PKM|ALDOA|ENO2	759|699|1083|1011|1026|858|549
GO Biological Process	GO:0030004	Cellular monovalent inorganic cation homeostasis	115	7	0.0353	1.45223	SLC4A1|ATP6V1B2|CA2|ATP1B3|AGT|ATP6V1G1|SLC4A4	540|546|945|426|843|732|576
GO Biological Process	GO:0038095	Fc-epsilon receptor signaling pathway	115	7	0.0353	1.45223	PIK3R2|SKP1|PPP3R1|PSMB7|PSME1|GRB2|PPP3CA	966|642|714|351|402|738|870
GO Biological Process	GO:0005975	Carbohydrate metabolic process	467	15	0.0362	1.44129	PCK2|IDH3G|ALDOC|AKR7A2|ALDH2|ABHD10|AGL|ALDH1A1|MPI|PKM|PGP|GYG1|PDHA1|ALDOA|ENO2	585|1047|759|522|999|699|1083|1011|951|1026|780|591|660|858|549
GO Biological Process	GO:0006069	Ethanol oxidation	12	3	0.0371	1.43063	ALDH2|ADH5|ALDH1A1	999|423|1011
GO Biological Process	GO:0006554	Lysine catabolic process	12	3	0.0371	1.43063	CRYM|DLST|ALDH7A1	525|1017|783
GO Biological Process	GO:0030033	Microvillus assembly	12	3	0.0371	1.43063	SLC9A3R1|EZR|RDX	366|807|342
GO Biological Process	GO:0038166	Angiotensin-activated signaling pathway	12	3	0.0371	1.43063	CA2|AGT|AHCYL1	945|843|627
GO Biological Process	GO:1903530	Regulation of secretion by cell	630	18	0.0398	1.40012	SRI|GLUD1|GJA1|LGI3|GLUL|SNCA|ACSL4|GRM7|AGT|EZR|SYT2|RAP1A|SNCG|PPP3CA|PREPL|SEPT4|ARRB1|PPIA	741|963|444|474|876|453|501|393|843|807|1059|498|648|870|381|567|855|420
GO Biological Process	GO:0044087	Regulation of cellular component biogenesis	971	24	0.0406	1.39147	SIRT2|COTL1|CAPZA1|GJA1|ARPC5|JAM3|DDB1|LRRC16A|SNCA|DPYSL3|ARPC5L|TPM1|AGT|EZR|RAP1A|PREX1|GRB2|HSPA2|LCMT1|RDX|CAPZB|PARK7|SPTB|ACTG1	969|579|612|444|765|321|450|1014|453|609|981|852|843|807|498|1062|738|594|972|342|657|1023|447|957
GO Biological Process	GO:0098739	Import across plasma membrane	119	7	0.0406	1.39147	HCN2|SLC27A1|SLC7A5|SLC9A3R1|SLC1A3|SLC1A2|ATP1B3	318|429|459|366|663|1080|426
GO Biological Process	GO:0006536	Glutamate metabolic process	31	4	0.0406	1.39147	GLUD1|GLUL|ALDH5A1|ALDH4A1	963|876|792|720
GO Biological Process	GO:0019318	Hexose metabolic process	157	8	0.0421	1.37572	PCK2|ALDOC|ALDH1A1|MPI|PKM|PDHA1|ALDOA|ENO2	585|759|1011|951|1026|660|858|549
GO Biological Process	GO:0045176	Apical protein localization	13	3	0.0432	1.36452	JAM3|ACTB|RDX	321|975|342
GO Biological Process	GO:1901653	Cellular response to peptide	331	12	0.0433	1.36351	PCK2|PIK3R2|NAMPT|ATP6V1B2|GJA1|CA2|PKM|AGT|AHCYL1|PTPN1|ATP6V1G1|GRB2	585|966|744|546|444|945|1026|843|627|693|732|738
GO Biological Process	GO:0005996	Monosaccharide metabolic process	198	9	0.0433	1.36351	PCK2|ALDOC|ABHD10|ALDH1A1|MPI|PKM|PDHA1|ALDOA|ENO2	585|759|699|1011|951|1026|660|858|549
GO Biological Process	GO:0006601	Creatine biosynthetic process	2	2	0.0433	1.36351	GATM|GAMT	867|339
GO Biological Process	GO:0051621	Regulation of norepinephrine uptake	2	2	0.0433	1.36351	SNCA|ACTB	453|975
GO Biological Process	GO:0032879	Regulation of localization	2740	51	0.0447	1.34969	PIK3R2|PPP3R1|HCN2|SERPINF1|PPP2R5A|SLC9A3R1|SRI|GLUD1|SLC1A2|GJA1|CA2|ATP1B3|CCT8|S100A1|JAM3|LGI3|SCN1A|GLUL|LRRC16A|SNCA|ACSL4|DPYSL3|ACTB|GRM7|TPM1|AGT|EZR|SYT2|RAP1A|AHCYL1|MYO6|SMAP1|SGIP1|PTPN1|PREX1|SNCG|FABP3|PADI2|KCNA1|CCT4|HSPA2|PPP3CA|RDX|TF|PREPL|SEPT4|ARRB1|PARK7|PPIA|DBI|ACTG1	966|714|318|771|837|366|741|963|1080|444|945|426|717|375|321|474|885|876|1014|453|501|609|975|393|852|843|807|1059|498|627|372|840|468|693|1062|648|465|1089|384|348|594|870|342|633|381|567|855|1023|420|534|957
GO Biological Process	GO:0055082	Cellular chemical homeostasis	753	20	0.0462	1.33536	PCK2|PIK3R2|SKP1|SERPINF1|SLC4A1|SLC9A3R1|SRI|ATP6V1B2|GJA1|CA2|ATP1B3|CALB2|SNCA|AGT|NUCKS1|ATP6V1G1|PPP3CA|TF|SLC4A4|TPT1	585|966|642|771|540|366|741|546|444|945|426|456|453|843|1074|732|870|633|576|555
GO Biological Process	GO:0006897	Endocytosis	433	14	0.047	1.3279	SNCB|DPYSL2|ELMO1|LRRC16A|SNCA|ACTB|EZR|SYT2|MYO6|SGIP1|GRB2|ARRB1|FNBP1|ACTG1	987|801|582|1014|453|975|807|1059|372|468|738|855|1107|957
GO Biological Process	GO:0051693	Actin filament capping	33	4	0.0471	1.32698	CAPZA1|RDX|CAPZB|SPTB	612|342|657|447
GO Biological Process	GO:1901135	Carbohydrate derivative metabolic process	987	24	0.0474	1.32422	AHCY|ACOT8|ALDOC|AKR7A2|ABHD10|ALDH1A1|HPRT1|MPI|PKM|DLST|ACSL4|PNP|HSD17B8|ACOT7|ACOT9|PDHA1|AK3|ALDOA|PAICS|HDHD1|PARK7|ENO2|DBI|NUDT3	777|921|759|522|699|1011|804|951|1026|1017|501|849|333|723|687|660|846|858|684|1050|1023|549|534|330
GO Biological Process	GO:0010035	Response to inorganic substance	538	16	0.0482	1.31695	SERPINF1|QDPR|CA2|SNCB|SNCA|SYT2|AHCYL1|CUTA|KCNA1|FECH|PPP3CA|CST3|TXNRD2|TF|GPHN|PARK7	771|396|945|987|453|1059|627|888|384|825|870|438|912|633|909|1023
GO Biological Process	GO:0090407	Organophosphate biosynthetic process	539	16	0.049	1.3098	PIK3R2|NAMPT|SLC27A1|HPRT1|PKM|ACSL4|AGK|PNP|HSD17B8|ACOT7|PDHA1|AK3|NADK2|ALDOA|PAICS|GPHN	966|744|429|804|1026|501|762|849|333|723|660|846|900|858|684|909
GO Biological Process	GO:0008104	Protein localization	2139	42	0.0492	1.30803	TIMM13|ACOT8|SCG3|CDC37|PIK3R2|SKP1|MTX2|SLC4A1|SLC9A3R1|SRI|ATP6V1B2|GJA1|ATP1B3|JAM3|TPP1|TERF2IP|CRAT|NPLOC4|HNRNPA2B1|AGK|ACTB|AGT|EZR|RAP1A|AHCYL1|MYO6|LGI1|SNCG|ATP6V1G1|CUTA|KCNA1|PPP3CA|RDX|TF|PREPL|SELENBP1|SEPT4|ARRB1|GPHN|PARK7|EPHX2|ACTG1	588|921|624|1005|966|642|516|540|366|741|546|444|426|321|510|600|411|504|984|762|975|843|807|498|627|372|882|648|732|888|384|870|342|633|381|651|567|855|909|1023|492|957
GO Biological Process	GO:0072350	Tricarboxylic acid metabolic process	14	3	0.0492	1.30803	ACO2|IDH3G|GLUD1	978|1047|963
GO Biological Process	GO:0016051	Carbohydrate biosynthetic process	125	7	0.0493	1.30715	PCK2|ALDOC|AGL|PGP|GYG1|ALDOA|ENO2	585|759|1083|780|591|858|549
GO Cellular Component	GO:0070062	Extracellular exosome	2099	104	2.05e-35	34.6882	ST13|AHCY|CRYM|CDC37|NAMPT|ALDOC|HSPE1|PPP1R7|SPR|AKR7A2|EIF2S3|SERPINF1|PMP2|PEBP1|SLC7A5|ALDH2|SLC4A1|COTL1|SLC9A3R1|CAPZA1|SRI|ATP6V1B2|HNMT|QDPR|CA2|ATP1B3|CCT8|ARPC5|SERPINI1|ADH5|APEH|ALDH1A1|CFL2|HPRT1|TPP1|DDB1|GLUL|DPYSL2|PABPC1|GRHPR|SSR4|MPI|BASP1|PKM|LRRC16A|ACSL4|PRDX6|TPM4|ARPC5L|HNRNPA2B1|ALDH9A1|ACTB|GMPPA|PNP|AGT|ACAT2|EZR|CSRP1|PCMT1|TPM3|RAP1A|AHCYL1|MYO6|RBMX|PTGDS|SNCG|GHITM|…	816|777|525|1005|744|759|570|483|831|522|561|771|768|654|459|999|540|579|366|612|741|546|894|396|945|426|717|765|645|423|1020|1011|414|804|510|450|876|801|639|993|1095|951|324|1026|1014|501|471|1029|981|984|666|975|990|849|843|960|807|873|1071|495|498|627|372|462|702|648|861|903|465|732|888|1089|723|1104|402|738|348|594|858|867|306|438|1086|684|342|477|633|783|576|390|651|828|657|672|1023|420|492…
GO Cellular Component	GO:0005737	Cytoplasm	11428	216	1.64e-28	27.7852	HSD17B10|NDUFB7|TIMM13|ST13|ACO2|ZFYVE21|PCK2|AHCY|ACOT8|IDH3G|CRYM|SCG3|DECR1|CDC37|PIK3R2|NAMPT|ALDOC|SKP1|HSPE1|PPP1R7|PPP3R1|SPR|AKR7A2|GDA|COX6B1|SIRT2|MTX2|SLC27A1|EIF2S3|PPP1R1B|PTCD3|SERPINF1|PMP2|MRPS36|LRRC8A|PSMB7|PEBP1|PPP2R5A|SLC7A5|ALDH2|SLC4A1|COTL1|SLC9A3R1|CAPZA1|CNRIP1|SLC1A3|TNC|HIBADH|SRI|L2HGDH|ABHD10|ATP6V1B2|GLUD1|MRPL49|HNMT|QDPR|TMEM163|GJA1|CA2|ATP1B3|VBP1|CCT8|ELMO2|CTB…	417|558|588|816|978|387|585|777|921|1047|525|624|1101|1005|966|744|759|642|570|483|714|831|522|822|798|969|516|429|561|915|918|771|768|834|486|351|654|837|459|999|540|579|366|612|891|663|528|813|741|573|699|546|963|1056|894|396|408|444|945|426|747|717|729|705|531|375|1083|765|645|423|1020|954|1011|414|804|321|510|600|450|474|885|315|456|1068|876|987|801|582|639|993|792|411|1095|951|363|324|1026|9…
GO Cellular Component	GO:0031982	Vesicle	3879	125	4.77e-27	26.3215	ST13|ZFYVE21|AHCY|CRYM|SCG3|CDC37|NAMPT|ALDOC|HSPE1|PPP1R7|SPR|AKR7A2|EIF2S3|SERPINF1|PMP2|PSMB7|PEBP1|SLC7A5|ALDH2|SLC4A1|COTL1|SLC9A3R1|CAPZA1|SLC1A3|SRI|ATP6V1B2|HNMT|QDPR|TMEM163|GJA1|CA2|ATP1B3|CCT8|AGL|ARPC5|SERPINI1|ADH5|APEH|ALDH1A1|CFL2|HPRT1|TPP1|DDB1|LGI3|GLUL|DPYSL2|PABPC1|GRHPR|SSR4|MPI|BASP1|PKM|LRRC16A|ACSL4|GYG1|PRDX6|DPYSL3|TPM4|ARPC5L|HNRNPA2B1|ALDH9A1|ACTB|GMPPA|PNP|ILF2|AGT|AC…	816|387|777|525|624|1005|744|759|570|483|831|522|561|771|768|351|654|459|999|540|579|366|612|663|741|546|894|396|408|444|945|426|717|1083|765|645|423|1020|1011|414|804|510|450|474|876|801|639|993|1095|951|324|1026|1014|501|591|471|609|1029|981|984|666|975|990|849|309|843|960|807|1059|873|1071|495|498|627|372|462|468|693|702|648|861|903|465|732|888|1089|723|1104|384|402|738|348|594|858|867|306|438…
GO Cellular Component	GO:0005615	Extracellular space	3195	111	1.34e-25	24.8729	ST13|AHCY|CRYM|CDC37|NAMPT|ALDOC|HSPE1|PPP1R7|SPR|AKR7A2|EIF2S3|SERPINF1|PMP2|PEBP1|SLC7A5|ALDH2|SLC4A1|COTL1|SLC9A3R1|CAPZA1|TNC|SRI|ATP6V1B2|HNMT|QDPR|CA2|ATP1B3|CCT8|S100B|ARPC5|SERPINI1|ADH5|APEH|ALDH1A1|CFL2|HPRT1|JAM3|TPP1|DDB1|GLUL|DPYSL2|LGI4|PABPC1|GRHPR|SSR4|MPI|BASP1|PKM|LRRC16A|SNCA|ACSL4|PRDX6|DPYSL3|TPM4|ARPC5L|HNRNPA2B1|ALDH9A1|ACTB|GMPPA|PNP|AGT|ACAT2|EZR|CSRP1|PCMT1|TPM3|RAP1A|AH…	816|777|525|1005|744|759|570|483|831|522|561|771|768|654|459|999|540|579|366|612|528|741|546|894|396|945|426|717|531|765|645|423|1020|1011|414|804|321|510|450|876|801|630|639|993|1095|951|324|1026|1014|453|501|471|609|1029|981|984|666|975|990|849|843|960|807|873|1071|495|498|627|372|462|882|702|648|861|903|465|732|888|1089|723|1104|402|738|348|594|858|867|306|438|1086|684|342|477|633|783|576|390|…
GO Cellular Component	GO:0005576	Extracellular region	4166	119	1.19e-20	19.9245	ST13|AHCY|CRYM|SCG3|CDC37|NAMPT|ALDOC|HSPE1|PPP1R7|SPR|AKR7A2|EIF2S3|SERPINF1|PMP2|PSMB7|PEBP1|SLC7A5|ALDH2|SLC4A1|COTL1|SLC9A3R1|CAPZA1|TNC|SRI|ATP6V1B2|HNMT|QDPR|CA2|ATP1B3|CCT8|S100B|S100A1|AGL|ARPC5|SERPINI1|ADH5|APEH|ALDH1A1|CFL2|HPRT1|JAM3|TPP1|DDB1|LGI3|GLUL|DPYSL2|LGI4|PABPC1|GRHPR|SSR4|MPI|BASP1|PKM|LRRC16A|SNCA|ACSL4|GYG1|PRDX6|DPYSL3|TPM4|ARPC5L|HNRNPA2B1|ALDH9A1|ACTB|GMPPA|PNP|ILF2|AG…	816|777|525|624|1005|744|759|570|483|831|522|561|771|768|351|654|459|999|540|579|366|612|528|741|546|894|396|945|426|717|531|375|1083|765|645|423|1020|1011|414|804|321|510|450|474|876|801|630|639|993|1095|951|324|1026|1014|453|501|591|471|609|1029|981|984|666|975|990|849|309|843|960|807|873|1071|495|498|627|372|462|882|702|648|861|903|465|732|888|1089|723|1104|402|738|348|594|858|867|306|438|1086…
GO Cellular Component	GO:0005622	Intracellular	14276	223	1.32e-16	15.8794	HSD17B10|NDUFB7|TIMM13|ST13|ACO2|ZFYVE21|PCK2|AHCY|ACOT8|IDH3G|CRYM|SCG3|DECR1|CDC37|PIK3R2|NAMPT|ALDOC|SKP1|HSPE1|PPP1R7|PPP3R1|SPR|AKR7A2|GDA|COX6B1|GNG13|SIRT2|MTX2|SLC27A1|EIF2S3|PPP1R1B|PTCD3|SERPINF1|PMP2|MRPS36|LRRC8A|PSMB7|PEBP1|PPP2R5A|SLC7A5|ALDH2|SLC4A1|COTL1|SLC9A3R1|CAPZA1|CNRIP1|SLC1A3|TNC|HIBADH|SRI|L2HGDH|ABHD10|NONO|ATP6V1B2|GLUD1|MRPL49|HNMT|QDPR|TMEM163|GJA1|CA2|ATP1B3|VBP1|CCT…	417|558|588|816|978|387|585|777|921|1047|525|624|1101|1005|966|744|759|642|570|483|714|831|522|822|798|690|969|516|429|561|915|918|771|768|834|486|351|654|837|459|999|540|579|366|612|891|663|528|813|741|573|699|1077|546|963|1056|894|396|408|444|945|426|747|717|729|705|531|375|1083|765|552|645|423|1020|954|1011|414|804|321|510|600|450|474|885|315|456|1068|876|987|801|582|639|993|792|411|1095|951|3…
GO Cellular Component	GO:0005739	Mitochondrion	1611	65	5.17e-16	15.2865	HSD17B10|NDUFB7|TIMM13|ACO2|PCK2|IDH3G|CRYM|DECR1|HSPE1|PPP3R1|COX6B1|SIRT2|MTX2|SLC27A1|PTCD3|MRPS36|ALDH2|HIBADH|SRI|L2HGDH|ABHD10|GLUD1|MRPL49|GJA1|ADH5|NDUFS4|TMEM126A|CYCS|GLUL|ALDH5A1|CRAT|PKM|NDUFV1|NDUFV2|SLC25A18|MRPL12|DLST|SNCA|ACSL4|PRDX6|AGK|MT-ND1|ACAT2|ECHS1|PTPN1|GHITM|HSD17B8|ALDH4A1|ACOT7|ACOT9|PDHA1|AK3|NADK2|FECH|PPP3CA|BCKDK|GATM|TXNRD2|ALDH7A1|SEPT4|OXR1|PARK7|MRPS27|UQCRB|P…	417|558|588|978|585|1047|525|1101|570|714|798|969|516|429|918|834|999|813|741|573|699|963|1056|444|423|954|315|1068|876|792|411|1026|327|933|636|879|1017|453|501|471|762|678|960|405|693|861|333|720|723|687|660|846|900|825|870|750|867|912|783|567|819|1023|726|378|1008
GO Cellular Component	GO:0005829	Cytosol	5193	124	2.64e-15	14.5784	ST13|ACO2|PCK2|AHCY|ACOT8|CRYM|DECR1|CDC37|PIK3R2|NAMPT|ALDOC|SKP1|PPP3R1|SPR|AKR7A2|GDA|SIRT2|EIF2S3|PPP1R1B|PTCD3|PSMB7|PEBP1|PPP2R5A|SLC7A5|COTL1|CAPZA1|SRI|ABHD10|ATP6V1B2|HNMT|QDPR|CA2|VBP1|CCT8|ELMO2|S100B|AGL|ARPC5|ADH5|APEH|ALDH1A1|HPRT1|TERF2IP|CALB2|CYCS|GLUL|SNCB|DPYSL2|ELMO1|PABPC1|GRHPR|CRAT|MPI|PRMT5|PKM|NDUFV1|NPLOC4|LRRC16A|SNCA|GYG1|PRDX6|DPYSL3|TPM4|ALDH9A1|AGK|ACTB|TPM1|STIP1|P…	816|978|585|777|921|525|1101|1005|966|744|759|642|714|831|522|822|969|561|915|918|351|654|837|459|579|612|741|699|546|894|396|945|747|717|729|531|1083|765|423|1020|1011|804|600|456|1068|876|987|801|582|639|993|411|951|363|1026|327|504|1014|453|591|471|609|1029|666|762|975|852|537|849|843|960|807|1071|495|498|627|372|468|693|312|1062|354|465|732|432|1089|723|1104|942|897|384|402|738|348|594|870|85…
GO Cellular Component	GO:0043227	Membrane-bounded organelle	12427	206	5.18e-15	14.2857	HSD17B10|NDUFB7|TIMM13|ST13|ACO2|ZFYVE21|PCK2|AHCY|ACOT8|IDH3G|CRYM|SCG3|DECR1|CDC37|PIK3R2|NAMPT|ALDOC|SKP1|HSPE1|PPP1R7|PPP3R1|SPR|AKR7A2|COX6B1|SIRT2|MTX2|SLC27A1|EIF2S3|PPP1R1B|PTCD3|SERPINF1|PMP2|MRPS36|PSMB7|PEBP1|PPP2R5A|SLC7A5|ALDH2|SLC4A1|COTL1|SLC9A3R1|CAPZA1|SLC1A3|TNC|HIBADH|SRI|L2HGDH|ABHD10|NONO|ATP6V1B2|GLUD1|MRPL49|HNMT|QDPR|TMEM163|GJA1|CA2|ATP1B3|VBP1|CCT8|CTBP1|S100B|S100A1|AGL…	417|558|588|816|978|387|585|777|921|1047|525|624|1101|1005|966|744|759|642|570|483|714|831|522|798|969|516|429|561|915|918|771|768|834|351|654|837|459|999|540|579|366|612|663|528|813|741|573|699|1077|546|963|1056|894|396|408|444|945|426|747|717|705|531|375|1083|765|552|645|423|1020|954|1011|414|804|321|510|600|450|474|885|315|456|1068|876|801|639|993|792|411|1095|951|363|324|1026|936|327|933|636|…
GO Cellular Component	GO:0043226	Organelle	13515	212	5.58e-13	12.2534	HSD17B10|NDUFB7|TIMM13|ST13|ACO2|ZFYVE21|PCK2|AHCY|ACOT8|IDH3G|CRYM|SCG3|DECR1|CDC37|PIK3R2|NAMPT|ALDOC|SKP1|HSPE1|PPP1R7|PPP3R1|SPR|AKR7A2|COX6B1|SIRT2|MTX2|SLC27A1|EIF2S3|PPP1R1B|PTCD3|SERPINF1|PMP2|MRPS36|PSMB7|PEBP1|PPP2R5A|SLC7A5|ALDH2|SLC4A1|COTL1|SLC9A3R1|CAPZA1|SLC1A3|TNC|HIBADH|SRI|L2HGDH|ABHD10|NONO|ATP6V1B2|GLUD1|MRPL49|HNMT|QDPR|TMEM163|GJA1|CA2|ATP1B3|VBP1|CCT8|CTBP1|S100B|S100A1|AGL…	417|558|588|816|978|387|585|777|921|1047|525|624|1101|1005|966|744|759|642|570|483|714|831|522|798|969|516|429|561|915|918|771|768|834|351|654|837|459|999|540|579|366|612|663|528|813|741|573|699|1077|546|963|1056|894|396|408|444|945|426|747|717|705|531|375|1083|765|552|645|423|1020|954|1011|414|804|321|510|600|450|474|885|315|456|1068|876|801|639|993|792|411|1095|951|363|324|1026|936|327|606|933|…
GO Cellular Component	GO:0005759	Mitochondrial matrix	479	29	3.15e-10	9.50169	HSD17B10|ACO2|PCK2|IDH3G|DECR1|HSPE1|MRPS36|ALDH2|HIBADH|ABHD10|GLUD1|MRPL49|ALDH5A1|MRPL12|DLST|ECHS1|PTPN1|HSD17B8|ALDH4A1|ACOT9|PDHA1|AK3|NADK2|FECH|BCKDK|TXNRD2|ALDH7A1|PARK7|MRPS27	417|978|585|1047|1101|570|834|999|813|699|963|1056|792|879|1017|405|693|333|720|687|660|846|900|825|750|912|783|1023|726
GO Cellular Component	GO:1904813	ficolin-1-rich granule lumen	125	14	1.35e-07	6.86967	ALDOC|PSMB7|COTL1|CCT8|AGL|ARPC5|APEH|PKM|GYG1|PNP|ILF2|ALDOA|CST3|PPIA	759|351|579|717|1083|765|1020|1026|591|849|309|858|438|420
GO Cellular Component	GO:0070013	Intracellular organelle lumen	5857	113	3.94e-07	6.4045	HSD17B10|NDUFB7|TIMM13|ACO2|PCK2|ACOT8|IDH3G|CRYM|SCG3|DECR1|NAMPT|ALDOC|SKP1|HSPE1|PPP3R1|SPR|SIRT2|MTX2|PTCD3|MRPS36|PSMB7|ALDH2|COTL1|TNC|HIBADH|SRI|ABHD10|NONO|GLUD1|MRPL49|HNMT|GJA1|CCT8|CTBP1|S100B|AGL|ARPC5|HDAC11|SERPINI1|APEH|CFL2|TPP1|TERF2IP|DDB1|SCN1A|CYCS|GRHPR|ALDH5A1|CRAT|PRMT5|BASP1|PKM|NPLOC4|LRRC16A|MRPL12|DLST|GYG1|PRDX6|HNRNPA2B1|AGK|ACTB|PNP|ILF2|ACAT2|EZR|NUCKS1|ECHS1|MYO6|R…	417|558|588|978|585|921|1047|525|624|1101|744|759|642|570|714|831|969|516|918|834|351|999|579|528|813|741|699|1077|963|1056|894|444|717|705|531|1083|765|552|645|1020|414|510|600|450|885|1068|993|792|411|363|324|1026|504|1014|879|1017|591|471|984|762|975|849|309|960|807|1074|405|372|462|693|648|354|333|720|1089|723|687|660|1104|846|900|402|825|738|348|594|870|750|858|867|927|696|438|972|912|477|63…
GO Cellular Component	GO:0032991	Protein-containing complex	5073	102	4.25e-07	6.37161	HSD17B10|NDUFB7|TIMM13|ST13|DECR1|CDC37|PIK3R2|SKP1|PPP3R1|COX6B1|GNG13|SIRT2|MTX2|HCN2|EIF2S3|MRPS36|LRRC8A|PSMB7|PPP2R5A|SLC7A5|SLC9A3R1|CAPZA1|SLC1A3|NONO|ATP6V1B2|SLC1A2|MRPL49|GJA1|ATP1B3|VBP1|CCT8|CTBP1|S100A1|AGL|ARPC5|HDAC11|NDUFS4|JAM3|TERF2IP|DDB1|SCN1A|CYCS|GLUL|ELMO1|PABPC1|GRHPR|SSR4|PRMT5|PKM|NDUFV1|NDUFV2|NPLOC4|LRRC16A|MRPL12|DLST|SNCA|DPYSL3|TPM4|ARPC5L|HNRNPA2B1|AGK|ACTB|GRM7|TP…	417|558|588|816|1101|1005|966|642|714|798|690|969|516|318|561|834|486|351|837|459|366|612|663|1077|546|1080|1056|444|426|747|717|705|375|1083|765|552|954|321|600|450|885|1068|876|582|639|993|1095|363|1026|327|933|504|1014|879|1017|453|609|1029|981|984|762|975|393|852|537|678|309|807|495|498|372|462|468|693|354|732|432|660|897|384|402|738|348|594|870|750|696|477|633|603|657|567|399|420|726|378|549…
GO Cellular Component	GO:0043229	Intracellular organelle	12528	190	7.09e-07	6.14935	HSD17B10|NDUFB7|TIMM13|ACO2|ZFYVE21|PCK2|AHCY|ACOT8|IDH3G|CRYM|SCG3|DECR1|PIK3R2|NAMPT|ALDOC|SKP1|HSPE1|PPP1R7|PPP3R1|SPR|AKR7A2|COX6B1|SIRT2|MTX2|SLC27A1|PPP1R1B|PTCD3|SERPINF1|MRPS36|PSMB7|PEBP1|PPP2R5A|SLC7A5|ALDH2|SLC4A1|COTL1|SLC9A3R1|CAPZA1|SLC1A3|TNC|HIBADH|SRI|L2HGDH|ABHD10|NONO|ATP6V1B2|GLUD1|MRPL49|HNMT|TMEM163|GJA1|ATP1B3|VBP1|CCT8|CTBP1|S100B|S100A1|AGL|ARPC5|HDAC11|SERPINI1|ADH5|APEH…	417|558|588|978|387|585|777|921|1047|525|624|1101|966|744|759|642|570|483|714|831|522|798|969|516|429|915|918|771|834|351|654|837|459|999|540|579|366|612|663|528|813|741|573|699|1077|546|963|1056|894|408|444|426|747|717|705|531|375|1083|765|552|645|423|1020|954|414|321|510|600|450|474|885|315|456|1068|876|801|639|993|792|411|1095|363|324|1026|936|327|933|636|504|1014|879|1017|996|453|501|591|471|…
GO Cellular Component	GO:0043292	Contractile fiber	238	17	8.53e-07	6.06905	PPP2R5A|SLC4A1|SRI|S100A1|CFL2|SCN1A|SYNM|TPM4|TPM1|CSRP1|TPM3|PPP3CA|ALDOA|DEK|CST3|CAPZB|ACTG1	837|540|741|375|414|885|996|1029|852|873|495|870|858|927|438|657|957
GO Cellular Component	GO:0005740	Mitochondrial envelope	766	30	1.61e-06	5.79317	NDUFB7|TIMM13|COX6B1|MTX2|PTCD3|MRPS36|L2HGDH|MRPL49|GJA1|NDUFS4|TMEM126A|CYCS|CRAT|NDUFV1|NDUFV2|SLC25A18|MRPL12|ACSL4|AGK|MT-ND1|PTPN1|GHITM|HSD17B8|FECH|GATM|SEPT4|PARK7|MRPS27|UQCRB|PGAM5	558|588|798|516|918|834|573|1056|444|954|315|1068|411|327|933|636|879|501|762|678|693|861|333|825|867|567|1023|726|378|1008
GO Cellular Component	GO:0043005	Neuron projection	1366	42	1.69e-06	5.77211	AHCY|GNG13|SIRT2|PPP1R1B|SERPINF1|SLC9A3R1|SLC1A3|SRI|SLC1A2|HNMT|QDPR|CA2|S100A1|ARPC5|LGI3|SCN1A|CALB2|GLUL|BASP1|SNCA|DPYSL3|ACTB|GRM7|MT-ND1|SYT2|NAV1|RAP1A|PREX1|SNCG|KCNA1|MAG|PPP3CA|ERMN|CST3|RDX|NAPEPLD|ARRB1|GABRG2|GPHN|PARK7|NDRG2|ACTG1	777|690|969|915|771|366|663|741|1080|894|396|945|375|765|474|885|456|876|324|453|609|975|393|678|1059|906|498|1062|648|384|1053|870|306|438|342|672|855|399|909|1023|615|957
GO Cellular Component	GO:0015629	Actin cytoskeleton	477	23	2.17e-06	5.66354	COTL1|SLC9A3R1|CAPZA1|ARPC5|CFL2|JAM3|CALB2|LRRC16A|SNCA|DPYSL3|TPM4|ARPC5L|ACTB|TPM1|EZR|TPM3|MYO6|ALDOA|RDX|CAPZB|SPTB|ACTG1|MARCKS	579|366|612|765|414|321|456|1014|453|609|1029|981|975|852|807|495|372|858|342|657|447|957|513
GO Cellular Component	GO:0005743	Mitochondrial inner membrane	480	23	2.32e-06	5.63451	NDUFB7|TIMM13|COX6B1|PTCD3|MRPS36|L2HGDH|MRPL49|NDUFS4|TMEM126A|CYCS|CRAT|NDUFV1|NDUFV2|SLC25A18|MRPL12|AGK|MT-ND1|PTPN1|GHITM|FECH|GATM|MRPS27|UQCRB	558|588|798|918|834|573|1056|954|315|1068|411|327|933|636|879|762|678|693|861|825|867|726|378
GO Cellular Component	GO:0031966	Mitochondrial membrane	722	28	5.13e-06	5.28988	NDUFB7|TIMM13|COX6B1|MTX2|PTCD3|MRPS36|L2HGDH|MRPL49|GJA1|NDUFS4|TMEM126A|CYCS|CRAT|NDUFV1|NDUFV2|SLC25A18|MRPL12|ACSL4|AGK|MT-ND1|PTPN1|GHITM|FECH|GATM|SEPT4|MRPS27|UQCRB|PGAM5	558|588|798|516|918|834|573|1056|444|954|315|1068|411|327|933|636|879|501|762|678|693|861|825|867|567|726|378|1008
GO Cellular Component	GO:0120025	Plasma membrane bounded cell projection	2193	55	6.34e-06	5.19791	AHCY|GNG13|SIRT2|PPP1R1B|SERPINF1|SLC9A3R1|SLC1A3|SRI|ATP6V1B2|SLC1A2|HNMT|QDPR|CA2|ATP1B3|CCT8|S100B|S100A1|ARPC5|JAM3|LGI3|SCN1A|CALB2|GLUL|PABPC1|BASP1|PKM|PSD3|LRRC16A|SNCA|DPYSL3|ACTB|GRM7|TPM1|MT-ND1|EZR|SYT2|NAV1|RAP1A|MYO6|PREX1|SNCG|KCNA1|MAG|PPP3CA|ERMN|CST3|RDX|SEPT4|NAPEPLD|ARRB1|GABRG2|GPHN|PARK7|NDRG2|ACTG1	777|690|969|915|771|366|663|741|546|1080|894|396|945|426|717|531|375|765|321|474|885|456|876|639|324|1026|606|1014|453|609|975|393|852|678|807|1059|906|498|372|1062|648|384|1053|870|306|438|342|567|672|855|399|909|1023|615|957
GO Cellular Component	GO:0030424	Axon	646	26	7.2e-06	5.14267	SIRT2|SERPINF1|SRI|SLC1A2|CA2|ARPC5|SCN1A|CALB2|GLUL|BASP1|SNCA|DPYSL3|ACTB|GRM7|SYT2|NAV1|PREX1|SNCG|KCNA1|MAG|ERMN|CST3|GABRG2|PARK7|NDRG2|ACTG1	969|771|741|1080|945|765|885|456|876|324|453|609|975|393|1059|906|1062|648|384|1053|306|438|399|1023|615|957
GO Cellular Component	GO:0034774	Secretory granule lumen	324	18	8.46e-06	5.07263	SCG3|ALDOC|PSMB7|COTL1|CCT8|AGL|ARPC5|SERPINI1|PKM|GYG1|PRDX6|PNP|ILF2|PADI2|ALDOA|TF|GCA|PPIA	624|759|351|579|717|1083|765|645|1026|591|471|849|309|1089|858|633|390|420
GO Cellular Component	GO:0042995	Cell projection	2287	56	9.25e-06	5.03386	AHCY|GNG13|SIRT2|PPP1R1B|SERPINF1|SLC9A3R1|SLC1A3|SRI|ATP6V1B2|SLC1A2|HNMT|QDPR|CA2|ATP1B3|CCT8|S100B|S100A1|ARPC5|JAM3|LGI3|SCN1A|CALB2|GLUL|PABPC1|BASP1|PKM|PSD3|LRRC16A|SNCA|DPYSL3|ACTB|GRM7|TPM1|MT-ND1|EZR|SYT2|NAV1|RAP1A|MYO6|PREX1|SNCG|KCNA1|MAG|CCT4|PPP3CA|ERMN|CST3|RDX|SEPT4|NAPEPLD|ARRB1|GABRG2|GPHN|PARK7|NDRG2|ACTG1	777|690|969|915|771|366|663|741|546|1080|894|396|945|426|717|531|375|765|321|474|885|456|876|639|324|1026|606|1014|453|609|975|393|852|678|807|1059|906|498|372|1062|648|384|1053|348|870|306|438|342|567|672|855|399|909|1023|615|957
GO Cellular Component	GO:0030016	Myofibril	227	15	1.05e-05	4.97881	PPP2R5A|SLC4A1|SRI|S100A1|CFL2|SCN1A|SYNM|TPM4|TPM1|CSRP1|TPM3|PPP3CA|ALDOA|CAPZB|ACTG1	837|540|741|375|414|885|996|1029|852|873|495|870|858|657|957
GO Cellular Component	GO:0031967	Organelle envelope	1213	37	1.09e-05	4.96257	NDUFB7|TIMM13|COX6B1|MTX2|PTCD3|MRPS36|L2HGDH|MRPL49|GJA1|APEH|NDUFS4|TERF2IP|TMEM126A|CYCS|CRAT|NDUFV1|NDUFV2|SLC25A18|MRPL12|ACSL4|AGK|MT-ND1|MYO6|PTPN1|PTGDS|GHITM|HSD17B8|FECH|GATM|CST3|SEPT4|NAPEPLD|PARK7|TMEM33|MRPS27|UQCRB|PGAM5	558|588|798|516|918|834|573|1056|444|1020|954|600|315|1068|411|327|933|636|879|501|762|678|372|693|702|861|333|825|867|438|567|672|1023|786|726|378|1008
GO Cellular Component	GO:0098798	Mitochondrial protein complex	262	16	1.09e-05	4.96257	HSD17B10|NDUFB7|TIMM13|MTX2|MRPS36|MRPL49|NDUFS4|NDUFV1|NDUFV2|MRPL12|AGK|MT-ND1|PDHA1|BCKDK|MRPS27|UQCRB	417|558|588|516|834|1056|954|327|933|879|762|678|660|750|726|378
GO Cellular Component	GO:0110165	Cellular anatomical entity	17788	231	2.48e-05	4.60555	HSD17B10|NDUFB7|TIMM13|ST13|ACO2|ZFYVE21|PCK2|AHCY|ACOT8|IDH3G|CRYM|SCG3|DECR1|CDC37|PIK3R2|NAMPT|ALDOC|SKP1|HSPE1|PPP1R7|PPP3R1|SPR|AKR7A2|GDA|COX6B1|GNG13|SIRT2|MTX2|HCN2|SLC27A1|EIF2S3|PPP1R1B|PTCD3|SERPINF1|PMP2|MRPS36|LRRC8A|PSMB7|PEBP1|PPP2R5A|SLC7A5|ALDH2|SLC4A1|COTL1|SLC9A3R1|CAPZA1|CNRIP1|SLC1A3|TNC|HIBADH|SRI|L2HGDH|ABHD10|NONO|ATP6V1B2|GLUD1|SLC1A2|MRPL49|HNMT|QDPR|TMEM163|GJA1|CA2|ATP…	417|558|588|816|978|387|585|777|921|1047|525|624|1101|1005|966|744|759|642|570|483|714|831|522|822|798|690|969|516|318|429|561|915|918|771|768|834|486|351|654|837|459|999|540|579|366|612|891|663|528|813|741|573|699|1077|546|963|1080|1056|894|396|408|444|945|426|747|717|729|705|531|375|1083|765|552|645|423|1020|954|1011|414|804|321|510|600|450|474|885|315|456|1068|876|987|801|582|630|639|993|792|4…
GO Cellular Component	GO:0005884	Actin filament	101	10	3.47e-05	4.45967	JAM3|LRRC16A|DPYSL3|TPM4|ACTB|TPM1|EZR|TPM3|MYO6|ACTG1	321|1014|609|1029|975|852|807|495|372|957
GO Cellular Component	GO:0005938	Cell cortex	292	16	3.67e-05	4.43533	SLC4A1|COTL1|CTBP1|CFL2|CALB2|SNCA|ACTB|GRM7|EZR|MYO6|ERMN|RDX|SEPT4|FNBP1|SPTB|MARCKS	540|579|705|414|456|453|975|393|807|372|306|342|567|1107|447|513
GO Cellular Component	GO:1990204	Oxidoreductase complex	107	10	5.37e-05	4.27003	NDUFB7|MRPS36|NDUFS4|NDUFV1|NDUFV2|DLST|MT-ND1|PDHA1|BCKDK|UQCRB	558|834|954|327|933|1017|678|660|750|378
GO Cellular Component	GO:0030017	Sarcomere	207	13	9.3e-05	4.03152	PPP2R5A|SLC4A1|SRI|S100A1|CFL2|SCN1A|TPM4|TPM1|CSRP1|TPM3|PPP3CA|ALDOA|CAPZB	837|540|741|375|414|885|1029|852|873|495|870|858|657
GO Cellular Component	GO:0043209	Myelin sheath	46	7	0.00011	3.95861	SIRT2|PMP2|CA2|JAM3|GLUL|MAG|ERMN	969|768|945|321|876|1053|306
GO Cellular Component	GO:0099512	Supramolecular fiber	939	29	0.00016	3.79588	SIRT2|PPP2R5A|SLC4A1|SRI|CCT8|S100A1|CFL2|JAM3|SCN1A|LRRC16A|SYNM|SNCA|DPYSL3|TPM4|ACTB|TPM1|EZR|NAV1|CSRP1|TPM3|MYO6|CCT4|PPP3CA|ALDOA|DEK|CST3|CAPZB|ACTG1|TPT1	969|837|540|741|717|375|414|321|885|1014|996|453|609|1029|975|852|807|906|873|495|372|348|870|858|927|438|657|957|555
GO Cellular Component	GO:0043231	Intracellular membrane-bounded organelle	10761	162	0.00025	3.60206	HSD17B10|NDUFB7|TIMM13|ACO2|PCK2|AHCY|ACOT8|IDH3G|CRYM|SCG3|DECR1|PIK3R2|NAMPT|SKP1|HSPE1|PPP1R7|PPP3R1|SPR|AKR7A2|COX6B1|SIRT2|MTX2|SLC27A1|PPP1R1B|PTCD3|MRPS36|PSMB7|PEBP1|PPP2R5A|SLC7A5|ALDH2|COTL1|TNC|HIBADH|SRI|L2HGDH|ABHD10|NONO|ATP6V1B2|GLUD1|MRPL49|HNMT|GJA1|VBP1|CCT8|CTBP1|S100B|S100A1|AGL|ARPC5|HDAC11|ADH5|APEH|NDUFS4|CFL2|JAM3|TPP1|TERF2IP|DDB1|SCN1A|TMEM126A|CALB2|CYCS|GLUL|PABPC1|GRH…	417|558|588|978|585|777|921|1047|525|624|1101|966|744|642|570|483|714|831|522|798|969|516|429|915|918|834|351|654|837|459|999|579|528|813|741|573|699|1077|546|963|1056|894|444|747|717|705|531|375|1083|765|552|423|1020|954|414|321|510|600|450|885|315|456|1068|876|639|993|792|411|1095|363|324|1026|936|327|933|636|504|1014|879|1017|453|501|591|471|984|762|975|537|849|678|309|960|807|1074|873|405|372…
GO Cellular Component	GO:0030054	Cell junction	2075	48	0.00027	3.56864	ZFYVE21|NAMPT|SIRT2|PPP1R1B|SLC1A3|TNC|SRI|SLC1A2|TMEM163|GJA1|CTBP1|ARPC5|JAM3|LGI3|SCN1A|CALB2|GLUL|SNCB|PABPC1|BASP1|FAIM2|PSD3|SYNM|SNCA|DPYSL3|TPM4|ARPC5L|ACTB|GRM7|EZR|SYT2|CSRP1|RAP1A|OPALIN|LGI1|SNCG|KCNA1|GRB2|PPP3CA|RDX|SEPT4|ARRB1|GABRG2|GPHN|PARK7|PPIA|ACTG1|MARCKS	387|744|969|915|663|528|741|1080|408|444|705|765|321|474|885|456|876|987|639|324|936|606|996|453|609|1029|981|975|393|807|1059|873|498|774|882|648|384|738|870|342|567|855|399|909|1023|420|957|513
GO Cellular Component	GO:1902494	Catalytic complex	1328	35	0.00041	3.38722	HSD17B10|NDUFB7|DECR1|PIK3R2|SKP1|PPP3R1|GNG13|MRPS36|PSMB7|PPP2R5A|AGL|HDAC11|NDUFS4|DDB1|CYCS|PABPC1|GRHPR|PRMT5|PKM|NDUFV1|NDUFV2|DLST|HNRNPA2B1|ACTB|MT-ND1|MYO6|RBMX|RBBP4|PDHA1|FBXL18|PSME1|PPP3CA|BCKDK|UQCRB|ENO2	417|558|1101|966|642|714|690|834|351|837|1083|552|954|450|1068|639|993|363|1026|327|933|1017|984|975|678|372|462|354|660|897|402|870|750|378|549
GO Cellular Component	GO:0044297	Cell body	588	21	0.00042	3.37675	SIRT2|PPP1R1B|SERPINF1|SLC1A3|SLC1A2|CCT8|S100B|SERPINI1|SCN1A|GLUL|ACSL4|DPYSL3|MT-ND1|EZR|SNCG|KCNA1|CCT4|ERMN|CST3|PARK7|ENO2	969|915|771|663|1080|717|531|645|885|876|501|609|678|807|648|384|348|306|438|1023|549
GO Cellular Component	GO:0070469	Respirasome	95	8	0.001	3	NDUFB7|COX6B1|NDUFS4|CYCS|NDUFV1|NDUFV2|MT-ND1|UQCRB	558|798|954|1068|327|933|678|378
GO Cellular Component	GO:0033270	Paranode region of axon	12	4	0.001	3	SIRT2|KCNA1|MAG|ERMN	969|384|1053|306
GO Cellular Component	GO:0030863	Cortical cytoskeleton	96	8	0.0011	2.95861	SLC4A1|COTL1|CFL2|CALB2|ACTB|EZR|RDX|SPTB	540|579|414|456|975|807|342|447
GO Cellular Component	GO:0044304	Main axon	70	7	0.0011	2.95861	SIRT2|SLC1A2|SCN1A|NAV1|KCNA1|MAG|ERMN	969|1080|885|906|384|1053|306
GO Cellular Component	GO:0098796	Membrane protein complex	1141	30	0.0017	2.76955	NDUFB7|PIK3R2|COX6B1|GNG13|MTX2|HCN2|LRRC8A|SLC7A5|SLC9A3R1|SLC1A3|ATP6V1B2|SLC1A2|GJA1|ATP1B3|NDUFS4|SCN1A|SSR4|NDUFV1|NDUFV2|NPLOC4|AGK|MT-ND1|SGIP1|ATP6V1G1|KCNA1|GRB2|HSPA2|TF|GABRG2|UQCRB	558|966|798|690|516|318|486|459|366|663|546|1080|444|426|954|885|1095|327|933|504|762|678|468|732|384|738|594|633|399|378
GO Cellular Component	GO:0005862	Muscle thin filament tropomyosin	4	3	0.0017	2.76955	TPM4|TPM1|TPM3	1029|852|495
GO Cellular Component	GO:0031410	Cytoplasmic vesicle	2386	50	0.0018	2.74473	ZFYVE21|AHCY|SCG3|ALDOC|SERPINF1|PSMB7|COTL1|SLC1A3|ATP6V1B2|TMEM163|GJA1|ATP1B3|CCT8|AGL|ARPC5|SERPINI1|APEH|TPP1|LGI3|PKM|LRRC16A|GYG1|PRDX6|DPYSL3|PNP|ILF2|EZR|SYT2|RAP1A|MYO6|SGIP1|PTPN1|PADI2|KCNA1|GRB2|CCT4|ALDOA|CST3|TF|GCA|SEPT4|NAPEPLD|ARRB1|GABRG2|FNBP1|PPIA|TMEM33|METTL7A|ACTG1|TPT1	387|777|624|759|771|351|579|663|546|408|444|426|717|1083|765|645|1020|510|474|1026|1014|591|471|609|849|309|807|1059|498|372|468|693|1089|384|738|348|858|438|633|390|567|672|855|399|1107|420|786|675|957|555
GO Cellular Component	GO:0098803	Respiratory chain complex	80	7	0.0023	2.63827	NDUFB7|COX6B1|NDUFS4|NDUFV1|NDUFV2|MT-ND1|UQCRB	558|798|954|327|933|678|378
GO Cellular Component	GO:0005856	Cytoskeleton	2221	47	0.0024	2.61979	ALDOC|SKP1|SIRT2|PPP2R5A|SLC4A1|COTL1|SLC9A3R1|CAPZA1|HNMT|CCT8|ARPC5|CFL2|JAM3|CALB2|DPYSL2|BASP1|LRRC16A|SYNM|SNCA|DPYSL3|TPM4|ARPC5L|ACTB|TPM1|PNP|EZR|NAV1|TPM3|MYO6|SGIP1|RABL6|SNCG|CCT4|HSPA2|ALDOA|ERMN|RDX|PREPL|FAM96B|CAPZB|SEPT4|FNBP1|GPHN|SPTB|ACTG1|TPT1|MARCKS	759|642|969|837|540|579|366|612|894|717|765|414|321|456|801|324|1014|996|453|609|1029|981|975|852|849|807|906|495|372|468|312|648|348|594|858|306|342|381|603|657|567|1107|909|447|957|555|513
GO Cellular Component	GO:0031674	I band	143	9	0.0024	2.61979	PPP2R5A|SLC4A1|SRI|S100A1|CFL2|SCN1A|CSRP1|PPP3CA|ALDOA	837|540|741|375|414|885|873|870|858
GO Cellular Component	GO:0099503	Secretory vesicle	1010	27	0.0028	2.55284	SCG3|ALDOC|PSMB7|COTL1|TMEM163|CCT8|AGL|ARPC5|SERPINI1|APEH|LGI3|PKM|GYG1|PRDX6|DPYSL3|PNP|ILF2|SYT2|RAP1A|PADI2|ALDOA|CST3|TF|GCA|SEPT4|PPIA|METTL7A	624|759|351|579|408|717|1083|765|645|1020|474|1026|591|471|609|849|309|1059|498|1089|858|438|633|390|567|420|675
GO Cellular Component	GO:0005902	Microvillus	86	7	0.0032	2.49485	SLC9A3R1|ATP6V1B2|CA2|JAM3|EZR|MYO6|RDX	366|546|945|321|807|372|342
GO Cellular Component	GO:0031941	Filamentous actin	36	5	0.0032	2.49485	JAM3|LRRC16A|DPYSL3|MYO6|ACTG1	321|1014|609|372|957
GO Cellular Component	GO:0150034	Distal axon	310	13	0.0035	2.45593	SIRT2|SRI|ARPC5|CALB2|GLUL|BASP1|SNCA|DPYSL3|ACTB|PREX1|KCNA1|NDRG2|ACTG1	969|741|765|456|876|324|453|609|975|1062|384|615|957
GO Cellular Component	GO:0043232	Intracellular non-membrane-bounded organelle	4880	84	0.0036	2.4437	TIMM13|IDH3G|ALDOC|SKP1|PPP1R7|SIRT2|MTX2|PTCD3|MRPS36|PPP2R5A|SLC4A1|COTL1|SLC9A3R1|CAPZA1|SRI|NONO|MRPL49|HNMT|CCT8|S100A1|ARPC5|CFL2|JAM3|TERF2IP|DDB1|SCN1A|CALB2|DPYSL2|PABPC1|BASP1|LRRC16A|MRPL12|SYNM|SNCA|ACSL4|DPYSL3|TPM4|ARPC5L|HNRNPA2B1|ACTB|TPM1|PNP|ILF2|ACAT2|EZR|NUCKS1|NAV1|CSRP1|TPM3|MYO6|RBMX|SGIP1|RABL6|SNCG|RBBP4|PADI2|PDHA1|GRB2|CCT4|HSPA2|PPP3CA|ALDOA|DEK|ERMN|CST3|RDX|HIST2H3A|…	588|1047|759|642|483|969|516|918|834|837|540|579|366|612|741|1077|1056|894|717|375|765|414|321|600|450|885|456|801|639|324|1014|879|996|453|501|609|1029|981|984|975|852|849|309|960|807|1074|906|873|495|372|462|468|312|648|354|1089|660|738|348|594|870|858|927|306|438|342|477|381|603|651|657|567|819|855|1107|909|1023|726|675|447|957|555|513|708
GO Cellular Component	GO:0070161	Anchoring junction	820	23	0.0044	2.35655	ZFYVE21|SIRT2|TNC|GJA1|ARPC5|JAM3|SCN1A|CALB2|PABPC1|SYNM|TPM4|ARPC5L|ACTB|EZR|CSRP1|OPALIN|GRB2|PPP3CA|RDX|PARK7|PPIA|ACTG1|MARCKS	387|969|528|444|765|321|885|456|639|996|1029|981|975|807|873|774|738|870|342|1023|420|957|513
GO Cellular Component	GO:0031252	Cell leading edge	425	15	0.0062	2.20761	SLC9A3R1|ATP6V1B2|SLC1A2|S100B|ARPC5|PABPC1|PSD3|LRRC16A|DPYSL3|ACTB|TPM1|EZR|MYO6|RDX|GABRG2	366|546|1080|531|765|639|606|1014|609|975|852|807|372|342|399
GO Cellular Component	GO:0030018	Z disc	131	8	0.0062	2.20761	PPP2R5A|SLC4A1|SRI|S100A1|CFL2|SCN1A|CSRP1|PPP3CA	837|540|741|375|414|885|873|870
GO Cellular Component	GO:0030141	Secretory granule	845	23	0.0064	2.19382	SCG3|ALDOC|PSMB7|COTL1|CCT8|AGL|ARPC5|SERPINI1|APEH|PKM|GYG1|PRDX6|PNP|ILF2|SYT2|RAP1A|PADI2|ALDOA|CST3|TF|GCA|PPIA|METTL7A	624|759|351|579|717|1083|765|645|1020|1026|591|471|849|309|1059|498|1089|858|438|633|390|420|675
GO Cellular Component	GO:0099080	Supramolecular complex	1261	30	0.0071	2.14874	SIRT2|PPP2R5A|SLC4A1|SRI|CCT8|S100A1|CFL2|JAM3|SCN1A|PABPC1|LRRC16A|SYNM|SNCA|DPYSL3|TPM4|ACTB|TPM1|EZR|NAV1|CSRP1|TPM3|MYO6|CCT4|PPP3CA|ALDOA|DEK|CST3|CAPZB|ACTG1|TPT1	969|837|540|741|717|375|414|321|885|639|1014|996|453|609|1029|975|852|807|906|873|495|372|348|870|858|927|438|657|957|555
GO Cellular Component	GO:0036477	Somatodendritic compartment	852	23	0.0071	2.14874	GNG13|SIRT2|PPP1R1B|SERPINF1|SLC1A3|SRI|S100B|SERPINI1|SCN1A|CALB2|GLUL|ACSL4|GRM7|MT-ND1|PREX1|SNCG|KCNA1|PPP3CA|ERMN|CST3|ARRB1|GPHN|ENO2	690|969|915|771|663|741|531|645|885|456|876|501|393|678|1062|648|384|870|306|438|855|909|549
GO Cellular Component	GO:0101031	Chaperone complex	24	4	0.0072	2.14267	CDC37|CCT8|STIP1|CCT4	1005|717|537|348
GO Cellular Component	GO:0042470	Melanosome	104	7	0.0081	2.09151	AHCY|SERPINF1|ATP6V1B2|ATP1B3|TPP1|CCT4|TMEM33	777|771|546|426|510|348|786
GO Cellular Component	GO:0005747	Mitochondrial respiratory chain complex i	48	5	0.0089	2.05061	NDUFB7|NDUFS4|NDUFV1|NDUFV2|MT-ND1	558|954|327|933|678
GO Cellular Component	GO:0045240	Dihydrolipoyl dehydrogenase complex	10	3	0.0092	2.03621	MRPS36|DLST|BCKDK	834|1017|750
GO Cellular Component	GO:0005925	Focal adhesion	405	14	0.0104	1.98297	ZFYVE21|TNC|GJA1|ARPC5|PABPC1|TPM4|ARPC5L|ACTB|EZR|CSRP1|RDX|PPIA|ACTG1|MARCKS	387|528|444|765|639|1029|981|975|807|873|342|420|957|513
GO Cellular Component	GO:0043220	Schmidt-Lanterman incisure	11	3	0.0113	1.94692	SIRT2|JAM3|MAG	969|321|1053
GO Cellular Component	GO:0005758	Mitochondrial intermembrane space	81	6	0.012	1.92082	NDUFB7|TIMM13|CYCS|AGK|GATM|PARK7	558|588|1068|762|867|1023
GO Cellular Component	GO:0005782	Peroxisomal matrix	54	5	0.0133	1.87615	ACOT8|CRYM|GRHPR|CRAT|EPHX2	921|525|993|411|492
GO Cellular Component	GO:0005746	Mitochondrial respirasome	84	6	0.0137	1.86328	NDUFB7|NDUFS4|NDUFV1|NDUFV2|MT-ND1|UQCRB	558|954|327|933|678|378
GO Cellular Component	GO:1904724	Tertiary granule lumen	55	5	0.0139	1.85699	ALDOC|ILF2|ALDOA|CST3|METTL7A	759|309|858|438|675
GO Cellular Component	GO:0098793	Presynapse	526	16	0.0146	1.83565	SRI|SLC1A2|TMEM163|CTBP1|LGI3|CALB2|GLUL|SNCB|SNCA|ACTB|GRM7|SYT2|KCNA1|SEPT4|PARK7|ACTG1	741|1080|408|705|474|456|876|987|453|975|393|1059|384|567|1023|957
GO Cellular Component	GO:0098590	Plasma membrane region	1219	28	0.0158	1.80134	SLC27A1|SLC7A5|SLC4A1|SLC9A3R1|SLC1A3|ATP6V1B2|SLC1A2|GJA1|CA2|ATP1B3|CALB2|FAIM2|PSD3|GRM7|TPM1|EZR|AHCYL1|MYO6|SGIP1|KCNA1|RDX|TF|SLC4A4|NAPEPLD|ARRB1|GABRG2|FNBP1|GPHN	429|459|540|366|663|546|1080|444|945|426|456|936|606|393|852|807|627|372|468|384|342|633|576|672|855|399|1107|909
GO Cellular Component	GO:0097386	Glial cell projection	34	4	0.0189	1.72354	SIRT2|SLC1A2|GLUL|EZR	969|1080|876|807
GO Cellular Component	GO:0098800	Inner mitochondrial membrane protein complex	131	7	0.0233	1.63264	NDUFB7|NDUFS4|NDUFV1|NDUFV2|AGK|MT-ND1|UQCRB	558|954|327|933|762|678|378
GO Cellular Component	GO:0042383	Sarcolemma	132	7	0.024	1.61979	PPP3R1|SRI|SCN1A|SYNM|EZR|PPP3CA|RDX	714|741|885|996|807|870|342
GO Cellular Component	GO:0098858	Actin-based cell projection	214	9	0.0245	1.61083	SLC9A3R1|ATP6V1B2|CA2|JAM3|CALB2|EZR|MYO6|ERMN|RDX	366|546|945|321|456|807|372|306|342
GO Cellular Component	GO:0030864	Cortical actin cytoskeleton	68	5	0.0302	1.51999	COTL1|CFL2|CALB2|RDX|SPTB	579|414|456|342|447
GO Cellular Component	GO:0043025	Neuronal cell body	518	15	0.0305	1.5157	SIRT2|PPP1R1B|SERPINF1|SLC1A3|S100B|SERPINI1|SCN1A|GLUL|ACSL4|MT-ND1|SNCG|KCNA1|ERMN|CST3|ENO2	969|915|771|663|531|645|885|876|501|678|648|384|306|438|549
GO Cellular Component	GO:0001726	Ruffle	179	8	0.0305	1.5157	SLC9A3R1|ATP6V1B2|S100B|PSD3|TPM1|EZR|MYO6|RDX	366|546|531|606|852|807|372|342
GO Cellular Component	GO:0045202	Synapse	1351	29	0.0312	1.50585	PPP1R1B|SLC1A3|SRI|SLC1A2|TMEM163|CTBP1|LGI3|CALB2|GLUL|SNCB|FAIM2|PSD3|SNCA|DPYSL3|ARPC5L|ACTB|GRM7|SYT2|RAP1A|LGI1|SNCG|KCNA1|PPP3CA|SEPT4|ARRB1|GABRG2|GPHN|PARK7|ACTG1	915|663|741|1080|408|705|474|456|876|987|936|606|453|609|981|975|393|1059|498|882|648|384|870|567|855|399|909|1023|957
GO Cellular Component	GO:0005905	Clathrin-coated pit	69	5	0.0312	1.50585	MYO6|SGIP1|TF|ARRB1|FNBP1	372|468|633|855|1107
GO Cellular Component	GO:0009925	Basal plasma membrane	44	4	0.041	1.38722	SLC27A1|SLC7A5|SLC1A3|TF	429|459|663|633
GO Cellular Component	GO:0016323	Basolateral plasma membrane	237	9	0.0445	1.35164	SLC27A1|SLC7A5|SLC4A1|SLC1A3|CA2|EZR|TF|SLC4A4|ARRB1	429|459|540|663|945|807|633|576|855
GO Cellular Component	GO:0005947	Mitochondrial alpha-ketoglutarate dehydrogenase complex	5	2	0.0459	1.33819	MRPS36|BCKDK	834|750
GO Cellular Component	GO:0005955	Calcineurin complex	5	2	0.0459	1.33819	PPP3R1|PPP3CA	714|870
GO Cellular Component	GO:0030427	Site of polarized growth	195	8	0.0469	1.32883	SIRT2|COTL1|ARPC5|BASP1|SNCA|DPYSL3|PREX1|NDRG2	969|579|765|324|453|609|1062|615
GO Molecular Function	GO:0016491	Oxidoreductase activity	726	39	3.37e-11	10.4724	HSD17B10|NDUFB7|IDH3G|CRYM|DECR1|SPR|AKR7A2|COX6B1|ALDH2|HIBADH|L2HGDH|GLUD1|QDPR|CTBP1|ADH5|NDUFS4|ALDH1A1|VAT1L|CYCS|GRHPR|ALDH5A1|CRAT|NDUFV1|NDUFV2|SNCA|PRDX6|ALDH9A1|MT-ND1|HSD17B8|ALDH4A1|PDHA1|CRYZL1|TXNRD2|ALDH7A1|SELENBP1|CRYZ|OXR1|GPHN|PARK7	417|558|1047|525|1101|831|522|798|999|813|573|963|396|705|423|954|1011|357|1068|993|792|411|327|933|453|471|666|678|333|720|660|942|912|783|651|828|819|909|1023
GO Molecular Function	GO:0042802	Identical protein binding	1896	58	3.68e-08	7.43415	ST13|AHCY|CRYM|DECR1|NAMPT|HCN2|LRRC8A|SLC4A1|SRI|NONO|GLUD1|QDPR|CTBP1|S100B|S100A1|ADH5|APEH|HPRT1|JAM3|GLUL|DPYSL2|GRHPR|ALDH5A1|PRMT5|PKM|SNCA|GYG1|PRDX6|DPYSL3|TPM4|HNRNPA2B1|ACTB|TPM1|PNP|EZR|AHCYL1|MYO6|RBMX|ALDH4A1|PADI2|ACOT7|NADK2|MAG|GRB2|ALDOA|FAM98B|CST3|PAICS|SLC4A4|GCA|SEPT4|NAPEPLD|FNBP1|PARK7|EPHX2|DBI|ACTG1|MARCKS	816|777|525|1101|744|318|486|540|741|1077|963|396|705|531|375|423|1020|804|321|876|801|993|792|363|1026|453|591|471|609|1029|984|975|852|849|807|627|372|462|720|1089|723|900|1053|738|858|696|438|684|576|390|567|672|1107|1023|492|534|957|513
GO Molecular Function	GO:0051287	NAD binding	56	12	3.68e-08	7.43415	AHCY|IDH3G|SIRT2|ALDH2|HIBADH|GLUD1|QDPR|CTBP1|ALDH1A1|GRHPR|NDUFV1|HSD17B8	777|1047|969|999|813|963|396|705|1011|993|327|333
GO Molecular Function	GO:0003824	Catalytic activity	5486	113	4.63e-08	7.33442	HSD17B10|NDUFB7|ACO2|PCK2|AHCY|ACOT8|IDH3G|CRYM|DECR1|NAMPT|ALDOC|PPP3R1|SPR|AKR7A2|GDA|COX6B1|GNG13|SIRT2|SLC27A1|EIF2S3|LRRC8A|PSMB7|PPP2R5A|ALDH2|HIBADH|L2HGDH|ABHD10|ATP6V1B2|GLUD1|HNMT|QDPR|CA2|CCT8|CTBP1|AGL|HDAC11|ADH5|APEH|NDUFS4|ALDH1A1|HPRT1|TPP1|LGI3|VAT1L|CYCS|GLUL|DPYSL2|GRHPR|ALDH5A1|CRAT|MPI|PRMT5|PKM|NDUFV1|NDUFV2|PGP|DLST|SNCA|ACSL4|GYG1|PRDX6|DPYSL3|ALDH9A1|AGK|GMPPA|PNP|MT-ND1|…	417|558|978|585|777|921|1047|525|1101|744|759|714|831|522|822|798|690|969|429|561|486|351|837|999|813|573|699|546|963|894|396|945|717|705|1083|552|423|1020|954|1011|804|510|474|357|1068|876|801|993|792|411|951|363|1026|327|933|780|1017|453|501|591|471|609|666|762|990|849|678|960|1071|405|498|372|693|702|732|333|720|432|1089|723|687|660|942|846|900|825|594|870|750|858|867|696|972|684|912|381|783|1…
GO Molecular Function	GO:0005515	Protein binding	7026	130	6.05e-07	6.21824	ST13|AHCY|CRYM|DECR1|CDC37|PIK3R2|NAMPT|ALDOC|SKP1|HSPE1|PPP3R1|GNG13|SIRT2|HCN2|EIF2S3|PPP1R1B|LRRC8A|PEBP1|PPP2R5A|SLC4A1|COTL1|SLC9A3R1|CAPZA1|CNRIP1|TNC|SRI|NONO|GLUD1|QDPR|GJA1|ATP1B3|VBP1|CCT8|ELMO2|CTBP1|S100B|S100A1|AGL|ARPC5|HDAC11|ADH5|APEH|CFL2|HPRT1|JAM3|TERF2IP|DDB1|GLUL|DPYSL2|ELMO1|PABPC1|GRHPR|ALDH5A1|PRMT5|CHORDC1|BASP1|PKM|PSD3|NPLOC4|SYNM|SNCA|GYG1|PRDX6|DPYSL3|TPM4|ARPC5L|HNRN…	816|777|525|1101|1005|966|744|759|642|570|714|690|969|318|561|915|486|654|837|540|579|366|612|891|528|741|1077|963|396|444|426|747|717|729|705|531|375|1083|765|552|423|1020|414|804|321|600|450|876|801|582|639|993|792|363|564|324|1026|606|504|996|453|591|471|609|1029|981|984|975|393|852|537|849|843|807|1074|1059|873|1071|495|498|627|372|840|462|468|882|693|1062|903|354|465|732|888|720|1089|723|110…
GO Molecular Function	GO:0016620	Oxidoreductase activity, acting on the aldehyde or oxo group of donors, nad or nadp as acceptor	31	8	8.17e-06	5.08778	ALDH2|ADH5|ALDH1A1|ALDH5A1|ALDH9A1|ALDH4A1|PDHA1|ALDH7A1	999|423|1011|792|666|720|660|783
GO Molecular Function	GO:0036094	Small molecule binding	2516	60	4.84e-05	4.31515	ST13|PCK2|AHCY|IDH3G|CRYM|DECR1|HSPE1|SPR|SIRT2|HCN2|SLC27A1|EIF2S3|PMP2|PEBP1|ALDH2|SLC1A3|HIBADH|ATP6V1B2|GLUD1|QDPR|CCT8|CTBP1|ADH5|ALDH1A1|HPRT1|GLUL|GRHPR|PRMT5|CHORDC1|PKM|NDUFV1|ACSL4|AGK|ACTB|GRM7|PNP|SYT2|RAP1A|MYO6|PTGDS|RABL6|FABP3|HSD17B8|SKIV2L|ACOT7|CRYZL1|AK3|NADK2|MAG|CCT4|HSPA2|BCKDK|ALDOA|PAICS|TXNRD2|CRYZ|SEPT4|GPHN|DBI|ACTG1	816|585|777|1047|525|1101|570|831|969|318|429|561|768|654|999|663|813|546|963|396|717|705|423|1011|804|876|993|363|564|1026|327|501|762|975|393|849|1059|498|372|702|312|465|333|432|723|942|846|900|1053|348|594|750|858|684|912|828|567|909|534|957
GO Molecular Function	GO:0004029	Aldehyde dehydrogenase (nad+) activity	15	6	4.84e-05	4.31515	ALDH2|ADH5|ALDH1A1|ALDH9A1|ALDH4A1|ALDH7A1	999|423|1011|666|720|783
GO Molecular Function	GO:0008092	Cytoskeletal protein binding	973	32	9.6e-05	4.01773	ALDOC|SLC4A1|COTL1|SLC9A3R1|CAPZA1|GJA1|VBP1|S100B|ARPC5|CFL2|DPYSL2|SYNM|SNCA|DPYSL3|TPM4|ARPC5L|ACTB|TPM1|EZR|CSRP1|TPM3|MYO6|SGIP1|FABP3|HSPA2|ALDOA|ERMN|DAAM2|RDX|CAPZB|SPTB|MARCKS	759|540|579|366|612|444|747|531|765|414|801|996|453|609|1029|981|975|852|807|873|495|372|468|465|594|858|306|1086|342|657|447|513
GO Molecular Function	GO:0050661	NADP binding	54	8	0.00018	3.74473	CRYM|DECR1|SPR|HIBADH|QDPR|GRHPR|CRYZL1|CRYZ	525|1101|831|813|396|993|942|828
GO Molecular Function	GO:0005488	Binding	12516	184	0.00024	3.61979	HSD17B10|TIMM13|ST13|ACO2|ZFYVE21|PCK2|AHCY|IDH3G|CRYM|SCG3|DECR1|CDC37|PIK3R2|NAMPT|ALDOC|SKP1|HSPE1|PPP3R1|SPR|GDA|GNG13|SIRT2|HCN2|SLC27A1|EIF2S3|PPP1R1B|PTCD3|PMP2|LRRC8A|PEBP1|PPP2R5A|SLC7A5|ALDH2|SLC4A1|COTL1|SLC9A3R1|CAPZA1|CNRIP1|SLC1A3|TNC|HIBADH|SRI|NONO|ATP6V1B2|GLUD1|SLC1A2|DENR|QDPR|TMEM163|GJA1|CA2|ATP1B3|VBP1|CCT8|ELMO2|CTBP1|S100B|S100A1|AGL|ARPC5|HDAC11|ADH5|APEH|ALDH1A1|CFL2|HPR…	417|588|816|978|387|585|777|1047|525|624|1101|1005|966|744|759|642|570|714|831|822|690|969|318|429|561|915|918|768|486|654|837|459|999|540|579|366|612|891|663|528|813|741|1077|546|963|1080|789|396|408|444|945|426|747|717|729|705|531|375|1083|765|552|423|1020|1011|414|804|321|510|600|450|357|456|1068|876|987|801|582|639|993|792|951|363|564|324|1026|327|606|933|780|504|1014|879|996|453|501|591|471|…
GO Molecular Function	GO:0051015	Actin filament binding	199	13	0.00035	3.45593	COTL1|CAPZA1|CFL2|TPM4|ARPC5L|TPM1|EZR|TPM3|MYO6|ERMN|CAPZB|SPTB|MARCKS	579|612|414|1029|981|852|807|495|372|306|657|447|513
GO Molecular Function	GO:0000166	Nucleotide binding	2119	50	0.00056	3.25181	ST13|PCK2|AHCY|IDH3G|CRYM|DECR1|HSPE1|SPR|SIRT2|HCN2|SLC27A1|EIF2S3|PEBP1|ALDH2|HIBADH|ATP6V1B2|GLUD1|QDPR|CCT8|CTBP1|ALDH1A1|HPRT1|GLUL|GRHPR|PRMT5|CHORDC1|PKM|NDUFV1|ACSL4|AGK|ACTB|RAP1A|MYO6|RABL6|HSD17B8|SKIV2L|ACOT7|CRYZL1|AK3|NADK2|CCT4|HSPA2|BCKDK|PAICS|TXNRD2|CRYZ|SEPT4|GPHN|DBI|ACTG1	816|585|777|1047|525|1101|570|831|969|318|429|561|654|999|813|546|963|396|717|705|1011|804|876|993|363|564|1026|327|501|762|975|498|372|312|333|432|723|942|846|900|348|594|750|684|912|828|567|909|534|957
GO Molecular Function	GO:0016614	Oxidoreductase activity, acting on ch-oh group of donors	130	10	0.0013	2.88606	HSD17B10|IDH3G|SPR|AKR7A2|HIBADH|L2HGDH|CTBP1|ADH5|GRHPR|HSD17B8	417|1047|831|522|813|573|705|423|993|333
GO Molecular Function	GO:0003779	Actin binding	438	18	0.0016	2.79588	COTL1|CAPZA1|ARPC5|CFL2|SNCA|TPM4|ARPC5L|TPM1|EZR|TPM3|MYO6|ALDOA|ERMN|DAAM2|RDX|CAPZB|SPTB|MARCKS	579|612|765|414|453|1029|981|852|807|495|372|858|306|1086|342|657|447|513
GO Molecular Function	GO:0016655	Oxidoreductase activity, acting on nad(p)h, quinone or similar compound as acceptor	61	7	0.0026	2.58503	NDUFB7|NDUFS4|NDUFV1|NDUFV2|MT-ND1|CRYZL1|CRYZ	558|954|327|933|678|942|828
GO Molecular Function	GO:0016829	Lyase activity	184	11	0.0035	2.45593	ACO2|PCK2|ALDOC|CA2|ECHS1|FECH|ALDOA|PAICS|PARK7|ECHDC1|ENO2	978|585|759|945|405|825|858|684|1023|345|549
GO Molecular Function	GO:0016616	Oxidoreductase activity, acting on the ch-oh group of donors, nad or nadp as acceptor	122	9	0.004	2.39794	HSD17B10|IDH3G|SPR|AKR7A2|HIBADH|CTBP1|ADH5|GRHPR|HSD17B8	417|1047|831|522|813|705|423|993|333
GO Molecular Function	GO:0009055	Electron transfer activity	103	8	0.0077	2.11351	AKR7A2|COX6B1|ALDH2|QDPR|ADH5|CYCS|NDUFV2|ALDH4A1	522|798|999|396|423|1068|933|720
GO Molecular Function	GO:0070402	NADPH binding	15	4	0.009	2.04576	DECR1|QDPR|GRHPR|CRYZ	1101|396|993|828
GO Molecular Function	GO:0016651	Oxidoreductase activity, acting on nad(p)h	107	8	0.0091	2.04096	NDUFB7|NDUFS4|NDUFV1|NDUFV2|MT-ND1|CRYZL1|TXNRD2|CRYZ	558|954|327|933|678|942|912|828
GO Molecular Function	GO:0044877	Protein-containing complex binding	1216	31	0.0092	2.03621	ST13|PTCD3|COTL1|SLC9A3R1|CAPZA1|CFL2|JAM3|DDB1|PRMT5|PKM|LRRC16A|SYNM|SNCA|TPM4|ARPC5L|TPM1|EZR|TPM3|RAP1A|MYO6|PTPN1|GRB2|PPP3CA|ERMN|CAPZB|ARRB1|PARK7|MRPS27|PGAM5|SPTB|MARCKS	816|918|579|366|612|414|321|450|363|1026|1014|996|453|1029|981|852|807|495|498|372|693|738|870|306|657|855|1023|726|1008|447|513
GO Molecular Function	GO:0000287	Magnesium ion binding	215	11	0.0103	1.98716	IDH3G|HPRT1|GLUL|PKM|PGP|SNCA|HDHD1|SEPT4|EPHX2|ENO2|NUDT3	1047|804|876|1026|780|453|1050|567|492|549|330
GO Molecular Function	GO:0016836	Hydro-lyase activity	57	6	0.0119	1.92445	ACO2|CA2|ECHS1|PARK7|ECHDC1|ENO2	978|945|405|1023|345|549
GO Molecular Function	GO:0043878	glyceraldehyde-3-phosphate dehydrogenase (NAD+) (non-phosphorylating) activity	6	3	0.015	1.82391	ALDH2|ALDH9A1|ALDH7A1	999|666|783
GO Molecular Function	GO:1903136	Cuprous ion binding	6	3	0.015	1.82391	SNCB|SNCA|PARK7	987|453|1023
GO Molecular Function	GO:0019904	Protein domain specific binding	716	21	0.0202	1.69465	ST13|SKP1|PPP3R1|SLC9A3R1|GJA1|ELMO2|CTBP1|DDB1|ELMO1|BASP1|DPYSL3|GRM7|EZR|RBMX|SGIP1|SH3BGRL|KCNA1|GRB2|HSPA2|RDX|HIST1H4A	816|642|714|366|444|729|705|450|582|324|609|393|807|462|468|903|384|738|594|342|708
GO Molecular Function	GO:0045296	Cadherin binding	334	13	0.0275	1.56067	EIF2S3|CAPZA1|CCT8|PKM|PRDX6|EZR|PCMT1|PTPN1|ALDOA|PAICS|RDX|CAPZB|PARK7	561|612|717|1026|471|807|1071|693|858|684|342|657|1023
GO Molecular Function	GO:0008137	NADH dehydrogenase (ubiquinone) activity	46	5	0.0327	1.48545	NDUFB7|NDUFS4|NDUFV1|NDUFV2|MT-ND1	558|954|327|933|678
GO Molecular Function	GO:0031406	Carboxylic acid binding	218	10	0.0359	1.44491	PMP2|SLC1A3|GLUD1|ADH5|GLUL|GRHPR|GRM7|PTGDS|FABP3|MAG	768|663|963|423|876|993|393|702|465|1053
GO Molecular Function	GO:0051082	Unfolded protein binding	108	7	0.0383	1.4168	ST13|CDC37|HSPE1|CCT8|CCT4|HSPA2|PPIA	816|1005|570|717|348|594|420
GO Molecular Function	GO:0043168	Anion binding	2805	53	0.04	1.39794	ST13|PCK2|IDH3G|DECR1|HSPE1|SIRT2|HCN2|EIF2S3|PMP2|PEBP1|SLC1A3|ATP6V1B2|GLUD1|QDPR|CCT8|ADH5|TPP1|GLUL|GRHPR|CHORDC1|PKM|NDUFV1|SNCA|ACSL4|DPYSL3|AGK|ACTB|GRM7|PNP|SYT2|RAP1A|MYO6|SGIP1|PTGDS|RABL6|PREX1|FABP3|HSD17B8|SKIV2L|ACOT7|AK3|NADK2|MAG|CCT4|HSPA2|BCKDK|PAICS|TXNRD2|CRYZ|SEPT4|GPHN|DBI|ACTG1	816|585|1047|1101|570|969|318|561|768|654|663|546|963|396|717|423|510|876|993|564|1026|327|453|501|609|762|975|393|849|1059|498|372|468|702|312|1062|465|333|432|723|846|900|1053|348|594|750|684|912|828|567|909|534|957
GO Molecular Function	GO:0016830	Carbon-carbon lyase activity	50	5	0.04	1.39794	PCK2|ALDOC|ALDOA|PAICS|ECHDC1	585|759|858|684|345
GO Molecular Function	GO:0016595	Glutamate binding	11	3	0.0436	1.36051	SLC1A3|GLUL|GRM7	663|876|393
GO Molecular Function	GO:0061135	Endopeptidase regulator activity	190	9	0.0479	1.31966	SERPINF1|PEBP1|SERPINI1|SNCA|AGT|SERPINB9|PSME1|CST3|ARRB1	771|654|645|453|843|1104|402|438|855
KEGG Pathways	hsa01100	Metabolic pathways	1447	62	4.2e-16	15.3768	HSD17B10|NDUFB7|ACO2|PCK2|AHCY|ACOT8|IDH3G|NAMPT|ALDOC|SPR|GDA|COX6B1|SIRT2|ALDH2|HIBADH|L2HGDH|ATP6V1B2|GLUD1|HNMT|QDPR|CA2|AGL|ADH5|NDUFS4|ALDH1A1|HPRT1|GLUL|GRHPR|ALDH5A1|MPI|PKM|NDUFV1|NDUFV2|PGP|DLST|ACSL4|GYG1|PRDX6|ALDH9A1|AGK|GMPPA|PNP|MT-ND1|ACAT2|ECHS1|AHCYL1|PTGDS|ATP6V1G1|HSD17B8|ALDH4A1|NADK2|FECH|ALDOA|GATM|PAICS|ALDH7A1|SELENBP1|GAMT|EPHX2|UQCRB|ECHDC1|ENO2	417|558|978|585|777|921|1047|744|759|831|822|798|969|999|813|573|546|963|894|396|945|1083|423|954|1011|804|876|993|792|951|1026|327|933|780|1017|501|591|471|666|762|990|849|678|960|405|627|702|732|333|720|900|825|858|867|684|783|651|339|492|378|345|549
KEGG Pathways	hsa01200	Carbon metabolism	117	12	7.28e-06	5.13787	ACO2|IDH3G|ALDOC|GLUD1|ADH5|PKM|PGP|DLST|ACAT2|ECHS1|ALDOA|ENO2	978|1047|759|963|423|1026|780|1017|960|405|858|549
KEGG Pathways	hsa00010	Glycolysis / Gluconeogenesis	65	9	2.45e-05	4.61083	PCK2|ALDOC|ALDH2|ADH5|PKM|ALDH9A1|ALDOA|ALDH7A1|ENO2	585|759|999|423|1026|666|858|783|549
KEGG Pathways	hsa00620	Pyruvate metabolism	38	7	7.66e-05	4.11577	PCK2|ALDH2|GRHPR|PKM|ALDH9A1|ACAT2|ALDH7A1	585|999|993|1026|666|960|783
KEGG Pathways	hsa00071	Fatty acid degradation	42	7	0.00011	3.95861	ALDH2|ADH5|ACSL4|ALDH9A1|ACAT2|ECHS1|ALDH7A1	999|423|501|666|960|405|783
KEGG Pathways	hsa00280	Valine, leucine and isoleucine degradation	46	7	0.00016	3.79588	HSD17B10|ALDH2|HIBADH|ALDH9A1|ACAT2|ECHS1|ALDH7A1	417|999|813|666|960|405|783
KEGG Pathways	hsa05020	Prion disease	265	14	0.0003	3.52288	NDUFB7|PIK3R2|PPP3R1|COX6B1|PSMB7|NDUFS4|CYCS|NDUFV1|NDUFV2|STIP1|MT-ND1|HSPA2|PPP3CA|UQCRB	558|966|714|798|351|954|1068|327|933|537|678|594|870|378
KEGG Pathways	hsa00380	Tryptophan metabolism	41	6	0.00073	3.13668	ALDH2|DLST|ALDH9A1|ACAT2|ECHS1|ALDH7A1	999|1017|666|960|405|783
KEGG Pathways	hsa04964	Proximal tubule bicarbonate reclamation	23	5	0.00073	3.13668	PCK2|GLUD1|CA2|ATP1B3|SLC4A4	585|963|945|426|576
KEGG Pathways	hsa05014	Amyotrophic lateral sclerosis	352	15	0.0011	2.95861	NDUFB7|PPP3R1|COX6B1|PSMB7|SLC1A2|NDUFS4|CYCS|NDUFV1|NDUFV2|HNRNPA2B1|ACTB|MT-ND1|PPP3CA|UQCRB|ACTG1	558|714|798|351|1080|954|1068|327|933|984|975|678|870|378|957
KEGG Pathways	hsa05100	Bacterial invasion of epithelial cells	70	7	0.0011	2.95861	PIK3R2|ELMO2|ARPC5|ELMO1|ARPC5L|ACTB|ACTG1	966|729|765|582|981|975|957
KEGG Pathways	hsa00190	Oxidative phosphorylation	130	9	0.0012	2.92082	NDUFB7|COX6B1|ATP6V1B2|NDUFS4|NDUFV1|NDUFV2|MT-ND1|ATP6V1G1|UQCRB	558|798|546|954|327|933|678|732|378
KEGG Pathways	hsa01230	Biosynthesis of amino acids	73	7	0.0012	2.92082	ACO2|IDH3G|ALDOC|GLUL|PKM|ALDOA|ENO2	978|1047|759|876|1026|858|549
KEGG Pathways	hsa00330	Arginine and proline metabolism	48	6	0.0012	2.92082	ALDH2|ALDH9A1|ALDH4A1|GATM|ALDH7A1|GAMT	999|666|720|867|783|339
KEGG Pathways	hsa00630	Glyoxylate and dicarboxylate metabolism	30	5	0.0012	2.92082	ACO2|GLUL|GRHPR|PGP|ACAT2	978|876|993|780|960
KEGG Pathways	hsa05010	Alzheimer disease	355	14	0.0027	2.56864	HSD17B10|NDUFB7|PIK3R2|PPP3R1|COX6B1|PSMB7|NDUFS4|CYCS|NDUFV1|NDUFV2|SNCA|MT-ND1|PPP3CA|UQCRB	417|558|966|714|798|351|954|1068|327|933|453|678|870|378
KEGG Pathways	hsa04714	Thermogenesis	229	11	0.0027	2.56864	NDUFB7|COX6B1|NDUFS4|NDUFV1|NDUFV2|ACSL4|ACTB|MT-ND1|GRB2|UQCRB|ACTG1	558|798|954|327|933|501|975|678|738|378|957
KEGG Pathways	hsa00310	Lysine degradation	60	6	0.0027	2.56864	ALDH2|DLST|ALDH9A1|ACAT2|ECHS1|ALDH7A1	999|1017|666|960|405|783
KEGG Pathways	hsa05012	Parkinson disease	240	11	0.0035	2.45593	NDUFB7|COX6B1|PSMB7|NDUFS4|CYCS|NDUFV1|NDUFV2|SNCA|MT-ND1|PARK7|UQCRB	558|798|351|954|1068|327|933|453|678|1023|378
KEGG Pathways	hsa00340	Histidine metabolism	21	4	0.0035	2.45593	ALDH2|HNMT|ALDH9A1|ALDH7A1	999|894|666|783
KEGG Pathways	hsa04966	Collecting duct acid secretion	25	4	0.0057	2.24413	SLC4A1|ATP6V1B2|CA2|ATP6V1G1	540|546|945|732
KEGG Pathways	hsa05131	Shigellosis	218	10	0.0061	2.21467	PIK3R2|SKP1|ELMO2|ARPC5|CYCS|ELMO1|ARPC5L|ACTB|FNBP1|ACTG1	966|642|729|765|1068|582|981|975|1107|957
KEGG Pathways	hsa00650	Butanoate metabolism	27	4	0.0068	2.16749	L2HGDH|ALDH5A1|ACAT2|ECHS1	573|792|960|405
KEGG Pathways	hsa04724	Glutamatergic synapse	111	7	0.0072	2.14267	PPP3R1|GNG13|SLC1A3|SLC1A2|GLUL|GRM7|PPP3CA	714|690|663|1080|876|393|870
KEGG Pathways	hsa04932	Non-alcoholic fatty liver disease	148	8	0.0073	2.13668	NDUFB7|PIK3R2|COX6B1|NDUFS4|CYCS|NDUFV1|NDUFV2|UQCRB	558|966|798|954|1068|327|933|378
KEGG Pathways	hsa00020	Citrate cycle (TCA cycle)	29	4	0.0077	2.11351	ACO2|PCK2|IDH3G|DLST	978|585|1047|1017
KEGG Pathways	hsa00410	beta-Alanine metabolism	29	4	0.0077	2.11351	ALDH2|ALDH9A1|ECHS1|ALDH7A1	999|666|405|783
KEGG Pathways	hsa04260	Cardiac muscle contraction	87	6	0.0099	2.00436	COX6B1|ATP1B3|TPM4|TPM1|TPM3|UQCRB	798|426|1029|852|495|378
KEGG Pathways	hsa00051	Fructose and mannose metabolism	32	4	0.0099	2.00436	ALDOC|MPI|GMPPA|ALDOA	759|951|990|858
KEGG Pathways	hsa05410	Hypertrophic cardiomyopathy	89	6	0.0104	1.98297	TPM4|ACTB|TPM1|AGT|TPM3|ACTG1	1029|975|852|843|495|957
KEGG Pathways	hsa00760	Nicotinate and nicotinamide metabolism	34	4	0.0111	1.95468	NAMPT|SIRT2|PNP|NADK2	744|969|849|900
KEGG Pathways	hsa05016	Huntington disease	298	11	0.0123	1.91009	NDUFB7|COX6B1|PSMB7|SLC1A3|SLC1A2|NDUFS4|CYCS|NDUFV1|NDUFV2|MT-ND1|UQCRB	558|798|351|663|1080|954|1068|327|933|678|378
KEGG Pathways	hsa05132	Salmonella infection	209	9	0.0123	1.91009	SKP1|ELMO2|ARPC5|CYCS|ELMO1|ARPC5L|ACTB|MYO6|ACTG1	642|729|765|1068|582|981|975|372|957
KEGG Pathways	hsa05414	Dilated cardiomyopathy	95	6	0.0123	1.91009	TPM4|ACTB|TPM1|AGT|TPM3|ACTG1	1029|975|852|843|495|957
KEGG Pathways	hsa00250	Alanine, aspartate and glutamate metabolism	36	4	0.0123	1.91009	GLUD1|GLUL|ALDH5A1|ALDH4A1	963|876|792|720
KEGG Pathways	hsa00260	Glycine, serine and threonine metabolism	38	4	0.014	1.85387	GRHPR|GATM|ALDH7A1|GAMT	993|867|783|339
KEGG Pathways	hsa00910	Nitrogen metabolism	17	3	0.0145	1.83863	GLUD1|CA2|GLUL	963|945|876
KEGG Pathways	hsa05130	Pathogenic Escherichia coli infection	187	8	0.0198	1.70333	SLC9A3R1|ARPC5|CYCS|ARPC5L|ACTB|EZR|MYO6|ACTG1	366|765|1068|981|975|807|372|957
KEGG Pathways	hsa04723	Retrograde endocannabinoid signaling	145	7	0.0198	1.70333	NDUFB7|GNG13|NDUFS4|NDUFV1|NDUFV2|MT-ND1|NAPEPLD	558|690|954|327|933|678|672
KEGG Pathways	hsa04971	Gastric acid secretion	73	5	0.0198	1.70333	CA2|ATP1B3|ACTB|EZR|ACTG1	945|426|975|807|957
KEGG Pathways	hsa04670	Leukocyte transendothelial migration	109	6	0.0202	1.69465	PIK3R2|JAM3|ACTB|EZR|RAP1A|ACTG1	966|321|975|807|498|957
KEGG Pathways	hsa03320	PPAR signaling pathway	75	5	0.0207	1.68403	PCK2|SLC27A1|ACSL4|FABP3|DBI	585|429|501|465|534
KEGG Pathways	hsa04530	Tight junction	156	7	0.0258	1.58838	SLC9A3R1|JAM3|ACTB|EZR|RAP1A|RDX|ACTG1	366|321|975|807|498|342|957
KEGG Pathways	hsa05110	Vibrio cholerae infection	48	4	0.0258	1.58838	ATP6V1B2|ACTB|ATP6V1G1|ACTG1	546|975|732|957
KEGG Pathways	hsa05170	Human immunodeficiency virus 1 infection	204	8	0.0282	1.54975	PIK3R2|SKP1|PPP3R1|GNG13|CFL2|DDB1|CYCS|PPP3CA	966|642|714|690|414|450|1068|870
KEGG Pathways	hsa05206	MicroRNAs in cancer	160	7	0.0282	1.54975	PIK3R2|TNC|TPM1|EZR|GRB2|RDX|MARCKS	966|528|852|807|738|342|513
KEGG Pathways	hsa04810	Regulation of actin cytoskeleton	209	8	0.0313	1.50446	PIK3R2|ARPC5|CFL2|ARPC5L|ACTB|EZR|RDX|ACTG1	966|765|414|981|975|807|342|957
KEGG Pathways	hsa00053	Ascorbate and aldarate metabolism	26	3	0.0332	1.47886	ALDH2|ALDH9A1|ALDH7A1	999|666|783
KEGG Pathways	hsa01212	Fatty acid metabolism	54	4	0.0336	1.47366	ACSL4|ACAT2|ECHS1|HSD17B8	501|960|405|333
KEGG Pathways	hsa00230	Purine metabolism	127	6	0.0339	1.4698	GDA|HPRT1|PKM|PNP|AK3|PAICS	822|804|1026|849|846|684
KEGG Pathways	hsa04728	Dopaminergic synapse	128	6	0.0345	1.46218	GNG13|PPP1R1B|PPP2R5A|SCN1A|PPP3CA|ARRB1	690|915|837|885|870|855
KEGG Pathways	hsa04666	Fc gamma R-mediated phagocytosis	90	5	0.0349	1.45717	PIK3R2|ARPC5|CFL2|ARPC5L|MARCKS	966|765|414|981|513
KEGG Pathways	hsa00561	Glycerolipid metabolism	59	4	0.0416	1.38091	ALDH2|ALDH9A1|AGK|ALDH7A1	999|666|762|783
Reactome Pathways	HSA-1430728	Metabolism	2089	78	6e-17	16.2218	HSD17B10|NDUFB7|ACO2|PCK2|AHCY|ACOT8|IDH3G|CRYM|DECR1|PIK3R2|NAMPT|ALDOC|SPR|AKR7A2|GDA|COX6B1|GNG13|SLC27A1|PSMB7|SLC7A5|ALDH2|HIBADH|L2HGDH|ABHD10|GLUD1|HNMT|QDPR|CA2|AGL|ADH5|NDUFS4|ALDH1A1|HPRT1|CYCS|GLUL|GRHPR|CRAT|PKM|NDUFV1|NDUFV2|PGP|DLST|ACSL4|GYG1|ALDH9A1|AGK|PNP|MT-ND1|AGT|ACAT2|ECHS1|RAP1A|AHCYL1|PTGDS|FABP3|HSD17B8|ALDH4A1|ACOT7|ACOT9|PDHA1|NADK2|PSME1|FECH|BCKDK|ALDOA|GATM|PAICS|ALD…	417|558|978|585|777|921|1047|525|1101|966|744|759|831|522|822|798|690|429|351|459|999|813|573|699|963|894|396|945|1083|423|954|1011|804|1068|876|993|411|1026|327|933|780|1017|501|591|666|762|849|678|843|960|405|498|627|702|465|333|720|723|687|660|900|402|825|750|858|867|684|783|603|1050|339|909|492|378|549|534|330|513
Reactome Pathways	HSA-71291	Metabolism of amino acids and derivatives	365	21	7.7e-06	5.11351	HSD17B10|AHCY|CRYM|PSMB7|SLC7A5|HIBADH|GLUD1|HNMT|QDPR|GLUL|GRHPR|DLST|ALDH9A1|ECHS1|ALDH4A1|PDHA1|PSME1|BCKDK|GATM|ALDH7A1|GAMT	417|777|525|351|459|813|963|894|396|876|993|1017|666|405|720|660|402|750|867|783|339
Reactome Pathways	HSA-168249	Innate Immune System	1025	35	2.53e-05	4.59688	PIK3R2|ALDOC|SKP1|PPP3R1|PSMB7|COTL1|CAPZA1|ATP6V1B2|CCT8|ELMO2|S100B|S100A1|AGL|ARPC5|APEH|ELMO1|PKM|GYG1|PRDX6|ACTB|PNP|ILF2|RAP1A|AHCYL1|ATP6V1G1|PADI2|PSME1|GRB2|PPP3CA|ALDOA|CST3|GCA|PPIA|METTL7A|ACTG1	966|759|642|714|351|579|612|546|717|729|531|375|1083|765|1020|582|1026|591|471|975|849|309|498|627|732|1089|402|738|870|858|438|390|420|675|957
Reactome Pathways	HSA-1428517	The citric acid (TCA) cycle and respiratory electron transport	176	13	0.00023	3.63827	NDUFB7|ACO2|IDH3G|COX6B1|L2HGDH|NDUFS4|CYCS|NDUFV1|NDUFV2|DLST|MT-ND1|PDHA1|UQCRB	558|978|1047|798|573|954|1068|327|933|1017|678|660|378
Reactome Pathways	HSA-6798695	Neutrophil degranulation	473	19	0.0029	2.5376	ALDOC|PSMB7|COTL1|CCT8|AGL|ARPC5|APEH|PKM|GYG1|PRDX6|PNP|ILF2|RAP1A|PADI2|ALDOA|CST3|GCA|PPIA|METTL7A	759|351|579|717|1083|765|1020|1026|591|471|849|309|498|1089|858|438|390|420|675
Reactome Pathways	HSA-8978868	Fatty acid metabolism	175	11	0.005	2.30103	ACOT8|DECR1|CRAT|ACSL4|ECHS1|PTGDS|HSD17B8|ACOT7|ACOT9|EPHX2|DBI	921|1101|411|501|405|702|333|723|687|492|534
Reactome Pathways	HSA-109582	Hemostasis	605	21	0.0053	2.27572	SCG3|PIK3R2|GNG13|PPP2R5A|SLC7A5|CAPZA1|SRI|ATP1B3|JAM3|LRRC16A|ACTB|RAP1A|PTPN1|AK3|MAG|GRB2|ALDOA|TF|CAPZB|ARRB1|PPIA	624|966|690|837|459|612|741|426|321|1014|975|498|693|846|1053|738|858|633|657|855|420
Reactome Pathways	HSA-2029480	Fcgamma receptor (FCGR) dependent phagocytosis	87	8	0.0053	2.27572	PIK3R2|ELMO2|ARPC5|ELMO1|ACTB|AHCYL1|GRB2|ACTG1	966|729|765|582|975|627|738|957
Reactome Pathways	HSA-190873	Gap junction degradation	12	4	0.0075	2.12494	GJA1|ACTB|MYO6|ACTG1	444|975|372|957
Reactome Pathways	HSA-611105	Respiratory electron transport	101	8	0.01	2	NDUFB7|COX6B1|NDUFS4|CYCS|NDUFV1|NDUFV2|MT-ND1|UQCRB	558|798|954|1068|327|933|678|378
Reactome Pathways	HSA-210455	Astrocytic Glutamate-Glutamine Uptake And Metabolism	4	3	0.0109	1.96257	SLC1A3|SLC1A2|GLUL	663|1080|876
Reactome Pathways	HSA-983705	Signaling by the B Cell Receptor (BCR)	109	8	0.0127	1.8962	SKP1|PPP3R1|PSMB7|AHCYL1|PSME1|GRB2|PPP3CA|PPIA	642|714|351|627|402|738|870|420
Reactome Pathways	HSA-8856828	Clathrin-mediated endocytosis	145	9	0.0143	1.84466	ARPC5|ACTB|SYT2|SGIP1|GRB2|TF|ARRB1|FNBP1|ACTG1	765|975|1059|468|738|633|855|1107|957
Reactome Pathways	HSA-5663202	Diseases of signal transduction by growth factor receptors and second messengers	392	15	0.0155	1.80967	CDC37|PIK3R2|SKP1|PSMB7|PEBP1|PPP2R5A|CTBP1|HDAC11|AGK|ACTB|RAP1A|PSME1|GRB2|ARRB1|ACTG1	1005|966|642|351|654|837|705|552|762|975|498|402|738|855|957
Reactome Pathways	HSA-6802948	Signaling by high-kinase activity BRAF mutants	36	5	0.0159	1.7986	PEBP1|ACTB|RAP1A|ARRB1|ACTG1	654|975|498|855|957
Reactome Pathways	HSA-9664422	FCGR3A-mediated phagocytosis	60	6	0.0164	1.78516	ELMO2|ARPC5|ELMO1|ACTB|GRB2|ACTG1	729|765|582|975|738|957
Reactome Pathways	HSA-2029482	Regulation of actin dynamics for phagocytic cup formation	62	6	0.0164	1.78516	ELMO2|ARPC5|ELMO1|ACTB|GRB2|ACTG1	729|765|582|975|738|957
Reactome Pathways	HSA-77289	Mitochondrial Fatty Acid Beta-Oxidation	37	5	0.0164	1.78516	DECR1|ECHS1|ACOT7|ACOT9|DBI	1101|405|723|687|534
Reactome Pathways	HSA-6802952	Signaling by BRAF and RAF fusions	65	6	0.0181	1.74232	PEBP1|AGK|ACTB|RAP1A|ARRB1|ACTG1	654|762|975|498|855|957
Reactome Pathways	HSA-5674135	MAP2K and MAPK activation	40	5	0.0181	1.74232	PEBP1|ACTB|RAP1A|ARRB1|ACTG1	654|975|498|855|957
Reactome Pathways	HSA-70895	Branched-chain amino acid catabolism	21	4	0.0181	1.74232	HSD17B10|HIBADH|ECHS1|BCKDK	417|813|405|750
Reactome Pathways	HSA-2454202	Fc epsilon receptor (FCERI) signaling	129	8	0.0191	1.71897	PIK3R2|SKP1|PPP3R1|PSMB7|AHCYL1|PSME1|GRB2|PPP3CA	966|642|714|351|627|402|738|870
Reactome Pathways	HSA-6802946	Signaling by moderate kinase activity BRAF mutants	45	5	0.0244	1.61261	PEBP1|ACTB|RAP1A|ARRB1|ACTG1	654|975|498|855|957
Reactome Pathways	HSA-6802955	Paradoxical activation of RAF signaling by kinase inactive BRAF	45	5	0.0244	1.61261	PEBP1|ACTB|RAP1A|ARRB1|ACTG1	654|975|498|855|957
Reactome Pathways	HSA-9649948	Signaling downstream of RAS mutants	45	5	0.0244	1.61261	PEBP1|ACTB|RAP1A|ARRB1|ACTG1	654|975|498|855|957
Reactome Pathways	HSA-437239	Recycling pathway of L1	47	5	0.0244	1.61261	DPYSL2|ACTB|EZR|RDX|ACTG1	801|975|807|342|957
Reactome Pathways	HSA-210991	Basigin interactions	25	4	0.0244	1.61261	SLC7A5|ATP1B3|MAG|PPIA	459|426|1053|420
Reactome Pathways	HSA-2025928	Calcineurin activates NFAT	9	3	0.0244	1.61261	PPP3R1|PPP3CA|PPIA	714|870|420
Reactome Pathways	HSA-425393	Transport of inorganic cations/anions and amino acids/oligopeptides	106	7	0.0251	1.60033	SLC7A5|SLC4A1|SLC1A3|SRI|SLC1A2|SLC25A18|SLC4A4	459|540|663|741|1080|636|576
Reactome Pathways	HSA-390450	Folding of actin by CCT/TriC	10	3	0.0265	1.57675	CCT8|ACTB|CCT4	717|975|348
Reactome Pathways	HSA-389957	Prefoldin mediated transfer of substrate to CCT/TriC	27	4	0.0281	1.55129	VBP1|CCT8|ACTB|CCT4	747|717|975|348
Reactome Pathways	HSA-8953897	Cellular responses to external stimuli	558	17	0.03	1.52288	ST13|EIF2S3|PSMB7|CAPZA1|ATP6V1B2|TERF2IP|CYCS|SNCB|PRDX6|STIP1|CSRP1|RBBP4|ATP6V1G1|PSME1|HSPA2|TXNRD2|CAPZB	816|561|351|612|546|600|1068|987|471|537|873|354|732|402|594|912|657
Reactome Pathways	HSA-1168372	Downstream signaling events of B Cell Receptor (BCR)	79	6	0.03	1.52288	SKP1|PPP3R1|PSMB7|PSME1|PPP3CA|PPIA	642|714|351|402|870|420
Reactome Pathways	HSA-196025	Formation of annular gap junctions	11	3	0.03	1.52288	GJA1|ACTB|ACTG1	444|975|957
Reactome Pathways	HSA-5607763	CLEC7A (Dectin-1) induces NFAT activation	11	3	0.03	1.52288	PPP3R1|AHCYL1|PPP3CA	714|627|870
Reactome Pathways	HSA-168256	Immune System	1956	40	0.0322	1.49214	PIK3R2|ALDOC|SKP1|PPP3R1|PSMB7|PPP2R5A|COTL1|CAPZA1|ATP6V1B2|CCT8|ELMO2|S100B|S100A1|AGL|ARPC5|APEH|ELMO1|PKM|GYG1|PRDX6|HNRNPA2B1|ACTB|PNP|ILF2|RAP1A|AHCYL1|PTPN1|ATP6V1G1|PADI2|FBXL18|PSME1|GRB2|PPP3CA|ALDOA|CST3|GCA|CAPZB|PPIA|METTL7A|ACTG1	966|759|642|714|351|837|579|612|546|717|729|531|375|1083|765|1020|582|1026|591|471|984|975|849|309|498|627|693|732|1089|897|402|738|870|858|438|390|657|420|675|957
Reactome Pathways	HSA-5673001	RAF/MAP kinase cascade	274	11	0.0322	1.49214	PIK3R2|PSMB7|PEBP1|PPP2R5A|ACTB|RAP1A|PSME1|GRB2|ARRB1|SPTB|ACTG1	966|351|654|837|975|498|402|738|855|447|957
Reactome Pathways	HSA-71064	Lysine catabolism	12	3	0.033	1.48149	CRYM|DLST|ALDH7A1	525|1017|783
Reactome Pathways	HSA-71384	Ethanol oxidation	12	3	0.033	1.48149	ALDH2|ADH5|ALDH1A1	999|423|1011
Reactome Pathways	HSA-373760	L1CAM interactions	119	7	0.0336	1.47366	SCN1A|DPYSL2|ACTB|EZR|RDX|SPTB|ACTG1	885|801|975|807|342|447|957
Reactome Pathways	HSA-6799198	Complex I biogenesis	55	5	0.0336	1.47366	NDUFB7|NDUFS4|NDUFV1|NDUFV2|MT-ND1	558|954|327|933|678
Reactome Pathways	HSA-71406	Pyruvate metabolism and Citric Acid (TCA) cycle	55	5	0.0336	1.47366	ACO2|IDH3G|L2HGDH|DLST|PDHA1	978|1047|573|1017|660
Reactome Pathways	HSA-2871809	FCERI mediated Ca+2 mobilization	31	4	0.0336	1.47366	PPP3R1|AHCYL1|GRB2|PPP3CA	714|627|738|870
Reactome Pathways	HSA-389661	Glyoxylate metabolism and glycine degradation	31	4	0.0336	1.47366	GRHPR|DLST|ALDH4A1|PDHA1	993|1017|720|660
Reactome Pathways	HSA-445095	Interaction between L1 and Ankyrins	31	4	0.0336	1.47366	SCN1A|ACTB|SPTB|ACTG1	885|975|447|957
Reactome Pathways	HSA-5682910	LGI-ADAM interactions	14	3	0.0394	1.4045	LGI3|LGI4|LGI1	474|630|882
Reactome Pathways	HSA-70263	Gluconeogenesis	34	4	0.0404	1.39362	PCK2|ALDOC|ALDOA|ENO2	585|759|858|549
Reactome Pathways	HSA-70326	Glucose metabolism	92	6	0.0422	1.37469	PCK2|ALDOC|PKM|PGP|ALDOA|ENO2	585|759|1026|780|858|549
Reactome Pathways	HSA-390466	Chaperonin-mediated protein folding	94	6	0.046	1.33724	GNG13|VBP1|CCT8|ACTB|SKIV2L|CCT4	690|747|717|975|432|348
Reactome Pathways	HSA-5663213	RHO GTPases Activate WASPs and WAVEs	36	4	0.0466	1.33161	ARPC5|ACTB|GRB2|ACTG1	765|975|738|957
Reactome Pathways	HSA-382551	Transport of small molecules	721	19	0.0485	1.31426	SKP1|GNG13|SLC27A1|EIF2S3|LRRC8A|PSMB7|SLC7A5|SLC4A1|SLC1A3|SRI|ATP6V1B2|SLC1A2|CA2|ATP1B3|SLC25A18|ATP6V1G1|PSME1|TF|SLC4A4	642|690|429|561|486|351|459|540|663|741|546|1080|945|426|636|732|402|633|576
Reactome Pathways	HSA-5607764	CLEC7A (Dectin-1) signaling	96	6	0.0485	1.31426	SKP1|PPP3R1|PSMB7|AHCYL1|PSME1|PPP3CA	642|714|351|627|402|870
Reactome Pathways	HSA-5660489	MTF1 activates gene expression	3	2	0.0485	1.31426	SNCB|CSRP1	987|873
Reactome Pathways	HSA-4420097	VEGFA-VEGFR2 Pathway	97	6	0.0493	1.30715	PIK3R2|ELMO2|ELMO1|ACTB|AHCYL1|ACTG1	966|729|582|975|627|957
