# Supplementary material for: Cortical Pathology in Vanishing White Matter
Source: Cells. 2022 Nov 12;11(22):3581. doi: 10.3390/cells11223581 (PMC9688115; doi:10.3390/cells11223581)
Supplement: Supplementary file 1 [file cells-11-03581-s001.zip › cells-1858119_Man et al. Table S6_final.xlsx]

## Sheet: Table S6A
Protein	ProteinID	Description	log2(FC)	Direction	Cell type	In largest subnetwork?
GLUL	P15104	Glutamine synthetase	-7.81539	down	Mature astrocytes	Yes
GJA1	P17302	Gap junction alpha-1 protein	-6.43822	down	Mature astrocytes	Yes
CST3	P01034	Cystatin-C	-6.04728	down	Mature astrocytes	Yes
PTGDS	P41222	Prostaglandin-H2 D-isomerase	-5.85322	down	Mature astrocytes	Yes
SYT2	Q8N9I0	Synaptotagmin-2	-5.83348	down	Fetal astrocytes	Yes
PPP1R1B	Q9UD71	Protein phosphatase 1 regulatory subunit 1B	-5.48308	down	Mature astrocytes	Yes
ALDH1A1	P00352	Retinal dehydrogenase 1	-5.33978	down	Mature astrocytes	Yes
ERMN	Q8TAM6	Ermin	-5.31922	down	Oligodendrocytes	Yes
LGI3	Q8N145	Leucine-rich repeat LGI family member 3	-5.1467	down	Oligodendrocytes	Yes
SERPINI1	Q99574	Neuroserpin	-4.9945	down	Neurons	Yes
ALDH7A1	P49419	Alpha-aminoadipic semialdehyde dehydrogenase	-4.63081	down	Mature astrocytes	Yes
PNP	P00491	Purine nucleoside phosphorylase	-4.23475	down	Microglia	Yes
DAAM2	Q86T65	Disheveled-associated activator of morphogenesis 2	-4.08981	down	Oligodendrocytes	Yes
AGT	P01019	Angiotensinogen;Angiotensin-1;Angiotensin-2;Angiotensin-3;Angiotensin-4;Angiotensin 1-9;Angiotensin 1-7;Angiotensin 1-5;Angiotensin 1-4	-3.84973	down	Mature astrocytes	Yes
OPALIN	Q96PE5	Opalin	-3.81704	down	Oligodendrocytes	Yes
KCNA1	Q09470	Potassium voltage-gated channel subfamily A member 1	-3.71539	down	Neurons	Yes
ATP1B3	P54709	Sodium/potassium-transporting ATPase subunit beta-3	-3.71308	down	Microglia	Yes
AHCYL1	O43865	Putative adenosylhomocysteinase 2	-3.70053	down	Mature astrocytes	Yes
GABRG2	P18507	Gamma-aminobutyric acid receptor subunit gamma-2;Gamma-aminobutyric acid receptor subunit gamma-1	-3.67886	down	Neurons	Yes
PRDX6	P30041	Peroxiredoxin-6	-3.55305	down	Mature astrocytes	Yes
SLC9A3R1	O14745	Na(+)/H(+) exchange regulatory cofactor NHE-RF1	-3.44899	down	Mature astrocytes	Yes
ALDOC	P09972	Fructose-bisphosphate aldolase C	-3.39984	down	Mature astrocytes	Yes
LGI4	Q8N135	Leucine-rich repeat LGI family member 4	-3.3576	down	Mature astrocytes	Yes
PMP2	P02689	Myelin P2 protein	-3.35623	down	Mature astrocytes	Yes
SNCG	O76070	Gamma-synuclein	-3.2851	down	Mature astrocytes	Yes
SERPINB9	P50453	Serpin B9	-3.26238	down	Microglia	Yes
SCN1A	P35498	Sodium channel protein type 1 subunit alpha	-3.22668	down	Neurons	Yes
S100A1	P23297	Protein S100-A1	-3.19844	down	Mature astrocytes	Yes
ALDH4A1	P30038	Delta-1-pyrroline-5-carboxylate dehydrogenase, mitochondrial	-3.11413	down	Mature astrocytes	Yes
SELENBP1	Q13228	Selenium-binding protein 1	-3.07005	down	Mature astrocytes	Yes
SGIP1	Q9BQI5	SH3-containing GRB2-like protein 3-interacting protein 1	-2.94328	down	Neurons	Yes
SLC1A2	P43004	Excitatory amino acid transporter 2	-2.70772	down	Mature astrocytes	Yes
GDA	Q9Y2T3	Guanine deaminase	-2.56396	down	Neurons	Yes
SLC1A3	P43003	Excitatory amino acid transporter 1	-2.55977	down	Mature astrocytes	Yes
CALB2	P22676	Calretinin	-2.4845	down	Neurons	Yes
HSPA2	P54652	Heat shock-related 70 kDa protein 2	-2.36482	down	Oligodendrocytes	Yes
NDRG2	Q9UN36	Protein NDRG2	-2.24116	down	Mature astrocytes	Yes
ENO2	P09104	Gamma-enolase	-2.20368	down	Neurons	Yes
SNCB	Q16143	Beta-synuclein	-2.0824	down	Neurons	Yes
MAG	P20916	Myelin-associated glycoprotein	-2.0821	down	Oligodendrocytes	Yes
GLUD1	P00367	Glutamate dehydrogenase 1, mitochondrial;Glutamate dehydrogenase 2, mitochondrial	-2.00573	down	Mature astrocytes	Yes
SLC4A4	Q9Y6R1	Electrogenic sodium bicarbonate cotransporter 1	-1.92019	down	Mature astrocytes	Yes
CFL2	Q9Y281	Cofilin-2	-1.89254	down	Oligodendrocytes	Yes
CRYM	Q14894	Ketimine reductase mu-crystallin	-1.85118	down	Neurons	Yes
PREPL	Q4J6C6	Prolyl endopeptidase-like	-1.81553	down	Neurons	Yes
CDC37	Q16543	Hsp90 co-chaperone Cdc37;Hsp90 co-chaperone Cdc37, N-terminally processed	-1.80322	down	Fetal astrocytes	Yes
SNCA	P37840	Alpha-synuclein	-1.73816	down	Neurons	Yes
ALDH2	P05091	Aldehyde dehydrogenase, mitochondrial	-1.68842	down	Mature astrocytes	Yes
NDUFB7	P17568	NADH dehydrogenase [ubiquinone] 1 beta subcomplex subunit 7	-1.63915	down	Fetal astrocytes	Yes
QDPR	P09417	Dihydropteridine reductase	-1.62534	down	Oligodendrocytes	Yes
NDUFV1	P49821	NADH dehydrogenase [ubiquinone] flavoprotein 1, mitochondrial	-1.61218	down	Fetal astrocytes	Yes
CNRIP1	Q96F85	CB1 cannabinoid receptor-interacting protein 1	2.05425	up	Neurons	Yes
GRM7	Q14831	Metabotropic glutamate receptor 7	3.1532	up	Neurons	Yes
TNC	P24821	Tenascin	7.08338	up	Fetal astrocytes	Yes
HRSP12	P52758	Ribonuclease UK114	-6.71445	down	Mature astrocytes	No
TPP1	O14773	Tripeptidyl-peptidase 1	-5.75637	down	Mature astrocytes	No
ZFYVE21	Q9BQ24	Zinc finger FYVE domain-containing protein 21	-4.96726	down	Mature astrocytes	No
GLTP	Q9NZD2	Glycolipid transfer protein	-4.48644	down	Oligodendrocytes	No
NUDT3	O95989	Diphosphoinositol polyphosphate phosphohydrolase 1	-4.40958	down	Mature astrocytes	No
SCG3	Q8WXD2	Secretogranin-3	-4.36898	down	Mature astrocytes	No
ASRGL1	Q7L266	Isoaspartyl peptidase/L-asparaginase;Isoaspartyl peptidase/L-asparaginase alpha chain;Isoaspartyl peptidase/L-asparaginase beta chain	-4.12091	down	Mature astrocytes	No
OGFRL1	Q5TC84	Opioid growth factor receptor-like protein 1	-4.03897	down	Microglia	No
CYB5R2	Q6BCY4	NADH-cytochrome b5 reductase 2	-3.9091	down	Oligodendrocytes	No
SLC25A18	Q9H1K4	Mitochondrial glutamate carrier 2	-3.70037	down	Mature astrocytes	No
LRRC8A	Q8IWT6	Volume-regulated anion channel subunit LRRC8A	-3.41839	down	Mature astrocytes	No
GFOD1	Q9NXC2	Glucose-fructose oxidoreductase domain-containing protein 1	-3.37561	down	Neurons	No
LRRC16A	Q5VZK9	Leucine-rich repeat-containing protein 16A	-3.05462	down	Mature astrocytes	No
OXR1	Q8N573	Oxidation resistance protein 1	-2.82607	down	Neurons	No
VAT1L	Q9HCJ6	Synaptic vesicle membrane protein VAT-1 homolog-like	-2.27837	down	Neurons	No
FABP3	P05413	Fatty acid-binding protein, heart	-1.77939	down	Neurons	No
PABPC1	P11940	Polyadenylate-binding protein 1;Polyadenylate-binding protein 3	-1.66366	down	Microglia	No
PAFAH1B3	Q15102	Platelet-activating factor acetylhydrolase IB subunit gamma	2.04803	up	Fetal astrocytes	No
BAI2	O60241	Brain-specific angiogenesis inhibitor 2	3.37598	up	Fetal astrocytes	No
BOLA2	Q9H3K6	BolA-like protein 2	3.93813	up	Fetal astrocytes	No
ACOT8	O14734	Acyl-coenzyme A thioesterase 8	4.02545	up	Fetal astrocytes	No
PIK3R2	O00459	Phosphatidylinositol 3-kinase regulatory subunit beta	4.1484	up	Fetal astrocytes	No

## Sheet: Table S6B
Category	Term name	Description	No. background proteins	No. Proteins	adj. p-value	-Log10(p-value)	Proteins	Nodes
GO Biological Process	GO:0022898	Regulation of transmembrane transporter activity	269	9	0.00029	3.5376	SLC9A3R1|GJA1|ATP1B3|S100A1|SNCA|AGT|AHCYL1|KCNA1|HSPA2	311|373|363|323|383|385|389|337|361
GO Biological Process	GO:0044282	Small molecule catabolic process	424	11	0.00029	3.5376	CRYM|ALDOC|ALDH2|GLUD1|QDPR|ALDH1A1|GLUL|PNP|ALDH4A1|ALDH7A1|ENO2	289|321|351|315|343|357|407|393|305|345|327
GO Biological Process	GO:0043269	Regulation of ion transport	696	13	0.00029	3.5376	SLC9A3R1|GJA1|ATP1B3|S100A1|SCN1A|SNCA|GRM7|AGT|SYT2|AHCYL1|SNCG|KCNA1|HSPA2	311|373|363|323|417|383|341|385|397|389|413|337|361
GO Biological Process	GO:0034764	Positive regulation of transmembrane transport	208	8	0.00033	3.48149	SLC9A3R1|SLC1A2|ATP1B3|S100A1|SNCA|AGT|KCNA1|HSPA2	311|409|363|323|383|385|337|361
GO Biological Process	GO:0051049	Regulation of transport	1776	19	0.00033	3.48149	SLC9A3R1|GLUD1|SLC1A2|GJA1|ATP1B3|S100A1|LGI3|SCN1A|GLUL|SNCA|GRM7|AGT|SYT2|AHCYL1|SGIP1|SNCG|KCNA1|HSPA2|PREPL	311|315|409|373|363|323|423|417|407|383|341|385|397|389|415|413|337|361|329
GO Biological Process	GO:0055114	Oxidation-reduction process	939	14	0.00036	3.4437	NDUFB7|CRYM|ALDOC|ALDH2|GLUD1|QDPR|ALDH1A1|NDUFV1|SNCA|PRDX6|ALDH4A1|ALDH7A1|SELENBP1|ENO2	331|289|321|351|315|343|357|293|383|425|305|345|421|327
GO Biological Process	GO:0034767	Positive regulation of ion transmembrane transport	160	7	0.00054	3.26761	SLC9A3R1|ATP1B3|S100A1|SNCA|AGT|KCNA1|HSPA2	311|363|323|383|385|337|361
GO Biological Process	GO:0034762	Regulation of transmembrane transport	560	11	0.00054	3.26761	SLC9A3R1|SLC1A2|GJA1|ATP1B3|S100A1|SCN1A|SNCA|AGT|AHCYL1|KCNA1|HSPA2	311|409|373|363|323|417|383|385|389|337|361
GO Biological Process	GO:0007267	Cell-cell signaling	1145	15	0.00054	3.26761	SLC9A3R1|SLC1A3|TNC|SLC1A2|GJA1|SNCB|SNCA|GRM7|AGT|SYT2|SNCG|KCNA1|DAAM2|GABRG2|NDRG2	311|431|295|409|373|335|383|341|385|397|413|337|419|347|377
GO Biological Process	GO:1901606	Alpha-amino acid catabolic process	104	6	0.00066	3.18046	CRYM|GLUD1|QDPR|GLUL|ALDH4A1|ALDH7A1	289|315|343|407|305|345
GO Biological Process	GO:0050954	Sensory perception of mechanical stimulus	175	7	0.00066	3.18046	CRYM|SLC9A3R1|SLC1A3|SCN1A|GRM7|KCNA1|ALDH7A1	289|311|431|417|341|337|345
GO Biological Process	GO:0140352	Export from cell	1028	14	0.00066	3.18046	ALDOC|SLC1A3|SLC1A2|GJA1|ATP1B3|LGI3|SNCA|PRDX6|PNP|AGT|SYT2|SNCG|CST3|SLC4A4	321|431|409|373|363|423|383|425|393|385|397|413|367|349
GO Biological Process	GO:0051050	Positive regulation of transport	923	13	0.001	3	SLC9A3R1|GLUD1|SLC1A2|GJA1|ATP1B3|S100A1|GLUL|SNCA|AGT|AHCYL1|SGIP1|KCNA1|HSPA2	311|315|409|373|363|323|407|383|385|389|415|337|361
GO Biological Process	GO:0001504	Neurotransmitter uptake	27	4	0.0011	2.95861	SLC1A3|SLC1A2|GLUL|SNCA	431|409|407|383
GO Biological Process	GO:0043270	Positive regulation of ion transport	285	8	0.0011	2.95861	SLC9A3R1|ATP1B3|S100A1|SNCA|AGT|AHCYL1|KCNA1|HSPA2	311|363|323|383|385|389|337|361
GO Biological Process	GO:0010959	Regulation of metal ion transport	391	9	0.0011	2.95861	SLC9A3R1|GJA1|ATP1B3|S100A1|SNCA|AGT|AHCYL1|KCNA1|HSPA2	311|373|363|323|383|385|389|337|361
GO Biological Process	GO:0030534	Adult behavior	136	6	0.0015	2.82391	PPP1R1B|SLC1A2|SCN1A|LGI4|SNCG|GABRG2	291|409|417|395|413|347
GO Biological Process	GO:0009612	Response to mechanical stimulus	212	7	0.0015	2.82391	SLC1A3|TNC|GJA1|SCN1A|AGT|KCNA1|MAG	431|295|373|417|385|337|391
GO Biological Process	GO:0007268	Chemical synaptic transmission	418	9	0.0015	2.82391	SLC1A3|SLC1A2|SNCB|SNCA|GRM7|SYT2|SNCG|KCNA1|GABRG2	431|409|335|383|341|397|413|337|347
GO Biological Process	GO:0051046	Regulation of secretion	686	11	0.0015	2.82391	SLC9A3R1|GLUD1|GJA1|LGI3|GLUL|SNCA|GRM7|AGT|SYT2|SNCG|PREPL	311|315|373|423|407|383|341|385|397|413|329
GO Biological Process	GO:1904064	Positive regulation of cation transmembrane transport	145	6	0.0018	2.74473	ATP1B3|S100A1|SNCA|AGT|KCNA1|HSPA2	363|323|383|385|337|361
GO Biological Process	GO:0001505	Regulation of neurotransmitter levels	231	7	0.0019	2.72125	SLC1A3|SLC1A2|GLUL|SNCA|SYT2|SNCG|PREPL	431|409|407|383|397|413|329
GO Biological Process	GO:0051952	Regulation of amine transport	91	5	0.0029	2.5376	SNCA|GRM7|AGT|SYT2|SNCG	383|341|385|397|413
GO Biological Process	GO:0034765	Regulation of ion transmembrane transport	477	9	0.0029	2.5376	SLC9A3R1|ATP1B3|S100A1|SCN1A|SNCA|AGT|AHCYL1|KCNA1|HSPA2	311|363|323|417|383|385|389|337|361
GO Biological Process	GO:0065008	Regulation of biological quality	4042	26	0.0029	2.5376	CRYM|CDC37|PPP1R1B|SLC9A3R1|SLC1A3|GLUD1|SLC1A2|GJA1|ATP1B3|ALDH1A1|CFL2|SCN1A|CALB2|GLUL|SNCA|PRDX6|AGT|SYT2|SGIP1|SNCG|KCNA1|MAG|ERMN|PREPL|SLC4A4|GABRG2	289|353|291|311|431|315|409|373|363|357|355|417|387|407|383|425|385|397|415|413|337|391|283|329|349|347
GO Biological Process	GO:0046903	Secretion	1097	13	0.003	2.52288	ALDOC|SLC9A3R1|SLC1A3|SLC1A2|GJA1|LGI3|SNCA|PRDX6|PNP|AGT|SYT2|SNCG|CST3	321|311|431|409|373|423|383|425|393|385|397|413|367
GO Biological Process	GO:0006810	Transport	4353	27	0.003	2.52288	CRYM|CDC37|ALDOC|SLC9A3R1|SLC1A3|SLC1A2|GJA1|ATP1B3|LGI3|SCN1A|GLUL|SNCB|SNCA|PRDX6|PNP|AGT|SYT2|AHCYL1|SGIP1|SNCG|KCNA1|HSPA2|CST3|PREPL|SLC4A4|SELENBP1|GABRG2	289|353|321|311|431|409|373|363|423|417|407|335|383|425|393|385|397|389|415|413|337|361|367|329|349|421|347
GO Biological Process	GO:0032412	Regulation of ion transmembrane transporter activity	260	7	0.0032	2.49485	SLC9A3R1|ATP1B3|S100A1|AGT|AHCYL1|KCNA1|HSPA2	311|363|323|385|389|337|361
GO Biological Process	GO:1903530	Regulation of secretion by cell	630	10	0.0032	2.49485	GLUD1|GJA1|LGI3|GLUL|SNCA|GRM7|AGT|SYT2|SNCG|PREPL	315|373|423|407|383|341|385|397|413|329
GO Biological Process	GO:0021762	Substantia nigra development	45	4	0.0036	2.4437	GLUD1|S100A1|MAG|NDRG2	315|323|391|377
GO Biological Process	GO:0007399	Nervous system development	2371	19	0.0037	2.4318	GDA|SLC9A3R1|SLC1A3|TNC|GLUD1|SLC1A2|GJA1|S100A1|SERPINI1|LGI4|AGT|SYT2|OPALIN|KCNA1|MAG|CST3|DAAM2|GABRG2|NDRG2	371|311|431|295|315|409|373|323|411|395|385|397|333|337|391|367|419|347|377
GO Biological Process	GO:0006814	Sodium ion transport	182	6	0.0043	2.36653	SLC9A3R1|SLC1A3|SLC1A2|ATP1B3|SCN1A|SLC4A4	311|431|409|363|417|349
GO Biological Process	GO:0006520	Cellular amino acid metabolic process	278	7	0.0043	2.36653	CRYM|SLC1A3|GLUD1|QDPR|GLUL|ALDH4A1|ALDH7A1	289|431|315|343|407|305|345
GO Biological Process	GO:0032940	Secretion by cell	979	12	0.0043	2.36653	ALDOC|SLC1A3|SLC1A2|GJA1|LGI3|SNCA|PRDX6|PNP|AGT|SYT2|SNCG|CST3	321|431|409|373|423|383|425|393|385|397|413|367
GO Biological Process	GO:0006091	Generation of precursor metabolites and energy	405	8	0.005	2.30103	NDUFB7|ALDOC|ALDH2|QDPR|ALDH1A1|NDUFV1|ALDH4A1|ENO2	331|321|351|343|357|293|305|327
GO Biological Process	GO:0050433	Regulation of catecholamine secretion	57	4	0.0071	2.14874	SNCA|AGT|SYT2|SNCG	383|385|397|413
GO Biological Process	GO:0015800	Acidic amino acid transport	58	4	0.0074	2.13077	SLC9A3R1|SLC1A3|SLC1A2|GJA1	311|431|409|373
GO Biological Process	GO:0007610	Behavior	572	9	0.0076	2.11919	PPP1R1B|SLC1A3|SLC1A2|SCN1A|LGI4|AGT|SNCG|CST3|GABRG2	291|431|409|417|395|385|413|367|347
GO Biological Process	GO:0044283	Small molecule biosynthetic process	572	9	0.0076	2.11919	ALDOC|GDA|SLC1A3|GLUD1|QDPR|GLUL|PNP|PTGDS|ENO2	321|371|431|315|343|407|393|301|327
GO Biological Process	GO:0050804	Modulation of chemical synaptic transmission	446	8	0.0086	2.0655	SLC1A3|CALB2|GLUL|SNCA|GRM7|AGT|SNCG|PREPL	431|387|407|383|341|385|413|329
GO Biological Process	GO:0044281	Small molecule metabolic process	1684	15	0.0096	2.01773	CRYM|ALDOC|GDA|ALDH2|SLC1A3|GLUD1|QDPR|ALDH1A1|GLUL|PNP|AHCYL1|PTGDS|ALDH4A1|ALDH7A1|ENO2	289|321|371|351|431|315|343|357|407|393|389|301|305|345|327
GO Biological Process	GO:1904062	Regulation of cation transmembrane transport	337	7	0.0105	1.97881	SLC9A3R1|ATP1B3|S100A1|SNCA|AGT|KCNA1|HSPA2	311|363|323|383|385|337|361
GO Biological Process	GO:0043090	Amino acid import	22	3	0.0107	1.97062	SLC9A3R1|SLC1A3|SLC1A2	311|431|409
GO Biological Process	GO:0006836	Neurotransmitter transport	139	5	0.0114	1.9431	SLC1A3|SLC1A2|GLUL|SNCA|SYT2	431|409|407|383|397
GO Biological Process	GO:0006082	Organic acid metabolic process	964	11	0.0137	1.86328	CRYM|ALDOC|SLC1A3|GLUD1|QDPR|GLUL|PNP|PTGDS|ALDH4A1|ALDH7A1|ENO2	289|321|431|315|343|407|393|301|305|345|327
GO Biological Process	GO:0070633	Transepithelial transport	26	3	0.016	1.79588	SLC1A3|SLC1A2|AHCYL1	431|409|389
GO Biological Process	GO:0009065	Glutamine family amino acid catabolic process	27	3	0.0168	1.77469	GLUD1|GLUL|ALDH4A1	315|407|305
GO Biological Process	GO:0007605	Sensory perception of sound	153	5	0.0168	1.77469	CRYM|SLC9A3R1|SLC1A3|GRM7|ALDH7A1	289|311|431|341|345
GO Biological Process	GO:0051179	Localization	5591	29	0.0196	1.70774	CRYM|CDC37|ALDOC|SLC9A3R1|SLC1A3|SLC1A2|GJA1|ATP1B3|CFL2|LGI3|SCN1A|GLUL|SNCB|SNCA|PRDX6|PNP|AGT|SYT2|AHCYL1|SGIP1|SNCG|KCNA1|MAG|HSPA2|CST3|PREPL|SLC4A4|SELENBP1|GABRG2	289|353|321|311|431|409|373|363|355|423|417|407|335|383|425|393|385|397|389|415|413|337|391|361|367|329|349|421|347
GO Biological Process	GO:0009987	Cellular process	15024	52	0.0196	1.70774	NDUFB7|CRYM|CDC37|ALDOC|GDA|PPP1R1B|PMP2|ALDH2|SLC9A3R1|SLC1A3|TNC|GLUD1|SLC1A2|QDPR|GJA1|ATP1B3|S100A1|SERPINI1|ALDH1A1|CFL2|LGI3|SCN1A|CALB2|GLUL|SNCB|LGI4|NDUFV1|SNCA|PRDX6|GRM7|PNP|AGT|SYT2|AHCYL1|SGIP1|OPALIN|PTGDS|SNCG|ALDH4A1|SERPINB9|KCNA1|MAG|HSPA2|ERMN|CST3|DAAM2|PREPL|ALDH7A1|SLC4A4|GABRG2|ENO2|NDRG2	331|289|353|321|371|291|325|351|311|431|295|315|409|343|373|363|323|411|357|355|423|417|387|407|335|395|293|383|425|341|393|385|397|389|415|333|301|413|305|433|337|391|361|283|367|419|329|345|349|347|327|377
GO Biological Process	GO:0098657	Import into cell	164	5	0.0202	1.69465	SLC1A3|SLC1A2|ATP1B3|GLUL|SNCA	431|409|363|407|383
GO Biological Process	GO:0002028	Regulation of sodium ion transport	85	4	0.0208	1.68194	SLC9A3R1|ATP1B3|AGT|AHCYL1	311|363|385|389
GO Biological Process	GO:0019752	Carboxylic acid metabolic process	853	10	0.0208	1.68194	CRYM|ALDOC|SLC1A3|GLUD1|QDPR|GLUL|PTGDS|ALDH4A1|ALDH7A1|ENO2	289|321|431|315|343|407|301|305|345|327
GO Biological Process	GO:0070779	D-aspartate import across plasma membrane	4	2	0.0212	1.67366	SLC1A3|SLC1A2	431|409
GO Biological Process	GO:0006536	Glutamate metabolic process	31	3	0.0212	1.67366	GLUD1|GLUL|ALDH4A1	315|407|305
GO Biological Process	GO:0014047	Glutamate secretion	32	3	0.022	1.65758	SLC1A3|SLC1A2|GJA1	431|409|373
GO Biological Process	GO:0022900	Electron transport chain	174	5	0.0235	1.62893	NDUFB7|ALDH2|QDPR|NDUFV1|ALDH4A1	331|351|343|293|305
GO Biological Process	GO:0034635	Glutathione transport	5	2	0.0272	1.56543	SLC9A3R1|GJA1	311|373
GO Biological Process	GO:0014059	Regulation of dopamine secretion	36	3	0.0292	1.53462	SNCA|SYT2|SNCG	383|397|413
GO Biological Process	GO:0015672	Monovalent inorganic cation transport	441	7	0.0361	1.44249	SLC9A3R1|SLC1A3|SLC1A2|ATP1B3|SCN1A|KCNA1|SLC4A4	311|431|409|363|417|337|349
GO Biological Process	GO:0042391	Regulation of membrane potential	440	7	0.0361	1.44249	GJA1|ATP1B3|SCN1A|AGT|KCNA1|SLC4A4|GABRG2	373|363|417|385|337|349|347
GO Biological Process	GO:0071496	Cellular response to external stimulus	309	6	0.0362	1.44129	TNC|SLC1A2|GJA1|GLUL|AGT|MAG	295|409|373|407|385|391
GO Biological Process	GO:0044057	Regulation of system process	592	8	0.0362	1.44129	SLC9A3R1|GJA1|ATP1B3|S100A1|AGT|AHCYL1|KCNA1|MAG	311|373|363|323|385|389|337|391
GO Biological Process	GO:0032414	Positive regulation of ion transmembrane transporter activity	105	4	0.037	1.4318	ATP1B3|S100A1|KCNA1|HSPA2	363|323|337|361
GO Biological Process	GO:0051239	Regulation of multicellular organismal process	3227	20	0.037	1.4318	SLC9A3R1|GJA1|ATP1B3|S100A1|SERPINI1|ALDH1A1|GLUL|LGI4|SNCA|PNP|AGT|SYT2|AHCYL1|OPALIN|PTGDS|KCNA1|MAG|CST3|DAAM2|NDRG2	311|373|363|323|411|357|407|395|383|393|385|397|389|333|301|337|391|367|419|377
GO Biological Process	GO:0098712	L-glutamate import across plasma membrane	7	2	0.0409	1.38828	SLC1A3|SLC1A2	431|409
GO Biological Process	GO:0009628	Response to abiotic stimulus	1147	11	0.0409	1.38828	PPP1R1B|SLC1A3|TNC|SLC1A2|GJA1|SCN1A|AGT|KCNA1|MAG|HSPA2|CST3	291|431|295|409|373|417|385|337|391|361|367
GO Biological Process	GO:0032501	Multicellular organismal process	6933	32	0.0458	1.33913	CRYM|GDA|PPP1R1B|SLC9A3R1|SLC1A3|TNC|GLUD1|SLC1A2|QDPR|GJA1|S100A1|SERPINI1|CFL2|SCN1A|GLUL|LGI4|GRM7|PNP|AGT|SYT2|SGIP1|OPALIN|SNCG|KCNA1|MAG|HSPA2|ERMN|CST3|DAAM2|ALDH7A1|GABRG2|NDRG2	289|371|291|311|431|295|315|409|343|373|323|411|355|417|407|395|341|393|385|397|415|333|413|337|391|361|283|367|419|345|347|377
GO Biological Process	GO:0050789	Regulation of biological process	11475	44	0.0472	1.32606	CRYM|CDC37|PPP1R1B|SLC9A3R1|CNRIP1|SLC1A3|TNC|GLUD1|SLC1A2|GJA1|ATP1B3|S100A1|SERPINI1|ALDH1A1|CFL2|LGI3|SCN1A|CALB2|GLUL|SNCB|LGI4|SNCA|PRDX6|GRM7|PNP|AGT|SYT2|AHCYL1|SGIP1|OPALIN|PTGDS|SNCG|SERPINB9|KCNA1|MAG|HSPA2|ERMN|CST3|DAAM2|PREPL|SLC4A4|GABRG2|ENO2|NDRG2	289|353|291|311|427|431|295|315|409|373|363|323|411|357|355|423|417|387|407|335|395|383|425|341|393|385|397|389|415|333|301|413|433|337|391|361|283|367|419|329|349|347|327|377
GO Biological Process	GO:0006538	Glutamate catabolic process	8	2	0.0476	1.32239	GLUD1|GLUL	315|407
GO Cellular Component	GO:0070062	Extracellular exosome	2099	28	1.53e-10	9.81531	CRYM|CDC37|ALDOC|PMP2|ALDH2|SLC9A3R1|QDPR|ATP1B3|SERPINI1|ALDH1A1|CFL2|GLUL|PRDX6|PNP|AGT|AHCYL1|PTGDS|SNCG|SERPINB9|HSPA2|ERMN|CST3|DAAM2|ALDH7A1|SLC4A4|SELENBP1|ENO2|NDRG2	289|353|321|325|351|311|343|363|411|357|355|407|425|393|385|389|301|413|433|361|283|367|419|345|349|421|327|377
GO Cellular Component	GO:0031982	Vesicle	3879	35	3.75e-10	9.42597	CRYM|CDC37|ALDOC|PMP2|ALDH2|SLC9A3R1|SLC1A3|QDPR|GJA1|ATP1B3|SERPINI1|ALDH1A1|CFL2|LGI3|GLUL|PRDX6|PNP|AGT|SYT2|AHCYL1|SGIP1|PTGDS|SNCG|SERPINB9|KCNA1|HSPA2|ERMN|CST3|DAAM2|ALDH7A1|SLC4A4|SELENBP1|GABRG2|ENO2|NDRG2	289|353|321|325|351|311|431|343|373|363|411|357|355|423|407|425|393|385|397|389|415|301|413|433|337|361|283|367|419|345|349|421|347|327|377
GO Cellular Component	GO:0005615	Extracellular space	3195	31	3.12e-09	8.50585	CRYM|CDC37|ALDOC|PMP2|ALDH2|SLC9A3R1|TNC|QDPR|ATP1B3|SERPINI1|ALDH1A1|CFL2|GLUL|LGI4|SNCA|PRDX6|PNP|AGT|AHCYL1|PTGDS|SNCG|SERPINB9|HSPA2|ERMN|CST3|DAAM2|ALDH7A1|SLC4A4|SELENBP1|ENO2|NDRG2	289|353|321|325|351|311|295|343|363|411|357|355|407|395|383|425|393|385|389|301|413|433|361|283|367|419|345|349|421|327|377
GO Cellular Component	GO:0043005	Neuron projection	1366	20	7.46e-08	7.12726	PPP1R1B|SLC9A3R1|SLC1A3|SLC1A2|QDPR|S100A1|LGI3|SCN1A|CALB2|GLUL|SNCA|GRM7|SYT2|SNCG|KCNA1|MAG|ERMN|CST3|GABRG2|NDRG2	291|311|431|409|343|323|423|417|387|407|383|341|397|413|337|391|283|367|347|377
GO Cellular Component	GO:0005576	Extracellular region	4166	33	7.46e-08	7.12726	CRYM|CDC37|ALDOC|PMP2|ALDH2|SLC9A3R1|TNC|QDPR|ATP1B3|S100A1|SERPINI1|ALDH1A1|CFL2|LGI3|GLUL|LGI4|SNCA|PRDX6|PNP|AGT|AHCYL1|PTGDS|SNCG|SERPINB9|HSPA2|ERMN|CST3|DAAM2|ALDH7A1|SLC4A4|SELENBP1|ENO2|NDRG2	289|353|321|325|351|311|295|343|363|323|411|357|355|423|407|395|383|425|393|385|389|301|413|433|361|283|367|419|345|349|421|327|377
GO Cellular Component	GO:0030424	Axon	646	14	4.12e-07	6.3851	SLC1A2|SCN1A|CALB2|GLUL|SNCA|GRM7|SYT2|SNCG|KCNA1|MAG|ERMN|CST3|GABRG2|NDRG2	409|417|387|407|383|341|397|413|337|391|283|367|347|377
GO Cellular Component	GO:0005737	Cytoplasm	11428	50	4.37e-06	5.35952	NDUFB7|CRYM|CDC37|ALDOC|GDA|PPP1R1B|PMP2|ALDH2|SLC9A3R1|CNRIP1|SLC1A3|TNC|GLUD1|QDPR|GJA1|ATP1B3|S100A1|SERPINI1|ALDH1A1|CFL2|LGI3|SCN1A|CALB2|GLUL|SNCB|NDUFV1|SNCA|PRDX6|GRM7|PNP|AGT|SYT2|AHCYL1|SGIP1|OPALIN|PTGDS|SNCG|ALDH4A1|SERPINB9|KCNA1|MAG|HSPA2|ERMN|CST3|PREPL|ALDH7A1|SELENBP1|GABRG2|ENO2|NDRG2	331|289|353|321|371|291|325|351|311|427|431|295|315|343|373|363|323|411|357|355|423|417|387|407|335|293|383|425|341|393|385|397|389|415|333|301|413|305|433|337|391|361|283|367|329|345|421|347|327|377
GO Cellular Component	GO:0120025	Plasma membrane bounded cell projection	2193	21	2.51e-05	4.60033	PPP1R1B|SLC9A3R1|SLC1A3|SLC1A2|QDPR|ATP1B3|S100A1|LGI3|SCN1A|CALB2|GLUL|SNCA|GRM7|SYT2|SNCG|KCNA1|MAG|ERMN|CST3|GABRG2|NDRG2	291|311|431|409|343|363|323|423|417|387|407|383|341|397|413|337|391|283|367|347|377
GO Cellular Component	GO:0044297	Cell body	588	11	8.06e-05	4.09366	PPP1R1B|SLC1A3|SLC1A2|SERPINI1|SCN1A|GLUL|SNCG|KCNA1|ERMN|CST3|ENO2	291|431|409|411|417|407|413|337|283|367|327
GO Cellular Component	GO:0043025	Neuronal cell body	518	10	0.0002	3.69897	PPP1R1B|SLC1A3|SERPINI1|SCN1A|GLUL|SNCG|KCNA1|ERMN|CST3|ENO2	291|431|411|417|407|413|337|283|367|327
GO Cellular Component	GO:0044304	Main axon	70	5	0.00024	3.61979	SLC1A2|SCN1A|KCNA1|MAG|ERMN	409|417|337|391|283
GO Cellular Component	GO:0036477	Somatodendritic compartment	852	12	0.00035	3.45593	PPP1R1B|SLC1A3|SERPINI1|SCN1A|CALB2|GLUL|GRM7|SNCG|KCNA1|ERMN|CST3|ENO2	291|431|411|417|387|407|341|413|337|283|367|327
GO Cellular Component	GO:0033270	Paranode region of axon	12	3	0.00093	3.03152	KCNA1|MAG|ERMN	337|391|283
GO Cellular Component	GO:0043209	Myelin sheath	46	4	0.0011	2.95861	PMP2|GLUL|MAG|ERMN	325|407|391|283
GO Cellular Component	GO:0098793	Presynapse	526	9	0.0013	2.88606	SLC1A2|LGI3|CALB2|GLUL|SNCB|SNCA|GRM7|SYT2|KCNA1	409|423|387|407|335|383|341|397|337
GO Cellular Component	GO:0030054	Cell junction	2075	17	0.0025	2.60206	PPP1R1B|SLC1A3|TNC|SLC1A2|GJA1|LGI3|SCN1A|CALB2|GLUL|SNCB|SNCA|GRM7|SYT2|OPALIN|SNCG|KCNA1|GABRG2	291|431|295|409|373|423|417|387|407|335|383|341|397|333|413|337|347
GO Cellular Component	GO:0098796	Membrane protein complex	1141	12	0.0047	2.3279	NDUFB7|SLC9A3R1|SLC1A3|SLC1A2|GJA1|ATP1B3|SCN1A|NDUFV1|SGIP1|KCNA1|HSPA2|GABRG2	331|311|431|409|373|363|417|293|415|337|361|347
GO Cellular Component	GO:0045202	Synapse	1351	13	0.0051	2.29243	PPP1R1B|SLC1A3|SLC1A2|LGI3|CALB2|GLUL|SNCB|SNCA|GRM7|SYT2|SNCG|KCNA1|GABRG2	291|431|409|423|387|407|335|383|341|397|413|337|347
GO Cellular Component	GO:0098590	Plasma membrane region	1219	12	0.008	2.09691	SLC9A3R1|SLC1A3|SLC1A2|GJA1|ATP1B3|CALB2|GRM7|AHCYL1|SGIP1|KCNA1|SLC4A4|GABRG2	311|431|409|373|363|387|341|389|415|337|349|347
GO Cellular Component	GO:0043227	Membrane-bounded organelle	12427	47	0.0082	2.08619	NDUFB7|CRYM|CDC37|ALDOC|PPP1R1B|PMP2|ALDH2|SLC9A3R1|SLC1A3|TNC|GLUD1|QDPR|GJA1|ATP1B3|S100A1|SERPINI1|ALDH1A1|CFL2|LGI3|SCN1A|CALB2|GLUL|NDUFV1|SNCA|PRDX6|PNP|AGT|SYT2|AHCYL1|SGIP1|OPALIN|PTGDS|SNCG|ALDH4A1|SERPINB9|KCNA1|HSPA2|ERMN|CST3|DAAM2|PREPL|ALDH7A1|SLC4A4|SELENBP1|GABRG2|ENO2|NDRG2	331|289|353|321|291|325|351|311|431|295|315|343|373|363|323|411|357|355|423|417|387|407|293|383|425|393|385|397|389|415|333|301|413|305|433|337|361|283|367|419|329|345|349|421|347|327|377
GO Molecular Function	GO:0004029	Aldehyde dehydrogenase (nad+) activity	15	4	0.00062	3.20761	ALDH2|ALDH1A1|ALDH4A1|ALDH7A1	351|357|305|345
GO Molecular Function	GO:0051287	NAD binding	56	5	0.00064	3.19382	ALDH2|GLUD1|QDPR|ALDH1A1|NDUFV1	351|315|343|357|293
GO Molecular Function	GO:0016491	Oxidoreductase activity	726	12	0.00064	3.19382	NDUFB7|CRYM|ALDH2|GLUD1|QDPR|ALDH1A1|NDUFV1|SNCA|PRDX6|ALDH4A1|ALDH7A1|SELENBP1	331|289|351|315|343|357|293|383|425|305|345|421
GO Molecular Function	GO:0031406	Carboxylic acid binding	218	7	0.0016	2.79588	PMP2|SLC1A3|GLUD1|GLUL|GRM7|PTGDS|MAG	325|431|315|407|341|301|391
GO Molecular Function	GO:0016595	Glutamate binding	11	3	0.0026	2.58503	SLC1A3|GLUL|GRM7	431|407|341
GO Molecular Function	GO:0016646	Oxidoreductase activity, acting on the ch-nh group of donors, nad or nadp as acceptor	18	3	0.0082	2.08619	CRYM|QDPR|ALDH4A1	289|343|305
GO Molecular Function	GO:0016597	Amino acid binding	59	4	0.0082	2.08619	SLC1A3|GLUD1|GLUL|GRM7	431|315|407|341
GO Molecular Function	GO:0015081	Sodium ion transmembrane transporter activity	150	5	0.018	1.74473	SLC1A3|SLC1A2|ATP1B3|SCN1A|SLC4A4	431|409|363|417|349
GO Molecular Function	GO:0016639	Oxidoreductase activity, acting on the ch-nh2 group of donors, nad or nadp as acceptor	3	2	0.0184	1.73518	CRYM|GLUD1	289|315
GO Molecular Function	GO:0004857	Enzyme inhibitor activity	377	7	0.0193	1.71444	PPP1R1B|SERPINI1|SNCB|SNCA|AGT|SERPINB9|CST3	291|411|335|383|385|433|367
GO Molecular Function	GO:0005314	High-affinity glutamate transmembrane transporter activity	4	2	0.0224	1.64975	SLC1A3|SLC1A2	431|409
GO Molecular Function	GO:0030234	Enzyme regulator activity	1044	11	0.0224	1.64975	CDC37|PPP1R1B|ATP1B3|SERPINI1|ALDH1A1|SNCB|SNCA|GRM7|AGT|SERPINB9|CST3	353|291|363|411|357|335|383|341|385|433|367
GO Molecular Function	GO:0097718	Disordered domain specific binding	34	3	0.0244	1.61261	GJA1|KCNA1|HSPA2	373|337|361
GO Molecular Function	GO:0004866	Endopeptidase inhibitor activity	181	5	0.0255	1.59346	SERPINI1|SNCA|AGT|SERPINB9|CST3	411|383|385|433|367
GO Molecular Function	GO:0043878	glyceraldehyde-3-phosphate dehydrogenase (NAD+) (non-phosphorylating) activity	6	2	0.029	1.5376	ALDH2|ALDH7A1	351|345
GO Molecular Function	GO:1903136	Cuprous ion binding	6	2	0.029	1.5376	SNCB|SNCA	335|383
KEGG Pathways	hsa01100	Metabolic pathways	1447	17	6.98e-05	4.15614	NDUFB7|ALDOC|GDA|ALDH2|GLUD1|QDPR|ALDH1A1|GLUL|NDUFV1|PRDX6|PNP|AHCYL1|PTGDS|ALDH4A1|ALDH7A1|SELENBP1|ENO2	331|321|371|351|315|343|357|407|293|425|393|389|301|305|345|421|327
KEGG Pathways	hsa04964	Proximal tubule bicarbonate reclamation	23	3	0.0065	2.18709	GLUD1|ATP1B3|SLC4A4	315|363|349
KEGG Pathways	hsa00010	Glycolysis / Gluconeogenesis	65	4	0.0065	2.18709	ALDOC|ALDH2|ALDH7A1|ENO2	321|351|345|327
KEGG Pathways	hsa00250	Alanine, aspartate and glutamate metabolism	36	3	0.0141	1.85078	GLUD1|GLUL|ALDH4A1	315|407|305
KEGG Pathways	hsa04724	Glutamatergic synapse	111	4	0.019	1.72125	SLC1A3|SLC1A2|GLUL|GRM7	431|409|407|341
KEGG Pathways	hsa00330	Arginine and proline metabolism	48	3	0.0209	1.67985	ALDH2|ALDH4A1|ALDH7A1	351|305|345
Reactome Pathways	HSA-210455	Astrocytic Glutamate-Glutamine Uptake And Metabolism	4	3	0.0015	2.82391	SLC1A3|SLC1A2|GLUL	431|409|407
Reactome Pathways	HSA-1430728	Metabolism	2089	17	0.0218	1.66154	NDUFB7|CRYM|ALDOC|GDA|ALDH2|GLUD1|QDPR|ALDH1A1|GLUL|NDUFV1|PNP|AGT|AHCYL1|PTGDS|ALDH4A1|ALDH7A1|ENO2	331|289|321|371|351|315|343|357|407|293|393|385|389|301|305|345|327
